# Supplementary material for: Novel Antimicrobial Compounds as Ophiobolin-Type Sesterterpenes and Pimarane-Type Diterpene From Bipolaris Species TJ403-B1
Source: Front Microbiol. 2020 May 29;11:856. doi: 10.3389/fmicb.2020.00856 (PMC7273749; doi:10.3389/fmicb.2020.00856)
Supplement: DATA SHEET S4 — X-ray crystallographic data (CIFs) of 1, 4, and 8. [file Data_Sheet_4.ZIP]

Archive with 3 entries (3 files):
- 1.cif
- 4.cif
- 8.cif
