# Supplementary material for: Novel Antimicrobial Compounds as Ophiobolin-Type Sesterterpenes and Pimarane-Type Diterpene From Bipolaris Species TJ403-B1
Source: Front Microbiol. 2020 May 29;11:856. doi: 10.3389/fmicb.2020.00856 (PMC7273749; doi:10.3389/fmicb.2020.00856)
Supplement: DATA SHEET S4 — X-ray crystallographic data (CIFs) of 1, 4, and 8. [file Data_Sheet_4.ZIP › 1.cif]

data_3-38-1
_audit_creation_date               2019-05-07
_audit_creation_method
;
Olex2 1.2
(compiled 2018.05.29 svn.r3508 for OlexSys, GUI svn.r5506)
;
_shelx_SHELXL_version_number       '2014/7'
_audit_contact_author_address      ?
_audit_contact_author_email        ?
_audit_contact_author_name         ''
_audit_contact_author_phone        ?
_publ_contact_author_id_orcid      ?
_publ_section_references
;
Dolomanov, O.V., Bourhis, L.J., Gildea, R.J, Howard, J.A.K. & Puschmann, H.
 (2009), J. Appl. Cryst. 42, 339-341.

Sheldrick, G.M. (2008). Acta Cryst. A64, 112-122.
;
_chemical_name_common              ?
_chemical_name_systematic          ?
_chemical_formula_moiety           'C25 H38 O3'
_chemical_formula_sum              'C25 H38 O3'
_chemical_formula_weight           386.55
_chemical_absolute_configuration   ad
_chemical_melting_point            ?
loop_
  _atom_type_symbol
  _atom_type_description
  _atom_type_scat_dispersion_real
  _atom_type_scat_dispersion_imag
  _atom_type_scat_source
 'C' 'C' 0.0181 0.0091 'International Tables Vol C Tables 4.2.6.8 and 6.1.1.4'
 'H' 'H' 0.0000 0.0000 'International Tables Vol C Tables 4.2.6.8 and 6.1.1.4'
 'O' 'O' 0.0492 0.0322 'International Tables Vol C Tables 4.2.6.8 and 6.1.1.4'

_shelx_space_group_comment
;
The symmetry employed for this shelxl refinement is uniquely defined
by the following loop, which should always be used as a source of
symmetry information in preference to the above space-group names.
They are only intended as comments.
;
_space_group_crystal_system        'orthorhombic'
_space_group_IT_number             19
_space_group_name_H-M_alt          'P 21 21 21'
_space_group_name_Hall             'P 2ac 2ab'
loop_
  _space_group_symop_operation_xyz
 'x, y, z'
 '-x+1/2, -y, z+1/2'
 'x+1/2, -y+1/2, -z'
 '-x, y+1/2, -z+1/2'

_cell_length_a                     5.92122(10)
_cell_length_b                     15.67980(10)
_cell_length_c                     26.2277(2)
_cell_angle_alpha                  90
_cell_angle_beta                   90
_cell_angle_gamma                  90
_cell_volume                       2435.07(5)
_cell_formula_units_Z              4
_cell_measurement_reflns_used      20448
_cell_measurement_temperature      100(1)
_cell_measurement_theta_max        73.4660
_cell_measurement_theta_min        3.3690
_shelx_estimated_absorpt_T_max     0.950
_shelx_estimated_absorpt_T_min     0.903
_exptl_absorpt_coefficient_mu      0.523
_exptl_absorpt_correction_T_max    1.00000
_exptl_absorpt_correction_T_min    0.87804
_exptl_absorpt_correction_type     multi-scan
_exptl_absorpt_process_details
;
CrysAlisPro 1.171.39.28b (Rigaku Oxford Diffraction, 2015)
Empirical absorption correction using spherical harmonics,
 implemented in SCALE3 ABSPACK scaling algorithm.
;
_exptl_absorpt_special_details     ?
_exptl_crystal_colour              colourless
_exptl_crystal_colour_primary      colourless
_exptl_crystal_density_diffrn      1.054
_exptl_crystal_density_meas        ?
_exptl_crystal_density_method      ?
_exptl_crystal_description         needle
_exptl_crystal_F_000               848
_exptl_crystal_size_max            0.4
_exptl_crystal_size_mid            0.12
_exptl_crystal_size_min            0.08
_exptl_transmission_factor_max     ?
_exptl_transmission_factor_min     ?
_diffrn_reflns_av_R_equivalents    0.0218
_diffrn_reflns_av_unetI/netI       0.0143
_diffrn_reflns_Laue_measured_fraction_full  0.998
_diffrn_reflns_Laue_measured_fraction_max  0.990
_diffrn_reflns_limit_h_max         7
_diffrn_reflns_limit_h_min         -3
_diffrn_reflns_limit_k_max         19
_diffrn_reflns_limit_k_min         -19
_diffrn_reflns_limit_l_max         32
_diffrn_reflns_limit_l_min         -32
_diffrn_reflns_number              24079
_diffrn_reflns_point_group_measured_fraction_full  0.997
_diffrn_reflns_point_group_measured_fraction_max  0.981
_diffrn_reflns_theta_full          67.684
_diffrn_reflns_theta_max           73.931
_diffrn_reflns_theta_min           3.284
_diffrn_ambient_environment        N~2~
_diffrn_ambient_temperature        100(1)
_diffrn_detector                   'CCD plate'
_diffrn_detector_area_resol_mean   ?
_diffrn_measured_fraction_theta_full  0.998
_diffrn_measured_fraction_theta_max  0.990
_diffrn_measurement_details
;
List of Runs (angles in degrees, time in seconds):

  # Type    Start    End  Width  t~exp~   \w     \q     \k     \f   Frames
--------------------------------------------------------------------------
  1  \w     41.00  84.00   0.50    0.50    --    0.00  57.00 -90.00   86
  2  \w     26.00  87.00   0.50    0.50    --    0.00  57.00 -30.00  122
  3  \w    -17.00  25.00   0.50    0.50    --    0.00  57.00 -30.00   84
  4  \w    -20.00  16.00   0.50    0.50    --    0.00  57.00 -90.00   72
  5  \w    -38.00 -12.00   0.50    0.50    --    0.00 -77.00 -90.00   52
  6  \w      1.00  28.00   0.50    0.50    --    0.00 -77.00 -90.00   54
  7  \w    -24.00  15.00   0.50    0.50    --    0.00 -82.00 -30.00   78
  8  \w     73.00 112.00   0.50    0.50    --   94.60 -61.00  90.00   78
  9  \w     20.00  49.00   0.50    0.50    --   94.60 -61.00  90.00   58
 10  \w      5.00 109.00   0.50    0.50    --   94.60 -30.00-150.00  208
 11  \w     38.00 103.00   0.50    0.50    --   94.60 -82.00  90.00  130
 12  \w     12.00  73.00   0.50    0.50    --   94.60 -45.00  30.00  122
 13  \w     11.00 115.00   0.50    0.50    --   94.60 -61.00 150.00  208
 14  \w     24.00  50.00   0.50    0.50    --   94.60 -82.00  60.00   52
 15  \w     38.00 118.00   0.50    0.50    --   94.60 -61.00 -30.00  160
 16  \w     90.00 125.00   0.50    0.50    --   94.60 -82.00-150.00   70
 17  \w     74.00 118.00   0.50    0.50    --   94.60 -15.00 150.00   88
 18  \w     82.00 107.00   0.50    0.50    --   94.60 -82.00  60.00   50
 19  \w     15.00  55.00   0.50    0.50    --   94.60 -15.00 150.00   80
 20  \w     41.00 102.00   0.50    0.50    --   94.60 -82.00 -30.00  122
 21  \w      8.00  36.00   0.50    0.50    --   94.60 -82.00-180.00   56
 22  \w     84.00 119.00   0.50    0.50    --   94.60 -82.00-180.00   70
 23  \w      5.00 117.00   0.50    0.50    --   94.60 -15.00 -90.00  224
 24  \w     12.00 122.00   0.50    0.50    --   94.60 -82.00 120.00  220
;
_diffrn_measurement_device         'four-circle diffractometer'
_diffrn_measurement_device_type    'XtaLAB AFC12 (RINC): Kappa single'
_diffrn_measurement_method         '\w scans'
_diffrn_orient_matrix_type        
 'CrysAlisPro convention (1999,Acta A55,543-557)'
_diffrn_orient_matrix_UB_11        -0.0292643000
_diffrn_orient_matrix_UB_12        -0.0631471000
_diffrn_orient_matrix_UB_13        0.0445156000
_diffrn_orient_matrix_UB_21        0.0137442000
_diffrn_orient_matrix_UB_22        -0.0752048000
_diffrn_orient_matrix_UB_23        -0.0376714000
_diffrn_orient_matrix_UB_31        0.2581466000
_diffrn_orient_matrix_UB_32        -0.0031511000
_diffrn_orient_matrix_UB_33        0.0070538000
_diffrn_radiation_monochromator    graphite
_diffrn_radiation_probe            x-ray
_diffrn_radiation_type             CuK\a
_diffrn_radiation_wavelength       1.54184
_diffrn_source                     'fine-focus sealed X-ray tube'
_diffrn_source_type                'Enhance (Cu) X-ray Source'
_reflns_Friedel_coverage           0.714
_reflns_Friedel_fraction_full      0.997
_reflns_Friedel_fraction_max       0.970
_reflns_number_gt                  4802
_reflns_number_total               4861
_reflns_odcompleteness_completeness  99.65
_reflns_odcompleteness_iscentric   1
_reflns_odcompleteness_theta       66.97
_reflns_special_details
;
 Reflections were merged by SHELXL according to the crystal
 class for the calculation of statistics and refinement.
 
 Structure factors included contributions from the .fab file.
 
 _reflns_Friedel_fraction is defined as the number of unique
 Friedel pairs measured divided by the number that would be
 possible theoretically, ignoring centric projections and
 systematic absences.
;
_reflns_threshold_expression       'I > 2\s(I)'
_computing_cell_refinement         'CrysAlisPro 1.171.39.28b (Rigaku OD, 2015)'
_computing_data_collection         'CrysAlisPro 1.171.39.28b (Rigaku OD, 2015)'
_computing_data_reduction          'CrysAlisPro 1.171.39.28b (Rigaku OD, 2015)'
_computing_molecular_graphics      'Olex2 (Dolomanov et al., 2009)'
_computing_publication_material    'Olex2 (Dolomanov et al., 2009)'
_computing_structure_refinement    'XL (Sheldrick, 2008)'
_computing_structure_solution      'ShelXS (Sheldrick, 2008)'
_refine_diff_density_max           0.220
_refine_diff_density_min           -0.187
_refine_diff_density_rms           0.039
_refine_ls_abs_structure_details
;
 Flack x determined using 1997 quotients [(I+)-(I-)]/[(I+)+(I-)]
 (Parsons, Flack and Wagner, Acta Cryst. B69 (2013) 249-259).
;
_refine_ls_abs_structure_Flack     0.08(3)
_refine_ls_extinction_coef         .
_refine_ls_extinction_method       none
_refine_ls_goodness_of_fit_ref     1.032
_refine_ls_hydrogen_treatment      constr
_refine_ls_matrix_type             full
_refine_ls_number_parameters       260
_refine_ls_number_reflns           4861
_refine_ls_number_restraints       0
_refine_ls_R_factor_all            0.0296
_refine_ls_R_factor_gt             0.0293
_refine_ls_restrained_S_all        1.032
_refine_ls_shift/su_max            0.000
_refine_ls_shift/su_mean           0.000
_refine_ls_structure_factor_coef   Fsqd
_refine_ls_weighting_details      
 'w=1/[\s^2^(Fo^2^)+(0.0474P)^2^+0.4575P] where P=(Fo^2^+2Fc^2^)/3'
_refine_ls_weighting_scheme        calc
_refine_ls_wR_factor_gt            0.0772
_refine_ls_wR_factor_ref           0.0774
_refine_special_details            ?
_olex2_refinement_description
;
1. Fixed Uiso
 At 1.2 times of:
  All C(H) groups, All C(H,H) groups
 At 1.5 times of:
  All C(H,H,H) groups, All O(H) groups
2.a Ternary CH refined with riding coordinates:
 C2(H2), C6(H6), C10(H10), C14(H14), C15(H15)
2.b Secondary CH2 refined with riding coordinates:
 C1(H1A,H1B), C9(H9A,H9B), C12(H12A,H12B), C13(H13A,H13B), C16(H16A,H16B),
 C21(H21A,H21B)
2.c Aromatic/amide H refined with riding coordinates:
 C4(H4), C8(H8), C17(H17), C18(H18)
2.d Idealised Me refined as rotating group:
 C20(H20A,H20B,H20C), C22(H22A,H22B,H22C), C23(H23A,H23B,H23C), C24(H24A,H24B,
 H24C), C25(H25A,H25B,H25C)
2.e Idealised tetrahedral OH refined as rotating group:
 O2(H2A), O3(H3)
;
_atom_sites_solution_hydrogens     geom
_atom_sites_solution_primary       direct
_atom_sites_solution_secondary     ?
loop_
  _atom_site_label
  _atom_site_type_symbol
  _atom_site_fract_x
  _atom_site_fract_y
  _atom_site_fract_z
  _atom_site_U_iso_or_equiv
  _atom_site_adp_type
  _atom_site_occupancy
  _atom_site_site_symmetry_order
  _atom_site_calc_flag
  _atom_site_refinement_flags_posn
  _atom_site_refinement_flags_adp
  _atom_site_refinement_flags_occupancy
  _atom_site_disorder_assembly
  _atom_site_disorder_group
 C1 C 0.4325(2) 0.03774(8) -0.15000(5) 0.0155(3) Uani 1 1 d . . . . .
 H1A H 0.2806 0.0390 -0.1638 0.019 Uiso 1 1 calc R . . . .
 H1B H 0.5131 -0.0078 -0.1672 0.019 Uiso 1 1 calc R . . . .
 C2 C 0.4168(2) 0.01498(8) -0.09322(5) 0.0164(3) Uani 1 1 d . . . . .
 H2 H 0.5703 0.0105 -0.0795 0.020 Uiso 1 1 calc R . . . .
 C3 C 0.2953(3) -0.06861(10) -0.08351(6) 0.0230(3) Uani 1 1 d . . . . .
 C4 C 0.1321(3) -0.06124(10) -0.04831(6) 0.0237(3) Uani 1 1 d . . . . .
 H4 H 0.0386 -0.1054 -0.0376 0.028 Uiso 1 1 calc R . . . .
 C5 C 0.1226(2) 0.02578(9) -0.02930(5) 0.0182(3) Uani 1 1 d . . . . .
 C6 C 0.2838(2) 0.07989(9) -0.06073(5) 0.0140(3) Uani 1 1 d . . . . .
 H6 H 0.2030 0.1086 -0.0813 0.017 Uiso 1 1 calc R . . . .
 C7 C 0.4259(2) 0.14363(9) -0.03142(5) 0.0153(3) Uani 1 1 d . . . . .
 C8 C 0.5133(2) 0.21491(9) -0.05099(5) 0.0164(3) Uani 1 1 d . . . . .
 H8 H 0.6029 0.2454 -0.0282 0.020 Uiso 1 1 calc R . . . .
 C9 C 0.4944(3) 0.25575(9) -0.10320(5) 0.0161(3) Uani 1 1 d . . . . .
 H9A H 0.6438 0.2757 -0.1126 0.019 Uiso 1 1 calc R . . . .
 H9B H 0.3993 0.3058 -0.0997 0.019 Uiso 1 1 calc R . . . .
 C10 C 0.4027(2) 0.20332(8) -0.14818(5) 0.0133(3) Uani 1 1 d . . . . .
 H10 H 0.2726 0.1854 -0.1397 0.016 Uiso 1 1 calc R . . . .
 C11 C 0.5486(2) 0.12273(9) -0.16337(5) 0.0150(3) Uani 1 1 d . . . . .
 C12 C 0.5734(3) 0.13053(9) -0.22205(5) 0.0180(3) Uani 1 1 d . . . . .
 H12A H 0.7142 0.1053 -0.2335 0.022 Uiso 1 1 calc R . . . .
 H12B H 0.4490 0.1024 -0.2393 0.022 Uiso 1 1 calc R . . . .
 C13 C 0.5705(3) 0.22610(9) -0.23246(5) 0.0189(3) Uani 1 1 d . . . . .
 H13A H 0.5424 0.2381 -0.2682 0.023 Uiso 1 1 calc R . . . .
 H13B H 0.7112 0.2528 -0.2223 0.023 Uiso 1 1 calc R . . . .
 C14 C 0.3739(3) 0.25549(8) -0.19899(5) 0.0154(3) Uani 1 1 d . . . . .
 H14 H 0.2371 0.2331 -0.2152 0.019 Uiso 1 1 calc R . . . .
 C15 C 0.3364(3) 0.35201(9) -0.19374(5) 0.0179(3) Uani 1 1 d . . . . .
 H15 H 0.4506 0.3749 -0.1704 0.021 Uiso 1 1 calc R . . . .
 C16 C 0.1008(3) 0.36956(9) -0.17110(6) 0.0188(3) Uani 1 1 d . . . . .
 H16A H -0.0111 0.3618 -0.1977 0.023 Uiso 1 1 calc R . . . .
 H16B H 0.0708 0.3276 -0.1448 0.023 Uiso 1 1 calc R . . . .
 C17 C 0.0723(3) 0.45686(9) -0.14869(5) 0.0179(3) Uani 1 1 d . . . . .
 H17 H 0.1788 0.4743 -0.1248 0.021 Uiso 1 1 calc R . . . .
 C18 C -0.0915(3) 0.51137(9) -0.15992(6) 0.0191(3) Uani 1 1 d . . . . .
 H18 H -0.1880 0.4967 -0.1865 0.023 Uiso 1 1 calc R . . . .
 C19 C -0.1349(3) 0.59556(9) -0.13317(6) 0.0195(3) Uani 1 1 d . . . . .
 C20 C 0.3639(4) -0.14904(10) -0.10998(7) 0.0375(5) Uani 1 1 d . . . . .
 H20A H 0.3431 -0.1425 -0.1461 0.056 Uiso 1 1 calc GR . . . .
 H20B H 0.2726 -0.1954 -0.0979 0.056 Uiso 1 1 calc GR . . . .
 H20C H 0.5199 -0.1608 -0.1029 0.056 Uiso 1 1 calc GR . . . .
 C21 C 0.4793(3) 0.11819(9) 0.02278(5) 0.0187(3) Uani 1 1 d . . . . .
 H21A H 0.5954 0.1555 0.0363 0.022 Uiso 1 1 calc R . . . .
 H21B H 0.3453 0.1245 0.0437 0.022 Uiso 1 1 calc R . . . .
 C22 C 0.7874(2) 0.12406(10) -0.14088(6) 0.0206(3) Uani 1 1 d . . . . .
 H22A H 0.7784 0.1275 -0.1044 0.031 Uiso 1 1 calc GR . . . .
 H22B H 0.8678 0.1727 -0.1537 0.031 Uiso 1 1 calc GR . . . .
 H22C H 0.8656 0.0729 -0.1504 0.031 Uiso 1 1 calc GR . . . .
 C23 C 0.3595(4) 0.39715(10) -0.24492(6) 0.0306(4) Uani 1 1 d . . . . .
 H23A H 0.5127 0.3929 -0.2566 0.046 Uiso 1 1 calc GR . . . .
 H23B H 0.3196 0.4561 -0.2411 0.046 Uiso 1 1 calc GR . . . .
 H23C H 0.2607 0.3709 -0.2693 0.046 Uiso 1 1 calc GR . . . .
 C24 C -0.0756(3) 0.67046(10) -0.16799(6) 0.0265(3) Uani 1 1 d . . . . .
 H24A H 0.0824 0.6685 -0.1762 0.040 Uiso 1 1 calc GR . . . .
 H24B H -0.1092 0.7231 -0.1509 0.040 Uiso 1 1 calc GR . . . .
 H24C H -0.1626 0.6668 -0.1988 0.040 Uiso 1 1 calc GR . . . .
 C25 C -0.3816(3) 0.59950(11) -0.11689(8) 0.0340(4) Uani 1 1 d . . . . .
 H25A H -0.4767 0.5949 -0.1464 0.051 Uiso 1 1 calc GR . . . .
 H25B H -0.4102 0.6528 -0.1001 0.051 Uiso 1 1 calc GR . . . .
 H25C H -0.4134 0.5533 -0.0939 0.051 Uiso 1 1 calc GR . . . .
 O1 O -0.00006(19) 0.05429(7) 0.00440(4) 0.0240(2) Uani 1 1 d . . . . .
 O2 O 0.55567(17) 0.03165(7) 0.02478(4) 0.0197(2) Uani 1 1 d . . . . .
 H2A H 0.6891 0.0295 0.0165 0.029 Uiso 1 1 calc GR . . . .
 O3 O 0.0079(2) 0.60506(6) -0.08956(4) 0.0241(2) Uani 1 1 d . . . . .
 H3 H -0.0056 0.5633 -0.0710 0.036 Uiso 1 1 calc GR . . . .

loop_
  _atom_site_aniso_label
  _atom_site_aniso_U_11
  _atom_site_aniso_U_22
  _atom_site_aniso_U_33
  _atom_site_aniso_U_23
  _atom_site_aniso_U_13
  _atom_site_aniso_U_12
 C1 0.0186(7) 0.0117(6) 0.0163(6) -0.0020(5) 0.0009(5) 0.0010(5)
 C2 0.0187(6) 0.0135(6) 0.0170(6) -0.0002(5) -0.0004(5) 0.0010(5)
 C3 0.0341(8) 0.0147(7) 0.0203(7) 0.0023(6) -0.0010(6) -0.0019(6)
 C4 0.0289(8) 0.0177(7) 0.0244(7) 0.0046(6) 0.0009(6) -0.0062(6)
 C5 0.0160(6) 0.0195(7) 0.0190(6) 0.0051(5) -0.0017(5) -0.0006(6)
 C6 0.0136(6) 0.0136(6) 0.0148(6) 0.0018(5) -0.0006(5) 0.0003(5)
 C7 0.0145(6) 0.0168(6) 0.0146(6) -0.0023(5) 0.0004(5) 0.0019(5)
 C8 0.0185(7) 0.0175(6) 0.0132(6) -0.0037(5) -0.0026(5) -0.0019(5)
 C9 0.0203(7) 0.0130(6) 0.0150(6) -0.0010(5) 0.0008(5) -0.0032(5)
 C10 0.0137(6) 0.0122(6) 0.0139(6) 0.0004(5) 0.0007(5) -0.0013(5)
 C11 0.0157(7) 0.0141(6) 0.0153(6) -0.0010(5) 0.0012(5) 0.0002(5)
 C12 0.0208(7) 0.0167(7) 0.0164(6) -0.0017(5) 0.0033(5) 0.0008(6)
 C13 0.0254(7) 0.0159(6) 0.0155(6) -0.0008(5) 0.0046(6) -0.0019(6)
 C14 0.0199(7) 0.0125(6) 0.0138(6) 0.0002(5) 0.0006(5) -0.0012(5)
 C15 0.0249(7) 0.0125(6) 0.0162(6) 0.0012(5) 0.0027(6) -0.0012(5)
 C16 0.0227(7) 0.0125(6) 0.0211(7) 0.0009(5) -0.0010(6) 0.0009(6)
 C17 0.0217(7) 0.0151(6) 0.0168(6) 0.0001(5) -0.0002(5) 0.0001(5)
 C18 0.0226(7) 0.0158(7) 0.0188(7) -0.0004(5) -0.0043(6) -0.0008(6)
 C19 0.0246(8) 0.0143(6) 0.0197(6) 0.0008(5) -0.0018(6) 0.0021(6)
 C20 0.0664(13) 0.0142(7) 0.0318(9) -0.0006(6) 0.0111(9) -0.0025(8)
 C21 0.0222(7) 0.0191(7) 0.0149(6) 0.0004(5) -0.0012(6) 0.0000(6)
 C22 0.0145(7) 0.0228(7) 0.0244(7) -0.0006(6) 0.0007(6) 0.0009(6)
 C23 0.0518(11) 0.0174(7) 0.0225(8) 0.0064(6) 0.0097(8) 0.0031(7)
 C24 0.0376(9) 0.0173(7) 0.0246(7) 0.0040(6) -0.0035(7) 0.0004(7)
 C25 0.0288(9) 0.0261(8) 0.0471(10) -0.0006(7) 0.0079(8) 0.0049(7)
 O1 0.0189(5) 0.0270(6) 0.0259(5) 0.0043(4) 0.0068(4) 0.0006(4)
 O2 0.0169(5) 0.0223(5) 0.0197(5) 0.0060(4) 0.0019(4) 0.0015(4)
 O3 0.0395(6) 0.0147(5) 0.0179(5) -0.0002(4) -0.0057(5) -0.0011(5)

_geom_special_details
;
 All esds (except the esd in the dihedral angle between two l.s. planes)
 are estimated using the full covariance matrix.  The cell esds are taken
 into account individually in the estimation of esds in distances, angles
 and torsion angles; correlations between esds in cell parameters are only
 used when they are defined by crystal symmetry.  An approximate (isotropic)
 treatment of cell esds is used for estimating esds involving l.s. planes.
;
loop_
  _geom_bond_atom_site_label_1
  _geom_bond_atom_site_label_2
  _geom_bond_distance
  _geom_bond_site_symmetry_2
  _geom_bond_publ_flag
 C1 H1A 0.9700 . ?
 C1 H1B 0.9700 . ?
 C1 C2 1.5343(19) . ?
 C1 C11 1.5399(18) . ?
 C2 H2 0.9800 . ?
 C2 C3 1.517(2) . ?
 C2 C6 1.5432(18) . ?
 C3 C4 1.341(2) . ?
 C3 C20 1.496(2) . ?
 C4 H4 0.9300 . ?
 C4 C5 1.454(2) . ?
 C5 C6 1.5203(19) . ?
 C5 O1 1.2282(19) . ?
 C6 H6 0.8500 . ?
 C6 C7 1.5157(19) . ?
 C7 C8 1.334(2) . ?
 C7 C21 1.5099(18) . ?
 C8 H8 0.9300 . ?
 C8 C9 1.5157(18) . ?
 C9 H9A 0.9700 . ?
 C9 H9B 0.9700 . ?
 C9 C10 1.5370(17) . ?
 C10 H10 0.8500 . ?
 C10 C11 1.5815(18) . ?
 C10 C14 1.5731(18) . ?
 C11 C12 1.5509(18) . ?
 C11 C22 1.5325(19) . ?
 C12 H12A 0.9700 . ?
 C12 H12B 0.9700 . ?
 C12 C13 1.5234(19) . ?
 C13 H13A 0.9700 . ?
 C13 H13B 0.9700 . ?
 C13 C14 1.5290(19) . ?
 C14 H14 0.9800 . ?
 C14 C15 1.5358(18) . ?
 C15 H15 0.9800 . ?
 C15 C16 1.541(2) . ?
 C15 C23 1.524(2) . ?
 C16 H16A 0.9700 . ?
 C16 H16B 0.9700 . ?
 C16 C17 1.4992(19) . ?
 C17 H17 0.9300 . ?
 C17 C18 1.326(2) . ?
 C18 H18 0.9300 . ?
 C18 C19 1.5168(19) . ?
 C19 C24 1.529(2) . ?
 C19 C25 1.523(2) . ?
 C19 O3 1.4304(18) . ?
 C20 H20A 0.9600 . ?
 C20 H20B 0.9600 . ?
 C20 H20C 0.9600 . ?
 C21 H21A 0.9700 . ?
 C21 H21B 0.9700 . ?
 C21 O2 1.4312(18) . ?
 C22 H22A 0.9600 . ?
 C22 H22B 0.9600 . ?
 C22 H22C 0.9600 . ?
 C23 H23A 0.9600 . ?
 C23 H23B 0.9600 . ?
 C23 H23C 0.9600 . ?
 C24 H24A 0.9600 . ?
 C24 H24B 0.9600 . ?
 C24 H24C 0.9600 . ?
 C25 H25A 0.9600 . ?
 C25 H25B 0.9600 . ?
 C25 H25C 0.9600 . ?
 O2 H2A 0.8200 . ?
 O3 H3 0.8200 . ?

loop_
  _geom_angle_atom_site_label_1
  _geom_angle_atom_site_label_2
  _geom_angle_atom_site_label_3
  _geom_angle
  _geom_angle_site_symmetry_1
  _geom_angle_site_symmetry_3
  _geom_angle_publ_flag
 H1A C1 H1B 107.3 . . ?
 C2 C1 H1A 108.1 . . ?
 C2 C1 H1B 108.1 . . ?
 C2 C1 C11 116.70(11) . . ?
 C11 C1 H1A 108.1 . . ?
 C11 C1 H1B 108.1 . . ?
 C1 C2 H2 108.5 . . ?
 C1 C2 C6 114.42(11) . . ?
 C3 C2 C1 113.12(11) . . ?
 C3 C2 H2 108.5 . . ?
 C3 C2 C6 103.61(11) . . ?
 C6 C2 H2 108.5 . . ?
 C4 C3 C2 112.51(13) . . ?
 C4 C3 C20 125.99(15) . . ?
 C20 C3 C2 121.45(14) . . ?
 C3 C4 H4 124.9 . . ?
 C3 C4 C5 110.17(13) . . ?
 C5 C4 H4 124.9 . . ?
 C4 C5 C6 108.26(12) . . ?
 O1 C5 C4 127.69(14) . . ?
 O1 C5 C6 123.95(13) . . ?
 C2 C6 H6 106.6 . . ?
 C5 C6 C2 104.58(11) . . ?
 C5 C6 H6 106.6 . . ?
 C7 C6 C2 115.58(11) . . ?
 C7 C6 C5 116.20(12) . . ?
 C7 C6 H6 106.6 . . ?
 C8 C7 C6 124.92(12) . . ?
 C8 C7 C21 120.14(12) . . ?
 C21 C7 C6 114.81(12) . . ?
 C7 C8 H8 113.9 . . ?
 C7 C8 C9 132.28(13) . . ?
 C9 C8 H8 113.9 . . ?
 C8 C9 H9A 107.4 . . ?
 C8 C9 H9B 107.4 . . ?
 C8 C9 C10 119.57(11) . . ?
 H9A C9 H9B 107.0 . . ?
 C10 C9 H9A 107.4 . . ?
 C10 C9 H9B 107.4 . . ?
 C9 C10 H10 107.2 . . ?
 C9 C10 C11 115.33(11) . . ?
 C9 C10 C14 114.23(10) . . ?
 C11 C10 H10 107.2 . . ?
 C14 C10 H10 107.2 . . ?
 C14 C10 C11 105.14(10) . . ?
 C1 C11 C10 112.98(11) . . ?
 C1 C11 C12 109.66(11) . . ?
 C12 C11 C10 103.81(11) . . ?
 C22 C11 C1 109.63(11) . . ?
 C22 C11 C10 113.33(11) . . ?
 C22 C11 C12 107.08(11) . . ?
 C11 C12 H12A 110.8 . . ?
 C11 C12 H12B 110.8 . . ?
 H12A C12 H12B 108.9 . . ?
 C13 C12 C11 104.73(11) . . ?
 C13 C12 H12A 110.8 . . ?
 C13 C12 H12B 110.8 . . ?
 C12 C13 H13A 111.4 . . ?
 C12 C13 H13B 111.4 . . ?
 C12 C13 C14 101.65(11) . . ?
 H13A C13 H13B 109.3 . . ?
 C14 C13 H13A 111.4 . . ?
 C14 C13 H13B 111.4 . . ?
 C10 C14 H14 105.8 . . ?
 C13 C14 C10 104.31(11) . . ?
 C13 C14 H14 105.8 . . ?
 C13 C14 C15 117.29(12) . . ?
 C15 C14 C10 116.88(11) . . ?
 C15 C14 H14 105.8 . . ?
 C14 C15 H15 108.5 . . ?
 C14 C15 C16 109.96(12) . . ?
 C16 C15 H15 108.5 . . ?
 C23 C15 C14 111.46(12) . . ?
 C23 C15 H15 108.5 . . ?
 C23 C15 C16 109.74(13) . . ?
 C15 C16 H16A 108.6 . . ?
 C15 C16 H16B 108.6 . . ?
 H16A C16 H16B 107.6 . . ?
 C17 C16 C15 114.60(12) . . ?
 C17 C16 H16A 108.6 . . ?
 C17 C16 H16B 108.6 . . ?
 C16 C17 H17 117.1 . . ?
 C18 C17 C16 125.74(14) . . ?
 C18 C17 H17 117.1 . . ?
 C17 C18 H18 117.2 . . ?
 C17 C18 C19 125.62(14) . . ?
 C19 C18 H18 117.2 . . ?
 C18 C19 C24 110.69(12) . . ?
 C18 C19 C25 109.13(13) . . ?
 C25 C19 C24 110.90(14) . . ?
 O3 C19 C18 111.12(12) . . ?
 O3 C19 C24 105.18(12) . . ?
 O3 C19 C25 109.79(13) . . ?
 C3 C20 H20A 109.5 . . ?
 C3 C20 H20B 109.5 . . ?
 C3 C20 H20C 109.5 . . ?
 H20A C20 H20B 109.5 . . ?
 H20A C20 H20C 109.5 . . ?
 H20B C20 H20C 109.5 . . ?
 C7 C21 H21A 109.5 . . ?
 C7 C21 H21B 109.5 . . ?
 H21A C21 H21B 108.1 . . ?
 O2 C21 C7 110.56(11) . . ?
 O2 C21 H21A 109.5 . . ?
 O2 C21 H21B 109.5 . . ?
 C11 C22 H22A 109.5 . . ?
 C11 C22 H22B 109.5 . . ?
 C11 C22 H22C 109.5 . . ?
 H22A C22 H22B 109.5 . . ?
 H22A C22 H22C 109.5 . . ?
 H22B C22 H22C 109.5 . . ?
 C15 C23 H23A 109.5 . . ?
 C15 C23 H23B 109.5 . . ?
 C15 C23 H23C 109.5 . . ?
 H23A C23 H23B 109.5 . . ?
 H23A C23 H23C 109.5 . . ?
 H23B C23 H23C 109.5 . . ?
 C19 C24 H24A 109.5 . . ?
 C19 C24 H24B 109.5 . . ?
 C19 C24 H24C 109.5 . . ?
 H24A C24 H24B 109.5 . . ?
 H24A C24 H24C 109.5 . . ?
 H24B C24 H24C 109.5 . . ?
 C19 C25 H25A 109.5 . . ?
 C19 C25 H25B 109.5 . . ?
 C19 C25 H25C 109.5 . . ?
 H25A C25 H25B 109.5 . . ?
 H25A C25 H25C 109.5 . . ?
 H25B C25 H25C 109.5 . . ?
 C21 O2 H2A 109.5 . . ?
 C19 O3 H3 109.5 . . ?

loop_
  _geom_hbond_atom_site_label_D
  _geom_hbond_atom_site_label_H
  _geom_hbond_atom_site_label_A
  _geom_hbond_distance_DH
  _geom_hbond_distance_HA
  _geom_hbond_distance_DA
  _geom_hbond_angle_DHA
  _geom_hbond_site_symmetry_A
 O2 H2A O1 0.82 1.91 2.7077(15) 164.9 1_655
 O3 H3 O2 0.82 1.95 2.7497(14) 163.5 3_455

loop_
  _geom_torsion_atom_site_label_1
  _geom_torsion_atom_site_label_2
  _geom_torsion_atom_site_label_3
  _geom_torsion_atom_site_label_4
  _geom_torsion
  _geom_torsion_site_symmetry_1
  _geom_torsion_site_symmetry_2
  _geom_torsion_site_symmetry_3
  _geom_torsion_site_symmetry_4
  _geom_torsion_publ_flag
 C1 C2 C3 C4 -129.59(14) . . . . ?
 C1 C2 C3 C20 52.7(2) . . . . ?
 C1 C2 C6 C5 132.05(12) . . . . ?
 C1 C2 C6 C7 -98.88(14) . . . . ?
 C1 C11 C12 C13 151.67(12) . . . . ?
 C2 C1 C11 C10 -71.03(15) . . . . ?
 C2 C1 C11 C12 173.70(12) . . . . ?
 C2 C1 C11 C22 56.41(15) . . . . ?
 C2 C3 C4 C5 -0.72(19) . . . . ?
 C2 C6 C7 C8 81.85(17) . . . . ?
 C2 C6 C7 C21 -94.03(14) . . . . ?
 C3 C2 C6 C5 8.43(14) . . . . ?
 C3 C2 C6 C7 137.50(12) . . . . ?
 C3 C4 C5 C6 6.48(17) . . . . ?
 C3 C4 C5 O1 -176.96(15) . . . . ?
 C4 C5 C6 C2 -9.27(15) . . . . ?
 C4 C5 C6 C7 -137.97(13) . . . . ?
 C5 C6 C7 C8 -155.02(14) . . . . ?
 C5 C6 C7 C21 29.10(17) . . . . ?
 C6 C2 C3 C4 -5.12(17) . . . . ?
 C6 C2 C3 C20 177.13(15) . . . . ?
 C6 C7 C8 C9 3.2(2) . . . . ?
 C6 C7 C21 O2 47.09(16) . . . . ?
 C7 C8 C9 C10 -14.9(2) . . . . ?
 C8 C7 C21 O2 -129.00(14) . . . . ?
 C8 C9 C10 C11 -62.65(17) . . . . ?
 C8 C9 C10 C14 175.35(12) . . . . ?
 C9 C10 C11 C1 109.57(13) . . . . ?
 C9 C10 C11 C12 -131.70(12) . . . . ?
 C9 C10 C11 C22 -15.90(16) . . . . ?
 C9 C10 C14 C13 105.18(13) . . . . ?
 C9 C10 C14 C15 -26.11(18) . . . . ?
 C10 C11 C12 C13 30.69(14) . . . . ?
 C10 C14 C15 C16 -69.77(16) . . . . ?
 C10 C14 C15 C23 168.30(13) . . . . ?
 C11 C1 C2 C3 178.63(12) . . . . ?
 C11 C1 C2 C6 60.28(16) . . . . ?
 C11 C10 C14 C13 -22.25(13) . . . . ?
 C11 C10 C14 C15 -153.53(12) . . . . ?
 C11 C12 C13 C14 -45.03(14) . . . . ?
 C12 C13 C14 C10 41.16(13) . . . . ?
 C12 C13 C14 C15 172.20(12) . . . . ?
 C13 C14 C15 C16 165.24(12) . . . . ?
 C13 C14 C15 C23 43.32(19) . . . . ?
 C14 C10 C11 C1 -123.67(12) . . . . ?
 C14 C10 C11 C12 -4.94(13) . . . . ?
 C14 C10 C11 C22 110.87(12) . . . . ?
 C14 C15 C16 C17 161.21(12) . . . . ?
 C15 C16 C17 C18 127.41(16) . . . . ?
 C16 C17 C18 C19 172.94(14) . . . . ?
 C17 C18 C19 C24 109.54(17) . . . . ?
 C17 C18 C19 C25 -128.14(17) . . . . ?
 C17 C18 C19 O3 -6.9(2) . . . . ?
 C20 C3 C4 C5 176.90(16) . . . . ?
 C21 C7 C8 C9 178.90(14) . . . . ?
 C22 C11 C12 C13 -89.45(14) . . . . ?
 C23 C15 C16 C17 -75.85(16) . . . . ?
 O1 C5 C6 C2 174.01(13) . . . . ?
 O1 C5 C6 C7 45.32(19) . . . . ?

_smtbx_masks_special_details       ?
loop_
  _smtbx_masks_void_nr
  _smtbx_masks_void_average_x
  _smtbx_masks_void_average_y
  _smtbx_masks_void_average_z
  _smtbx_masks_void_volume
  _smtbx_masks_void_count_electrons
  _smtbx_masks_void_content
 1 -0.013 -0.065 0.814 31.2 0.5 ?
 2 -0.781 0.250 0.500 87.1 25.1 ?
 3 0.013 0.435 0.686 31.2 0.5 ?
 4 -0.444 0.750 0.000 87.1 25.1 ?
 5 0.487 0.565 0.186 31.2 0.5 ?
 6 0.513 0.065 0.314 31.2 0.5 ?

_shelx_res_file
;
    3-38-1.res created by SHELXL-2014/7

TITL 20190424_LMT 3-38-1 in P212121 #19
REM reset to P212121 #19
CELL 1.54184 5.92122 15.6798 26.2277 90 90 90
ZERR 4 0.0001 0.0001 0.0002 0 0 0
LATT -1
SYMM 0.5-X,-Y,0.5+Z
SYMM 0.5+X,0.5-Y,-Z
SYMM -X,0.5+Y,0.5-Z
SFAC C H O
UNIT 100 152 12
EQIV $1 1+X,+Y,+Z
EQIV $2 -0.5+X,0.5-Y,-Z

L.S. 10
PLAN  10
SIZE 0.2 0.1 0.1
HTAB O2 O1_$1
HTAB O3 O2_$2
BOND $H
HTAB
CONF
ABIN
fmap 2
acta
REM <olex2.extras>
REM <HklSrc "%.\\3-38-1.hkl">
REM </olex2.extras>

WGHT    0.047400    0.457500
FVAR       6.90734
C1    1    0.432512    0.037737   -0.150001    11.00000    0.01859    0.01170 =
         0.01634   -0.00203    0.00093    0.00096
AFIX  23
H1A   2    0.280578    0.039015   -0.163809    11.00000   -1.20000
H1B   2    0.513095   -0.007765   -0.167230    11.00000   -1.20000
AFIX   0
C2    1    0.416797    0.014980   -0.093216    11.00000    0.01866    0.01353 =
         0.01705   -0.00015   -0.00035    0.00098
AFIX  13  0.9800
H2    2    0.570275    0.010545   -0.079486    11.00000   -1.20000
AFIX   0
C3    1    0.295276   -0.068605   -0.083510    11.00000    0.03408    0.01469 =
         0.02034    0.00226   -0.00101   -0.00187
C4    1    0.132125   -0.061243   -0.048313    11.00000    0.02894    0.01767 =
         0.02436    0.00464    0.00086   -0.00624
AFIX  43  0.9300
H4    2    0.038618   -0.105412   -0.037619    11.00000   -1.20000
AFIX   0
C5    1    0.122592    0.025783   -0.029296    11.00000    0.01601    0.01946 =
         0.01905    0.00514   -0.00172   -0.00060
C6    1    0.283847    0.079892   -0.060731    11.00000    0.01360    0.01356 =
         0.01479    0.00181   -0.00059    0.00030
AFIX  13  0.8500
H6    2    0.202996    0.108568   -0.081303    11.00000   -1.20000
AFIX   0
C7    1    0.425913    0.143630   -0.031422    11.00000    0.01451    0.01677 =
         0.01460   -0.00228    0.00042    0.00192
C8    1    0.513292    0.214913   -0.050989    11.00000    0.01855    0.01753 =
         0.01323   -0.00372   -0.00262   -0.00193
AFIX  43
H8    2    0.602868    0.245359   -0.028250    11.00000   -1.20000
AFIX   0
C9    1    0.494449    0.255745   -0.103197    11.00000    0.02028    0.01302 =
         0.01498   -0.00097    0.00076   -0.00322
AFIX  23
H9A   2    0.643754    0.275743   -0.112614    11.00000   -1.20000
H9B   2    0.399342    0.305779   -0.099722    11.00000   -1.20000
AFIX   0
C10   1    0.402722    0.203319   -0.148177    11.00000    0.01368    0.01223 =
         0.01392    0.00036    0.00075   -0.00131
AFIX  13  0.8500
H10   2    0.272615    0.185357   -0.139679    11.00000   -1.20000
AFIX   0
C11   1    0.548563    0.122732   -0.163371    11.00000    0.01567    0.01414 =
         0.01533   -0.00098    0.00118    0.00015
C12   1    0.573355    0.130527   -0.222054    11.00000    0.02076    0.01671 =
         0.01644   -0.00174    0.00332    0.00081
AFIX  23
H12A  2    0.714173    0.105317   -0.233454    11.00000   -1.20000
H12B  2    0.449033    0.102409   -0.239302    11.00000   -1.20000
AFIX   0
C13   1    0.570508    0.226104   -0.232462    11.00000    0.02536    0.01588 =
         0.01546   -0.00081    0.00463   -0.00188
AFIX  23
H13A  2    0.542390    0.238085   -0.268186    11.00000   -1.20000
H13B  2    0.711216    0.252795   -0.222261    11.00000   -1.20000
AFIX   0
C14   1    0.373926    0.255490   -0.198993    11.00000    0.01994    0.01253 =
         0.01384    0.00024    0.00059   -0.00116
AFIX  13  0.9800
H14   2    0.237127    0.233140   -0.215235    11.00000   -1.20000
AFIX   0
C15   1    0.336440    0.352009   -0.193740    11.00000    0.02494    0.01252 =
         0.01617    0.00118    0.00273   -0.00117
AFIX  13  0.9800
H15   2    0.450552    0.374943   -0.170406    11.00000   -1.20000
AFIX   0
C16   1    0.100837    0.369564   -0.171097    11.00000    0.02268    0.01252 =
         0.02115    0.00090   -0.00096    0.00093
AFIX  23
H16A  2   -0.011119    0.361818   -0.197696    11.00000   -1.20000
H16B  2    0.070819    0.327624   -0.144768    11.00000   -1.20000
AFIX   0
C17   1    0.072263    0.456859   -0.148686    11.00000    0.02169    0.01513 =
         0.01681    0.00009   -0.00020    0.00013
AFIX  43
H17   2    0.178766    0.474298   -0.124801    11.00000   -1.20000
AFIX   0
C18   1   -0.091453    0.511375   -0.159921    11.00000    0.02259    0.01577 =
         0.01882   -0.00045   -0.00432   -0.00078
AFIX  43
H18   2   -0.187982    0.496747   -0.186490    11.00000   -1.20000
AFIX   0
C19   1   -0.134894    0.595557   -0.133170    11.00000    0.02465    0.01430 =
         0.01967    0.00084   -0.00176    0.00207
C20   1    0.363884   -0.149036   -0.109980    11.00000    0.06638    0.01419 =
         0.03181   -0.00065    0.01107   -0.00249
AFIX 137
H20A  2    0.343149   -0.142529   -0.146073    11.00000   -1.50000
H20B  2    0.272612   -0.195446   -0.097925    11.00000   -1.50000
H20C  2    0.519924   -0.160752   -0.102931    11.00000   -1.50000
AFIX   0
C21   1    0.479340    0.118195    0.022777    11.00000    0.02216    0.01914 =
         0.01491    0.00040   -0.00121   -0.00002
AFIX  23
H21A  2    0.595411    0.155494    0.036338    11.00000   -1.20000
H21B  2    0.345321    0.124515    0.043707    11.00000   -1.20000
AFIX   0
C22   1    0.787399    0.124060   -0.140876    11.00000    0.01447    0.02278 =
         0.02440   -0.00059    0.00070    0.00089
AFIX 137
H22A  2    0.778399    0.127456   -0.104386    11.00000   -1.50000
H22B  2    0.867803    0.172690   -0.153721    11.00000   -1.50000
H22C  2    0.865610    0.072865   -0.150429    11.00000   -1.50000
AFIX   0
C23   1    0.359495    0.397146   -0.244919    11.00000    0.05179    0.01735 =
         0.02251    0.00643    0.00974    0.00309
AFIX 137
H23A  2    0.512734    0.392872   -0.256596    11.00000   -1.50000
H23B  2    0.319585    0.456141   -0.241088    11.00000   -1.50000
H23C  2    0.260694    0.370868   -0.269319    11.00000   -1.50000
AFIX   0
C24   1   -0.075559    0.670459   -0.167993    11.00000    0.03757    0.01734 =
         0.02458    0.00399   -0.00347    0.00043
AFIX 137
H24A  2    0.082396    0.668548   -0.176166    11.00000   -1.50000
H24B  2   -0.109201    0.723075   -0.150887    11.00000   -1.50000
H24C  2   -0.162610    0.666791   -0.198794    11.00000   -1.50000
AFIX   0
C25   1   -0.381578    0.599501   -0.116887    11.00000    0.02883    0.02609 =
         0.04706   -0.00061    0.00786    0.00486
AFIX 137
H25A  2   -0.476674    0.594869   -0.146402    11.00000   -1.50000
H25B  2   -0.410154    0.652785   -0.100053    11.00000   -1.50000
H25C  2   -0.413390    0.553336   -0.093943    11.00000   -1.50000
AFIX   0
O1    3   -0.000061    0.054292    0.004402    11.00000    0.01894    0.02699 =
         0.02595    0.00428    0.00677    0.00064
O2    3    0.555672    0.031654    0.024784    11.00000    0.01693    0.02233 =
         0.01973    0.00603    0.00192    0.00146
AFIX 147
H2A   2    0.689145    0.029523    0.016548    11.00000   -1.50000
AFIX   0
O3    3    0.007930    0.605060   -0.089556    11.00000    0.03953    0.01472 =
         0.01794   -0.00019   -0.00567   -0.00109
AFIX 147
H3    2   -0.005583    0.563263   -0.071014    11.00000   -1.50000
AFIX   0
HKLF 4

REM  20190424_LMT 3-38-1 in P212121 #19
REM R1 =  0.0293 for    4802 Fo > 4sig(Fo)  and  0.0296 for all    4861 data
REM    260 parameters refined using      0 restraints

END

WGHT      0.0471      0.4456

REM Instructions for potential hydrogen bonds
HTAB C21 O1
HTAB O2 O1_$1
HTAB O3 O2_$2

REM Highest difference peak  0.220,  deepest hole -0.187,  1-sigma level  0.039
Q1    1  -0.0301 -0.2596 -0.0202  11.00000  0.05    0.22
Q2    1   0.1201  0.1176 -0.0857  11.00000  0.05    0.19
Q3    1   0.1943  0.1802 -0.1372  11.00000  0.05    0.18
Q4    1   0.0998  0.7180 -0.0117  11.00000  0.05    0.16
Q5    1  -0.2859 -0.1988  0.0076  11.00000  0.05    0.14
Q6    1   0.4788  0.0817 -0.1556  11.00000  0.05    0.14
Q7    1   0.4813  0.2417 -0.2146  11.00000  0.05    0.13
Q8    1   0.3655  0.3004 -0.1973  11.00000  0.05    0.13
Q9    1  -0.1659 -0.2463 -0.0297  11.00000  0.05    0.12
Q10   1  -0.1112  0.5542 -0.1478  11.00000  0.05    0.11
;
_shelx_res_checksum                43161
_shelx_hkl_file
;
   0   0  -2 229682. 4767.54   6
   0   0   2 217221. 4767.39   6
   0   0   3 12.7480 15.0156   6
   0   0  -3 146.963 25.8720   2
   0   0   4 63427.3 1374.57   1
   0   0   4 62290.7 1359.66   6
   0   0  -4 62321.8 1379.90   2
   0   0  -5 1.62008 31.8889   2
   0   0   5 49.0356 35.1883   2
   0   0   5-1.86223 23.3385   6
   0   0   5 102.326 34.2623   1
   0   0   6 346813. 7116.05   1
   0   0   6 333304. 7088.81   6
   0   0   6 330371. 7139.70   2
   0   0   7 22.5525 28.5097   6
   0   0  -7 40.7993 33.9277   2
   0   0   7 6.12462 45.9860   2
   0   0   7 83.2183 34.5061   1
   0   0   8 150380. 3240.51   2
   0   0  -8 156614. 3204.12   2
   0   0  -9 5.98237 30.1302   2
   0   0   9 8.46671 57.0487   2
   0   0  -9 16.7838 28.1671   5
   0   0 -10 63665.5 1454.75   2
   0   0  10 59890.8 1496.16   2
   0   0  10 65883.3 1463.35   1
   0   0 -10 62066.2 1396.88   5
   0   0 -11 43.0417 27.1453   5
   0   0  11 11.8952 44.9689   1
   0   0 -11 15.0453 37.3052   2
   0   0 -12 88735.7 1970.57   2
   0   0  12 82430.8 1899.51  17
   0   0  12 87149.9 2004.56   3
   0   0  12 86191.8 1975.33   1
   0   0 -12 85530.3 1892.04   5
   0   0  13 5.21786 41.1028   1
   0   0  13 41.6234 40.1013  17
   0   0  13 59.1289 48.2495   3
   0   0 -13 13.1456 24.2660   5
   0   0  13 3.06671 42.8498  10
   0   0 -13 13.9322 39.9933   2
   0   0 -14 18784.5 473.281   5
   0   0  14 18656.9 490.855  17
   0   0  14 18482.5 589.632   3
   0   0  14 19120.2 576.754   1
   0   0 -14 19387.6 556.356   2
   0   0  14 19162.2 510.467   7
   0   0  14 18235.3 504.279  10
   0   0  14 17881.3 446.648  16
   0   0  15 7.52087 51.5064   3
   0   0 -15-11.2594 40.3773   2
   0   0 -15-9.73960 22.4125   5
   0   0  15 25.9307 51.1462  10
   0   0  15-6.55013 41.0818   1
   0   0  15 30.9557 39.2480   7
   0   0  15 9.45122 45.5217  17
   0   0  15 17.2054 28.3144  16
   0   0  16 263647. 5714.33  17
   0   0  16 266902. 5737.19  10
   0   0  16 269779. 5865.25   1
   0   0  16 258472. 5657.10  16
   0   0  17 4.39969 59.2823  10
   0   0  18 18615.1 545.799  10
   0   0  19 25.4227 73.7365  10
   0   0  20 21109.4 619.409  10
   0   0  21 101.900 76.9426  10
   0   0  22 1848.20 156.205  10
   0   0  23 6.03282 78.5311  10
   0   0  24 12647.6 444.979  10
   0   0  25 5.97789 84.7981  10
   0   0  26 189.300 86.7969  10
   0   0  27 9.92979 81.0181  23
   0   0  27 21.4405 77.1706  10
   0   0  28 18280.9 524.945  10
   0   0  28 16270.1 506.679  23
   0   0  29-4.05680 67.5031  23
   0   0  29 25.5967 60.5166  10
   0   0  30 1385.27 104.556  10
   0   0  30 1171.95 104.584  23
   0   0  31-11.4997 52.8075  23
   0   0  32 758.369 67.3291  23
   0   1  -1 175302. 3657.27   7
   0  -1   1 173464. 3668.15   4
   0  -1   2 1197.23 39.9828   7
   0   1   2 1193.22 53.8865   3
   0  -1  -2 1200.45 51.7829   3
   0   1   2 1079.66 41.7334   5
   0   1   3 186733. 4085.98   5
   0  -1   3 191390. 4083.59   7
   0   1   3 194604. 4107.15   3
   0  -1  -3 192573. 4085.28   5
   0   1   4 218879. 4640.16   3
   0  -1  -4 218880. 4643.66   2
   0  -1  -4 219270. 4612.51   5
   0  -1   4 222637. 4612.52   7
   0  -1  -5 395506. 8637.31   2
   0  -1   5 396208. 8604.94   7
   0   1   5 406426. 8639.94   3
   0   1  -5 402165. 8604.95   6
   0   1   5 396852. 8637.27   1
   0  -1  -5 414534. 8604.31   5
   0   1   6 23276.4 564.537   3
   0   1  -6 22059.1 525.143   6
   0  -1  -6 22951.9 524.093   5
   0  -1   6 23361.8 528.147   7
   0   1   6 22782.4 529.787   6
   0  -1  -6 21795.2 556.894   2
   0   1   6 23503.4 563.339   1
   0  -1  -7 26175.3 639.687   2
   0  -1   7 26692.3 605.176   7
   0   1   7 24929.5 604.721   6
   0  -1  -7 25300.8 598.436   5
   0   1   7 25065.5 643.785   3
   0   1  -7 25642.6 602.016   6
   0   1  -8 49358.4 1167.42   2
   0  -1  -8 50481.7 1174.60   2
   0   1   8 47414.0 1135.77   6
   0   1   8 55400.3 1191.97   1
   0   1   8 49676.1 1186.06   3
   0   1  -8 49716.1 1129.25   6
   0  -1  -8 52684.2 1129.12   5
   0  -1   8 51507.0 1136.32   7
   0   1   9 24605.0 647.925   3
   0   1  -9 24718.2 628.186   2
   0   1   9 25222.3 643.766   1
   0   1   9 24050.7 590.442   6
   0  -1   9 24775.4 615.367   1
   0  -1  -9 25542.1 582.217   5
   0  -1  -9 24649.8 628.911   2
   0  -1   9 24920.3 592.324   7
   0  -1   9 23138.5 650.875   2
   0  -1 -10 10022.9 269.373   5
   0  -1 -10 9707.82 312.605   2
   0   1  10 9200.21 275.751   6
   0   1  10 10436.3 332.535   1
   0   1 -10 9921.16 313.547   2
   0  -1  10 10539.4 310.725   1
   0  -1  10 9804.66 346.123   2
   0   1  10 10210.0 336.176   3
   0  -1  10 9975.05 282.016   7
   0   1  11 138473. 3161.94   6
   0  -1 -11 144955. 3151.97   5
   0  -1  11 142691. 3273.78   2
   0  -1  11 147073. 3172.20   7
   0   1 -11 143728. 3217.74   2
   0  -1  11 149139. 3212.92   1
   0   1  11 151252. 3249.48   1
   0   1  11 147125. 3254.32   3
   0  -1 -11 143307. 3216.22   2
   0  -1 -12 181520. 3951.54   2
   0  -1  12 193008. 3960.36   1
   0  -1  12 173088. 3896.23  10
   0   1  12 176184. 3889.94   6
   0   1  12 171384. 3882.37  17
   0   1  12 180856. 3995.41   3
   0   1 -12 175285. 3872.44   5
   0  -1 -12 185584. 3875.98   5
   0  -1  12 171828. 3881.92  17
   0  -1  12 176523. 4020.00   2
   0   1  12 193466. 3995.96   1
   0   1 -12 178109. 3951.93   2
   0  -1  12 180750. 3899.24   7
   0  -1  13 2867.07 158.792   1
   0  -1  13 2466.00 181.077   2
   0   1  13 2910.18 176.650   1
   0   1  13 2603.98 172.746   3
   0  -1  13 2786.72 133.005   7
   0  -1  13 2520.95 133.084  10
   0   1  13 2659.10 124.889  17
   0  -1  13 2558.19 99.9477  16
   0   1  13 2765.70 133.566  10
   0  -1 -13 2797.94 116.674   5
   0   1 -13 2708.44 157.866   2
   0  -1 -13 2887.83 158.895   2
   0   1 -13 2646.10 113.396   5
   0   1  14 8391.82 353.365   3
   0  -1  14 9109.39 331.534   1
   0  -1  14 8023.92 236.819  16
   0   1  14 8717.06 285.944  10
   0   1  14 8464.67 229.831  16
   0   1  14 8949.24 276.007  17
   0   1 -14 8785.73 327.774   2
   0   1  14 9095.82 357.853   1
   0  -1  14 8655.61 284.225   7
   0  -1  14 9063.81 288.678  10
   0  -1 -14 8781.36 323.592   2
   0   1 -14 8711.82 255.773   5
   0   1 -15 2494.84 113.831   5
   0   1  15 2744.48 192.270   1
   0  -1  15 2485.67 182.880   3
   0  -1  15 2478.51 167.128   1
   0   1 -15 2489.09 162.757   2
   0  -1 -15 2542.90 162.198   2
   0   1  15 2526.91 140.396  10
   0  -1  15 2596.73 141.339   7
   0   1  15 2672.78 100.560  16
   0  -1  15 2373.49 104.242  16
   0   1  15 2808.76 196.880   3
   0   1  15 2345.35 129.338  17
   0  -1  15 2515.59 140.615  10
   0   1  15 2664.48 143.307   7
   0   1  16 24680.7 642.953  17
   0   1  16 24032.6 586.629  16
   0  -1  16 25554.2 663.620  10
   0   1  16 25313.2 661.588  10
   0  -1  16 25481.0 739.135   1
   0   1  17 3844.82 140.684  16
   0   1  17 4015.32 196.641  10
   0   1  17 4107.73 186.321  17
   0  -1  17 4419.35 202.596  10
   0   1  18 53443.6 1304.94  10
   0   1  18 52982.4 1280.94  17
   0  -1  18 54617.5 1306.95  10
   0  -1  19 3529.73 193.573  10
   0   1  19 3237.49 177.098  17
   0   1  19 3562.40 194.033  10
   0   1  20 5495.24 249.806  10
   0  -1  20 5038.50 242.749  10
   0   1  21 20037.2 608.434  10
   0  -1  21 20615.8 611.593  10
   0  -1  22 113.407 81.7681  10
   0   1  22 35.1467 76.2677  10
   0   1  23 38884.8 1019.13  10
   0  -1  23 37936.2 1019.86  10
   0   1  24 571.347 108.450  10
   0  -1  24 618.219 110.093  10
   0   1  25 1488.78 146.422  10
   0  -1  25 1166.56 141.598  23
   0  -1  25 1593.43 149.650  10
   0  -1  26 10756.4 387.044  10
   0   1  26 10767.1 385.346  10
   0  -1  27 2186.51 160.134  23
   0  -1  27 2111.17 157.471  10
   0   1  27 2047.27 154.360  10
   0  -1  28 4092.96 205.129  10
   0  -1  28 4085.60 202.847  23
   0   1  28 3946.89 201.928  10
   0  -1  29 1340.38 114.298  10
   0   1  29 1324.05 113.176  10
   0  -1  29 1244.90 113.895  23
   0   1  29 1035.31 115.172  23
   0  -1  30 166.034 59.6565  10
   0   1  30 192.161 60.4089  10
   0  -1  30 169.504 68.2927  23
   0   1  30 86.5780 65.5225  23
   0   1  31 3743.12 161.432  23
   0   1  31 4018.83 159.917  10
   0  -1  31 3974.34 163.962  23
   0  -1  32 149.440 41.6211  23
   0   1  32 113.974 41.7729  23
   0   2   0 92635.6 2009.82   4
   0   2  -1 181060. 3988.19   4
   0  -2  -1 191440. 4005.43   1
   0  -2   1 186329. 3986.59   4
   0   2  -2 275920. 5705.77   7
   0  -2   2 268420. 5725.77   2
   0  -2  -2 268765. 5735.53   3
   0  -2   2 268204. 5727.62   4
   0  -2  -2 279933. 5745.20   1
   0   2  -3 181574. 3830.64   7
   0  -2   3 180307. 3855.03   2
   0   2   3 184653. 3841.87   5
   0  -2   3 181976. 3835.08   7
   0  -2  -3 180996. 3862.55   3
   0   2   3 175498. 3868.21   3
   0  -2   4 47243.2 1034.70   2
   0  -2  -4 47254.2 1037.44   3
   0  -2   4 46624.6 1009.50   7
   0   2   4 46827.8 1048.84   3
   0   2   4 47714.6 1016.38   5
   0   2   5 151920. 3242.29   5
   0   2   5 155755. 3284.70   3
   0  -2   5 151664. 3236.05   7
   0   2   6 14793.3 392.051   3
   0  -2   6 14345.6 344.154   7
   0  -2  -6 13849.5 386.300   2
   0   2   6 13554.8 346.731   5
   0  -2  -7 11309.7 334.921   2
   0  -2   7 11388.2 294.584   7
   0   2   7 12256.6 352.231   1
   0   2  -7 11426.3 295.267   6
   0   2   7 11548.4 342.509   3
   0  -2   8 5885.09 179.456   7
   0   2   8 5870.01 224.373   3
   0   2  -8 5940.17 178.938   6
   0   2   8 5949.55 230.114   1
   0  -2  -8 5906.17 214.022   2
   0  -2   9 20236.9 493.205   7
   0   2   9 19681.2 553.816   3
   0  -2  -9 19880.8 535.906   2
   0   2  -9 19687.8 488.965   6
   0   2   9 19578.9 497.267   6
   0   2  10 55890.2 1268.32   6
   0   2  10 59222.3 1355.11   1
   0  -2  10 56597.6 1265.60   7
   0  -2 -10 55052.9 1311.33   2
   0   2 -10 53248.4 1254.56   6
   0   2  10 56787.7 1345.78   3
   0  -2 -11 71155.6 1636.55   2
   0   2  11 70485.8 1587.58   6
   0  -2  11 69801.6 1583.44   7
   0   2 -11 70545.3 1571.83   6
   0  -2  11 72850.4 1615.66   1
   0   2  11 71245.1 1674.95   3
   0  -2  12 88233.9 2049.38  16
   0  -2  12 87257.1 2084.43  23
   0  -2  12 96507.9 2101.69   7
   0  -2  12 99639.1 2139.79   1
   0   2  12 97633.4 2100.41  10
   0   2  12 93031.3 2199.71   3
   0   2  12 95709.8 2100.36   6
   0   2  12 103813. 2229.06   1
   0  -2  12 93015.8 2102.83  10
   0   2 -12 95203.3 2158.91   2
   0  -2 -12 98403.2 2154.78   2
   0  -2 -13 76585.6 1750.18   2
   0  -2  13 78297.7 1700.08  10
   0  -2  13 74394.2 1820.13   2
   0  -2  13 78257.0 1741.22   1
   0   2  13 79170.3 1825.12   1
   0  -2  13 77119.7 1699.91   7
   0   2 -13 77619.0 1761.97   2
   0   2  13 75475.8 1806.26   3
   0  -2  13 68414.3 1674.88  23
   0   2  13 71392.6 1686.69   6
   0  -2  13 70516.6 1639.99  16
   0   2  13 76615.2 1693.50  10
   0  -2  14 13088.1 494.724   2
   0   2  14 13162.4 480.732   3
   0  -2  14 12161.7 376.020  23
   0  -2  14 13802.0 396.700   7
   0   2 -14 13974.9 448.338   2
   0   2  14 13861.5 494.031   1
   0   2  14 13527.1 387.160   6
   0   2  14 13721.3 393.306  10
   0  -2 -14 13735.7 437.432   2
   0  -2  14 13567.4 394.455  10
   0   2  14 12366.9 373.499  17
   0   2 -14 13003.2 359.815   5
   0  -2  14 13742.6 434.019   1
   0   2  15 65383.7 1443.83  16
   0  -2  15 62192.7 1674.66   2
   0   2  15 67195.6 1526.30  10
   0   2 -15 66173.0 1601.10   2
   0  -2 -15 69217.3 1593.64   2
   0   2  15 66215.4 1671.12   3
   0  -2  15 59630.8 1502.66  23
   0   2  15 70251.4 1688.03   1
   0  -2  15 66865.7 1586.04   1
   0  -2  15 66449.8 1535.03   7
   0  -2  15 67766.8 1530.09  10
   0   2  15 62947.4 1503.56  17
   0  -2  16 12172.8 432.861   1
   0   2  16 12328.9 386.466  10
   0   2  16 12364.6 373.110  17
   0   2  16 12242.3 314.629  16
   0  -2  16 11355.9 369.955  23
   0   2  17 35007.6 862.709  17
   0   2  17 33537.9 789.047  16
   0  -2  17 36590.4 887.855  10
   0   2  17 35856.2 882.893  10
   0   2  18 19754.6 564.373  10
   0   2  18 19980.4 548.285  17
   0  -2  18 20339.9 571.584  10
   0  -2  19 451.463 93.2471  23
   0  -2  19 461.449 90.2074  10
   0   2  19 463.046 84.9496  17
   0   2  19 594.962 96.6540  10
   0   2  20 912.677 113.661  10
   0  -2  20 963.397 119.413  10
   0   2  20 975.240 110.173  17
   0  -2  20 781.290 110.498  23
   0   2  21 18346.2 554.231  10
   0  -2  21 19235.8 567.787  10
   0  -2  22 188.658 99.2741  23
   0   2  22 129.264 84.6432  10
   0  -2  22 114.820 81.8186  10
   0   2  23 3157.89 198.781  10
   0  -2  23 2923.37 195.789  23
   0  -2  23 3183.01 204.483  10
   0   2  24 9783.74 373.959  10
   0  -2  24 10375.4 384.621  10
   0  -2  24 9058.65 361.889  23
   0  -2  25 309.745 102.839  23
   0   2  25 302.394 92.8851  10
   0  -2  25 192.870 94.2380  10
   0   2  26 239.209 84.9260  10
   0  -2  26 414.795 101.204  10
   0  -2  26 370.776 103.212  23
   0  -2  27 542.718 99.5377  10
   0  -2  27 460.473 101.430  23
   0   2  27 554.419 100.167  10
   0  -2  28-29.2072 69.0521  10
   0  -2  28-13.4024 75.7442  23
   0   2  28 65.1432 71.9419  10
   0  -2  29 9306.75 320.518  23
   0   2  29 9611.93 321.777  10
   0  -2  29 9518.30 326.503  10
   0  -2  30 5733.95 213.663  23
   0   2  30 5492.81 208.966  10
   0  -2  31 307.079 60.6596  23
   0   2  31 307.011 63.4444  23
   0   2  31 315.819 52.2193  10
   0  -2  32 27979.6 665.574  23
   0   2  32 27614.2 664.981  23
   0   3   0 70.6314 33.9705   4
   0  -3  -1 63649.1 1363.08   1
   0   3  -1 58011.1 1339.04   4
   0  -3   2 1138.42 65.2576   4
   0   3  -2 999.679 66.5161   4
   0   3  -2 1051.54 44.8425   7
   0  -3  -2 1218.66 75.2005   1
   0  -3  -2 961.406 70.3329   3
   0  -3   3 255739. 5564.86   4
   0   3  -3 256343. 5530.22   7
   0  -3   3 245786. 5559.16   2
   0  -3  -3 264396. 5578.29   3
   0  -3  -4 2159.69 106.520   1
   0   3  -4 2015.44 71.1448   7
   0  -3   4 1844.61 91.2739   2
   0   3   4 1708.47 109.981   1
   0   3   4 1954.57 82.0029   5
   0  -3  -4 1885.48 96.8801   3
   0   3   5 949192. 20105.4   5
   0   3   5 894128. 20147.0   3
   0  -3   5 999999. 20133.4   2
   0  -3  -5 871248. 20128.2   3
   0  -3  -5 949628. 20143.0   1
   0  -3   5 965553. 20096.1   7
   0   3   6 19767.0 476.534   5
   0  -3   6 18508.7 464.839   7
   0  -3   6 19694.9 501.769   2
   0   3   6 20049.2 523.297   3
   0  -3  -6 20699.1 504.756   3
   0   3   7 461438. 10359.7   3
   0   3   7 479166. 10299.4   5
   0  -3   7 483537. 10338.9   2
   0   3  -7 478092. 10333.4   2
   0  -3   7 488460. 10293.5   7
   0  -3  -7 487430. 10354.1   2
   0  -3   8 42874.3 1024.22   2
   0  -3   8 42272.5 972.368   7
   0   3   8 43014.3 1047.64   3
   0   3  -8 41986.9 1014.58   2
   0  -3  -8 43116.1 1032.37   2
   0  -3   9 39304.8 981.650   2
   0   3  -9 40400.5 921.679   6
   0   3   9 43510.8 1029.87   1
   0   3   9 41446.2 1007.65   3
   0  -3   9 41450.8 924.124   7
   0  -3  -9 41761.1 983.799   2
   0   3  10 181126. 4178.85   3
   0  -3 -10 189316. 4147.50   2
   0  -3  10 180225. 4158.40   2
   0   3 -10 188220. 4082.02   6
   0   3  10 198376. 4215.22   1
   0  -3  10 190661. 4089.65   7
   0  -3  11 150.292 45.9233  10
   0   3  11 234.335 45.0532   6
   0   3 -11 195.887 40.0035   6
   0   3  11 212.611 65.3913   1
   0  -3 -11 222.093 55.8129   2
   0  -3  11 205.973 44.6595   7
   0   3  11 144.121 57.7486   3
   0  -3  11 158.675 46.5264  23
   0  -3  12 124078. 2803.01  23
   0  -3  12 127897. 2838.80   1
   0  -3  12 127742. 2819.03  10
   0  -3 -12 127902. 2871.61   2
   0   3 -12 130614. 2802.29   6
   0   3  12 127783. 2935.22   3
   0   3  12 130112. 2953.20   1
   0   3  12 121927. 2815.02  10
   0   3  12 128034. 2821.61   6
   0  -3  12 128807. 2817.62   7
   0  -3  13 71421.6 1686.21  23
   0   3  13 74365.4 1699.89  10
   0   3  13 75683.7 1828.04   3
   0   3  13 73847.6 1703.43   6
   0   3  13 78103.2 1856.17   1
   0  -3  13 78469.7 1735.25   1
   0  -3 -13 75065.7 1756.11   2
   0  -3  13 72840.2 1706.65  10
   0  -3  13 74271.7 1702.53   7
   0  -3  14 4971.02 218.026   1
   0   3  14 4573.44 262.792   3
   0  -3 -14 4987.49 180.299  12
   0  -3 -14 4747.21 225.629   2
   0  -3  14 4570.27 196.482   7
   0  -3  14 4679.29 191.837  23
   0   3  14 4712.82 195.674  10
   0  -3  14 4798.99 201.164  10
   0   3  14 4719.80 272.167   1
   0   3  14 4662.25 194.668   6
   0  -3  15 2303.53 148.979   1
   0  -3  15 2133.26 132.372   7
   0   3  15 2273.00 133.851  10
   0  -3 -15 2165.94 151.291   2
   0  -3  15 2124.22 129.824  23
   0  -3 -15 2262.71 116.861  12
   0  -3  15 2030.10 135.946  10
   0   3  15 2107.93 126.434   6
   0   3  15 2112.10 181.850   3
   0  -3  16 588.291 86.6113  10
   0   3  16 616.668 82.6796  10
   0  -3  16 539.488 82.6166  23
   0  -3  17-37.9446 67.0298  10
   0   3  17 58.9619 56.6203  10
   0  -3  17 41.6455 66.3964  23
   0   3  18 1767.01 135.527  10
   0  -3  18 1950.40 147.624  10
   0  -3  18 1757.09 138.087  23
   0   3  19 4119.05 214.148  10
   0  -3  19 3868.04 203.615  23
   0  -3  19 4607.56 225.167  10
   0   3  20 9751.53 356.457  17
   0   3  20 10379.0 374.686  10
   0  -3  20 10300.2 366.959  23
   0  -3  20 10981.3 387.025  10
   0  -3  21 42642.3 1057.23  10
   0  -3  21 38749.2 1023.74  23
   0   3  21 41655.8 1046.19  10
   0   3  21 37706.7 1010.84  17
   0   3  22 3948.33 212.650  17
   0   3  22 3735.30 216.041  10
   0  -3  22 3795.87 222.815  10
   0  -3  22 3825.99 216.511  23
   0   3  23 24880.8 716.030  10
   0  -3  23 24375.5 701.148  23
   0  -3  23 24623.5 719.479  10
   0  -3  24 5418.24 272.785  10
   0  -3  24 5331.06 263.140  23
   0   3  24 5768.78 268.996  10
   0  -3  25 13178.9 443.530  10
   0   3  25 12152.5 426.776  10
   0  -3  25 11695.6 421.322  23
   0  -3  26 16672.3 527.236  10
   0  -3  26 16000.7 508.961  23
   0   3  26 16763.3 516.826  10
   0  -3  27 1589.49 140.687  23
   0   3  27 1546.55 133.560  10
   0  -3  27 1679.08 142.475  10
   0  -3  28 8415.55 307.009  23
   0   3  28 8703.74 308.209  10
   0  -3  28 8233.30 312.255  10
   0  -3  29 4913.50 209.615  23
   0   3  29 4742.28 202.994  10
   0  -3  30 428.810 70.4058  23
   0   3  30 447.354 64.6198  10
   0  -3  31 4285.95 165.555  23
   0   3  31 4194.27 152.794  10
   0   3  32-13.7002 34.8027  23
   0  -3  32 11.7783 33.8904  23
   0   4   0 68137.1 1527.99   4
   0   4  -1 5957.16 196.425   4
   0  -4  -1 6359.97 216.309   1
   0   4  -2 152319. 3342.16   7
   0   4  -2 155822. 3389.78   4
   0   4  -3 33886.1 763.132   7
   0  -4  -3 33908.9 821.135   3
   0  -4   3 33199.7 799.593   4
   0  -4   3 34316.8 799.515   2
   0  -4   4 122647. 2686.51   2
   0  -4   4 119383. 2684.95   4
   0   4  -4 124473. 2641.51   7
   0   4   4 123953. 2668.86   5
   0   4  -5 144282. 3062.82   7
   0  -4   5 142007. 3111.41   2
   0   4   5 140097. 3088.72   5
   0  -4  -5 138648. 3119.73   3
   0  -4   5 133178. 3108.19   4
   0  -4   6 34003.4 829.175   4
   0   4   6 34008.6 803.542   5
   0  -4  -6 33993.2 831.403   3
   0  -4   6 33505.8 827.737   2
   0  -4  -7 190179. 3998.54   1
   0  -4   7 182092. 3983.34   4
   0  -4   7 182784. 3933.96   7
   0  -4  -7 187128. 3981.69   3
   0   4   7 181499. 3948.35   5
   0  -4   7 185796. 3984.80   2
   0  -4   8 738.056 56.5841   7
   0  -4   8 660.396 75.6892   2
   0  -4  -8 671.820 75.7628   2
   0   4   8 726.313 85.4556   3
   0   4   8 743.711 63.8128   5
   0  -4   9 182460. 4001.33   7
   0  -4  -9 182871. 4072.37   2
   0  -4   9 186246. 4070.55   2
   0   4   9 186735. 4100.75   3
   0  -4  10 9509.30 290.391   7
   0   4  10 9585.10 363.535   3
   0  -4  10 9675.15 344.282   2
   0  -4  10 9502.63 287.439  23
   0  -4  11 10922.9 383.312   2
   0  -4  11 11286.6 323.582   7
   0   4  11 10988.5 402.523   3
   0   4  11 11230.3 429.421   1
   0   4  11 10869.1 323.172  10
   0  -4  11 10549.5 322.337  10
   0  -4 -11 10540.4 361.678   2
   0  -4  11 10753.3 315.648  23
   0   4 -11 10307.0 310.049   6
   0   4  12 882.185 78.7188   6
   0   4 -12 750.972 65.9366   6
   0  -4 -12 932.256 95.5894   2
   0   4  12 968.097 116.480   3
   0  -4  12 889.950 84.5507  10
   0  -4  12 1001.88 81.0013   7
   0   4  12 789.422 113.683   1
   0  -4  12 900.863 82.0101  23
   0  -4  12 953.680 105.253   2
   0   4  12 927.279 81.4150  10
   0  -4  13 14697.3 422.118  23
   0  -4  13 15811.1 439.781   7
   0   4  13 14067.0 546.925   1
   0   4  13 15008.4 532.236   3
   0  -4 -13 15262.8 478.325   2
   0   4 -13 14647.1 414.417   6
   0  -4  13 15646.2 440.920  10
   0  -4  13 15858.1 532.579   2
   0  -4 -13 14572.1 408.760  12
   0   4  13 15300.7 432.837  10
   0  -4  13 15390.0 448.307   1
   0   4  13 15423.6 443.269   6
   0  -4 -14 8772.62 276.133  12
   0   4  14 9110.23 394.598   3
   0   4  14 8846.56 298.931  10
   0   4  14 8828.86 303.884   6
   0  -4  14 9113.90 316.818   1
   0  -4  14 8544.29 290.200  23
   0  -4 -14 8485.01 332.625   2
   0  -4  14 9240.13 308.072  10
   0  -4  14 8827.00 302.520   7
   0   4  15 17548.0 622.901   3
   0  -4 -15 17134.0 543.651   2
   0  -4 -15 17759.5 468.424  12
   0  -4  15 16989.4 485.826  23
   0   4  15 16832.0 497.628   6
   0  -4  15 17209.3 502.192   7
   0   4  15 17150.7 494.667  10
   0  -4  15 16929.9 502.011  10
   0  -4  16 20415.8 572.202  10
   0  -4 -16 19614.3 526.068  12
   0   4  16 19752.4 561.502  10
   0  -4  16 19503.2 551.170  23
   0   4  17 93.7128 61.0130  10
   0  -4  17 13.0339 69.0761  23
   0  -4  17 99.1357 69.2643  10
   0  -4  18 95.1292 76.9829  10
   0   4  18 150.135 71.3287  10
   0  -4  18 208.730 78.2939  23
   0  -4  19 363.684 95.6020  10
   0  -4  19 526.419 100.634  23
   0   4  19 477.955 94.0237  10
   0  -4  20 26357.8 740.042  23
   0  -4  20 27826.4 766.419  10
   0   4  20 27014.9 754.532  10
   0  -4  21 225.114 98.2390  10
   0  -4  21 263.084 94.8811  23
   0   4  21 144.713 75.4706  10
   0   4  22 3597.57 207.335  10
   0  -4  22 3231.40 202.111  23
   0  -4  22 3274.52 211.170  10
   0  -4  23 1472.94 148.129  10
   0  -4  23 1509.79 149.252  23
   0   4  23 1518.85 142.288  10
   0  -4  24 18017.5 577.525  10
   0   4  24 18738.9 572.673  10
   0  -4  24 18221.5 564.877  23
   0  -4  25 4482.95 239.595  10
   0   4  25 4658.60 234.099  10
   0  -4  25 4436.88 231.924  23
   0  -4  26 7440.02 311.996  10
   0  -4  26 7217.92 298.180  23
   0   4  26 7836.40 307.636  10
   0   4  27 6158.59 257.060  10
   0  -4  27 6118.76 261.448  23
   0   4  28 3452.86 175.191  10
   0  -4  28 3274.30 176.637  23
   0   4 -29 12716.4 362.791  13
   0  -4  29 13792.2 402.354  23
   0   4  29 13868.6 398.831  10
   0   4  30 44.8177 41.5011  10
   0  -4  30 55.2517 55.7555  23
   0  -4  31 119.460 46.9107  23
   0   4  32 467.076 47.3314  23
   0   5   0 28.4005 43.9144   4
   0   5   1 62868.1 1428.79   4
   0  -5  -1 63584.0 1445.67   1
   0   5  -1 60577.5 1422.38   4
   0   5  -2 36358.4 838.818   7
   0   5  -2 37881.3 898.609   4
   0   5  -3 3125.50 102.337   7
   0  -5   3 3175.72 134.275   2
   0  -5  -3 2987.10 147.813   3
   0  -5   4 46499.5 1060.35   4
   0  -5  -4 48458.6 1095.82   1
   0   5  -4 44108.3 1004.53   7
   0  -5  -4 44975.6 1080.31   3
   0  -5   4 45355.2 1058.43   2
   0  -5  -5 19881.5 537.386   3
   0  -5   5 19906.8 523.694   4
   0  -5   5 20495.6 526.632   2
   0   5   5 20710.2 508.221   5
   0  -5  -5 20827.4 553.034   1
   0   5  -5 19858.8 471.254   7
   0  -5  -6 57652.6 1361.44   3
   0  -5   6 58741.5 1355.51   2
   0  -5  -6 61310.6 1383.62   1
   0   5   6 58559.7 1329.94   5
   0  -5   6 56410.0 1345.76   4
   0  -5  -7 21160.4 566.167   3
   0  -5   7 21349.8 567.462   2
   0  -5   7 19563.2 554.453   4
   0   5   7 21056.3 540.371   5
   0   5   8 38803.4 921.799   5
   0  -5   8 37575.5 955.705   2
   0  -5   8 37343.4 945.905   4
   0  -5  -9 105526. 2296.96   1
   0  -5   9 101687. 2272.08   4
   0  -5   9 102283. 2288.45   2
   0  -5   9 98796.7 2216.11  23
   0   5   9 100154. 2235.46   5
   0  -5  10 12146.2 411.210   2
   0  -5 -10 12615.3 344.797  15
   0   5  10 12603.9 329.826  13
   0  -5  10 12518.9 400.136   4
   0   5  10 12163.2 359.581  10
   0  -5 -10 11741.3 405.988   2
   0   5  11 7674.76 228.659  13
   0   5  11 7579.91 256.834  10
   0  -5  11 7632.26 312.146   2
   0  -5  11 7963.96 299.227   4
   0  -5 -11 7748.12 303.028   2
   0  -5  11 7795.04 253.937  23
   0  -5  12 3285.17 151.016  23
   0  -5 -12 2939.55 175.345   2
   0  -5  12 3050.94 193.430   2
   0   5  12 3030.55 149.832  10
   0  -5  12 3418.48 186.511   4
   0  -5 -12 2984.97 135.300  12
   0  -5  12 2839.30 141.349   7
   0   5 -12 3118.88 142.784   6
   0  -5  13 6259.47 233.590   7
   0  -5  13 5875.02 270.572   4
   0   5 -13 6137.24 221.867   6
   0  -5 -13 6292.01 217.320  12
   0  -5  13 5779.78 233.544  10
   0  -5 -13 5953.71 265.104   2
   0   5  13 6215.12 234.528  10
   0  -5  13 6361.44 231.526  23
   0   5  13 5890.08 238.987   6
   0  -5 -14 47.7821 42.2053   2
   0   5  14 42.0479 37.6857   6
   0  -5  14 97.8587 64.7349  10
   0  -5 -14-12.5928 36.7388  12
   0  -5  14-7.42392 57.0282  23
   0  -5  14 20.5816 34.7139   7
   0   5  14-3.99810 52.0463  10
   0  -5  15 135.776 69.7067  23
   0  -5  15 192.051 73.3977  10
   0   5  15 120.169 58.3886  10
   0  -5  16 64.2680 66.8764  23
   0  -5  16 4.89606 69.4585  10
   0   5  16 64.3045 59.7984  10
   0  -5  17 3347.95 192.946  10
   0  -5  17 3372.96 184.414  23
   0   5  17 3132.89 180.527  10
   0  -5  18 597.314 103.822  10
   0   5  18 755.668 100.150  10
   0  -5  18 552.345 94.0600  23
   0   5  19 37542.0 981.361  10
   0  -5  19 38158.9 973.806  23
   0  -5  19 37265.0 992.923  10
   0  -5  20 58216.8 1417.23  10
   0  -5  20 56009.5 1389.54  23
   0   5  20 56207.3 1397.77  10
   0  -5  21 11554.2 413.854  23
   0  -5  21 12346.2 435.846  10
   0  -5  22 568.828 115.135  10
   0  -5  22 777.776 121.535  23
   0   5  22 667.416 105.734  10
   0   5  23 32499.5 888.173  10
   0  -5  23 33291.2 881.300  23
   0  -5  23 32645.5 903.198  10
   0  -5  24 3174.14 204.360  10
   0  -5  24 3047.79 193.930  23
   0   5  24 2943.50 188.856  10
   0   5  25 470.044 95.9419  10
   0  -5  25 510.763 115.501  23
   0   5  26 949.411 110.098  10
   0  -5  26 982.266 120.617  23
   0   5  27 1110.85 108.070  10
   0   5 -27 1063.69 87.1095  13
   0  -5  27 1249.07 121.613  23
   0  -5  28 556.756 87.3405  23
   0   5  28 639.453 84.0887  10
   0   5  29 5371.10 203.734  10
   0  -5  29 5300.33 211.855  23
   0   5  30 24.0839 36.5304  10
   0  -5  30 56.3663 47.4110  23
   0  -5  31 114.596 40.6691  23
   0   6   0 130300. 2971.38   4
   0  -6   0 137925. 2997.09   1
   0   6  -1 7468.46 257.125   4
   0  -6  -1 7186.48 266.855   1
   0   6   1 6925.95 254.182   4
   0   6  -2 33258.6 830.180   4
   0   6  -2 31767.5 755.936   7
   0   6  -3 55849.6 1288.41   7
   0  -6   3 60431.9 1349.09   2
   0  -6  -3 58148.6 1383.66   3
   0  -6  -4 47483.5 1137.05   3
   0  -6  -4 49674.0 1149.81   1
   0  -6   4 47706.2 1106.48   2
   0   6  -4 45534.8 1042.14   7
   0  -6  -5 120.793 51.7876   3
   0   6  -5 148.421 26.6550   7
   0  -6  -5 165.621 54.4847   1
   0   6   5 97.0751 41.1823   5
   0  -6   5 137.684 41.4070   2
   0  -6  -6 226573. 5192.21   3
   0  -6  -6 246661. 5225.57   1
   0  -6   6 238027. 5176.36   4
   0   6   6 240261. 5162.08   5
   0  -6   6 237178. 5187.24   2
   0   6   7 43538.1 1012.97   5
   0  -6  -7 45615.8 1074.43   1
   0  -6   7 42640.4 1024.72   4
   0  -6  -7 41248.8 1035.61   3
   0  -6   7 40277.6 986.730  23
   0  -6   7 42378.5 1038.80   2
   0  -6   8 35464.7 845.301  23
   0  -6   8 35396.0 902.028   2
   0   6   8 35391.3 867.774   5
   0  -6   8 34827.9 880.472   4
   0  -6  -8 35647.2 919.651   1
   0   6   8 35561.3 857.398  10
   0  -6  -8 35383.9 893.000   3
   0  -6  -9 3686.37 199.579   2
   0   6   9 4150.63 140.866  13
   0   6   9 3946.15 168.044  10
   0  -6   9 3897.95 184.631   4
   0   6   9 4151.54 178.225   5
   0  -6  -9 4138.04 206.697   1
   0  -6  -9 4075.39 152.306  15
   0  -6   9 4091.63 165.888  23
   0  -6   9 3963.04 197.687   2
   0  -6  10 1355.36 118.277   2
   0  -6 -10 1337.71 119.388   2
   0  -6 -10 1740.91 97.2812  15
   0  -6  10 1417.81 97.8446  23
   0  -6  10 1459.82 112.108   4
   0  -6 -10 1464.88 123.870   1
   0   6  10 1273.30 98.5450   5
   0   6  10 1427.01 79.1025  13
   0   6  10 1305.42 96.3958  10
   0  -6 -11 25097.9 638.938  12
   0   6  11 25666.1 658.341  10
   0  -6  11 25722.4 736.486   2
   0  -6  11 25443.0 650.834  23
   0  -6  11 25498.0 698.769   4
   0   6  11 25341.6 616.974  13
   0  -6 -11 24863.8 717.296   2
   0   6  12 831.338 86.1540  10
   0   6  12 921.662 85.9141  17
   0  -6  12 829.418 88.0599  23
   0  -6 -12 982.404 79.1488  12
   0   6 -12 964.381 80.8754   6
   0  -6 -12 944.650 102.137   2
   0  -6 -13 4604.95 185.393  12
   0  -6  13 4925.30 204.426  23
   0   6  13 4942.09 208.185  10
   0  -6 -13 4936.88 241.073   2
   0   6  13 4154.50 189.880  17
   0  -6 -14 23367.7 618.494  12
   0  -6  14 24249.1 642.907  23
   0   6  14 24254.5 650.230  10
   0   6  15 22016.4 603.382  10
   0  -6  15 22149.0 596.312  23
   0  -6  16 43986.6 1083.03  23
   0  -6  16 43059.0 1100.45  10
   0   6  16 43500.8 1091.75  10
   0   6  17 51.3123 63.4334  10
   0  -6  17 44.2695 71.7145  10
   0  -6  17-4.82081 73.3491  23
   0  -6  18 1127.84 131.352  10
   0  -6  18 1033.56 119.875  23
   0   6  18 1251.26 124.871  10
   0  -6  19 369.558 95.8122  23
   0   6  19 558.851 95.1009  10
   0  -6  19 599.175 111.430  10
   0  -6  20 7205.57 313.992  10
   0  -6  20 6949.37 299.572  23
   0   6  20 7260.46 305.633  10
   0  -6  21 18701.0 585.873  10
   0  -6  21 18477.5 569.930  23
   0   6  21 18157.4 569.533  10
   0  -6  22 5869.10 277.693  23
   0   6  22 6195.76 277.378  10
   0   6  23 206.628 82.7594  10
   0  -6  23 225.765 103.929  23
   0   6  24-66.0922 73.5938  10
   0  -6  24 26.6657 86.0344  23
   0  -6  25 2800.42 179.831  23
   0   6  25 2762.04 171.149  10
   0   6  26 4252.47 206.427  10
   0  -6  26 4146.70 213.461  23
   0  -6  27 12.6902 71.1509  23
   0   6  27-8.18437 57.8301  10
   0  -6  28 3097.65 160.827  23
   0   6  28 3015.45 151.467  10
   0  -6  29-15.5926 54.9280  23
   0   6  29 73.9992 41.1592  10
   0  -6  30 630.830 67.5530  23
   0  -6  31 417.655 45.6018  23
   0   7   0 31.0731 43.6827   4
   0  -7   0 9.49912 42.5329   1
   0  -7   1 117428. 2628.98   1
   0   7  -1 112640. 2605.14   4
   0   7   1 111043. 2610.86   4
   0   7   2 2782.31 160.521   4
   0  -7  -2 2833.44 164.977   1
   0   7  -2 2796.50 104.043   7
   0   7  -2 2897.40 157.367   4
   0   7  -3 97085.1 2147.76   7
   0   7   3 97407.2 2263.22   4
   0  -7  -3 103965. 2272.11   1
   0  -7  -3 94670.5 2255.97   3
   0  -7   3 96652.2 2182.03  23
   0  -7   3 97836.0 2216.89   2
   0  -7  -3 103650. 2202.43  23
   0   7   4 5306.00 199.911   5
   0  -7  -4 5156.02 227.377   3
   0   7  -4 5189.30 156.425   7
   0  -7  -4 5186.46 193.990  23
   0  -7  -4 5430.61 235.398   1
   0   7   4 5834.71 247.631   4
   0   7   4 5261.77 183.501  19
   0  -7   4 5059.19 184.827  23
   0  -7   4 5352.86 209.793   2
   0  -7   5 24295.6 609.835  23
   0   7   5 24580.2 630.351   5
   0   7   5 24672.3 605.932  19
   0   7  -5 24412.5 568.404   7
   0  -7  -5 23183.2 661.741   3
   0  -7  -5 25602.6 687.649   1
   0  -7   5 24002.5 643.879   2
   0  -7  -6 121642. 2652.88   1
   0  -7   6 112612. 2557.15  23
   0   7   6 119327. 2590.25   5
   0  -7  -6 112329. 2619.34   3
   0  -7   6 115471. 2608.87   2
   0   7   6 115067. 2554.42  19
   0  -7  -7 167576. 3744.91  12
   0   7   7 170405. 3746.49  19
   0  -7  -7 177882. 3851.79   1
   0   7   7 171079. 3780.49   5
   0  -7   7 170493. 3751.26  23
   0   7   7 173221. 3709.57  13
   0  -7  -7 170862. 3810.90   3
   0  -7   7 171615. 3810.58   2
   0  -7  -8 25676.3 694.762   3
   0  -7  -8 25892.3 725.045   1
   0  -7   8 25612.9 678.064   4
   0   7   8 25862.4 608.843  13
   0  -7   8 25253.1 646.594  23
   0   7   8 26022.0 676.556   5
   0  -7   8 25060.4 700.237   2
   0  -7  -8 25510.6 623.370  15
   0  -7  -8 25064.3 639.167  12
   0   7   8 25306.0 656.689  10
   0  -7   9 25938.3 746.554   2
   0  -7   9 27614.7 690.656  23
   0  -7   9 27113.6 720.629   4
   0  -7  -9 26472.6 677.988  12
   0  -7  -9 27800.4 770.376   1
   0  -7  -9 27919.9 666.220  15
   0   7   9 27142.0 649.754  13
   0   7   9 27219.1 698.977  10
   0   7   9 27263.6 715.969   5
   0  -7 -10 134788. 2993.21  12
   0  -7 -10 131375. 3090.99   2
   0   7  10 138323. 2961.03  13
   0  -7 -10 136986. 3104.53   1
   0   7  10 132509. 3036.65   5
   0  -7 -10 136401. 2979.32  15
   0  -7  10 132795. 3091.92   2
   0  -7  10 134600. 3006.42  23
   0   7  10 136467. 3016.39  10
   0   7  11 1022.40 73.4767  13
   0  -7 -11 1100.35 111.512   2
   0  -7  11 1057.22 98.1172  23
   0  -7 -11 895.329 79.4566  12
   0   7  11 1006.44 95.0465  10
   0  -7  12 47593.9 1147.00  23
   0   7  12 47201.4 1139.36  17
   0  -7 -12 46337.7 1127.47  12
   0   7  12 49690.9 1161.48  10
   0   7  13 1492.17 119.149  10
   0  -7  13 1527.04 119.526  23
   0   7  13 1468.06 114.624  17
   0  -7 -13 1550.24 105.530  12
   0  -7  14 17214.6 492.620  23
   0   7  14 16438.4 483.734  17
   0   7  14 16836.9 498.081  10
   0  -7 -14 15732.9 462.479  12
   0  -7  15 11181.3 367.799  23
   0   7  15 10130.5 353.771  17
   0   7  15 10849.8 371.480  10
   0   7  16 10250.6 366.336  10
   0  -7  16 10540.8 364.519  23
   0  -7  17 88379.1 2067.77  23
   0   7  17 89381.5 2078.23  10
   0   7  18 384.413 90.7520  10
   0  -7  18 371.753 103.187  23
   0  -7  19 20520.1 613.003  23
   0   7  19 20662.6 615.850  10
   0  -7  20 223.583 100.625  23
   0   7  20 98.7881 79.9751  10
   0   7  21 6470.20 286.080  10
   0  -7  21 6386.14 289.594  23
   0  -7  22 4235.53 231.631  23
   0   7  22 4351.77 227.163  10
   0   7  23 83.2157 76.3115  10
   0  -7  23 76.0470 93.3160  23
   0  -7  24 57.0067 83.1408  23
   0   7  24 135.893 74.7277  10
   0   7  25 1881.89 137.484  10
   0  -7  25 1886.03 148.877  23
   0  -7 -26 11920.6 353.645  24
   0   7  26 12296.3 388.459  10
   0  -7  26 12341.3 396.836  23
   0  -7  27 10373.2 343.116  23
   0   7  27 10822.6 338.302  10
   0   7  28 1284.35 92.2755  10
   0  -7  28 1291.23 103.054  23
   0   7  29 8595.32 258.757  10
   0   7 -29 9277.46 265.764  21
   0  -7  29 9306.90 280.863  23
   0  -7  30 2836.92 118.698  23
   0  -8   0 290839. 6332.61  23
   0  -8   0 302397. 6433.49   1
   0   8   0 280663. 6411.11   4
   0   8   0 296532. 6328.76  19
   0   8  -1 57022.8 1409.66   4
   0  -8  -1 59276.2 1341.69  23
   0   8   1 57552.8 1419.33   4
   0  -8   1 62392.7 1432.55   1
   0   8   1 58664.2 1332.70  19
   0   8  -1 58850.9 1334.18  19
   0  -8  -1 62221.6 1435.23   1
   0  -8   1 57635.7 1336.09  23
   0   8  -1 54847.9 1299.04   7
   0  -8   2 84733.0 1898.35  23
   0  -8  -2 79239.7 1983.83   3
   0  -8  -2 88738.8 1995.11   1
   0  -8  -2 87209.3 1909.52  23
   0   8   2 85736.4 1894.51  19
   0  -8   2 84440.7 1932.67   2
   0  -8   2 84921.6 1984.42   1
   0   8  -2 82619.5 1855.74   7
   0   8   2 82191.5 1984.18   4
   0  -8   3 64611.6 1508.78   2
   0   8  -3 62157.0 1421.88   7
   0  -8   3 62950.2 1468.76  23
   0   8   3 62283.2 1557.74   4
   0  -8  -3 65516.2 1561.14   1
   0   8   3 64460.0 1466.76  19
   0  -8  -3 62913.3 1552.45   3
   0   8   4 213.020 54.5341  19
   0  -8  -4 249.105 63.9827   1
   0  -8  -4 209.253 66.2828  23
   0   8  -4 213.575 27.9224   7
   0  -8   4 294.091 60.1441  23
   0  -8  -4 143.659 56.6337   3
   0   8   4 193.716 62.4613   4
   0  -8   4 202.996 48.4502   2
   0   8   4 202.777 47.0410   5
   0  -8  -5 92.0402 48.5350   1
   0   8  -5 80.7565 21.5054   7
   0  -8  -5 81.3327 46.7132   3
   0  -8  -5 89.7591 60.1185  23
   0   8   5 48.2074 27.1732  13
   0   8   5 127.677 56.0994   4
   0   8   5 124.223 47.5600   5
   0   8   5 55.8176 48.7753  19
   0  -8   5 58.2214 38.9856   2
   0  -8   5 58.8585 51.0045  23
   0  -8   6 19.3003 36.1093   2
   0   8   6 47.3737 55.8470   4
   0  -8  -6 58.4324 46.2083   3
   0   8   6 8.40285 31.8662   5
   0  -8  -6 95.8639 52.1172   1
   0  -8  -6 33.9913 35.5948  15
   0   8   6 40.5441 27.5233  13
   0   8   6 30.5668 45.4363  19
   0  -8   6 54.6324 54.6354  23
   0  -8  -7 3206.51 192.182   1
   0  -8  -7 2832.82 167.382   3
   0   8   7 2832.93 143.268  19
   0  -8  -7 2768.95 138.409  12
   0   8  -7 2516.89 118.994   8
   0   8   7 2880.05 157.278   5
   0  -8   7 2929.78 146.448  23
   0  -8  -7 3134.56 129.375  15
   0   8   7 2946.78 114.975  13
   0  -8   7 2648.74 161.930   2
   0  -8   8 2727.05 145.742  23
   0   8   8 2715.97 112.399  13
   0  -8  -8 2981.97 187.374   1
   0  -8  -8 2821.95 138.681  12
   0  -8   8 2598.90 163.901   2
   0  -8  -8 2597.93 158.621   3
   0   8   8 2487.41 142.157  10
   0   8   8 2756.78 156.685   5
   0  -8  -8 2768.46 124.186  15
   0   8   9 7260.72 215.134  13
   0  -8  -9 6889.16 243.474  12
   0   8   9 6772.16 256.909  10
   0  -8   9 6847.11 251.684  23
   0  -8  -9 7194.83 228.494  15
   0  -8 -10 31450.4 790.314  12
   0   8  10 31513.6 811.529  10
   0  -8 -10 31292.6 771.041  15
   0   8  10 31729.7 754.133  13
   0  -8  10 31465.0 802.060  23
   0   8  11 14446.7 387.827  13
   0   8  11 14103.9 436.767  10
   0  -8 -11 14264.1 417.308  12
   0  -8  11 14041.6 430.235  23
   0   8  12 2024.33 139.981  10
   0  -8  12 2053.25 140.004  23
   0  -8 -12 1834.70 118.919  12
   0  -8 -13 26921.8 713.589  12
   0   8  13 27605.9 744.772  10
   0  -8  13 28408.1 739.806  23
   0   8  13 27760.8 728.470  17
   0  -8  14 77581.7 1789.31  23
   0   8  14 75364.8 1796.07  10
   0   8  14 75752.3 1778.01  17
   0   8  15 476.303 90.0218  10
   0   8  15 621.830 98.3931  17
   0  -8  15 629.685 103.930  23
   0   8  16 54450.6 1391.83  17
   0  -8  16 57772.8 1412.53  23
   0   8  17 12342.7 415.912  17
   0   8  17 12669.5 433.511  10
   0  -8  17 12841.4 431.834  23
   0   8  18 8892.31 341.380  10
   0  -8  18 8655.73 335.961  23
   0   8  18 7720.58 317.693  17
   0  -8  19 5412.26 262.996  23
   0   8  19 5598.61 265.110  10
   0  -8  20 23031.5 673.469  23
   0   8  20 23383.7 675.584  10
   0   8  21 2480.06 170.127  10
   0  -8  21 1847.90 168.570  23
   0   8  22 13510.4 450.174  10
   0  -8  22 13502.1 454.910  23
   0   8  23 38250.1 979.420  10
   0  -8  23 37124.6 979.097  23
   0   8  24 3181.97 181.158  10
   0  -8  24 3570.78 196.718  23
   0   8  25 4.34756 62.1336  10
   0  -8  25 17.9663 78.7155  23
   0  -8  26 8642.19 304.945  23
   0   8  26 8886.03 298.201  10
   0   8  27 9564.58 296.230  10
   0  -8  27 9238.26 305.737  23
   0   8 -28 4757.09 166.565  21
   0   8  28 4977.25 173.799  10
   0  -8  28 5113.27 191.502  23
   0  -8  29 25.2081 37.9264  23
   0  -9   0 37.0000 44.8752   1
   0   9   0 6.34076 52.1743  19
   0  -9   0 34.1741 58.8495  23
   0   9   0-12.6230 49.7101   4
   0  -9  -1 254795. 5383.52  23
   0   9   1 235485. 5470.48   4
   0  -9   1 251348. 5375.77  23
   0   9  -1 235362. 5459.86   4
   0  -9  -1 253253. 5474.25   1
   0   9   1 247454. 5366.69  19
   0   9  -1 242832. 5366.43  19
   0  -9   1 243696. 5405.28   2
   0  -9   1 253209. 5472.65   1
   0   9   2 9093.41 369.843   4
   0  -9   2 9463.76 328.664   2
   0  -9   2 9455.95 306.934  23
   0  -9  -2 9015.20 367.836   3
   0  -9   2 9021.06 357.158   1
   0   9  -2 9454.03 303.045  19
   0   9   2 9599.39 303.337  19
   0  -9  -2 9954.27 370.628   1
   0  -9  -3 32474.0 859.574   1
   0  -9  -3 33291.8 797.699  23
   0  -9  -3 28541.4 839.786   3
   0   9   3 30628.8 763.206  19
   0  -9   3 30858.2 770.078  23
   0   9  -3 29848.9 762.480  19
   0  -9   3 29703.4 802.004   2
   0  -9   3 31007.6 847.162   1
   0   9   3 29649.5 862.403   4
   0   9   4 59971.1 1354.51  19
   0  -9  -4 57630.8 1368.24  23
   0  -9   4 58395.2 1442.95   1
   0  -9   4 57691.9 1400.94   2
   0  -9  -4 56427.0 1439.35   3
   0   9   4 55828.3 1466.63   4
   0  -9  -4 61126.0 1457.18   1
   0  -9   4 56743.2 1356.33  23
   0   9   5 40394.3 898.161  13
   0   9   5 36092.6 1055.62   4
   0  -9  -5 39751.8 1045.81   1
   0  -9   5 38004.8 996.797   2
   0  -9   5 37791.4 953.104  23
   0  -9  -5 39994.7 917.063  15
   0  -9  -5 38396.9 962.115  23
   0   9   5 39646.8 950.950  19
   0  -9  -5 38060.8 1024.41   3
   0   9   6 13548.6 347.379  13
   0  -9  -6 13191.1 361.834  15
   0   9   6 12920.2 389.928  19
   0  -9   6 13403.7 398.991  23
   0  -9  -6 12051.2 394.351  23
   0  -9   6 13203.6 438.225   2
   0  -9  -6 13507.4 470.183   1
   0   9   7 1220.86 73.7888  13
   0   9   7 984.966 95.7189  19
   0  -9   7 1047.77 100.502  23
   0  -9  -7 1192.32 83.3301  15
   0  -9  -7 1120.21 93.4049  12
   0  -9  -8 2684.37 144.194  12
   0  -9   8 2682.59 128.529  15
   0  -9  -8 2831.08 130.238  15
   0   9   8 2796.46 160.095  10
   0  -9   8 2774.30 156.297  23
   0   9   8 2583.74 114.998  13
   0   9   9 15541.9 408.979  13
   0  -9  -9 14806.5 447.214  12
   0  -9   9 15511.3 461.078  23
   0   9   9 15684.3 471.953  10
   0  -9  -9 15530.6 424.880  15
   0  -9  10 169.670 72.8699  23
   0  -9 -10 227.806 57.3001  15
   0   9  10 137.277 70.2011  10
   0  -9 -10 142.741 54.6413  12
   0   9  10 154.427 42.9714  13
   0  -9 -11 6457.24 250.445  12
   0  -9  11 6917.09 269.161  23
   0   9  11 6522.26 222.465  13
   0   9  11 6883.94 274.624  10
   0   9  12 33199.3 872.011  10
   0  -9 -12 31975.6 836.806  12
   0  -9  12 34273.7 865.407  23
   0  -9 -13 6668.66 258.102  12
   0   9  13 7134.08 277.793  17
   0   9  13 7017.68 287.349  10
   0  -9  13 6934.57 282.225  23
   0  -9  14 324.053 95.8084  23
   0   9  14 358.062 90.1608  17
   0   9  14 339.254 84.8757  10
   0  -9  15 19437.8 575.539  23
   0   9  15 18642.4 576.765  10
   0   9  15 19116.8 563.960  17
   0   9  16 1955.26 152.560  17
   0  -9  16 1969.99 158.006  23
   0   9  16 1941.98 153.099  10
   0   9  17 66950.2 1629.11  10
   0   9  17 67724.8 1617.48  17
   0  -9  17 67177.5 1623.91  23
   0  -9  18 28.3964 90.8148  23
   0   9  18 21.3934 83.2152  17
   0   9  18 29.0639 72.2120  10
   0  -9  19 20412.7 624.123  23
   0   9  19 20970.0 616.544  17
   0   9  19 21251.9 626.037  10
   0   9  20 153.164 81.4508  10
   0   9  20 175.453 96.1808  17
   0  -9  20 185.378 101.143  23
   0   9  21 257.803 83.1616  10
   0  -9  21 328.323 104.907  23
   0   9  21 352.527 97.3443  17
   0  -9  22 2820.82 184.139  23
   0   9  22 3017.04 179.924  10
   0   9  22 2736.70 177.630  17
   0   9  23 1679.09 134.020  10
   0  -9  23 1652.05 144.227  23
   0   9  23 1482.38 131.665  17
   0   9  24 1398.51 116.861  10
   0  -9  24 1274.95 123.138  23
   0   9 -25 77.2544 43.4363  21
   0  -9  25 56.8409 70.6487  23
   0   9  25 117.284 56.0661  10
   0   9  26 1576.71 102.672  10
   0  -9  26 1478.45 112.898  23
   0   9 -26 1571.97 89.7461  21
   0   9  27 185.107 42.3551  10
   0  -9  27 206.676 61.8037  23
   0   9 -27 218.812 36.5299  21
   0  -9  28 603.074 64.8735  23
   0  10   0 40578.3 983.944  19
   0 -10   0 39869.8 996.925  23
   0 -10   1 19336.3 549.753  23
   0 -10  -1 19539.7 614.388   1
   0  10   1 20191.0 544.422  19
   0 -10  -1 21633.2 572.054  23
   0  10   1 17998.7 624.657   4
   0  10  -1 19679.5 542.215  19
   0  10   2 8029.83 363.435   4
   0 -10   2 8127.92 297.956  23
   0  10  -2 8411.12 293.792  19
   0  10   2 8684.85 294.658  19
   0 -10  -2 9808.84 333.039  23
   0 -10  -2 9185.81 361.978   1
   0  10  -3 7487.30 270.701  19
   0  10   3 7638.91 270.768  19
   0 -10   3 7367.33 277.003  23
   0 -10  -3 7810.95 289.427  23
   0 -10  -4 47308.9 1164.93  23
   0  10   4 47944.5 1148.54  19
   0  10  -4 48674.2 1151.94  19
   0 -10   4 46976.8 1155.37  23
   0  10   5 8481.68 293.536  19
   0 -10  -5 7944.18 300.907  23
   0 -10   5 8537.20 299.760  23
   0  10   6 65919.8 1474.25  13
   0 -10  -6 62330.9 1546.88  23
   0 -10   6 66124.1 1547.84  23
   0  10   6 67919.8 1541.35  19
   0 -10  -7 16267.7 476.176  12
   0 -10  -7 17119.6 442.625  15
   0  10   7 16277.7 421.477  13
   0 -10   7 16148.7 481.929  23
   0  10   8 5765.82 253.253  10
   0 -10  -8 6029.07 240.565  12
   0 -10   8 5948.63 247.067  23
   0  10   8 5725.69 195.662  13
   0 -10  -8 5998.35 211.102  15
   0  10   9 1463.82 90.9299  13
   0  10   9 1372.34 128.202  10
   0 -10  -9 1480.11 100.784  15
   0 -10   9 1520.92 129.535  23
   0 -10  -9 1640.75 120.788  12
   0 -10 -10 35387.7 915.707  12
   0  10  10 35727.4 865.095  13
   0  10  10 36391.2 945.964  10
   0 -10  10 36881.8 935.217  23
   0 -10 -10 37044.2 886.300  15
   0 -10 -11 8284.40 299.170  12
   0  10  11 8512.10 324.829  10
   0 -10  11 8568.83 318.847  23
   0 -10  11 7697.98 270.875  15
   0  10  12 17028.2 522.045  10
   0 -10 -12 16302.4 488.024  12
   0 -10  12 16653.7 516.535  23
   0 -10 -13 2761.80 155.363  12
   0  10  13 2515.77 167.954  17
   0  10  13 2633.48 175.445  10
   0 -10  13 2809.63 182.441  23
   0 -10  14 1421.96 141.744  23
   0  10  14 1525.06 141.234  10
   0  10  14 1699.47 142.789  17
   0 -10  15 32221.5 876.329  23
   0  10  15 32476.9 882.446  10
   0  10  15 32967.7 869.106  17
   0  10  16 1800.14 149.418  10
   0 -10  16 1751.74 158.920  23
   0  10  16 1864.39 151.755  17
   0  10  17 18933.9 581.189  10
   0 -10  17 18892.7 580.765  23
   0  10  17 18658.8 568.573  17
   0 -10  18 511.528 110.537  23
   0  10  18 414.732 95.0431  10
   0  10  18 481.579 97.9007  17
   0  10  19 14297.2 468.946  10
   0  10  19 14419.3 466.082  17
   0 -10  19 13786.0 467.547  23
   0 -10  20 695.337 116.192  23
   0  10  20 723.716 104.289  10
   0  10  20 780.531 114.571  17
   0  10 -20 722.936 77.7315  21
   0 -10  21 6986.52 292.764  23
   0  10  21 6833.85 283.898  10
   0  10 -21 6929.56 247.940  21
   0  10  21 7543.71 291.461  17
   0 -10  22 4276.60 217.379  23
   0  10  22 4568.79 215.452  17
   0  10  22 4593.83 213.510  10
   0  10 -22 4188.04 176.551  21
   0  10  23 6985.82 263.361  10
   0  10  23 6573.86 260.332  17
   0  10 -23 6541.99 226.354  21
   0 -10  23 6987.31 273.095  23
   0 -10  24 10468.5 345.569  23
   0  10  24 10130.5 334.999  17
   0  10  24 10377.8 332.397  10
   0 -10  25 202.100 69.3385  23
   0  10  25 169.687 51.8986  10
   0 -10  26 20847.9 536.328  23
   0  10  26 19851.2 510.487  10
   0 -10 -26 20429.4 512.642  24
   0 -10  27 26474.2 647.833  23
   0 -10  28 6764.16 201.487  23
   0  11   0 63.2125 64.3614  19
   0 -11   0 163.307 82.8198  23
   0 -11   1 66337.1 1568.82  23
   0  11  -1 64660.4 1546.30  19
   0  11   1 62638.7 1544.94  19
   0 -11   2 31121.6 811.459  23
   0 -11  -2 31697.6 827.618  23
   0  11   2 30661.9 795.653  19
   0  11  -2 30002.6 793.394  19
   0  11  -3 892.039 101.311  19
   0 -11  -3 836.208 113.011  23
   0 -11   3 724.267 102.137  23
   0  11   3 757.672 96.4351  19
   0  11  -4 2129.56 143.806  19
   0 -11  -4 1878.47 146.930  23
   0 -11   4 2259.67 154.353  23
   0  11   4 2279.09 148.256  19
   0  11   5 1378.11 122.397  19
   0  11  -5 1490.55 123.703  19
   0 -11   5 1365.18 126.060  23
   0 -11  -5 1401.23 131.823  23
   0 -11  -6 9369.31 348.358  23
   0  11  -6 9717.55 339.557  19
   0 -11   6 9995.37 350.130  23
   0  11   6 9845.40 340.773  19
   0  11   7 16488.5 520.181  10
   0  11   7 16571.2 434.305  13
   0 -11   7 17733.4 514.954  23
   0 -11  -7 16404.7 498.819  12
   0 -11  -7 16308.5 511.760  23
   0 -11  -8 241.743 62.4587  12
   0 -11   8 226.317 89.3620  23
   0  11   8 250.150 82.4917  10
   0  11   8 237.352 46.5223  13
   0 -11  -9 22063.8 632.583  12
   0 -11   9 23562.8 654.150  23
   0  11   9 22479.1 576.035  13
   0  11   9 23748.2 668.831  10
   0  11  10 16762.0 522.487  10
   0 -11  10 15598.0 508.170  23
   0 -11 -10 16691.3 496.080  12
   0  11  11 29058.1 802.089  10
   0 -11  11 29304.2 793.700  23
   0 -11 -11 28417.0 765.526  12
   0 -11  12 39079.7 1031.15  23
   0 -11 -12 39858.0 1001.88  12
   0  11  12 40336.5 1041.59  10
   0 -11  13 5387.69 260.959  23
   0  11  13 5735.25 266.099  10
   0  11  13 5435.05 254.824  17
   0 -11  14 1928.75 163.277  23
   0  11  14 1832.01 149.463  17
   0  11  14 1693.51 149.000  10
   0  11  15 49792.3 1271.30  10
   0 -11  15 50578.1 1270.50  23
   0  11  15 51231.2 1261.93  17
   0  11  16 26959.7 752.072  10
   0 -11  16 26414.4 750.981  23
   0  11  16 26170.4 738.265  17
   0 -11  17 11989.6 425.322  23
   0  11  17 11934.8 411.415  17
   0  11  17 11392.8 411.954  10
   0  11  18 1476.70 135.976  10
   0 -11  18 1474.20 147.855  23
   0  11  18 1498.12 140.811  17
   0  11  19 8310.81 320.864  10
   0 -11  19 8239.19 325.611  23
   0  11  19 8092.26 316.588  17
   0  11  20 3054.96 180.382  17
   0 -11  20 3131.75 190.885  23
   0  11  20 3204.91 181.923  10
   0  11  21 7006.23 271.317  10
   0 -11  21 6393.16 271.750  23
   0  11  21 6747.97 269.888  17
   0  11  22 10612.0 346.146  10
   0 -11  22 10313.3 354.396  23
   0  11  22 10529.3 348.763  17
   0  11  23 60.6432 53.7628  10
   0  11  23 89.3564 64.7848  17
   0 -11  23 82.8073 70.4715  23
   0  11  24 374.667 58.7511  10
   0  11  24 396.517 69.2498  17
   0 -11  24 394.022 73.2345  23
   0 -11  25 7145.11 237.754  23
   0  11  25 6639.89 213.325  10
   0  11 -26 1933.95 90.9833  19
   0 -11 -26 1840.73 87.7555  24
   0 -12   0 40821.0 1010.36  23
   0  12   0 35094.0 945.870  19
   0 -12   1 51010.3 1228.15  23
   0  12  -1 46133.8 1185.08  19
   0 -12  -1 50502.2 1231.84  23
   0  12   1 47320.0 1188.27  19
   0 -12  -2 2425.47 177.721  23
   0  12   2 2493.94 161.554  19
   0  12  -2 2537.07 163.590  19
   0 -12   2 2904.69 184.788  23
   0 -12  -3 104907. 2362.75  23
   0 -12   3 102916. 2354.01  23
   0  12   3 100491. 2332.90  19
   0  12  -3 99514.6 2329.54  19
   0 -12  -4 10748.8 381.609  23
   0 -12   4 9918.63 366.330  23
   0  12   4 9825.37 355.400  19
   0  12  -4 10377.6 360.841  19
   0 -12   5 71190.2 1669.97  23
   0 -12  -5 66752.0 1664.99  23
   0  12   5 70495.2 1655.54  19
   0  12  -5 70261.9 1655.56  19
   0 -12  -6 64450.6 1589.59  23
   0 -12  -6 65662.4 1578.98  12
   0  12  -6 66983.7 1576.91  19
   0 -12   6 65695.9 1584.77  23
   0  12   7 5246.02 253.973  10
   0  12  -7 4735.08 231.183  19
   0 -12   7 4764.67 240.021  23
   0 -12  -7 4780.07 229.825  12
   0 -12  -8 19377.0 573.302  12
   0 -12   8 19783.8 588.534  23
   0  12  -8 19237.8 575.133  19
   0  12   8 19433.8 598.217  10
   0 -12  -9 49538.2 1250.87  12
   0  12   9 52255.4 1291.47  10
   0  12  -9 51323.1 1264.16  19
   0 -12   9 50960.2 1272.37  23
   0  12  10 47789.0 1207.04  10
   0 -12 -10 45236.0 1164.96  12
   0 -12  10 48946.9 1198.53  23
   0 -12 -11 425.990 78.7282  12
   0  12  11 664.682 109.867  10
   0 -12  11 706.268 122.505  23
   0  12  12 1243.26 134.731  10
   0  12  12 1480.38 137.661  17
   0 -12  12 1493.65 150.071  23
   0 -12 -12 1214.86 109.087  12
   0  12  13 424.374 105.803  17
   0 -12  13 426.875 108.126  23
   0  12  13 291.401 87.8231  10
   0  12  14 13779.5 465.060  10
   0  12  14 13487.6 450.184  17
   0 -12  14 13761.9 463.047  23
   0  12  15 236.130 84.6794  10
   0  12  15 403.884 102.324  17
   0 -12  15 341.733 108.962  23
   0  12  16 21236.2 628.550  17
   0  12  16 22515.0 645.342  10
   0 -12  16 21653.5 644.468  23
   0 -12  17 4059.39 223.342  23
   0  12  17 4349.51 218.477  17
   0  12  17 4053.88 217.105  10
   0  12  18 155.847 84.6176  17
   0 -12  18 218.608 95.2744  23
   0  12  18 233.673 75.8812  10
   0  12  19 16566.7 499.037  17
   0  12  19 16473.9 497.707  10
   0 -12  19 16432.4 505.630  23
   0 -12  20 100.933 88.5152  23
   0  12  20 21.6032 59.6639  10
   0  12  20 56.1281 75.6725  17
   0 -12  21 260.109 80.6675  23
   0  12  21 375.301 81.6792  17
   0  12  21 243.042 64.3002  10
   0 -12  22 1950.60 132.556  23
   0  12  22 1801.96 114.428  10
   0  12  22 1848.66 122.547  17
   0  12  23 158.125 58.9233  17
   0 -12  23 141.221 62.9253  23
   0  12 -23 134.055 52.4899  19
   0  12  23 167.561 46.4140  10
   0 -12  24 4692.69 180.387  23
   0  12  24 4793.73 177.029  17
   0  12 -24 4477.21 166.159  19
   0 -12  25 5287.41 180.895  23
   0 -12 -25 5285.27 172.087  24
   0  13   0 5.13284 80.3577  19
   0 -13   0-24.9169 97.8227  23
   0 -13   1 22178.9 652.942  23
   0  13   1 20189.4 601.596  19
   0  13  -1 20058.6 599.943  19
   0 -13  -1 21043.6 633.357  23
   0  13   2 995.510 119.264  19
   0 -13  -2 1258.94 144.174  23
   0  13  -2 1226.93 127.984  19
   0 -13   2 1266.93 148.695  23
   0 -13   3 44844.2 1125.41  23
   0  13   3 41669.2 1083.06  19
   0  13  -3 42835.9 1084.49  19
   0 -13  -3 42269.7 1108.86  23
   0 -13   4 101989. 2352.37  23
   0  13  -4 100983. 2322.51  19
   0  13   4 99996.6 2322.22  19
   0 -13  -4 99079.8 2346.78  23
   0 -13  -5 19854.3 621.671  23
   0  13   5 20848.2 604.421  19
   0  13  -5 21155.1 606.258  19
   0 -13   5 20594.2 624.877  23
   0 -13  -5 20065.2 608.051  12
   0 -13  -6 7643.75 312.307  12
   0  13  -6 7811.99 313.359  19
   0 -13   6 8559.47 336.604  23
   0 -13   7 52884.4 1273.19  23
   0  13  -7 51342.8 1251.67  19
   0  13   7 47469.3 1271.49  10
   0 -13  -7 49040.0 1246.35  12
   0  13   8 8721.69 360.224  10
   0 -13  -8 8878.60 336.764  12
   0 -13   8 9867.84 368.047  23
   0  13  -8 9186.78 346.428  19
   0 -13  -9 9154.49 341.434  12
   0  13   9 9744.38 373.677  10
   0  13  -9 9427.65 355.415  19
   0 -13   9 9672.18 367.030  23
   0  13  10 4150.04 234.363  10
   0  13 -10 4760.54 232.437  19
   0 -13 -10 4597.27 217.617  12
   0 -13  10 4547.85 242.333  23
   0  13  11 3714.83 214.088  10
   0  13 -11 3408.61 199.598  19
   0 -13 -11 3459.76 184.437  12
   0 -13  11 3699.39 223.314  23
   0 -13  12 2642.74 189.562  23
   0  13  12 2632.57 181.400  10
   0  13 -12 2681.28 175.213  19
   0  13  12 2350.56 170.528  17
   0  13  13 20109.6 595.818  10
   0  13 -13 19789.8 583.856  19
   0 -13  13 19606.8 592.129  23
   0  13  13 18390.2 574.853  17
   0 -13  14 3653.57 213.890  23
   0  13  14 3819.38 211.054  10
   0  13 -14 3878.11 208.689  19
   0  13  14 3945.32 208.271  17
   0  13  15 262.016 90.7860  17
   0 -13  15 303.840 101.320  23
   0  13  15 140.115 77.4431  10
   0  13 -15 219.580 81.3371  19
   0  13 -16 3707.01 197.580  19
   0  13  16 3790.66 202.383  10
   0  13  16 4216.54 209.864  17
   0 -13  16 3474.23 204.062  23
   0  13  17 4323.54 213.234  17
   0 -13  17 4007.70 213.329  23
   0  13 -17 4440.72 209.968  19
   0  13  17 4652.25 216.359  10
   0  13  18 7274.45 278.794  10
   0 -13  18 7541.96 292.255  23
   0  13 -18 7521.98 281.027  19
   0  13  18 7340.87 282.723  17
   0  13 -19 502.861 81.3240  19
   0  13  19 492.651 84.2520  17
   0  13  19 458.201 75.2646  10
   0 -13  19 622.054 99.1396  23
   0  13  20 1455.37 106.107  10
   0  13  20 1520.76 114.390  17
   0 -13  20 1634.72 121.945  23
   0  13 -20 1492.04 109.837  19
   0  13 -21 3298.04 151.810  19
   0  13  21 3436.15 159.804  17
   0  13  21 3331.91 148.786  10
   0 -13  21 3337.32 165.324  23
   0  13  22 1741.45 93.0569  10
   0  13 -22 1635.50 97.6230  19
   0  13  22 1664.88 103.741  17
   0 -13  22 1741.44 109.532  23
   0  13  23 12294.4 330.263  17
   0 -13  23 11755.4 333.765  23
   0  13 -23 11235.2 313.524  19
   0 -13  24 1157.00 72.2419  23
   0 -13 -24 1129.39 69.3696  24
   0  14   0 9988.51 366.255  19
   0 -14   0 10216.1 396.666  23
   0 -14  -1 3308.87 213.532  23
   0  14  -1 2879.09 184.227  19
   0 -14   1 3107.04 214.339  23
   0  14   1 2785.60 183.046  19
   0  14   2 462.641 104.030  19
   0 -14  -2 425.703 117.968  23
   0  14  -2 497.861 102.475  19
   0 -14   2 432.516 118.320  23
   0  14  -3 17633.7 546.259  19
   0  14   3 17277.0 545.243  19
   0 -14  -3 17508.6 568.766  23
   0 -14  -4 879.525 136.029  23
   0  14  -4 1078.57 122.879  19
   0 -14  -4 836.948 113.078  12
   0 -14   4 1111.05 151.832  23
   0 -14  -5 9403.21 360.801  12
   0 -14   5 10590.6 396.730  23
   0  14   5 9274.51 377.260  10
   0 -14  -5 9577.73 376.946  23
   0  14  -5 9989.91 360.955  19
   0 -14  -6 5420.31 249.934  12
   0  14   6 5289.42 268.437  10
   0 -14   6 5672.98 280.986  23
   0  14  -6 5243.84 252.510  19
   0  14  -7 5883.94 265.118  19
   0 -14   7 5841.71 280.378  23
   0 -14  -7 5757.02 258.112  12
   0  14   7 6119.79 288.082  10
   0  14  -8 38309.4 984.794  19
   0 -14  -8 35750.0 968.981  12
   0  14   8 37560.2 1008.12  10
   0 -14  -9 1768.03 132.278  12
   0 -14   9 1592.10 161.191  23
   0  14   9 1658.69 152.006  10
   0  14  -9 1615.73 145.357  19
   0 -14 -10 828.654 95.4839  12
   0  14  10 767.525 111.858  10
   0 -14  10 845.311 132.301  23
   0  14 -10 1001.89 120.933  19
   0  14 -11 846.529 112.933  19
   0  14  11 872.784 114.013  17
   0 -14  11 1037.13 131.601  23
   0  14  11 889.551 113.475  10
   0  14  12 1989.34 153.778  17
   0 -14  12 2036.34 166.067  23
   0  14  12 2147.94 157.987  10
   0  14 -12 2351.97 160.183  19
   0  14  13 10386.7 362.940  17
   0  14 -13 10099.3 358.349  19
   0 -14  13 10283.6 375.134  23
   0  14  13 9962.48 364.915  10
   0  14 -14 1875.00 139.257  19
   0  14  14 1778.72 140.401  10
   0  14  14 1702.26 139.056  17
   0 -14  14 1886.68 154.515  23
   0  14 -15 22.0704 70.6102  19
   0  14  15 153.868 75.5335  17
   0  14  15 118.670 69.6043  10
   0 -14  15 84.3289 81.8849  23
   0 -14  16 10191.0 352.000  23
   0  14  16 9925.17 340.013  10
   0  14  16 9679.94 337.381  17
   0  14 -16 10006.1 336.422  19
   0  14  17 71.8849 67.1806  17
   0  14  17 71.7656 60.2701  10
   0  14 -17 3.81503 59.5499  19
   0 -14  17 43.6052 74.3255  23
   0  14  18 28469.3 729.456  10
   0  14 -18 28884.1 728.738  19
   0 -14  18 29413.3 747.850  23
   0  14  18 28225.6 735.235  17
   0 -14  19 5463.07 221.472  23
   0  14  19 5601.04 214.720  17
   0  14 -19 5626.97 207.972  19
   0  14  19 5679.33 206.584  10
   0  14  20-11.6904 49.5552  17
   0  14 -20 52.3285 44.2478  19
   0 -14  20 44.7126 57.6046  23
   0  14  20 29.8605 36.3493  10
   0 -14  21 5746.42 203.061  23
   0  14  21 5694.83 195.957  17
   0  14 -21 5508.88 183.282  19
   0  14  22 11805.6 324.090  17
   0 -14  22 12509.7 335.542  23
   0 -15   0-55.2965 107.147  23
   0  15   0-26.5046 86.0120  19
   0  15  -1 15.8726 83.8506  19
   0 -15   1 30.9856 103.960  23
   0  15   1 79.6844 79.7631  19
   0 -15  -1-24.5076 106.846  23
   0 -15  -2 65042.9 1621.84  23
   0 -15   2 66478.8 1630.55  23
   0  15  -2 66213.3 1594.88  19
   0  15   2 66955.0 1601.00  19
   0  15  -3 34527.0 915.658  19
   0 -15  -3 34342.9 938.183  23
   0 -15  -3 33087.2 922.699  12
   0  15   4 10998.2 420.556  10
   0  15  -4 11924.1 405.832  19
   0 -15  -4 11306.0 405.197  12
   0 -15   5 402.184 123.538  23
   0  15  -5 306.059 96.4942  19
   0  15   5 411.082 101.111  10
   0 -15  -5 438.617 85.7026  12
   0 -15   6 988.043 149.635  23
   0 -15  -6 891.651 102.889  12
   0  15  -6 1094.49 120.363  19
   0  15   6 939.476 125.687  10
   0  15  -7 53510.8 1317.97  19
   0 -15  -7 50354.0 1306.66  12
   0  15   7 53828.7 1344.17  10
   0 -15  -8 600.303 87.1524  12
   0 -15   8 706.095 129.403  23
   0  15   8 749.421 113.261  10
   0  15  -8 713.862 104.839  19
   0  15  -9 9550.32 340.108  19
   0 -15  -9 9083.41 319.576  12
   0 -15   9 9238.84 364.153  23
   0  15   9 9064.49 347.797  10
   0  15  10 4998.04 242.714  10
   0  15  10 5193.44 238.415  17
   0 -15  10 5470.98 262.138  23
   0  15 -10 5115.49 234.127  19
   0  15 -11 2906.97 173.724  19
   0  15  11 3198.00 183.775  10
   0  15  11 3113.13 180.836  17
   0 -15  11 3259.08 200.488  23
   0 -15  12 140.792 94.2928  23
   0  15  12 158.124 79.4028  17
   0  15 -12 52.7817 67.6117  19
   0  15  12 106.685 64.2827  10
   0  15  13 10416.9 353.826  17
   0 -15  13 10788.1 373.269  23
   0  15 -13 10782.8 352.373  19
   0  15  13 10152.3 354.600  10
   0  15  14 793.561 92.7877  10
   0 -15  14 738.701 107.050  23
   0  15 -14 677.794 86.7072  19
   0  15  14 629.096 91.8225  17
   0  15  15 1320.35 107.176  10
   0  15 -15 1134.66 101.324  19
   0 -15  15 1303.12 121.677  23
   0  15  15 1255.01 111.325  17
   0  15  16 3579.79 170.019  17
   0  15 -16 3670.96 165.972  19
   0  15  16 3743.56 168.976  10
   0 -15  16 3790.71 182.904  23
   0  15  17-54.4902 54.7722  17
   0  15 -17 2.93531 46.6578  19
   0 -15  17 3.63747 61.8341  23
   0  15  17 38.5049 41.8573  10
   0 -15  18 3379.18 156.706  23
   0  15  18 2890.16 129.349  10
   0  15  18 3184.27 143.666  17
   0  15 -18 3182.73 135.691  19
   0  15  19 11688.1 325.078  17
   0  15 -19 10929.0 310.267  19
   0 -15  19 12007.4 338.597  23
   0  15  20 2501.14 110.140  17
   0 -15  20 2859.77 125.949  23
   0  16   0-14.7158 72.4045  19
   0 -16   0-34.2970 95.6329  23
   0 -16   1 28.6072 95.7206  23
   0 -16  -1-16.5125 70.0325  12
   0  16  -1-14.6630 75.8082  19
   0 -16  -1-51.3725 97.0330  23
   0  16  -2 543.585 94.8370  19
   0 -16  -2 508.189 90.6420  12
   0  16   2 473.704 103.326  10
   0 -16   2 594.183 115.351  23
   0 -16  -2 460.903 109.652  23
   0  16  -3 1549.01 131.706  19
   0  16   3 1503.88 144.953  10
   0 -16   3 1617.39 155.176  23
   0 -16  -3 1486.51 131.224  12
   0 -16   4 62.9045 85.0331  23
   0  16  -4 199.511 84.3090  19
   0 -16  -4 84.7201 64.3448  12
   0  16   4 183.332 88.3375  10
   0  16  -5 10281.9 354.335  19
   0 -16   5 10724.1 385.945  23
   0 -16  -5 9479.46 344.114  12
   0  16   5 9941.06 370.151  10
   0  16   6 3955.23 213.644  10
   0  16  -6 4263.91 207.541  19
   0 -16  -6 3910.80 194.520  12
   0  16  -7 4965.78 224.231  19
   0 -16   7 5417.46 256.940  23
   0  16   7 4896.16 232.405  10
   0  16  -8 11414.7 375.973  19
   0 -16   8 12136.6 414.203  23
   0  16   8 11274.9 389.458  10
   0  16  -9 20721.6 587.343  19
   0  16   9 21092.5 603.901  10
   0  16   9 20751.7 592.604  17
   0  16 -10 5127.08 216.778  19
   0  16  10 4779.07 217.154  17
   0  16  10 4995.64 222.974  10
   0  16 -11 34.1550 60.7066  19
   0  16  11 96.5997 61.8003  10
   0  16  11 59.2796 67.9013  17
   0 -16  11 188.107 94.0353  23
   0  16  12 9094.99 314.654  10
   0  16 -12 9292.31 308.821  19
   0  16  12 9240.50 313.216  17
   0  16  13 2430.08 137.568  10
   0 -16  13 2913.73 165.910  23
   0  16  13 2463.21 139.267  17
   0  16 -13 2526.63 136.541  19
   0  16  14 2963.64 146.802  17
   0 -16  14 3103.47 167.733  23
   0  16  14 2761.22 138.939  10
   0  16 -14 2949.02 141.397  19
   0  16  15 2043.02 108.698  10
   0  16 -15 2017.02 109.491  19
   0  16  15 2017.54 116.790  17
   0  16  16 3757.84 154.003  17
   0  16 -16 3816.85 146.439  19
   0  16  16 3595.58 141.286  10
   0  16  17 644.082 61.4080  17
   0 -16  17 664.523 75.9218  23
   0  16 -17 598.855 52.3210  19
   0 -16  18 9693.46 271.916  23
   0  16  18 8281.02 246.474  17
   0  17   0 15.4224 68.9810  10
   0 -17   0 32.9412 60.1564  12
   0  17   1 8208.93 313.411  10
   0 -17   1 7489.59 296.695  12
   0 -17  -1 8042.26 297.878  12
   0 -17   1 8023.04 311.781  23
   0 -17   2 4095.42 205.930  12
   0  17   2 4098.25 209.863  10
   0 -17  -2 4019.14 196.160  12
   0 -17   2 4146.47 215.352  23
   0 -17  -3 13284.8 408.481  12
   0 -17   3 12860.6 428.999  23
   0  17  -3 13001.6 404.706  19
   0  17   3 13175.3 426.359  10
   0 -17  -4 3695.47 178.879  12
   0 -17   4 4082.13 205.786  23
   0  17  -4 3829.67 184.746  19
   0  17   4 3894.63 198.341  10
   0  17  -5 5182.56 217.374  19
   0  17   5 5399.35 231.709  10
   0 -17   5 5373.38 238.363  23
   0 -17  -5 5092.69 208.415  12
   0  17  -6 30.0451 62.8322  19
   0  17   6-4.35544 60.3735  10
   0 -17   6-27.6629 81.9845  23
   0  17   7 3439.51 171.548  17
   0  17  -7 3717.48 175.347  19
   0 -17   7 4092.59 199.623  23
   0  17   7 3783.84 183.010  10
   0 -17   8 7534.35 280.022  23
   0  17   8 6943.65 260.365  10
   0  17   8 7097.79 257.657  17
   0  17  -8 7231.99 255.332  19
   0 -17   9 6170.07 244.253  23
   0  17  -9 5561.31 214.380  19
   0  17   9 5832.06 221.069  17
   0  17   9 5797.57 225.464  10
   0  17  10 252.177 60.9165  17
   0 -17  10 287.401 75.8160  23
   0  17 -10 204.158 58.1681  19
   0  17  10 237.986 58.8201  10
   0 -17  11 12647.7 377.016  23
   0  17  11 11551.4 347.344  10
   0  17  11 11881.4 350.000  17
   0  17 -11 11937.3 344.479  19
   0  17 -12 5106.18 183.073  19
   0  17  12 5228.37 191.018  17
   0  17  12 4757.00 182.408  10
   0  17  13 9936.68 292.911  17
   0  17  13 9348.98 279.956  10
   0  17 -13 10103.7 285.532  19
   0 -17  14 4914.27 182.146  23
   0  17  14 4624.83 164.205  17
   0  17 -14 4398.54 153.814  19
   0  17  15 782.390 59.4576  17
   0 -17  15 615.923 64.9239  23
   0 -18   0 3772.63 168.501  12
   0  18   0 3677.59 177.537  10
   0 -18   1 2871.71 148.338  12
   0  18  -1 2881.96 157.226  10
   0 -18  -1 2950.94 145.342  12
   0  18   1 3027.86 156.583  10
   0  18   2 586.647 78.2657  10
   0  18  -2 448.295 78.2916  10
   0 -18  -2 459.314 63.3992  12
   0 -18   2 452.003 71.6304  12
   0 -18  -3 14420.0 398.367  12
   0 -18   3 14730.1 423.770  12
   0  18   3 14252.8 420.934  10
   0  18  -3 15487.3 438.447  10
   0 -18  -3 13501.1 381.223  14
   0 -18   4 413.576 83.3657  23
   0  18   4 584.228 73.5073  10
   0 -18   4 545.160 74.0378  12
   0 -18   5 193.587 58.2870  12
   0 -18   5 307.559 76.0965  23
   0  18   5 213.611 56.6865  17
   0  18   5 285.210 60.5697  10
   0  18   6 2918.76 136.089  17
   0 -18   6 2760.39 150.124  23
   0  18   6 2744.84 136.068  10
   0 -18   6 2925.62 149.292  12
   0  18   7 222.014 51.9619  10
   0 -18   7 119.930 61.0448  23
   0  18   7 196.506 50.2615  17
   0  18   8 1228.27 83.0186  10
   0  18   8 1258.87 85.0676  17
   0 -18   8 1267.34 97.9468  23
   0 -18   9 306.192 60.1519  23
   0  18   9 300.420 46.5794  10
   0  18   9 266.713 49.7386  17
   0  18  10 2287.44 106.050  17
   0 -18  10 2432.51 122.360  23
   0 -18  11 1628.01 93.6200  23
   0  18  11 1445.42 79.2031  17
   0 -18  12 16171.3 417.204  23
   0  19   0 9.62766 33.2327  10
   0  19   1 1580.31 90.1344  10
   0  19  -1 1612.34 92.7585  10
   0  19   1 1852.68 88.7269  17
   0  19   2 2893.05 124.934  10
   0  19  -2 2733.32 128.144  10
   0  19  -3 4075.98 160.737  10
   0  19   3 4834.59 155.501  17
   0  19  -4 76.6207 37.8035  10
   0  19   4 157.498 34.8059  17
   0  19  -5 3373.23 135.652  10
  -1   0   0-16.2745 29.3440   4
  -1   0   0 24.0230 23.4913   6
  -1   0  -1 282203. 5822.70   4
  -1   0  -1 265230. 5831.46   3
  -1   0  -1 273156. 5818.26   6
  -1   0  -1 274531. 5813.62   7
  -1   0   1 264629. 5804.75   6
   1   0   2 141247. 3057.25   4
  -1   0  -2 140604. 3069.64   3
  -1   0   2 143435. 3030.95   6
  -1   0  -2 142328. 3048.30   7
  -1   0  -2 134249. 3056.44   6
   1   0   2 145134. 3080.19   3
   1   0   3 90096.3 1989.18   3
   1   0   3 89948.5 1958.12   7
   1   0   3 88858.0 1956.99   4
  -1   0   3 91058.1 1925.23   6
  -1   0   3 88730.7 1948.33   2
  -1   0  -3 91891.7 1951.84   7
  -1   0  -3 83486.2 1973.49   3
  -1   0  -4 160991. 3404.79   7
  -1   0  -4 164007. 3418.13   1
   1   0   4 153709. 3412.94   7
   1   0   4 147360. 3449.80   3
  -1   0   4 155467. 3406.43   2
  -1   0  -4 163674. 3437.40   3
  -1   0  -5 22377.8 547.605   6
   1   0   5 23715.9 542.693   7
  -1   0  -5 22402.6 577.364   2
   1   0   5 22033.8 576.217   3
  -1   0   5 22667.0 536.002   2
  -1   0  -5 23405.4 537.609   1
  -1   0  -5 21620.4 528.629   7
   1   0   6 188534. 4093.64   7
  -1   0   6 181560. 4092.55   2
  -1   0  -6 192403. 4143.23   2
   1   0   6 185719. 4144.25   3
  -1   0  -6 200156. 4092.76   1
  -1   0  -6 186580. 4102.23   6
  -1   0   7 605127. 12470.7   2
   1   0   7 595047. 12521.0   3
  -1   0  -7 581362. 12451.8   1
  -1   0  -7 602013. 12508.4   2
  -1   0   8 411.026 54.5953   2
   1   0  -8 252.199 46.1865   2
   1   0   8 377.100 70.0257   3
  -1   0  -8 231.552 57.9122   2
   1   0   9 71159.4 1758.54   3
  -1   0  -9 72210.4 1737.39   2
   1   0  -9 78112.5 1707.29   2
  -1   0   9 78732.2 1728.31   2
   1   0   9 74740.3 1734.95   1
   1   0  10 32991.1 859.491   3
   1   0  10 32399.8 826.263   1
  -1   0  10 33507.8 820.705   2
   1   0 -10 35214.9 800.614   2
  -1   0  11 2724.44 157.895   2
   1   0 -11 2983.41 146.522   2
   1   0  11 2768.50 162.231   1
   1   0  11 2652.48 174.614   3
   1   0  12 49606.5 1113.84  22
   1   0  12 49058.8 1114.36  16
  -1   0  12 51229.5 1230.60   1
  -1   0  12 50197.9 1150.05  17
  -1   0  12 50777.4 1251.17   2
   1   0  12 48407.6 1238.21   1
   1   0 -12 51115.9 1204.56   2
   1   0  12 50558.8 1168.65  10
   1   0 -13 39263.9 952.846   2
   1   0  13 37602.8 910.127  10
  -1   0  13 36725.5 893.095  10
  -1   0  13 39532.6 983.802   1
  -1   0  13 38266.5 892.503  17
   1   0  13 37564.0 852.216  16
   1   0  13 36150.0 851.380  22
  -1   0 -13 37233.2 915.666   5
   1   0 -13 37190.5 897.027   9
   1   0  13 36491.5 880.704  17
  -1   0  13 37054.4 1000.07   2
   1   0  13 37564.7 990.174   1
  -1   0  14 25.1953 44.8456  10
   1   0  14-4.36050 47.9752   7
  -1   0  14 66.6724 47.7398   1
   1   0  14 72.5658 40.9116  17
   1   0  14 47.6536 31.2649  16
   1   0 -14 20.0979 40.0553   2
   1   0  14 22.1131 49.2464  10
  -1   0 -14 41.1171 37.3553   5
   1   0  14 13.6172 47.3771   1
   1   0 -14 9.54270 30.3107   9
   1   0  14-14.1399 40.2082  22
  -1   0  14-14.4488 53.3193   2
   1   0  15 57409.3 1333.08  17
  -1   0  15 56257.1 1347.34  10
   1   0 -15 57514.5 1343.25   9
  -1   0 -15 55774.5 1358.09   5
   1   0  15 57301.8 1363.10  10
   1   0  15 59697.6 1295.35  16
  -1   0 -16 9079.67 307.573   5
   1   0  16 8249.91 282.421  17
   1   0 -16 8237.55 285.493   9
  -1   0  16 9132.87 304.037  10
   1   0 -16 8818.04 278.664  24
   1   0  16 8983.00 253.409  16
   1   0 -17 34137.3 839.288  24
   1   0  17 34558.7 808.096  16
  -1   0  17 35239.1 870.542  10
   1   0 -17 33441.7 850.992   9
   1   0 -18 7092.11 259.191   9
   1   0 -18 7126.41 250.119  24
   1   0  18 7547.64 231.722  16
  -1   0  18 7598.68 284.540  10
   1   0  19 2324.07 154.722  23
  -1   0  19 2448.56 151.256  10
   1   0 -19 2239.61 130.921   9
   1   0 -19 2544.22 133.007  24
   1   0  19 2277.75 115.503  16
  -1   0  20 3230.22 180.985  10
   1   0  20 3146.10 141.301  16
   1   0  20 2980.94 177.857  23
  -1   0  20 3377.72 186.432  23
  -1   0  21 31477.5 836.055  10
   1   0  21 30503.7 764.388  16
  -1   0  21 31822.3 835.257  23
   1   0  21 31962.2 839.425  23
   1   0  22 14526.2 467.606  23
  -1   0  22 13938.5 464.511  10
  -1   0  22 14559.9 464.889  23
  -1   0  23 16502.3 502.862  23
  -1   0  23 15244.0 495.626  10
   1   0  23 15636.4 502.232  23
  -1   0  24 8698.25 333.833  23
   1   0  24 8642.01 335.149  23
  -1   0  24 8413.52 326.634  10
  -1   0  25 11800.9 395.342  23
   1   0  25 11290.9 395.188  23
  -1   0  25 11056.8 384.822  10
   1   0  25 10397.8 408.893  10
  -1   0  26 64.0502 78.3465  23
   1   0  26 71.2939 80.7332  23
   1   0  26 183.698 92.7972  10
  -1   0  26 112.580 64.6022  10
  -1   0  27 16469.9 495.283  10
  -1   0  27 17230.3 507.990  23
   1   0  27 16658.6 508.603  23
   1   0  27 17338.1 533.077  10
   1   0  28 34.5697 69.7110  23
   1   0  28 34.9891 76.7936  10
  -1   0  28 12.4429 68.4493  23
  -1   0  28 39.0986 52.2456  10
  -1   0  29 7686.37 270.169  23
   1   0  29 7209.84 270.391  23
   1   0  29 7862.13 290.293  10
   1   0  30 439.498 77.8441  10
   1   0  30 381.499 73.2122  23
  -1   0  30 426.190 68.7969  23
   1   0  31 5525.05 203.768  10
   1   0  31 5584.35 195.421  23
  -1   0  31 5337.19 187.282  23
   1   0  32 9202.84 261.813  23
   1   0 -32 9488.82 263.101  13
   1  -1  32 7042.27 209.849  23
   1   1 -32 6821.10 203.526  21
  -1   1  31 1365.32 86.1914  23
   1  -1  31 1266.79 87.8549  23
  -1   1  30 1632.74 107.896  23
   1  -1  30 1700.07 111.372  23
   1  -1  30 1576.13 117.121  10
   1  -1  29 14960.5 455.294  10
  -1   1  29 15160.5 435.235  23
   1  -1  29 15003.3 440.479  23
  -1   1  29 14432.7 414.877  10
  -1   1  28 1984.64 138.941  23
  -1   1  28 2040.70 130.619  10
   1  -1  28 2099.97 144.408  23
   1  -1  28 2208.80 153.301  10
  -1   1  27 10171.7 338.456  10
   1  -1  27 9134.16 358.333  10
   1  -1  27 9975.19 352.748  23
  -1   1  27 9834.98 346.565  23
   1  -1  26 8285.67 316.350  23
  -1   1  26 8376.64 314.803  23
  -1   1  26 7760.88 298.590  10
   1  -1  25 10298.3 371.688  23
  -1   1  25 10261.7 371.342  23
  -1   1  25 10190.6 362.709  10
   1  -1  24 3029.53 190.637  23
  -1   1  24 2994.28 185.163  23
  -1   1  24 3022.78 181.168  10
   1  -1  23 11595.7 409.115  23
  -1   1  23 12086.4 408.955  23
  -1   1  23 11597.7 402.191  10
   1  -1  22 15158.2 480.494  23
  -1   1  22 14785.9 474.027  10
  -1   1  22 14776.4 475.838  23
  -1   1  21 17792.2 539.880  10
   1  -1  21 18049.8 544.984  23
   1  -1  20 2505.67 163.190  23
   1  -1  20 2227.72 121.727  16
  -1   1  20 2271.98 153.431  10
   1  -1  19 11726.2 394.386  23
  -1   1  19 12502.2 396.527  10
   1  -1  19 11895.3 343.186  16
   1  -1  18 12197.5 388.559  23
   1  -1  18 11823.5 336.416  16
  -1   1  18 11788.3 386.536  10
   1   1 -18 12041.3 364.845   9
   1   1 -17 121108. 2757.48   9
   1  -1  17 126484. 2718.93  16
   1  -1  17 128324. 2782.75  23
  -1   1  17 125104. 2779.48  10
   1   1 -16 8242.27 272.278   9
   1   1 -16 7737.68 254.384  24
   1  -1  16 8282.94 284.257  23
  -1   1  16 7966.01 280.206  10
   1  -1  16 8032.61 241.957  16
  -1  -1 -16 8675.97 295.160   5
   1  -1  16 8091.67 298.425  10
  -1   1  16 8310.36 281.616  17
  -1  -1 -15 132821. 3026.72   5
   1  -1  15 135776. 2958.46  16
  -1   1  15 135870. 3008.84  10
   1  -1  15 133386. 3031.77  10
  -1   1  15 136939. 3006.40  17
   1  -1  15 128691. 3108.91   1
   1  -1  15 139800. 3011.88  23
   1   1 -15 136583. 3001.54   9
  -1   1  15 138123. 3125.40   3
   1   1 -15 135660. 2980.54  24
   1   1 -14 24807.5 639.360   9
   1  -1  14 23959.6 715.474   1
  -1  -1 -14 25287.4 729.263   2
  -1   1  14 26373.8 733.440   3
   1  -1  14 25067.0 684.542   7
   1  -1  14 26058.8 664.179  10
  -1   1  14 25529.7 741.460   1
   1  -1  14 25010.3 601.965  16
  -1  -1 -14 26014.1 666.835   5
   1  -1  14 24774.0 774.696   3
  -1   1  14 25294.1 644.994  10
  -1   1  14 26099.3 643.891  17
   1   1 -14 25028.8 622.255  24
  -1   1  13 65264.9 1453.91  17
   1  -1  13 65471.9 1500.60   7
   1  -1  13 63688.8 1444.05  17
   1  -1  13 63748.9 1595.47   3
  -1   1  13 65698.8 1559.51   1
   1  -1  13 60482.6 1526.15   1
   1  -1  13 62257.4 1413.55  16
   1   1 -13 62174.9 1454.17   9
  -1  -1 -13 65262.9 1480.64   5
  -1  -1 -13 62304.3 1546.82   2
   1  -1  13 65133.4 1474.23  10
  -1   1  13 62921.5 1453.97  10
  -1   1  13 64589.1 1539.69   3
   1  -1  12 10726.4 274.781  22
   1  -1  12 10929.5 277.789  16
   1  -1  12 10985.1 337.219   7
  -1   1  12 11111.6 376.799   1
   1  -1  12 9646.52 348.722   1
   1  -1  12 10438.3 318.869  10
   1  -1  12 9953.09 388.516   3
  -1  -1 -12 10568.0 324.973   5
  -1   1  12 10563.0 304.692  17
  -1  -1 -12 9500.54 362.580   2
   1  -1  11 691.918 92.7611   3
   1  -1  11 625.796 72.6262   7
  -1   1  11 671.855 86.1346   2
  -1   1  11 641.921 79.8348   1
  -1  -1 -11 634.374 65.1572   5
   1  -1  11 543.145 71.0064   1
   1  -1  10 2883.18 136.624   7
   1  -1  10 2931.53 171.623   3
  -1   1  10 3015.66 93.4950   6
   1  -1  10 2701.94 142.976   1
  -1  -1 -10 2932.44 133.538   5
  -1   1  10 2919.57 158.277   2
  -1   1   9 78635.0 1804.26   2
  -1   1   9 80463.3 1709.93   6
   1  -1   9 69453.9 1762.65   7
  -1  -1  -9 86732.1 1785.75   1
  -1  -1  -9 81986.2 1774.08   5
   1  -1   9 75716.1 1824.93   3
   1  -1   9 75936.1 1783.09   1
  -1   1   8 34783.2 766.262   6
   1  -1   8 34773.9 870.453   3
  -1   1   8 34492.8 840.722   2
  -1  -1  -8 35623.5 829.960   1
   1  -1   8 33394.8 829.396   1
   1  -1   7 88560.7 1996.65   1
  -1   1   7 87176.0 1999.81   2
  -1  -1  -7 92555.3 2004.19   1
   1  -1   7 92789.8 2039.93   3
   1  -1   6 201992. 4261.54   3
  -1   1   6 193515. 4221.21   2
  -1  -1  -6 206090. 4240.56   1
  -1   1   6 191734. 4172.94   5
   1  -1   5 19151.5 479.715   3
  -1   1   5 19088.4 444.254   2
  -1  -1  -5 19816.7 475.346   1
   1  -1   4 118169. 2519.98   3
  -1  -1  -4 117866. 2524.91   1
  -1   1   4 111110. 2478.65   2
  -1  -1  -4 115822. 2531.51   3
   1  -1   3 371459. 7768.92   4
   1   1  -3 362590. 7755.41   6
   1  -1   3 369991. 7808.83   3
  -1  -1  -3 361156. 7826.44   3
  -1  -1  -3 348628. 7774.88   7
  -1   1   3 368929. 7767.17   2
   1   1  -2 560644. 12240.1   6
  -1  -1  -2 592164. 12300.6   3
  -1   1   2 597055. 12236.3   2
  -1  -1  -2 547768. 12247.8   7
   1  -1   2 575784. 12272.8   3
  -1  -1  -1 503722. 10974.0   7
   1   1  -1 497980. 10974.9   6
  -1  -1  -1 516009. 11008.6   4
  -1  -1  -1 514966. 11024.5   3
   1  -1   1 535194. 10991.3   3
  -1   1   1 526049. 10971.4   3
  -1  -1   0 147379. 3206.36   4
  -1   1   0 147851. 3163.88   3
  -1  -1   0 144729. 3161.96   7
   1   1   0 150739. 3173.79   6
   1   1   1 522508. 10824.9   4
  -1  -1   1 522533. 10833.2   4
  -1   1  -1 527094. 10786.3   4
   1   1   1 481550. 10795.6   6
  -1   1  -1 497766. 10789.0   3
  -1  -1   1 496881. 10779.0   5
  -1  -1   2 599463. 12391.0   5
   1   1   2 549982. 12421.1   6
   1   1   2 578983. 12408.0   7
   1   1   2 583380. 12438.2   4
  -1   1  -2 567106. 12423.9   2
  -1   1  -3 371549. 7684.78   2
  -1   1  -3 364513. 7644.04   1
   1   1   3 369847. 7661.44   7
   1   1   3 325936. 7704.45   3
   1   1   3 354381. 7683.11   4
   1   1   3 341580. 7673.11   6
   1   1   4 123699. 2671.80   7
   1   1   4 121980. 2728.91   3
  -1   1  -4 127238. 2652.21   1
  -1  -1   4 118898. 2680.36   2
  -1   1  -4 119241. 2694.80   2
  -1   1  -5 18849.6 480.075   2
   1   1   5 18429.2 509.086   3
  -1  -1   5 19089.8 464.647   2
   1   1   5 18854.5 454.213   7
  -1   1  -5 19133.9 434.742   1
  -1   1  -5 18429.5 468.946   6
  -1   1  -6 193882. 4224.70   6
  -1  -1   6 193546. 4219.36   2
   1   1   6 185942. 4272.49   3
   1  -1  -6 200855. 4202.77   2
   1   1   6 189207. 4222.99   6
   1   1   6 196588. 4206.83   7
  -1   1  -6 198010. 4241.87   2
   1   1   7 90800.8 2036.48   6
  -1  -1   7 89675.3 2035.64   2
  -1   1  -7 93885.2 2038.26   6
   1   1   7 90487.4 2019.27   7
   1  -1  -7 92813.7 2018.63   2
  -1   1  -7 92344.9 2054.70   2
  -1  -1   8 33933.4 850.359   2
   1  -1  -8 36268.7 835.428   2
  -1   1  -8 36534.9 871.561   2
   1   1   8 35089.5 833.017   7
  -1   1  -8 36432.6 849.921   6
   1   1   8 35240.8 849.541   6
  -1   1  -9 79446.7 1862.32   2
   1  -1  -9 79916.6 1827.24   2
   1   1   9 82479.2 1826.31   7
  -1   1  -9 83607.1 1842.01   6
  -1  -1   9 81458.4 1854.22   2
   1   1   9 82555.3 1843.04   6
   1   1  10 2949.45 141.848   6
  -1  -1  10 2762.89 149.377   2
   1   1  10 2988.86 133.947   7
  -1   1 -10 2860.10 137.504   6
   1  -1 -10 3020.21 136.873   2
  -1   1 -10 2981.38 154.702   2
  -1   1 -11 704.162 78.6466   2
   1   1  11 698.649 67.7486   7
  -1  -1  11 556.503 75.6037   2
   1   1  11 672.111 67.8290  10
   1   1  12 10299.4 296.485  17
   1   1  12 10546.0 319.035  10
   1  -1 -12 10699.9 316.767  12
   1   1  12 10053.0 270.158  16
  -1   1 -12 10676.0 361.391   2
  -1  -1  12 9745.02 364.053   2
   1  -1 -12 11012.2 339.700   2
   1   1  12 10774.5 328.066   7
  -1   1 -13 64639.6 1529.71   2
   1  -1 -13 64928.4 1460.86  12
   1   1  13 63341.7 1479.22   7
   1   1  13 62731.3 1463.33  10
  -1  -1  13 63710.4 1448.32  10
   1  -1 -13 65028.3 1497.54   2
   1   1  13 58497.2 1587.60   3
   1   1  13 62364.3 1436.48  17
  -1  -1  13 64269.7 1526.64   1
   1   1  13 62124.1 1401.72  16
  -1  -1  13 64323.1 1560.41   2
   1   1  14 25114.8 792.217   3
   1   1  14 23617.6 649.340  10
   1   1  14 23201.9 663.171   7
   1  -1 -14 25974.8 690.487   2
   1  -1 -14 25914.8 652.045  12
   1   1  14 25274.2 594.313  16
  -1  -1  14 25823.5 643.099  10
  -1  -1  14 25844.0 759.713   2
   1   1  14 25304.9 631.044  17
  -1   1 -14 24383.3 709.870   2
   1  -1 -14 24990.7 646.726   9
  -1  -1  14 25166.1 712.862   1
  -1  -1  15 139812. 2981.90  10
  -1   1 -15 136548. 2997.42   5
   1   1  15 136902. 2964.96  17
  -1  -1  15 129805. 3129.81   2
  -1  -1  15 134553. 3078.65   1
   1  -1 -15 134701. 2979.65   9
   1   1  15 138887. 2919.80  16
   1  -1 -15 136267. 3043.31   2
  -1  -1  16 8024.54 279.852  10
   1  -1 -16 7434.70 311.911   2
  -1   1 -16 8210.35 287.714   5
   1   1  16 7845.85 232.735  16
   1  -1 -16 8034.61 278.170   9
   1   1  16 7784.31 267.647  17
  -1  -1  17 129059. 2832.02  23
   1   1  17 127608. 2823.09  17
   1   1  17 123838. 2765.09  16
  -1  -1  17 129466. 2842.09  10
   1  -1 -17 124496. 2826.64   9
  -1  -1  18 11486.9 381.914  10
   1   1  18 12029.8 370.741  17
   1  -1 -18 11629.1 367.821   9
  -1  -1  18 11650.1 374.633  23
   1   1  18 11367.5 322.279  16
  -1  -1  19 12226.5 398.441  10
   1   1  19 12135.5 383.769  17
   1  -1 -19 12076.8 368.276  24
   1  -1 -19 11083.6 368.511   9
  -1  -1  19 12174.8 391.819  23
   1   1  19 11835.2 332.166  16
   1   1  20 2260.40 114.236  16
  -1  -1  20 2341.72 156.273  23
  -1  -1  20 2169.47 153.011  10
   1  -1 -20 2368.65 136.277  24
   1  -1 -20 2231.38 134.030   9
   1  -1 -21 17703.8 504.479  24
   1   1  21 18059.8 477.831  16
   1   1  21 18295.8 551.420  23
  -1  -1  21 18761.6 547.323  23
  -1  -1  21 18141.1 547.728  10
   1   1  22 13939.9 396.578  16
  -1  -1  22 14503.7 470.863  10
   1   1  22 15029.7 473.030  23
  -1  -1  22 14964.4 469.773  23
  -1  -1  23 11796.5 406.261  10
  -1  -1  23 11424.9 397.091  23
   1   1  23 11652.4 405.409  23
   1   1  23 11104.8 419.725  10
   1   1  24 3025.27 189.811  23
  -1  -1  24 2848.32 180.842  10
  -1  -1  24 3039.48 187.626  23
   1   1  24 3053.93 204.921  10
  -1  -1  25 10189.2 367.037  10
   1   1  25 9904.86 387.288  10
   1   1  25 10461.5 373.191  23
  -1  -1  25 10423.2 369.014  23
  -1  -1  26 7880.14 309.533  23
  -1  -1  26 8046.36 308.643  10
   1   1  26 8428.00 337.798  10
   1   1  26 8040.86 315.457  23
  -1  -1  27 9875.73 340.313  10
  -1  -1  27 9812.74 344.686  23
   1   1  27 9743.01 349.303  23
   1   1  27 10103.9 367.569  10
  -1  -1  28 2138.70 140.788  23
   1   1  28 1894.24 138.537  23
   1   1  28 2096.11 153.306  10
  -1  -1  29 14847.1 439.628  23
   1   1  29 15344.3 460.289  10
   1   1  29 15729.1 448.647  23
   1   1  30 1580.58 114.082  10
   1   1  30 1626.73 111.110  23
  -1  -1  30 1618.13 106.320  23
   1   1  31 1176.01 85.5491  23
   1   1  31 1250.32 93.0910  10
  -1  -1  31 1317.83 84.2994  23
   1   1  32 6570.10 209.106  10
   1   1  32 6993.52 206.296  23
   1   2 -32 6275.08 186.448  21
   1  -2  32 5802.08 184.413  23
   1  -2  31 2015.53 107.923  23
  -1   2  31 2028.83 103.428  23
   1   2 -31 2191.01 105.568  13
  -1   2  30 4192.49 170.827  23
   1  -2  30 4006.35 183.511  10
   1  -2  30 4028.89 172.524  23
   1  -2  29 6097.45 249.682  10
  -1   2  29 6169.87 231.905  23
   1  -2  29 6025.24 235.279  23
  -1   2  28 1183.17 97.9291  10
  -1   2  28 1214.38 111.217  23
   1  -2  28 1191.09 123.232  10
   1  -2  28 1151.61 113.711  23
  -1   2  27 308.056 87.7678  23
  -1   2  27 382.010 74.6247  10
   1  -2  27 456.050 95.5400  23
  -1   2  26 1685.40 128.214  10
   1  -2  26 1529.80 142.344  23
  -1   2  26 1569.10 137.123  23
   1  -2  25 25597.5 738.272  23
  -1   2  25 26551.9 736.353  23
  -1   2  25 27874.6 734.216  10
  -1   2  24 15301.0 496.320  23
  -1   2  24 16076.8 493.870  10
   1  -2  24 15571.5 501.668  23
  -1   2  23 2226.82 164.686  23
   1  -2  23 2321.75 167.720  23
  -1   2  23 2226.25 152.178  10
   1  -2  22 14853.2 486.803  23
  -1   2  22 15566.6 483.267  10
   1  -2  21 2455.96 169.388  23
  -1   2  21 2470.59 160.431  10
   1  -2  20 22272.1 637.690  23
  -1   2  20 22722.7 634.874  10
  -1   2  19 15337.4 467.681  17
  -1   2  19 15134.3 466.350  10
   1  -2  19 15430.2 421.572  16
   1  -2  19 15314.4 474.077  23
   1  -2  18 8020.00 298.500  23
  -1   2  18 7983.52 293.866  10
  -1   2  18 8342.00 297.903  17
   1  -2  18 8605.27 322.709  10
   1  -2  18 7957.83 253.774  16
   1  -2  17 19957.4 563.536  23
   1  -2  17 20395.1 515.906  16
   1  -2  17 20197.4 586.023  10
  -1   2  17 20779.7 565.310  10
  -1   2  17 19881.8 558.750  17
  -1   2  16 62228.2 1454.74  17
  -1   2  16 61393.9 1581.72   3
  -1   2  16 60713.8 1457.17  10
   1  -2  16 64030.0 1462.93  23
   1  -2  16 62822.6 1406.72  16
   1  -2  16 61983.8 1479.74  10
   1  -2  15 3185.15 164.142  10
  -1  -2 -15 2974.91 153.102   5
   1  -2  15 3064.42 152.296  23
  -1   2  15 2787.00 145.651  10
   1  -2  15 2959.85 122.176  16
  -1   2  15 2963.45 148.431  17
  -1   2  15 3058.69 197.956   3
  -1   2  14 31119.7 868.347   1
  -1   2  14 30062.4 840.207   3
   1  -2  14 29951.0 709.347  16
  -1   2  14 30364.5 750.113  10
   1  -2  14 30921.9 799.519   7
  -1  -2 -14 30268.7 770.423   5
   1   2 -14 29652.3 744.239   9
  -1   2  14 31169.7 750.714  17
   1  -2  14 29450.8 876.181   3
  -1  -2 -14 29885.8 845.757   2
   1  -2  14 30436.1 771.589  10
   1  -2  14 29260.1 807.057   1
   1  -2  14 29930.6 751.754  23
   1  -2  13 9126.64 249.829  16
  -1  -2 -13 9084.32 354.833   2
   1   2 -13 8768.02 276.554   9
  -1   2  13 8790.48 337.582   3
   1  -2  13 8964.51 319.334   1
  -1   2  13 9080.22 358.536   1
   1  -2  13 9014.47 370.302   3
  -1   2  13 8920.09 278.881  10
   1  -2  13 9489.21 317.820   7
   1  -2  13 8871.97 297.506  10
  -1   2  13 8807.30 247.035   6
  -1  -2 -13 9232.09 299.444   5
  -1   2  13 9221.06 280.252  17
   1  -2  13 9073.50 283.796  23
   1  -2  12 92404.3 2085.48  23
  -1   2  12 97638.2 2084.82  17
  -1   2  12 94572.9 2159.75   3
   1  -2  12 97250.3 2130.68   7
  -1  -2 -12 90884.2 2187.04   2
   1  -2  12 93279.8 2101.82  10
  -1  -2 -12 96071.3 2111.02   5
   1  -2  12 91173.8 2127.82   1
  -1   2  12 91182.2 2048.94   6
   1  -2  12 92345.1 2047.78  16
   1  -2  12 94264.1 2207.39   3
   1  -2  11 19138.3 535.738   1
   1  -2  11 19776.4 476.664  16
   1  -2  11 19895.0 522.181  10
   1  -2  11 21145.4 546.742   7
  -1   2  11 20830.5 564.830   3
  -1  -2 -11 20029.7 594.252   2
  -1  -2 -11 21734.5 536.561   5
   1  -2  11 20823.0 601.827   3
  -1   2  11 18829.1 478.729   6
  -1  -2 -10 200851. 4273.51   5
   1  -2  10 201944. 4285.56   7
   1  -2  10 197085. 4343.46   3
  -1  -2 -10 202469. 4364.66   2
  -1  -2 -10 205663. 4303.00   1
  -1   2  10 199090. 4299.19   3
  -1   2   9 50080.6 1235.24   1
   1  -2   9 51281.4 1202.56   7
  -1   2   9 52427.4 1209.40   3
  -1  -2  -9 52588.8 1197.11   5
  -1  -2  -9 53865.6 1223.59   1
  -1  -2  -9 53070.8 1275.60   2
   1  -2   9 48073.0 1185.61   1
   1  -2   9 54368.6 1257.60   3
   1  -2   8 21646.5 546.819   1
  -1   2   8 23619.9 599.212   1
  -1   2   8 21632.0 517.065   5
   1  -2   8 23260.4 570.875   7
  -1  -2  -8 24563.9 592.205   1
  -1   2   8 23555.3 568.429   3
  -1  -2  -8 23441.5 566.054   5
  -1  -2  -7 35547.5 822.914   1
  -1  -2  -7 34123.2 790.909   5
  -1   2   7 31988.2 784.364   3
  -1   2   7 31731.7 746.251   5
   1  -2   7 33313.1 769.277   1
  -1   2   7 35234.4 821.246   1
   1  -2   7 35741.3 801.259   7
   1  -2   6 129571. 2859.84   7
   1  -2   6 126573. 2897.59   2
  -1   2   6 128489. 2840.44   3
  -1   2   6 129149. 2874.79   1
   1   2  -6 131527. 2788.28   5
  -1  -2  -6 129726. 2854.22   5
  -1  -2  -6 131094. 2888.98   1
  -1   2   5 49628.0 1133.98   1
  -1  -2  -5 52086.8 1161.71   1
  -1   2   5 49182.6 1097.89   3
   1   2  -5 49600.1 1065.53   5
  -1   2   4 229530. 4860.47   1
  -1   2   4 224492. 4819.70   3
  -1  -2  -4 224959. 4895.88   1
   1  -2   4 217793. 4871.70   2
   1   2  -4 225629. 4805.58   5
  -1   2   3 478113. 9767.86   3
  -1   2   3 458767. 9811.15   1
   1   2  -3 458636. 9773.54   5
   1   2  -2 16634.8 384.430   5
   1  -2   2 17441.5 401.284   3
  -1   2   2 16697.5 404.205   1
  -1  -2  -2 16134.2 402.453   5
   1  -2   1 277676. 5969.87   3
  -1  -2  -1 282810. 6018.75   4
  -1   2   1 281738. 5977.38   1
  -1  -2  -1 275973. 5980.18   5
  -1  -2   0 68164.3 1479.67   5
  -1   2   0 67870.7 1455.42   2
  -1  -2   0 67270.6 1458.90   7
   1  -2   0 68041.7 1461.54   3
  -1   2   0 70014.7 1471.81   1
  -1  -2   1 284903. 6119.53   7
   1   2   1 285705. 6130.86   7
   1   2   1 271189. 6190.16   4
  -1   2  -1 282428. 6130.60   2
  -1   2  -1 296423. 6122.60   1
  -1   2  -2 15445.8 377.965   2
   1   2   2 15367.7 421.969   4
  -1   2  -3 466116. 9869.82   2
   1   2   3 464571. 9908.37   4
   1   2   3 471165. 9856.47   7
  -1   2  -3 440412. 9873.14   7
  -1   2  -4 221542. 4857.02   7
   1   2   4 220764. 4844.26   7
   1  -2  -4 229078. 4826.16   2
  -1   2  -4 228515. 4863.80   2
   1  -2  -5 49138.4 1083.29   2
  -1  -2   5 48554.5 1123.33   2
   1   2   5 49578.3 1097.46   7
  -1   2  -5 48845.1 1106.20   7
  -1   2  -5 49658.0 1120.37   2
  -1   2  -6 128644. 2743.95   7
  -1   2  -6 126767. 2766.11   2
  -1  -2   6 129642. 2768.93   2
   1   2   6 127209. 2738.80   7
   1  -2  -6 127990. 2729.49   2
  -1   2  -6 126368. 2766.26   6
  -1   2  -7 32533.2 804.154   6
   1  -2  -7 33544.6 777.767   2
  -1   2  -7 34254.9 786.044   7
  -1  -2   7 34247.2 812.714   2
  -1   2  -7 34048.6 812.977   2
   1   2   7 33776.9 784.959   7
   1   2   7 33894.0 810.368   6
   1   2   8 23275.6 587.923   6
   1   2   8 23223.5 562.768   7
  -1   2  -8 22000.9 579.751   6
  -1  -2   8 23245.0 591.667   2
   1  -2  -8 22534.7 556.160   2
  -1   2  -8 23471.5 594.336   2
   1   2   9 52031.7 1198.97   7
  -1  -2   9 50398.9 1231.50   2
   1  -2  -9 54423.9 1200.34   2
  -1   2  -9 53818.7 1236.57   2
  -1   2  -9 53581.6 1220.37   6
   1   2   9 55047.7 1226.93   6
   1  -2 -10 197260. 4350.08   2
  -1   2 -10 198594. 4367.76   6
   1   2  10 199071. 4373.70   6
   1   2  10 202282. 4349.78   7
   1   2  10 192340. 4468.15   3
  -1  -2  10 202651. 4396.94   2
  -1   2 -10 203901. 4395.55   2
   1   2  11 19949.3 532.576  10
   1   2  11 20795.2 541.378   7
  -1   2 -11 20231.7 550.901   6
   1  -2 -11 21738.4 546.746   2
   1   2  11 20667.9 497.229  13
  -1   2 -11 20722.4 576.155   2
   1   2  11 20623.4 557.209   6
  -1  -2  11 20878.1 588.531   2
   1   2  11 19816.9 639.812   3
   1   2  11 20374.6 485.896  22
   1   2  12 98484.6 2275.73   3
  -1  -2  12 86498.6 2096.04  10
   1   2  12 92731.4 2092.36  17
   1  -2 -12 93579.8 2115.41  12
   1   2  12 95849.3 2128.60   7
  -1  -2  12 93378.2 2190.64   2
   1   2  12 92903.1 2116.25  10
  -1  -2  12 93928.7 2096.22  23
   1   2  12 94275.5 2144.77   6
   1  -2 -12 96908.4 2136.29   2
  -1   2 -12 96769.9 2177.24   2
  -1   2 -12 94300.7 2135.64   6
   1   2  12 96506.7 2059.70  22
   1   2  12 95819.7 2074.34  13
  -1  -2  13 8818.75 286.521  10
   1   2  13 9022.65 313.040   6
  -1  -2  13 9615.67 361.990   2
   1   2  13 8561.98 241.484  16
   1  -2 -13 8962.80 290.179  12
  -1  -2  13 9315.03 279.096   7
   1   2  13 8765.64 245.120  22
   1   2  13 9417.34 403.995   3
   1  -2 -13 9060.42 308.218   2
   1   2  13 9094.62 276.580  17
   1   2  13 9107.37 304.494   7
  -1  -2  13 9224.62 280.397  23
  -1   2 -13 9341.47 337.805   2
  -1  -2  14 29169.3 741.416  10
  -1  -2  14 29482.3 733.213   7
   1   2  14 28977.3 687.978  16
  -1   2 -14 30828.0 821.043   2
   1  -2 -14 31158.0 784.766   2
  -1  -2  14 28283.2 842.835   2
   1   2  14 29751.5 770.955   7
   1  -2 -14 30527.3 751.161  12
   1   2  14 31193.2 918.974   3
   1   2  14 29573.9 730.551  17
   1   2  14 28292.3 692.735  22
  -1  -2  14 30646.4 737.809  23
   1   2  15 2993.07 115.724  16
  -1  -2  15 2809.20 145.410  23
  -1  -2  15 3047.01 146.009   7
   1   2  15 2969.14 145.181  17
   1  -2 -15 3167.25 156.657  12
   1  -2 -15 3001.19 169.514   2
   1   2  15 2885.34 119.765  22
  -1  -2  15 2982.47 153.546  10
   1  -2 -16 60930.8 1438.47   9
  -1  -2  16 63062.6 1430.21  23
   1   2  16 61388.1 1421.69  17
   1  -2 -16 61067.4 1487.86   2
  -1  -2  16 59075.9 1427.88   7
  -1  -2  16 64773.3 1444.52  10
   1   2  16 59741.4 1375.83  22
   1   2  16 60088.6 1366.85  16
   1   2  17 20165.5 496.737  16
   1   2  17 19727.3 547.751  17
   1  -2 -17 20157.9 560.362   9
  -1  -2  17 19712.4 564.331  10
  -1  -2  17 20124.8 554.518  23
   1   2  18 8049.02 241.488  16
  -1  -2  18 8120.18 302.408  10
   1   2  18 8306.30 292.186  17
  -1  -2  18 8325.71 298.092  23
   1  -2 -18 7902.89 291.491   9
   1  -2 -19 14510.8 453.453   9
   1   2  19 15334.2 460.429  17
  -1  -2  19 15382.4 476.405  10
  -1  -2  19 15329.3 465.587  23
   1   2  19 15423.7 401.073  16
   1   2  20 22666.0 557.300  16
  -1  -2  20 22033.9 636.294  10
  -1  -2  20 22739.2 630.720  23
   1   2  20 21746.4 618.517  17
   1  -2 -20 21450.0 608.828   9
   1  -2 -21 2408.76 143.965   9
   1   2  21 2517.70 121.502  16
   1  -2 -21 2584.60 148.230  24
   1   2  21 2193.82 175.147  10
  -1  -2  21 2553.63 168.218  10
  -1  -2  21 2585.25 169.502  23
   1  -2 -22 14731.2 440.172  24
   1   2  22 14685.1 400.154  16
  -1  -2  22 15173.1 476.491  23
  -1  -2  22 14577.7 476.712  10
   1   2  22 14507.5 495.790  10
  -1  -2  23 2370.12 164.325  10
   1   2  23 2340.23 170.444  23
   1  -2 -23 2320.15 136.580  24
   1   2  23 2299.06 179.592  10
  -1  -2  23 2121.38 161.701  23
  -1  -2  24 14311.9 484.224  10
  -1  -2  24 15746.6 489.808  23
   1   2  24 15822.3 519.392  10
   1   2  24 15143.2 490.765  23
  -1  -2  25 27751.8 746.657  10
  -1  -2  25 25932.5 734.728  23
   1   2  25 26736.7 770.205  10
   1   2  25 26805.7 744.362  23
  -1  -2  26 1349.14 129.757  23
   1   2  26 1671.88 155.227  10
   1   2  26 1659.07 140.383  23
  -1  -2  26 1769.12 137.584  10
   1   2  27 414.178 94.7928  23
  -1  -2  27 520.390 96.1288  23
   1   2  27 526.990 104.463  10
   1   2  28 1210.64 118.628  23
  -1  -2  28 1051.94 106.019  23
   1   2  28 1213.93 120.014  10
   1   2  29 5948.86 232.467  23
   1   2  29 6097.96 247.012  10
  -1  -2  29 6053.08 228.572  23
   1   2  30 4054.46 180.960  10
  -1  -2  30 3931.39 165.658  23
   1   2  30 3908.10 169.416  23
   1   2  31 2132.50 108.849  23
  -1  -2  31 2223.94 106.549  23
   1   2  31 1958.17 110.995  10
   1   2  32 6215.96 183.824  23
   1   2  32 5513.68 182.799  10
   1   3 -31 1196.65 70.5226  13
   1  -3  31 1005.51 76.2928  23
  -1   3  31 1218.59 76.4757  23
   1  -3  30 996.947 89.1399  23
  -1   3  30 1079.92 86.0353  23
   1   3 -30 1028.28 81.2942  13
  -1   3  29 7522.44 262.828  23
   1  -3  29 7614.92 268.270  23
   1  -3  28 5939.73 243.718  23
  -1   3  28 6019.01 240.851  23
  -1   3  28 6313.37 224.783  10
  -1   3  27 5488.43 223.480  10
  -1   3  27 5811.53 244.511  23
   1  -3  27 5451.62 242.409  23
  -1   3  26 16482.8 503.579  23
  -1   3  26 16338.7 487.030  10
   1  -3  26 16396.2 504.170  23
   1  -3  25 395.312 103.229  23
  -1   3  25 317.527 74.5793  10
  -1   3  25 465.682 99.2492  23
  -1   3  24 13450.8 433.900  10
   1  -3  24 13100.0 445.921  23
   1  -3  23 20095.4 596.537  23
  -1   3  23 19290.3 574.602  10
  -1   3  22 13531.9 438.253  10
   1  -3  22 13195.6 444.796  23
  -1   3  21 4386.12 215.884  10
   1  -3  21 4342.07 226.081  23
  -1   3  20 6605.92 271.771  17
  -1   3  20 6356.75 266.420  10
   1  -3  20 5978.03 280.234  10
   1  -3  20 6194.74 271.556  23
   1  -3  19 15302.1 493.853  10
  -1   3  19 15119.1 467.797  17
   1  -3  19 15226.4 474.252  23
  -1   3  19 15516.1 470.211  10
   1  -3  18 2115.09 147.081  23
  -1   3  18 2198.12 142.152  10
   1  -3  18 1945.99 113.772  16
  -1   3  18 2214.17 143.088  17
   1  -3  18 2015.24 156.542  10
   1  -3  17 31711.4 824.689  10
   1  -3  17 30483.4 750.256  16
  -1   3  17 31493.3 799.157  10
   1  -3  17 30612.9 801.556  23
  -1   3  17 31060.1 796.781  17
  -1   3  16 565.398 80.0239  17
  -1   3  16 445.425 73.9040  10
   1  -3  16 594.563 89.3427  10
   1  -3  16 490.366 60.4684  16
   1  -3  16 381.019 77.4250  23
  -1   3  15 35058.6 861.278  10
  -1   3  15 33660.0 967.124   3
  -1   3  15 34949.8 860.582  17
   1  -3  15 35435.4 884.774  10
   1  -3  15 34164.2 863.616  23
   1  -3  15 35082.3 820.134  16
   1  -3  14 503.359 73.3896   7
   1  -3  14 525.826 55.7296  16
  -1   3  14 716.431 74.6615  17
   1  -3  14 552.683 99.3567   3
  -1  -3 -14 597.270 92.0492   2
  -1   3  14 610.841 91.1745   3
  -1   3  14 635.827 68.8501  10
   1  -3  14 621.518 77.8312  23
   1  -3  14 524.973 78.2428  10
   1  -3  13 4456.80 244.387   3
   1  -3  13 4605.75 196.639   1
  -1   3  13 4566.29 177.055  10
  -1  -3 -13 4459.47 189.084   5
   1  -3  13 4141.77 186.336  10
   1  -3  13 4460.88 181.098  23
  -1  -3 -13 4122.40 230.740   2
  -1   3  13 4721.65 230.581   3
   1  -3  13 4633.54 206.971   7
  -1   3  13 4549.79 162.005   6
  -1   3  13 4619.19 178.895  17
  -1   3  12 76120.8 1661.97  17
  -1  -3 -12 71233.1 1776.67   2
   1  -3  12 76353.3 1711.04   7
   1  -3  12 73438.8 1782.38   3
   1  -3  12 72582.5 1683.60   1
  -1   3  12 71052.8 1640.08   6
   1  -3  12 74275.6 1665.89  23
  -1   3  12 73971.2 1742.83   3
   1  -3  12 71960.4 1682.58  10
  -1  -3 -12 74285.9 1686.87   5
  -1   3  11 9771.17 286.661  17
   1  -3  11 9315.71 294.568   1
  -1  -3 -11 9908.18 338.177   1
  -1  -3 -11 10227.3 309.556   5
   1  -3  11 9858.85 292.885  23
  -1   3  11 9642.67 334.388   3
  -1   3  11 10141.5 369.405   1
   1  -3  11 9835.58 320.122   7
  -1  -3 -11 9283.77 366.332   2
   1  -3  11 10216.2 303.459  10
   1  -3  10 95317.1 2067.08   7
   1  -3  10 91030.3 1991.92  16
  -1   3  10 97667.7 2131.97   1
  -1   3  10 92156.2 2078.31   3
  -1  -3 -10 95946.7 2096.27   1
  -1  -3 -10 97318.0 2055.30   5
   1  -3  10 91775.0 2147.46   2
  -1  -3 -10 93959.9 2151.12   2
   1  -3   9 42497.7 974.185   7
   1  -3   9 36914.9 925.516   1
   1  -3   9 40151.7 1035.48   2
   1   3  -9 40585.3 885.574   6
  -1   3   9 41427.2 979.783   3
  -1  -3  -9 42279.4 962.439   5
  -1  -3  -9 43535.1 1008.58   1
  -1   3   9 42750.9 1021.11   1
  -1   3   9 39540.0 919.661   5
  -1  -3  -9 38898.6 1037.11   2
   1   3  -8 70123.1 1501.39   6
   1  -3   8 69285.3 1633.66   2
  -1  -3  -8 70111.0 1623.79   3
  -1   3   8 65058.5 1567.63   3
  -1  -3  -8 72773.3 1616.14   1
  -1   3   8 69490.7 1529.83   5
  -1  -3  -8 71057.1 1567.59   5
   1  -3   8 66328.3 1526.78   1
  -1   3   8 71185.7 1620.60   1
  -1   3   7 6806.05 217.328   3
   1  -3   7 6932.20 255.679   2
   1  -3   7 6907.27 180.595   1
  -1  -3  -7 6337.10 249.493   3
  -1  -3  -7 6912.40 250.800   1
  -1  -3  -7 7084.16 219.260   5
  -1   3   7 6997.30 247.550   1
  -1   3   7 6312.68 187.014   5
  -1  -3  -6 10801.9 337.847   3
   1  -3   6 10578.2 323.453   2
  -1  -3  -6 10968.6 337.341   1
  -1   3   6 10749.6 282.349   3
  -1  -3  -6 9804.49 286.064   5
  -1   3   6 10471.5 315.685   1
   1  -3   6 9831.94 235.951   4
  -1   3   5 117742. 2530.60   1
  -1   3   5 113060. 2480.47   3
  -1  -3  -5 115932. 2563.43   1
  -1  -3  -5 111196. 2560.76   3
   1  -3   5 113498. 2531.85   2
  -1  -3  -4 18172.4 517.881   1
   1  -3   4 17767.5 481.451   2
  -1   3   4 19694.0 485.416   1
   1   3  -4 19807.6 433.139   5
  -1  -3  -4 16170.6 505.575   3
  -1   3   3 44453.1 1001.65   1
   1   3  -3 44298.0 963.089   5
   1  -3   3 42871.3 993.151   2
  -1  -3  -3 42234.4 983.408   5
   1   3  -2 85149.2 1809.83   5
   1  -3   2 82449.5 1822.83   2
  -1   3   2 80841.6 1831.60   1
  -1   3   1 147776. 3137.96   1
   1   3  -1 152714. 3129.91   5
   1  -3   0 102169. 2155.24   2
   1   3   0 98660.8 2181.65   5
  -1   3   0 97800.0 2175.88   1
   1   3   1 146156. 3197.35   5
   1   3   1 148265. 3163.69   7
  -1  -3   2 77605.1 1848.66   4
   1   3   2 75089.6 1840.50   4
  -1   3  -2 81772.7 1781.72   2
   1   3   2 83726.7 1770.95   7
   1   3   2 84758.2 1805.72   5
   1   3   3 42494.0 1009.10   4
  -1   3  -3 40909.6 963.623   7
   1   3   3 43248.8 937.725   7
  -1   3  -3 43152.0 953.980   2
  -1  -3   3 40437.0 1012.21   4
   1   3   4 18645.1 504.242   4
  -1   3  -4 18207.9 461.330   7
  -1  -3   4 18790.5 517.985   4
  -1  -3   4 18699.4 412.889   7
   1   3   4 19370.5 441.441   7
   1  -3  -4 18702.8 419.904   2
  -1   3  -4 18652.5 458.099   2
  -1  -3   5 113167. 2574.42   4
   1  -3  -5 113112. 2468.58   2
  -1   3  -5 118342. 2511.35   2
   1   3   5 113540. 2485.95   7
  -1  -3   5 115442. 2457.63   7
  -1   3  -5 113414. 2501.88   7
  -1  -3   5 112943. 2526.85   2
  -1  -3   6 10867.2 257.040   7
  -1   3  -6 10427.5 290.093   7
   1  -3  -6 10792.4 271.116   2
  -1  -3   6 10221.9 311.928   2
   1   3   6 11099.7 283.868   7
  -1   3  -6 10030.2 299.422   2
   1   3   7 6992.03 282.519   3
   1  -3  -7 6897.83 197.870   2
  -1   3  -7 6390.50 205.299   7
   1   3   7 6794.29 204.831   7
  -1  -3   7 6933.53 234.457   2
  -1  -3   7 6834.02 181.248   7
  -1   3  -7 6835.49 226.923   2
   1   3   7 7074.48 232.378   6
  -1   3  -8 70548.5 1559.64   2
  -1  -3   8 69027.9 1492.25   7
  -1   3  -8 68717.3 1552.82   6
   1   3   8 70593.6 1559.25   6
   1   3   8 69857.3 1522.80   7
   1  -3  -8 63230.3 1509.50   2
  -1  -3   8 70291.7 1567.65   2
   1   3   8 65750.8 1636.90   3
  -1   3  -8 64577.7 1518.75   7
  -1  -3   9 40817.2 940.687   7
   1   3   9 43312.0 1008.23   6
  -1   3  -9 41495.2 1007.59   2
  -1   3  -9 41934.5 998.099   6
   1  -3  -9 42577.8 968.772   2
  -1  -3   9 41350.9 1015.80   2
   1   3   9 40288.7 1086.23   3
   1   3   9 41360.1 971.259   7
   1   3  10 93379.0 2094.28   7
   1   3  10 90217.7 2095.65  10
  -1  -3  10 91518.0 2142.09   2
  -1   3 -10 95080.6 2121.52   6
   1   3  10 93231.9 2055.32  13
  -1  -3  10 94725.4 2062.69   7
  -1   3 -10 94605.4 2138.07   2
   1   3  10 98353.3 2242.74   3
   1   3  10 93855.8 2125.57   6
   1  -3 -10 95375.7 2093.65   2
  -1  -3  11 9809.24 283.124  23
   1   3  11 9876.36 301.198   7
   1   3  11 9852.65 322.935   6
   1   3  11 9554.88 393.380   3
   1   3  11 9333.41 279.728  17
  -1   3 -11 9590.74 314.626   6
   1   3  11 8878.78 295.090  10
   1  -3 -11 10327.7 303.206   2
  -1  -3  11 9589.03 271.548   7
   1   3  11 9591.53 253.205  22
   1   3  11 9770.51 265.547  13
   1  -3 -11 9259.01 296.389  12
  -1  -3  11 9675.74 340.895   2
  -1   3 -11 9960.41 334.286   2
  -1   3 -12 75320.5 1759.32   2
   1   3  12 73430.1 1679.31  17
  -1  -3  12 74374.7 1779.80   2
   1  -3 -12 76055.5 1711.59   2
  -1  -3  12 73277.2 1670.32   7
   1   3  12 73952.9 1708.83   7
  -1  -3  12 76385.0 1683.61  23
   1   3  12 74049.1 1658.13  13
   1  -3 -12 72740.6 1699.52  12
   1   3  12 73440.1 1859.26   3
   1   3  12 75534.7 1642.89  22
   1   3  12 76165.4 1739.90   6
  -1  -3  12 74794.7 1695.13  10
  -1   3 -12 74232.0 1725.05   6
   1   3  13 4710.88 179.988  17
   1   3  13 4574.15 152.139  22
   1   3  13 4741.39 198.464   7
  -1  -3  13 4602.90 237.729   2
  -1  -3  13 4637.09 174.545   7
   1   3  13 4955.55 286.171   3
  -1   3 -13 4712.71 205.132   6
  -1   3 -13 4791.15 227.136   2
   1   3  13 4539.72 209.214   6
  -1  -3  13 4938.66 191.671  10
   1  -3 -13 4417.21 191.009  12
   1   3  13 4772.10 165.642  13
   1  -3 -13 4883.42 201.693   2
  -1  -3  13 4831.31 184.352  23
  -1  -3  14 463.630 82.5071   2
   1   3  14 550.130 52.3180  22
  -1   3 -14 681.269 76.5017   6
   1  -3 -14 644.462 74.1835   2
  -1  -3  14 463.539 56.2945   7
   1   3  14 521.203 68.1101   7
  -1   3 -14 598.744 86.9980   2
   1   3  14 516.517 47.3094  16
   1   3  14 568.680 68.1413  17
   1   3  14 614.100 117.451   3
  -1  -3  14 556.385 72.4767  10
  -1  -3  14 575.425 71.4837  23
   1   3  14 522.047 74.6270   6
   1  -3 -14 623.286 74.7563  12
   1   3  15 33842.1 782.902  16
  -1  -3  15 33843.7 852.402  10
  -1  -3  15 32767.2 833.719   7
  -1  -3  15 34163.0 839.618  23
   1   3  15 32648.8 884.891   6
   1   3  15 34546.1 791.882  22
   1  -3 -15 34701.4 854.169  12
   1  -3 -15 33854.3 879.135   2
   1   3  15 33049.3 832.573  17
   1   3  16 444.305 71.8505  17
   1   3  16 503.443 59.4070  22
  -1  -3  16 529.001 82.2755  10
   1   3  16 441.177 49.0175  16
  -1  -3  16 489.108 77.8645  23
   1  -3 -16 511.578 75.8588  12
   1  -3 -17 33064.3 818.406  12
   1   3  17 31063.1 802.246  17
   1   3  17 31332.7 738.990  16
  -1  -3  17 31305.3 818.831  10
  -1  -3  17 30930.3 803.970  23
  -1  -3  18 1974.26 142.302  10
  -1  -3  18 2225.08 144.209  23
   1  -3 -18 2107.17 138.625   9
   1   3  18 2122.32 100.225  16
   1   3  18 2019.15 137.626  17
   1  -3 -19 14956.8 464.419   9
   1   3  19 13786.1 478.059  10
   1   3  19 15404.4 395.017  16
  -1  -3  19 15400.1 478.694  10
   1   3  19 14767.4 458.411  17
  -1  -3  19 15639.3 469.471  23
   1   3  20 6546.18 209.594  16
   1   3  20 6493.86 268.452  17
  -1  -3  20 6574.55 273.180  23
   1   3  20 6291.10 286.614  10
   1  -3 -20 6363.69 261.422   9
  -1  -3  20 6704.99 279.582  10
  -1  -3  21 4098.43 212.673  23
   1   3  21 4106.30 208.643  17
  -1  -3  21 4582.46 225.234  10
   1  -3 -21 4310.90 201.185   9
   1   3  21 4104.56 155.978  16
   1   3  21 3935.24 229.847  10
   1  -3 -22 13000.5 409.057  24
   1   3  22 12891.1 353.753  16
   1  -3 -22 12053.3 399.045   9
   1   3  22 13070.3 460.291  10
  -1  -3  22 13752.4 445.784  10
  -1  -3  22 12636.8 429.871  23
   1   3  22 12969.9 427.565  17
   1   3  23 19414.4 610.392  10
  -1  -3  23 19446.7 591.702  10
  -1  -3  23 19728.9 580.869  23
   1  -3 -23 19263.6 549.481  24
  -1  -3  24 12856.6 438.096  23
   1  -3 -24 13192.3 403.512  24
  -1  -3  24 13497.0 449.192  10
   1   3  24 13584.9 447.767  23
   1   3  24 13495.7 468.033  10
   1   3  25 421.384 104.896  23
  -1  -3  25 403.063 96.7711  23
  -1  -3  25 333.392 84.8611  10
   1   3  25 457.390 107.857  10
  -1  -3  26 16069.1 492.251  23
   1   3  26 16640.8 519.319  10
   1   3  26 15693.7 496.688  23
   1   3  27 5415.03 250.521  10
  -1  -3  27 5436.39 233.942  23
   1   3  27 5266.98 236.146  23
   1   3  28 5875.40 254.195  10
  -1  -3  28 5885.20 239.578  23
   1   3  29 7512.47 267.504  23
   1   3  29 7802.43 280.938  10
  -1  -3  29 7553.98 262.797  23
   1   3  30 1021.32 88.1843  23
  -1  -3  30 1084.73 83.2243  23
   1   3  30 949.484 90.2228  10
  -1  -3  31 1173.95 75.4769  23
   1   3  31 1179.28 82.6705  10
   1   3  31 1190.16 80.2733  23
  -1   4  31 12571.5 330.331  23
   1  -4  31 12245.0 336.395  23
  -1   4  30 1436.54 93.7381  23
   1  -4  30 1463.18 98.1701  23
   1  -4  30 1365.63 75.2743  20
   1   4 -30 1558.78 86.8810  13
   1  -4  29 2249.73 131.865  23
  -1   4  29 2100.70 123.820  23
   1   4 -29 2055.37 115.992  13
  -1   4  28 285.227 73.9844  23
   1   4 -28 184.851 63.8734  13
   1  -4  28 255.585 75.9459  23
  -1   4  27 570.792 75.1148  10
  -1   4  27 648.868 94.7690  23
   1  -4  27 532.474 93.4109  23
   1  -4  26 1906.25 150.256  23
  -1   4  26 1968.87 131.194  10
  -1   4  26 1962.34 146.105  23
  -1   4  25 22071.9 612.893  10
   1  -4  25 21721.7 630.143  23
  -1   4  24 13570.3 430.645  10
   1  -4  24 13120.5 445.867  23
   1  -4  23 45330.5 1172.86  23
  -1   4  23 47488.9 1164.38  10
  -1   4  22 25200.9 699.546  10
   1  -4  22 25082.9 713.589  23
  -1   4  21 3424.07 189.715  10
   1  -4  21 3589.21 221.200  10
   1  -4  21 3666.58 207.039  23
  -1   4  21 3571.29 200.382  17
  -1   4  20 1367.65 119.694  10
   1  -4  20 1192.08 128.582  23
  -1   4  20 1180.20 121.345  17
   1  -4  20 1184.88 136.813  10
   1  -4  19 27267.7 756.428  23
  -1   4  19 28058.9 752.219  17
  -1   4  19 28166.5 751.051  10
   1  -4  19 28466.9 781.726  10
   1  -4  18 5067.51 233.037  23
   1  -4  18 5290.38 246.147  10
  -1   4  18 5272.73 228.697  17
  -1   4  18 4881.68 220.374  10
  -1   4  17 7111.40 273.188  17
   1  -4  17 7254.32 281.548  23
  -1   4  17 7462.62 275.287  10
   1  -4  17 7572.82 296.579  10
   1  -4  16 34982.5 866.829  16
   1  -4  16 37198.2 922.164  23
  -1   4  16 36674.8 912.668  10
   1  -4  16 36298.4 938.886  10
  -1   4  16 38519.8 918.635  17
  -1   4  15 355.589 69.0800  17
  -1   4  15 548.321 73.7084  10
   1  -4  15 456.440 83.5044  10
   1  -4  15 495.449 78.6972  23
  -1   4  14 19189.0 523.705  10
   1  -4  14 19177.0 531.129  23
   1  -4  14 19907.7 548.643  10
  -1   4  14 19867.9 527.648  17
  -1   4  13 7060.89 242.770  17
  -1  -4 -13 6889.25 322.673   2
   1  -4  13 7277.00 263.275  10
  -1   4  13 7844.20 357.690   1
  -1   4  13 7016.59 241.658  10
  -1   4  13 6982.91 234.229   6
  -1   4  13 7006.64 300.631   3
   1  -4  13 7381.62 251.811  23
  -1   4  12 16089.8 432.029  17
   1  -4  12 15428.3 451.110  10
  -1  -4 -12 16307.3 501.901   1
  -1   4  12 16793.0 505.064   3
   1  -4  12 15357.4 402.336  16
   1  -4  12 15717.9 552.150   2
   1  -4  12 15989.2 437.946  23
  -1  -4 -12 15958.8 541.823   2
  -1   4  12 17326.0 565.720   1
   1  -4  12 15107.0 426.620   1
  -1   4  12 16291.3 433.120  10
   1  -4  11 18307.8 448.410  16
   1  -4  11 18369.0 494.176  10
  -1  -4 -11 18562.5 547.889   1
  -1   4  11 18043.7 584.282   1
   1  -4  11 18349.7 469.945   1
   1  -4  11 17993.3 587.564   2
  -1   4  11 18077.4 533.986   3
   1  -4  11 17917.2 481.412  23
   1   4 -11 18249.6 425.051   6
  -1  -4 -11 18376.4 589.452   2
  -1   4  11 18590.5 477.079  17
   1  -4  10 46831.9 1103.10   4
  -1  -4 -10 47529.5 1241.61   2
  -1   4  10 51873.0 1182.94   3
   1  -4  10 45783.9 1096.88   1
  -1   4  10 50357.1 1117.93  17
  -1   4  10 53586.9 1250.98   1
  -1   4  10 46898.8 1108.66   5
   1   4 -10 47900.8 1072.82   6
  -1  -4 -10 49537.0 1202.35   1
   1  -4  10 49327.2 1124.42  23
   1  -4  10 48402.0 1135.93  10
   1  -4  10 51265.7 1246.34   2
   1  -4  10 48860.2 1089.41  16
   1  -4   9 176582. 3709.33   2
  -1  -4  -9 170913. 3679.17   1
  -1  -4  -9 173936. 3694.75   3
  -1   4   9 172511. 3641.47   3
   1  -4   9 165832. 3564.53   4
  -1   4   9 181931. 3720.36   1
  -1   4   9 169471. 3586.58   5
  -1   4   8 15623.1 398.341   5
   1  -4   8 16139.7 370.482   4
  -1   4   8 16901.5 491.392   1
   1  -4   8 15922.1 475.829   2
  -1   4   8 16451.0 434.548   3
  -1  -4  -8 16658.7 485.267   3
  -1  -4  -8 16629.6 479.155   1
   1  -4   7 101730. 2155.86   2
  -1   4   7 99572.0 2168.47   1
  -1  -4  -7 98602.6 2174.17   3
  -1  -4  -7 103827. 2173.74   1
  -1   4   6 51800.7 1247.87   1
   1  -4   6 50541.6 1228.12   2
  -1  -4  -6 52326.7 1266.13   3
  -1  -4  -6 55535.9 1278.93   1
  -1  -4  -5 8067.19 303.076   1
   1  -4   5 8654.33 273.537   2
  -1  -4  -5 8617.15 308.643   3
  -1   4   4 99292.1 2146.67   1
  -1  -4  -4 93219.9 2178.75   3
   1  -4   4 93637.7 2111.46   2
   1   4  -3 70329.3 1568.29   5
  -1  -4  -3 71524.1 1670.83   3
   1  -4   3 71520.2 1589.48   2
  -1   4   3 73476.6 1623.18   1
   1  -4   2 33814.7 775.032   2
   1   4  -2 36067.9 776.581   5
   1   4  -1 32548.2 724.069   5
   1   4  -1 29967.8 786.932   4
   1  -4   1 30806.3 706.245   2
   1  -4   0 2057.51 68.5401   2
   1   4   0 2095.42 91.7790   5
  -1   4  -1 32251.8 720.936   4
  -1  -4   1 31662.2 795.971   4
   1   4   1 32782.4 701.478   7
   1  -4  -1 30687.5 711.041   3
   1   4   1 33243.3 751.574   5
   1  -4  -1 31957.2 702.064   2
   1  -4  -2 33130.9 750.312   3
   1   4   2 35139.2 759.865   7
  -1   4  -2 32942.0 758.234   4
  -1  -4   2 34096.2 852.777   4
   1   4   2 35697.8 805.703   5
   1  -4  -2 35755.1 747.252   2
   1  -4  -3 72721.1 1548.34   2
  -1   4  -3 68867.5 1596.26   7
   1   4   3 72398.8 1561.27   7
  -1  -4   3 70497.7 1655.22   4
   1   4   3 70287.2 1602.33   5
   1   4   4 92843.1 2008.12   7
   1  -4  -4 93498.8 1993.56   2
  -1  -4   4 94655.0 2109.63   4
  -1   4  -4 93505.5 2040.38   7
   1   4   4 92587.7 2049.72   5
   1  -4  -5 8410.53 217.192   2
  -1   4  -5 8733.94 249.322   7
  -1  -4   5 8725.30 305.863   4
  -1   4  -5 8434.67 252.220   2
   1   4   5 8400.82 228.895   7
   1  -4  -6 50501.2 1140.19   2
  -1  -4   6 50640.9 1249.34   4
   1   4   6 50587.4 1151.47   7
  -1   4  -6 54201.1 1189.49   2
  -1   4  -6 50615.5 1166.64   7
  -1  -4   6 51637.0 1119.67   7
  -1   4  -7 96145.5 2168.27   2
  -1  -4   7 97887.4 2099.76   7
   1   4   7 96696.4 2132.36   7
   1  -4  -7 96022.7 2121.36   2
  -1  -4   7 98928.0 2242.02   4
  -1   4  -7 95777.1 2140.67   7
   1  -4  -8 16102.7 409.383   2
  -1  -4   8 15861.6 387.072   7
  -1   4  -8 16131.2 419.895   7
  -1  -4   8 15735.3 459.849   2
  -1  -4   8 16264.9 506.061   4
  -1   4  -8 16415.2 452.390   2
   1   4   8 16168.2 417.590   7
  -1  -4   9 168925. 3817.23   2
   1  -4  -9 174658. 3753.24   2
   1  -4  -9 167743. 3745.64  15
   1   4   9 167866. 3766.91  10
   1   4   9 172638. 3800.84   6
  -1  -4   9 171633. 3724.73   7
   1   4   9 175957. 3760.46   7
  -1   4  -9 182919. 3811.84   2
   1   4  10 49718.4 1142.93   7
   1  -4 -10 49814.1 1138.34   2
   1  -4 -10 47924.7 1147.21  12
  -1  -4  10 48626.2 1107.26   7
   1   4  10 49208.4 1091.62  22
   1  -4 -10 46201.0 1124.00  15
   1   4  10 51548.0 1186.95   6
  -1   4 -10 52199.3 1196.08   2
  -1  -4  10 50451.9 1204.92   2
  -1   4 -10 49195.2 1173.41   6
  -1  -4  10 47056.7 1139.32  10
  -1  -4  11 17999.4 474.969  10
   1   4  11 17889.5 478.342   7
   1   4  11 17093.1 459.142  17
  -1  -4  11 17213.2 528.056   2
  -1  -4  11 17416.3 460.817  23
  -1  -4  11 17010.8 444.155   7
  -1   4 -11 17401.1 498.792   6
  -1   4 -11 17677.9 520.354   2
   1  -4 -11 18267.3 477.189   2
   1   4  11 18570.0 516.403   6
   1   4  11 17510.8 425.461  22
   1  -4 -11 17382.6 477.996  12
   1   4  12 15986.8 396.899  22
  -1   4 -12 15440.7 468.631   6
   1   4  12 16358.3 486.430   6
  -1   4 -12 16842.8 504.635   2
  -1  -4  12 16234.2 436.216  23
  -1  -4  12 16585.9 449.759  10
   1   4  12 16442.8 583.553   3
   1   4  12 16460.2 456.711   7
   1  -4 -12 16388.5 455.259  12
   1   4  12 14788.0 408.425  13
  -1  -4  12 15865.4 422.609   7
  -1  -4  12 16739.1 518.822   2
   1  -4 -12 16220.1 451.278   2
   1   4  12 16008.6 435.561  17
   1   4  13 7415.80 287.840   6
   1   4  13 7206.32 227.975  13
  -1   4 -13 7435.26 303.036   2
   1   4  13 7406.38 370.964   3
   1   4  13 7181.65 211.187  22
  -1  -4  13 7519.95 251.186  23
   1   4  13 7487.80 267.216   7
  -1  -4  13 6882.32 312.195   2
  -1  -4  13 7773.65 263.938  10
   1   4  13 7389.50 247.078  17
  -1   4 -13 7417.71 278.145   6
   1  -4 -13 7244.26 260.693  12
   1  -4 -13 7269.82 261.592   2
  -1  -4  13 7180.95 236.762   7
   1   4  14 18638.2 470.586  22
   1   4  14 19873.0 574.393   6
  -1   4 -14 19545.6 555.597   6
  -1  -4  14 19884.3 535.558  10
   1   4  14 19204.4 515.687  17
  -1  -4  14 18972.5 517.102  23
   1   4  14 18341.7 488.998  13
   1  -4 -14 19457.3 535.340  12
   1   4  15 389.687 45.8222  16
   1   4  15 492.366 73.5488  17
  -1  -4  15 474.186 75.6036  23
  -1  -4  15 497.880 77.2885  10
   1   4  15 464.341 55.2426  22
  -1   4 -15 482.931 68.4591   6
   1  -4 -15 496.043 73.7140  12
  -1  -4  16 37009.3 931.661  10
   1  -4 -16 37636.0 928.214  12
  -1  -4  16 36375.1 914.453  23
   1   4  16 35831.9 846.030  16
   1   4  16 37095.3 860.144  22
   1   4  16 37038.5 913.914  17
   1   4  17 7091.67 265.563  17
   1  -4 -17 7394.96 274.446  12
  -1  -4  17 7296.19 280.811  10
  -1  -4  17 7017.79 267.649  23
   1   4  17 6780.51 208.698  16
   1   4  18 5162.52 246.436  10
  -1  -4  18 5080.17 234.913  10
   1  -4 -18 5182.71 228.651  12
   1   4  18 5041.97 169.383  16
   1   4  18 5112.91 224.737  17
  -1  -4  18 5188.51 228.685  23
  -1  -4  19 28134.6 768.292  10
   1   4  19 27799.0 776.774  10
  -1  -4  19 27593.7 748.997  23
   1   4  19 27663.1 745.860  17
   1   4  19 28365.1 667.678  16
   1  -4 -19 27305.8 752.877   9
   1  -4 -20 1227.71 113.175   9
  -1  -4  20 1445.58 131.115  10
   1   4  20 1316.41 137.987  10
   1   4  20 1382.22 126.618  17
  -1  -4  20 1479.97 133.487  23
   1   4  20 1357.18 81.1089  16
   1   4  21 3868.04 200.790  17
   1  -4 -21 3660.22 191.065   9
  -1  -4  21 3294.63 194.511  23
  -1  -4  21 3629.20 208.179  10
   1   4  21 3655.88 218.834  10
  -1  -4  22 26630.7 729.780  10
   1  -4 -22 24296.4 685.190   9
   1   4  22 25776.0 705.533  17
   1   4  22 24601.7 736.424  10
  -1  -4  22 25672.6 711.241  23
  -1  -4  23 45518.1 1166.17  10
   1  -4 -23 47632.4 1132.11  24
  -1  -4  23 44267.8 1148.38  23
   1   4  23 45130.3 1146.09  17
   1   4  23 45397.6 1185.28  10
  -1  -4  24 13171.6 442.349  23
   1   4  24 13733.1 470.523  10
   1  -4 -24 13623.4 418.288  24
   1   4  25 21050.2 634.542  10
   1  -4 -25 20989.4 573.321  24
  -1  -4  25 21604.6 610.437  23
   1   4  25 21189.9 616.709  23
   1   4  26 2015.09 159.805  10
   1   4  26 1928.87 147.855  23
  -1  -4  26 1868.83 142.948  23
   1   4  27 566.685 101.309  10
  -1  -4  27 459.245 89.1439  23
   1   4  27 437.397 86.0148  23
   1   4  28 194.315 74.3849  23
  -1  -4  28 227.373 70.1708  23
   1   4  28 316.492 83.3106  10
   1   4  29 1999.44 130.783  10
   1   4  29 1974.86 124.062  23
  -1  -4  29 1944.09 117.555  23
   1   4  30 1600.93 100.531  23
  -1  -4  30 1525.14 94.6414  23
   1   4  30 1487.56 102.290  10
   1   4  31 11979.5 337.985  10
   1   4  31 12737.0 335.350  23
  -1  -4  31 12495.1 326.382  23
   1   5 -31 8812.72 247.605  21
   1  -5  31 8669.27 247.937  23
   1   5 -30 9847.25 292.583  21
   1  -5  30 9967.41 294.386  23
  -1   5  30 9934.45 287.810  23
  -1   5  29 1730.79 109.693  23
   1  -5  29 1750.37 114.412  23
   1   5 -29 1884.01 99.6802  13
   1  -5  28 4115.52 190.051  23
   1   5 -28 4312.22 175.672  13
  -1   5  28 4202.55 186.989  23
  -1   5  27 9402.30 319.525  23
   1  -5  27 8953.45 321.871  23
   1   5 -27 9232.15 306.924  13
  -1   5  26 6743.08 254.873  10
  -1   5  26 7040.00 276.698  23
   1   5 -26 7315.84 271.831  13
   1  -5  26 6974.76 280.452  23
  -1   5  25 10635.4 354.531  10
   1  -5  25 10898.4 379.668  23
  -1   5  24 7164.76 274.640  10
   1  -5  24 6478.24 289.155  23
  -1   5  23 9047.50 329.563  10
   1  -5  23 8324.38 360.438  10
  -1   5  22 54552.6 1319.36  17
  -1   5  22 52677.0 1307.48  10
   1  -5  22 53117.0 1325.65  23
   1  -5  22 53494.3 1351.81  10
  -1   5  21 25338.2 703.333  10
  -1   5  21 25300.0 710.695  17
   1  -5  21 25479.9 743.396  10
   1  -5  21 25272.7 716.695  23
  -1   5  20 12744.1 416.703  17
   1  -5  20 12665.9 445.443  10
  -1   5  20 11929.8 406.061  10
   1  -5  20 12412.8 425.116  23
  -1   5  19 13935.7 444.681  10
  -1   5  19 14019.5 449.126  17
   1  -5  19 14194.9 476.128  10
   1  -5  19 14350.4 459.849  23
  -1   5  18 1133.49 109.481  10
   1  -5  18 1158.13 129.772  10
  -1   5  18 1343.59 121.566  17
   1  -5  18 1176.08 123.619  23
  -1   5  17 7746.98 282.144  10
   1  -5  17 6894.52 281.328  23
   1  -5  17 7470.24 302.685  10
  -1   5  17 7401.55 280.202  17
   1  -5  16 29544.2 785.721  10
   1  -5  16 28395.1 762.840  23
  -1   5  16 29116.4 757.107  17
  -1   5  16 29432.4 756.826  10
  -1   5  15 13095.5 392.132  17
   1  -5  15 12971.7 412.337  10
   1  -5  15 12373.7 393.795  23
   1   5 -15 12336.5 361.432   8
  -1   5  15 12627.7 385.964  10
   1  -5  14 8137.07 285.540  23
  -1   5  14 7980.78 275.199  10
  -1   5  14 7956.28 276.995  17
   1  -5  14 8566.96 302.557  10
   1  -5  13 10364.5 299.724  16
  -1   5  13 10834.5 329.435  17
   1  -5  13 10731.0 348.868  10
  -1   5  13 10625.2 328.589  10
   1  -5  13 10760.0 336.685  23
   1  -5  12 25079.5 628.098  16
  -1   5  12 27028.0 820.080   1
  -1  -5 -12 27289.4 754.009   1
  -1  -5 -12 25820.4 790.326   2
  -1   5  12 25968.0 658.838  10
   1  -5  12 26227.2 667.172  23
  -1   5  12 26794.4 661.358  17
   1  -5  12 26075.4 680.945  10
   1  -5  12 26038.1 798.302   2
  -1   5  11 28332.7 695.601  10
  -1  -5 -11 29585.9 790.871   1
   1  -5  11 27506.9 714.587  10
  -1   5  11 27219.6 695.239   5
  -1   5  11 29295.0 697.557  17
   1  -5  11 30802.5 836.545   2
  -1   5  11 28294.0 840.445   1
   1  -5  11 26877.1 665.294  16
  -1  -5 -11 26183.3 815.701   2
   1  -5  11 29101.6 706.037  23
  -1   5  10 17401.7 552.824   1
   1  -5  10 14995.6 374.470   4
   1  -5  10 15841.5 435.398  10
  -1   5  10 16454.9 419.511  17
   1  -5  10 16342.5 427.714  23
   1  -5  10 14222.5 373.411   1
   1  -5  10 15023.1 391.867  16
  -1  -5 -10 15689.9 503.557   3
  -1   5  10 15877.6 421.310   5
   1  -5  10 16329.1 522.491   2
  -1  -5 -10 17857.5 516.453   1
   1  -5   9 61763.1 1373.26  10
   1  -5   9 61256.0 1361.57  23
  -1  -5  -9 65988.6 1468.98   1
  -1   5   9 62333.0 1354.15  17
  -1   5   9 61537.0 1358.46   5
   1  -5   9 61962.2 1326.05  16
   1  -5   9 64045.4 1465.89   2
  -1  -5  -9 61238.1 1462.32   3
  -1   5   9 66312.8 1509.07   1
   1  -5   8 19779.2 455.313  23
   1  -5   8 20263.1 531.535   2
  -1   5   8 20292.5 456.025   5
  -1   5   8 20594.2 565.530   1
  -1  -5  -8 20782.9 550.979   1
  -1  -5  -8 19039.1 540.294   3
  -1  -5  -7 43333.3 1146.71   1
  -1  -5  -7 46027.7 1154.70   3
   1  -5   7 46005.1 1118.40   2
  -1  -5  -6 39634.2 1014.37   3
   1  -5   6 39590.0 963.504   2
  -1   5   6 39135.7 1003.32   1
   1  -5   5 29879.1 737.302   2
  -1   5   5 29690.7 781.515   1
  -1  -5  -5 29575.8 800.491   3
  -1   5   4 32442.8 782.392   1
   1  -5   4 32274.4 731.113   2
  -1  -5  -4 33076.0 816.274   3
   1  -5   3 25896.9 582.584   1
  -1  -5  -3 27115.5 724.873   3
   1  -5   3 26793.3 634.186   2
   1  -5   2 177627. 3910.46   2
   1   5  -2 189971. 3918.65   5
   1  -5   2 177956. 3883.42   1
   1  -5   1 45672.2 998.220   2
   1  -5   1 42342.4 990.986   1
   1   5  -1 44008.8 1098.17   4
   1   5  -1 46189.6 1018.34   5
   1  -5   0 2937.96 98.0262   2
   1   5   0 3024.98 121.097   5
   1   5   0 2934.83 163.076   4
   1  -5   0 2776.73 105.955   1
   1  -5  -1 46317.6 1020.23   2
  -1   5  -1 44733.3 1040.87   4
   1  -5  -1 44675.4 1052.41   1
   1   5   1 42642.1 1125.61   4
   1   5   1 47249.2 1004.21   7
   1   5   1 48864.6 1069.91   5
  -1  -5   2 189251. 4101.31   4
   1   5   2 188254. 3983.66   7
   1   5   2 180753. 4109.93   4
   1  -5  -2 184859. 3999.02   3
  -1   5  -2 170702. 4000.60   4
   1  -5  -2 189716. 3986.00   2
   1   5   2 201189. 4051.04   5
   1   5   3 27664.6 659.238   5
  -1   5  -3 25571.7 645.423   7
   1  -5  -3 27183.7 606.112   3
  -1  -5   3 27911.9 711.010   4
   1   5   3 26115.6 605.067   7
  -1  -5   4 31277.0 827.242   4
   1  -5  -4 32726.2 731.344   2
  -1   5  -4 31724.4 764.883   7
   1   5   4 31981.5 781.466   5
  -1  -5   5 29699.7 773.110   4
   1  -5  -5 30435.8 668.523   2
  -1   5  -5 29181.5 696.749   7
   1  -5  -6 39249.8 891.468   2
  -1   5  -6 38884.4 916.645   7
  -1  -5   6 39873.8 1006.14   4
  -1  -5   7 44950.6 1158.30   4
  -1   5  -7 45510.0 1062.14   7
   1  -5  -7 46654.0 1043.60   2
   1  -5  -8 20157.4 497.625   2
   1   5   8 20229.4 487.583  13
   1   5   8 20795.6 468.705  24
  -1   5  -8 20359.7 511.157   7
   1  -5  -8 19859.5 503.866  15
  -1  -5   8 19463.2 600.114   4
   1  -5  -8 19885.5 523.188  12
   1  -5  -9 61334.3 1397.91   2
  -1  -5   9 63108.7 1529.07   4
   1  -5  -9 62228.3 1425.06  12
   1   5   9 62666.9 1381.70  13
  -1  -5   9 58615.1 1365.57   7
  -1  -5   9 62488.7 1400.66  23
   1  -5  -9 62522.1 1402.28  15
   1   5   9 63685.7 1410.50   7
   1   5  10 16005.6 408.965  13
   1  -5 -10 16016.1 430.170   2
   1  -5 -10 15947.6 447.820  12
   1   5  10 16812.3 442.591   7
  -1  -5  10 16603.9 431.711  23
  -1  -5  10 15484.9 401.280   7
   1   5  10 15742.4 393.085  22
   1  -5 -10 16657.3 431.604  15
  -1  -5  10 15776.8 533.375   4
   1  -5 -11 29477.7 697.807  15
  -1  -5  11 27087.2 668.988   7
   1  -5 -11 27478.8 713.424  12
   1  -5 -11 28570.9 702.633   2
  -1   5 -11 27917.6 741.662   6
   1   5  11 28319.8 709.918   7
   1   5  11 28687.0 653.791  22
   1   5  11 27841.4 749.296   6
  -1  -5  11 28930.6 698.233  23
  -1  -5  11 27904.2 821.414   4
   1   5  12 25881.7 676.377   7
  -1  -5  12 25931.7 677.282  10
   1  -5 -12 27186.2 662.584  15
   1   5  12 26125.2 660.855  17
   1  -5 -12 26224.1 669.673   2
   1   5  12 27180.0 728.090   6
  -1  -5  12 24514.6 742.453   2
   1   5  12 25783.9 614.141  22
   1  -5 -12 26169.4 679.998  12
  -1  -5  12 26291.0 661.809  23
  -1  -5  12 26270.2 792.185   4
  -1   5 -12 25983.3 703.711   6
  -1  -5  13 9793.41 424.185   4
   1  -5 -13 10607.9 328.590  15
  -1   5 -13 10475.2 361.997   6
   1   5  13 10641.2 285.919  22
   1   5  13 10458.0 327.897  17
   1   5  13 10693.1 346.381   7
  -1  -5  13 10829.1 330.924  23
   1  -5 -13 10508.8 343.994  12
  -1  -5  13 10736.6 342.743  10
  -1   5 -14 7923.30 307.051   6
   1   5  14 8602.11 240.540  22
  -1  -5  14 8428.51 285.535  23
  -1  -5  14 8216.96 295.979  10
   1  -5 -14 8246.45 294.478  12
   1   5  14 7763.92 277.714  17
   1   5  15 12268.3 323.695  16
  -1  -5  15 13108.9 405.789  10
   1  -5 -15 12308.1 395.028  12
  -1  -5  15 12964.2 390.253  23
   1   5  15 12541.8 385.787  17
   1   5  15 12907.7 338.425  22
   1   5  16 29157.1 685.048  22
   1  -5 -16 28249.3 750.937  12
   1   5  16 27678.8 666.832  16
  -1  -5  16 27981.3 741.839  23
   1   5  16 28831.6 742.800  17
  -1  -5  16 29156.6 764.227  10
   1   5  16 28210.9 766.830  10
  -1  -5  17 7444.08 283.218  23
   1   5  17 7303.52 279.108  17
  -1  -5  17 7393.92 296.150  10
   1  -5 -17 7525.23 285.609  12
   1   5  17 7538.97 304.766  10
  -1  -5  18 1121.55 120.833  10
  -1  -5  18 1189.82 118.363  23
   1   5  18 1364.77 134.094  10
   1   5  18 1159.22 115.762  17
   1  -5 -18 1228.70 113.950  12
  -1  -5  19 13809.1 450.776  23
   1   5  19 14201.2 449.841  17
  -1  -5  19 14940.3 474.366  10
   1   5  19 14243.2 475.851  10
   1   5  20 12618.7 444.007  10
   1   5  20 12670.8 416.667  17
  -1  -5  20 12590.0 419.518  23
   1  -5 -20 12336.9 419.077   9
   1  -5 -21 24755.0 701.144   9
   1   5  21 25528.7 737.436  10
  -1  -5  21 26068.3 710.948  23
   1   5  21 25047.5 705.398  17
   1   5  22 52592.8 1340.85  10
   1   5  22 53706.3 1303.38  17
  -1  -5  22 53230.8 1305.80  23
   1  -5 -22 52131.4 1292.54   9
   1   5  23 9101.53 339.881  17
   1   5  23 9326.06 367.955  10
  -1  -5  23 9068.95 342.807  23
   1  -5 -23 8870.53 318.745   9
   1  -5 -24 6966.59 272.230  24
   1   5  24 7082.74 311.761  10
  -1  -5  24 7320.56 293.414  23
   1   5  24 7039.99 287.686  17
   1  -5 -25 10537.3 340.650  24
  -1  -5  25 10041.6 359.996  23
   1   5  25 10523.1 386.875  10
   1   5  26 6605.46 284.769  10
   1  -5 -26 6975.74 245.631  24
   1   5  26 7046.11 278.223  23
  -1  -5  26 6858.05 271.160  23
   1   5  27 9697.47 328.576  23
  -1  -5  27 9400.67 320.091  23
   1   5  27 9350.48 338.119  10
   1   5  28 4146.53 195.190  10
   1   5  28 4132.36 188.894  23
  -1  -5  28 4204.43 182.972  23
   1   5  29 1856.74 120.942  10
  -1  -5  29 1889.30 111.680  23
   1   5  29 1876.00 115.398  23
  -1  -5  30 9670.44 279.883  23
   1   5  30 9500.52 292.558  10
   1   5  30 10059.2 288.799  23
   1   5  31 8687.22 244.884  23
  -1   6  30 22729.4 552.306  23
   1  -6  30 22674.3 559.184  23
   1   6 -30 22316.6 554.539  21
   1   6 -29 2347.91 119.678  21
   1  -6  29 2457.30 126.537  23
  -1   6  29 2501.08 123.736  23
   1   6 -28 1763.93 97.4596  13
   1  -6  28 1882.02 124.121  23
  -1   6  28 2021.95 120.814  23
  -1   6  27 1352.67 111.238  23
   1   6 -27 1176.19 90.0063  13
   1  -6  27 1131.05 108.641  23
   1  -6  27 1159.35 81.4408  20
   1   6 -26 9343.58 310.584  13
   1  -6  26 9489.29 335.676  23
   1  -6  25 3650.35 196.659  23
  -1   6  25 3293.95 167.848  10
   1   6 -25 3743.60 182.327  13
   1   6 -24 18033.8 526.546  13
   1  -6  24 17784.9 546.452  23
  -1   6  24 18107.7 520.853  10
   1   6 -23 6939.26 281.520  13
  -1   6  23 7415.16 295.593  17
  -1   6  23 7301.18 281.256  10
   1  -6  23 6973.49 302.304  23
   1  -6  22 12345.8 448.376  10
  -1   6  22 12760.7 413.086  10
   1  -6  22 11837.6 426.203  23
  -1   6  22 12938.2 425.199  17
  -1   6  21 13758.9 450.059  17
  -1   6  21 13808.7 441.921  10
   1  -6  21 13120.3 454.993  23
   1  -6  21 14060.1 482.579  10
  -1   6  20 55566.2 1341.71  17
   1  -6  20 54217.1 1374.82  10
  -1   6  20 54482.4 1333.44  10
   1  -6  20 54315.6 1351.05  23
  -1   6  19 16128.5 492.144  17
  -1   6  19 15595.5 483.214  10
   1  -6  19 15579.8 496.437  23
   1  -6  19 15474.6 513.977  10
   1  -6  18 39227.3 1038.44  23
  -1   6  18 41111.0 1032.19  17
  -1   6  18 41167.6 1026.93  10
   1  -6  18 41347.4 1066.81  10
   1  -6  17 3128.30 192.181  10
  -1   6  17 3505.18 184.351  17
   1  -6  17 3221.26 188.507  23
  -1   6  17 3144.84 171.682  10
   1  -6  16 1956.25 148.802  10
   1  -6  16 1968.16 144.539  23
  -1   6  16 1972.66 136.724  17
  -1   6  16 1833.92 128.394  10
   1  -6  15 15063.0 477.589  10
  -1   6  15 15471.3 453.709  10
   1  -6  15 15390.2 464.176  23
   1   6 -15 15234.1 423.009   8
  -1   6  15 15146.4 453.553  17
   1  -6  14 3802.68 185.219  23
  -1   6  14 3756.43 176.270  10
   1   6 -14 3874.73 161.299   8
   1  -6  14 3959.21 198.509  10
  -1   6  14 3978.99 182.306  17
   1   6 -13 2654.09 127.892   8
   1  -6  13 2580.93 146.598  23
  -1   6  13 2475.35 136.497  10
   1  -6  13 2617.86 153.831  10
  -1   6  13 2613.12 141.234  17
   1  -6  12 36786.6 914.520  10
   1   6 -12 36035.6 873.326   8
  -1   6  12 36516.9 890.779  17
   1  -6  12 37027.1 901.365  23
  -1   6  12 35563.2 897.855   5
  -1   6  12 36762.9 890.005  10
  -1   6  11 11490.0 472.821   1
   1  -6  11 11595.1 361.440  10
  -1   6  11 11726.5 342.652  17
   1   6 -11 11325.7 331.361   8
   1  -6  11 11559.9 443.025   2
  -1   6  11 11711.9 343.340  10
   1  -6  11 11570.2 350.730  23
  -1  -6 -11 10677.3 442.646   2
  -1   6  11 11036.5 347.272   5
  -1   6  10 166538. 3817.65   1
  -1   6  10 165915. 3629.61  10
  -1  -6 -10 171393. 3760.69   1
   1  -6  10 167460. 3760.12   2
  -1  -6 -10 165921. 3752.01   3
   1  -6  10 163813. 3638.60  23
   1  -6  10 166365. 3650.91  10
   1   6 -10 161466. 3619.25   8
  -1   6  10 166349. 3628.95  17
  -1   6  10 166308. 3644.47   5
   1   6  -9 6425.46 217.723   8
   1  -6   9 6851.25 239.765  10
  -1  -6  -9 7071.55 301.492   3
   1  -6   9 6933.15 233.909  23
  -1   6   9 6772.19 323.773   1
   1   6  -9 6472.25 226.557  13
  -1   6   9 6948.68 235.313   5
  -1  -6  -9 6417.10 289.496   1
  -1   6   9 6741.78 224.705  10
   1  -6   9 6972.19 291.255   2
   1  -6   8 7509.12 245.742  23
  -1  -6  -8 7555.20 314.265   3
  -1   6   8 7709.53 248.399   5
   1  -6   8 7270.33 249.029  10
   1   6  -8 7413.06 235.514   8
   1  -6   8 7771.06 297.184   2
   1   6  -8 7503.43 241.808  13
  -1   6   8 7656.43 336.936   1
   1   6  -7 47805.2 1119.87   8
  -1  -6  -7 49451.8 1240.34   3
  -1   6   7 48863.0 1257.65   1
   1  -6   7 50077.1 1193.90   2
   1  -6   7 48688.6 1131.52  23
   1  -6   6 157432. 3423.61   2
  -1  -6  -6 155683. 3495.96   3
   1  -6   6 151736. 3372.85  23
   1  -6   5 4766.75 183.609   2
  -1  -6  -5 5023.14 239.192   1
  -1  -6  -5 5326.80 246.907   3
  -1  -6  -4 122482. 2629.16   3
   1  -6   4 126138. 2521.58   2
  -1  -6  -4 125833. 2645.21   1
  -1  -6  -3 187446. 3983.52   1
   1  -6   3 189482. 3846.80   2
  -1  -6  -3 184540. 3971.19   3
   1  -6   2 15970.5 399.546   2
   1   6  -2 16610.2 410.383   5
   1   6  -1 54310.0 1382.63   4
   1  -6   1 55000.8 1270.18   1
   1  -6   1 56795.3 1272.01   2
   1  -6   0 7336.14 204.376   2
   1   6   0 7137.72 292.804   4
   1  -6   0 7316.87 218.869   1
   1   6   0 7635.82 236.362   5
  -1   6   0 6796.50 223.648   4
   1   6   1 55386.7 1399.75   4
   1  -6  -1 59898.3 1274.22   2
  -1   6  -1 55210.7 1298.73   4
   1  -6  -1 55323.8 1304.70   1
   1   6   1 57528.4 1241.80   7
   1   6   1 60060.3 1324.08   5
   1   6   2 15295.1 350.547   7
  -1   6  -2 14510.7 384.100   4
   1  -6  -2 15317.2 407.895   1
   1   6   2 15764.2 419.695   5
   1  -6  -2 15321.0 364.170   2
   1   6   2 14852.1 479.414   4
   1  -6  -2 14527.7 382.428   3
  -1   6  -3 179361. 3993.41   7
  -1  -6   3 187785. 4075.68   4
   1  -6  -3 179814. 3958.80   3
   1   6   3 177838. 4089.29   4
   1  -6  -4 125653. 2724.35   3
   1   6   4 131604. 2790.54   5
  -1   6  -4 121530. 2760.08   7
  -1  -6   4 128450. 2846.25   4
   1   6   4 119936. 2857.04   4
  -1  -6   5 4969.71 211.036   2
  -1   6  -5 5016.04 180.251   7
  -1  -6   5 4815.01 227.521   4
   1  -6  -5 5103.18 162.473   2
   1   6   5 5213.24 200.211   5
   1  -6  -6 159134. 3418.77   2
   1  -6  -6 154718. 3430.29  15
  -1  -6   6 158058. 3540.30   4
   1  -6  -6 160047. 3455.45  12
  -1   6  -6 151820. 3437.25   7
   1   6   6 159684. 3414.28  13
  -1  -6   6 153586. 3499.33   2
   1   6   6 156875. 3433.32  19
   1  -6  -6 159922. 3443.02  23
  -1  -6   7 47429.2 1133.49  23
   1  -6  -7 48665.4 1134.80  15
   1  -6  -7 50029.8 1147.53  23
   1  -6  -7 48640.7 1122.52   2
   1   6   7 51975.8 1097.03  24
   1   6   7 49495.0 1138.85  19
   1   6   7 49852.3 1117.30  13
  -1   6  -7 47239.6 1137.77   7
  -1  -6   7 48387.7 1239.66   4
  -1  -6   7 48614.0 1201.49   2
   1  -6  -7 48638.5 1157.04  12
  -1  -6   8 7576.06 289.679   2
   1  -6  -8 7342.72 254.368  12
  -1  -6   8 7348.14 239.146  23
  -1   6  -8 7213.60 237.608   7
   1  -6  -8 7408.66 237.784  15
  -1  -6   8 7540.83 315.138   4
   1  -6  -8 7543.75 228.558   2
   1   6   8 7525.42 221.908  13
   1   6   8 7739.71 206.265  24
   1  -6  -9 6956.08 223.083   2
   1  -6  -9 6894.44 247.402  12
  -1   6  -9 6963.14 231.843   7
   1  -6  -9 6908.17 229.278  15
   1   6   9 6963.97 197.039  22
   1   6   9 7180.36 215.429  13
  -1  -6   9 6911.01 283.380   2
  -1  -6   9 7052.12 312.317   4
  -1  -6   9 7012.43 231.999  23
   1   6  10 169320. 3629.19  22
   1  -6 -10 165555. 3701.81  12
  -1  -6  10 169518. 3822.79   4
   1  -6 -10 167011. 3677.63  15
  -1  -6  10 167231. 3679.40  23
   1   6  10 168211. 3685.65   7
   1   6  10 167850. 3652.60  13
   1   6  11 11799.9 323.746  13
   1  -6 -11 11412.6 362.989  12
   1  -6 -11 11500.6 342.931  15
  -1  -6  11 11493.0 442.024   4
   1   6  11 11623.0 302.028  22
   1   6  11 11593.1 351.949   7
  -1  -6  11 11334.3 344.454  23
   1  -6 -12 36123.3 880.939  15
  -1  -6  12 34980.4 1009.21   4
   1   6  12 37141.2 858.852  13
   1   6  12 35271.1 883.880  17
  -1  -6  12 36185.0 885.411  23
  -1   6 -12 36141.7 935.262   6
   1   6  12 35890.8 897.141   7
   1   6  12 36447.1 829.832  22
   1  -6 -12 35195.0 901.284  12
   1   6  13 2389.38 141.565  17
   1   6  13 2573.48 107.193  22
   1  -6 -13 2589.01 142.462  15
   1   6  13 2650.39 127.031  13
   1  -6 -13 2742.02 152.634  12
  -1  -6  13 2580.73 143.992  23
   1   6  14 4073.29 142.663  22
  -1  -6  14 3846.85 180.503  23
   1   6  14 3482.36 191.093  10
   1   6  14 3647.32 159.168  13
   1   6  14 3935.94 180.458  17
   1  -6 -14 3666.83 186.099  12
   1  -6 -15 14983.0 462.170  12
  -1  -6  15 15505.2 456.667  23
   1   6  15 15899.6 397.261  22
   1   6  15 14123.4 418.072  13
   1   6  15 14905.7 452.358  17
   1   6  15 15683.1 480.071  10
   1   6  16 1885.84 135.671  17
   1  -6 -16 1971.33 138.443  12
   1   6  16 1888.03 151.492  10
   1   6  16 1899.55 101.164  22
  -1  -6  16 1925.41 137.070  23
   1   6  17 3207.31 178.357  17
   1   6  17 3157.77 193.340  10
  -1  -6  17 3240.05 181.667  23
   1  -6 -17 3284.50 181.156  12
   1   6  18 40217.7 1006.68  17
   1  -6 -18 41080.9 1009.94  12
  -1  -6  18 39414.6 1007.14  23
  -1  -6  19 15834.9 487.966  23
   1   6  19 15973.7 514.143  10
   1  -6 -19 15260.8 478.570  12
   1   6  19 15070.4 481.003  17
   1   6  20 53607.3 1353.17  10
   1   6  20 53872.1 1322.35  17
  -1  -6  20 53769.7 1325.42  23
   1   6  21 13538.6 476.783  10
   1  -6 -21 13175.7 444.046   9
  -1  -6  21 14620.2 457.882  23
   1   6  21 13732.7 450.080  17
   1   6  22 12453.4 416.058  17
  -1  -6  22 11822.3 411.903  23
   1   6  22 12575.5 444.486  10
   1  -6 -22 12266.9 410.741   9
   1   6  23 7195.92 287.742  17
   1  -6 -23 6531.25 265.193   9
  -1  -6  23 7068.71 288.450  23
   1   6  23 6858.08 307.243  10
   1   6  24 18115.8 540.159  17
   1  -6 -24 18961.4 538.143  24
  -1  -6  24 18382.5 547.159  23
   1   6  24 17882.1 568.082  10
   1  -6 -25 3502.14 174.442  24
  -1  -6  25 3340.36 185.295  23
   1   6  25 3244.64 194.792  10
   1  -6 -26 9243.17 307.588  24
  -1  -6  26 10050.4 337.503  23
   1   6  26 10005.1 353.335  10
   1   6  26 10000.3 340.354  23
   1   6  27 1292.71 117.916  10
   1   6  27 1201.25 110.817  23
  -1  -6  27 1368.30 111.695  23
   1  -6 -27 1264.17 86.6366  24
   1   6  28 1810.66 119.520  23
   1   6  28 1872.25 124.402  10
  -1  -6  28 1846.58 116.908  23
   1   6  29 2458.30 128.769  10
   1   6  29 2500.63 125.117  23
  -1  -6  29 2432.62 119.709  23
  -1  -6  30 22014.4 534.412  23
   1   6  30 23043.6 545.187  23
   1  -7  30 4959.99 162.714  23
  -1   7  29 3979.40 151.076  23
   1  -7  29 3904.56 155.480  23
   1   7 -29 3828.67 146.882  21
   1   7 -28 8666.96 269.284  21
   1  -7  28 8219.89 274.434  23
  -1   7  28 8329.33 269.915  23
  -1   7  27 464.330 76.8002  23
   1  -7  27 551.605 87.4091  23
   1   7 -27 498.439 69.4729  21
   1   7 -26 2158.27 118.129  13
   1  -7  26 2463.24 151.910  23
   1   7 -25 9299.77 305.874  13
   1  -7  25 9751.09 342.414  23
  -1   7  24 1526.21 113.054  10
   1  -7  24 1419.34 135.125  23
   1   7 -24 1350.39 110.360  13
   1  -7  24 1339.66 97.8414  20
   1  -7  23 5797.48 264.672  23
   1   7 -23 5753.70 237.954  13
  -1   7  23 5939.27 258.221  17
  -1   7  23 5451.93 234.601  10
   1  -7  22 4916.89 251.991  23
  -1   7  22 5256.92 230.336  10
  -1   7  22 5281.41 245.952  17
   1   7 -22 5353.01 233.055  13
   1   7 -21 23244.2 650.300  13
  -1   7  21 23866.5 668.722  17
   1  -7  21 22900.2 678.207  23
  -1   7  21 23701.5 656.659  10
  -1   7  20 9381.48 349.024  17
   1   7 -20 9547.28 339.778  13
  -1   7  20 9139.81 337.379  10
   1  -7  20 9770.25 362.787  23
   1  -7  19 10640.0 387.074  23
  -1   7  19 10722.2 374.412  17
  -1   7  19 10489.5 366.349  10
   1   7 -19 10534.2 364.173  13
  -1   7  18 1172.94 119.647  17
   1  -7  18 1050.79 127.788  23
   1   7 -18 1026.28 110.320  13
  -1   7  18 1189.63 114.226  10
  -1   7  17 9225.43 328.140  10
   1  -7  17 9117.88 342.319  23
   1   7 -17 9086.92 324.539  13
  -1   7  17 9154.83 333.010  17
  -1   7  16 11671.9 379.523  10
   1  -7  16 11666.4 393.608  23
  -1   7  16 11792.5 384.807  17
   1   7 -16 11132.1 373.083  13
   1  -7  16 11452.2 405.733  10
  -1   7  15 81324.4 1877.77  10
  -1   7  15 81128.1 1880.23  17
   1  -7  15 81045.4 1910.21  10
   1   7 -15 80245.6 1873.79  13
   1   7 -15 81838.2 1839.29   8
   1  -7  15 81047.5 1893.70  23
  -1   7  14 36028.1 910.040  17
   1  -7  14 36354.9 924.955  23
  -1   7  14 36126.5 910.150  10
   1   7 -14 35260.4 904.610  13
   1   7 -14 37289.6 882.546   8
   1   7 -13 3578.88 172.682  13
   1  -7  13 3643.35 183.805  23
  -1   7  13 3703.28 174.833  10
  -1   7  13 3844.94 179.141  17
   1   7 -13 3697.91 159.492   8
  -1   7  12 16850.2 474.393  17
   1   7 -12 16914.7 471.732  13
   1   7 -12 16625.0 454.553   8
   1  -7  12 16828.4 485.055  23
  -1   7  12 16362.4 471.801  10
   1   7 -11 37035.1 882.815   8
  -1   7  11 36803.7 897.966  10
  -1   7  11 35385.3 912.588   5
   1  -7  11 36952.9 909.576  23
  -1   7  11 36908.0 896.303  17
   1   7 -11 36200.3 896.466  13
  -1   7  10 47848.8 1091.21  10
   1  -7  10 46430.4 1210.84   2
   1  -7  10 45590.5 1096.52  23
  -1   7  10 44578.2 1104.92   5
   1   7 -10 44904.7 1071.04   8
  -1   7  10 45898.2 1083.33  17
  -1  -7 -10 43970.5 1196.89   3
   1   7 -10 45561.1 1082.83  13
   1  -7   9 23988.4 711.837   2
   1   7  -9 23867.7 613.835   8
   1  -7   9 24403.5 607.918  20
  -1  -7  -9 24013.0 730.789   3
  -1   7   9 25373.9 647.800   5
   1   7  -9 24400.0 621.490  13
  -1   7   9 24800.4 627.915  10
   1  -7   9 24716.9 635.592  23
  -1   7   8 47264.7 1118.36   5
  -1  -7  -8 46824.7 1224.74   1
   1   7  -8 46757.3 1095.03  13
  -1  -7  -8 44756.3 1213.84   3
   1  -7   8 46161.0 1176.22   2
  -1   7   8 49695.2 1106.40  10
   1   7  -8 45572.7 1088.55   8
   1  -7   8 47084.7 1107.61  23
   1  -7   8 45866.7 1077.95  20
  -1   7   7 24129.3 603.192  10
   1  -7   7 24381.5 663.001   2
   1  -7   7 24251.3 608.364  23
   1   7  -7 22913.9 593.744  13
  -1  -7  -7 23474.4 709.381   3
   1   7  -7 22962.6 592.600   8
  -1  -7  -7 25474.3 729.992   1
   1  -7   7 23318.3 580.530  20
  -1  -7  -6 17956.3 544.592   3
   1  -7   6 17657.8 433.893  23
   1   7  -6 17997.3 417.839  21
   1   7  -6 17483.0 423.075   8
  -1  -7  -6 18460.7 438.182  23
  -1  -7  -6 19132.5 565.304   1
   1   7  -6 17895.7 424.355  13
   1  -7   6 18631.6 481.061   2
  -1  -7  -5 30084.4 841.196   1
   1  -7   5 29525.2 713.525  23
  -1  -7  -5 29988.6 835.226   3
  -1  -7  -5 31183.8 718.763  23
   1   7  -5 31000.7 708.121   8
  -1   7   5 30818.1 704.590  19
   1   7  -5 29467.3 701.436  13
   1  -7   5 29694.2 743.786   2
  -1  -7  -4 50306.3 1092.59  23
   1  -7   4 48632.8 1107.11   2
   1   7  -4 48663.7 1080.43   8
   1  -7   4 47649.0 1082.32  15
  -1  -7  -4 46753.1 1213.99   3
  -1  -7  -4 48742.6 1225.74   1
   1  -7   4 47461.9 1086.96  23
   1  -7   3 2792.07 126.396  15
   1   7  -3 2995.67 128.005   8
   1  -7   3 3157.45 136.410   2
  -1  -7  -3 2922.30 193.454   3
   1  -7   3 2867.86 131.655  23
   1   7  -3 2944.91 133.188   5
   1  -7   3 2847.52 108.216   1
  -1  -7  -3 2841.64 193.319   1
  -1  -7  -3 3325.88 139.839  23
   1  -7   2 27351.2 675.527  23
   1   7  -2 29148.2 673.789   8
   1  -7   2 28534.6 675.838   2
   1  -7   2 26528.7 668.337  15
   1   7  -2 30220.1 693.793   5
   1  -7   2 25283.5 653.341   1
   1   7  -1 63482.5 1397.23   5
   1   7  -1 58658.8 1487.21   4
   1   7  -1 61185.4 1370.54   8
  -1   7   1 60164.2 1401.28   4
   1  -7   1 61572.6 1364.83   2
   1  -7   1 59469.0 1374.22  23
   1  -7   1 58125.1 1362.54   1
   1  -7   0 53157.2 1183.67   2
   1   7   0 51423.9 1318.22   4
   1   7   0 55171.6 1230.06   5
  -1   7   0 49819.4 1217.11   4
   1  -7   0 52656.1 1204.61  23
   1  -7   0 51560.5 1202.66   1
   1   7   0 52331.8 1202.97  19
   1  -7  -1 58106.6 1316.19  23
   1  -7  -1 60397.2 1326.12   1
  -1   7  -1 58117.1 1323.53   4
   1   7   1 58613.8 1435.96   4
   1   7   1 55442.7 1236.28   7
   1  -7  -1 55534.3 1320.70   3
   1   7   1 63380.4 1349.63   5
   1  -7  -1 61838.6 1290.06   2
   1   7   1 60392.6 1316.52  19
   1   7   2 28520.9 689.322   8
  -1   7  -2 27615.9 690.196   4
   1  -7  -2 27540.4 661.597   2
   1   7   2 26715.2 794.162   4
   1  -7  -2 29329.6 713.059   1
   1   7   2 28631.9 635.494   7
   1  -7  -2 30013.1 705.483  23
   1   7   2 28068.1 692.416  19
   1   7   2 29129.0 724.050   5
   1  -7  -2 27097.2 685.609  15
   1  -7  -2 27360.6 687.906   3
   1   7   2 30401.8 654.086  24
   1   7   3 2983.69 119.906  13
   1  -7  -3 2829.64 118.501   3
   1  -7  -3 3126.57 108.801   2
   1   7   3 3053.39 194.521   4
   1  -7  -3 2954.62 128.830  15
  -1   7  -3 2709.00 132.024   7
   1   7   3 3250.69 105.632  24
   1   7   3 3072.43 150.880   5
   1   7   3 3009.18 133.115  19
   1   7   4 49153.5 1260.70   4
   1  -7  -4 48851.1 1128.46  15
   1   7   4 49864.4 1115.32  13
   1  -7  -4 51159.0 1152.00  23
   1   7   4 51932.6 1092.48  24
  -1   7  -4 46237.5 1138.33   7
   1  -7  -4 45777.5 1104.27  20
  -1  -7   4 47606.8 1129.53  23
   1   7   4 49174.3 1135.37  19
   1   7   4 50343.7 1177.93   5
   1  -7  -4 48867.9 1111.00   3
   1   7   5 30279.8 776.379   5
   1  -7  -5 30139.7 729.749  15
  -1  -7   5 30548.8 827.974   4
   1   7   5 31839.8 693.708  24
  -1  -7   5 29375.9 793.740   2
   1  -7  -5 29473.9 720.254   2
   1   7   5 30358.3 853.250   4
   1  -7  -5 29793.3 743.427  23
  -1   7  -5 28735.1 735.451   7
  -1  -7   5 29584.0 730.631  23
   1   7   5 30675.7 714.372  13
   1   7   5 30355.3 736.037  19
   1  -7  -6 18917.3 486.358  23
   1   7   6 18285.0 590.018   4
   1  -7  -6 17579.5 468.471  15
   1   7   6 17595.3 429.821  24
  -1  -7   6 17913.6 470.873  23
  -1   7  -6 17672.8 471.748   7
  -1  -7   6 18447.4 564.340   4
   1  -7  -6 18323.1 495.877  12
  -1  -7   6 17522.3 531.306   2
   1   7   6 17211.3 473.217  19
   1   7   6 18302.6 452.862  13
   1  -7  -6 18179.8 460.373   2
  -1  -7   7 23828.3 672.603   2
  -1  -7   7 23825.4 606.271  23
   1  -7  -7 24785.0 620.683  23
   1  -7  -7 24295.7 604.962  15
  -1   7  -7 23678.8 604.794   7
  -1  -7   7 24439.2 705.500   4
   1   7   7 22714.0 720.808   4
   1  -7  -7 23052.0 587.693   2
   1   7   7 24753.1 585.897  13
   1   7   7 24147.0 610.730  19
   1  -7  -7 24339.7 630.944  12
   1  -7  -8 48124.4 1101.98  15
   1   7   8 49093.9 1079.82  13
   1   7   8 45268.4 1051.00  22
  -1  -7   8 47727.7 1216.19   4
  -1  -7   8 47587.5 1104.49  23
  -1   7  -8 46495.9 1098.68   7
   1  -7  -8 46830.9 1127.67  12
  -1  -7   8 45532.6 1178.09   2
   1   7   9 24460.9 579.150  22
  -1  -7   9 23791.3 727.495   4
   1  -7  -9 24877.7 625.967  15
   1   7   9 25142.3 605.180  13
   1  -7  -9 24572.4 652.322  12
  -1  -7   9 24724.2 631.552  23
   1  -7 -10 45473.5 1116.09  12
   1  -7 -10 46779.1 1089.60  15
   1   7  10 45711.1 1036.35  22
   1  -7 -10 45620.8 1073.69  14
  -1  -7  10 44610.8 1207.82   4
  -1  -7  10 45915.4 1095.77  23
   1   7  10 47891.2 1066.82  13
   1   7  10 44939.8 1089.51   7
   1   7  11 37828.8 877.396  13
  -1  -7  11 37615.2 910.271  23
   1   7  11 36020.3 906.425   7
  -1  -7  11 34176.4 1013.39   4
   1  -7 -11 38075.5 905.096  15
   1  -7 -11 36105.9 924.613  12
   1   7  11 36972.1 845.697  22
   1   7  12 17029.5 417.738  22
   1  -7 -12 16858.1 472.517  15
  -1  -7  12 16708.3 478.159  23
   1   7  12 15644.9 495.543  10
   1  -7 -12 16399.6 491.379  12
   1   7  12 17160.6 448.961  13
   1   7  13 3663.74 179.684  17
   1  -7 -13 3916.28 182.045  15
   1   7  13 3871.29 200.390  10
   1   7  13 3765.67 159.715  13
   1   7  13 3642.11 134.633  22
  -1  -7  13 3761.36 181.915  23
   1  -7 -13 3700.98 186.775  12
  -1  -7  14 36072.4 906.691  23
   1   7  14 36468.9 833.312  22
   1   7  14 35296.1 929.015  10
   1   7  14 35532.6 869.312  13
   1  -7 -14 34498.8 912.566  12
   1   7  14 35961.7 904.594  17
   1   7  15 81538.1 1910.21  10
   1   7  15 80634.4 1876.36  17
   1   7  15 82632.4 1841.18  13
   1   7  15 81265.5 1799.26  22
   1  -7 -15 77899.7 1887.10  12
  -1  -7  15 80530.8 1879.19  23
   1   7  16 10413.8 388.281  10
   1   7  16 10801.5 367.981  17
   1  -7 -16 10316.0 371.412  12
   1   7  16 11310.9 308.514  22
  -1  -7  16 11052.0 373.866  23
   1   7  17 8261.17 318.407  17
   1  -7 -17 8656.12 325.350  12
  -1  -7  17 9090.66 331.771  23
   1   7  17 8765.19 345.884  10
  -1  -7  18 1141.32 124.066  23
   1  -7 -18 1234.81 114.409  12
   1   7  18 1177.01 134.576  10
   1   7  18 1134.70 119.330  17
   1  -7 -19 10502.1 363.888  12
  -1  -7  19 10229.0 372.020  23
   1   7  19 10225.9 369.803  17
   1   7  19 10218.0 391.027  10
   1   7  20 9535.42 373.914  10
   1   7  20 9673.79 350.535  17
  -1  -7  20 9068.61 349.803  23
   1   7  21 23347.7 696.975  10
  -1  -7  21 24205.8 674.710  23
   1   7  21 23305.7 670.677  17
   1  -7 -22 5127.68 239.214   9
  -1  -7  22 5236.09 243.636  23
   1   7  22 5136.61 242.868  17
   1   7  22 5236.10 262.299  10
   1  -7 -23 5617.17 239.060   9
   1   7  23 5629.10 251.118  17
   1   7  23 5695.70 272.273  10
  -1  -7  23 5487.70 251.244  23
   1   7  24 1415.74 138.829  10
   1   7  24 1531.48 128.580  17
  -1  -7  24 1295.22 126.105  23
   1  -7 -24 1388.14 104.912   9
   1  -7 -25 9592.96 321.405  24
  -1  -7  25 9333.27 329.115  23
   1   7  25 9482.52 348.122  10
   1  -7 -26 2342.99 129.479  24
  -1  -7  26 2164.67 139.731  23
   1   7  26 2116.88 147.934  10
   1   7  27 510.876 83.4299  10
   1   7  27 501.010 78.0478  23
   1  -7 -27 635.905 63.4683  24
  -1  -7  27 525.486 76.9757  23
   1   7  28 8640.45 275.839  23
   1   7  28 8156.84 280.088  10
  -1  -7  28 8913.66 271.772  23
   1   7  29 3591.36 149.147  10
  -1  -7  29 3809.51 141.975  23
   1   7  29 3648.47 145.790  23
  -1   8  29 3206.16 121.738  23
   1  -8  29 3029.64 123.790  23
  -1   8  28 6385.99 214.763  23
   1   8 -28 6418.13 206.875  21
   1  -8  28 6403.73 219.207  23
   1  -8  28 6578.22 207.819  15
   1  -8  27 861.392 86.7753  23
   1   8 -27 847.052 74.8675  21
  -1   8  27 804.000 84.2088  23
   1  -8  26 7932.09 283.903  23
   1   8 -26 8006.30 271.038  21
   1   8 -25 3202.84 162.813  21
   1  -8  25 3170.19 175.801  23
   1  -8  24 2370.54 159.876  23
   1   8 -24 2272.02 125.684  13
  -1   8  23 4996.93 227.330  17
  -1   8  23 4765.96 207.129  10
   1  -8  23 4985.23 239.914  23
   1   8 -23 4956.19 204.318  13
   1  -8  22 1523.48 144.888  23
  -1   8  22 1421.24 114.940  10
   1   8 -22 1344.15 108.853  13
  -1   8  22 1617.70 137.400  17
   1  -8  21 623.154 113.697  23
   1   8 -21 488.606 77.0691  13
  -1   8  21 550.372 82.7960  10
  -1   8  21 645.452 104.344  17
   1  -8  20 69.2073 47.2270  20
   1  -8  20 39.5232 88.9506  23
  -1   8  20 108.568 79.6932  17
   1   8 -20 98.7439 62.9643  13
  -1   8  20 43.5022 56.1088  10
   1  -8  19 12590.9 388.109  20
  -1   8  19 13508.3 425.708  10
   1   8 -19 12804.2 411.392  13
  -1   8  19 12344.1 428.244  17
   1  -8  19 14019.1 454.228  23
  -1   8  18 65248.2 1567.57  17
   1  -8  18 65893.0 1582.65  23
   1   8 -18 65444.2 1544.62  13
  -1   8  18 65858.0 1557.33  10
   1  -8  18 63943.2 1514.77  20
  -1   8  17 28799.0 784.162  17
   1  -8  17 29739.1 802.605  23
  -1   8  17 29183.3 777.924  10
   1   8 -17 28704.0 766.505  13
   1  -8  17 29485.7 745.854  20
  -1   8  16 31339.7 832.549  10
  -1   8  16 32026.3 836.796  17
   1   8 -16 32571.0 825.384  13
   1  -8  16 32772.8 855.072  23
   1  -8  16 30810.3 794.897  20
  -1   8  15 22303.2 636.381  10
   1  -8  15 22695.8 607.810  20
  -1   8  15 24834.1 652.612  17
   1   8 -15 22749.8 630.768  13
   1  -8  15 24233.9 663.930  23
   1   8 -15 23236.9 602.898   8
  -1   8  14 5249.31 225.759  17
   1  -8  14 4936.61 198.527  20
   1  -8  14 5068.76 235.979  23
   1   8 -14 5168.86 198.562   8
   1   8 -14 5192.07 217.049  13
  -1   8  14 4858.93 217.555  10
  -1   8  13 5216.51 225.082  17
  -1   8  13 5426.81 227.437  10
   1  -8  13 5742.80 246.128  23
   1   8 -13 5343.42 205.233   8
   1   8 -13 5610.99 223.071  13
   1  -8  13 5302.26 203.442  20
   1   8 -12 55334.3 1278.58   8
  -1   8  12 55021.1 1303.57  17
   1   8 -12 54475.8 1292.52  13
  -1   8  12 55467.5 1306.08  10
   1  -8  12 52877.3 1267.41  20
   1  -8  12 55653.3 1320.12  23
   1   8 -11 7732.19 256.614   8
   1  -8  11 7125.17 244.117  20
  -1   8  11 7819.39 272.060  17
   1  -8  11 7562.18 282.658  23
  -1   8  11 7430.06 269.070  10
   1   8 -11 7778.44 266.099  13
   1  -8  10 7831.80 276.828  23
   1   8 -10 7217.41 248.228   8
  -1   8  10 7512.33 265.134  10
   1   8 -10 7201.13 253.558  13
   1  -8  10 7151.79 238.513  20
   1   8  -9 16985.8 465.308  13
   1  -8   9 17230.2 484.983  23
  -1   8   9 17033.7 476.745  10
   1  -8   9 16878.4 448.376  20
   1   8  -9 16770.2 461.330   8
   1  -8   9 16917.3 559.860   2
   1  -8   8 19687.3 507.340  20
  -1   8   8 20964.3 564.937   5
  -1  -8  -8 20048.0 649.497   3
   1   8  -8 19520.9 522.912  13
   1  -8   8 19220.6 601.791   2
   1   8  -8 19761.7 523.931   8
   1   8  -8 20030.8 522.674  21
   1  -8   8 20643.0 546.785  23
  -1   8   8 19737.4 538.383  10
   1   8  -7 16000.1 434.919  13
   1   8  -7 15939.2 428.760  21
  -1   8   7 16235.4 449.149  10
   1  -8   7 15789.3 417.587  20
   1  -8   7 16126.5 453.328  23
  -1   8   7 15955.4 466.186   5
   1   8  -7 15875.8 435.069   8
  -1  -8  -7 15706.9 550.421   3
   1  -8   7 15475.5 496.764   2
   1  -8   6 4535.91 180.546  15
   1  -8   6 4690.25 190.211  23
  -1  -8  -6 4517.79 258.816   1
   1   8  -6 4328.33 171.279  13
   1  -8   6 4624.66 162.480  20
   1  -8   6 4320.59 205.638   2
  -1  -8  -6 4626.79 190.383  23
   1   8  -6 4323.09 166.559  21
  -1  -8  -6 4544.45 256.689   3
   1   8  -6 4449.48 175.167   8
   1  -8   5 7917.21 269.218  23
   1  -8   5 8323.02 292.096   2
   1  -8   5 7884.12 239.838  20
   1   8  -5 8303.38 257.073  13
   1   8  -5 7962.17 215.245  24
  -1  -8  -5 8284.43 368.164   1
  -1  -8  -5 7944.54 358.052   3
  -1  -8  -5 8636.76 275.481  23
   1   8  -5 8306.84 249.840  21
   1  -8   5 8078.21 264.353  15
  -1   8   5 8158.09 260.648  19
   1   8  -5 8429.58 262.513   8
   1  -8   4 22416.2 591.797   2
   1  -8   4 21683.3 573.560  23
   1   8  -4 21667.1 556.540  13
   1   8  -4 22320.4 516.082  24
   1  -8   4 21551.9 565.728  15
  -1  -8  -4 23089.8 581.313  23
  -1  -8  -4 22347.2 700.854   3
   1   8  -4 23177.2 584.403   5
   1  -8   4 21240.3 539.284  20
  -1   8   4 23125.7 565.162  19
   1   8  -4 21043.3 545.891  21
  -1  -8  -4 21905.2 698.091   1
   1   8  -4 22269.8 565.743   8
  -1   8   3 17123.0 506.440   4
   1  -8   3 15991.0 454.963  23
  -1  -8  -3 18228.3 471.524  23
   1   8  -3 17693.8 455.948   8
  -1  -8  -3 16192.9 573.982   1
   1  -8   3 16612.1 463.036   2
   1  -8   3 16460.8 450.380  15
  -1  -8  -3 16121.3 571.591   3
   1   8  -3 17377.2 406.810  24
  -1   8   3 16900.0 446.682  19
   1   8  -3 16431.7 439.812  13
   1   8  -3 16651.2 467.089   5
   1  -8   2 52292.8 1279.31   1
  -1   8   2 53647.6 1343.63   4
  -1  -8  -2 55104.3 1456.40   1
   1   8  -2 57636.1 1250.16  24
   1  -8   2 55642.4 1303.16   2
   1   8  -2 58119.2 1328.43   5
   1   8  -2 58104.7 1302.99   8
   1  -8   2 54971.9 1305.14  23
   1   8  -2 55631.4 1285.91  13
   1  -8   2 55725.5 1297.01  15
  -1  -8  -2 54158.8 1451.20   3
  -1   8   2 57429.9 1293.82  19
   1   8  -1 46979.7 1037.58  24
  -1   8   1 44494.8 1121.23   4
   1  -8   1 45170.0 1081.86  15
   1  -8   1 46646.4 1093.89  23
   1   8  -1 46922.5 1088.12   8
   1   8  -1 45578.7 1070.86  13
  -1   8   1 47529.7 1079.07  19
   1   8  -1 47241.2 1115.86   5
   1  -8   1 44521.2 1079.43   1
  -1  -8  -1 48937.8 1099.44  23
   1  -8   1 47141.8 1081.97   2
   1   8  -1 46398.2 1092.79  19
   1  -8   0 15491.8 422.886  23
   1  -8   0 14885.8 398.646   2
  -1   8   0 14624.8 437.669   4
   1  -8   0 14945.1 410.449  15
   1  -8   0 14676.0 416.485   1
   1   8   0 15770.5 371.572  24
   1   8   0 14607.6 398.051  13
   1   8   0 15221.5 419.897  19
   1   8   0 15488.2 443.860   5
   1   8   0 14154.0 515.909   4
  -1  -8   0 15851.4 420.078  23
  -1   8   0 15505.9 407.322  19
   1  -8  -1 46538.0 1096.80  23
   1  -8  -1 46729.3 1062.67   2
   1  -8  -1 45244.8 1080.00  15
   1  -8  -1 45224.4 1098.72   1
   1   8   1 45875.3 1221.43   4
   1   8   1 48335.0 1039.38  24
   1  -8  -1 45651.8 1054.77  20
  -1  -8   1 47028.2 1087.14  23
   1  -8  -1 44274.3 1097.95   3
  -1   8  -1 46662.7 1076.22  19
   1   8   1 46493.0 1068.49  13
  -1   8  -1 44089.7 1101.91   4
   1   8   1 47027.5 1091.80  19
   1   8   1 48847.9 1127.88   5
   1  -8  -2 56184.9 1262.50   2
   1  -8  -2 55604.9 1287.44  15
   1  -8  -2 56519.0 1318.88   1
   1   8   2 53166.8 1430.77   4
   1   8   2 59302.0 1342.65   5
  -1   8  -2 56334.5 1283.11  19
   1   8   2 55863.5 1297.07  19
  -1  -8   2 55552.3 1291.68  23
   1  -8  -2 60621.4 1318.20  23
   1   8   2 54339.1 1271.49  13
   1   8   2 58095.5 1245.34  24
   1  -8  -2 55626.7 1261.72  20
   1  -8  -2 53888.1 1293.36   3
  -1   8  -2 52849.8 1299.71   7
  -1   8  -3 15884.5 453.906   7
   1   8   3 16273.7 429.572  13
   1  -8  -3 15503.4 413.628   2
   1  -8  -3 15327.2 433.275   3
   1   8   3 18287.9 409.213  24
  -1   8  -3 16873.3 441.716  19
   1  -8  -3 16555.3 444.160  15
   1  -8  -3 18348.4 479.387  23
   1  -8  -3 16913.6 423.543  20
  -1  -8   3 16650.9 449.122  23
   1   8   3 16478.7 566.888   4
   1   8   3 18017.7 498.214   5
   1   8   3 16727.2 455.213  19
   1   8   4 24095.3 535.428  24
  -1  -8   4 21825.0 638.899   2
   1   8   4 22375.6 557.088  13
   1  -8  -4 21931.7 571.756  15
  -1   8  -4 21439.7 579.121   7
  -1  -8   4 22190.1 577.790  23
   1  -8  -4 23999.0 599.565  23
   1   8   4 22420.3 622.515   5
   1   8   4 21315.8 696.722   4
   1   8   4 22268.8 582.340  19
   1   8   5 8523.23 250.532  13
   1  -8  -5 8449.64 267.065  15
   1  -8  -5 9028.76 286.980  23
   1   8   5 8806.66 232.772  24
  -1   8  -5 8060.29 266.766   7
  -1  -8   5 8240.17 269.138  23
   1   8   5 8041.13 301.070   5
   1   8   5 8256.27 273.103  19
   1   8   5 7912.26 361.510   4
  -1  -8   5 8152.92 318.487   2
  -1  -8   6 4330.97 180.280  23
  -1   8  -6 4281.20 172.369   7
   1   8   6 4806.77 149.017  24
   1   8   6 4322.05 256.776   4
   1  -8  -6 4326.43 175.156  15
   1  -8  -6 4557.51 193.381  23
   1   8   6 4073.15 203.588   5
   1  -8  -6 4646.04 199.318  12
   1   8   6 4380.50 183.152  19
   1   8   6 4823.40 165.482  13
  -1  -8   6 4517.64 224.277   2
   1   8   7 15993.9 422.630  13
   1   8   7 15922.4 450.635  19
  -1   8  -7 16018.8 438.918   7
   1  -8  -7 16304.0 461.164  23
   1  -8  -7 16434.2 444.273  15
  -1  -8   7 16174.2 449.381  23
   1  -8  -7 16099.3 470.571  12
   1  -8  -8 20668.4 569.322  12
  -1  -8   8 20404.5 638.250   4
   1  -8  -8 20752.6 539.430  15
  -1  -8   8 20809.6 547.831  23
   1   8   8 20030.6 513.347  13
  -1   8  -8 19599.5 529.205   7
   1   8   9 17952.5 455.015  13
   1  -8  -9 17630.2 477.887  15
  -1  -8   9 16629.4 569.628   4
   1  -8  -9 16865.6 499.018  12
   1   8   9 17039.5 422.151  22
  -1  -8   9 17321.9 484.503  23
   1  -8 -10 7948.08 267.347  15
   1  -8 -10 7722.75 253.121  14
  -1  -8  10 7821.73 274.091  23
   1   8  10 7746.96 245.311  13
   1   8  10 7646.35 215.861  22
   1  -8 -10 7384.18 282.857  12
   1   8  10 6867.09 285.603  10
   1  -8 -11 7896.26 276.105  15
   1  -8 -11 7996.60 296.759  12
   1   8  11 7869.20 302.022  10
   1   8  11 8104.98 255.784  13
   1   8  11 7775.88 223.260  22
  -1  -8  11 7920.52 282.142  23
   1   8  12 55233.3 1346.18  10
   1   8  12 55365.9 1275.83  13
   1  -8 -12 55299.1 1304.36  15
   1   8  12 54582.0 1234.87  22
  -1  -8  12 55923.2 1318.64  23
   1  -8 -12 54277.5 1331.42  12
   1  -8 -13 5711.72 232.420  15
   1   8  13 5572.86 236.660  17
   1   8  13 5542.94 209.541  13
   1   8  13 5746.93 179.900  22
  -1  -8  13 5640.63 238.687  23
   1   8  13 5810.61 257.103  10
   1  -8 -13 5455.35 243.393  12
   1   8  14 5208.26 173.974  22
  -1  -8  14 5302.33 234.523  23
   1   8  14 5613.96 256.402  10
   1   8  14 5111.60 232.224  17
   1   8  14 5249.55 205.780  13
  -1  -8  15 23234.1 652.836  23
   1   8  15 23450.3 652.089  17
   1   8  15 23240.2 612.636  13
   1   8  15 23489.9 678.961  10
   1  -8 -15 22622.6 657.486  12
   1   8  15 23624.5 571.096  22
   1  -8 -16 31237.6 844.091  12
   1   8  16 32351.1 868.881  10
   1   8  16 32223.2 841.126  17
  -1  -8  16 31106.3 838.814  23
   1   8  17 30847.7 800.847  17
   1   8  17 29844.0 824.681  10
   1  -8 -17 27984.9 789.263  12
  -1  -8  17 29577.7 797.505  23
   1   8  18 64904.7 1593.20  10
   1   8  18 64750.0 1558.28  17
   1  -8 -18 63424.6 1549.75  12
  -1  -8  18 66061.8 1563.49  23
  -1  -8  19 12965.1 439.990  23
   1   8  19 12815.6 456.295  10
   1   8  19 13277.0 436.318  17
   1  -8 -19 13204.0 423.338  12
   1   8  20 73.3947 89.8230  17
  -1  -8  20 5.32317 80.4671  23
   1   8  20 212.322 98.6735  10
   1  -8 -20 27.9887 53.2233  12
   1   8  21 613.633 112.621  10
   1   8  21 459.154 101.280  17
  -1  -8  21 679.701 110.764  23
   1  -8 -22 1438.29 125.891   9
   1   8  22 1448.16 133.819  17
   1   8  22 1400.62 141.784  10
  -1  -8  22 1577.96 139.112  23
   1   8  23 4908.07 227.762  17
   1   8  23 4905.73 244.764  10
   1  -8 -23 4847.47 219.078   9
  -1  -8  23 5068.91 232.094  23
  -1  -8  24 2536.49 157.859  23
   1   8  24 2359.74 166.834  10
   1   8  24 2601.96 157.981  17
   1  -8 -24 2347.44 134.493   9
   1   8  25 3226.15 182.933  10
   1   8  25 3425.72 174.339  17
  -1  -8  25 3480.86 175.655  23
   1  -8 -25 3476.51 170.513  24
   1   8  26 7982.03 291.538  10
   1  -8 -26 8313.33 270.385  24
  -1  -8  27 913.948 82.8325  23
   1  -8 -27 836.412 69.2280  24
   1   8  27 814.147 85.4284  23
   1   8  27 948.337 90.2326  10
   1   8  28 6828.79 222.122  23
  -1  -8  28 6802.53 216.619  23
   1   8  28 6672.20 226.681  10
   1   8  29 2986.39 115.888  23
   1   8  29 2683.61 114.126  10
  -1   9  28 1949.92 95.3052  23
   1  -9  28 1978.17 99.0405  23
   1  -9  27 18185.1 475.768  23
  -1   9  27 18829.9 472.503  23
   1   9 -27 17569.5 451.482  21
   1  -9  27 17151.9 450.758  15
   1  -9  26 948.101 79.2989  15
   1   9 -26 1085.27 80.9475  21
   1  -9  26 1149.71 98.2062  23
   1   9 -25 344.081 60.0914  21
   1  -9  25 260.157 74.5934  23
   1   9 -24 3675.79 170.303  21
   1  -9  24 3598.86 187.350  23
   1  -9  23 20071.0 570.045  23
  -1   9  23 19353.6 552.292  17
   1   9 -23 18938.6 541.504  21
   1   9 -22 697.196 87.5828  21
   1  -9  22 715.993 109.779  23
  -1   9  22 893.461 110.413  17
  -1   9  21 10052.9 338.653  10
   1   9 -21 9472.48 317.903  13
  -1   9  21 10746.8 360.750  17
   1  -9  21 10168.9 371.796  23
   1   9 -21 9930.11 344.975  21
  -1   9  20 1043.45 121.527  17
   1   9 -20 1037.76 95.9991  13
   1  -9  20 839.749 125.420  23
  -1   9  20 941.476 97.5900  10
  -1   9  19 11821.7 388.258  10
   1   9 -19 11298.3 367.781  13
   1  -9  19 12008.0 422.258  23
  -1   9  19 11601.9 398.477  17
  -1   9  18 7887.13 303.409  17
  -1   9  18 7264.51 287.437  10
   1   9 -18 7124.05 271.948  13
   1  -9  18 7742.08 319.299  23
   1   9 -17 2265.16 139.159  13
   1  -9  17 2370.74 176.213  23
  -1   9  17 2352.71 152.565  10
  -1   9  17 2181.48 156.936  17
  -1   9  16 875.237 100.029  10
   1   9 -16 735.223 87.8756  13
  -1   9  16 1132.05 119.299  17
   1  -9  16 893.613 120.486  23
  -1   9  15 8759.35 321.400  17
   1  -9  15 8428.69 336.239  23
  -1   9  15 8878.42 319.328  10
   1   9 -15 8396.79 299.249  13
   1   9 -15 8346.44 279.930   8
  -1   9  14 897.815 97.3508  10
   1   9 -14 797.883 89.1115  13
   1  -9  14 677.780 117.029  23
   1   9 -14 662.409 74.2002   8
  -1   9  14 685.663 96.3855  17
   1   9 -13 64911.1 1540.32  13
   1   9 -13 66842.3 1549.77  21
  -1   9  13 66761.1 1564.68  10
   1  -9  13 67465.9 1583.00  23
  -1   9  13 64525.5 1561.44  17
   1   9 -13 66265.8 1530.15   8
  -1   9  12 7526.43 278.712  17
  -1   9  12 7301.33 275.059  10
   1   9 -12 7175.54 253.155   8
   1  -9  12 6949.41 286.546  23
   1   9 -12 6949.79 258.330  13
   1   9 -12 7334.08 264.042  21
   1  -9  11 22037.1 618.089  23
  -1   9  11 21686.5 599.101  17
   1   9 -11 22573.9 583.607   8
  -1   9  11 21474.8 600.925  10
   1   9 -11 21389.4 583.523  13
   1   9 -11 22027.2 586.843  21
   1   9 -10 6585.92 237.345   8
   1   9 -10 6321.91 234.707  21
   1  -9  10 6583.17 264.624  23
  -1   9  10 6365.20 250.969  10
   1   9 -10 6591.99 238.242  13
   1   9  -9 9850.26 315.601  21
   1  -9   9 10678.4 349.936  23
  -1   9   9 10345.5 338.024  10
   1   9  -9 10324.7 320.436  13
   1   9  -9 9932.67 320.482   8
   1  -9   8 38974.1 961.767  15
   1   9  -8 39013.2 942.445  21
   1   9  -8 38117.0 949.516   8
   1   9  -8 38716.1 945.166  13
   1  -9   8 40437.1 979.721  23
  -1   9   8 40825.8 974.812  10
   1   9  -7 60937.4 1373.21  21
   1   9  -7 58938.3 1375.73  13
   1   9  -7 58925.6 1385.20   8
   1  -9   7 58535.6 1393.03  15
  -1   9   7 60592.3 1405.57  10
   1  -9   7 59588.6 1408.65  23
   1  -9   6 8940.58 287.544  15
   1   9  -6 8633.45 281.136   8
   1   9  -6 8580.03 266.472  21
   1   9  -6 8643.59 271.630  13
   1   9  -6 7596.12 280.793   5
   1  -9   6 8524.66 295.244  23
  -1  -9  -6 8626.09 296.643  23
   1   9  -5 26918.8 718.690   5
   1   9  -5 28032.2 706.041   8
   1   9  -5 27546.9 682.276  21
   1   9  -5 28157.5 691.529  13
  -1   9   5 27430.2 791.107   4
  -1  -9  -5 28445.4 723.072  23
   1  -9   5 27418.8 706.120  15
  -1   9   5 28836.0 709.692  19
   1  -9   5 28306.3 721.149  23
  -1  -9  -4 25862.2 648.275  23
   1  -9   4 24437.0 627.123  15
   1   9  -4 24238.8 611.425  13
  -1  -9  -4 24392.2 776.883   3
   1   9  -4 24541.0 629.410   8
   1  -9   4 24443.9 640.458  23
  -1   9   4 25436.6 629.634  19
   1   9  -4 23979.3 647.281   5
  -1   9   4 22791.5 692.816   4
   1   9  -4 23889.6 565.436  24
   1   9  -3 25380.1 680.997   5
  -1   9   3 24222.2 714.942   4
   1   9  -3 25919.3 658.227   8
   1   9  -3 25846.4 596.852  24
  -1  -9  -3 27619.4 679.160  23
   1  -9   3 25504.7 653.632  15
   1   9  -3 25721.1 639.492  13
  -1  -9  -3 23911.1 795.875   3
   1  -9   3 26588.8 671.107  23
  -1   9   3 25479.7 651.705  19
  -1   9   2 632.098 70.3413  19
   1   9  -2 552.981 80.5837  19
  -1  -9  -2 555.169 103.077   1
  -1  -9  -2 615.309 108.116   3
   1  -9   2 515.313 51.8138  20
  -1  -9  -2 621.119 81.5695  23
   1   9  -2 647.760 45.7474  24
   1   9  -2 654.354 63.1977  13
   1  -9   2 570.872 77.1435  23
   1   9  -2 711.047 74.4673   8
   1   9  -2 593.029 72.7961   5
   1  -9   2 639.842 70.1736  15
  -1   9   1 91867.6 2044.16  19
   1  -9   1 89823.0 2045.40  15
   1  -9   1 90812.4 2063.41  23
   1  -9   1 89156.5 2010.95  20
   1   9  -1 84682.0 2052.74  19
   1   9  -1 91969.4 2092.49   5
   1   9  -1 93442.7 1990.78  24
   1   9  -1 89836.4 2052.90   8
   1   9  -1 90003.4 2027.75  13
  -1  -9  -1 88730.2 2233.32   1
   1   9   0 20117.8 689.381   4
   1   9   0 22494.8 511.480  24
   1   9   0 21187.0 542.746  13
  -1   9   0 21440.0 556.109  19
   1  -9   0 21174.5 557.418  15
  -1  -9   0 22390.7 577.059  23
   1   9   0 20843.9 569.431  19
   1  -9   0 21108.3 527.094  20
   1   9   0 22116.7 603.995   5
  -1  -9   0 20236.7 705.239   1
   1  -9   0 21537.2 576.646  23
  -1  -9   1 94139.5 2046.57  23
  -1   9  -1 82572.8 2038.74   7
   1   9   1 90683.0 2044.22  19
   1   9   1 84253.2 2193.00   4
   1  -9  -1 89417.1 1995.63  20
   1   9   1 89549.7 2009.95  13
   1  -9  -1 95482.5 2061.17  23
   1   9   1 91683.3 1977.80  24
   1  -9  -1 88716.8 2027.97  15
  -1   9  -1 92413.8 2028.91  19
   1   9   1 92070.5 2086.90   5
  -1   9  -2 531.879 65.7784  19
   1   9   2 494.942 73.2171  19
   1  -9  -2 634.112 54.9932  20
   1   9   2 677.567 50.1154  24
   1  -9  -2 625.902 69.4303  15
   1   9   2 604.639 60.4766  13
  -1  -9   2 670.834 77.2228  23
  -1   9  -2 465.487 59.6127   7
   1  -9  -2 581.789 84.6983  23
   1   9   2 575.552 104.827   4
  -1   9  -3 26817.4 664.296  19
  -1   9  -3 24215.5 665.512   7
   1  -9  -3 28384.1 704.576  23
   1   9   3 27546.5 619.922  24
   1   9   3 25367.7 640.904  13
   1  -9  -3 26209.6 662.966  15
   1   9   3 26312.1 677.243  19
  -1  -9   3 25754.1 672.029  23
   1   9   4 25439.0 594.169  24
   1  -9  -4 24519.7 636.641  15
   1  -9  -4 26171.4 669.282  23
   1   9   4 25330.3 654.689  19
  -1   9  -4 24581.4 637.200  19
   1   9   4 24563.5 617.876  13
  -1  -9   4 25615.9 651.756  23
  -1  -9   5 28745.4 724.930  23
   1   9   5 27790.4 689.585  13
   1  -9  -5 29041.3 740.941  23
   1   9   5 29031.2 730.767  19
   1  -9  -5 28172.6 712.267  15
   1  -9  -6 8788.62 284.680  15
   1   9   6 8559.48 261.290  13
  -1  -9   6 8645.72 292.980  23
   1  -9  -6 8743.86 312.379  12
   1  -9  -6 8773.52 304.901  23
   1   9   6 8674.84 295.896  19
   1  -9  -7 59667.0 1394.06  15
  -1  -9   7 59886.6 1408.33  23
   1  -9  -7 61483.0 1426.39  23
   1   9   7 60964.8 1369.36  13
   1   9   7 58150.9 1409.52  19
   1  -9  -7 59668.4 1434.85  12
  -1  -9   8 39586.3 976.865  23
   1  -9  -8 38867.6 997.352  12
   1   9   8 40207.3 935.498  13
   1  -9  -8 39324.4 961.883  15
   1  -9  -9 10961.4 367.282  12
   1   9   9 10695.1 312.567  13
   1   9   9 10074.2 367.545  10
  -1  -9   9 10635.2 346.474  23
   1  -9  -9 10443.4 334.135  15
   1   9  10 6709.76 227.710  13
   1  -9 -10 6470.74 247.008  15
  -1  -9  10 6671.78 259.608  23
   1   9  10 6646.16 280.146  10
   1  -9 -10 6507.98 270.188  12
   1  -9 -10 7017.03 241.989  14
   1   9  11 22221.4 566.143  13
   1  -9 -11 21120.8 587.990  15
   1   9  11 22456.6 637.120  10
  -1  -9  11 21690.8 603.858  23
   1  -9 -11 21174.7 619.442  12
   1  -9 -12 7119.96 268.995  15
   1   9  12 7594.68 250.270  13
   1   9  12 6840.33 295.492  10
  -1  -9  12 7240.30 282.564  23
   1  -9 -12 6853.50 287.819  12
   1   9  13 62879.9 1541.25  17
  -1  -9  13 64484.1 1543.41  23
   1  -9 -13 65512.3 1529.05  15
   1  -9 -13 62999.5 1559.54  12
   1   9  13 66349.5 1498.54  13
   1   9  13 65895.6 1578.74  10
   1  -9 -14 646.535 99.5458  12
   1   9  14 644.153 102.679  17
   1   9  14 638.007 83.1877  13
  -1  -9  14 662.395 98.0701  23
   1   9  14 656.598 108.555  10
   1   9  15 8780.89 326.777  17
   1   9  15 8149.79 338.688  10
   1  -9 -15 8225.53 323.567  12
  -1  -9  15 8619.46 323.987  23
   1   9  16 755.924 112.991  17
   1   9  16 718.091 119.122  10
  -1  -9  16 924.351 119.082  23
   1  -9 -16 738.327 101.813  12
   1   9  17 2186.20 161.501  17
   1   9  17 2249.16 176.867  10
  -1  -9  17 2336.02 165.745  23
   1  -9 -17 1992.48 146.773  12
  -1  -9  18 7709.04 307.814  23
   1  -9 -18 7249.19 291.318  12
   1   9  18 7181.79 302.545  17
   1   9  18 7771.00 330.456  10
   1   9  19 11469.3 423.880  10
   1   9  19 11669.5 406.543  17
   1  -9 -19 11599.2 386.184  12
  -1  -9  19 11587.4 401.461  23
   1  -9 -20 912.910 93.8271  12
   1   9  20 807.082 112.836  17
   1   9  20 1069.85 128.877  10
  -1  -9  20 917.061 116.122  23
   1   9  21 10134.6 381.477  10
   1   9  21 10000.5 363.383  17
  -1  -9  21 10643.2 370.447  23
   1  -9 -22 784.032 94.7520   9
  -1  -9  22 713.630 104.139  23
   1   9  22 778.536 113.050  10
   1   9  22 1021.83 119.907  17
  -1  -9  23 19530.2 555.728  23
   1   9  23 20029.2 558.821  17
   1   9  23 19180.2 574.774  10
   1  -9 -23 18873.6 547.322   9
  -1  -9  24 3601.44 181.342  23
   1   9  24 3902.53 196.033  10
   1  -9 -24 3305.07 157.699   9
   1   9  24 3574.77 179.838  17
   1  -9 -25 319.534 68.4517  24
   1   9  25 150.772 64.8433  17
  -1  -9  25 295.572 68.9409  23
   1   9  25 326.233 75.2968  10
   1   9  26 1129.51 98.3085  10
   1  -9 -26 1049.60 83.7409  24
  -1  -9  26 1054.46 89.5317  23
  -1  -9  27 18239.8 463.240  23
   1   9  27 17877.2 476.006  10
   1   9  27 18567.9 470.853  23
   1  -9 -27 17066.5 450.305  24
   1   9  28 1723.26 92.0902  10
   1   9  28 1973.37 94.3951  23
  -1  10  27 689.786 59.3657  23
   1 -10  27 704.296 64.0432  23
   1 -10  26 1205.35 89.9960  23
   1  10 -26 1071.14 64.6427  21
   1 -10  26 1121.65 69.3410  15
   1 -10  25 4556.59 168.198  15
   1  10 -25 4353.74 162.506  21
   1 -10  25 4594.18 190.502  23
   1 -10  24 6003.37 240.435  23
   1  10 -24 5952.31 211.069  21
   1 -10  24 6181.22 219.155  15
   1 -10  23 4093.19 180.622  15
   1  10 -23 4098.43 174.889  21
  -1  10  23 4055.40 187.740  17
   1 -10  23 4242.44 203.418  23
   1 -10  22 316.886 86.8532  23
   1 -10  22 379.510 76.3756  15
   1  10 -22 353.100 60.5505  21
  -1  10  22 476.824 86.2862  17
  -1  10  21 299.033 80.6551  17
   1 -10  21 375.031 101.509  23
   1  10 -21 302.183 66.6797  21
   1 -10  20 12503.9 414.880  23
   1  10 -20 11232.0 372.272  21
  -1  10  20 11604.3 374.386  10
  -1  10  20 11872.1 395.445  17
  -1  10  19 1976.43 149.100  17
   1 -10  19 2163.12 168.475  23
   1  10 -19 1893.75 132.653  21
  -1  10  19 2205.70 141.555  10
  -1  10  18 4056.53 209.942  17
   1  10 -18 3943.65 190.184  21
  -1  10  18 3764.15 190.733  10
  -1  10  17 9088.07 332.553  17
   1  10 -17 8557.44 311.420  21
  -1  10  17 8403.31 316.191  10
   1 -10  17 9060.89 350.383  23
   1  10 -16 18830.9 546.005  21
  -1  10  16 18497.4 554.996  10
  -1  10  16 19572.5 568.239  17
   1 -10  16 19740.1 590.983  23
   1  10 -16 19170.1 531.075  13
  -1  10  15 9079.72 337.542  17
   1  10 -15 8962.61 316.643  21
  -1  10  15 9329.74 333.682  10
   1 -10  15 9378.98 355.334  23
   1  10 -15 9130.63 308.430  13
   1 -10  14 15243.3 498.517  23
   1  10 -14 15667.8 453.617  13
  -1  10  14 14951.9 478.507  17
  -1  10  14 15996.8 481.707  10
   1  10 -14 15722.4 463.135  21
   1  10 -14 15634.4 446.329   8
   1  10 -13 6307.01 236.003   8
  -1  10  13 6000.47 258.106  17
  -1  10  13 6336.50 260.282  10
   1 -10  13 6268.17 276.552  23
   1  10 -13 5920.68 232.355  13
   1  10 -13 6101.61 241.110  21
   1 -10  12 10862.7 366.607  15
  -1  10  12 11526.9 373.688  17
   1  10 -12 11239.1 348.639   8
   1  10 -12 10317.2 343.908  21
   1 -10  12 10926.9 388.076  23
  -1  10  12 11245.3 371.981  10
   1  10 -12 10325.6 339.800  13
   1  10 -11 32907.4 833.997  13
   1  10 -11 35045.8 845.926   8
   1 -10  11 33673.7 881.832  23
   1 -10  11 32707.5 857.942  15
   1  10 -11 32525.5 834.874  21
  -1  10  11 34502.3 870.066  10
  -1  10  11 33215.2 860.626  17
   1  10 -10 10097.4 325.430   8
   1 -10  10 9666.88 334.476  15
   1  10 -10 10090.4 318.160  13
   1  10 -10 9455.56 313.114  21
   1 -10  10 10026.6 356.544  23
  -1  10  10 10186.2 344.547  10
   1 -10   9 28521.6 748.604  23
   1 -10   9 27376.0 722.495  15
   1  10  -9 27120.9 697.669  21
   1  10  -9 27713.3 700.322  13
   1  10  -9 26443.5 709.235   8
  -1  10   9 28382.3 737.124  10
   1 -10   8 1862.73 126.811  15
  -1  10   8 1821.35 130.313  10
   1 -10   8 2093.45 145.794  23
   1  10  -8 1695.54 117.897   8
   1  10  -8 1865.00 110.931  21
   1  10  -8 1710.05 108.376  13
   1  10  -7 8471.21 294.165   8
  -1  10   7 9053.28 312.892  10
   1  10  -7 8610.65 279.506  13
   1 -10   7 8491.69 295.668  15
   1 -10   7 8701.97 315.300  23
   1 -10   6 16854.1 488.103  23
   1  10  -6 15485.2 461.504   8
   1  10  -6 16144.7 445.258  13
   1 -10   6 16717.9 466.505  15
  -1 -10  -6 16036.8 483.743  23
   1  10  -5 4906.35 209.171   8
   1  10  -5 5269.09 196.214  13
   1 -10   5 5542.54 232.542  23
  -1 -10  -5 5352.32 228.049  23
   1 -10   5 5473.19 214.816  15
  -1  10   5 5305.85 214.617  19
   1  10  -4 9311.25 250.583  24
   1 -10   4 9459.06 327.152  23
   1 -10   4 9224.71 307.397  15
   1  10  -4 9592.86 316.393   8
  -1 -10  -4 9932.62 331.512  23
  -1  10   4 10265.0 318.278  19
   1  10  -4 9675.04 293.390  13
   1 -10   3 17540.3 491.135  15
   1  10  -3 17603.4 429.985  24
  -1 -10  -3 18270.7 517.747  23
   1 -10   3 18140.1 514.595  23
  -1  10   3 18171.0 495.228  19
   1  10  -3 17595.6 471.834  13
  -1 -10  -2 45588.2 1080.47  23
   1 -10   2 43386.3 1044.93  15
   1  10  -2 42419.0 980.730  24
   1  10  -2 42978.8 1022.97  13
   1 -10   2 43817.2 1069.70  23
  -1  10   2 45094.2 1049.43  19
   1  10  -1 4249.52 138.297  24
  -1  10   1 4297.35 181.729  19
   1 -10   1 4051.62 195.100  23
   1 -10   1 3810.90 174.116  15
   1  10  -1 4027.91 163.233  13
   1 -10   0 134179. 3050.48  15
   1  10   0 136438. 3029.06  13
   1 -10   0 139909. 3086.84  23
   1  10   0 136248. 2991.77  24
  -1  10   0 138263. 3054.74  19
  -1 -10   0 146964. 3093.23  23
   1 -10  -1 4103.70 178.319  15
  -1 -10   1 4361.91 199.719  23
   1 -10  -1 4441.81 208.952  23
   1  10   1 4117.66 162.422  13
  -1  10  -1 4273.53 181.675  19
   1  10   1 4527.31 146.070  24
   1 -10  -1 4219.79 154.423  20
   1  10   2 44904.3 1007.15  24
   1 -10  -2 42823.1 1056.51  15
  -1  10  -2 44423.8 1062.70  19
   1  10   2 42322.7 1032.61  13
  -1 -10   2 44271.3 1080.36  23
   1 -10  -3 18597.9 526.431  23
   1 -10  -3 17367.5 483.985  15
   1  10   3 16772.8 499.326  19
   1  10   3 17752.2 463.151  13
  -1 -10   3 17412.0 501.736  23
  -1  10  -3 17992.8 488.974  19
  -1  10  -4 9438.36 307.824  19
   1 -10  -4 9684.87 307.364  15
   1 -10  -4 9777.43 336.035  23
   1  10   4 9314.92 283.544  13
  -1 -10   4 9390.35 318.386  23
   1  10   4 9477.30 323.335  19
  -1  10  -5 5576.78 216.459  19
   1 -10  -5 5228.67 211.018  15
   1 -10  -5 5823.37 240.777  23
   1  10   5 5338.36 192.114  13
  -1 -10   5 5357.03 224.756  23
   1  10   5 5281.96 227.311  19
  -1  10  -6 16011.3 464.059  19
   1 -10  -6 16579.9 501.872  12
  -1 -10   6 15865.1 474.586  23
   1 -10  -6 16232.6 463.055  15
   1  10   6 16202.1 436.212  13
   1 -10  -6 16687.8 493.808  23
   1  10   6 16675.3 484.052  19
   1 -10  -7 8331.45 287.612  15
   1  10   7 8601.07 265.856  13
  -1 -10   7 8494.93 302.641  23
   1 -10  -7 8392.30 314.006  23
   1  10   7 7748.20 318.646  10
   1  10   7 8355.02 305.704  19
   1 -10  -7 8655.78 320.474  12
  -1 -10   8 1810.82 133.477  23
   1 -10  -8 1966.00 146.212  12
   1 -10  -8 1920.00 127.953  15
   1  10   8 1995.05 110.773  13
   1  10   8 1663.01 147.169  10
   1 -10  -9 27324.0 722.265  15
   1  10   9 28312.2 777.908  10
   1  10   9 28418.4 696.687  13
  -1 -10   9 27629.8 743.673  23
   1 -10  -9 28066.8 764.371  12
   1 -10 -10 9957.10 327.395  14
   1 -10 -10 10128.6 338.427  15
  -1 -10  10 10140.8 354.772  23
   1  10  10 10467.1 384.835  10
   1 -10 -10 10263.4 370.679  12
   1  10  10 10590.3 317.336  13
  -1 -10  11 32882.9 869.263  23
   1 -10 -11 33819.4 851.982  15
   1 -10 -11 32190.0 885.360  12
   1  10  11 33344.0 901.891  10
   1  10  11 34230.4 824.091  13
   1 -10 -12 10931.8 365.109  15
   1  10  12 10715.8 404.600  10
   1  10  12 11448.1 344.739  13
  -1 -10  12 11664.8 388.906  23
   1 -10 -12 11104.2 395.841  12
   1  10  13 6332.28 269.934  17
   1 -10 -13 6333.64 256.217  15
  -1 -10  13 6498.33 271.719  23
   1  10  13 5770.09 282.259  10
   1 -10 -13 5966.54 272.601  12
   1  10  13 6466.94 235.886  13
   1  10  14 15103.8 481.057  17
   1  10  14 15459.9 439.127  13
   1  10  14 15034.9 506.584  10
  -1 -10  14 15268.7 483.455  23
   1 -10 -14 14491.3 483.488  12
   1  10  15 9242.53 369.951  10
  -1 -10  15 9528.67 356.395  23
   1 -10 -15 9458.78 353.028  12
   1  10  15 9640.67 354.991  17
   1  10  16 18665.6 567.668  17
   1 -10 -16 17968.4 558.806  12
   1  10  16 18381.5 590.009  10
  -1 -10  16 19852.4 571.209  23
   1  10  17 8827.63 334.985  17
   1  10  17 8467.00 349.697  10
  -1 -10  17 8773.08 332.415  23
   1 -10 -17 8062.33 318.114  12
   1 -10 -18 3698.63 191.970  12
   1  10  18 4022.80 230.003  10
  -1 -10  18 3835.66 209.265  23
   1  10  18 3694.94 211.605  17
   1  10  19 1898.36 159.301  10
   1  10  19 2250.37 159.067  17
   1 -10 -19 1892.48 130.627  12
  -1 -10  19 1817.56 149.590  23
   1  10  20 11181.4 388.993  17
   1 -10 -20 11203.4 359.188  12
   1  10  20 11488.0 408.016  10
  -1 -10  20 11759.6 392.767  23
  -1 -10  21 385.015 93.1971  23
   1  10  21 388.280 90.6766  17
   1  10  21 215.085 83.6390  10
   1  10  22 420.667 96.3903  10
  -1 -10  22 357.365 81.8008  23
   1 -10 -22 290.751 66.6031   9
   1  10  22 356.767 85.4584  17
   1  10  23 3854.36 196.787  10
   1  10  23 3923.44 189.476  17
  -1 -10  23 4038.05 189.922  23
   1 -10 -23 3803.13 178.205   9
   1  10  24 6110.00 241.683  10
   1  10  24 6056.21 230.989  17
   1 -10 -24 6036.21 213.568   9
   1  10  25 4427.20 191.270  10
   1  10  25 4558.26 183.840  17
  -1 -10  25 4636.69 182.256  23
   1 -10 -25 4564.90 182.989  24
  -1 -10  26 1276.76 84.5297  23
   1  10  26 1268.83 88.4748  23
   1  10  26 1240.22 88.5073  10
   1 -10 -26 1137.59 80.1799  24
   1  10  27 835.614 64.1622  23
   1  10  27 669.836 59.5876  10
   1  11 -26 9548.30 274.997  19
   1 -11  26 10160.1 281.793  23
  -1  11  26 9694.45 273.956  23
   1 -11  25 1641.52 101.198  23
   1 -11  24 6480.42 230.285  23
   1 -11  24 5905.17 193.753  15
  -1  11  23 14891.5 420.199  17
   1 -11  23 14586.7 399.972  15
   1 -11  23 14738.8 434.020  23
  -1  11  22 1979.52 125.076  17
   1  11 -22 1706.77 99.2961  21
   1 -11  22 1584.61 128.416  23
   1 -11  22 1633.65 107.105  15
   1 -11  21 10148.1 318.413  15
   1  11 -21 9150.77 297.548  21
   1 -11  21 10047.5 348.773  23
  -1  11  21 9763.79 329.753  17
   1 -11  20 3037.91 159.871  15
   1 -11  20 3042.50 182.551  23
   1  11 -20 3045.79 149.711  21
  -1  11  20 3174.78 173.637  17
  -1  11  19 4066.65 201.426  17
   1 -11  19 4126.98 218.690  23
   1 -11  19 4052.93 190.257  15
   1  11 -19 3684.85 173.367  21
   1 -11  18 17415.0 508.580  15
  -1  11  18 17477.7 506.103  10
   1 -11  18 16862.9 539.477  23
   1  11 -18 16800.0 488.965  21
  -1  11  18 18488.4 530.399  17
  -1  11  17 2825.37 174.131  17
   1 -11  17 2950.04 194.338  23
   1 -11  17 2790.75 163.788  15
   1  11 -17 2669.23 147.289  21
  -1  11  17 2905.57 163.441  10
  -1  11  16 3875.30 206.000  17
  -1  11  16 3966.07 196.855  10
   1 -11  16 3798.96 193.741  15
   1 -11  16 3929.73 224.250  23
   1  11 -16 3698.11 178.411  21
   1 -11  15 20190.3 610.328  23
   1 -11  15 20173.3 579.476  15
  -1  11  15 20337.4 584.159  10
  -1  11  15 20659.3 593.319  17
   1  11 -15 19805.4 556.600  21
   1  11 -14 8430.77 297.191  21
   1 -11  14 9062.37 352.692  23
   1 -11  14 8631.16 318.379  15
  -1  11  14 8528.76 325.152  17
  -1  11  14 9068.53 327.397  10
  -1  11  13 8892.98 326.433  17
   1 -11  13 8627.26 315.906  15
  -1  11  13 8673.99 321.122  10
   1  11 -13 8378.59 293.305  21
   1 -11  13 8312.86 337.662  23
   1 -11  12 66330.2 1580.02  15
   1 -11  12 69293.8 1619.46  23
   1  11 -12 64693.9 1548.77  21
  -1  11  12 68367.5 1594.63  10
  -1  11  12 66507.2 1590.23  17
  -1  11  11 53690.7 1298.61  17
   1 -11  11 52379.0 1287.84  15
   1 -11  11 53811.1 1324.28  23
  -1  11  11 53525.5 1303.62  10
  -1  11  10 34693.1 889.943  10
   1 -11  10 33950.0 873.112  15
   1 -11  10 33643.8 903.184  23
  -1  11   9 7801.57 300.744  10
   1 -11   9 8016.79 319.991  23
   1 -11   9 7858.72 288.838  15
   1 -11   8 28399.6 733.730  15
   1  11  -8 27037.2 698.018  13
   1 -11   8 27464.2 758.684  23
  -1  11   8 28730.2 755.267  10
   1 -11   7 13633.0 423.103  15
  -1  11   7 14709.2 449.978  10
   1  11  -7 13738.7 398.032  13
   1 -11   7 14337.7 454.834  23
  -1 -11  -6 59956.9 1468.85  23
  -1  11   6 62535.7 1467.12  10
   1 -11   6 62206.7 1473.71  23
   1  11  -6 60266.5 1405.94  13
   1 -11   6 60728.4 1438.03  15
  -1 -11  -5 13787.7 440.068  23
   1 -11   5 13576.1 438.402  23
   1 -11   5 13810.1 413.764  15
   1  11  -5 13519.5 386.945  13
  -1 -11  -4 11129.0 377.827  23
   1 -11   4 10854.8 349.557  15
  -1  11   4 10919.5 357.613  19
   1  11  -4 10891.3 326.878  13
   1 -11   4 11320.1 380.307  23
   1 -11   3 14165.1 447.198  23
   1  11  -3 13474.4 351.458  24
  -1 -11  -3 15046.1 451.617  23
   1 -11   3 14144.4 417.319  15
   1  11  -3 13818.9 390.525  13
  -1  11   3 14431.9 425.978  19
  -1 -11  -2 15310.6 457.105  23
   1 -11   2 13932.9 415.420  15
   1 -11   2 13896.3 445.972  23
  -1  11   2 14348.8 424.071  19
   1  11  -2 13458.7 388.612  13
   1 -11   1 6469.71 242.722  15
  -1 -11  -1 7037.18 280.672  23
   1  11  -1 6145.00 218.406  13
  -1  11   1 6650.77 249.562  19
   1 -11   1 6847.40 276.377  23
   1 -11   0 50510.6 1255.10  15
  -1  11   0 53054.9 1268.16  19
   1  11   0 51596.7 1229.34  13
   1 -11   0 55398.5 1317.65  23
  -1  11  -1 7094.72 257.988  19
   1 -11  -1 6678.20 246.931  15
   1 -11  -1 7161.76 298.277  23
  -1 -11   1 7313.98 284.284  23
   1  11   1 6327.89 222.369  13
   1 -11  -2 15119.8 463.722  23
   1  11   2 13860.3 387.047  13
   1 -11  -2 13542.5 410.379  15
  -1 -11   2 14292.4 442.940  23
  -1  11  -2 14007.3 420.682  19
   1  11   3 14077.1 395.377  13
   1 -11  -3 14605.6 461.864  23
  -1  11  -3 15021.3 434.299  19
  -1 -11   3 14695.7 450.208  23
   1 -11  -3 14069.3 420.280  15
   1 -11  -4 10617.5 376.789  23
  -1 -11   4 10667.1 363.764  23
   1  11   4 10906.9 319.391  13
  -1  11  -4 10750.2 349.674  19
   1 -11  -4 11060.2 346.046  15
   1  11   5 13733.2 384.804  13
  -1 -11   5 13913.6 435.324  23
   1 -11  -5 13549.7 447.883  23
  -1  11  -5 13909.6 419.866  19
   1 -11  -5 13952.9 413.733  15
   1 -11  -5 13668.9 457.436  12
  -1  11  -6 61433.8 1459.73  19
   1  11   6 62443.9 1417.04  13
   1 -11  -6 61041.9 1447.68  15
   1 -11  -6 63970.6 1500.39  23
  -1 -11   6 60252.4 1474.41  23
   1 -11  -6 61971.8 1505.07  12
  -1  11  -7 13908.6 428.103  19
  -1 -11   7 14104.7 445.240  23
   1 -11  -7 13814.4 420.067  15
   1 -11  -7 14191.8 460.844  23
   1  11   7 14152.6 394.750  13
   1  11   7 14207.2 476.103  10
   1 -11  -7 14284.9 466.290  12
  -1  11  -8 28717.1 752.424  19
   1 -11  -8 27964.3 740.673  15
   1  11   8 29043.2 712.973  13
   1 -11  -8 27758.5 787.204  12
  -1 -11   8 29535.5 772.978  23
   1  11   8 28683.9 805.484  10
   1  11   9 7728.51 261.068  13
   1 -11  -9 8265.51 289.980  15
   1  11   9 7755.26 331.018  10
  -1 -11   9 7841.36 307.321  23
   1 -11  -9 7939.07 322.086  12
  -1  11  -9 8017.54 293.690  19
   1 -11 -10 34400.3 866.298  15
  -1 -11  10 34440.8 894.592  23
   1  11  10 34932.5 929.952  10
   1  11  10 34247.8 835.542  13
   1 -11 -10 33173.6 855.065  14
   1 -11 -10 32910.5 906.639  12
   1 -11 -11 53069.6 1331.62  12
   1 -11 -11 53119.6 1286.72  15
   1  11  11 53157.7 1347.06  10
   1  11  11 54253.7 1257.66  13
  -1 -11  11 53407.4 1314.45  23
   1 -11 -12 65278.4 1614.66  12
   1  11  12 66493.6 1541.41  13
   1  11  12 67107.5 1637.96  10
  -1 -11  12 68601.2 1604.67  23
   1 -11 -12 66177.0 1570.43  15
   1  11  13 8595.03 330.852  17
   1  11  13 8672.72 354.750  10
   1  11  13 8437.92 285.742  13
  -1 -11  13 8269.67 328.828  23
   1 -11 -13 8332.51 332.800  12
   1  11  14 9251.94 365.133  10
   1  11  14 8861.78 341.824  17
   1 -11 -14 8311.01 334.843  12
  -1 -11  14 8959.44 341.655  23
   1  11  15 19418.5 590.368  17
  -1 -11  15 20390.1 594.263  23
   1  11  15 19794.9 615.117  10
   1 -11 -15 19439.4 587.709  12
   1  11  16 3815.48 223.620  10
   1 -11 -16 3657.91 199.041  12
   1  11  16 3817.43 210.773  17
  -1 -11  16 3705.27 209.540  23
   1  11  17 2827.66 180.749  17
  -1 -11  17 2690.23 179.185  23
   1 -11 -17 2581.46 160.769  12
   1  11  17 3040.23 199.153  10
   1  11  18 17322.3 553.317  10
  -1 -11  18 18722.4 537.932  23
   1 -11 -18 16816.4 502.991  12
   1  11  18 16844.4 528.512  17
   1  11  19 4187.97 212.501  17
   1  11  19 4098.15 221.776  10
   1 -11 -19 3775.62 178.356  12
  -1 -11  19 3839.16 203.898  23
   1  11  20 3265.32 186.695  17
  -1 -11  20 3360.26 184.825  23
   1  11  20 3180.89 190.855  10
   1  11  21 9733.63 350.729  10
  -1 -11  21 9808.44 335.964  23
   1  11  21 9797.99 337.787  17
   1 -11 -22 1704.24 118.331   9
   1  11  22 1761.54 125.709  17
   1  11  22 1635.82 127.549  10
  -1 -11  22 1795.21 123.832  23
  -1 -11  23 14904.8 420.408  23
   1  11  23 14733.5 437.390  10
   1 -11 -23 13775.6 409.559   9
   1  11  23 14953.8 425.339  17
   1  11  24 6192.53 236.194  10
  -1 -11  24 6575.63 225.688  23
   1 -11 -24 6710.62 234.778  24
   1  11  24 6645.76 230.451  17
   1 -11 -25 1642.49 95.6391  24
  -1 -11  25 1542.00 90.7572  23
   1  11  25 1582.09 98.8500  10
   1  11  26 9787.10 264.929  23
   1 -11 -26 9360.48 260.548  24
   1 -12  25 2491.23 110.033  23
   1  12 -25 2505.12 106.158  19
   1  12 -24 8212.16 257.232  19
   1 -12  24 8708.20 263.439  23
   1 -12  23 21.8396 55.0799  23
   1  12 -23-9.06168 51.2126  19
  -1  12  22 9283.81 296.223  17
   1 -12  22 9967.69 316.077  23
   1 -12  21 5964.50 208.197  15
   1 -12  21 6160.81 247.384  23
  -1  12  21 6660.90 237.086  17
   1 -12  20 3571.30 187.357  23
   1 -12  20 3421.32 152.936  15
  -1  12  20 3387.85 170.685  17
  -1  12  19 4487.71 204.418  17
   1 -12  19 4350.82 218.004  23
   1 -12  19 4299.71 183.417  15
  -1  12  18 61.8088 68.5140  17
   1 -12  18 168.080 87.0652  23
   1 -12  18 115.691 56.4548  15
  -1  12  17 13560.0 426.962  17
   1 -12  17 12955.2 404.271  15
  -1  12  17 13514.5 410.543  10
   1 -12  17 13644.2 449.097  23
  -1  12  16 4490.52 219.606  17
   1 -12  16 4502.71 202.474  15
   1 -12  16 4646.80 239.357  23
  -1  12  16 4403.60 203.712  10
   1 -12  15 1104.86 104.976  15
  -1  12  15 1167.40 107.186  10
   1 -12  15 1244.54 138.482  23
  -1  12  15 894.353 108.678  17
  -1  12  14 12562.1 423.350  17
  -1  12  14 13225.8 423.961  10
   1 -12  14 13070.3 447.231  23
   1 -12  14 13202.8 412.969  15
  -1  12  13 10183.2 357.870  17
  -1  12  13 10142.5 352.569  10
   1 -12  13 9530.81 337.155  15
   1 -12  13 9866.70 376.416  23
   1 -12  12 2043.89 167.783  23
  -1  12  12 2015.71 144.133  10
  -1  12  12 2124.66 151.585  17
   1 -12  12 2357.80 146.295  15
  -1  12  11 43002.0 1102.87  10
   1 -12  11 43570.4 1086.58  15
   1 -12  11 45740.8 1136.33  23
  -1  12  11 44161.3 1105.83  17
   1 -12  10 53596.2 1300.58  23
  -1  12  10 51785.9 1272.28  10
   1 -12  10 50161.0 1246.43  15
  -1  12   9 5767.09 253.306  10
   1 -12   9 5930.79 239.928  15
   1 -12   9 6230.55 279.075  23
   1 -12   8 44028.2 1118.91  23
  -1  12   8 44139.5 1106.76  10
   1 -12   8 43054.0 1073.92  15
  -1  12   7 18316.3 555.762  10
   1 -12   7 18868.1 568.720  23
   1 -12   7 18477.2 529.269  15
   1 -12   6 21923.4 632.972  23
  -1  12   6 21805.2 624.589  10
   1 -12   6 20753.8 586.410  15
   1 -12   5 10989.0 384.294  23
   1 -12   5 10060.0 339.739  15
  -1 -12  -5 10296.5 377.238  23
   1 -12   4 5106.29 252.660  23
   1 -12   4 5117.90 216.249  15
  -1 -12  -4 5138.87 244.106  23
   1 -12   3 7597.11 279.757  15
  -1  12   3 7993.58 294.052  19
   1 -12   3 8233.14 322.692  23
  -1 -12  -3 8159.54 317.258  23
   1 -12   2 14090.4 454.464  23
   1 -12   2 12830.8 398.246  15
  -1 -12  -2 14123.6 446.812  23
  -1  12   2 12875.8 411.306  19
   1  12  -2 12616.5 367.323  13
  -1 -12  -1 10717.9 377.871  23
   1 -12   1 9781.65 328.735  15
   1  12  -1 9908.25 302.109  13
   1 -12   1 10988.7 391.739  23
  -1  12   1 10145.7 344.631  19
   1 -12   0 592.896 79.3372  15
  -1 -12   0 452.273 102.502  23
   1 -12   0 524.861 106.046  23
   1  12   0 422.092 57.4987  13
  -1  12   0 479.644 83.3154  19
   1 -12  -1 10052.1 332.846  15
   1  12   1 9864.98 303.911  13
  -1 -12   1 11075.5 390.471  23
   1 -12  -1 11422.3 395.138  23
  -1  12  -1 10154.6 345.088  19
   1 -12  -2 14073.4 454.551  23
  -1  12  -2 13218.1 412.970  19
   1  12   2 12807.1 368.434  13
  -1 -12   2 13922.2 455.272  23
   1 -12  -2 12662.8 395.667  15
   1 -12  -3 8216.01 325.507  23
  -1  12  -3 7928.25 291.876  19
  -1 -12   3 8185.65 320.998  23
   1 -12  -3 7813.87 280.033  15
   1  12   3 7824.34 254.399  13
  -1  12  -4 5362.49 231.273  19
   1 -12  -4 5386.71 222.153  15
   1 -12  -4 5706.01 266.065  23
   1  12   4 5584.37 200.881  13
  -1 -12   4 5817.55 257.897  23
   1 -12  -5 10496.6 340.348  15
  -1 -12   5 10699.3 377.238  23
   1  12   5 10213.5 310.695  13
   1 -12  -5 10148.1 380.777  23
  -1  12  -5 10837.1 355.334  19
   1 -12  -5 10016.2 385.762  12
   1  12   6 21644.5 561.647  13
  -1  12  -6 21989.2 610.296  19
   1 -12  -6 21913.5 594.809  15
   1 -12  -6 22158.2 644.504  23
  -1 -12   6 21505.1 628.617  23
   1 -12  -6 21732.2 648.816  12
  -1  12  -7 18508.6 539.545  19
   1  12   7 18047.4 589.679  10
   1  12   7 18535.3 497.188  13
   1 -12  -7 18447.9 526.231  15
  -1 -12   7 19596.1 566.613  23
   1 -12  -7 18943.2 583.439  12
  -1  12  -8 42685.9 1081.09  19
   1 -12  -8 43524.7 1068.16  15
   1  12   8 44146.5 1036.69  13
   1  12   8 43861.0 1147.90  10
   1 -12  -8 44111.9 1130.00  12
  -1 -12   8 43096.4 1105.42  23
  -1  12  -9 6277.68 252.982  19
   1 -12  -9 5468.10 235.010  14
   1  12   9 5906.75 217.838  13
   1 -12  -9 5700.84 236.535  15
   1 -12  -9 5847.15 275.366  12
  -1 -12   9 6043.13 268.622  23
   1  12   9 6017.52 288.532  10
   1  12  10 53089.6 1338.13  10
  -1  12 -10 51852.2 1276.26  19
  -1 -12  10 53211.4 1300.42  23
   1 -12 -10 52982.7 1263.50  15
   1 -12 -10 52126.7 1317.87  12
   1 -12 -10 50411.9 1255.30  14
   1  12  10 53935.5 1235.78  13
  -1  12 -11 43753.2 1096.92  19
   1  12  11 43735.0 1053.27  13
   1 -12 -11 43907.9 1083.37  15
  -1 -12  11 45429.6 1122.75  23
   1  12  11 43655.7 1152.34  10
   1 -12 -11 44101.7 1136.94  12
  -1  12 -12 2114.75 146.101  19
   1  12  12 2347.00 180.696  10
   1  12  12 2037.84 125.022  13
   1 -12 -12 2061.95 157.827  12
  -1 -12  12 1802.61 154.608  23
   1 -12 -13 9764.21 363.906  12
  -1 -12  13 10244.1 363.193  23
   1  12  13 9170.56 354.726  17
   1  12  13 9418.85 378.329  10
  -1  12 -13 9291.91 336.863  19
   1  12  14 12980.0 440.243  17
  -1 -12  14 13798.6 447.769  23
   1  12  14 13342.3 465.973  10
   1 -12 -14 13016.9 440.481  12
  -1  12 -14 13193.2 421.325  19
  -1  12 -15 1097.95 109.767  19
   1  12  15 995.632 127.391  10
   1 -12 -15 1055.74 111.539  12
   1  12  15 1191.94 129.575  17
  -1 -12  15 1062.18 127.830  23
  -1  12 -16 4295.65 204.559  19
   1  12  16 4701.21 246.339  10
  -1 -12  16 4461.68 223.305  23
   1 -12 -16 4291.04 209.210  12
   1  12  16 4651.70 230.631  17
   1  12  17 13578.6 439.303  17
  -1  12 -17 13472.9 414.013  19
  -1 -12  17 13440.3 435.763  23
   1 -12 -17 12857.9 410.920  12
   1  12  17 13853.5 460.745  10
   1  12  18 60.7213 76.5428  10
   1  12  18 61.8369 77.2025  17
  -1 -12  18 140.555 73.8264  23
  -1  12 -18 97.4406 58.9442  19
  -1 -12  19 4328.97 206.680  23
   1  12  19 4476.96 210.797  17
   1  12  19 4523.24 223.114  10
  -1  12 -19 4121.26 184.293  19
  -1  12 -20 3431.38 157.030  19
  -1 -12  20 3584.87 178.993  23
   1  12  20 3489.65 179.141  17
   1  12  20 3314.44 184.427  10
  -1 -12  21 6684.24 243.284  23
   1  12  21 6330.19 253.386  10
   1  12  21 6395.42 245.667  17
  -1  12 -21 6102.07 215.319  19
   1  12  22 9741.40 308.984  17
   1 -12 -22 9422.78 306.597   9
  -1 -12  22 9779.40 304.589  23
   1  12  22 9716.61 320.237  10
   1 -12 -23-2.58220 29.4546   9
   1  12  23-11.6176 49.1134  17
   1 -12 -23-9.49463 48.3092  24
   1  12  23 38.6534 50.2726  10
  -1 -12  23 21.5590 44.5956  23
   1  12  24 8082.24 255.053  10
   1  12  24 8297.30 253.313  17
   1 -12 -24 8524.87 258.326  24
  -1 -12  24 8272.01 244.576  23
   1  12  25 2597.29 105.222  23
   1 -12 -25 2738.74 110.366  24
   1  13 -23 4658.88 165.929  19
   1 -13  23 4776.71 172.107  23
  -1  13  22 107.048 41.5175  17
   1  13 -22 120.896 52.6212  19
   1 -13  22 78.0541 56.2664  23
   1 -13  21 46.9330 61.8693  23
   1  13 -21 61.0973 60.1333  19
  -1  13  21 84.1766 44.7096  17
   1  13 -20 1737.56 122.047  19
  -1  13  20 1645.56 106.760  17
   1 -13  20 1736.42 124.708  23
   1  13 -19 902.920 101.787  19
  -1  13  19 835.036 88.6390  17
   1 -13  19 873.224 104.551  23
   1 -13  18 3904.40 201.771  23
  -1  13  18 4029.38 185.906  17
   1  13 -18 3980.76 201.755  19
  -1  13  17 26770.1 702.924  17
   1  13 -17 26529.8 722.564  19
   1 -13  17 26479.2 724.272  23
   1  13 -16 284.738 90.1310  19
  -1  13  16 446.538 83.2205  17
   1 -13  16 294.052 60.7538  15
   1 -13  16 224.880 89.3744  23
  -1  13  15 99.4755 71.9001  17
  -1  13  15 127.137 58.2103  10
   1  13 -15 73.0467 83.9468  19
   1 -13  15 112.331 95.3668  23
   1 -13  15 64.9505 52.3651  15
   1  13 -14 7160.11 301.380  19
   1 -13  14 6660.39 296.053  23
  -1  13  14 6945.84 267.540  10
   1 -13  14 7079.59 257.515  15
  -1  13  14 7252.97 280.915  17
   1  13 -13 1016.22 129.903  19
   1 -13  13 1099.84 98.5506  15
   1 -13  13 1000.26 131.362  23
  -1  13  13 1095.24 114.761  17
  -1  13  13 1184.26 109.723  10
   1  13 -12 11492.4 421.603  19
  -1  13  12 12255.2 402.086  17
   1 -13  12 11327.6 423.942  23
  -1  13  12 12249.5 396.558  10
   1 -13  12 11988.2 375.381  15
   1  13 -11 1473.96 150.011  19
  -1  13  11 1502.84 132.046  17
  -1  13  11 1745.20 132.929  10
   1 -13  11 1659.94 120.040  15
   1 -13  11 1552.39 155.804  23
  -1  13  10 31457.6 839.751  17
   1 -13  10 31139.1 813.250  15
   1 -13  10 33271.9 877.365  23
   1  13 -10 32407.4 866.733  19
  -1  13  10 31673.0 842.615  10
  -1  13   9 9922.11 356.919  10
   1 -13   9 10018.9 379.526  23
   1  13  -9 9486.48 369.741  19
   1 -13   9 9936.79 331.967  15
   1 -13   8 16573.1 488.127  15
   1 -13   8 17737.5 548.891  23
   1  13  -8 16904.7 534.433  19
  -1  13   8 16948.3 522.962  10
   1 -13   7 6025.60 240.429  15
   1  13  -7 5711.11 277.066  19
   1 -13   7 6554.04 292.399  23
  -1  13   7 6160.42 268.711  10
   1  13  -6 28190.5 822.481  19
   1 -13   6 30014.0 781.335  15
   1 -13   6 32854.4 854.379  23
  -1  13   6 31167.2 829.294  10
  -1  13   5 4244.37 220.528  10
   1 -13   5 4195.44 233.699  23
  -1 -13  -5 4064.45 196.387  12
   1 -13   5 4173.56 191.531  15
   1 -13   4 7807.61 324.789  23
   1 -13   4 7092.33 264.733  15
  -1 -13  -4 6837.92 303.804  23
  -1 -13  -3 24465.8 700.490  23
   1 -13   3 24110.0 648.594  15
   1 -13   3 25010.4 724.963  23
   1 -13   2 18143.9 526.057  15
  -1  13   2 18433.3 551.218  19
  -1 -13  -2 19040.2 579.860  23
  -1  13   1 29620.9 786.816  19
   1 -13   1 28328.7 758.217  15
  -1 -13  -1 29286.4 814.523  23
  -1 -13   0 20105.2 606.832  23
   1 -13   0 19844.0 552.417  15
   1 -13   0 20763.3 626.381  23
  -1  13   0 20057.8 577.156  19
  -1  13  -1 28891.4 783.139  19
   1 -13  -1 28960.5 760.511  15
   1 -13  -1 30386.2 832.950  23
   1  13   2 18582.6 496.183  13
   1 -13  -2 18398.0 529.552  15
   1 -13  -2 20044.3 598.942  23
  -1  13  -2 19252.2 556.087  19
   1 -13  -3 23027.9 645.009  15
   1 -13  -3 24962.4 718.821  23
   1  13   3 24115.3 614.383  13
  -1  13  -3 24609.6 675.441  19
  -1  13  -4 6960.22 274.590  19
   1 -13  -4 7055.69 259.826  15
   1 -13  -4 6627.35 304.851  23
   1  13   4 7014.18 232.580  13
   1 -13  -4 7282.12 319.224  12
  -1  13  -5 3871.42 198.295  19
   1 -13  -5 3936.41 185.099  15
   1 -13  -5 4225.62 237.393  23
  -1 -13   5 4267.79 228.834  23
   1 -13  -5 4158.64 233.830  12
   1  13   5 3920.05 162.053  13
   1 -13  -6 30853.1 801.619  15
  -1 -13   6 32963.1 863.467  23
   1  13   6 30720.8 768.722  13
   1 -13  -6 32374.0 879.142  12
   1  13   6 31905.2 888.113  10
  -1  13  -6 31813.8 828.102  19
  -1 -13   7 6258.98 279.961  23
   1 -13  -7 6057.57 240.089  15
  -1  13  -7 5725.87 248.709  19
   1  13   7 6104.77 216.548  13
   1  13   7 6548.78 305.233  10
   1 -13  -7 6124.77 284.830  12
  -1  13  -8 16990.0 509.827  19
   1 -13  -8 16612.6 488.635  15
  -1 -13   8 17823.9 543.131  23
   1  13   8 16922.9 464.144  13
   1 -13  -8 17527.3 553.725  12
   1  13   8 17480.0 570.760  10
   1 -13  -9 9649.28 324.526  15
   1  13   9 9873.25 390.297  10
   1 -13  -9 9353.70 368.560  12
  -1 -13   9 10179.1 367.501  23
   1  13   9 9420.41 299.071  13
   1 -13  -9 9456.45 331.440  14
  -1  13  -9 9693.88 341.004  19
  -1  13 -10 32351.5 826.105  19
   1 -13 -10 31806.2 806.170  15
   1  13  10 31149.4 777.360  13
  -1 -13  10 32095.0 853.979  23
   1 -13 -10 29146.2 794.860  14
   1 -13 -10 32088.0 869.330  12
   1  13  10 33279.0 891.803  10
  -1  13 -11 1671.40 132.600  19
  -1 -13  11 1679.79 147.375  23
   1  13  11 1684.42 110.051  13
   1  13  11 1701.19 164.091  10
   1 -13 -11 1706.08 145.510  12
  -1  13 -12 12014.2 389.697  19
  -1 -13  12 12594.3 419.598  23
   1 -13 -12 12373.3 420.246  12
   1 -13 -13 963.919 111.252  12
  -1 -13  13 1024.13 122.956  23
   1  13  13 1089.11 136.853  10
  -1  13 -13 941.634 102.464  19
   1 -13 -14 7162.21 287.139  12
  -1 -13  14 7060.75 292.751  23
   1  13  14 7108.00 310.136  10
  -1  13 -14 7250.77 271.802  19
   1 -13 -15 41.6825 54.0751  12
  -1  13 -15 53.0961 60.9382  19
   1  13  15 104.803 81.9899  10
  -1 -13  15 272.226 91.1364  23
   1 -13 -16 276.917 66.5806  12
  -1 -13  16 292.900 84.4406  23
   1  13  16 335.075 92.5599  17
   1  13  16 393.924 103.687  10
  -1  13 -16 253.739 66.8360  19
  -1  13 -17 25672.2 666.581  19
  -1 -13  17 26938.1 700.752  23
   1  13  17 24710.6 692.074  17
   1  13  17 25826.2 717.709  10
   1  13  18 3888.53 194.051  17
   1  13  18 4087.96 206.529  10
  -1  13 -18 4169.59 174.010  19
  -1 -13  18 3942.93 191.868  23
   1  13  19 879.277 103.798  10
  -1 -13  19 792.523 92.1116  23
   1  13  19 827.078 95.7096  17
  -1  13 -19 853.527 78.0536  19
   1  13  20 1811.21 120.702  17
   1  13  20 1752.59 124.156  10
  -1 -13  20 1832.31 118.405  23
   1 -13 -21 67.2148 42.1873   9
   1  13  21 74.9926 55.7200  17
   1  13  21 117.523 59.0876  10
  -1 -13  21 58.4040 51.4536  23
   1  13  22 88.5500 51.0667  17
   1 -13 -22 82.9280 33.7969   9
   1  13  22 98.9500 46.5817  10
  -1 -13  22 129.015 47.9508  23
   1  13  23 4546.38 164.516  17
  -1 -13  23 4693.94 156.399  23
   1  13  23 4531.50 163.847  10
   1 -13 -23 4772.48 170.141  24
   1 -14  22 9923.87 276.217  23
   1  14 -22 9448.31 266.047  19
   1  14 -21 13659.5 373.739  19
   1 -14  21 14181.4 383.223  23
  -1  14  20 397.975 53.3197  17
   1 -14  20 375.256 65.8296  23
   1  14 -20 512.860 67.9081  19
   1  14 -19 642.123 77.4047  19
   1 -14  19 688.638 85.5982  23
  -1  14  19 622.057 67.8175  17
  -1  14  18 1280.67 95.4020  17
   1  14 -18 1117.13 104.515  19
   1 -14  18 1270.58 110.909  23
   1  14 -17 721.697 95.7495  19
  -1  14  17 835.925 83.6603  17
   1 -14  17 841.740 105.828  23
   1 -14  16 15444.4 471.829  23
   1  14 -16 15635.0 467.532  19
  -1  14  16 15412.1 446.132  17
   1  14 -15 14349.1 439.681  19
   1 -14  15 13929.5 439.682  23
  -1  14  14 5561.40 232.982  17
   1 -14  14 5902.12 262.320  23
   1  14 -14 5684.36 253.053  19
  -1  14  13 4395.46 196.235  10
   1 -14  13 4609.96 232.614  23
   1  14 -13 4405.20 224.217  19
  -1  14  13 4690.42 211.030  17
   1  14 -12 1610.65 140.434  19
  -1  14  12 1745.55 132.159  17
   1 -14  12 1613.93 148.259  23
  -1  14  12 1538.91 117.288  10
   1  14 -11 8540.75 337.284  19
   1 -14  11 8655.51 344.509  23
  -1  14  11 8797.79 316.151  17
  -1  14  11 8775.47 313.936  10
   1  14 -10 15595.3 503.516  19
  -1  14  10 15324.2 477.113  17
   1 -14  10 16208.5 515.440  23
  -1  14  10 15966.6 481.643  10
  -1  14   9 11579.4 391.647  17
   1  14  -9 11975.0 420.853  19
   1 -14   9 12108.5 430.170  23
  -1  14   9 12119.6 400.882  10
   1 -14   8 4921.54 258.924  23
  -1  14   8 4586.74 223.340  10
   1  14  -8 4711.70 241.774  19
  -1  14   7 14041.4 458.718  10
   1 -14   7 14374.2 491.225  23
   1  14  -7 14218.3 474.944  19
   1 -14   6 26741.4 757.122  23
  -1  14   6 25204.3 717.298  10
   1  14  -6 25325.9 730.536  19
   1  14  -5 18343.9 573.363  19
  -1  14   5 18144.6 566.373  10
  -1  14   4 17475.3 538.957  10
   1  14  -4 16661.6 542.726  19
  -1 -14  -4 16265.2 505.615  12
  -1 -14  -3 27590.6 772.761  23
   1  14  -3 26111.6 763.379  19
  -1 -14  -2 18256.6 580.824  23
   1  14  -2 17326.4 567.195  19
  -1  14   1 4309.08 211.044  19
   1 -14   1 4161.97 185.065  15
   1 -14   1 4770.50 255.340  23
  -1 -14  -1 4112.30 231.694  23
  -1 -14   0 45453.0 1123.38  23
   1 -14   0 41491.8 1038.45  15
  -1  14   0 43026.8 1078.01  19
   1 -14   0 43861.9 1133.90  23
   1 -14  -1 4543.36 251.607  23
   1 -14  -1 4206.26 188.624  15
  -1  14  -1 4805.10 219.701  19
  -1 -14   1 4633.99 245.048  23
   1 -14  -2 18807.1 529.775  15
  -1 -14   2 20569.7 610.618  23
  -1  14  -2 19795.8 566.548  19
   1 -14  -2 19334.8 606.246  23
  -1  14  -3 26986.5 734.255  19
   1 -14  -3 26840.5 703.359  15
   1 -14  -3 27184.0 780.613  23
   1 -14  -3 27121.5 789.316  12
  -1 -14   3 29618.4 791.004  23
   1 -14  -4 17439.9 494.113  15
   1 -14  -4 17094.0 572.071  12
   1 -14  -4 16851.7 560.999  23
  -1  14  -4 18224.1 527.523  19
   1 -14  -5 18404.9 515.505  15
   1  14   5 18893.5 606.773  10
  -1  14  -5 18721.3 545.083  19
   1 -14  -5 17263.8 584.472  12
   1 -14  -6 25134.6 660.133  15
  -1  14  -6 25226.3 690.037  19
   1  14   6 25273.6 754.436  10
   1  14   6 24194.8 627.739  13
   1 -14  -6 25403.5 738.705  12
   1 -14  -7 14468.9 483.738  12
   1  14   7 13656.0 383.009  13
   1 -14  -7 13296.7 405.944  15
  -1 -14   7 14436.3 479.600  23
  -1  14  -7 13916.7 435.765  19
   1  14   7 14100.3 493.781  10
   1 -14  -8 4414.17 206.838  14
   1 -14  -8 4658.26 195.384  15
   1  14   8 4375.62 172.665  13
  -1 -14   8 4909.26 249.849  23
   1  14   8 4500.18 252.375  10
  -1  14  -8 4749.26 214.391  19
   1 -14  -8 4468.53 235.328  12
   1  14   9 12004.6 440.441  10
  -1 -14   9 12772.5 423.975  23
   1 -14  -9 11776.7 363.966  15
   1  14   9 11721.3 342.198  13
   1 -14  -9 11681.5 375.012  14
   1 -14  -9 11459.9 418.810  12
  -1  14  -9 12116.6 388.082  19
   1 -14 -10 15081.3 498.215  12
  -1 -14  10 16235.9 504.541  23
   1  14  10 15368.2 520.155  10
  -1  14 -10 15663.5 467.989  19
   1  14  11 8983.34 355.332  10
  -1 -14  11 8893.71 337.079  23
   1 -14 -11 8188.96 328.307  12
  -1  14 -11 8718.77 308.255  19
  -1 -14  12 1635.81 144.352  23
   1  14  12 1746.31 155.638  10
   1 -14 -12 1618.38 131.865  12
  -1  14 -12 1605.83 120.552  19
   1  14  13 4254.06 229.948  10
   1 -14 -13 4271.41 209.054  12
  -1 -14  13 4537.87 221.467  23
  -1  14 -13 4765.08 201.902  19
   1  14  14 5239.16 251.918  10
  -1  14 -14 5184.39 213.068  19
  -1 -14  14 5593.83 241.453  23
   1 -14 -14 5241.58 225.239  12
  -1  14 -15 14278.7 405.202  19
   1  14  15 14033.0 451.689  10
  -1 -14  15 14399.5 437.097  23
   1 -14 -15 12925.2 406.483  12
  -1 -14  16 15581.5 463.820  23
   1  14  16 15722.0 481.104  10
  -1  14 -16 15548.3 431.144  19
  -1  14 -17 783.372 71.3567  19
  -1 -14  17 678.073 89.5410  23
   1  14  17 853.397 101.028  10
  -1 -14  18 1249.30 101.685  23
   1  14  18 1237.46 105.884  10
   1  14  19 595.545 76.1586  17
  -1 -14  19 614.064 73.3815  23
   1  14  19 628.173 78.2566  10
  -1 -14  20 328.461 55.8918  23
   1  14  20 354.897 61.5691  10
   1  14  20 420.144 62.8752  17
   1 -14 -21 12384.7 353.838   9
   1  14  21 13424.1 359.722  17
   1  14  21 13256.9 361.449  10
  -1 -14  21 13902.1 355.263  23
   1 -14 -21 12986.2 363.668  24
   1  14  22 9037.97 254.127  17
   1 -15  20 11257.8 309.219  23
   1  15 -20 10643.3 294.151  19
   1 -15  19 2694.03 128.091  23
   1  15 -19 2326.53 113.234  19
  -1  15  18 3890.97 144.414  17
   1 -15  18 3967.13 169.634  23
   1  15 -18 3995.82 162.711  19
  -1  15  17 1035.20 78.7406  17
   1 -15  17 1094.35 100.639  23
   1  15 -17 1097.92 91.8651  19
  -1  15  16 668.450 71.8568  17
   1 -15  16 689.534 93.4403  23
   1  15 -16 704.899 83.0221  19
  -1  15  15 2501.94 130.604  17
   1  15 -15 2328.47 143.870  19
   1 -15  15 2489.51 154.864  23
   1  15 -14 239.080 78.9870  19
  -1  15  14 371.773 69.1237  17
   1 -15  14 295.977 90.0311  23
   1 -15  13 4517.74 223.375  23
  -1  15  13 4420.36 191.417  17
   1  15 -13 4619.76 213.328  19
  -1  15  12 10107.6 333.923  17
   1 -15  12 10785.6 373.892  23
   1  15 -12 10322.7 358.319  19
   1  15 -11 548.401 100.411  19
   1 -15  11 641.042 116.468  23
  -1  15  11 662.150 87.9047  17
  -1  15  10 1059.82 102.986  17
   1 -15  10 1263.79 137.992  23
  -1  15  10 1036.48 97.5541  10
   1  15 -10 984.875 125.514  19
  -1  15   9 239.221 71.4741  17
   1 -15   9 181.739 97.4290  23
   1  15  -9 301.369 92.0656  19
  -1  15   9 267.417 67.9437  10
   1  15  -8 7588.44 308.745  19
  -1  15   8 7639.48 286.799  17
  -1  15   8 7537.48 287.681  10
   1 -15   8 8185.84 339.645  23
   1 -15   7 9826.23 380.458  23
   1  15  -7 8809.82 346.109  19
  -1  15   7 9103.98 331.145  10
  -1  15   6 13144.0 440.965  10
   1  15  -6 13897.5 465.339  19
   1  15  -5 330.881 98.0867  19
   1 -15   5 443.071 119.623  23
  -1  15   5 286.805 79.7501  10
  -1  15   4 5375.19 249.063  10
   1 -15   4 5609.16 282.288  23
   1  15  -4 5480.82 258.677  19
  -1  15   3 7280.98 298.707  10
   1  15  -3 7813.99 312.911  19
   1 -15   3 7764.71 330.032  23
  -1 -15  -3 6765.15 272.729  12
   1 -15   2 1975.73 176.055  23
  -1 -15  -2 2105.14 161.012  23
   1  15  -2 1915.58 161.575  19
   1 -15   1 2878.86 202.727  23
   1  15  -1 2739.59 194.218  19
  -1 -15  -1 3117.26 196.265  23
   1  15   0 545.055 114.609  19
   1 -15   0 583.641 123.739  23
  -1 -15   0 636.715 115.581  23
  -1 -15   1 3134.23 194.883  23
   1 -15  -1 2902.86 204.476  23
   1 -15  -1 3135.63 209.144  12
   1  15   1 2750.74 194.382  19
  -1  15  -1 3140.04 173.808  19
  -1 -15   2 2074.75 164.731  23
   1 -15  -2 1850.97 169.962  23
   1  15   2 1775.02 163.882  19
  -1  15  -2 2021.47 140.975  19
   1 -15  -2 2167.21 173.791  12
  -1  15  -3 7734.93 289.883  19
   1 -15  -3 7495.67 325.897  23
  -1 -15   3 8072.60 323.204  23
   1  15   3 7784.86 341.987  10
   1 -15  -3 7294.63 325.126  12
  -1 -15   4 6058.26 275.513  23
   1  15   4 5938.81 288.914  10
   1 -15  -4 5567.97 274.747  12
  -1  15  -4 5831.72 241.819  19
   1 -15  -5 288.682 90.9468  12
   1  15   5 289.831 101.454  10
  -1 -15   5 342.147 103.373  23
  -1  15  -5 401.140 76.9405  19
   1 -15  -6 13448.1 469.805  12
   1  15   6 13997.5 488.790  10
  -1  15  -6 13652.4 429.919  19
   1 -15  -7 9058.92 352.967  12
   1  15   7 9264.93 373.264  10
   1 -15  -7 8995.56 321.519  14
  -1  15  -7 9320.00 321.571  19
   1 -15  -8 7013.56 265.656  14
   1 -15  -8 7348.16 305.870  12
  -1  15  -8 7558.82 276.480  19
   1  15   8 7209.83 318.635  10
  -1  15  -9 307.679 67.9097  19
  -1 -15   9 415.535 108.667  23
   1 -15  -9 292.752 82.8262  12
   1  15   9 279.236 93.5386  10
  -1 -15  10 1025.03 123.678  23
   1 -15 -10 1058.48 111.501  12
   1  15  10 1112.06 125.853  10
  -1  15 -10 958.655 95.0577  19
   1  15  11 390.695 98.1388  10
   1 -15 -11 527.591 85.2003  12
  -1 -15  11 489.741 100.646  23
  -1  15 -11 475.107 73.5791  19
   1  15  12 9612.52 358.535  10
   1 -15 -12 9157.12 330.792  12
  -1  15 -12 10188.7 317.156  19
  -1  15 -13 4624.53 183.731  19
  -1 -15  13 4787.50 221.579  23
   1  15  13 4565.97 221.712  10
   1 -15 -13 4358.55 193.102  12
  -1  15 -14 232.333 51.9046  19
  -1 -15  14 174.755 73.4277  23
   1  15  14 245.494 77.4259  10
   1  15  15 2432.34 149.385  10
  -1 -15  15 2414.82 145.580  23
  -1 -15  16 879.727 92.3385  23
   1  15  16 687.320 86.6352  10
  -1 -15  17 1298.70 98.4077  23
   1  15  17 1076.27 94.8038  10
  -1 -15  18 4425.61 169.536  23
   1  15  18 3770.34 163.744  10
   1  15  19 2376.92 116.328  10
  -1 -15  19 2901.00 123.914  23
   1 -15 -20 11427.0 311.606  24
   1 -16  18 401.113 50.8356  23
   1  16 -17 422.207 52.9252  19
   1 -16  17 500.418 64.0928  23
   1  16 -16 983.605 77.4599  19
  -1  16  16 841.882 59.8257  17
   1 -16  16 1090.84 94.0951  23
  -1  16  15 13751.5 381.458  17
   1  16 -15 14791.4 408.293  19
   1  16 -14 4870.05 196.518  19
  -1  16  14 4831.19 177.701  17
  -1  16  13 2638.84 129.237  17
   1  16 -13 2682.98 145.513  19
  -1  16  12 5123.77 198.697  17
   1  16 -12 5585.37 223.511  19
  -1  16  11 10908.7 334.611  17
   1  16 -11 10572.6 355.150  19
  -1  16  10 12721.5 389.188  17
   1  16 -10 13336.6 418.291  19
  -1  16   9 3785.52 172.931  17
   1  16  -9 3898.85 199.845  19
   1 -16   9 4082.86 218.894  23
  -1  16   8 6633.12 243.569  10
  -1  16   8 6568.35 245.942  17
   1 -16   8 6864.09 291.800  23
   1  16  -8 6722.73 270.498  19
   1  16  -7 902.334 113.714  19
  -1  16   7 817.300 86.6240  10
  -1  16   7 822.284 89.7694  17
   1 -16   7 954.133 130.914  23
  -1  16   6 2796.18 153.736  17
  -1  16   6 2859.43 156.318  10
   1  16  -6 2829.64 170.428  19
   1 -16   6 2793.74 189.339  23
   1  16  -5 876.128 110.824  19
   1 -16   5 848.596 120.396  23
  -1  16   5 888.200 96.1017  10
   1  16  -4 1057.03 117.869  19
   1 -16   4 992.015 128.949  23
  -1  16   4 973.422 103.549  10
   1  16  -3 929.106 116.986  19
   1 -16   3 946.307 128.400  23
  -1  16   3 831.705 100.402  10
  -1  16   2 4193.48 209.111  10
   1 -16   2 4496.23 235.103  23
   1  16  -2 4807.92 226.627  19
  -1 -16  -2 4149.09 193.158  12
  -1  16   1 3073.87 178.682  10
  -1 -16  -1 2986.30 164.110  12
   1 -16   1 3227.04 203.156  23
   1  16  -1 3114.70 183.752  19
   1 -16   1 2966.07 194.531  12
   1 -16   0 14715.5 480.233  23
  -1 -16   0 14720.8 469.108  23
   1  16   0 13898.4 459.031  19
   1 -16   0 14362.0 485.908  12
   1  16   1 3276.07 191.072  19
  -1 -16   1 3348.69 194.559  23
   1 -16  -1 3008.95 193.257  23
   1 -16  -1 3256.95 200.712  12
  -1 -16   2 4479.68 226.167  23
   1 -16  -2 4310.01 232.791  12
   1  16   2 4379.32 243.097  10
   1  16   3 889.265 127.717  10
   1 -16  -3 881.346 113.706  12
  -1 -16   3 931.083 115.611  23
  -1  16  -3 938.487 96.7448  19
   1 -16  -4 1152.11 125.040  12
  -1  16  -4 1123.58 102.717  19
   1  16   4 1096.40 132.262  10
  -1 -16   4 1165.16 125.089  23
   1 -16  -5 856.464 107.003  12
  -1 -16   5 875.208 114.901  23
  -1  16  -5 941.212 93.4589  19
   1  16   5 958.266 122.749  10
   1  16   6 2695.82 180.823  10
  -1  16  -6 2764.74 146.431  19
  -1 -16   6 2709.45 174.117  23
   1 -16  -6 2576.88 144.975  14
   1 -16  -6 2859.14 175.057  12
  -1 -16   7 764.542 107.759  23
  -1  16  -7 786.611 82.4738  19
   1 -16  -7 786.618 80.1302  14
   1  16   7 864.441 118.389  10
   1 -16  -7 1033.97 111.483  12
  -1 -16   8 6840.80 273.019  23
   1 -16  -8 6119.21 259.060  12
   1  16   8 6509.82 279.634  10
  -1  16  -8 6273.53 230.649  19
  -1 -16   9 4108.36 201.493  23
   1 -16  -9 3381.32 180.498  12
   1  16   9 3865.67 206.161  10
  -1  16  -9 3805.97 165.088  19
   1  16  10 13445.0 427.595  10
   1 -16 -10 12367.8 395.840  12
  -1 -16  10 13929.7 422.539  23
  -1  16 -10 12989.0 372.177  19
  -1  16 -11 10448.6 307.874  19
  -1 -16  11 11198.5 355.975  23
   1 -16 -11 10302.5 330.423  12
   1  16  11 10265.0 357.569  10
  -1 -16  12 5683.24 227.290  23
   1  16  12 5070.66 223.026  10
   1 -16 -12 5077.35 194.982  12
   1  16  13 2541.95 148.484  10
  -1 -16  13 3096.27 156.527  23
  -1 -16  14 5182.28 202.050  23
   1  16  14 4786.43 200.473  10
  -1 -16  15 15103.7 408.509  23
   1  16  15 14181.6 411.595  10
   1  16  16 954.330 79.7150  10
  -1 -16  16 1119.21 80.1083  23
   1 -16 -17 449.593 49.6711  24
   1  16  17 372.935 50.3634  10
   1 -17  15 5765.52 190.350  23
   1  17 -15 5849.42 181.628  19
   1  17 -14 581.537 59.4254  19
   1 -17  14 602.157 66.3168  23
   1 -17  13 2614.26 133.989  23
   1  17 -13 2819.52 127.182  19
  -1  17  12 3651.69 131.975  17
   1  17 -12 3510.59 154.573  19
  -1  17  11 5753.84 187.849  17
   1 -17  11 5954.90 227.160  23
   1  17 -11 5872.22 214.529  19
  -1  17  10 5760.65 192.303  17
   1 -17  10 5882.11 230.525  23
   1  17 -10 5563.86 215.133  19
   1 -17   9 4219.92 194.852  23
  -1  17   9 4054.97 158.467  17
   1  17  -9 4189.78 183.446  19
  -1  17   8 6550.26 221.242  17
   1 -17   8 6881.83 262.235  23
   1  17  -8 6586.19 247.679  19
  -1  17   7 8785.59 276.608  17
   1  17  -7 8951.68 306.875  19
   1 -17   7 9227.55 319.727  23
   1  17  -6 398.523 80.9902  19
  -1  17   6 537.596 66.9916  17
   1 -17   6 482.229 96.3597  23
   1 -17   5 4657.96 217.899  23
  -1  17   5 4382.93 178.861  17
   1  17  -5 4754.58 210.640  19
   1 -17   5 4610.18 221.870  12
  -1  17   4 4660.53 193.187  10
  -1  17   4 4825.18 190.443  17
   1 -17   4 4952.74 231.062  23
   1  17  -4 5395.03 224.423  19
   1 -17   4 5062.41 234.857  12
   1 -17   3 2611.63 169.751  12
  -1  17   3 2543.74 139.200  10
   1  17  -3 2584.76 155.360  19
   1 -17   3 2583.66 167.891  23
   1 -17   2 1369.04 128.241  23
  -1  17   2 1238.21 101.626  10
   1  17  -2 1474.50 125.615  19
   1 -17   2 1400.24 127.532  12
  -1  17   1 8439.63 292.413  10
   1 -17   1 8609.69 320.860  23
   1  17  -1 8425.38 329.325  10
   1 -17   1 8342.94 321.413  12
  -1  17   0 5432.44 223.065  10
   1 -17   0 5258.85 245.045  12
   1  17   0 5412.04 250.251  10
   1 -17  -1 8194.43 316.134  12
   1  17   1 8668.23 330.474  10
  -1  17  -1 8544.24 297.036  10
  -1 -17   1 8207.10 283.458  12
   1  17   2 1497.31 134.950  10
   1 -17  -2 1400.28 125.324  12
  -1  17  -2 1261.35 108.342  10
  -1 -17   2 1452.75 108.167  12
   1 -17  -3 2592.85 160.520  12
   1  17   3 2316.18 162.267  10
  -1 -17   3 2444.31 151.326  23
  -1 -17   4 5062.54 219.752  23
   1  17   4 5360.37 242.673  10
   1 -17  -4 4866.59 202.198  14
   1 -17  -4 5141.59 227.280  12
   1  17   5 4433.32 217.056  10
   1 -17  -5 4283.01 181.081  14
  -1 -17   5 4826.53 208.346  23
   1 -17  -5 4355.03 203.430  12
   1 -17  -6 381.407 74.2897  12
   1 -17  -6 387.160 56.0618  14
  -1 -17   6 572.220 87.1814  23
   1  17   6 472.253 86.9471  10
  -1 -17   7 9311.52 305.614  23
   1  17   7 8427.41 311.273  10
   1 -17  -7 8512.84 296.427  12
   1 -17  -8 6257.53 234.881  12
  -1 -17   8 6659.23 243.627  23
   1  17   8 6678.98 258.097  10
   1  17   8 6231.63 240.559  17
   1  17   9 4066.95 189.630  10
   1  17   9 3990.16 176.630  17
   1 -17  -9 3875.11 165.966  12
  -1 -17   9 4046.41 177.567  23
   1  17  10 5402.98 208.232  17
  -1 -17  10 5473.41 206.058  23
   1  17  10 5620.76 219.572  10
   1 -17 -10 4991.31 186.553  12
  -1 -17  11 5836.22 209.430  23
   1  17  11 5478.26 208.875  17
   1  17  11 5948.66 221.462  10
   1  17  12 3895.59 164.425  10
   1  17  12 3507.05 156.271  17
  -1 -17  12 3858.02 154.943  23
   1  17  13 2408.15 120.285  17
   1  17  13 2568.20 126.599  10
   1  17  14 510.580 57.4859  10
   1  18 -11 157.212 37.9624  19
   1 -18  11 265.801 50.8481  12
   1 -18  11 177.338 43.5114  23
   1 -18  10 10339.9 297.228  23
   1  18 -10 9880.70 285.092  19
   1 -18   9 12439.8 350.826  23
   1  18  -9 12045.5 338.201  19
   1  18  -8 1627.37 99.7360  19
   1 -18   8 1698.43 107.805  23
   1 -18   8 1631.88 108.524  12
   1  18  -7 358.870 60.7095  19
   1 -18   7 318.510 64.0949  12
   1 -18   7 511.108 72.0270  23
   1 -18   6 13139.0 384.028  23
   1  18  -6 13054.2 372.802  19
   1 -18   6 12932.7 390.990  12
   1 -18   5 5930.15 232.774  12
   1 -18   5 6237.18 231.683  23
   1  18  -4 3604.20 178.958  10
   1 -18   4 3897.61 177.971  23
   1 -18   4 3717.24 177.715  12
   1  18  -3 5682.26 231.360  10
   1 -18   3 5633.43 227.176  12
   1 -18   2 11163.2 355.494  12
   1  18  -2 10970.4 359.429  10
   1  18  -1 5243.77 222.234  10
   1 -18   1 4991.68 212.258  12
   1 -18   0 92.8562 46.5357  14
   1  18   0 69.8521 64.9400  10
   1 -18   0 50.2483 55.8731  12
   1 -18  -1 4934.42 207.277  12
   1  18   1 5138.22 216.957  10
   1 -18  -1 4925.65 193.150  14
   1 -18  -2 10804.9 327.466  14
   1 -18  -2 11261.2 349.583  12
   1  18   2 11357.0 358.765  10
   1 -18  -3 5630.43 194.528  14
   1  18   3 5586.47 222.484  10
   1 -18  -3 5504.13 212.126  12
  -1  18  -4 3506.83 147.968  10
   1  18   4 3955.12 179.785  10
   1 -18  -4 3959.63 167.407  12
   1 -18  -4 3359.70 139.093  14
  -1 -18   4 3686.31 147.823  12
  -1  18  -5 5270.98 193.720  10
   1 -18  -5 5789.89 208.760  12
  -1 -18   5 5611.08 196.886  12
   1  18   6 12824.7 356.466  17
   1  18   6 13251.9 372.390  10
  -1  18  -6 10990.9 331.695  10
   1 -18  -6 12267.9 346.155  12
  -1 -18   6 11508.3 338.183  12
   1 -18  -7 313.584 45.5596  12
   1  18   7 290.621 56.0571  17
   1  18   7 444.735 67.0366  10
  -1  18  -7 293.491 48.5933  10
   1  18   8 1809.85 105.490  17
   1  18   8 1803.95 108.080  10
   1  18   9 12237.4 339.533  17
   1  18   9 12005.2 345.529  10
   1  18  10 9707.82 287.367  10
   1  18  10 10033.7 284.055  17
   1  18  11 168.892 39.2994  17
   1  18  11 121.624 36.1147  10
   1  19  -6 1222.26 84.1543  10
   1 -19   6 3473.52 114.745  14
   1 -19   5 13221.0 308.412  12
   1 -19   5 13187.3 300.168  14
   1 -19   4 3450.48 128.468  14
   1 -19   4 3466.20 135.056  12
   1 -19   3 1734.12 94.4372  12
   1 -19   3 1677.20 87.0689  14
   1  19  -3 1464.85 92.9512  10
   1 -19   2 2776.51 114.272  14
   1 -19   2 2990.67 124.528  12
   1 -19   1 9753.84 271.156  14
   1 -19   1 10261.6 284.806  12
   1  19   0 467.583 57.8611  10
   1 -19   0 645.622 58.6293  12
   1  19   1 9821.86 293.496  10
   1 -19  -1 10083.7 285.425  12
   1  19   2 2236.08 110.601  10
   1  19   3 1580.18 84.5880  17
   1  19   3 1404.72 86.1668  10
   1  19   4 3203.09 132.174  10
   1  19   4 3460.27 129.989  17
   1  19   5 12853.3 315.858  17
   1  19   5 10358.2 311.020  10
  -2   0   0 890804. 18804.4   3
  -2   0   0 823049. 18770.1   6
  -2   0  -1 14508.1 402.421   3
  -2   0   1 14328.4 412.928   4
  -2   0   1 14400.9 398.321   3
  -2   0  -1 14056.1 375.102   7
  -2   0  -1 14107.5 391.969   4
  -2   0   1 15109.7 371.450   6
  -2   0  -1 14606.4 383.724   6
  -2   0  -2 124612. 2763.12   3
  -2   0  -2 126943. 2745.91   4
  -2   0  -2 125161. 2732.23   7
  -2   0   2 130890. 2793.76   4
  -2   0  -2 129144. 2749.18   6
  -2   0   2 118774. 2711.35   6
  -2   0   3 285536. 6110.14   6
  -2   0  -3 280396. 6159.30   6
  -2   0  -3 284442. 6138.39   7
  -2   0  -3 289187. 6174.74   3
  -2   0  -4 25153.9 602.925   7
  -2   0  -4 24289.1 634.883   3
  -2   0   4 25125.8 594.424   2
  -2   0  -4 24503.0 625.348   6
  -2   0   5 19511.4 492.419   2
  -2   0  -5 20264.3 530.348   6
  -2   0  -5 19244.0 536.169   3
   2   0   5 20721.8 525.271   4
  -2   0  -5 19733.7 501.084   7
  -2   0  -5 21089.7 523.370   1
  -2   0  -6 130947. 2925.81   2
  -2   0   6 130495. 2842.98   2
   2   0   6 132696. 2870.78   4
  -2   0  -6 125568. 2879.91   6
  -2   0  -6 126033. 2844.62   7
  -2   0  -6 134630. 2865.83   1
   2   0   6 129404. 2947.13   3
  -2   0  -7 8539.52 259.074   1
  -2   0   7 8364.34 257.783   2
   2   0   7 8534.48 273.482   4
   2   0   7 8895.56 338.846   3
  -2   0  -7 8678.95 260.223   7
  -2   0  -7 8255.14 312.440   2
   2   0   8 41817.1 1012.50   4
  -2   0   8 42273.4 1002.22   2
  -2   0  -8 42778.0 993.137   1
  -2   0  -8 42467.4 1076.75   2
   2   0   8 43181.1 1111.33   3
   2   0   9 8043.47 276.086   4
   2   0  -9 8628.12 274.623   9
   2   0  -9 8535.11 260.467  24
  -2   0  -9 8553.24 257.747   1
   2   0   9 8457.90 288.105   7
  -2   0  -9 8279.53 319.994   2
   2   0   9 7907.72 222.498  22
  -2   0   9 8192.18 272.009   2
   2   0  -9 8357.89 267.545  12
   2   0   9 8158.78 346.191   3
   2   0  10 2319.68 131.710   4
   2   0 -10 2283.31 112.607  11
   2   0  10 2166.72 134.690   7
   2   0  10 2015.29 170.529   3
   2   0 -10 2445.51 121.556  24
  -2   0 -10 2589.44 164.991   2
   2   0  10 2233.26 117.638  10
   2   0  10 2194.64 91.8409  22
   2   0 -10 2285.47 126.161  12
  -2   0  10 2200.14 128.766   2
   2   0 -10 2175.08 122.395   9
   2   0 -11 15574.1 440.487   9
   2   0 -11 15164.9 421.129  24
   2   0 -11 15444.6 415.109  11
  -2   0 -11 15086.5 497.819   2
   2   0 -11 15171.7 435.473  12
   2   0  11 15336.0 381.130  22
   2   0  11 15233.9 463.076   7
   2   0  11 14979.8 424.503  10
  -2   0  11 15100.2 460.859   2
   2   0  11 14219.0 442.833   4
   2   0  11 15641.2 381.503  13
   2   0  11 14978.1 545.475   3
   2   0  12 79080.7 1999.07   3
   2   0  12 78896.0 1823.15  10
   2   0  12 81815.2 1879.09   7
   2   0 -12 82271.6 1840.70   9
  -2   0 -12 78439.5 1917.07   2
   2   0 -12 80131.6 1804.20  11
   2   0  12 80316.1 1767.15  13
   2   0 -12 81938.4 1817.50  24
   2   0  12 76799.7 1850.99   4
  -2   0  12 81047.1 1890.18   2
   2   0  12 79092.1 1764.12  22
   2   0  13 2211.62 108.905  17
   2   0 -13 2265.85 134.018   9
   2   0 -13 2170.97 115.281  11
   2   0  13 2132.94 102.636  16
   2   0  13 2181.56 130.847  10
  -2   0  13 2243.54 159.536   2
   2   0 -13 2153.72 124.232  24
   2   0  13 2387.24 121.559  23
   2   0  13 2190.31 99.2311  22
   2   0 -14 16992.9 442.591  18
   2   0  14 17419.1 457.364  17
   2   0 -14 16476.5 460.118  11
   2   0  14 17113.7 440.573  16
   2   0  14 17084.0 470.086  23
   2   0  14 17753.9 436.889  22
   2   0  14 17279.4 495.835  10
   2   0 -14 17738.0 483.312  24
  -2   0  14 16696.5 562.410   2
   2   0 -14 17743.7 503.466   9
   2   0 -15 33297.4 817.072  18
   2   0  15 34396.6 886.611  10
   2   0 -15 33828.3 839.745  11
   2   0  15 35783.0 821.229  16
   2   0 -15 35590.5 867.577  24
   2   0 -15 34780.7 889.081   9
   2   0  15 35420.8 815.890  22
   2   0  15 34788.2 857.311  23
   2   0 -16 138145. 3066.03  18
   2   0 -16 140703. 3090.91  11
   2   0  16 140443. 3072.62  16
   2   0  16 137129. 3068.06  22
   2   0 -16 140288. 3123.69  24
  -2   0  16 141205. 3111.21  23
   2   0 -16 141891. 3149.94   9
   2   0  16 142476. 3121.01  23
   2   0  16 143961. 3156.22  10
   2   0  17 43861.3 1092.55  10
  -2   0  17 43121.7 1050.64  23
   2   0  17 44023.2 1009.99  16
   2   0 -17 42732.3 1056.80  24
   2   0  17 43684.7 1059.32  23
   2   0  17 42912.2 1007.36  22
   2   0 -17 42509.1 998.549  18
   2   0 -17 43213.4 1083.03   9
   2   0  18 8628.54 268.427  16
   2   0  18 8498.40 330.204  10
   2   0  18 8692.93 309.946  23
   2   0 -18 8560.67 303.391  24
  -2   0  18 8931.07 305.040  23
   2   0 -18 8302.43 318.082   9
   2   0 -19 307.985 72.4987   9
   2   0  19 348.975 66.5189  16
   2   0 -19 279.700 69.1655  24
  -2   0  19 286.714 71.9374  23
   2   0  19 278.917 77.6381  23
   2   0 -20 517.205 81.4411   9
   2   0  20 466.961 71.8568  16
  -2   0  20 437.495 81.3040  23
   2   0 -20 469.708 78.1651  24
   2   0  20 372.748 85.9524  23
   2   0  20 542.258 106.924  10
   2   0  21 29198.7 719.065  16
   2   0  21 29304.2 778.648  23
  -2   0  21 28175.9 763.719  23
   2   0 -21 28413.7 751.859  24
   2   0  21 29754.3 817.490  10
   2   0  22 119.130 61.9989  16
   2   0  22 99.2426 93.4624  10
   2   0 -22 36.2170 49.7851  24
  -2   0  22 228.039 74.6636  23
   2   0  22 59.9507 71.9542  23
   2   0  23 17687.6 481.016  16
   2   0 -23 17233.6 493.796  24
   2   0  23 18583.1 572.695  10
   2   0  23 17973.6 538.172  23
  -2   0  23 18135.7 527.321  23
   2   0  24 910.877 127.403  10
   2   0  24 995.506 115.733  23
  -2   0  24 1036.64 106.397  23
   2   0  25 4184.90 230.088  10
   2   0  25 4081.45 205.161  23
  -2   0  25 4360.83 201.545  23
  -2   0  26 121.292 66.2017  23
   2   0  26 48.9468 82.5051  10
   2   0  26 133.416 71.0588  23
   2   0  27 1633.88 135.928  10
  -2   0  27 1646.95 113.265  23
   2   0  27 1661.63 121.274  23
   2   0  28 5848.19 244.642  10
   2   0  28 5920.33 222.978  23
  -2   0  28 5923.05 212.550  23
   2   0  29 2625.29 129.075  23
   2   0  29 2676.68 148.824  10
  -2   0  29 2603.74 118.088  23
   2   0 -29 2578.81 126.702  21
   2   0  30 334.813 60.9350  10
   2   0 -30 244.478 40.7349  21
   2   0  30 232.062 46.3799  23
   2   0  31 1506.93 87.1431  10
   2   0 -31 1370.69 83.9376  13
   2   1 -31 2567.44 110.690  13
   2  -1  31 2519.80 105.613  20
   2  -1  30 1555.99 88.1457  23
   2  -1  30 1407.58 99.5674  10
   2   1 -30 1622.85 100.707  13
   2   1 -30 1659.95 90.9052  21
   2  -1  29 3959.90 163.466  23
   2  -1  29 3899.70 179.246  10
  -2   1  29 3820.25 150.557  23
   2   1 -29 4037.48 164.946  21
   2  -1  28 1956.29 137.795  10
   2  -1  28 1943.54 122.663  23
  -2   1  28 1972.26 114.338  23
   2  -1  27 3527.80 194.885  10
  -2   1  27 3647.86 168.399  23
   2  -1  27 3721.79 178.250  23
   2  -1  26 2897.46 189.340  10
   2  -1  26 3064.90 170.983  23
  -2   1  26 3238.35 164.177  23
   2  -1  25 6264.03 258.792  23
   2  -1  25 6000.51 279.311  10
  -2   1  25 5979.15 242.950  23
  -2   1  24 3176.32 174.069  23
   2  -1  24 3319.01 207.068  10
   2  -1  24 2981.51 178.723  23
   2  -1  23 5437.49 208.256  16
   2  -1  23 5083.67 261.381  10
   2  -1  23 5468.27 247.981  23
  -2   1  23 5297.18 233.606  23
   2  -1  22 2943.78 147.952  16
   2  -1  22 2720.39 193.546  10
   2  -1  22 2683.06 173.540  23
  -2   1  22 2927.22 169.814  23
   2  -1  21 2006.90 148.329  23
   2   1 -21 1923.97 122.926  24
  -2   1  21 1850.02 137.342  23
   2  -1  21 2281.44 175.352  10
   2  -1  21 1940.80 117.591  16
   2   1 -20 52553.0 1270.52  24
   2  -1  20 55059.5 1343.36  10
  -2   1  20 54319.0 1295.51  23
   2  -1  20 52275.2 1301.21  23
   2  -1  20 53524.2 1243.39  16
   2  -1  19 5744.22 209.631  16
  -2   1  19 6060.57 242.543  23
   2  -1  19 5733.50 268.155  10
   2   1 -19 5600.59 228.392  24
   2  -1  19 5855.38 247.463  23
   2   1 -18 43790.3 1014.01  18
   2   1 -18 44676.1 1099.38   9
   2  -1  18 43924.2 1083.74  23
   2  -1  18 43574.1 1114.08  10
   2   1 -18 43083.5 1067.40  24
   2  -1  18 44455.2 1032.33  16
   2   1 -17 1786.03 121.932  24
   2  -1  17 1860.81 104.876  16
   2   1 -17 1694.55 95.8160  18
   2  -1  17 1719.59 140.972  10
   2  -1  17 1724.00 126.308  23
   2   1 -17 1750.92 128.694   9
   2   1 -16 43005.0 1004.15  18
   2  -1  16 44169.2 1010.61  16
   2   1 -16 44306.5 1054.30  24
   2  -1  16 41968.9 1081.90  10
   2  -1  16 42185.3 1005.35  22
   2  -1  16 44036.2 1056.21  23
   2   1 -16 44739.6 1081.93   9
   2   1 -15 43519.6 1045.59  11
   2  -1  15 44958.1 1032.30  16
   2   1 -15 44921.7 1075.00  24
   2   1 -15 44042.9 1030.64  18
   2  -1  15 45585.1 1074.15  23
   2  -1  15 44606.1 1100.69  10
   2   1 -15 45352.7 1100.63   9
   2  -1  15 44905.6 1028.00  22
   2  -1  14 29157.7 757.105  10
   2   1 -14 29183.3 716.151  11
   2   1 -14 29586.6 738.433  24
   2  -1  14 30071.0 693.458  22
   2  -1  14 28519.6 696.828  16
   2   1 -14 27726.3 698.315  18
   2  -1  14 29964.1 734.512  23
   2   1 -14 30485.5 764.543   9
   2  -1  13 8242.96 292.420  10
   2   1 -13 8701.97 269.019  11
  -2   1  13 8024.74 331.488   2
   2  -1  13 9091.15 247.382  22
   2   1 -13 8462.97 280.769  24
   2   1 -13 8865.59 258.330  18
   2  -1  13 8700.49 276.307  23
   2   1 -13 9049.83 303.646   9
   2  -1  12 15867.1 498.283   7
  -2  -1 -12 16063.7 540.057   2
   2   1 -12 15738.2 430.117  11
   2  -1  12 15987.8 580.663   3
  -2   1  12 16247.9 523.615   1
   2   1 -12 17020.3 449.051  24
   2   1 -12 15267.1 415.050  18
   2  -1  12 16817.2 403.792  22
  -2   1  12 16219.0 504.607   2
   2  -1  12 16137.0 433.909  23
   2  -1  12 16689.5 458.315  10
  -2  -1 -12 15961.9 484.850   5
   2   1 -12 16381.8 465.044   9
   2  -1  11 12042.6 469.617   3
   2  -1  11 12185.2 363.817  10
   2  -1  11 11722.0 358.079   4
   2   1 -11 12481.5 357.147  24
  -2  -1 -11 12706.1 377.939   1
   2   1 -11 12541.5 375.103   9
  -2  -1 -11 12097.9 440.565   2
   2   1 -11 12131.9 346.879  11
   2  -1  11 12604.1 344.716  23
  -2   1  11 13262.6 406.713   2
  -2  -1 -11 12590.7 396.315   5
   2  -1  11 12606.3 318.089  22
   2  -1  10 5798.45 209.496  10
   2  -1  10 6057.81 210.915   4
   2  -1  10 5926.68 290.792   3
   2  -1  10 5971.21 174.422  22
  -2  -1 -10 6293.72 227.827   1
  -2   1  10 6154.43 233.199   2
   2   1 -10 6166.07 210.626  24
   2   1 -10 5716.75 199.639  11
  -2  -1 -10 5862.03 235.378   5
  -2  -1 -10 6219.06 284.805   2
   2   1 -10 6236.45 223.515   9
   2  -1   9 3880.79 218.382   3
   2   1  -9 3577.54 145.149  11
   2   1  -9 3638.40 158.540   9
   2   1  -9 3740.13 151.328  24
   2  -1   9 3769.46 122.716  22
  -2   1   9 3749.70 161.897   2
  -2  -1  -9 4028.95 168.781   1
   2  -1   9 3520.88 146.801   4
  -2  -1  -9 3741.09 209.494   2
  -2  -1  -8 14415.5 406.872   1
   2   1  -8 14168.1 391.552   9
   2  -1   8 14015.0 377.214   4
  -2  -1  -8 13121.8 454.546   2
  -2   1   8 13584.6 381.453   2
   2  -1   8 13788.5 464.830   3
  -2   1   7 34634.8 776.998   5
  -2   1   7 36185.2 841.020   2
   2  -1   7 37364.4 845.963   4
  -2   1   7 36798.9 781.855   6
  -2  -1  -7 38582.6 892.036   1
   2  -1   7 37332.2 946.138   3
  -2   1   6 1438.23 57.5805   6
  -2  -1  -6 1472.54 111.237   3
   2  -1   6 1514.19 81.9648   4
  -2   1   6 1533.94 76.1051   2
  -2  -1  -6 1659.05 107.046   1
   2  -1   6 1753.28 126.689   3
  -2   1   5 64254.1 1488.74   2
  -2   1   5 69601.1 1480.23   6
   2  -1   5 69314.1 1592.36   3
  -2  -1  -5 66555.1 1507.94   7
  -2  -1  -5 70143.4 1583.09   3
  -2  -1  -4 81060.3 1796.05   7
  -2   1   4 86342.7 1781.93   6
   2  -1   4 84046.3 1866.72   3
  -2  -1  -4 84515.4 1873.14   3
  -2  -1  -3 192244. 4179.11   7
  -2  -1  -3 195827. 4252.84   3
  -2   1   3 195494. 4159.27   2
  -2   1   3 190364. 4172.50   6
  -2  -1  -2 104627. 2329.62   7
  -2   1   2 107324. 2337.99   3
  -2   1   2 106924. 2332.90   6
  -2  -1  -2 108589. 2403.03   3
  -2  -1  -1 61572.0 1414.24   4
  -2   1   1 60439.7 1407.86   4
  -2  -1  -1 61487.9 1366.89   7
  -2  -1  -1 58593.2 1428.45   3
  -2   1   1 61450.5 1375.73   6
  -2   1   1 62825.1 1375.03   3
  -2   1   0 333.141 51.5974   4
  -2  -1   0 475.022 68.2287   3
  -2  -1   0 454.860 65.4805   4
  -2  -1   0 440.479 45.2385   7
  -2   1   0 419.732 46.8474   3
  -2   1   0 424.314 48.8720   6
  -2   1  -1 62174.2 1386.90   3
  -2   1  -1 62070.5 1391.66   4
  -2  -1   1 61995.0 1441.38   4
  -2   1  -1 60458.2 1397.77   6
  -2   1  -2 101128. 2339.99   3
  -2   1  -2 109086. 2331.69   4
  -2  -1   2 109692. 2409.36   4
  -2   1  -2 106531. 2347.72   7
  -2   1  -2 107379. 2358.00   6
  -2  -1   2 105978. 2311.63   5
  -2   1  -3 193165. 4222.26   7
  -2  -1   3 195783. 4295.88   4
   2   1   3 190924. 4262.12   4
  -2   1  -3 194746. 4237.83   6
  -2  -1   3 195490. 4175.05   5
   2   1   4 86581.8 1891.62   4
  -2  -1   4 80983.6 1788.28   5
  -2   1  -4 83813.0 1848.26   7
  -2   1  -4 86154.1 1872.70   6
  -2   1  -4 82518.6 1877.87   2
  -2   1  -5 73441.3 1537.34   1
   2   1   5 69698.5 1595.07   4
  -2   1  -5 67044.9 1553.83   7
  -2   1  -5 68628.8 1585.14   6
  -2  -1   5 64379.6 1552.35   2
  -2   1  -5 70984.6 1601.94   2
   2   1   6 1510.69 105.765   4
  -2   1  -6 1513.33 107.711   2
  -2  -1   6 1353.03 85.3627   2
  -2   1  -6 1590.50 90.9751   7
  -2   1  -6 1406.96 68.8848   1
  -2   1  -6 1223.02 97.5469   6
  -2  -1   7 35183.6 863.402   2
  -2   1  -7 36538.9 909.960   2
  -2   1  -7 37065.4 824.667   1
   2   1   7 36493.4 875.202   7
  -2   1  -7 35275.5 856.628   7
   2   1   7 34987.5 893.928   4
   2   1   8 14715.1 428.258   4
  -2  -1   8 14641.9 405.905   2
   2   1   8 14573.0 412.091   7
  -2   1  -8 14091.4 437.086   2
   2  -1  -8 14320.2 387.201  24
  -2   1  -8 13498.4 389.108   7
   2   1   8 14334.0 493.425   3
   2  -1  -8 13838.1 396.445  12
   2  -1  -9 3833.68 164.097   9
  -2   1  -9 3963.20 191.665   2
   2   1   9 3744.79 226.150   3
   2   1   9 3834.08 171.681   7
  -2  -1   9 3511.90 161.742   2
  -2   1  -9 3557.95 176.883   6
   2   1   9 3397.87 172.045   4
   2  -1  -9 3676.67 153.589  24
   2   1   9 3473.66 123.416  22
   2  -1  -9 3423.29 156.666  12
   2   1  10 5872.29 178.640  13
   2  -1 -10 5970.90 224.846   9
   2  -1 -10 6173.50 214.594  24
   2   1  10 6231.64 248.376   4
   2   1  10 5936.64 212.236  10
   2  -1 -10 6113.37 198.968  15
   2  -1 -10 5832.36 205.697  11
   2   1  10 6019.91 179.576  22
  -2  -1  10 6239.36 236.839   2
   2  -1 -10 5721.74 219.548  12
  -2   1 -10 5847.80 252.737   2
   2   1  10 5984.41 235.477   7
   2   1  10 5907.72 304.638   3
  -2   1 -11 12247.9 417.568   2
   2  -1 -11 12617.8 382.065   9
   2   1  11 11968.9 402.049   4
   2  -1 -11 12367.7 344.377  15
   2   1  11 12813.6 323.833  13
   2  -1 -11 12053.7 353.271  11
  -2  -1  11 11896.7 395.069   2
   2   1  11 12078.8 362.707  10
   2   1  11 12311.9 320.442  22
   2  -1 -11 12711.2 363.149  24
   2   1  11 11898.2 390.236   7
   2   1  11 12707.1 493.413   3
  -2  -1  12 16359.4 432.809  23
   2   1  12 16746.0 417.830  13
   2   1  12 14794.8 496.206   4
   2   1  12 16323.6 429.613  17
  -2  -1  12 16594.2 511.952   2
  -2   1 -12 16896.9 528.212   2
   2   1  12 16195.4 496.281   7
   2  -1 -12 16843.0 459.815  24
   2   1  12 16598.5 413.999  22
   2   1  12 16977.4 611.818   3
   2  -1 -12 17036.1 479.614   9
   2  -1 -12 16355.8 448.543  11
   2   1  12 16565.0 464.807  10
   2  -1 -13 8751.23 303.140   9
   2   1  13 7704.14 319.371   4
   2   1  13 8390.11 260.913  17
   2  -1 -13 8437.57 273.119  11
  -2   1 -13 8237.95 337.383   2
   2   1  13 8342.17 246.146  13
   2  -1 -13 8915.83 289.468  24
   2   1  13 8842.06 246.570  22
  -2  -1  13 8269.32 263.883  23
   2   1  13 8888.15 296.576  10
  -2  -1  13 8380.47 340.317   2
   2  -1 -14 30178.6 776.246   9
   2  -1 -14 29306.4 732.816  11
   2   1  14 28802.9 721.877  17
   2  -1 -14 31061.5 776.359  12
   2   1  14 29065.0 763.634  10
   2  -1 -14 29999.4 753.642  24
   2   1  14 29061.5 699.198  22
  -2  -1  14 30294.9 730.920  23
  -2  -1  14 27275.7 832.093   2
   2   1  15 44184.7 1048.91  17
   2  -1 -15 43497.0 1053.94  11
   2   1  15 44861.8 1024.79  16
   2   1  15 44812.9 1022.17  22
   2   1  15 44489.4 1095.03  10
   2  -1 -15 45700.5 1081.74  24
  -2  -1  15 45282.1 1058.20  23
   2  -1 -15 42373.0 1020.93  18
   2  -1 -15 45265.6 1106.10   9
   2  -1 -16 41113.3 991.229  18
   2   1  16 43143.7 1027.99  17
   2  -1 -16 44379.5 1081.28   9
   2   1  16 43910.0 1000.38  16
   2  -1 -16 43033.7 1054.35  24
   2  -1 -16 41679.1 1021.73  11
   2   1  16 42726.9 998.299  22
  -2  -1  16 45003.9 1040.46  23
   2   1  16 43078.9 1077.82  10
   2  -1 -17 1779.21 129.667  24
   2   1  17 1830.26 141.449  10
  -2  -1  17 1785.13 120.752  23
   2   1  17 1760.85 100.834  16
   2   1  17 1666.94 101.277  22
   2   1  17 1667.33 111.757  17
   2  -1 -17 1822.54 135.595   9
   2   1  18 42974.4 1021.91  16
  -2  -1  18 44963.4 1070.44  23
   2   1  18 44409.1 1116.83  10
   2   1  18 43708.9 1077.78  23
   2  -1 -18 43431.3 1081.33  24
   2  -1 -18 43079.4 1101.95   9
   2   1  19 5767.16 267.537  10
   2   1  19 5610.58 204.411  16
  -2  -1  19 5354.11 226.104  10
   2  -1 -19 6076.05 246.302  24
  -2  -1  19 6131.97 241.622  23
   2  -1 -19 5442.76 247.866   9
   2   1  19 5895.54 246.295  23
   2   1  20 55202.9 1304.23  23
  -2  -1  20 51370.0 1278.44  10
   2   1  20 54126.2 1343.19  10
   2  -1 -20 53808.6 1293.27  24
  -2  -1  20 53785.3 1289.89  23
   2   1  20 53317.4 1236.29  16
   2  -1 -20 52867.0 1312.71   9
   2   1  21 1854.49 163.454  10
   2   1  21 1763.47 110.758  16
   2  -1 -21 1899.06 135.041  24
   2  -1 -21 1948.01 138.952   9
  -2  -1  21 1857.99 136.110  23
   2   1  21 1932.40 146.318  23
   2  -1 -22 2800.46 160.843  24
   2   1  22 2837.73 139.090  16
   2   1  22 2818.86 197.054  10
   2   1  22 3008.40 178.390  23
  -2  -1  22 3201.92 175.841  23
   2  -1 -22 2873.91 168.208   9
   2   1  23 5563.69 271.279  10
   2   1  23 5200.11 197.327  16
   2   1  23 5440.91 245.194  23
  -2  -1  23 5468.23 236.419  23
   2  -1 -23 4940.78 215.661  24
   2   1  24 3112.85 146.262  16
  -2  -1  24 3330.22 178.475  23
   2   1  24 3228.80 183.344  23
   2   1  24 3433.47 209.692  10
   2  -1 -24 3307.87 160.811  24
  -2  -1  25 6289.73 247.832  23
   2   1  25 5735.16 273.772  10
   2   1  25 5918.33 251.396  23
   2   1  26 3129.38 191.241  10
   2   1  26 3285.92 174.800  23
  -2  -1  26 3141.75 163.633  23
   2   1  27 3472.39 174.271  23
   2   1  27 3527.56 192.661  10
  -2  -1  27 3531.76 164.522  23
   2   1  28 1828.44 136.359  10
  -2  -1  28 1932.72 111.422  23
   2   1  28 1797.93 118.422  23
   2   1  29 3968.88 183.807  10
  -2  -1  29 4107.07 152.482  23
   2  -1 -29 4140.98 158.152  21
   2   1  29 4016.60 163.379  23
   2   1  30 1469.65 103.110  10
   2  -1 -30 1434.83 74.5892  21
   2   1  30 1459.22 83.5210  23
   2   1  31 2315.00 107.350  10
   2   2 -31 1648.07 85.0552  13
   2  -2  31 1683.07 78.7015  20
   2   2 -30 2431.22 119.739  13
   2   2 -30 2265.16 111.103  21
   2  -2  30 2428.40 108.578  23
   2  -2  29 1140.85 99.1846  10
   2  -2  29 1131.96 88.2769  23
  -2   2  29 1069.69 76.4891  23
   2   2 -29 1222.36 97.4418  13
   2   2 -29 994.961 85.1000  21
   2  -2  28 6998.46 266.120  10
  -2   2  28 6870.53 232.779  23
   2  -2  28 6723.28 243.030  23
   2  -2  27 20395.1 550.497  23
  -2   2  27 20988.0 540.375  23
   2  -2  26 3640.64 206.507  10
   2  -2  26 3610.98 185.124  23
  -2   2  26 3615.55 176.363  23
   2  -2  25 2713.73 188.499  10
   2  -2  25 2580.13 163.263  23
  -2   2  25 2614.00 154.638  23
   2  -2  24 9661.15 361.478  10
   2  -2  24 8542.22 327.300  23
  -2   2  24 8948.89 321.612  23
   2  -2  23 17496.4 554.547  10
   2  -2  23 16446.3 515.750  23
  -2   2  23 17164.1 509.731  23
   2  -2  22 2241.39 133.453  16
   2  -2  22 2286.38 178.754  10
   2  -2  22 2226.26 158.381  23
  -2   2  22 2452.65 158.194  23
   2  -2  21 14325.6 415.857  16
   2  -2  21 14887.8 493.335  10
   2  -2  21 14315.2 459.739  23
  -2   2  21 14606.8 452.801  23
   2  -2  20 1751.42 115.020  16
   2  -2  20 1690.75 150.608  10
   2  -2  20 1815.00 139.423  23
   2   2 -19 9147.39 302.902  24
   2  -2  19 9196.74 289.676  16
   2  -2  19 9550.43 356.422  10
   2  -2  19 9188.33 331.999  23
   2  -2  18 15832.9 424.594  16
   2  -2  18 15973.4 494.479  10
   2  -2  18 15351.1 465.747  23
   2   2 -18 14582.5 438.755  24
   2   2 -17 55477.8 1249.41  18
   2  -2  17 55529.9 1337.82  10
   2   2 -17 52705.4 1284.51  24
   2  -2  17 54473.4 1307.82  23
   2  -2  17 54922.1 1258.14  16
   2   2 -16 11694.8 317.650  18
   2  -2  16 10315.6 315.705  16
   2  -2  16 11539.5 382.590  10
   2   2 -16 11276.5 346.970  24
   2  -2  16 11169.7 356.599  23
   2  -2  15 716.016 91.1523  10
   2   2 -15 677.099 64.9942  18
   2   2 -15 606.366 60.4629  11
   2   2 -15 557.789 70.3741  24
   2   2 -14 17777.5 504.774   9
   2   2 -14 17885.4 452.676  18
   2   2 -14 17313.7 477.891  24
   2  -2  14 17659.7 482.374  23
   2  -2  14 17130.1 438.657  22
   2   2 -14 16934.7 457.172  11
   2  -2  14 18206.9 506.451  10
   2   2 -13 91517.0 2056.04  11
  -2   2  13 93921.7 2070.18  17
   2   2 -13 91020.0 2073.99  24
   2  -2  13 91750.1 2028.28  22
   2  -2  13 92220.8 2097.98  10
   2   2 -13 91227.0 2042.99  18
   2  -2  13 92901.9 2072.92  23
   2   2 -13 94444.3 2106.04   9
  -2   2  12 50414.2 1163.27  17
   2   2 -12 48967.6 1155.33  11
   2  -2  12 49250.0 1134.85  16
  -2   2  12 49543.4 1279.84   1
   2  -2  12 51021.5 1188.55  10
  -2  -2 -12 50926.9 1224.75   1
   2  -2  12 48745.1 1329.83   3
   2   2 -12 49559.6 1143.88  18
   2  -2  12 50056.0 1164.94  23
   2   2 -12 50764.8 1172.98  24
  -2  -2 -12 49350.7 1312.52   2
   2  -2  12 51331.6 1127.03  22
  -2   2  12 48831.3 1205.76   3
   2   2 -12 50741.0 1197.94   9
  -2  -2 -12 51138.3 1230.01   5
  -2  -2 -11 20858.0 667.794   2
   2  -2  11 22182.2 563.779  10
  -2   2  11 20946.4 570.090   3
  -2  -2 -11 21915.8 599.844   1
   2   2 -11 21715.6 529.231  18
  -2   2  11 21382.3 538.669  17
  -2  -2 -11 21809.5 596.386   5
   2  -2  11 21711.9 682.238   3
   2   2 -11 20656.9 538.152  11
  -2   2  11 22004.0 641.012   1
   2  -2  11 20975.7 517.216  16
   2  -2  11 21013.0 540.416  23
   2   2 -11 21770.9 572.107   9
   2  -2  11 21441.1 508.069  22
   2   2 -11 21258.3 550.323  24
   2   2 -10 17287.7 448.633  18
   2   2 -10 17428.0 459.219  11
   2  -2  10 18182.8 475.107  10
   2  -2  10 17340.1 435.504   4
  -2   2  10 18773.2 544.619   1
  -2   2  10 18475.4 483.255   3
   2  -2  10 17560.9 427.795  22
  -2  -2 -10 16735.6 575.613   2
   2  -2  10 17411.1 574.137   3
   2   2 -10 17492.3 467.993  24
   2  -2  10 17971.9 439.386  16
  -2  -2 -10 18932.4 521.059   1
   2   2 -10 18995.1 493.375   9
  -2  -2 -10 18266.7 511.278   5
  -2  -2  -9 67854.1 1700.15   2
   2   2  -9 72788.0 1596.29   9
   2   2  -9 69662.5 1551.49  18
  -2   2   9 73711.3 1653.64   1
   2  -2   9 69324.6 1530.24   4
   2   2  -9 68892.5 1570.45  24
   2  -2   9 68919.8 1690.98   3
   2   2  -9 70142.0 1565.14  11
   2  -2   9 66392.3 1535.78  16
  -2  -2  -9 73561.6 1635.70   1
  -2   2   8 325203. 6981.98   2
   2   2  -8 328214. 6957.34  18
  -2  -2  -8 330385. 7045.59   1
  -2  -2  -8 343592. 7089.71   3
   2   2  -8 339453. 7000.88   9
   2  -2   8 343183. 7098.67   3
  -2   2   7 24835.6 600.635   2
  -2  -2  -7 24722.3 689.240   3
   2  -2   7 24946.7 689.669   3
  -2  -2  -7 23634.0 635.080   5
  -2  -2  -6 125006. 2690.98   1
  -2  -2  -6 118136. 2633.05   5
   2  -2   6 119141. 2684.57   3
  -2   2   6 119509. 2581.34   2
  -2  -2  -5 47439.5 1178.46   3
  -2  -2  -5 49079.8 1120.36   5
   2  -2   5 49340.0 1156.09   3
  -2   2   5 47012.0 1056.55   2
  -2   2   4 3269.85 101.663   3
  -2  -2  -4 3491.14 179.816   3
  -2   2   4 3301.43 94.2698   2
  -2  -2  -4 3556.41 145.070   5
   2  -2   4 3406.41 159.175   3
  -2   2   3 11517.0 264.624   3
  -2  -2  -3 11427.2 318.500   5
  -2  -2  -3 11730.4 295.039   7
  -2   2   3 10898.2 257.597   2
  -2  -2  -3 12291.8 382.771   3
   2  -2   3 11872.3 337.615   3
   2   2  -2 24839.4 576.309   6
  -2   2   2 23659.5 532.378   2
  -2   2   2 24516.4 538.341   3
  -2  -2  -2 24873.5 567.701   7
  -2  -2  -2 24450.1 662.143   3
  -2  -2  -2 24089.6 591.062   5
  -2  -2  -1 103555. 2325.34   4
  -2  -2  -1 106633. 2271.71   5
  -2  -2  -1 104869. 2356.33   3
  -2  -2  -1 105129. 2248.59   7
   2   2  -1 108233. 2270.10   6
  -2   2   1 97952.2 2231.45   2
  -2   2   0 1831.76 96.0000   4
   2   2   0 1783.45 93.0457   6
  -2   2   0 1819.94 73.8569   2
  -2  -2   0 1814.24 83.8024   5
  -2  -2   0 1845.94 120.954   4
  -2  -2   0 1782.31 75.6055   7
  -2  -2   1 101865. 2346.13   4
  -2  -2   1 100123. 2249.16   7
  -2   2  -1 104922. 2266.22   4
   2   2   1 106674. 2289.77   6
  -2   2  -1 101306. 2258.93   2
  -2  -2   1 106948. 2259.89   5
  -2   2  -2 23200.8 550.661   4
  -2   2  -2 23490.3 593.253   7
  -2  -2   2 23759.1 649.188   4
   2   2   2 23638.6 642.400   4
   2   2   2 24828.8 598.513   6
  -2  -2   2 24384.4 553.055   5
  -2   2  -2 22825.1 569.782   2
  -2   2  -2 24577.0 603.857   6
  -2  -2   3 11630.0 387.192   4
  -2   2  -3 12387.8 348.809   6
   2   2   3 11690.8 375.311   4
  -2   2  -3 11645.0 334.222   7
  -2   2  -3 10923.9 320.715   2
   2   2   3 12513.5 345.764   6
   2   2   4 3490.79 174.528   4
  -2  -2   4 3560.66 192.356   4
  -2   2  -4 3476.70 96.2008   1
  -2   2  -4 3354.89 140.097   2
  -2   2  -4 3382.14 144.778   7
  -2   2  -4 3382.02 156.140   6
   2   2   4 3482.44 154.238   6
   2   2   5 47921.9 1143.93   4
  -2   2  -5 46658.9 1093.80   2
  -2  -2   5 48789.9 1184.17   4
   2   2   5 47879.5 1111.04   6
  -2   2  -5 48407.1 1114.75   6
   2   2   6 121186. 2642.16   7
   2   2   6 121241. 2701.15   4
   2   2   6 120526. 2672.87   6
  -2   2  -6 117922. 2657.47   2
  -2  -2   6 117143. 2651.50   2
  -2  -2   7 25603.3 655.740   2
   2   2   7 25864.0 693.469   4
   2   2   7 24805.5 643.894   7
   2   2   7 26479.6 675.951   6
  -2   2  -7 25557.3 664.054   2
  -2  -2   8 338726. 7317.76   2
   2   2   8 340133. 7362.13   4
   2   2   8 335221. 7306.95   7
  -2   2  -8 336861. 7340.15   6
  -2   2  -8 345591. 7336.10   2
   2  -2  -8 332958. 7298.15  12
   2   2   9 72021.3 1667.99   4
  -2  -2   9 70888.4 1628.73   2
   2  -2  -9 70628.4 1572.68  15
   2   2   9 69484.7 1590.04  10
   2   2   9 69228.5 1549.54  13
  -2   2  -9 69680.9 1638.49   2
   2   2   9 70621.5 1617.83   7
  -2   2  -9 70084.5 1645.56   6
   2  -2  -9 68965.8 1606.02  12
   2  -2 -10 18351.4 472.407  15
  -2  -2  10 18427.2 526.926   2
   2   2  10 18573.0 516.836   7
  -2   2 -10 19177.1 541.042   2
   2   2  10 17466.7 488.656  10
   2   2  10 17882.8 536.336   6
  -2   2 -10 18385.3 538.966   6
   2   2  10 17707.2 448.476  13
   2   2  11 20866.9 527.317  17
  -2   2 -11 21056.7 607.287   6
   2  -2 -11 21275.2 540.149  15
  -2   2 -11 21180.1 611.476   2
   2   2  11 21410.6 714.870   3
   2   2  11 21805.1 518.329  13
   2   2  11 21096.1 589.678   7
  -2  -2  11 20988.2 604.762   2
   2   2  11 20411.0 620.900   4
   2   2  11 21103.5 561.190  10
   2   2  12 49288.0 1148.27  17
  -2  -2  12 50130.8 1247.14   2
   2   2  12 45769.0 1252.89   4
   2   2  12 49508.4 1186.83  10
  -2   2 -12 50485.1 1251.69   2
   2   2  12 50730.5 1135.86  13
   2   2  12 49545.9 1222.85   7
  -2  -2  12 50634.1 1151.23  23
   2  -2 -12 50680.9 1166.28  15
   2   2  12 50617.4 1387.52   3
  -2   2 -12 49883.7 1239.72   6
   2  -2 -13 96057.7 2132.37   9
   2   2  13 92831.7 2069.72  17
   2   2  13 90562.5 2193.56   4
   2   2  13 93423.4 2053.39  13
  -2  -2  13 90086.0 2184.24   2
   2  -2 -13 91625.5 2119.85  12
  -2  -2  13 91464.4 2072.12  23
   2   2  13 94424.4 2113.74  10
   2   2  14 17333.6 473.683  17
   2  -2 -14 18032.5 525.284   9
   2  -2 -14 17507.3 485.160  11
   2   2  14 17747.6 459.202  13
  -2  -2  14 17893.2 477.630  23
   2  -2 -14 17912.8 520.772  12
   2   2  14 18098.8 514.688  10
   2   2  15 648.667 91.0072  10
   2  -2 -15 872.205 81.8561  11
   2   2  15 693.706 66.5160  16
   2   2  15 802.577 78.7496  17
   2  -2 -15 698.986 88.1622  24
  -2  -2  15 782.072 79.1014  23
   2  -2 -15 722.110 89.9695   9
  -2  -2  15 649.120 72.2723  10
   2  -2 -15 779.709 97.4223  12
   2  -2 -16 10525.3 312.526  18
   2   2  16 11850.5 350.615  17
   2   2  16 11262.1 321.302  16
   2  -2 -16 10925.9 345.126  11
  -2  -2  16 11363.3 354.289  10
   2  -2 -16 11798.2 376.281  24
   2  -2 -16 12095.9 391.473  12
   2  -2 -16 11597.3 391.992   9
  -2  -2  16 11364.3 352.596  23
   2   2  16 12057.9 392.288  10
   2  -2 -17 53549.7 1317.64   9
   2   2  17 52846.7 1262.63  17
   2   2  17 53146.7 1226.77  16
   2  -2 -17 52764.9 1255.48  11
   2   2  17 55024.0 1319.11  10
  -2  -2  17 52599.1 1270.44  10
  -2  -2  17 54019.3 1271.25  23
   2  -2 -17 54369.9 1296.70  24
   2   2  18 15612.2 494.487  10
   2   2  18 15298.6 447.722  17
  -2  -2  18 15944.5 457.019  23
   2   2  18 15127.0 411.265  16
  -2  -2  18 15328.0 454.408  10
   2  -2 -18 14646.0 479.329   9
   2  -2 -18 15205.5 468.995  24
  -2  -2  19 8937.15 313.519  10
   2   2  19 9221.05 353.731  10
   2   2  19 8989.35 276.985  16
  -2  -2  19 8714.52 312.127  23
   2   2  19 8561.64 306.682  17
   2  -2 -19 9062.39 326.930  24
   2  -2 -19 9359.48 345.549   9
   2   2  20 1894.82 109.384  16
   2  -2 -20 1769.75 136.372  24
   2   2  20 2040.73 166.881  10
  -2  -2  20 1862.83 130.599  10
  -2  -2  20 1938.00 137.043  23
   2   2  20 1714.76 136.188  23
   2  -2 -20 1874.26 140.855   9
   2   2  21 14515.1 401.781  16
   2  -2 -21 13714.6 446.705  24
   2   2  21 15260.2 498.004  10
  -2  -2  21 14733.7 451.373  23
   2   2  21 15046.3 461.784  23
   2  -2 -21 13932.5 462.969   9
   2  -2 -22 2549.11 155.693  24
   2   2  22 2346.18 181.084  10
   2   2  22 2377.78 124.634  16
  -2  -2  22 2573.33 157.250  23
   2   2  22 2312.33 159.612  23
   2  -2 -22 2507.27 158.469   9
   2   2  23 17101.1 461.655  16
   2   2  23 17204.4 524.791  23
  -2  -2  23 17902.3 515.258  23
   2  -2 -23 17325.3 507.845  24
   2  -2 -23 16726.8 514.250   9
   2   2  23 18031.7 565.811  10
   2   2  24 8653.40 274.136  16
   2  -2 -24 8926.60 306.580  24
   2   2  24 8863.80 326.054  23
  -2  -2  24 9171.54 318.928  23
   2   2  24 9130.95 359.836  10
  -2  -2  25 2550.62 152.339  23
   2  -2 -25 2476.15 135.825  24
   2   2  25 2522.94 179.012  10
   2   2  25 2718.86 161.580  23
  -2  -2  26 3335.08 168.302  23
   2   2  26 3795.07 205.792  10
   2   2  26 3352.99 175.628  23
  -2  -2  27 20381.2 535.618  23
   2   2  27 21024.5 551.713  23
   2   2  28 7036.07 269.686  10
  -2  -2  28 6958.12 232.402  23
   2   2  28 6939.16 242.712  23
   2   2  29 1028.65 82.0483  23
   2   2  29 979.584 95.9413  10
  -2  -2  29 1000.41 70.8704  23
   2   2  30 2119.50 121.874  10
   2   2  30 2243.94 101.645  23
   2   2  31 1611.60 88.2464  10
   2  -2 -31 1793.13 88.5608  13
   2   3 -30 3173.73 131.625  21
   2   3 -30 3404.83 135.861  13
   2  -3  30 3122.08 124.814  23
   2  -3  30 3135.69 125.341  20
   2   3 -29 4954.49 188.623  21
  -2   3  29 5008.72 167.644  23
   2   3 -29 4401.97 183.491  13
   2  -3  29 4581.28 176.544  23
   2  -3  28 2890.21 158.146  10
   2   3 -28 2863.60 149.243  21
   2   3 -28 2826.78 153.826  13
  -2   3  28 2777.38 132.826  23
   2  -3  28 2789.33 143.033  23
   2   3 -27 5791.35 236.653  13
   2  -3  27 5162.00 216.997  23
  -2   3  27 5582.86 212.770  23
   2  -3  27 5529.21 241.797  10
  -2   3  26 254.953 69.6487  23
   2  -3  26 293.731 76.2370  23
   2  -3  26 237.278 83.1561  10
  -2   3  25 6292.69 249.452  23
   2  -3  25 6429.80 282.659  10
   2  -3  25 6186.59 257.706  23
   2  -3  24 5240.74 256.952  10
   2  -3  24 4861.97 229.129  23
  -2   3  24 4790.13 217.711  23
   2  -3  23 7025.06 315.698  10
   2  -3  23 7344.16 294.905  23
  -2   3  23 7772.85 291.159  23
   2  -3  22 1087.68 121.984  23
   2  -3  22 1088.61 131.329  10
   2  -3  21 28160.2 716.742  16
   2  -3  21 29633.5 803.989  10
   2  -3  21 27318.4 763.475  23
   2  -3  20 5773.62 218.185  16
   2  -3  20 5565.39 271.057  10
   2  -3  20 5824.44 252.433  23
   2  -3  19 3645.55 168.806  16
   2  -3  19 4039.99 219.730  10
   2  -3  19 3772.69 195.917  23
   2  -3  18 4859.53 236.363  10
   2   3 -18 4522.07 187.881  24
   2  -3  18 4948.71 219.450  23
   2   3 -17 10729.2 335.285  24
   2  -3  17 10978.0 384.867  10
   2  -3  17 11329.8 366.303  23
  -2   3  16 9557.86 313.135  17
   2   3 -16 8890.01 291.518  24
   2  -3  16 9180.46 336.454  10
   2  -3  16 8888.49 311.325  23
   2   3 -15 8240.87 253.531  18
  -2   3  15 9020.31 290.430  17
   2   3 -15 8002.13 249.841  11
   2  -3  15 8238.51 305.067  10
   2   3 -15 8149.89 272.750  24
   2  -3  15 8683.24 291.005  23
   2   3 -14 25770.3 619.870  18
   2  -3  14 25015.1 671.818  10
  -2   3  14 24968.3 647.900  17
   2  -3  14 25872.2 655.959  23
   2   3 -14 24631.5 619.649  11
   2  -3  14 25627.5 617.345  16
   2   3 -14 24576.7 639.624  24
   2   3 -13 11817.2 336.393  11
   2  -3  13 12238.3 331.447  16
  -2  -3 -13 11575.5 410.396   1
   2  -3  13 12533.4 378.391  10
   2   3 -13 12086.9 354.586  24
  -2   3  13 12445.0 357.014  17
   2  -3  13 12258.0 361.365  23
   2   3 -13 12166.3 334.913  18
   2   3 -12 3434.23 137.468  18
  -2  -3 -12 3588.75 192.495   1
  -2   3  12 3605.05 150.630  17
   2  -3  12 3495.31 133.163  16
   2  -3  12 3545.30 228.835   3
   2  -3  12 3454.82 124.267  22
   2  -3  12 3382.77 162.783  10
   2   3 -12 3528.85 152.020  24
   2  -3  12 3661.23 155.606  23
   2   3 -12 3325.94 139.174  11
  -2  -3 -11 7342.82 275.644   5
   2   3 -11 7376.72 224.724  18
   2  -3  11 7618.97 217.652  16
   2   3 -11 7352.91 239.350  24
   2  -3  11 7048.45 248.493  10
   2  -3  11 7253.45 204.495  22
  -2  -3 -11 7448.90 295.044   1
   2  -3  11 7314.65 331.077   3
  -2   3  11 7696.14 319.453   1
   2  -3  11 7188.65 237.096  23
   2   3 -11 6873.61 224.322  11
  -2   3  11 7044.28 230.372  17
  -2  -3 -11 6934.55 338.811   2
  -2  -3 -10 30696.8 917.244   2
   2   3 -10 34132.6 762.709  18
  -2   3  10 32990.5 782.441   3
   2  -3  10 32496.5 746.917  16
   2  -3  10 32198.0 732.797  22
   2  -3  10 32629.6 787.358  10
  -2  -3 -10 34543.3 860.732   1
   2   3 -10 32060.6 775.965  24
   2  -3  10 32221.0 896.826   3
  -2   3  10 34450.9 881.566   1
   2  -3  10 31683.2 770.225  23
   2   3 -10 31734.7 766.915  11
  -2   3  10 29880.8 726.918   5
  -2  -3 -10 32614.5 823.699   5
  -2  -3  -9 41623.1 1014.84   1
   2   3  -9 38864.2 927.055  24
   2   3  -9 39285.0 921.358  11
   2  -3   9 38487.6 896.573  16
  -2  -3  -9 39766.7 1041.45   3
  -2   3   9 40904.0 1016.38   1
   2   3  -9 40656.8 913.886  18
   2  -3   9 39107.1 1033.85   3
  -2   3   9 39604.9 917.682   3
  -2   3   9 38966.1 887.645   5
  -2   3   8 23532.4 636.456   1
   2   3  -8 22445.7 559.277  11
   2  -3   8 23041.5 536.663  16
   2   3  -8 22724.1 551.462  18
  -2  -3  -8 21244.2 654.474   3
  -2   3   8 22932.0 540.838   3
   2   3  -8 22399.5 565.032  24
   2  -3   8 22277.1 647.608   3
  -2  -3  -8 23660.0 656.046   1
   2   3  -7 129687. 2746.31  18
  -2   3   7 134016. 2831.86   1
  -2  -3  -7 135517. 2875.19   1
  -2  -3  -7 121503. 2869.43   3
  -2   3   7 118764. 2706.88   3
   2  -3   7 129079. 2848.33   3
  -2  -3  -7 135071. 2804.73   5
  -2   3   6 179079. 3975.53   1
  -2  -3  -6 178881. 4031.98   1
   2  -3   6 184552. 3998.30   3
  -2  -3  -6 174302. 4036.08   3
  -2  -3  -6 184277. 3960.78   5
  -2  -3  -5 228555. 5202.68   3
  -2   3   5 240781. 5132.14   1
  -2  -3  -5 236010. 5117.72   5
   2   3  -5 235609. 5048.64   6
   2  -3   5 233452. 5143.46   3
  -2  -3  -4 38117.9 1005.39   3
  -2   3   4 38628.9 929.007   1
   2  -3   4 38657.2 938.439   3
   2   3  -4 39828.9 881.299   6
  -2  -3  -4 38665.1 924.010   5
  -2  -3  -3 79566.0 1714.94   5
  -2   3   3 75255.1 1710.49   1
   2  -3   3 73278.5 1714.95   3
  -2  -3  -3 76239.7 1806.32   3
   2   3  -3 76582.3 1683.19   6
  -2  -3  -2 13539.0 364.219   5
  -2   3   2 13345.2 358.508   1
   2   3  -2 13828.0 355.899   6
  -2  -3  -2 13607.1 443.498   3
  -2  -3  -1 16579.8 414.473   5
  -2  -3  -1 15693.6 497.229   3
   2   3  -1 16904.4 418.605   6
  -2  -3  -1 16938.7 479.436   4
  -2  -3   0 1026.63 62.2542   5
  -2  -3   0 1094.61 103.311   4
  -2   3   0 1172.02 59.3452   1
  -2  -3   0 991.105 46.9960   7
   2   3   0 1088.95 74.3609   6
  -2   3  -1 15792.9 372.683   2
  -2  -3   1 16695.8 488.506   4
  -2   3  -1 16008.5 381.508   1
  -2  -3   1 16050.0 374.980   7
  -2   3  -1 16431.5 391.887   4
  -2   3  -2 13125.3 306.368   1
  -2  -3   2 13425.2 433.108   4
  -2   3  -2 12811.9 330.394   2
   2   3   2 13472.1 434.639   4
  -2  -3   2 14286.3 320.626   7
  -2  -3   3 76063.2 1791.98   4
  -2   3  -3 71546.6 1670.68   2
   2   3   3 76370.8 1785.04   4
  -2  -3   3 77564.2 1647.07   7
   2   3   3 77893.3 1727.61   6
   2   3   4 37258.9 909.540   6
   2   3   4 37030.1 962.024   4
  -2  -3   4 34865.3 966.833   4
  -2   3  -4 38429.8 868.701   2
  -2   3  -5 236708. 5250.28   6
  -2   3  -5 238926. 5208.40   2
   2   3   5 239968. 5300.20   4
   2   3   5 247443. 5251.78   6
  -2  -3   6 180548. 3994.03   2
   2   3   6 180634. 4002.34   6
   2   3   6 184468. 4051.10   4
   2   3   6 180572. 3957.12   7
  -2   3  -6 182616. 3967.69   2
  -2  -3   7 127543. 2849.63   2
   2  -3  -7 131689. 2782.20  20
  -2   3  -7 129136. 2832.72   2
   2  -3  -7 126658. 2794.99  15
   2   3   7 128144. 2819.48   7
  -2   3  -7 120576. 2818.03   7
   2   3   7 125606. 2776.14  13
   2   3   7 133025. 2868.63   6
   2   3   7 127765. 2900.81   4
   2  -3  -7 126619. 2824.56  12
  -2  -3   8 22276.1 603.574   2
   2  -3  -8 22138.8 553.397  15
   2   3   8 21603.7 642.209   4
   2   3   8 22368.9 581.271   7
  -2   3  -8 24016.8 601.472   2
  -2   3  -8 22875.3 619.082   6
  -2  -3   8 20248.4 675.849   4
   2   3   8 19502.5 599.900   6
   2   3   8 22373.5 535.151  13
  -2   3  -8 21642.9 575.504   7
   2   3   8 22366.2 567.728  10
   2  -3  -8 22380.4 583.393  12
   2  -3  -8 23294.3 564.977  14
   2   3   9 38683.0 901.033  13
   2   3   9 39651.0 1030.18   4
  -2  -3   9 38439.2 980.767   2
  -2   3  -9 40319.4 978.020   2
   2  -3  -9 39672.8 930.058  14
   2  -3  -9 38864.4 923.392  15
   2   3   9 38353.6 956.200   7
   2   3   9 39324.2 940.267  10
  -2   3  -9 37415.6 945.371   7
  -2   3  -9 39072.4 994.730   6
   2   3   9 40620.4 878.516  24
   2   3  10 32856.0 900.828   4
  -2   3 -10 33696.8 856.085   2
   2   3  10 32957.6 770.590  13
  -2  -3  10 32298.1 857.286   2
   2   3  10 32150.5 812.907  10
   2   3  10 32913.0 833.627   7
  -2   3 -10 32765.6 865.440   6
   2   3  10 31795.4 862.716   6
   2   3  10 32381.6 779.851  17
   2   3  10 31366.3 762.867  22
   2   3  10 34798.5 745.560  24
   2  -3 -10 33849.5 796.207  15
   2   3  11 7327.14 193.312  24
   2   3  11 7047.57 311.773   4
   2   3  11 7159.32 228.602  17
  -2   3 -11 7808.82 292.151   2
   2   3  11 7081.49 216.814  13
   2  -3 -11 7255.05 239.375  15
  -2  -3  11 7150.82 289.387   2
   2   3  11 6916.40 265.764   7
   2   3  11 7062.02 213.094  22
   2   3  11 7405.84 294.494   6
   2   3  11 7141.26 255.211  10
  -2   3 -11 6783.55 284.041   6
   2   3  12 3484.66 147.088  17
  -2   3 -12 3471.42 192.266   2
   2   3  12 3382.72 178.301   7
   2  -3 -12 3703.16 160.693  15
   2   3  12 3318.19 133.451  22
  -2  -3  12 3528.72 198.113   2
  -2  -3  12 4160.63 155.103  23
   2   3  12 3760.92 174.719  10
   2  -3 -12 3533.41 178.004  12
   2   3  12 3495.43 138.187  13
   2   3  12 3270.94 207.589   4
   2   3  13 11283.0 442.289   4
   2   3  13 11595.8 345.078  17
   2  -3 -13 12154.9 359.518  15
   2   3  13 12052.5 379.273  10
   2   3  13 12438.1 334.158  13
  -2  -3  13 11699.8 344.842  23
   2   3  13 11661.9 322.731  22
   2  -3 -13 11994.3 386.250  12
   2   3  14 25523.6 684.783  10
   2   3  14 25077.7 613.262  22
   2   3  14 26058.1 629.039  13
  -2  -3  14 24774.4 641.417  23
   2  -3 -14 25792.0 691.429  12
   2   3  14 24773.4 642.054  17
   2   3  15 8911.82 318.976  10
  -2  -3  15 8847.90 286.095  23
   2   3  15 8188.52 265.902  13
   2   3  15 8707.29 258.216  22
   2  -3 -15 8734.52 319.862  12
   2  -3 -15 8460.02 321.382   9
   2   3  15 8295.09 282.013  17
   2  -3 -16 9230.12 340.959   9
   2   3  16 9220.73 303.136  17
   2   3  16 8815.34 269.328  16
   2  -3 -16 8704.06 299.914  11
   2   3  16 9312.40 341.395  10
   2   3  16 9458.64 274.231  22
  -2  -3  16 9242.02 303.118  23
   2  -3 -16 9144.67 337.235  12
   2  -3 -17 11126.4 395.331   9
   2  -3 -17 11684.3 396.116  12
   2   3  17 11099.5 319.581  16
   2  -3 -17 10896.4 349.013  11
   2   3  17 11174.0 392.448  10
   2   3  17 11650.9 358.596  17
  -2  -3  17 11289.8 357.312  23
   2   3  17 11128.5 323.317  22
   2  -3 -18 4573.95 230.940   9
   2   3  18 4661.05 202.946  17
   2   3  18 4310.40 169.895  16
   2  -3 -18 4548.17 190.907  11
   2  -3 -18 4738.02 221.692  24
   2   3  18 4354.48 230.312  10
  -2  -3  18 4878.45 208.894  23
   2   3  18 4673.14 180.320  22
   2  -3 -19 3975.22 212.444   9
   2   3  19 3884.20 223.007  10
   2  -3 -19 3806.54 201.737  24
   2   3  19 3549.61 182.862  17
  -2  -3  19 3968.80 191.328  23
   2   3  19 3949.48 158.133  16
   2   3  20 5446.19 232.308  17
   2   3  20 5600.17 199.612  16
   2  -3 -20 5907.13 254.434  24
   2   3  20 5336.90 270.258  10
  -2  -3  20 5381.27 235.099  23
   2  -3 -20 5680.52 261.719   9
   2   3  21 28413.6 691.871  16
   2   3  21 28342.2 803.364  10
   2  -3 -21 27897.4 760.452  24
  -2  -3  21 28187.6 748.588  23
   2  -3 -21 27386.1 774.425   9
   2   3  22 1043.17 133.958  10
   2   3  22 1051.97 83.0131  16
   2  -3 -22 1055.79 110.963  24
   2   3  22 948.032 111.877  23
  -2  -3  22 1308.96 118.445  23
   2  -3 -22 1110.85 110.083   9
   2   3  23 6844.30 318.235  10
   2  -3 -23 7098.38 279.924  24
   2  -3 -23 7007.67 283.134   9
   2   3  23 7285.14 233.710  16
  -2  -3  23 7181.21 277.680  23
   2   3  23 7203.38 286.895  23
   2   3  24 4668.58 175.061  16
   2   3  24 4848.83 249.111  10
   2  -3 -24 4624.06 211.396  24
  -2  -3  24 5159.23 221.159  23
   2   3  24 4939.26 225.835  23
   2  -3 -24 4713.04 214.812   9
   2   3  25 6483.98 287.025  10
   2   3  25 6359.87 256.999  23
   2  -3 -25 6192.30 238.847  24
  -2  -3  25 6285.91 245.550  23
  -2  -3  26 298.437 65.7946  23
   2   3  26 307.047 73.3104  23
   2   3  26 240.675 89.1673  10
   2  -3 -26 316.721 58.0002  24
   2   3  27 5580.15 244.518  10
  -2  -3  27 5759.70 212.066  23
   2   3  27 5525.15 219.704  23
   2   3  28 2824.86 160.910  10
  -2  -3  28 2848.75 131.879  23
   2   3  28 3063.01 144.809  23
   2   3  29 4441.30 190.647  10
   2   3  29 4820.79 173.057  23
   2   3  30 2848.81 113.637  23
   2   4 -30 1583.87 86.7870  21
   2  -4  30 1454.47 77.0125  23
   2   4 -30 1530.02 82.6704  13
   2  -4  30 1529.41 74.3439  20
   2  -4  29 7551.17 236.301  23
  -2   4  29 7196.05 220.353  23
   2  -4  29 7369.68 230.435  20
   2   4 -29 7607.15 246.211  21
   2   4 -29 7778.66 244.530  13
   2   4 -28 2459.27 133.401  21
   2   4 -28 2659.63 138.379  13
   2  -4  28 2356.96 128.128  23
   2  -4  28 2418.61 125.510  20
  -2   4  28 2425.58 119.331  23
   2   4 -27 1561.20 118.311  21
   2   4 -27 1745.30 124.334  13
   2  -4  27 1688.50 119.490  23
  -2   4  27 1682.86 110.049  23
   2   4 -26 354.897 81.3283  13
   2  -4  26 306.103 78.6519  23
  -2   4  26 224.316 64.4135  23
   2  -4  26 292.486 85.7999  10
   2  -4  25 3922.12 213.247  10
   2  -4  25 3830.96 194.235  23
  -2   4  25 3777.64 183.146  23
   2   4 -25 3654.77 199.703  13
   2  -4  24 22711.8 654.661  10
   2  -4  24 21361.1 624.140  23
  -2   4  24 22611.5 617.753  23
   2  -4  23 9715.96 355.824  23
   2  -4  23 10413.9 385.124  10
   2  -4  22 18915.9 586.601  10
   2  -4  22 18590.8 558.536  23
   2  -4  21 8549.61 339.870  10
   2  -4  21 8393.31 318.578  23
   2   4 -21 7666.44 278.257   8
   2  -4  20 29776.2 846.844  10
   2  -4  20 32043.9 830.061  23
   2  -4  19 59959.4 1458.48  10
   2  -4  19 58292.8 1422.98  23
  -2   4  18 714.252 93.0035  17
   2  -4  18 459.618 98.2541  10
   2  -4  18 524.259 93.9205  23
  -2   4  17 59.2351 57.0208  17
   2  -4  17 53.9956 61.1419  23
   2  -4  17 37.3124 67.1923  10
   2  -4  16 10202.7 313.608  16
  -2   4  16 11267.0 349.836  17
   2  -4  16 10924.6 371.336  10
   2   4 -16 10468.3 319.205  24
   2  -4  16 10322.0 349.336  23
   2   4 -15 4970.05 173.245  11
  -2   4  15 5341.01 210.514  17
   2  -4  15 5046.40 184.947  16
   2  -4  15 5011.34 225.046  10
   2   4 -15 4831.74 188.211  24
   2  -4  15 5150.21 214.787  23
   2  -4  14 14719.4 395.673  16
   2   4 -14 14755.0 411.361  24
   2  -4  14 15190.9 450.770  10
  -2   4  14 15579.6 429.248  17
   2   4 -14 14247.7 390.171  11
   2  -4  14 14630.9 431.067  23
   2   4 -13 22076.4 571.316  11
  -2   4  13 22959.1 598.611  17
   2  -4  13 22722.4 570.172  16
   2  -4  13 23922.7 629.123  10
   2   4 -13 22443.8 587.948  24
   2  -4  13 23525.2 609.631  23
   2   4 -12 7798.59 230.308  18
   2   4 -12 7074.12 225.454  11
  -2   4  12 7409.03 242.449  17
   2  -4  12 7050.86 221.486  16
   2  -4  12 7151.05 258.447  10
   2  -4  12 6766.47 331.300   3
   2   4 -12 7343.23 238.024  24
   2  -4  12 7023.51 245.918  23
  -2  -4 -12 6968.16 304.675   1
   2   4 -11 41222.9 926.678  18
   2   4 -11 38849.6 926.134  11
   2  -4  11 39454.4 916.353  16
   2   4 -11 39096.9 939.421  24
   2  -4  11 39426.0 964.525  10
   2  -4  11 36962.8 1065.86   3
   2  -4  11 40300.1 950.169  23
  -2  -4 -11 39530.9 1042.95   1
  -2   4  11 40539.4 941.794  17
  -2   4  11 41091.8 1080.42   1
   2   4 -10 13157.9 344.631  18
  -2  -4 -10 12207.0 395.628   5
   2   4 -10 12808.4 348.990  11
   2  -4  10 13189.7 334.053  16
   2  -4  10 12991.3 373.783  10
   2  -4  10 11720.3 440.296   3
   2   4 -10 12487.2 354.782  24
   2  -4  10 12524.3 359.367  23
  -2   4  10 12778.8 351.667  17
  -2   4  10 13356.6 454.310   1
  -2  -4 -10 12733.9 439.752   1
  -2   4   9 62268.0 1400.61   5
   2   4  -9 63503.9 1413.46  11
  -2  -4  -9 61521.5 1532.12   1
   2  -4   9 61698.7 1421.19  23
   2  -4   9 62214.5 1432.37  10
   2   4  -9 63256.8 1407.89  18
   2  -4   9 59582.7 1521.74   3
  -2   4   9 64742.9 1534.12   1
   2   4  -9 62741.4 1420.42  24
   2  -4   9 63268.1 1393.49  16
   2   4  -8 18666.4 472.437  24
   2   4  -8 19026.1 461.459  18
   2   4  -8 18026.5 462.731  11
   2  -4   8 18495.5 443.481  16
  -2  -4  -8 16297.5 498.189   5
   2  -4   8 17085.3 539.523   3
  -2   4   8 19112.5 552.460   1
  -2  -4  -8 19564.3 584.557   1
  -2  -4  -7 98389.2 2261.86   1
   2   4  -7 96513.1 2119.43  11
   2   4  -7 97398.7 2126.83  24
  -2  -4  -7 97337.1 2169.48   5
   2  -4   7 97041.9 2206.00   3
   2  -4   7 96988.7 2095.74  16
   2   4  -7 89587.6 2109.50  18
  -2   4   7 101022. 2212.99   1
  -2  -4  -6 7234.91 247.400   5
   2   4  -6 6980.54 214.394  11
   2   4  -6 6694.80 225.884  21
   2  -4   6 6894.80 259.971   3
  -2  -4  -6 7178.29 305.189   1
  -2  -4  -6 6717.45 302.628   3
  -2   4   6 7595.86 270.126   1
   2   4  -6 7411.31 190.986   6
   2   4  -5 20167.2 487.570  18
  -2  -4  -5 19149.1 610.497   3
   2   4  -5 19224.8 491.645  11
   2   4  -5 20772.6 479.717   6
   2  -4   5 19652.9 503.697  20
   2  -4   5 20113.2 539.364   3
  -2   4   5 19814.1 545.494   1
  -2  -4  -5 20862.0 529.284   5
   2   4  -5 19451.3 505.735  21
  -2  -4  -4 8863.29 281.134   5
  -2   4   4 9256.91 297.598   1
   2  -4   4 9603.61 289.096   3
  -2  -4  -4 9037.03 358.226   3
   2   4  -4 9482.55 258.009   6
   2  -4   3 136512. 3042.14   3
  -2   4   3 141278. 3060.90   1
  -2  -4  -3 134638. 3164.22   3
   2   4  -3 141092. 3032.08   6
   2  -4   2 24338.9 588.216   3
  -2  -4  -2 24901.1 721.758   3
   2   4  -2 25337.3 610.707   6
  -2   4   2 25842.5 619.233   1
  -2   4   1 18723.9 472.650   1
   2   4  -1 19075.0 487.191   6
  -2  -4   0 40679.9 990.468   4
  -2   4   0 38249.2 878.308   1
   2   4   0 37795.2 910.384   6
  -2  -4   1 19967.1 568.060   4
  -2   4  -1 18624.6 433.746   4
   2   4   1 18570.1 573.809   4
   2   4   1 19582.9 501.954   6
   2   4   2 24630.4 696.143   4
   2   4   2 25099.3 622.802   6
   2   4   3 139293. 3137.34   4
  -2   4  -3 136280. 2986.92   2
  -2   4  -3 136809. 3048.11   7
   2   4   3 141581. 3057.94   6
   2   4   4 8931.31 344.117   4
  -2   4  -4 8858.51 250.312   2
  -2   4  -4 8713.75 284.886   7
   2   4   4 9016.92 297.888   6
  -2   4  -5 20109.5 499.837   2
   2  -4  -5 19483.3 505.391  14
   2   4   5 19832.9 599.296   4
   2  -4  -5 19790.8 498.397  15
   2   4   5 20320.2 549.277   6
   2   4   5 20177.2 495.772   7
  -2   4  -5 19631.5 527.267   7
   2   4   5 19801.8 486.325  13
   2  -4  -5 18748.6 482.453  20
   2  -4  -5 19592.7 519.853  12
  -2   4  -6 7219.94 226.814   2
   2  -4  -6 6667.75 233.630  12
   2   4   6 7262.04 300.731   4
  -2  -4   6 6081.15 294.802   4
   2  -4  -6 6689.45 215.758  15
  -2   4  -6 6907.95 239.330   7
  -2  -4   6 6425.07 250.296   2
   2   4   6 7091.19 220.434   7
   2  -4  -6 6978.22 205.458  20
   2   4   6 6962.22 205.125  13
  -2  -4   6 6225.06 153.995   7
   2   4   6 6849.61 187.346  24
   2  -4  -6 6783.51 221.873  14
   2   4   6 7058.54 259.608   6
  -2   4  -7 102754. 2197.63   2
  -2  -4   7 97020.5 2325.77   4
   2  -4  -7 98054.4 2168.50  15
   2   4   7 97577.5 2149.69  13
  -2   4  -7 97226.8 2196.43   7
   2   4   7 94270.5 2288.30   4
   2   4   7 99828.2 2184.11   7
   2   4   7 101414. 2241.51   6
   2   4   7 96890.1 2183.65  10
  -2   4  -7 91688.9 2229.98   6
   2  -4  -7 98478.5 2179.38  14
  -2  -4   7 95330.4 2102.02   7
   2  -4  -7 100653. 2153.46  20
   2   4   7 99082.4 2127.42  24
   2  -4  -7 97404.3 2198.30  12
  -2  -4   7 98993.1 2234.82   2
  -2  -4   8 17702.5 527.255   2
  -2   4  -8 18776.4 508.297   2
   2   4   8 16934.4 568.494   4
  -2  -4   8 17843.8 420.435   7
   2  -4  -8 19019.6 484.548  14
   2  -4  -8 18426.6 477.172  15
  -2  -4   8 18554.0 613.627   4
   2   4   8 18933.6 495.327   7
   2   4   8 18391.9 539.009   6
   2   4   8 18621.7 458.359  13
  -2   4  -8 17665.6 495.654   7
   2   4   8 17945.4 491.885  10
  -2   4  -8 18233.0 535.188   6
   2   4   8 18617.2 435.492  24
  -2   4  -9 65607.1 1480.95   2
  -2  -4   9 63290.2 1502.51   2
   2  -4  -9 62586.2 1435.54  14
   2   4   9 62982.7 1563.00   4
   2   4   9 66028.4 1382.24  24
   2  -4  -9 61860.9 1430.94  15
  -2  -4   9 63601.9 1614.75   4
   2   4   9 62740.8 1453.01  10
   2   4   9 62407.7 1455.86   7
   2   4   9 64032.2 1408.28  13
  -2  -4   9 58865.4 1372.98   7
  -2   4  -9 60620.0 1452.41   7
  -2   4  -9 63776.4 1506.89   6
  -2   4 -10 12829.4 405.405   2
   2   4  10 12704.5 464.727   4
   2   4  10 12227.1 350.820  17
  -2  -4  10 12745.7 422.448   2
   2   4  10 13265.6 316.421  24
   2  -4 -10 12678.4 363.066  15
  -2  -4  10 12598.1 499.164   4
   2   4  10 12698.3 341.024  13
  -2   4 -10 12577.8 423.119   6
   2   4  10 12017.6 330.960  22
  -2   4 -10 12202.4 380.240   7
   2  -4 -10 13282.5 366.188  14
   2   4  10 13032.4 384.448  10
   2   4  10 11967.5 381.342   7
  -2   4 -11 40158.9 1015.58   2
  -2  -4  11 40028.0 1035.43   2
   2   4  11 40302.8 1091.57   4
   2   4  11 37813.0 938.939  17
   2   4  11 40678.8 927.887  13
   2  -4 -11 41084.1 955.857  15
  -2  -4  11 37869.8 1127.41   4
   2   4  11 35685.3 976.650   7
  -2  -4  11 39418.8 934.220  23
   2   4  11 42933.1 898.029  24
   2  -4 -11 38926.5 987.314  12
   2   4  11 38004.9 914.960  22
   2   4  11 39777.1 975.801  10
  -2   4 -12 7192.84 290.785   2
   2  -4 -12 7012.07 247.064  15
   2   4  12 7139.44 263.011  10
   2   4  12 6867.85 233.464  17
   2   4  12 6359.64 263.506   7
   2   4  12 7352.01 225.330  13
  -2  -4  12 6824.04 230.756  23
   2   4  12 6733.03 212.971  22
   2  -4 -12 6985.43 270.225  12
   2   4  13 22695.2 569.958  13
   2   4  13 23672.5 627.617  10
   2  -4 -13 23031.4 601.831  15
  -2  -4  13 23276.3 586.759  23
   2  -4 -13 22665.6 634.850  12
   2   4  13 22845.7 587.733  17
   2   4  13 21189.9 555.469  22
   2   4  14 14656.5 418.997  17
   2  -4 -14 15072.4 435.376  15
   2   4  14 14729.6 454.979  10
   2   4  14 14554.8 387.783  22
   2   4  14 14366.8 401.291  13
  -2  -4  14 14932.6 418.875  23
   2  -4 -14 14241.1 458.152  12
   2  -4 -15 5109.36 238.689  12
   2   4  15 5354.49 209.902  17
   2   4  15 4977.70 178.869  22
   2   4  15 4896.90 231.687  10
  -2  -4  15 5213.18 206.367  23
   2   4  15 5123.66 193.782  13
   2   4  16 10054.6 334.703  17
   2   4  16 10151.3 319.879  13
   2   4  16 10782.4 304.287  22
   2  -4 -16 10544.6 373.038  12
  -2  -4  16 10666.6 337.627  23
   2   4  16 10578.6 374.018  10
   2  -4 -17 40.8102 58.7116   9
   2   4  17 4.06700 56.3898  17
   2   4  17 71.2875 46.5658  16
   2  -4 -17 143.923 53.8834  11
  -2  -4  17 28.0918 54.0887  23
   2   4  17 70.0005 55.6163  22
   2   4  17 33.4952 75.2310  10
   2  -4 -17 81.8981 78.3289  12
   2  -4 -18 562.467 94.7042   9
   2   4  18 488.568 80.4636  17
   2   4  18 525.343 64.8945  16
   2  -4 -18 615.376 75.3068  11
   2   4  18 544.200 101.709  10
  -2  -4  18 578.258 85.8070  23
   2  -4 -18 627.436 103.574  12
   2   4  18 534.142 72.7522  22
   2  -4 -19 59169.8 1464.73   9
   2   4  19 59257.0 1412.40  17
   2   4  19 58965.8 1352.54  16
   2  -4 -19 62170.2 1452.82  24
   2   4  19 60183.6 1470.48  10
   2   4  19 59227.9 1364.82  22
  -2  -4  19 57585.8 1409.52  23
   2  -4 -20 30741.4 846.407   9
   2   4  20 30275.4 803.289  17
   2   4  20 31031.5 746.917  16
   2  -4 -20 32158.8 836.694  24
  -2  -4  20 31389.9 807.414  23
   2   4  20 29239.8 850.662  10
   2   4  21 7873.12 299.988  17
   2  -4 -21 8524.96 320.995  24
   2   4  21 7874.11 341.869  10
  -2  -4  21 7998.14 300.393  23
   2   4  21 8586.83 257.180  16
   2  -4 -21 7947.27 325.298   9
   2   4  22 18505.5 542.838  17
   2   4  22 19190.2 489.004  16
   2   4  22 19058.4 598.033  10
  -2  -4  22 19146.3 548.548  23
   2  -4 -22 18610.7 568.651   9
   2  -4 -22 19049.9 564.016  24
   2   4  23 9731.95 289.709  16
   2   4  23 10492.2 396.105  10
   2   4  23 10613.7 360.186  23
   2  -4 -23 9855.68 352.343  24
  -2  -4  23 10449.7 347.217  23
   2  -4 -23 9570.09 352.254   9
   2  -4 -24 22265.4 615.281  24
   2   4  24 22161.3 550.345  16
   2   4  24 22968.3 661.458  10
  -2  -4  24 22820.8 611.315  23
   2   4  24 21736.5 617.061  23
   2  -4 -24 21264.6 614.552   9
  -2  -4  25 3873.17 179.324  23
   2   4  25 3474.28 205.179  10
   2   4  25 3753.67 187.044  23
   2  -4 -25 3454.08 173.603  24
   2  -4 -25 3631.70 172.725   9
   2  -4 -26 279.652 59.4713  24
  -2  -4  26 281.628 65.5260  23
   2   4  26 204.388 67.1539  23
   2   4  26 318.859 89.3151  10
  -2  -4  27 1817.49 108.659  23
   2   4  27 1728.83 114.392  23
   2   4  28 2343.81 122.364  23
  -2  -4  28 2308.53 110.690  23
   2   4  29 7481.44 230.692  23
   2  -5  29 3434.11 128.839  20
   2   5 -29 3745.04 142.497  13
   2  -5  29 3785.99 142.383  23
   2  -5  28 303.439 59.7566  23
   2   5 -28 305.082 60.3273  13
  -2   5  28 281.851 49.0653  23
   2  -5  28 336.944 53.9206  20
   2  -5  27 3704.42 161.378  20
   2  -5  27 3684.43 170.029  23
  -2   5  27 3820.90 161.563  23
   2   5 -27 3781.96 174.691  13
   2   5 -26 3632.03 181.085  13
   2  -5  26 3485.14 174.360  23
  -2   5  26 3404.13 162.619  23
  -2   5  25 2008.46 131.227  23
   2  -5  25 1592.42 128.986  23
   2   5 -25 1776.95 137.432  13
   2  -5  24 18770.9 553.023  23
   2  -5  24 18594.1 576.157  10
   2   5 -24 19287.5 568.526  13
  -2   5  24 19471.2 546.206  23
   2  -5  23 7598.02 317.966  10
   2   5 -23 7407.67 302.897  13
   2  -5  23 7236.54 292.443  23
   2   5 -22 10612.8 383.054  13
   2  -5  22 10422.1 370.063  23
   2  -5  22 10372.4 389.675  10
   2  -5  21 43473.9 1118.28  23
   2  -5  21 45836.9 1152.52  10
   2   5 -21 44144.9 1069.06   8
   2  -5  20 26609.4 737.641  10
   2   5 -20 24843.5 667.805   8
   2  -5  20 25253.3 709.648  23
  -2   5  19 16925.0 499.445  17
   2  -5  19 16854.8 530.968  10
   2   5 -19 15753.1 473.851   8
   2  -5  19 16628.0 506.929  23
  -2   5  18 76407.4 1758.55  17
   2  -5  18 74017.3 1765.70  23
   2  -5  18 74638.0 1792.18  10
  -2   5  17 11661.6 370.227  17
   2  -5  17 10792.6 337.689  16
   2  -5  17 11173.7 395.284  10
   2  -5  17 11368.6 378.530  23
  -2   5  16 13029.5 396.768  17
   2  -5  16 12725.0 367.167  16
   2  -5  16 12393.6 419.294  10
   2  -5  16 12475.1 403.284  23
   2   5 -15 11303.3 318.615  11
  -2   5  15 11865.3 368.411  17
   2  -5  15 11797.4 340.327  16
   2  -5  15 11798.5 393.362  10
   2  -5  15 11952.9 378.689  23
   2   5 -14 1567.01 87.0348  11
  -2   5  14 1372.05 104.392  17
   2   5 -14 1452.66 91.4508  24
   2  -5  14 1346.94 92.3405  16
   2  -5  14 1554.75 124.187  10
   2  -5  14 1693.93 120.466  23
   2   5 -13 9687.81 285.093  11
  -2   5  13 10081.1 315.743  17
   2  -5  13 10314.4 293.122  16
   2  -5  13 10398.0 342.866  10
   2   5 -13 9698.45 296.414  24
   2  -5  13 10077.9 326.543  23
   2   5 -12 7155.89 225.027  11
  -2   5  12 7468.43 249.557  17
   2  -5  12 7246.87 225.289  16
   2  -5  12 7249.41 266.508  10
   2  -5  12 7199.82 255.186  23
   2   5 -12 7223.08 234.065  24
   2  -5  11 17009.2 433.503  16
   2   5 -11 17307.5 441.403  11
   2  -5  11 17007.6 480.514  10
  -2   5  11 17677.8 459.111  17
   2  -5  11 15667.9 556.975   3
   2  -5  11 17173.2 468.703  23
   2   5 -11 16674.9 447.076  24
  -2   5  10 7940.13 250.270  17
   2  -5  10 7799.50 230.891  16
  -2  -5 -10 7415.55 332.014   1
   2  -5  10 8035.40 268.571  10
  -2   5  10 8402.76 356.213   1
   2   5 -10 7836.01 245.821  24
   2  -5  10 7297.66 323.468   3
   2  -5  10 7779.87 259.526  23
   2   5 -10 7811.23 238.699  11
   2   5 -10 8090.30 277.680  13
   2   5 -10 8832.29 248.113  18
  -2   5   9 35005.3 854.120   5
   2   5  -9 36946.2 853.142  11
  -2   5   9 37187.5 857.698  17
   2  -5   9 36259.9 837.606  16
  -2  -5  -9 35199.5 1005.63   3
  -2   5   9 38940.9 1003.05   1
   2  -5   9 36815.6 880.765  10
   2   5  -9 35588.7 857.399  24
   2   5  -9 36793.8 850.835  18
   2  -5   9 36326.8 871.973  23
   2   5  -9 36678.2 892.743  13
  -2  -5  -9 38100.1 1004.15   1
   2  -5   9 32709.1 944.681   3
   2   5  -8 42765.2 931.037  18
   2   5  -8 40664.3 928.908  11
   2  -5   8 40448.5 910.420  16
   2  -5   8 37085.6 1010.76   3
   2  -5   8 39393.0 948.483  10
  -2  -5  -8 42589.9 1092.63   1
  -2   5   8 41346.9 1057.71   1
   2   5  -8 40611.6 966.091  13
   2   5  -8 39583.3 932.795  24
   2  -5   8 39487.5 942.817  23
   2   5  -7 26330.9 659.502  13
   2   5  -7 26033.6 628.609  11
   2  -5   7 26517.8 607.948  16
  -2   5   7 27324.6 738.746   1
   2   5  -7 25309.6 632.697  24
   2  -5   7 25922.9 639.362  23
   2  -5   7 24195.7 693.940   3
   2   5  -7 25851.1 654.514  21
   2   5  -7 26421.5 603.109   6
   2  -5   7 25398.1 647.296  20
  -2  -5  -7 28414.6 787.760   1
   2   5  -6 3264.62 128.312  11
  -2   5   6 3474.95 182.389   1
   2   5  -6 3249.41 143.022  21
  -2  -5  -6 3398.96 211.724   1
   2  -5   6 3206.28 160.183   3
   2   5  -6 3203.79 146.136  13
   2  -5   6 3329.07 142.357  20
   2   5  -6 3325.52 132.253  24
  -2   5   5 13437.0 409.268   1
   2   5  -5 13065.9 328.865  18
   2   5  -5 12171.4 330.400  11
   2   5  -5 12147.1 333.929  24
  -2  -5  -5 11592.4 450.507   1
   2  -5   5 12492.0 346.433  20
   2   5  -5 12312.8 349.053  21
   2   5  -5 11999.2 352.206  13
   2  -5   5 12127.5 366.806   3
   2   5  -4 139215. 2943.26  18
   2   5  -4 135247. 2946.80  11
   2   5  -4 131019. 2949.66  24
   2  -5   4 132285. 2976.02   3
  -2   5   4 142707. 3029.15   1
   2   5  -4 131866. 2970.45  13
   2  -5   4 134803. 2963.92  20
   2   5  -4 136822. 2969.98  21
   2   5  -3 636.348 53.0145  18
   2  -5   3 504.070 61.0372  15
   2   5  -3 522.586 58.5545  21
   2   5  -3 525.932 57.9544   8
   2   5  -3 568.881 63.7554  13
   2  -5   3 598.819 51.6291   3
  -2   5   3 562.073 65.9435   1
   2  -5   3 659.166 64.4427  20
   2   5  -3 597.285 54.0778  24
   2   5  -2 116077. 2492.92  24
  -2   5   2 119174. 2537.78   1
  -2  -5  -2 109130. 2656.55   3
   2  -5   2 111445. 2512.89  15
   2   5  -2 114645. 2510.83   8
   2  -5   2 112621. 2469.22   3
   2   5  -2 111617. 2508.77  21
   2  -5   2 114915. 2505.67  20
  -2   5   1 68598.5 1656.40   1
   2   5  -1 76764.0 1635.65  11
   2   5  -1 74783.8 1637.97  24
   2   5  -1 74446.9 1653.40   8
   2  -5   1 71839.4 1656.81  15
   2   5  -1 74893.1 1654.53  21
   2  -5   1 73555.3 1648.93  20
   2  -5   0 19.7229 42.2419  15
   2  -5   0 34.5779 39.3433  20
   2   5   0 23.8867 30.2011  11
   2   5   0 41.0039 33.7646  24
   2   5   1 76357.4 1661.36  11
   2  -5  -1 74683.8 1687.47  15
   2   5   1 74541.3 1822.11   4
   2  -5  -1 74411.3 1675.13  20
   2  -5  -2 116908. 2570.74  12
   2   5   2 114839. 2693.52   4
   2  -5  -2 113952. 2552.36  15
   2  -5  -2 116794. 2539.02  20
   2  -5  -3 559.726 63.5125  15
   2   5   3 603.349 49.3414  24
   2   5   3 590.983 96.3876   4
   2  -5  -3 577.359 68.9487  12
  -2   5  -3 473.047 64.1610   7
   2  -5  -3 638.670 58.8357  20
  -2  -5   4 135381. 3081.16   4
   2   5   4 134022. 3088.11   4
   2  -5  -4 133055. 2944.29  15
  -2   5  -4 132062. 2980.62   7
   2   5   4 127853. 2929.99  13
   2   5   4 138311. 3000.79   6
   2   5   4 139228. 2911.09  24
   2  -5  -4 131354. 2926.49  20
   2  -5  -4 136414. 2969.68  12
   2   5   5 12391.2 334.994   7
  -2  -5   5 12546.6 455.166   4
   2   5   5 12475.2 454.682   4
   2  -5  -5 12306.4 350.921  15
   2  -5  -5 12753.8 360.806  14
  -2   5  -5 11863.8 371.743   7
   2   5   5 12352.5 338.065  13
   2   5   5 12405.2 360.746  10
   2   5   5 13112.4 319.759  24
   2   5   5 13027.1 399.491   6
   2  -5  -5 12264.9 370.171  12
   2   5   6 3253.90 132.280  13
   2   5   6 3297.40 152.427  10
   2   5   6 3391.27 214.827   4
   2  -5  -6 3553.70 147.548  15
  -2   5  -6 3176.35 157.577   7
   2   5   6 3642.58 121.372  24
   2   5   6 3376.77 137.263   7
   2   5   6 3333.48 134.705  19
   2   5   6 3480.34 180.078   6
   2  -5  -6 3682.36 153.217  14
  -2  -5   6 3421.12 179.237   2
  -2  -5   6 3284.20 212.194   4
   2  -5  -6 3675.50 165.773  12
   2  -5  -7 26100.8 651.612  14
   2   5   7 25956.6 626.145  13
   2   5   7 25700.0 770.619   4
  -2  -5   7 25614.1 779.561   4
   2  -5  -7 26130.3 645.620  15
   2   5   7 26053.4 644.253   7
   2   5   7 26643.5 711.952   6
   2   5   7 25779.9 601.506  24
  -2   5  -7 24935.8 665.637   7
   2   5   7 25556.2 660.742  10
  -2  -5   7 24991.4 703.747   2
  -2   5  -7 26060.9 661.327   2
  -2  -5   8 39856.7 1040.55   2
   2   5   8 41413.4 1046.34   6
   2   5   8 39654.6 1101.87   4
   2   5   8 40143.6 976.905   7
   2  -5  -8 41494.5 976.881  14
  -2  -5   8 39514.1 1122.78   4
   2  -5  -8 41498.7 971.761  15
   2   5   8 42176.8 951.071  13
  -2   5  -8 41262.2 1044.08   6
  -2   5  -8 39176.0 990.371   7
   2   5   8 39506.2 989.131  10
   2   5   8 41388.0 922.198  24
  -2   5  -8 41523.6 1002.03   2
   2  -5  -9 36081.2 882.940  14
   2   5   9 37179.5 1025.58   4
  -2  -5   9 36170.5 1042.66   4
   2  -5  -9 37583.3 883.446  15
   2   5   9 36237.4 826.582  24
  -2  -5   9 35037.9 950.098   2
  -2   5  -9 37446.8 920.627   2
   2   5   9 34874.1 889.183   7
   2   5   9 36917.3 857.523  13
   2   5   9 37554.3 903.155  10
  -2   5  -9 35907.9 901.144   7
  -2   5  -9 36188.3 954.054   6
   2   5  10 7466.04 351.952   4
   2  -5 -10 7721.33 260.884  15
   2  -5 -10 8131.06 261.655  14
   2   5  10 8206.17 217.010  24
   2   5  10 7144.61 267.888   7
   2   5  10 8091.89 280.062  10
   2   5  10 7269.21 227.258  22
   2   5  10 7947.38 241.303  13
  -2  -5  10 7771.72 244.742  23
   2  -5 -10 7342.06 281.213  12
  -2   5 -10 8295.86 299.530   2
   2   5  11 17014.7 440.283  13
   2   5  11 16495.9 452.818  17
   2  -5 -11 16794.3 466.877  15
   2   5  11 16504.4 427.307  22
  -2   5 -11 17406.5 518.769   2
   2   5  11 17379.0 410.753  24
   2  -5 -11 17431.2 464.105  14
   2   5  11 17274.2 489.751  10
  -2  -5  11 16680.6 448.106  23
   2  -5 -11 16528.3 496.257  12
   2   5  12 7036.24 248.067  17
   2   5  12 7415.38 278.990  10
   2  -5 -12 7391.56 263.010  15
   2   5  12 7245.62 235.807  13
  -2  -5  12 7362.68 245.844  23
   2   5  12 7382.37 224.573  22
   2  -5 -12 7752.64 292.795  12
   2   5  13 9869.09 314.541  17
   2  -5 -13 10013.4 326.865  15
   2   5  13 9862.18 297.564  13
   2   5  13 9729.35 342.126  10
  -2  -5  13 10430.8 313.265  23
   2   5  13 9301.88 281.844  22
   2  -5 -13 10053.2 353.301  12
   2   5  14 1516.82 108.425  17
   2  -5 -14 1581.34 122.463  15
   2   5  14 1565.74 103.359  13
  -2  -5  14 1637.77 110.831  23
   2   5  14 1596.91 94.7424  22
   2  -5 -14 1630.97 133.735  12
   2   5  14 1494.26 129.089  10
   2   5  15 11562.7 363.384  17
   2   5  15 11084.9 342.394  13
   2   5  15 11164.3 394.670  10
  -2  -5  15 11635.7 360.716  23
   2  -5 -15 11647.5 403.395  12
   2   5  15 11918.3 326.625  22
   2   5  16 11560.6 377.656  17
   2   5  16 12390.8 420.296  10
  -2  -5  16 12089.0 378.406  23
   2  -5 -16 11839.4 418.086  12
   2   5  16 12909.5 346.498  22
   2   5  16 11841.1 362.303  13
   2  -5 -17 11373.6 400.912  12
   2   5  17 11017.5 364.657  17
   2   5  17 10656.4 314.498  16
   2   5  17 11463.6 326.466  22
  -2  -5  17 11224.4 362.219  23
   2   5  17 11323.0 403.924  10
   2  -5 -18 76331.8 1792.95   9
   2   5  18 73680.3 1729.14  17
   2   5  18 72057.3 1661.86  16
   2  -5 -18 72338.2 1716.92  11
  -2  -5  18 73279.5 1722.66  23
   2   5  18 75648.6 1675.46  22
   2   5  18 76322.7 1787.55  10
   2  -5 -18 74464.8 1775.53  12
   2  -5 -19 16852.7 538.439   9
   2   5  19 16170.3 490.337  17
   2   5  19 16720.1 433.774  16
   2  -5 -19 16660.0 527.290  12
   2  -5 -19 15214.8 466.829  11
   2   5  19 16922.1 448.964  22
   2   5  19 16636.7 538.920  10
  -2  -5  19 16345.5 489.003  23
   2   5  20 25703.2 699.859  17
   2   5  20 25424.4 632.810  16
   2   5  20 25596.2 750.218  10
   2  -5 -20 27957.3 739.312  24
  -2  -5  20 25716.4 696.586  23
   2  -5 -20 25214.1 740.199   9
   2  -5 -21 42891.3 1145.75   9
   2   5  21 42970.4 1105.28  17
   2   5  21 45922.7 1038.21  16
   2   5  21 43623.9 1163.09  10
   2  -5 -21 46113.9 1140.33  24
  -2  -5  21 45470.6 1109.24  23
   2   5  22 9969.05 348.026  17
   2   5  22 10399.2 292.435  16
   2  -5 -22 10450.3 372.511  24
   2   5  22 9618.37 393.905  10
  -2  -5  22 10519.2 351.790  23
   2  -5 -22 9971.80 369.828   9
   2   5  23 7698.32 326.767  10
   2   5  23 7738.18 232.658  16
   2  -5 -23 7643.21 298.441  24
  -2  -5  23 7874.78 288.098  23
   2   5  23 7478.66 293.835  23
   2  -5 -23 7949.48 304.499   9
   2   5  24 19701.0 584.530  10
   2  -5 -24 19102.1 547.511  24
  -2  -5  24 18935.0 532.283  23
   2   5  24 19040.3 544.519  23
   2  -5 -24 18021.5 541.287   9
  -2  -5  25 1802.30 121.219  23
   2  -5 -25 1793.82 123.622  24
   2   5  25 1684.49 151.103  10
   2   5  25 2007.48 133.782  23
   2  -5 -25 1901.06 120.943   9
  -2  -5  26 3453.61 157.708  23
   2  -5 -26 3413.00 160.032  24
   2   5  26 3535.16 169.340  23
  -2  -5  27 3510.94 148.616  23
   2   5  27 3588.77 159.949  23
   2  -5 -27 3583.90 147.722  24
   2   5  28 391.453 58.3167  23
   2   5  29 3647.82 133.774  23
   2  -6  29 4156.17 143.975  23
   2   6 -29 4173.05 153.868  21
   2   6 -28 15972.5 420.323  13
   2  -6  28 16208.0 424.517  23
  -2   6  28 15732.4 408.905  23
   2   6 -28 16344.5 435.410  21
   2  -6  28 15689.3 402.030  20
   2  -6  27 2020.50 118.653  23
   2   6 -27 2123.26 126.394  21
  -2   6  27 1986.09 109.490  23
   2   6 -27 1985.57 115.533  13
   2  -6  27 2047.92 107.235  20
   2   6 -26 1382.88 111.207  21
   2  -6  26 1525.25 102.614  20
  -2   6  26 1511.53 105.723  23
   2   6 -26 1613.57 114.165  13
   2  -6  26 1586.87 114.518  23
   2  -6  25 1434.26 119.996  23
  -2   6  25 1593.64 115.241  23
   2   6 -25 1481.20 120.464  13
   2   6 -25 1419.51 122.712  21
   2  -6  25 1518.06 109.692  20
   2   6 -24 5064.42 228.914  13
   2  -6  24 4937.92 225.635  23
   2   6 -24 5270.73 233.323  21
   2  -6  24 4843.75 210.903  20
   2  -6  23 3564.51 196.959  23
   2   6 -23 3634.14 198.823  13
   2  -6  22 21186.8 611.263  23
   2   6 -22 21196.5 620.369  13
   2  -6  21 253.621 92.9539  23
   2   6 -21 337.007 93.4301  13
   2  -6  21 394.875 102.733  10
  -2   6  20 14910.8 456.420  17
   2  -6  20 14230.4 482.999  10
   2   6 -20 14102.5 423.053   8
   2  -6  20 14659.3 467.269  23
   2   6 -20 14749.4 476.165  13
  -2   6  19 23997.3 654.642  17
   2  -6  19 23696.5 685.987  10
   2   6 -19 23469.9 630.174   8
   2   6 -19 23187.5 674.569  13
   2  -6  19 22930.0 662.620  23
  -2   6  18 21507.9 592.966  17
   2  -6  18 20739.9 622.142  10
   2   6 -18 20377.4 574.356   8
   2  -6  18 20581.1 602.640  23
   2   6 -18 21128.1 617.213  13
  -2   6  17 4334.79 201.136  17
   2  -6  17 4388.78 225.521  10
   2   6 -17 4542.26 226.048  13
   2   6 -17 4202.80 195.316   8
   2  -6  17 3944.63 207.717  23
   2  -6  16 1265.66 118.739  23
  -2   6  16 1445.12 115.955  17
   2  -6  16 1455.66 129.164  10
   2   6 -16 1266.31 107.630   8
   2   6 -16 1411.34 131.494  13
   2  -6  15 27209.8 745.253  10
  -2   6  15 28007.5 713.581  17
   2  -6  15 26754.5 679.123  16
   2  -6  15 27603.1 728.217  23
   2   6 -15 26841.7 737.571  13
   2   6 -15 26491.8 710.676   8
   2   6 -14 4195.42 153.874  11
   2   6 -14 4107.85 190.666   8
  -2   6  14 4301.85 188.662  17
   2  -6  14 4001.37 166.530  16
   2  -6  14 4349.12 207.929  10
   2  -6  14 4203.55 198.576  23
   2   6 -14 4084.58 204.853  13
   2   6 -13 14546.9 385.716  11
  -2   6  13 15447.2 426.934  17
   2  -6  13 14152.8 394.713  16
   2  -6  13 14131.6 444.531  10
   2  -6  13 14499.0 434.565  23
   2   6 -13 14397.6 448.142  13
   2   6 -13 14302.5 429.491   8
   2   6 -12 10347.7 292.039  11
  -2   6  12 10638.7 321.579  17
   2   6 -12 9450.20 325.705   8
   2  -6  12 10373.9 298.623  16
   2   6 -12 10137.3 297.279  24
   2  -6  12 10189.7 341.753  10
   2   6 -12 10114.4 344.073  13
   2  -6  12 10179.6 331.889  23
   2   6 -11 15963.7 411.574  11
  -2   6  11 16472.8 437.809  17
   2   6 -11 15929.5 465.727  13
   2  -6  11 15093.6 407.022  16
   2  -6  11 15778.8 457.458  10
   2   6 -11 15474.9 415.757  24
   2  -6  11 15503.5 448.610  23
   2   6 -11 15158.3 447.862   8
   2   6 -10 43144.7 957.333  11
  -2   6  10 41962.7 973.588  17
   2   6 -10 40383.7 957.053  24
   2  -6  10 39556.3 993.796  10
   2  -6  10 40674.4 949.101  16
   2  -6  10 41079.6 990.295  23
   2   6 -10 40930.2 1006.48  13
   2   6 -10 39582.2 992.503   8
   2   6  -9 5535.95 180.960  11
  -2   6   9 5259.65 278.892   1
  -2   6   9 5118.48 186.419  17
   2  -6   9 5104.19 172.457  16
   2  -6   9 5182.51 200.163  23
   2   6  -9 5368.53 209.282  21
   2   6  -9 5215.28 210.094  13
   2   6  -9 5060.27 202.258   8
   2   6  -9 5051.93 179.908  24
   2  -6   9 5332.98 203.544  20
   2   6  -8 37021.3 877.178  24
   2   6  -8 38779.5 877.302  11
  -2   6   8 38168.9 1028.16   1
   2   6  -8 36343.3 907.375   8
  -2  -6  -8 38073.9 1053.65   1
   2  -6   8 36799.3 899.193  23
   2   6  -8 38432.1 917.860  13
   2   6  -8 38811.9 913.984  21
   2  -6   8 38222.2 906.641  20
   2  -6   8 37515.7 859.698  16
   2   6  -7 1327.16 95.5069   8
   2   6  -7 1361.51 80.5251  11
  -2  -6  -7 1605.06 152.565   1
  -2   6   7 1610.04 139.607   1
   2  -6   7 1217.47 102.658   3
   2  -6   7 1404.41 94.2733  23
  -2  -6  -7 1354.39 143.785   3
   2   6  -7 1405.81 83.5778  24
   2  -6   7 1461.24 72.9267  16
   2   6  -7 1473.46 105.101  13
   2   6  -7 1621.93 102.871  21
   2  -6   7 1592.52 99.6793  20
   2   6  -6 11843.8 319.472  11
   2  -6   6 11652.9 336.671  23
   2  -6   6 12041.3 302.062  16
   2   6  -6 11477.8 345.223   8
  -2   6   6 12156.4 420.273   1
   2   6  -6 11873.9 323.657  24
  -2  -6  -6 11480.0 457.597   1
   2   6  -6 11606.8 345.090  21
   2  -6   6 10881.5 362.708   3
   2   6  -6 12080.1 352.492  13
  -2  -6  -6 11772.2 464.053   3
   2  -6   6 11765.8 341.316  20
  -2  -6  -5 8190.21 373.516   1
   2   6  -5 8645.85 245.458  11
   2   6  -5 8067.22 242.961  24
   2   6  -5 7778.46 262.702   8
   2  -6   5 8102.09 273.379   3
   2  -6   5 8675.75 259.489  23
  -2  -6  -5 7726.07 363.001   3
  -2   6   5 8540.36 322.941   1
   2   6  -5 8284.30 269.972  13
   2   6  -5 8676.46 270.074  21
   2  -6   5 8525.26 262.695  20
   2   6  -4 11758.5 318.157  11
  -2   6   4 12002.0 394.152   1
   2  -6   4 12223.0 338.474  20
   2  -6   4 11819.7 338.158   3
   2  -6   4 11587.3 329.829  23
  -2  -6  -4 10958.0 450.838   3
   2   6  -4 12131.4 345.841  13
   2   6  -4 11881.1 320.452  24
   2   6  -4 11628.7 340.439  21
   2   6  -3 28942.5 671.989  11
   2   6  -3 28514.4 694.564  21
   2  -6   3 27958.6 669.674   3
   2   6  -3 28903.7 701.104  13
   2   6  -3 29092.0 673.640  24
   2  -6   3 28403.1 689.861  20
   2   6  -2 91772.8 1954.75   8
   2   6  -2 89846.1 1925.19  24
   2   6  -2 90073.6 1955.52  13
   2   6  -2 90356.6 1951.12  21
   2  -6   2 90533.8 1945.45  20
   2   6  -1 5782.79 194.386  19
   2   6  -1 5932.27 181.598  11
   2  -6   1 5809.11 194.973  20
   2   6  -1 5729.38 181.277  24
   2   6  -1 5589.21 196.881   8
   2   6  -1 5805.86 198.663  21
   2   6  -1 5490.74 198.534  13
   2   6   0 95.6531 41.9601  19
   2   6   0 117.960 34.8382  11
   2   6   0 12.7417 38.0613   8
  -2   6   0 87.2126 23.0605   4
   2  -6   0 101.267 39.7730  20
   2   6   0 145.886 35.6147  24
   2   6   0 149.847 45.6583  13
   2   6   1 5757.44 179.264  24
   2   6   1 5717.71 198.697  13
   2   6   1 6143.83 199.331   8
   2  -6  -1 5604.95 192.110  20
   2   6   1 5695.74 193.419  19
   2  -6  -2 89559.8 1986.79  20
   2   6   2 89283.9 1966.08  24
   2   6   2 90637.2 1991.66   8
   2   6   2 87513.3 2155.19   4
   2   6   2 88448.3 1992.44  13
   2   6   2 90117.9 1989.39  19
   2   6   3 27204.0 820.536   4
  -2  -6   3 29185.3 809.874   4
   2  -6  -3 29042.1 709.457  12
   2   6   3 28976.1 672.634   8
   2  -6  -3 27813.0 666.759  20
  -2   6  -3 26783.7 716.396   7
   2   6   3 28345.4 671.701  19
   2  -6  -4 12394.6 369.366  12
  -2  -6   4 12350.0 448.329   4
   2   6   4 12113.2 333.243   8
   2   6   4 11617.4 455.213   4
   2   6   4 11769.4 332.948  19
  -2   6  -4 11511.8 369.488   7
   2  -6  -4 11914.9 330.531  20
   2   6   5 8244.29 251.400   8
  -2  -6   5 7714.71 349.597   4
   2   6   5 8437.92 231.048  24
   2   6   5 7914.88 362.117   4
  -2   6  -5 8437.08 290.383   7
   2  -6  -5 8215.75 257.613  23
   2  -6  -5 8513.64 289.264  12
   2  -6  -5 8405.46 252.113  20
   2   6   5 8548.23 257.667  19
  -2  -6   6 11412.0 450.300   4
   2   6   6 12190.6 309.395  24
   2   6   6 11355.6 458.381   4
   2   6   6 11527.9 327.414   7
   2  -6  -6 12432.1 361.596  14
  -2   6  -6 11480.3 368.636   7
   2   6   6 12125.4 366.940  10
   2   6   6 12126.0 401.803   6
   2  -6  -6 12122.0 332.715  20
  -2  -6   6 11813.7 406.295   2
   2   6   6 11894.9 339.418  19
   2   6   7 1662.79 76.3803  24
   2   6   7 1671.14 113.538  10
   2  -6  -7 1402.52 99.5186  14
   2   6   7 1623.67 127.179   6
  -2  -6   7 1267.61 141.680   4
   2   6   7 1486.30 152.975   4
  -2   6  -7 1497.40 106.947   7
   2  -6  -7 1455.45 89.9384  20
   2   6   7 1372.02 87.0390   7
  -2  -6   7 1630.39 128.432   2
   2  -6  -8 37701.5 916.777  14
   2   6   8 40136.4 860.333  24
  -2  -6   8 36421.9 1059.54   4
  -2   6  -8 35323.4 927.335   7
   2   6   8 34987.3 899.220   7
   2   6   8 38144.2 934.843  10
   2   6   9 5501.48 165.370  24
   2  -6  -9 4820.19 221.115  12
  -2  -6   9 5293.89 190.299  23
   2   6   9 5370.51 220.864  10
   2  -6  -9 5013.78 202.667  14
   2   6  10 42410.0 921.624  24
  -2  -6  10 40236.2 959.215  23
   2  -6 -10 42251.0 980.625  14
   2   6  10 41266.7 1008.02  10
   2   6  10 39665.2 931.976  22
   2  -6 -10 41383.1 1019.11  12
   2   6  11 15622.4 410.529  22
   2   6  11 16070.3 478.017  10
   2   6  11 16214.7 397.383  24
   2  -6 -11 15803.7 444.619  14
   2   6  11 15272.8 423.446  13
  -2  -6  11 15566.1 434.898  23
   2  -6 -11 15843.3 486.868  12
   2   6  12 9659.70 315.074  17
   2  -6 -12 9941.13 314.295  14
   2   6  12 9998.92 300.042  13
  -2  -6  12 9865.09 309.459  23
   2   6  12 10101.3 348.635  10
   2   6  12 9450.53 282.086  22
   2  -6 -12 9934.66 353.935  12
   2   6  13 14274.5 381.295  22
   2   6  13 14344.4 456.042  10
   2   6  13 14206.1 420.326  17
   2   6  13 14554.7 402.258  13
  -2  -6  13 13834.9 412.460  23
   2  -6 -13 13896.8 458.133  12
   2   6  14 4267.81 191.943  17
   2   6  14 4003.19 214.795  10
  -2  -6  14 4358.16 190.410  23
   2  -6 -14 4351.53 223.743  12
   2   6  14 4234.63 161.770  22
   2   6  14 4283.08 180.190  13
   2   6  15 27394.9 661.236  22
   2  -6 -15 26729.0 755.790  12
   2   6  15 27338.0 755.184  10
  -2  -6  15 27246.9 706.401  23
   2   6  15 27148.1 713.086  17
   2   6  15 26199.6 686.697  13
   2   6  16 1312.11 92.8697  22
  -2  -6  16 1372.73 111.661  23
   2   6  16 1306.63 105.056  13
   2   6  16 1289.78 135.376  10
   2   6  16 1463.85 117.505  17
   2  -6 -16 1278.85 128.315  12
   2   6  17 4364.61 207.041  17
   2   6  17 4214.75 161.794  16
  -2  -6  17 4485.04 205.002  23
   2   6  17 4516.49 240.528  10
   2  -6 -17 4339.07 231.291  12
   2   6  17 4432.75 173.272  22
   2   6  18 20649.2 585.234  17
   2   6  18 20156.7 517.189  16
   2   6  18 21014.8 632.348  10
  -2  -6  18 20388.7 578.707  23
   2  -6 -18 20915.0 622.595  12
   2   6  19 23799.4 598.315  22
   2  -6 -19 22872.7 694.029   9
   2   6  19 22585.0 648.226  17
   2  -6 -19 24084.9 685.966  12
   2   6  19 24016.0 581.789  16
   2   6  19 23321.0 695.586  10
   2  -6 -19 22915.2 633.451  11
  -2  -6  19 23587.5 647.755  23
   2  -6 -20 14380.8 492.732   9
   2   6  20 14988.3 457.830  17
   2   6  20 14674.1 387.574  16
  -2  -6  20 14481.9 450.691  23
   2   6  20 14814.8 500.648  10
   2  -6 -21 521.702 92.9735   9
   2  -6 -21 568.901 108.794  24
   2   6  21 366.469 49.6709  16
   2   6  21 391.416 118.318  10
  -2  -6  21 320.771 79.0326  23
   2   6  21 347.717 82.2743  17
   2   6  22 21633.1 605.074  17
   2   6  22 21214.6 649.107  10
   2  -6 -22 21754.2 627.695  24
  -2  -6  22 22000.6 602.539  23
   2  -6 -22 20904.3 629.376   9
   2   6  23 3460.72 179.933  17
   2  -6 -23 3757.25 195.191  24
   2   6  23 3149.64 204.020  10
  -2  -6  23 3672.57 181.346  23
   2  -6 -23 3317.70 185.925   9
   2  -6 -24 4602.05 212.793  24
  -2  -6  24 4908.56 205.251  23
   2   6  24 4734.14 212.258  23
   2  -6 -24 4596.93 208.800   9
   2  -6 -25 1543.64 116.383  24
  -2  -6  25 1504.52 108.317  23
   2   6  25 1481.09 114.736  23
   2  -6 -25 1387.00 102.714   9
   2  -6 -26 1421.47 104.206  24
  -2  -6  26 1659.81 102.850  23
   2   6  26 1714.93 110.926  23
   2   6  27 2096.81 114.328  23
   2  -6 -27 2021.34 106.261  24
   2   6  28 16385.0 422.424  23
   2  -7  29 2915.63 114.215  15
   2   7 -29 2835.24 111.049  21
   2  -7  28 186.556 48.8543  15
   2  -7  28 273.522 47.3913  23
   2   7 -28 258.672 48.5135  21
   2   7 -28 182.010 34.4249  13
   2  -7  27 5659.19 199.507  23
   2   7 -27 5395.19 187.711  13
   2   7 -27 5395.47 202.637  21
  -2   7  27 5514.05 187.269  23
   2   7 -26 128.566 52.8834  13
   2  -7  26 92.7922 41.6651  20
   2  -7  26 39.6480 55.1615  23
  -2   7  26 93.1450 49.7780  23
   2   7 -26 103.569 57.3088  21
   2  -7  25 4617.77 182.428  20
  -2   7  25 4827.98 196.481  23
   2   7 -25 4643.67 197.353  13
   2  -7  25 4604.92 202.601  23
   2   7 -25 4960.67 211.610  21
   2  -7  24-52.0899 54.0299  20
   2   7 -24 8.27671 60.4435  13
   2  -7  24 21.2325 66.0698  23
   2   7 -24 67.6077 65.5966  21
   2   7 -23 1911.92 142.693  21
   2  -7  23 1731.23 139.741  23
   2   7 -23 1805.04 136.708  13
   2  -7  23 1837.71 124.907  20
   2   7 -22 32617.5 875.671  21
   2  -7  22 33579.8 871.381  23
   2   7 -22 33043.6 867.224  13
   2  -7  22 33208.0 846.834  20
   2  -7  21 23391.1 650.140  20
   2   7 -21 24268.9 679.804  21
   2  -7  21 23374.7 670.267  23
   2   7 -21 24482.6 675.857  13
   2   7 -20 248.302 57.1839   8
  -2   7  20 217.778 69.0916  17
   2   7 -20 342.958 90.7875  13
   2  -7  20 261.620 89.3535  23
   2  -7  20 286.056 76.3432  20
  -2   7  19 1734.70 133.233  17
   2   7 -19 1843.67 119.208   8
   2   7 -19 1739.10 146.806  13
   2  -7  19 1883.01 151.664  23
   2  -7  19 1861.02 138.555  20
  -2   7  18 7595.04 286.423  17
   2  -7  18 7122.64 298.506  23
   2   7 -18 7603.29 306.081  13
   2   7 -18 6985.10 263.038   8
   2  -7  18 7404.20 286.961  20
  -2   7  17 26777.5 708.280  17
   2   7 -17 26851.0 697.468   8
   2  -7  17 25289.6 722.005  23
   2  -7  17 25977.7 709.064  20
  -2   7  16 5045.80 221.801  17
   2   7 -16 4884.43 214.760   8
   2   7 -16 5041.55 238.559  13
   2  -7  16 5282.41 240.710  23
   2  -7  16 5281.36 229.482  20
  -2   7  15 40583.9 1000.48  17
   2   7 -15 40628.0 1000.42   8
   2  -7  15 39731.1 1017.35  23
   2   7 -15 40577.6 1030.04  13
   2  -7  15 39903.7 1005.42  20
  -2   7  14 19466.6 532.181  17
   2   7 -14 18733.5 534.016   8
   2  -7  14 18537.3 543.581  23
   2   7 -14 18813.6 554.292  13
   2  -7  14 18511.9 535.087  20
   2   7 -13 18477.2 536.441  13
  -2   7  13 18104.7 507.006  17
   2   7 -13 18126.2 517.553   8
   2  -7  13 18166.6 526.320  23
   2   7 -13 18074.8 532.425  21
   2  -7  13 17950.6 517.826  20
  -2   7  12 8927.19 292.343  17
   2   7 -12 9100.40 314.034  21
   2  -7  12 8561.56 298.974  20
   2   7 -12 8248.50 298.029   8
   2  -7  12 8477.43 305.209  23
   2   7 -12 9106.31 318.319  13
  -2   7  11 8896.71 286.577  17
   2   7 -11 8594.36 257.918  24
   2   7 -11 8506.33 298.609   8
   2   7 -11 9022.02 312.024  13
   2  -7  11 8781.60 302.000  23
   2   7 -11 8830.47 305.719  21
   2  -7  11 8543.12 296.397  20
   2   7 -10 8806.15 260.197  11
  -2   7  10 8712.43 275.898  17
   2  -7  10 8348.35 286.742  20
   2   7 -10 8619.84 294.396   8
   2   7 -10 8547.67 294.978  21
   2   7 -10 8264.78 253.067  24
   2   7 -10 8378.30 299.401  13
   2  -7  10 8254.61 289.814  23
   2   7  -9 10081.5 281.931  11
   2   7  -9 9367.00 311.962   8
   2   7  -9 9300.46 273.064  24
   2  -7   9 9306.07 305.301  20
   2  -7   9 9287.06 306.956  23
  -2   7   9 9374.81 290.814  17
   2   7  -9 9478.08 317.765  13
   2   7  -9 9479.94 313.692  21
   2   7  -8 21190.9 532.565  24
  -2   7   8 21883.5 550.626  17
  -2   7   8 20921.1 693.884   1
   2   7  -8 21896.5 578.098   8
   2   7  -8 21175.5 578.055  13
   2  -7   8 20974.6 564.078  20
   2   7  -8 22260.1 539.057  11
   2  -7   8 20697.6 566.428  23
   2   7  -8 21645.8 574.821  21
   2   7  -7 18875.0 469.947  11
   2  -7   7 18177.7 494.227  23
   2   7  -7 18636.9 503.885   8
   2   7  -7 18050.1 499.290  21
   2   7  -7 18542.8 507.207  13
   2  -7   7 18637.6 494.804  20
   2   7  -7 17448.8 461.443  24
   2   7  -6 6313.46 226.068  21
   2   7  -6 6276.85 231.439  13
   2   7  -6 6342.19 203.952  11
   2   7  -6 6218.72 228.997   8
   2  -7   6 6393.26 236.423  15
   2   7  -6 6148.00 198.575  24
   2  -7   6 6414.28 225.031  23
   2  -7   6 6169.49 220.710  20
   2   7  -5 23155.2 546.281  11
   2   7  -5 21682.5 538.935  24
   2   7  -5 21727.2 572.602   8
   2  -7   5 22345.0 582.381  15
   2  -7   5 22133.1 565.360  20
   2  -7   5 21656.5 564.425  23
  -2  -7  -5 19718.2 709.196   3
   2   7  -5 20833.4 571.528  13
   2   7  -5 21851.5 569.710  21
   2   7  -4 24156.3 579.879  11
   2   7  -4 24059.4 605.739  21
   2   7  -4 22985.6 571.523  24
   2  -7   4 23193.1 598.506  23
   2  -7   4 23810.9 615.832  15
   2   7  -4 24189.8 613.005  13
  -2  -7  -4 22730.7 762.328   3
   2  -7   4 23466.5 598.115  20
  -2  -7  -3 29062.6 710.735  23
   2  -7   3 30083.6 736.360  15
   2   7  -3 28791.1 722.349  21
   2  -7   3 29219.8 719.604  23
   2   7  -3 29421.2 729.758  13
  -2  -7  -3 28824.4 894.598   3
   2  -7   3 29106.8 717.012  20
   2   7  -3 29524.3 693.917  24
   2   7  -2 10636.1 318.471  19
   2   7  -2 10777.2 292.904  24
   2   7  -2 10866.6 322.548   8
   2   7  -2 10450.5 318.555  13
   2  -7   2 10771.6 327.608  15
   2  -7   2 10430.9 312.334  23
  -2  -7  -2 10678.6 455.310   3
   2   7  -2 10657.4 318.332  21
   2  -7   2 10843.7 312.991  20
   2   7  -1 59381.8 1370.08  19
   2  -7   1 59857.8 1381.33  15
   2   7  -1 59579.5 1338.23  24
   2  -7   1 60623.5 1368.78  23
   2   7  -1 58776.4 1370.91  13
   2   7  -1 60749.8 1374.71   8
  -2  -7  -1 58044.2 1563.43   3
   2  -7   1 59405.7 1361.87  20
   2   7   0 18036.6 483.270  19
   2   7   0 18580.2 485.856   8
   2  -7   0 18582.8 495.036  15
   2   7   0 18193.0 455.106  24
   2   7   0 18125.9 484.754  13
   2  -7   0 18724.6 485.205  23
   2  -7   0 18290.4 475.707  20
   2  -7  -1 65048.8 1393.96  23
   2   7   1 60500.8 1380.94   8
   2  -7  -1 60004.2 1390.35  15
   2   7   1 58695.6 1378.55  19
   2   7   1 59079.6 1378.31  13
   2  -7  -1 59151.6 1369.54  20
   2   7   1 59838.5 1347.05  24
   2   7   2 10835.9 320.990   8
   2  -7  -2 10746.8 329.653  15
  -2   7  -2 10163.1 353.019   7
   2   7   2 11150.4 294.110  24
   2   7   2 11131.5 321.848  13
   2  -7  -2 10608.3 311.740  20
   2   7   2 10843.0 321.400  19
  -2   7  -3 27812.5 770.853   7
   2   7   3 30291.2 732.358   8
   2  -7  -3 29165.2 740.505  15
   2  -7  -3 29487.1 721.043  20
   2  -7  -3 29889.1 738.184  23
   2   7   3 29974.8 731.022  13
   2   7   3 30134.6 699.769  24
   2   7   3 30196.0 733.483  19
   2  -7  -3 31588.9 774.501  12
  -2  -7   4 24737.2 742.021   4
   2   7   4 23874.4 597.347   8
   2   7   4 22324.2 747.948   4
   2  -7  -4 23656.3 634.522  12
   2  -7  -4 23561.7 608.371  15
  -2   7  -4 21656.9 631.073   7
   2  -7  -4 23639.6 602.013  23
   2   7   4 23459.3 592.903  13
   2   7   4 23707.1 598.610  19
   2  -7  -4 24055.9 588.809  20
  -2   7  -5 20678.1 587.671   7
  -2  -7   5 21916.2 691.119   4
   2  -7  -5 21644.9 563.004  15
   2  -7  -5 21521.5 556.830  23
   2   7   5 21647.2 544.753  13
   2  -7  -5 21948.4 542.202  20
   2   7   5 20996.9 551.006  19
   2  -7  -5 19650.6 579.849  12
  -2  -7   6 6238.55 209.688  23
   2  -7  -6 5871.51 225.343  15
   2   7   6 6247.43 188.401  24
  -2   7  -6 5824.35 239.788   7
   2   7   6 6418.62 213.678  13
   2   7   6 6384.79 244.422  10
   2  -7  -6 6526.93 213.933  20
   2   7   6 6116.44 220.306  19
   2  -7  -7 17451.8 491.402  15
   2   7   7 17767.1 441.424  24
   2   7   7 17512.8 468.846  13
   2  -7  -7 18793.1 503.467  14
  -2  -7   7 17691.6 470.858  23
   2   7   7 18672.6 518.744  10
   2  -7  -8 20514.1 557.527  15
   2   7   8 18851.0 526.238  13
  -2  -7   8 20857.9 538.018  23
   2   7   8 21940.1 588.600  10
   2   7   8 21613.9 506.009  24
   2  -7  -8 21582.4 565.524  14
   2  -7  -8 19438.4 582.614  12
   2  -7  -9 9667.02 342.961  12
   2  -7  -9 8657.76 306.724  15
  -2  -7   9 9443.05 296.481  23
   2   7   9 9607.61 334.521  10
   2   7   9 10121.4 266.728  24
   2  -7  -9 9232.81 310.430  14
   2   7  10 8419.94 240.379  24
   2  -7 -10 8741.67 288.751  14
   2  -7 -10 7684.10 283.583  15
   2   7  10 7992.31 248.571  22
  -2  -7  10 8545.19 275.917  23
   2   7  10 8495.32 311.621  10
   2  -7 -10 8626.80 320.527  12
   2   7  11 8656.45 263.943  22
   2  -7 -11 9220.35 302.208  14
  -2  -7  11 9222.59 295.665  23
   2   7  11 8957.05 330.524  10
   2  -7 -11 9078.82 338.786  12
   2   7  12 8930.05 303.836  17
   2  -7 -12 8562.14 335.056  12
   2   7  12 8980.81 264.074  22
   2  -7 -12 9114.13 299.111  14
   2   7  12 8318.37 325.189  10
  -2  -7  12 8673.56 293.104  23
   2   7  13 17959.9 518.069  17
   2  -7 -13 17771.0 557.921  12
   2   7  13 18685.1 558.437  10
  -2  -7  13 18487.8 511.481  23
   2   7  13 18290.4 469.438  22
   2   7  14 18847.2 533.874  17
   2  -7 -14 18352.8 573.586  12
   2   7  14 18452.6 569.264  10
  -2  -7  14 18851.8 526.079  23
   2   7  14 18660.3 480.949  22
   2   7  15 39508.8 1004.03  17
   2  -7 -15 37569.8 1043.31  12
   2   7  15 41129.1 943.701  22
  -2  -7  15 40919.6 998.556  23
   2   7  15 40381.2 1054.61  10
   2   7  16 5139.43 229.637  17
   2   7  16 5127.29 258.293  10
  -2  -7  16 5192.60 225.341  23
   2   7  16 5120.07 186.880  22
   2  -7 -16 5203.01 255.250  12
   2   7  17 26087.8 707.075  17
   2   7  17 24188.9 672.191  13
   2   7  17 25578.2 632.388  16
   2   7  17 26733.9 756.501  10
   2  -7 -17 26708.9 747.120  12
  -2  -7  17 26572.7 701.085  23
   2   7  17 26782.1 647.205  22
   2   7  18 7574.40 244.128  22
   2   7  18 6864.03 283.730  17
   2   7  18 7293.13 227.566  16
  -2  -7  18 7617.32 286.653  23
   2  -7 -18 7267.47 312.233  12
   2   7  18 7937.53 330.260  10
   2   7  19 1912.34 142.632  17
   2   7  19 1779.60 92.8615  16
   2   7  19 1798.82 164.493  10
  -2  -7  19 1948.19 137.975  23
   2  -7 -19 1733.73 149.754  12
   2  -7 -20 172.285 75.4427   9
   2   7  20 161.274 71.3882  17
   2  -7 -20 290.661 61.3681  11
  -2  -7  20 262.249 73.3168  23
   2   7  20 233.728 103.490  10
   2  -7 -20 246.769 84.6316  12
   2   7  21 23155.3 652.646  17
   2  -7 -21 24049.6 685.830  24
   2  -7 -21 23953.8 695.354   9
  -2  -7  21 23898.0 648.750  23
   2   7  21 23692.8 701.278  10
   2  -7 -22 33531.5 889.227   9
   2   7  22 32949.2 852.149  17
   2  -7 -22 35165.4 887.192  24
  -2  -7  22 33613.5 846.959  23
   2  -7 -23 2124.79 145.501   9
   2   7  23 1763.91 127.428  17
   2  -7 -23 2083.41 146.275  24
  -2  -7  23 2036.91 131.428  23
   2  -7 -24 8.59409 46.0783   9
   2   7  24 54.2348 62.4929  23
  -2  -7  24-10.4832 51.9360  23
   2  -7 -24 17.4684 57.6048  24
   2  -7 -25 4815.91 201.500  24
  -2  -7  25 4786.91 185.103  23
   2   7  25 4738.72 194.922  23
   2  -7 -25 4389.75 188.903   9
   2  -7 -26 129.296 54.2147  24
   2   7  26 64.7453 49.8181  23
  -2  -7  26 126.909 44.9384  23
   2  -7 -27 5477.76 188.540  24
   2   7  27 5462.07 187.370  23
   2   7  28 191.371 36.1101  23
   2   8 -28 11165.0 296.903  21
   2  -8  28 10875.1 298.727  15
   2  -8  27 5394.18 190.108  15
  -2   8  27 5233.80 169.934  23
   2   8 -27 5319.93 186.514  21
   2  -8  27 5329.52 182.853  23
   2  -8  26 12156.7 357.938  15
   2  -8  26 11988.7 348.784  23
   2   8 -26 11965.7 331.170  13
  -2   8  26 12088.0 337.700  23
   2   8 -26 11908.5 352.774  21
   2  -8  25 5097.07 204.528  23
   2   8 -25 5089.48 191.744  13
  -2   8  25 5183.81 196.674  23
   2   8 -25 5078.93 206.060  21
   2  -8  24 2159.50 115.911  20
   2  -8  24 2564.72 149.292  23
   2   8 -24 2496.31 134.441  13
   2   8 -24 2299.60 141.574  21
   2  -8  23 7232.72 277.071  23
   2   8 -23 7256.45 268.601  13
   2   8 -23 7407.82 280.105  21
   2  -8  23 7109.74 247.231  20
   2   8 -22 3564.40 185.003  13
   2  -8  22 3862.82 198.095  23
   2  -8  22 3499.65 168.096  20
   2   8 -22 3882.22 196.882  21
   2  -8  21 15898.0 489.138  23
   2   8 -21 15553.7 475.951  13
   2   8 -21 15939.1 491.150  21
   2  -8  21 15400.7 455.495  20
  -2   8  20 14189.8 426.392  17
   2   8 -20 13347.4 441.795  21
   2  -8  20 13513.2 439.249  23
   2   8 -20 12858.2 428.756  13
   2  -8  20 13084.8 410.997  20
  -2   8  19 2318.46 150.577  17
   2   8 -19 2121.51 125.372   8
   2  -8  19 2252.89 160.938  23
   2   8 -19 2068.25 151.786  13
   2   8 -19 2147.91 157.735  21
   2  -8  19 2108.99 139.890  20
  -2   8  18 461.323 83.8427  17
   2   8 -18 541.084 73.0269   8
   2   8 -18 596.502 96.4524  13
   2  -8  18 582.305 104.284  23
   2   8 -18 661.347 99.9500  21
   2  -8  18 652.721 89.4080  20
  -2   8  17 8938.51 317.853  17
   2   8 -17 8845.88 303.310   8
   2  -8  17 8611.00 331.015  23
   2   8 -17 8482.22 328.171  13
   2  -8  17 8596.05 311.971  20
   2   8 -17 8689.73 333.738  21
  -2   8  16 34196.7 869.505  17
   2   8 -16 33969.8 858.736   8
   2  -8  16 34050.1 892.380  23
   2   8 -16 33245.0 887.745  13
   2   8 -16 33945.9 893.105  21
   2  -8  16 33255.5 864.997  20
   2   8 -15 7964.33 291.249   8
  -2   8  15 8132.55 294.077  17
   2   8 -15 8354.29 316.408  21
   2  -8  15 7858.18 310.563  23
   2   8 -15 8160.56 312.953  13
   2  -8  15 8144.82 297.252  20
  -2   8  14 66398.2 1524.21  17
   2  -8  14 63142.3 1522.67  20
   2   8 -14 64196.4 1525.62   8
   2  -8  14 65920.8 1550.46  23
   2   8 -14 64765.9 1549.06  13
   2   8 -14 64009.7 1547.78  21
  -2   8  13 34985.5 867.215  17
   2   8 -13 35474.0 878.941   8
   2  -8  13 34109.2 890.304  23
   2   8 -13 34172.5 891.092  13
   2   8 -13 34377.6 890.848  21
   2  -8  13 33211.0 869.070  20
  -2   8  12 6862.79 249.724  17
   2   8 -12 6569.19 255.609   8
   2   8 -12 6510.41 264.264  13
   2   8 -12 6643.15 265.103  21
   2  -8  12 6369.45 262.944  23
   2  -8  12 6805.26 256.666  20
  -2   8  11 945.377 88.7077  17
   2  -8  11 857.189 90.3488  20
   2   8 -11 812.292 92.0917  21
   2   8 -11 1022.12 105.534  13
   2  -8  11 833.681 99.4209  23
  -2   8  10 5350.34 206.894  17
   2   8 -10 5118.39 175.287  24
   2   8 -10 5228.65 219.861   8
   2  -8  10 5512.57 226.303  23
   2   8 -10 5297.47 226.496  13
   2  -8  10 5626.40 218.878  20
   2   8 -10 5315.43 222.397  21
  -2   8   9 2948.84 141.545  17
   2  -8   9 2973.40 151.826  20
   2   8  -9 2810.44 119.434  24
   2   8  -9 2792.71 152.946   8
   2  -8   9 2936.17 157.108  23
   2   8  -9 2861.52 154.970  21
   2   8  -9 3184.59 165.238  13
   2  -8   8 18663.3 521.624  23
  -2   8   8 18520.7 499.312  17
   2   8  -8 18758.9 472.394  24
   2   8  -8 18701.1 524.455   8
   2  -8   8 19199.4 537.670  15
   2   8  -8 19063.7 528.289  13
   2   8  -8 18838.7 521.749  21
   2  -8   8 18160.4 510.029  20
   2  -8   7 818.844 86.8761  23
  -2   8   7 777.707 71.7603  17
   2   8  -7 673.094 84.2628  13
   2   8  -7 708.023 59.6273  24
   2   8  -7 661.474 80.8117   8
   2   8  -7 763.277 79.2973  21
   2  -8   7 814.175 81.8316  20
   2  -8   7 603.764 86.9624  15
   2   8  -6 36426.2 845.274  24
   2   8  -6 35188.4 893.709   8
   2  -8   6 36877.5 907.990  15
   2   8  -6 36964.1 893.704  21
   2  -8   6 36129.3 892.510  23
   2   8  -6 36880.4 898.674  13
   2  -8   6 35226.8 879.996  20
   2   8  -5 11187.6 342.478   8
   2   8  -5 10939.6 299.922  24
   2  -8   5 10751.4 346.700  15
   2  -8   5 10354.0 332.261  23
   2   8  -5 10540.7 331.339  21
   2   8  -5 10908.2 339.560  13
   2  -8   5 10732.6 325.965  20
   2   8  -4 633.825 77.0086   8
   2  -8   4 768.659 86.4825  15
   2   8  -4 680.153 59.4745  24
  -2  -8  -4 695.928 75.4561  23
   2   8  -4 709.422 77.6802  13
   2  -8   4 608.969 76.6621  23
   2   8  -4 571.221 68.1833  21
   2  -8   4 652.534 70.3192  20
   2  -8   3 15758.5 441.389  23
  -2  -8  -3 15653.8 434.899  23
   2  -8   3 15627.8 451.031  15
   2   8  -3 15792.7 403.775  24
   2   8  -3 16076.8 439.042  21
   2  -8   3 15788.8 430.676  20
   2   8  -3 15375.5 440.871  13
   2   8  -2 15476.3 441.552  19
   2  -8   2 15550.3 449.287  15
   2   8  -2 15986.9 403.348  24
  -2  -8  -2 15596.9 432.596  23
   2   8  -2 15683.2 438.686  13
   2  -8   2 15520.5 437.958  23
   2  -8   2 15996.3 429.073  20
   2   8  -1 8149.54 274.035  19
   2   8  -1 8280.73 240.609  24
   2   8  -1 8278.20 275.023   8
   2  -8   1 8376.34 283.477  15
  -2  -8  -1 8399.46 269.490  23
   2  -8   1 8548.31 276.579  23
   2   8  -1 8208.92 271.434  13
   2  -8   1 8302.95 262.665  20
   2   8   0 55045.7 1291.91   8
   2  -8   0 53961.0 1273.54  20
   2  -8   0 55104.4 1301.33  15
  -2  -8   0 58327.9 1294.08  23
   2  -8   0 56116.0 1295.56  23
   2   8   0 55128.1 1248.00  24
   2   8   0 54272.4 1285.40  13
   2   8   0 55556.3 1293.04  19
   2   8   1 8298.73 276.554   8
   2  -8  -1 8277.07 263.258  20
   2  -8  -1 8350.21 285.079  15
  -2  -8   1 9104.00 280.359  23
   2   8   1 8404.98 273.213  13
   2   8   1 8310.63 243.714  24
   2   8   1 8229.07 277.721  19
   2  -8  -2 16950.6 465.803  23
   2   8   2 16105.7 450.499   8
   2   8   2 16340.0 412.504  24
   2  -8  -2 16278.0 461.036  15
   2   8   2 16313.1 446.639  13
  -2  -8   2 16596.3 445.068  23
   2   8   2 16249.8 452.322  19
   2  -8  -2 15840.1 436.047  20
   2   8   3 15351.6 441.434   8
   2   8   3 16023.9 437.891  13
   2  -8  -3 15667.6 451.451  15
   2  -8  -3 15877.9 451.636  23
  -2  -8   3 15927.2 433.064  23
   2  -8  -3 15805.9 428.498  20
   2   8   3 16416.3 405.346  24
   2   8   3 15909.3 445.444  19
   2  -8  -3 16424.4 482.447  12
   2   8   4 624.128 75.1559  19
  -2  -8   4 772.652 71.4715  23
   2   8   4 750.979 60.1619  24
   2  -8  -4 570.050 84.3844  12
   2  -8  -4 598.825 78.4467  15
   2  -8  -4 609.425 74.8900  23
   2   8   4 785.973 74.9379  13
   2  -8  -4 706.117 70.2851  20
   2  -8  -5 11344.6 345.885  15
   2   8   5 11080.9 326.675  13
   2  -8  -5 10749.5 341.052  23
  -2  -8   5 10624.8 323.615  23
   2  -8  -5 10842.9 320.021  20
   2   8   5 10765.8 336.075  19
   2  -8  -6 36503.7 904.824  15
   2  -8  -6 37506.1 905.619  23
  -2  -8   6 36138.8 882.076  23
   2   8   6 36705.8 880.080  13
   2   8   6 36381.3 932.416  10
   2   8   6 36390.4 898.065  19
   2   8   7 663.030 80.8597  19
   2  -8  -7 874.600 86.6680  14
   2  -8  -7 602.301 88.1291  15
   2   8   7 763.029 75.7324  13
  -2  -8   7 688.507 72.2014  23
   2   8   7 721.314 97.2176  10
  -2  -8   8 18466.3 506.936  23
   2  -8  -8 18713.9 530.428  14
   2  -8  -8 18602.5 527.154  15
   2   8   8 18858.6 501.356  13
   2   8   8 19565.4 560.044  10
   2   8   8 19255.1 472.296  24
   2  -8  -8 18701.4 563.231  12
   2  -8  -9 3073.14 160.675  14
   2  -8  -9 3111.15 167.293  15
   2   8   9 3016.85 123.035  24
   2   8   9 2926.22 141.315  13
  -2  -8   9 2950.93 147.102  23
   2   8   9 3001.17 178.063  10
   2   8   9 2893.51 126.007  22
   2  -8  -9 2944.04 177.626  12
   2  -8 -10 5483.39 224.414  14
   2  -8 -10 5477.11 229.497  15
  -2  -8  10 5392.90 214.704  23
   2   8  10 5616.36 209.191  13
   2   8  10 5405.85 248.559  10
   2   8  10 5349.73 186.931  22
   2  -8 -10 5764.03 257.840  12
   2  -8 -11 685.838 102.598  12
   2   8  11 829.063 84.2466  13
   2  -8 -11 704.303 95.3492  15
   2  -8 -11 752.266 83.2318  14
  -2  -8  11 840.271 87.3871  23
   2   8  11 747.132 69.6850  22
   2   8  11 861.887 111.585  10
  -2  -8  12 6835.09 251.787  23
   2  -8 -12 6454.28 264.139  15
   2  -8 -12 6563.24 248.284  14
   2   8  12 6329.42 282.477  10
   2   8  12 6520.97 215.036  22
   2  -8 -12 6708.99 290.324  12
   2   8  12 6931.65 240.706  13
   2   8  13 33424.1 857.146  17
   2  -8 -13 33988.4 868.440  15
  -2  -8  13 34671.4 851.556  23
   2   8  13 34464.5 904.487  10
   2  -8 -13 33580.8 902.385  12
   2   8  13 34708.6 795.827  22
   2  -8 -13 34029.0 842.034  14
   2   8  14 62637.9 1527.59  17
   2   8  14 64470.4 1575.86  10
   2  -8 -14 64617.9 1537.48  15
   2   8  14 65261.4 1459.77  22
  -2  -8  14 63578.2 1516.11  23
   2  -8 -14 65971.5 1581.49  12
   2   8  15 7917.44 301.879  17
   2  -8 -15 7991.66 310.903  15
  -2  -8  15 8090.00 296.225  23
   2   8  15 7826.73 332.802  10
   2   8  15 8244.52 252.611  22
   2  -8 -15 8166.55 336.973  12
   2   8  16 31527.6 858.551  17
   2   8  16 33378.1 911.625  10
   2   8  16 33733.3 795.696  22
   2  -8 -16 33531.3 908.141  12
  -2  -8  16 33179.8 854.788  23
   2   8  17 8882.38 325.631  17
   2   8  17 8814.85 360.721  10
  -2  -8  17 8744.23 314.943  23
   2   8  17 8852.27 269.203  22
   2  -8 -17 8328.05 344.819  12
   2   8  18 748.328 102.566  17
   2  -8 -18 643.007 108.533  12
   2   8  18 568.604 69.3293  22
   2   8  18 440.796 109.774  10
   2   8  19 2112.26 150.580  17
   2   8  19 1947.68 172.787  10
  -2  -8  19 2167.39 144.103  23
   2  -8 -19 1927.02 155.239  12
   2  -8 -20 13661.3 441.141  12
   2  -8 -20 13173.9 460.777   9
   2   8  20 12812.5 419.354  17
   2  -8 -20 12814.8 397.111  11
   2   8  20 12402.1 449.599  10
  -2  -8  20 13280.2 412.106  23
   2  -8 -21 15514.3 508.751   9
   2   8  21 15313.4 471.147  17
   2  -8 -21 16727.2 507.632  24
  -2  -8  21 15387.6 462.354  23
   2  -8 -22 3661.56 199.148   9
   2   8  22 3723.72 183.938  17
   2  -8 -22 4129.74 209.018  24
  -2  -8  22 3765.10 179.002  23
   2   8  23 6682.26 255.603  17
  -2  -8  23 7222.88 253.895  23
   2  -8 -23 6477.03 271.017   9
   2   8  24 2287.92 133.165  17
  -2  -8  24 2393.47 127.085  23
   2  -8 -24 2435.11 146.045  24
   2  -8 -24 2317.05 136.834   9
   2  -8 -25 4778.64 198.454  24
  -2  -8  25 4951.16 178.414  23
   2   8  25 5050.67 191.278  23
   2  -8 -25 4680.54 188.330   9
   2  -8 -26 12453.4 352.715  24
   2   8  26 12081.4 340.228  23
   2  -8 -27 5280.67 174.115  24
   2   8  27 4940.89 164.352  23
   2   8  28 7351.18 229.070  10
   2  -9  27 72.3252 33.6064  15
   2   9 -27 65.5935 26.7457  21
   2  -9  26 5186.65 184.028  15
   2  -9  26 5270.18 181.583  23
  -2   9  26 4907.18 166.441  23
   2   9 -26 5048.51 178.132  21
   2  -9  25 11648.9 345.522  15
   2  -9  25 11764.8 341.507  23
   2   9 -25 11204.5 310.971  13
  -2   9  25 11595.6 328.694  23
   2   9 -25 11529.6 338.574  21
   2  -9  24 2936.70 155.783  15
   2   9 -24 3181.37 151.642  21
   2  -9  24 2996.77 152.669  23
   2   9 -24 2881.15 132.189  13
   2   9 -23 7531.46 269.863  21
   2  -9  23 7603.54 278.201  15
   2  -9  23 7356.72 271.881  23
   2   9 -23 7238.45 250.652  13
   2  -9  22 9406.70 328.018  23
   2   9 -22 9568.11 311.544  13
   2   9 -22 9625.94 327.553  21
   2  -9  22 9119.92 285.897  20
   2  -9  21 5009.44 232.491  23
   2   9 -21 5506.81 225.149  13
   2   9 -21 5234.67 229.463  21
   2  -9  21 5086.27 199.791  20
  -2   9  20 11722.9 362.685  17
   2  -9  20 10444.2 336.082  20
   2  -9  20 10832.9 376.791  23
   2   9 -20 10783.6 362.405  13
   2   9 -20 10596.4 369.173  21
  -2   9  19 855.482 96.2285  17
   2  -9  19 802.641 86.1602  20
   2  -9  19 738.817 109.617  23
   2   9 -19 832.991 102.204  13
   2   9 -19 878.515 101.846  21
  -2   9  18 29448.5 735.713  17
   2   9 -18 27688.3 703.458   8
   2   9 -18 26295.7 747.001  21
   2   9 -18 26960.6 737.267  13
   2  -9  18 26359.3 752.650  23
   2  -9  18 26831.9 711.629  20
  -2   9  17 1121.63 108.119  17
   2   9 -17 1123.59 97.9195   8
   2   9 -17 1195.71 116.725  21
   2  -9  17 1169.35 125.822  23
   2   9 -17 1024.83 114.524  13
   2  -9  17 1120.16 102.103  20
  -2   9  16 21861.6 596.643  17
   2   9 -16 21129.7 583.201   8
   2   9 -16 21195.9 611.149  21
   2  -9  16 20804.3 615.711  23
   2   9 -16 21046.3 609.404  13
   2  -9  16 20993.0 583.430  20
   2  -9  15 32580.5 831.382  20
  -2   9  15 33231.1 840.866  17
   2   9 -15 32719.5 834.314   8
   2   9 -15 32601.0 858.958  21
   2  -9  15 31448.4 863.664  23
   2   9 -15 32156.9 854.184  13
  -2   9  14 5746.72 235.849  17
   2   9 -14 5675.20 235.221   8
   2  -9  14 5854.38 234.693  20
   2  -9  14 5698.59 256.068  23
   2   9 -14 5826.93 250.105  13
   2   9 -14 5035.38 239.000  21
   2   9 -13 168.920 65.3441   8
  -2   9  13 128.806 60.5744  17
   2  -9  13 111.024 75.0867  23
   2   9 -13 175.263 71.4454  13
   2  -9  13 159.758 63.0307  20
   2   9 -13 272.180 75.2291  21
  -2   9  12 17994.4 505.259  17
   2   9 -12 17901.8 515.783   8
   2   9 -12 16992.7 521.514  21
   2  -9  12 18063.0 533.945  23
   2   9 -12 17213.7 521.104  13
   2  -9  12 17717.7 504.499  20
  -2   9  11 5413.45 216.881  17
   2   9 -11 5420.44 227.492   8
   2  -9  11 5214.04 242.864  15
   2  -9  11 5231.76 215.866  20
   2  -9  11 5104.16 233.094  23
   2   9 -11 5535.34 235.745  13
   2   9 -11 4855.96 222.180  21
   2   9 -10 25047.5 669.806   8
  -2   9  10 24924.3 651.175  17
   2  -9  10 24327.5 686.350  15
   2  -9  10 23783.0 674.974  23
   2   9 -10 25141.0 676.658  13
   2  -9  10 25562.9 657.134  20
   2   9 -10 25181.7 672.907  21
   2   9  -9 17740.2 457.800  24
  -2   9   9 18958.4 509.491  17
   2   9  -9 18071.5 523.694   8
   2  -9   9 18589.2 542.315  15
   2  -9   9 18489.7 533.558  23
   2   9  -9 19023.3 532.545  13
   2   9  -9 18535.4 525.851  21
   2  -9   9 18695.2 511.678  20
   2  -9   8 13467.2 415.519  23
  -2   9   8 13582.1 389.408  17
   2   9  -8 13584.0 412.075   8
   2   9  -8 12789.3 346.971  24
   2  -9   8 13427.8 393.486  20
   2  -9   8 13074.3 422.006  15
   2   9  -8 13245.0 410.129  13
   2   9  -8 13230.7 405.316  21
  -2   9   7 1699.11 105.180  17
   2   9  -7 1570.90 117.598   8
   2  -9   7 1658.89 129.436  15
   2   9  -7 1566.46 84.9139  24
   2  -9   7 1570.29 120.423  23
   2   9  -7 1678.40 121.980  13
   2  -9   7 1719.39 111.765  20
   2   9  -7 1726.99 117.114  21
   2   9  -6 12232.6 330.186  24
   2   9  -6 12244.8 383.781   8
   2   9  -6 12578.8 376.756  21
   2  -9   6 12126.8 390.871  15
   2  -9   6 12216.2 384.090  23
   2   9  -6 11754.9 375.480  13
   2  -9   6 12289.6 364.965  20
   2  -9   5 1398.98 116.295  15
   2   9  -5 1468.66 112.713   8
   2  -9   5 1556.67 115.243  23
   2   9  -5 1382.59 108.727  13
   2   9  -5 1465.85 82.9291  24
   2   9  -5 1287.69 100.845  21
   2  -9   5 1390.38 99.5394  20
   2   9  -4 3961.80 186.138  19
   2  -9   4 3963.18 183.724  23
   2   9  -4 3861.76 182.692   8
   2   9  -4 3720.43 140.550  24
   2  -9   4 3683.01 163.710  20
   2  -9   4 3826.09 185.549  15
  -2  -9  -4 4018.28 178.707  23
   2   9  -4 3846.19 176.261  13
   2   9  -3 5647.46 228.003  19
   2  -9   3 5708.23 207.881  20
   2  -9   3 5923.31 233.296  15
  -2  -9  -3 5527.36 215.347  23
   2  -9   3 5639.09 224.128  23
   2   9  -3 5777.10 220.576  13
   2   9  -3 5233.31 178.170  24
   2  -9   2 5128.31 195.865  20
   2   9  -2 5239.39 215.830  19
  -2  -9  -2 5267.22 207.230  23
   2  -9   2 5563.94 224.285  15
   2   9  -2 5327.21 173.539  24
   2  -9   2 5108.49 213.755  23
   2   9  -2 4943.98 203.578  13
   2   9  -1 53935.2 1265.80  19
   2   9  -1 54048.5 1203.75  24
   2  -9   1 52796.0 1266.41  23
   2   9  -1 52011.4 1257.75   8
   2  -9   1 52676.1 1266.84  15
  -2  -9  -1 55947.3 1258.78  23
   2   9  -1 52549.6 1249.68  13
   2  -9   1 51189.3 1233.11  20
   2   9   0 43248.8 1057.62   8
   2  -9   0 43224.3 1062.88  15
   2   9   0 43608.3 1000.62  24
   2  -9   0 43336.0 1032.29  20
  -2  -9   0 45528.1 1056.62  23
   2  -9   0 45498.9 1072.07  23
   2   9   0 42861.7 1044.16  13
   2   9   0 42557.5 1056.92  19
   2   9   1 53108.7 1277.14   8
   2   9   1 52857.7 1279.32  19
   2  -9  -1 53047.7 1284.26  15
   2   9   1 52117.4 1220.21  24
   2  -9  -1 59197.7 1308.29  23
  -2  -9   1 61085.6 1301.44  23
   2   9   1 53189.8 1265.87  13
   2  -9  -1 52184.6 1250.02  20
   2   9   2 5276.31 214.571   8
   2   9   2 5415.58 178.200  24
   2  -9  -2 5119.13 217.636  15
   2  -9  -2 5891.36 230.911  23
   2   9   2 5364.12 207.487  13
  -2  -9   2 5463.17 213.698  23
   2  -9  -2 5479.36 200.391  20
   2   9   2 5323.27 217.530  19
   2   9   3 5922.97 185.720  24
   2  -9  -3 5752.46 230.048  15
   2  -9  -3 5782.31 232.022  23
   2   9   3 5628.71 212.683  13
   2  -9  -3 5521.55 205.767  20
  -2  -9   3 6065.09 221.504  23
   2   9   3 5657.36 226.352  19
   2  -9  -3 5261.40 246.236  12
   2  -9  -4 3873.51 183.607  15
   2   9   4 3929.35 142.751  24
   2  -9  -4 3874.89 185.576  23
  -2  -9   4 4093.70 174.958  23
   2   9   4 3824.82 167.140  13
   2  -9  -4 3895.71 163.330  20
   2   9   4 3916.00 183.290  19
   2   9   5 1388.06 111.759  19
   2   9   5 1525.08 86.3460  24
   2  -9  -5 1410.43 113.296  15
   2   9   5 1469.04 101.685  13
  -2  -9   5 1508.72 105.385  23
   2  -9  -5 1330.28 111.423  23
   2  -9  -6 12058.2 384.418  15
   2   9   6 11961.1 328.266  24
  -2  -9   6 12311.9 369.001  23
   2  -9  -6 12663.1 390.751  23
   2   9   6 12191.7 359.939  13
   2   9   6 12555.0 415.137  10
   2   9   6 12443.9 385.136  19
   2  -9  -7 1517.90 120.028  14
   2  -9  -7 1637.34 128.851  15
   2   9   7 1680.66 139.951  10
  -2  -9   7 1543.58 110.501  23
   2   9   7 1853.66 112.206  13
   2  -9  -7 1706.03 139.651  12
   2  -9  -8 13062.3 409.963  15
   2   9   8 13216.3 382.543  13
   2   9   8 13343.9 442.833  10
  -2  -9   8 13399.8 396.975  23
   2  -9  -8 13104.3 412.856  14
   2  -9  -8 12936.5 445.001  12
   2   9   9 18630.8 500.021  13
   2  -9  -9 18897.1 533.100  15
   2  -9  -9 18903.8 571.729  12
  -2  -9   9 18610.0 513.906  23
   2   9   9 17859.0 560.327  10
   2  -9  -9 18784.6 533.087  14
   2   9   9 17605.7 466.975  22
   2  -9 -10 24867.0 677.502  15
   2  -9 -10 25430.9 675.706  14
   2   9  10 24733.0 644.026  13
   2   9  10 25393.3 715.056  10
   2   9  10 24782.1 612.338  22
   2  -9 -10 24969.9 719.993  12
  -2  -9  10 25023.6 661.035  23
   2  -9 -11 5191.40 232.661  15
   2   9  11 5072.51 204.418  13
   2  -9 -11 5140.32 220.657  14
   2   9  11 5195.72 252.945  10
  -2  -9  11 5259.27 219.841  23
   2   9  11 4910.24 177.507  22
   2  -9 -11 5241.79 258.728  12
   2  -9 -12 17978.5 535.396  15
  -2  -9  12 17842.2 518.529  23
   2   9  12 18850.4 503.960  13
   2   9  12 18067.6 568.174  10
   2   9  12 17943.0 466.152  22
   2  -9 -12 17892.5 516.916  14
   2  -9 -12 18593.9 577.372  12
   2  -9 -13 137.909 88.3019  12
   2   9  13 157.067 76.1671  17
   2  -9 -13 172.549 53.2456  14
   2  -9 -13 210.374 89.4344  15
  -2  -9  13 130.637 65.8872  23
   2   9  13 131.206 60.7190  13
   2   9  13 125.126 47.8722  22
   2   9  13 79.9684 82.9402  10
   2   9  14 5719.36 250.042  17
   2   9  14 5978.49 281.493  10
   2  -9 -14 5948.37 257.514  15
   2   9  14 5734.48 193.051  22
   2   9  14 5453.60 224.734  13
  -2  -9  14 5354.12 234.083  23
   2  -9 -14 5468.57 272.414  12
   2   9  15 31902.5 858.167  17
   2   9  15 33190.9 827.589  13
   2   9  15 32818.2 903.320  10
  -2  -9  15 33055.4 848.408  23
   2   9  15 32726.9 781.250  22
   2  -9 -15 32637.3 900.280  12
   2   9  16 20210.5 594.733  17
   2   9  16 20117.5 568.453  13
   2   9  16 20450.4 640.638  10
   2   9  16 21201.1 525.718  22
  -2  -9  16 21687.3 592.167  23
   2  -9 -16 20003.7 628.292  12
   2  -9 -17 1017.75 128.186  12
   2   9  17 1061.75 77.7326  22
   2   9  17 916.323 133.057  10
  -2  -9  17 1076.65 109.196  23
   2   9  17 1098.41 116.305  17
   2   9  18 26932.9 732.508  17
   2   9  18 25955.7 772.525  10
  -2  -9  18 28276.7 726.277  23
   2  -9 -18 26153.6 753.770  12
   2   9  19 870.975 103.589  17
   2  -9 -19 848.247 111.311  12
  -2  -9  19 937.916 102.252  23
   2  -9 -20 10624.7 393.504   9
   2  -9 -20 10360.9 339.926  11
  -2  -9  20 10787.1 349.884  23
   2   9  20 10476.8 361.236  17
   2  -9 -20 10956.7 379.043  12
   2  -9 -21 5121.77 247.885   9
   2   9  21 4794.31 218.868  17
   2  -9 -21 5341.26 247.459  24
  -2  -9  21 5239.59 213.290  23
   2  -9 -22 9110.92 339.893   9
   2   9  22 9476.83 320.120  17
  -2  -9  22 9440.08 307.307  23
   2  -9 -22 9885.01 344.417  24
   2  -9 -23 7405.68 282.768   9
   2   9  23 7512.54 265.176  17
   2  -9 -23 7778.08 285.021  24
  -2  -9  23 7679.70 254.516  23
   2   9  24 2865.87 140.346  17
  -2  -9  24 3086.55 133.267  23
   2  -9 -24 2984.91 154.735  24
   2  -9 -24 2791.77 144.895   9
   2  -9 -25 11768.3 345.858  24
   2   9  25 11998.4 327.981  23
   2  -9 -25 10864.1 327.420   9
   2  -9 -26 5160.62 181.577  24
   2   9  26 5030.99 165.767  23
   2   9  27 48.7759 39.8099  10
   2 -10  26 536.843 49.3055  15
   2 -10  26 627.809 52.9816  23
   2 -10  25 6038.67 203.207  15
   2 -10  25 6212.60 204.182  23
   2  10 -25 6205.38 196.499  21
  -2  10  25 6136.02 193.618  23
   2  10 -24 4644.81 174.618  21
   2 -10  24 4570.97 180.885  15
   2 -10  24 4643.79 182.935  23
   2 -10  23 8156.27 275.967  15
   2 -10  23 8138.31 275.112  23
   2  10 -23 7821.47 262.659  21
   2 -10  22 1273.02 111.250  15
   2 -10  22 1246.73 110.139  23
   2  10 -22 1234.60 88.0738  13
   2  10 -22 1217.39 99.0124  21
   2  10 -21 6670.99 251.905  21
   2 -10  21 6762.02 262.548  15
   2 -10  21 6617.70 262.631  23
   2  10 -21 6504.34 234.945  13
  -2  10  20 1621.36 115.185  17
   2 -10  20 1778.38 140.907  15
   2 -10  20 1606.25 132.448  23
   2  10 -20 1508.23 111.360  13
   2  10 -20 1585.33 120.534  21
  -2  10  19 1295.14 109.292  17
   2 -10  19 1268.84 127.525  15
   2 -10  19 1208.72 127.768  23
   2  10 -19 1315.71 109.419  13
   2  10 -19 1302.37 111.901  21
  -2  10  18 8287.12 286.954  17
   2 -10  18 7106.89 296.878  23
   2  10 -18 7729.87 260.249   8
   2 -10  18 7279.98 255.898  20
   2 -10  18 7674.22 304.539  15
   2  10 -18 7466.27 281.442  13
   2  10 -18 7484.20 289.467  21
  -2  10  17 8724.58 304.532  17
   2  10 -17 8272.28 285.066   8
   2 -10  17 8558.51 331.115  15
   2  10 -17 8146.04 311.564  21
   2 -10  17 8376.68 327.868  23
   2  10 -17 8325.14 306.921  13
   2 -10  17 8381.57 282.132  20
  -2  10  16 8913.22 312.216  17
   2  10 -16 8625.94 301.090   8
   2 -10  16 9062.34 342.333  15
   2 -10  16 8767.42 338.949  23
   2  10 -16 8577.95 316.186  13
   2 -10  16 8782.59 295.515  20
   2  10 -16 8469.77 320.929  21
  -2  10  15 5019.89 216.067  17
   2  10 -15 4531.15 220.037  21
   2  10 -15 4800.18 208.978   8
   2 -10  15 4953.41 238.518  15
   2 -10  15 4624.62 235.659  23
   2  10 -15 4727.81 220.025  13
   2 -10  15 4400.82 195.864  20
  -2  10  14 5214.11 222.699  17
   2  10 -14 5237.43 224.669   8
   2 -10  14 5067.20 248.275  15
   2 -10  14 5340.89 251.496  23
   2  10 -14 5477.42 238.294  13
   2 -10  14 5157.35 212.565  20
   2  10 -14 5227.24 234.327  21
  -2  10  13 43472.9 1048.22  17
   2  10 -13 42149.1 1050.38   8
   2 -10  13 43739.4 1088.33  15
   2 -10  13 41084.0 1077.05  23
   2  10 -13 43060.6 1062.97  13
   2  10 -13 41374.3 1060.52  21
   2 -10  13 41746.4 1031.25  20
  -2  10  12 2150.47 135.975  17
   2  10 -12 2372.38 147.094   8
   2 -10  12 2256.81 164.740  15
   2 -10  12 2270.00 162.892  23
   2  10 -12 2161.91 149.042  13
   2  10 -12 2183.15 145.654  21
   2 -10  12 2371.38 136.834  20
  -2  10  11 30290.3 772.256  17
   2  10 -11 31126.2 793.435   8
   2 -10  11 29469.7 807.547  15
   2 -10  11 30083.8 806.273  23
   2  10 -11 29552.5 788.678  13
   2  10 -11 30277.6 790.836  21
   2 -10  11 29148.3 761.978  20
  -2  10  10 6677.53 248.821  17
   2  10 -10 6717.41 262.832   8
   2 -10  10 6503.75 273.308  15
   2 -10  10 6641.85 273.375  23
   2  10 -10 6024.98 254.057  13
   2  10 -10 6533.71 258.524  21
   2 -10  10 6024.15 236.055  20
   2  10  -9 12679.6 407.291  13
  -2  10   9 13838.1 400.329  17
   2  10  -9 13214.6 416.414   8
   2 -10   9 13141.9 429.831  15
   2 -10   9 12601.2 420.440  23
   2  10  -9 12753.7 405.105  21
   2 -10   9 12976.5 390.867  20
   2  10  -8 27317.7 643.836  24
   2  10  -8 27661.0 727.383   8
   2 -10   8 27472.6 739.144  15
   2 -10   8 27718.1 736.020  23
   2  10  -8 26575.3 716.794  13
   2  10  -8 26808.8 713.355  21
  -2  10   8 27179.6 699.838  17
   2 -10   8 26779.5 694.873  20
  -2  10   7 8479.18 292.522  17
   2  10  -7 9068.76 319.170   8
   2  10  -7 9011.70 308.613  21
   2 -10   7 9150.57 330.431  15
   2  10  -7 9046.91 254.207  24
   2 -10   7 8892.75 323.641  23
   2  10  -7 9227.52 313.780  13
   2 -10   7 8961.87 294.210  20
   2  10  -6 53431.7 1217.22  24
   2  10  -6 53865.1 1296.41   8
   2 -10   6 53484.3 1307.79  15
   2 -10   6 55799.2 1306.96  23
   2  10  -6 54450.4 1287.97  13
   2  10  -6 53842.7 1282.78  21
   2 -10   6 53050.3 1263.66  20
   2  10  -5 9205.98 327.938  19
   2  10  -5 9395.61 320.447   8
   2 -10   5 9365.55 328.761  15
   2 -10   5 9003.92 320.041  23
   2  10  -5 8821.74 256.356  24
   2  10  -5 9231.12 310.124  13
   2 -10   5 8805.46 289.991  20
   2  10  -4 11297.1 375.177  19
   2  10  -4 11045.7 368.322   8
   2 -10   4 10915.9 371.458  15
   2  10  -4 11008.4 307.216  24
   2 -10   4 11849.1 344.763  20
   2 -10   4 11745.7 376.863  23
   2  10  -4 11239.4 357.789  13
   2  10  -3 954.241 102.151   8
   2 -10   3 1230.07 114.431  15
   2 -10   3 1176.08 110.931  23
   2  10  -3 1281.92 105.004  13
   2 -10   3 1222.00 93.0872  20
   2  10  -3 1196.73 75.0429  24
   2  10  -3 1113.18 110.055  19
  -2 -10  -3 1185.49 103.882  23
   2  10  -2 7565.71 280.831  19
   2 -10   2 7140.17 275.628  15
   2  10  -2 7034.51 218.284  24
  -2 -10  -2 7418.02 268.860  23
   2 -10   2 7462.96 280.826  23
   2  10  -2 7338.60 261.955  13
   2 -10   2 7250.49 247.050  20
   2  10  -1 5048.48 171.158  24
   2 -10   1 4953.06 220.949  15
  -2 -10  -1 5295.40 217.742  23
   2 -10   1 5372.71 234.705  23
   2  10  -1 5270.76 210.617  13
   2 -10   1 5041.17 195.044  20
   2  10  -1 5174.95 225.131  19
   2  10   0 5622.10 233.846   8
   2 -10   0 5516.11 234.361  15
  -2 -10   0 6269.39 238.186  23
   2 -10   0 6418.90 262.713  23
   2  10   0 5433.82 216.901  13
   2  10   0 5561.23 184.215  24
   2 -10   0 5581.98 207.891  20
   2  10   0 5254.37 231.695  19
  -2 -10   1 5702.95 226.731  23
   2 -10  -1 4966.78 220.908  15
   2 -10  -1 5628.89 237.776  23
   2 -10  -1 4884.48 192.324  20
   2  10   1 4899.54 170.455  24
   2  10   1 4930.63 202.791  13
   2  10   1 5048.43 222.376  19
   2  10   2 6844.69 220.182  24
   2 -10  -2 7413.77 277.989  15
   2  10   2 7099.76 255.474  13
   2 -10  -2 6955.97 244.359  20
   2  10   2 7200.19 277.034  19
   2 -10  -3 1117.57 109.161  15
   2  10   3 1253.30 79.7366  24
   2 -10  -3 1386.53 119.674  23
  -2 -10   3 1320.59 110.635  23
   2  10   3 1342.43 102.874  13
   2 -10  -3 1119.42 91.0755  20
   2  10   3 1323.81 113.920  19
   2  10   4 12055.9 324.865  24
   2 -10  -4 11636.1 380.368  15
   2 -10  -4 12152.3 390.804  23
   2  10   4 11564.2 354.744  13
  -2 -10   4 11898.5 373.393  23
   2  10   4 11701.3 382.032  19
   2 -10  -5 9662.27 336.215  23
   2 -10  -5 9360.78 327.546  15
   2  10   5 9102.61 300.109  13
  -2 -10   5 9446.38 317.252  23
   2  10   5 9646.42 273.742  24
   2  10   5 9393.65 328.842  19
   2  10   6 52520.5 1209.44  24
  -2 -10   6 54277.1 1267.14  23
   2  10   6 53483.2 1246.98  13
   2 -10  -6 53527.4 1283.23  15
   2  10   6 53218.5 1325.64  10
   2 -10  -6 52852.0 1327.42  12
   2  10   6 51494.2 1280.13  19
   2  10   7 9174.19 272.392  24
   2 -10  -7 9511.54 329.464  15
   2 -10  -7 8928.51 332.403  14
   2  10   7 9500.99 300.868  13
  -2 -10   7 8934.53 310.985  23
   2  10   7 9166.47 358.302  10
   2 -10  -7 9414.04 362.706  12
   2 -10  -8 27149.6 732.628  14
   2 -10  -8 27426.2 727.898  15
  -2 -10   8 27561.8 713.807  23
   2  10   8 27769.8 771.792  10
   2  10   8 26105.7 653.472  22
   2  10   8 27810.4 694.358  13
   2 -10  -8 26568.4 769.538  12
   2 -10  -9 12931.0 416.593  14
  -2 -10   9 12963.8 402.924  23
   2 -10  -9 13177.0 418.170  15
   2  10   9 12893.9 454.178  10
   2  10   9 12782.0 350.594  22
   2  10   9 12998.2 386.820  13
   2 -10  -9 12875.9 452.855  12
   2 -10 -10 6128.12 257.118  14
   2 -10 -10 6623.10 268.726  15
   2  10  10 6622.04 242.185  13
  -2 -10  10 6424.00 253.774  23
   2  10  10 6851.59 300.866  10
   2  10  10 6384.51 208.461  22
   2 -10 -10 6514.22 296.619  12
   2 -10 -11 29680.6 782.221  14
   2 -10 -11 30119.2 794.768  15
   2  10  11 28917.5 710.596  22
   2  10  11 30414.1 759.690  13
  -2 -10  11 30268.4 780.166  23
   2  10  11 29990.9 837.200  10
   2 -10 -11 30197.0 840.883  12
   2 -10 -12 2521.48 164.063  15
   2  10  12 2189.86 136.246  13
  -2 -10  12 2400.15 149.653  23
   2  10  12 2224.53 176.226  10
   2  10  12 2244.96 107.532  22
   2 -10 -12 2136.32 137.102  14
   2 -10 -12 2173.36 174.107  12
   2 -10 -13 42664.0 1126.01  12
   2  10  13 43444.2 992.729  22
   2  10  13 42415.5 1079.90  17
   2 -10 -13 41312.8 1048.12  14
  -2 -10  13 43198.5 1066.50  23
   2 -10 -13 42594.5 1082.06  15
   2  10  13 43873.9 1045.16  13
   2  10  13 43523.2 1127.10  10
  -2 -10  14 5138.78 229.553  23
   2 -10 -14 5182.17 241.896  15
   2  10  14 5287.79 244.321  17
   2  10  14 5405.91 221.398  13
   2  10  14 5521.23 278.457  10
   2  10  14 5600.85 183.843  22
   2 -10 -14 5260.38 266.353  12
   2  10  15 4667.37 229.564  17
   2  10  15 4751.86 256.875  10
  -2 -10  15 4858.18 221.429  23
   2  10  15 4968.69 209.091  13
   2  10  15 4847.44 170.507  22
   2 -10 -15 4644.85 247.713  12
   2  10  16 9212.70 336.364  17
   2  10  16 8640.78 304.286  13
  -2 -10  16 9023.00 320.262  23
   2  10  16 8440.19 358.386  10
   2  10  16 8852.27 260.194  22
   2 -10 -16 8861.54 357.723  12
   2  10  17 9006.42 328.395  17
  -2 -10  17 8518.19 308.888  23
   2 -10 -17 8351.41 338.425  12
  -2 -10  18 7364.69 276.064  23
   2  10  18 7501.51 291.080  17
   2 -10 -18 7473.64 306.481  12
   2  10  19 1314.07 120.610  17
  -2 -10  19 1366.17 110.978  23
   2 -10 -19 1431.66 128.733  12
   2 -10 -20 1821.77 146.440   9
   2  10  20 1495.50 123.513  17
   2 -10 -20 1377.95 103.086  11
  -2 -10  20 1549.26 115.045  23
   2 -10 -20 1561.83 125.292  12
   2 -10 -21 6270.97 270.229   9
   2  10  21 6110.48 245.277  17
   2 -10 -21 6763.75 271.380  24
  -2 -10  21 6311.69 232.557  23
   2 -10 -22 1205.64 107.806   9
   2  10  22 1288.59 103.323  17
   2 -10 -22 1308.44 117.101  24
  -2 -10  22 1210.26 91.6353  23
   2  10  23 8143.60 265.736  17
   2 -10 -23 8178.69 284.672  24
   2 -10 -23 7744.41 278.103   9
   2 -10 -24 4718.47 189.687  24
   2  10  24 4605.42 167.976  23
   2 -10 -24 4403.34 176.587   9
   2 -10 -25 5639.89 187.235   9
   2  10  25 5420.05 209.626  10
   2 -10 -25 6433.21 209.277  24
   2  10  25 6283.41 186.829  23
   2 -10 -26 686.401 56.6539  24
   2  10  26 500.352 58.1638  10
   2  11 -25 4143.88 149.879  19
   2  11 -24 629.365 67.9104  19
   2 -11  24 606.893 57.6871  15
   2 -11  24 556.506 60.2523  23
   2 -11  23 15410.1 415.697  15
   2  11 -23 14919.9 399.824  21
   2 -11  23 15849.4 422.698  23
   2 -11  22 1896.63 117.101  15
   2 -11  22 1865.87 118.516  23
   2  11 -22 2063.23 109.031  21
   2 -11  21 9206.73 300.922  15
   2  11 -21 8690.25 282.232  21
   2 -11  21 8762.50 301.445  23
  -2  11  20 1949.97 115.281  17
   2 -11  20 1680.05 130.329  23
   2 -11  20 1995.29 133.641  15
   2  11 -20 2037.73 123.583  21
   2  11 -20 1933.42 107.196  13
  -2  11  19 590.773 75.0669  17
   2 -11  19 673.531 92.5655  15
   2 -11  19 556.942 92.4498  23
   2  11 -19 549.957 68.3578  13
   2  11 -19 571.435 77.7860  21
  -2  11  18 697.909 84.6141  17
   2 -11  18 695.619 96.4171  15
   2 -11  18 568.183 98.9634  23
   2  11 -18 686.344 78.0419  13
   2  11 -18 691.938 85.9227  21
  -2  11  17 1654.74 119.268  17
   2 -11  17 1655.24 138.226  15
   2 -11  17 1686.60 144.032  23
   2  11 -17 1589.17 115.456  13
   2  11 -17 1674.00 122.243  21
  -2  11  16 10568.6 339.650  17
   2  11 -16 9620.39 323.164   8
   2 -11  16 10172.6 362.668  15
   2 -11  16 10297.3 367.402  23
   2  11 -16 10037.1 334.455  13
   2  11 -16 10101.6 343.968  21
  -2  11  15 3296.22 169.066  17
   2  11 -15 3203.13 163.231   8
   2 -11  15 2763.49 178.496  15
   2  11 -15 2931.29 166.724  21
   2  11 -15 3070.33 165.331  13
   2 -11  15 3206.40 190.855  23
  -2  11  14 1228.81 107.169  17
   2  11 -14 1147.16 104.689   8
   2  11 -14 984.419 102.508  13
   2 -11  14 933.838 121.381  23
   2 -11  14 1157.24 122.058  15
   2  11 -14 1016.80 102.152  21
  -2  11  13 8056.88 286.368  17
   2  11 -13 8039.82 292.308   8
   2  11 -13 7710.21 292.361  21
   2 -11  13 7935.72 312.761  15
   2 -11  13 7551.48 313.227  23
   2  11 -13 8048.56 291.057  13
   2 -11  13 7345.91 260.944  20
  -2  11  12 29834.2 763.999  17
   2  11 -12 29360.4 774.693   8
   2  11 -12 29736.5 774.072  21
   2 -11  12 29121.3 799.263  15
   2 -11  12 30191.2 803.614  23
   2  11 -12 29198.8 769.231  13
   2 -11  12 28390.0 735.909  20
   2  11 -11 17621.1 510.757  21
  -2  11  11 18336.8 506.889  17
   2  11 -11 18131.2 520.836   8
   2  11 -11 16399.5 502.824  13
   2 -11  11 17793.3 536.648  15
   2 -11  11 17698.8 540.986  23
   2 -11  11 16639.9 478.302  20
   2  11 -10 6609.05 258.147  21
  -2  11  10 6438.59 248.867  17
   2 -11  10 6414.31 236.170  20
   2 -11  10 6464.98 279.669  15
   2 -11  10 6720.37 282.007  23
   2  11 -10 6689.42 269.413   8
   2  11 -10 6527.89 256.844  13
  -2  11   9 45696.9 1092.54  17
   2  11  -9 44881.0 1116.42   8
   2  11  -9 44889.5 1101.84  21
   2 -11   9 45219.5 1133.03  15
   2 -11   9 44930.1 1134.11  23
   2 -11   9 44517.5 1073.47  20
   2  11  -9 44466.3 1101.48  13
   2  11  -8 35722.9 936.670  19
  -2  11   8 35146.4 886.151  17
   2  11  -8 35539.4 916.963   8
   2 -11   8 36155.8 929.741  15
   2 -11   8 35823.3 931.298  23
   2  11  -8 36049.9 902.222  13
   2 -11   8 35090.7 873.101  20
   2  11  -7 6424.36 279.326  19
  -2  11   7 6369.01 239.527  17
   2  11  -7 6391.26 262.365   8
   2  11  -7 6312.58 192.936  24
   2 -11   7 6599.78 273.360  15
   2 -11   7 6640.34 274.677  23
   2  11  -7 6373.63 249.874  13
   2 -11   7 6158.86 228.919  20
   2  11  -6 18824.8 559.001  19
   2  11  -6 18537.6 544.303   8
   2 -11   6 18385.5 553.905  23
   2 -11   6 18445.4 551.248  15
   2  11  -6 19002.0 462.063  24
   2  11  -6 18595.0 527.318  13
   2 -11   6 18306.6 503.839  20
   2  11  -5 60951.8 1482.65   8
   2 -11   5 62200.6 1434.53  20
   2 -11   5 61444.8 1485.50  15
   2  11  -5 61091.6 1493.22  19
   2  11  -5 63205.0 1461.79  13
   2  11  -5 61822.6 1388.88  24
   2 -11   5 62873.3 1496.11  23
   2  11  -4 18505.1 543.789  19
   2  11  -4 17912.4 534.347   8
   2 -11   4 17923.2 534.046  15
   2  11  -4 17917.1 453.218  24
   2 -11   4 18874.5 546.184  23
   2  11  -4 18095.9 512.975  13
   2 -11   4 17884.9 490.143  20
   2  11  -3 7675.05 295.751   8
   2 -11   3 8266.83 312.963  23
   2 -11   3 8022.24 302.212  15
   2  11  -3 7592.44 231.482  24
  -2 -11  -3 7893.24 293.820  23
   2  11  -3 8319.64 284.957  13
   2 -11   3 7915.91 264.014  20
   2  11  -3 8063.75 307.172  19
   2 -11   2 3100.62 178.771  15
   2 -11   2 3124.01 147.508  20
  -2 -11  -2 3391.16 176.600  23
   2 -11   2 3769.46 199.551  23
   2  11  -2 3138.10 162.838  13
   2  11  -2 3113.88 126.274  24
   2  11  -2 3034.29 182.199  19
   2  11  -1 3753.08 144.311  24
   2 -11   1 3792.31 194.818  15
   2 -11   1 4267.49 222.506  23
  -2 -11  -1 3746.01 189.227  23
   2  11  -1 3875.47 179.555  13
   2 -11   1 3763.94 163.842  20
   2  11  -1 3847.00 199.870  19
   2 -11   0 1441.51 125.896  15
  -2 -11   0 1339.26 115.252  23
   2 -11   0 1661.27 139.256  23
   2  11   0 1363.12 106.678  13
   2  11   0 1438.52 84.0857  24
   2 -11   0 1472.53 100.039  20
   2  11   0 1362.11 126.068  19
   2 -11  -1 3639.80 191.823  15
   2  11   1 3729.61 145.759  24
   2 -11  -1 3984.34 207.215  23
  -2 -11   1 3863.62 192.403  23
   2  11   1 3839.39 174.490  13
   2 -11  -1 3893.94 166.430  20
   2  11   1 3872.37 200.364  19
   2 -11  -2 3176.72 178.530  15
   2 -11  -2 3331.56 152.850  20
  -2 -11   2 3771.74 190.065  23
   2  11   2 3118.90 133.534  24
   2 -11  -2 3311.39 188.907  23
   2  11   2 3211.43 159.089  13
   2  11   2 3243.11 184.745  19
   2  11   3 8190.04 246.904  24
   2 -11  -3 7814.19 299.192  15
   2  11   3 7805.86 275.799  13
   2 -11  -3 8124.98 313.405  23
   2  11   3 7740.06 304.013  19
   2  11   4 18368.1 472.816  24
   2 -11  -4 18324.4 537.841  15
   2 -11  -4 17952.0 548.186  23
   2  11   4 18832.4 546.354  19
   2  11   4 17889.7 504.367  13
  -2 -11   4 19445.6 544.088  23
   2 -11  -5 61456.9 1554.83  12
   2 -11  -5 63376.9 1517.61  23
   2 -11  -5 62420.0 1501.01  15
   2  11   5 62714.0 1426.87  24
  -2 -11   5 65732.0 1501.82  23
   2  11   5 62711.7 1551.43  10
   2  11   5 62406.7 1464.00  13
   2  11   5 63570.1 1513.17  19
   2 -11  -6 18043.8 583.244  12
   2 -11  -6 17803.8 534.781  15
  -2 -11   6 19825.8 542.160  23
   2  11   6 17892.8 503.951  13
   2  11   6 19047.0 586.054  10
   2  11   6 18147.2 544.766  19
   2 -11  -7 6183.84 262.962  15
   2 -11  -7 6280.61 269.940  14
   2  11   7 6821.55 243.278  13
  -2 -11   7 6733.40 263.134  23
   2  11   7 6368.57 299.391  10
   2 -11  -7 6323.32 298.504  12
   2 -11  -8 36268.6 948.871  14
   2  11   8 36522.3 900.983  13
   2 -11  -8 36774.4 938.876  15
  -2 -11   8 37843.8 935.385  23
   2  11   8 36705.1 991.814  10
   2 -11  -8 35638.5 991.779  12
   2 -11  -9 46275.4 1135.53  15
  -2 -11   9 45509.8 1124.47  23
   2  11   9 44623.4 1184.75  10
   2  11   9 45933.0 1097.16  13
   2 -11  -9 46916.6 1196.22  12
   2 -11  -9 44935.5 1141.33  14
   2 -11 -10 6532.39 267.563  14
   2 -11 -10 6541.49 273.107  15
  -2 -11  10 6688.64 266.296  23
   2  11  10 6666.43 246.489  13
   2  11  10 6777.55 308.780  10
   2 -11 -10 6717.90 310.045  12
   2 -11 -11 17542.5 521.937  15
   2  11  11 17101.0 484.286  13
  -2 -11  11 17341.3 509.078  23
   2 -11 -11 16688.8 504.186  14
   2  11  11 17445.8 563.740  10
   2 -11 -11 16725.3 557.820  12
   2  11  12 30143.0 753.303  13
   2 -11 -12 29602.0 787.050  15
  -2 -11  12 29360.0 777.679  23
   2  11  12 29015.6 836.218  10
   2 -11 -12 28134.7 762.456  14
   2 -11 -12 30636.8 841.532  12
   2  11  13 8152.12 316.824  17
   2 -11 -13 7979.56 308.288  15
   2 -11 -13 7607.21 278.231  14
   2  11  13 7993.58 280.117  13
   2  11  13 8419.60 347.825  10
   2 -11 -13 7944.89 338.838  12
  -2 -11  13 8057.73 300.403  23
   2 -11 -14 892.612 120.260  12
   2  11  14 1111.76 121.193  17
   2  11  14 989.022 102.223  13
   2 -11 -14 1110.81 121.887  15
  -2 -11  14 902.154 102.315  23
   2  11  14 1092.06 139.087  10
   2  11  15 2977.79 182.152  17
   2  11  15 2842.34 202.472  10
  -2 -11  15 2893.35 166.065  23
   2  11  15 3025.75 158.388  13
   2 -11 -15 3082.29 197.067  12
   2  11  16 9732.05 353.318  17
  -2 -11  16 10446.4 345.050  23
   2 -11 -16 10055.0 378.428  12
   2  11  17 1551.35 129.743  17
  -2 -11  17 1814.71 125.544  23
   2 -11 -17 1591.22 135.281  12
   2  11  18 741.513 97.6022  17
  -2 -11  18 641.975 84.3479  23
   2 -11 -18 611.949 93.2677  12
   2  11  19 515.362 85.4360  17
  -2 -11  19 534.518 75.2165  23
   2 -11 -19 543.134 83.8134  12
   2 -11 -20 2000.08 143.262   9
   2  11  20 1873.07 126.992  17
   2 -11 -20 1856.47 111.115  11
  -2 -11  20 1785.22 114.485  23
   2 -11 -20 1955.39 126.377  12
   2  11  21 8556.20 289.984  17
   2 -11 -21 8754.94 315.735   9
  -2 -11  21 8902.70 275.074  23
   2 -11 -22 1791.43 120.941   9
   2  11  22 1907.43 113.944  17
   2 -11 -22 1819.21 124.688  24
   2 -11 -23 14387.6 417.584   9
   2  11  23 15149.9 406.479  17
   2 -11 -23 15618.5 426.849  24
   2 -11 -24 548.867 64.8138  24
   2  11  24 538.973 70.8697  10
   2 -11 -24 450.883 48.9194   9
   2  11  25 3720.94 147.745  10
   2 -11 -25 4302.62 147.515  24
   2  12 -24 863.503 60.9719  19
   2  12 -23 1234.97 85.6458  19
   2 -12  23 1308.52 80.5745  23
   2  12 -22 6919.66 236.794  19
   2 -12  22 6893.30 218.791  15
   2 -12  22 7201.46 231.922  23
   2  12 -21 8769.51 293.257  19
   2 -12  21 8958.46 276.936  15
   2 -12  21 9161.81 289.370  23
   2  12 -20 113.795 68.4401  19
   2 -12  20 87.1496 53.3023  15
   2 -12  20 81.9410 63.0786  23
  -2  12  19 1402.60 92.3822  17
   2 -12  19 1360.47 107.845  15
   2 -12  19 1411.81 116.244  23
  -2  12  18 654.202 73.2910  17
   2 -12  18 497.518 88.0424  23
   2 -12  18 641.517 83.9503  15
   2  12 -18 534.874 66.2927  21
   2 -12  17 5580.43 240.938  23
  -2  12  17 5651.72 212.579  17
   2 -12  17 5476.80 232.132  15
   2  12 -17 5150.13 208.063  21
  -2  12  16 7801.17 268.369  17
   2 -12  16 7782.91 299.365  23
   2 -12  16 7859.65 291.558  15
   2  12 -16 7475.21 254.990  13
   2  12 -16 7318.13 264.749  21
  -2  12  15 6684.73 247.153  17
   2 -12  15 6532.52 267.961  15
   2 -12  15 6594.12 279.592  23
   2  12 -15 6522.03 236.876  13
   2  12 -15 6512.83 246.000  21
  -2  12  14 8152.06 285.578  17
   2 -12  14 8263.25 311.489  15
   2 -12  14 7916.38 316.870  23
   2  12 -14 8022.69 277.446  13
   2  12 -14 8136.62 286.594  21
  -2  12  13 1889.27 125.577  17
   2 -12  13 1603.09 133.631  15
   2 -12  13 1612.00 145.874  23
   2  12 -13 1695.14 115.475  13
   2  12 -12 195.908 94.5120  19
  -2  12  12 402.847 74.1374  17
   2 -12  12 179.261 80.0676  15
   2 -12  12 177.825 89.2902  23
   2  12 -12 148.844 55.3339  13
   2  12 -11 9603.49 363.433  19
  -2  12  11 9858.97 323.807  17
   2 -12  11 9327.69 349.062  15
   2 -12  11 9266.49 358.229  23
   2  12 -11 9570.26 320.949  13
   2  12 -10 11517.2 408.049  19
  -2  12  10 11480.3 363.011  17
   2 -12  10 11131.2 389.995  15
   2 -12  10 11129.4 399.518  23
   2  12 -10 11514.0 364.900  13
   2  12  -9 11474.7 410.017  19
   2 -12   9 11677.2 397.089  15
  -2  12   9 11889.4 368.389  17
   2 -12   9 10955.6 402.119  23
   2  12  -9 11515.4 367.442  13
   2  12  -8 15023.5 494.523  19
  -2  12   8 15323.3 447.269  17
   2 -12   8 15052.4 478.837  15
   2 -12   8 15617.9 494.595  23
   2  12  -8 15158.3 450.528  13
  -2  12   7 13671.4 413.171  17
   2 -12   7 14177.2 450.620  15
   2  12  -7 14276.6 466.168  19
   2 -12   7 14007.3 461.526  23
   2  12  -7 13468.5 416.414  13
   2  12  -6 11265.7 400.417  19
   2 -12   6 10996.7 386.782  15
   2  12  -6 11548.6 302.214  24
   2 -12   6 11778.3 404.496  23
   2  12  -6 11308.5 361.633  13
   2 -12   6 10958.9 335.458  20
   2 -12   5 31378.6 849.447  15
   2  12  -5 31940.9 752.220  24
   2 -12   5 32288.3 867.737  23
   2  12  -5 33280.3 823.361  13
   2 -12   5 31648.8 789.269  20
   2  12  -5 33539.6 869.003  19
   2  12  -4 30127.9 709.542  24
   2 -12   4 29595.2 800.399  15
   2 -12   4 31488.8 830.201  23
   2  12  -4 29814.8 768.259  13
   2 -12   4 29114.0 741.418  20
   2  12  -4 30879.8 818.340  19
   2 -12   3 9255.87 342.778  15
   2  12  -3 9458.32 270.425  24
   2 -12   3 10485.5 381.599  23
   2  12  -3 9670.89 320.116  13
   2 -12   3 9492.26 297.346  20
   2  12  -3 9302.63 354.211  19
   2 -12   2 19976.2 577.361  15
   2  12  -2 19223.3 493.402  24
   2  12  -2 19344.8 541.325  13
  -2 -12  -2 19968.3 573.238  23
   2 -12   2 19624.1 522.742  20
   2  12  -2 19643.3 585.913  19
   2 -12   1 23644.9 665.523  15
   2  12  -1 24237.5 588.292  24
  -2 -12  -1 24264.5 665.569  23
   2 -12   1 24675.8 701.897  23
   2  12  -1 24050.0 636.860  13
   2 -12   1 23191.8 612.255  20
   2  12  -1 24853.7 683.867  19
   2 -12   0 37082.3 937.588  15
   2 -12   0 38708.8 968.465  23
  -2 -12   0 38244.1 939.468  23
   2  12   0 36077.6 900.365  13
   2  12   0 34599.3 849.510  24
   2 -12   0 36125.8 880.429  20
   2  12   0 36483.2 949.258  19
   2  12   1 22288.5 570.713  24
   2  12   1 23160.3 613.683  13
   2 -12  -1 23532.1 649.765  15
  -2 -12   1 24211.9 653.583  23
   2 -12  -1 23581.6 672.439  23
   2  12   1 23418.0 661.019  19
   2 -12  -2 19634.5 577.064  15
   2 -12  -2 19555.0 597.166  23
  -2 -12   2 21662.7 591.869  23
   2  12   2 19599.7 543.611  13
   2  12   2 20462.5 592.902  19
   2  12   3 9814.98 319.519  13
   2 -12  -3 9810.51 347.905  15
   2 -12  -3 10134.0 371.224  23
  -2 -12   3 10798.9 363.697  23
   2  12   3 9565.73 359.453  19
   2  12   4 29039.5 755.369  13
   2 -12  -4 29899.6 795.835  15
   2 -12  -4 30474.8 819.005  23
   2  12   4 29623.7 806.490  19
   2 -12  -4 27355.5 838.813  12
   2 -12  -5 32892.6 862.431  15
   2 -12  -5 32074.1 879.275  23
   2  12   5 32646.9 823.749  13
   2  12   5 32541.8 916.995  10
   2  12   5 32820.9 876.524  19
   2 -12  -5 32723.2 923.025  12
   2 -12  -6 12178.2 409.764  14
   2  12   6 11049.0 429.646  10
   2 -12  -6 11203.4 385.105  15
   2  12   6 11537.7 356.199  13
  -2 -12   6 12490.4 402.063  23
   2 -12  -6 10988.8 430.316  12
   2  12   7 13594.5 402.557  13
   2 -12  -7 13726.2 439.432  15
  -2 -12   7 14242.1 444.468  23
   2  12   7 13430.6 484.790  10
   2 -12  -7 13623.9 451.255  14
   2 -12  -7 13317.7 486.179  12
   2 -12  -8 15068.1 475.538  15
   2  12   8 15410.2 440.978  13
   2 -12  -8 15781.2 488.571  14
  -2 -12   8 15554.9 475.640  23
   2  12   8 15385.7 524.882  10
   2 -12  -8 14848.3 523.206  12
   2 -12  -9 11429.8 388.436  15
   2  12   9 12075.3 361.767  13
   2 -12  -9 11165.4 388.839  14
  -2 -12   9 12073.7 391.901  23
   2  12   9 11466.8 436.118  10
   2 -12  -9 11597.8 440.320  12
   2 -12 -10 11171.8 382.188  15
   2  12  10 11522.7 353.155  13
  -2 -12  10 11719.8 381.800  23
   2 -12 -10 10579.3 371.178  14
   2  12  10 11479.8 430.649  10
   2 -12 -10 10867.8 425.197  12
   2 -12 -11 9803.37 345.756  15
   2  12  11 9363.57 312.625  13
   2 -12 -11 9152.15 328.328  14
   2  12  11 9590.97 381.786  10
  -2 -12  11 9706.31 336.905  23
   2 -12 -11 9510.04 379.379  12
   2 -12 -12 187.468 96.5044  12
   2  12  12 272.588 108.670  10
   2  12  12 174.727 86.0877  17
   2  12  12 175.146 65.3416  13
   2 -12 -12 180.639 55.4906  14
   2 -12 -12 241.103 84.1794  15
  -2 -12  12 266.321 73.9862  23
   2  12  13 1857.06 147.543  17
   2 -12 -13 1780.76 144.964  15
  -2 -12  13 1917.69 137.995  23
   2  12  13 1848.72 122.525  13
   2  12  13 1571.12 161.964  10
   2 -12 -13 2121.33 167.887  12
  -2 -12  14 8297.63 298.083  23
   2  12  14 7858.24 308.111  17
   2  12  14 8019.28 278.601  13
   2 -12 -14 7713.48 330.103  12
   2  12  15 6581.92 270.365  17
  -2 -12  15 6568.26 254.938  23
   2 -12 -15 6465.27 286.061  12
   2  12  16 7697.27 291.695  17
  -2 -12  16 7876.77 278.498  23
   2 -12 -16 7171.56 299.059  12
   2  12  17 5700.56 234.662  17
  -2 -12  17 5462.58 218.024  23
   2 -12 -17 5255.17 239.853  12
   2  12  18 553.066 90.0138  17
  -2 -12  18 621.029 77.6074  23
   2 -12 -18 615.461 84.7522  12
   2  12  19 1446.61 112.049  17
  -2 -12  19 1443.31 98.4679  23
   2 -12 -19 1291.31 102.004  12
   2 -12 -20 130.803 59.5440   9
   2  12  20 170.324 60.9775  17
   2 -12 -20 97.4684 37.8641  11
   2 -12 -20 80.4953 61.4819  24
   2 -12 -21 8724.40 297.589   9
   2  12  21 8713.19 277.010  17
   2 -12 -22 6949.78 237.150   9
   2  12  22 7040.73 222.372  17
   2  12  22 6359.03 237.656  10
   2  12  23 1260.22 74.7352  17
   2 -12 -23 1125.50 82.7401  24
   2 -12 -23 1091.50 73.2282   9
   2 -12 -24 928.849 62.4065  24
   2  12  24 840.054 63.7543  10
   2  13 -22 41.0072 34.4133  19
   2 -13  22 11.6671 32.7119  23
   2  13 -21 2128.80 112.313  19
   2 -13  21 2177.75 108.636  23
   2 -13  20 15126.6 402.025  15
   2 -13  20 16047.2 427.950  23
   2  13 -20 15472.0 431.480  19
   2  13 -19 6106.38 232.213  19
   2 -13  19 6112.00 211.513  15
   2 -13  19 6549.62 232.626  23
   2  13 -18 6621.39 254.147  19
   2 -13  18 6791.68 235.106  15
   2 -13  18 6870.44 251.007  23
   2  13 -17 3164.50 170.934  19
   2 -13  17 3101.91 154.091  15
   2 -13  17 3118.52 166.002  23
   2  13 -16 4655.38 222.383  19
   2 -13  16 4907.76 206.332  15
   2 -13  16 5245.72 226.726  23
   2  13 -15 3886.11 203.324  19
  -2  13  15 3699.04 163.391  17
   2 -13  15 3659.47 180.361  15
   2 -13  15 3783.59 196.994  23
   2  13 -14 1267.75 131.243  19
  -2  13  14 1221.48 97.8347  17
   2 -13  14 1397.48 117.080  15
   2 -13  14 1398.30 127.212  23
   2  13 -13 20604.4 596.169  19
  -2  13  13 20010.3 543.048  17
   2 -13  13 20187.4 572.849  15
   2 -13  13 19977.0 588.201  23
  -2  13  12 11805.6 364.312  17
   2 -13  12 11416.5 386.490  15
   2  13 -12 12645.1 417.220  19
   2 -13  12 11674.9 406.860  23
   2  13 -12 11724.9 349.799  13
   2  13 -11 3448.65 203.606  19
  -2  13  11 3777.54 172.428  17
   2 -13  11 3619.02 192.020  15
   2 -13  11 3787.54 208.620  23
   2  13 -11 3542.61 161.414  13
   2  13 -10 28230.9 775.228  19
  -2  13  10 27626.8 719.761  17
   2 -13  10 28108.1 753.483  15
   2 -13  10 29227.0 778.728  23
   2  13 -10 27195.0 707.848  13
   2  13  -9 4855.07 247.951  19
  -2  13   9 5049.74 204.898  17
   2 -13   9 4670.38 224.788  15
   2  13  -9 4671.92 194.088  13
   2 -13   9 4219.00 233.074  23
   2  13  -8 318.702 96.3584  19
  -2  13   8 439.101 71.9666  17
   2 -13   8 388.427 85.4620  15
   2 -13   8 401.399 107.343  23
   2  13  -8 314.141 64.2645  13
   2 -13   7 7103.41 285.782  15
   2 -13   7 7509.97 311.196  23
   2  13  -7 6992.27 254.568  13
   2  13  -7 7336.90 307.087  19
   2 -13   6 35129.7 917.400  15
   2 -13   6 37596.4 958.240  23
   2  13  -6 34670.8 873.250  13
   2  13  -6 34715.3 938.736  19
   2 -13   5 31309.4 852.152  15
   2  13  -5 31902.1 814.959  13
   2  13  -5 32829.0 877.286  19
   2 -13   4 1219.06 121.019  15
   2  13  -4 1318.08 103.516  13
   2 -13   4 1706.67 161.933  23
   2  13  -4 1504.38 148.432  19
   2 -13   3 3644.70 192.807  15
   2 -13   3 3972.34 232.098  23
   2  13  -3 3556.42 169.930  13
   2  13  -3 3811.12 212.567  19
   2  13  -2 27038.2 714.969  13
   2 -13   2 28210.2 759.455  15
   2  13  -2 28070.2 782.874  19
   2 -13   1 31685.9 838.753  15
  -2 -13  -1 31850.1 843.856  23
   2 -13   1 33736.1 881.631  23
   2  13  -1 31280.0 798.426  13
   2  13  -1 32248.1 864.043  19
   2  13   0 616.355 108.731  19
   2 -13   0 634.190 99.3237  15
  -2 -13   0 619.752 99.7280  23
   2 -13   0 553.119 111.442  23
   2  13   0 590.296 75.9249  13
  -2 -13   1 33223.9 861.805  23
   2 -13  -1 32051.9 851.935  15
   2 -13  -1 33774.1 888.242  23
   2  13   1 32553.7 813.656  13
   2  13   1 32272.9 874.527  19
   2 -13  -2 28226.7 753.410  15
   2 -13  -2 28769.4 784.764  23
  -2 -13   2 28521.5 761.369  23
   2  13   2 27638.2 710.972  13
   2  13   2 27302.9 772.650  19
   2 -13  -3 3326.74 187.142  15
   2 -13  -3 3960.89 217.205  23
   2  13   3 3653.29 167.103  13
  -2 -13   3 3648.40 196.676  23
   2  13   3 3627.49 206.730  19
   2 -13  -3 3455.53 229.550  12
   2 -13  -4 1285.07 153.447  12
   2 -13  -4 1238.31 122.024  15
   2  13   4 1343.26 102.406  13
   2 -13  -4 1399.88 138.343  23
  -2 -13   4 1273.47 123.833  23
   2  13   4 1255.89 151.098  10
   2  13   4 1308.75 141.576  19
   2 -13  -5 31716.6 847.113  15
   2  13   5 33243.0 919.220  10
   2  13   5 31663.2 807.973  13
   2 -13  -5 32171.4 915.482  12
   2 -13  -6 35300.0 922.540  15
   2  13   6 34436.8 879.104  13
   2 -13  -6 35384.1 947.527  14
   2 -13  -6 36000.8 991.931  12
   2  13   6 35037.9 982.711  10
   2 -13  -7 7113.81 281.806  15
   2 -13  -7 6729.37 289.030  14
   2  13   7 7121.52 253.803  13
   2  13   7 6795.03 320.372  10
   2 -13  -7 7176.35 330.792  12
   2 -13  -8 304.024 102.740  12
   2 -13  -8 438.536 84.5365  14
   2 -13  -8 271.587 83.1812  15
  -2 -13   8 391.814 85.5920  23
   2  13   8 335.340 67.6462  13
   2  13   8 474.534 118.811  10
   2 -13  -9 4730.47 221.304  14
   2 -13  -9 4939.64 224.560  15
   2  13   9 4843.55 198.848  13
  -2 -13   9 5181.75 233.827  23
   2  13   9 5156.95 268.748  10
   2 -13  -9 4598.60 256.093  12
   2 -13 -10 27705.6 748.386  15
   2  13  10 27852.4 715.455  13
   2 -13 -10 27372.7 744.176  14
  -2 -13  10 29376.1 761.437  23
   2  13  10 28910.3 811.310  10
   2 -13 -10 28030.3 805.630  12
   2 -13 -11 3582.66 186.021  15
   2  13  11 3496.90 163.944  13
  -2 -13  11 3812.17 192.785  23
   2 -13 -11 3535.41 174.726  14
   2  13  11 3373.19 219.933  10
   2 -13 -11 3914.36 223.248  12
   2  13  12 11860.3 395.952  17
   2 -13 -12 11514.8 378.002  15
   2  13  12 11606.1 355.407  13
  -2 -13  12 12841.4 391.145  23
   2  13  12 10120.9 409.945  10
   2 -13 -12 11266.7 413.829  12
   2  13  13 19798.1 573.168  17
   2  13  13 19413.0 529.237  13
  -2 -13  13 20864.4 561.781  23
   2 -13 -13 18741.5 593.943  12
   2  13  14 1257.43 121.103  17
  -2 -13  14 1295.15 110.183  23
   2 -13 -14 1192.23 121.795  12
   2  13  15 3787.70 191.834  17
  -2 -13  15 3970.67 181.058  23
   2 -13 -15 3663.67 198.192  12
   2  13  16 4971.79 217.680  17
   2 -13 -16 4931.62 222.863  12
  -2 -13  16 5242.95 205.999  23
   2  13  17 3085.59 160.844  17
   2 -13 -17 2747.79 153.956  12
  -2 -13  17 3122.78 145.719  23
   2  13  18 6711.64 243.759  17
   2 -13 -18 7042.23 260.773  24
   2 -13 -18 6581.12 239.408  12
   2 -13 -19 6042.62 238.599   9
   2  13  19 5842.90 212.882  17
   2 -13 -19 5238.96 192.883  11
   2 -13 -19 6014.07 227.145  24
   2 -13 -20 15138.9 440.034   9
   2  13  20 15168.0 412.579  17
   2 -13 -20 15419.2 429.384  24
   2 -13 -21 2241.27 117.098   9
   2  13  21 2006.12 101.544  17
   2 -13 -21 2177.41 113.972  24
   2  13  21 2084.91 116.655  10
   2 -13 -22 26.8016 27.8878   9
   2  13  22 44.2670 28.6532  17
   2  13  22-4.97627 34.4950  10
   2 -13 -22 47.8502 40.9086  24
   2  14 -21 2316.44 97.7905  19
   2 -14  20 3578.46 137.959  23
   2  14 -20 3396.50 136.822  19
   2 -14  19 1408.53 92.2166  23
   2  14 -19 1302.03 90.0024  19
   2 -14  18 6027.69 215.589  23
   2  14 -18 5716.47 213.905  19
   2 -14  17 12641.6 355.688  15
   2 -14  17 13933.5 393.212  23
   2  14 -17 13331.5 392.995  19
   2  14 -16 5400.79 224.288  19
   2 -14  16 5357.26 196.682  15
   2 -14  15 3307.84 151.583  15
   2  14 -15 3536.24 179.371  19
   2 -14  15 3213.13 172.800  23
   2  14 -14 3873.48 193.756  19
   2 -14  14 3611.46 166.587  15
   2 -14  14 3788.74 190.569  23
   2 -14  13 7732.37 269.850  15
   2 -14  13 7572.64 293.840  23
   2  14 -13 7545.38 296.377  19
   2 -14  12 6583.92 254.003  15
   2 -14  12 7299.92 289.001  23
   2  14 -12 6981.83 284.207  19
   2 -14  11 2865.80 156.572  15
   2 -14  11 3024.32 182.015  23
   2  14 -11 2740.96 173.477  19
   2 -14  10 10042.1 341.097  15
   2 -14  10 10694.8 380.555  23
   2  14 -10 10329.0 369.966  19
   2 -14   9 3376.12 178.951  15
   2 -14   9 4012.68 216.003  23
   2  14  -9 3646.32 205.117  19
   2  14  -8 1029.00 126.238  19
   2 -14   8 1193.21 109.553  15
   2 -14   8 1161.78 133.147  23
   2 -14   7 2548.45 156.021  15
   2 -14   7 3097.79 199.487  23
   2  14  -7 2526.69 126.486  13
   2  14  -7 2658.74 181.135  19
[truncated: 544,734 more chars]
