# Supplementary material for: Novel Antimicrobial Compounds as Ophiobolin-Type Sesterterpenes and Pimarane-Type Diterpene From Bipolaris Species TJ403-B1
Source: Front Microbiol. 2020 May 29;11:856. doi: 10.3389/fmicb.2020.00856 (PMC7273749; doi:10.3389/fmicb.2020.00856)
Supplement: DATA SHEET S4 — X-ray crystallographic data (CIFs) of 1, 4, and 8. [file Data_Sheet_4.ZIP › 4.cif]

data_20180624_lmt3_17_2
_audit_creation_date               2018-11-30
_audit_creation_method
;
Olex2 1.2
(compiled 2018.05.29 svn.r3508 for OlexSys, GUI svn.r5506)
;
_shelx_SHELXL_version_number       '2014/7'
_audit_contact_author_address      ?
_audit_contact_author_email        ?
_audit_contact_author_name         ''
_audit_contact_author_phone        ?
_publ_contact_author_id_orcid      ?
_publ_section_references
;
Dolomanov, O.V., Bourhis, L.J., Gildea, R.J, Howard, J.A.K. & Puschmann, H.
 (2009), J. Appl. Cryst. 42, 339-341.

Sheldrick, G.M. (2008). Acta Cryst. A64, 112-122.

Sheldrick, G.M. (2015). Acta Cryst. C71, 3-8.
;
_chemical_name_common              ?
_chemical_name_systematic          ?
_chemical_formula_moiety           'C25 H38 O4, 2(H2 O)'
_chemical_formula_sum              'C25 H42 O6'
_chemical_formula_weight           438.58
_chemical_absolute_configuration   ad
_chemical_melting_point            ?
loop_
  _atom_type_symbol
  _atom_type_description
  _atom_type_scat_dispersion_real
  _atom_type_scat_dispersion_imag
  _atom_type_scat_source
 'C' 'C' 0.0181 0.0091 'International Tables Vol C Tables 4.2.6.8 and 6.1.1.4'
 'H' 'H' 0.0000 0.0000 'International Tables Vol C Tables 4.2.6.8 and 6.1.1.4'
 'O' 'O' 0.0492 0.0322 'International Tables Vol C Tables 4.2.6.8 and 6.1.1.4'

_shelx_space_group_comment
;
The symmetry employed for this shelxl refinement is uniquely defined
by the following loop, which should always be used as a source of
symmetry information in preference to the above space-group names.
They are only intended as comments.
;
_space_group_crystal_system        'monoclinic'
_space_group_IT_number             4
_space_group_name_H-M_alt          'P 1 21 1'
_space_group_name_Hall             'P 2yb'
loop_
  _space_group_symop_operation_xyz
 'x, y, z'
 '-x, y+1/2, -z'

_cell_length_a                     14.63410(10)
_cell_length_b                     6.02160(10)
_cell_length_c                     14.70210(10)
_cell_angle_alpha                  90
_cell_angle_beta                   111.0790(10)
_cell_angle_gamma                  90
_cell_volume                       1208.87(2)
_cell_formula_units_Z              2
_cell_measurement_reflns_used      16319
_cell_measurement_temperature      100.00(10)
_cell_measurement_theta_max        73.7180
_cell_measurement_theta_min        3.2240
_shelx_estimated_absorpt_T_max     0.967
_shelx_estimated_absorpt_T_min     0.773
_exptl_absorpt_coefficient_mu      0.678
_exptl_absorpt_correction_T_max    1.00000
_exptl_absorpt_correction_T_min    0.70095
_exptl_absorpt_correction_type     multi-scan
_exptl_absorpt_process_details
;
CrysAlisPro 1.171.39.28b (Rigaku Oxford Diffraction, 2015)
Empirical absorption correction using spherical harmonics,
 implemented in SCALE3 ABSPACK scaling algorithm.
;
_exptl_absorpt_special_details     ?
_exptl_crystal_colour              'clear light colourless'
_exptl_crystal_colour_lustre       clear
_exptl_crystal_colour_modifier     light
_exptl_crystal_colour_primary      colourless
_exptl_crystal_density_diffrn      1.205
_exptl_crystal_density_meas        ?
_exptl_crystal_density_method      ?
_exptl_crystal_description         block
_exptl_crystal_F_000               480
_exptl_crystal_size_max            0.4
_exptl_crystal_size_mid            0.1
_exptl_crystal_size_min            0.05
_exptl_transmission_factor_max     ?
_exptl_transmission_factor_min     ?
_diffrn_reflns_av_R_equivalents    0.0536
_diffrn_reflns_av_unetI/netI       0.0339
_diffrn_reflns_Laue_measured_fraction_full  0.995
_diffrn_reflns_Laue_measured_fraction_max  0.986
_diffrn_reflns_limit_h_max         18
_diffrn_reflns_limit_h_min         -18
_diffrn_reflns_limit_k_max         6
_diffrn_reflns_limit_k_min         -7
_diffrn_reflns_limit_l_max         18
_diffrn_reflns_limit_l_min         -18
_diffrn_reflns_number              25163
_diffrn_reflns_point_group_measured_fraction_full  0.938
_diffrn_reflns_point_group_measured_fraction_max  0.923
_diffrn_reflns_theta_full          67.684
_diffrn_reflns_theta_max           73.879
_diffrn_reflns_theta_min           3.222
_diffrn_ambient_environment        N~2~
_diffrn_ambient_temperature        100.00(10)
_diffrn_detector                   'CCD plate'
_diffrn_detector_area_resol_mean   ?
_diffrn_measured_fraction_theta_full  0.995
_diffrn_measured_fraction_theta_max  0.986
_diffrn_measurement_details
;
List of Runs (angles in degrees, time in seconds):

  # Type    Start    End  Width  t~exp~   \w     \q     \k     \f   Frames
--------------------------------------------------------------------------
  1  \w    -83.00 -58.00   0.50    0.50    --    0.00 -38.00-150.00   50
  2  \w    -17.00  17.00   0.50    0.50    --    0.00 -38.00-150.00   68
  3  \w     45.00  89.00   0.50    0.50    --    0.00  38.00  30.00   88
  4  \w    -37.00  13.00   0.50    0.50    --    0.00 -57.00 -90.00  100
  5  \w    -17.00  28.00   0.50    0.50    --    0.00  38.00  30.00   90
  6  \w    -88.00 -44.00   0.50    0.50    --    0.00 -38.00-180.00   88
  7  \w     58.00  89.00   0.50    0.50    --    0.00  38.00 -90.00   62
  8  \w    -16.00  32.00   0.50    0.50    --    0.00  38.00 120.00   96
  9  \w    -16.00  16.00   0.50    0.50    --    0.00  38.00 -90.00   64
 10  \w    -89.00 -53.00   0.50    0.50    --    0.00 -57.00 -90.00   72
 11  \w    -17.00  16.00   0.50    0.50    --    0.00 -38.00-180.00   66
 12  \w     15.00  56.00   0.50    0.50    --    0.00  57.00  30.00   82
 13  \w     36.00  86.00   0.50    0.50    --    0.00  38.00 120.00  100
 14  \w    -14.00  54.00   0.50    0.50    --    0.00  19.00   0.00  136
 15  \w     68.00  94.00   0.50    1.00    --   94.60  69.00 -14.41   52
 16  \w     72.00 116.00   0.50    1.00    --   94.60  56.00  27.86   88
 17  \w     70.00 182.00   0.50    1.00    --   94.60  63.00 -34.93  224
 18  \w    119.00 181.00   0.50    1.00    --   94.60  68.00 100.08  124
 19  \w     71.00 109.00   0.50    1.00    --   94.60  68.00 100.08   76
 20  \w     76.00 184.00   0.50    1.00    --   94.60  50.00 -85.64  216
 21  \w    126.00 183.00   0.50    1.00    --   94.60  74.00 157.62  114
 22  \w     69.00  95.00   0.50    1.00    --   94.60  66.00 -60.02   52
 23  \w     66.00 109.00   0.50    1.00    --   94.60  75.00 -14.68   86
 24  \w     69.00  96.00   0.50    1.00    --   94.60  66.00-176.12   54
 25  \w     49.00 126.00   0.50    1.00    --   94.60 -82.00   0.00  154
 26  \w      7.00 119.00   0.50    1.00    --   94.60 -77.00-120.00  224
 27  \w     32.00 100.00   0.50    1.00    --   94.60 -82.00 120.00  136
 28  \w     71.00  97.00   0.50    1.00    --   94.60  61.00 150.00   52
 29  \w    116.00 173.00   0.50    1.00    --   94.60  61.00 150.00  114
 30  \w     71.00 144.00   0.50    1.00    --   94.60  61.00  90.00  146
 31  \w     68.00 178.00   0.50    1.00    --   94.60  70.00 122.61  220
 32  \w     67.00  93.00   0.50    1.00    --   94.60  74.00 -35.16   52
 33  \w     68.00  93.00   0.50    1.00    --   94.60  72.00 -97.62   50
 34  \w    133.00 159.00   0.50    1.00    --   94.60  65.00-114.47   52
 35  \w     69.00  95.00   0.50    1.00    --   94.60  70.00  92.54   52
 36  \w    114.00 184.00   0.50    1.00    --   94.60  71.00-170.59  140
 37  \w     71.00 103.00   0.50    1.00    --   94.60  65.00-114.47   64
 38  \w      9.00 115.00   0.50    1.00    --   94.60 -61.00 120.00  212
 39  \w     72.00  98.00   0.50    1.00    --   94.60  61.00 -90.00   52
 40  \w     81.00 106.00   0.50    1.00    --   94.60 -82.00-120.00   50
 41  \w     71.00 104.00   0.50    1.00    --   94.60  61.00 120.00   66
 42  \w    126.00 184.00   0.50    1.00    --   94.60  70.00-150.72  116
 43  \w     75.00 106.00   0.50    1.00    --   94.60  45.00-180.00   62
 44  \w     79.00 114.00   0.50    1.00    --   94.60  45.00  60.00   70
 45  \w    120.00 182.00   0.50    1.00    --   94.60  63.00  69.92  124
 46  \w     71.00 175.00   0.50    1.00    --   94.60  61.00 -60.00  208
 47  \w     71.00  96.00   0.50    1.00    --   94.60  61.00-120.00   50
 48  \w    114.00 183.00   0.50    1.00    --   94.60  61.00  30.00  138
 49  \w     68.00 122.00   0.50    1.00    --   94.60  70.00-150.72  108
 50  \w     73.00  99.00   0.50    1.00    --   94.60  61.00  30.00   52
 51  \w     71.00  97.00   0.50    1.00    --   94.60  61.00  60.00   52
 52  \w    126.00 151.00   0.50    1.00    --   94.60  69.00 -14.41   50
 53  \w     70.00  96.00   0.50    1.00    --   94.60  63.00  69.92   52
 54  \w     67.00 106.00   0.50    1.00    --   94.60  71.00-170.59   78
 55  \w     66.00  91.00   0.50    1.00    --   94.60  74.00 157.62   50
 56  \w     81.00 126.00   0.50    1.00    --   94.60 -82.00 150.00   90
 57  \w     73.00  99.00   0.50    1.00    --   94.60  53.00  57.21   52
;
_diffrn_measurement_device         'four-circle diffractometer'
_diffrn_measurement_device_type    'XtaLAB AFC12 (RINC): Kappa single'
_diffrn_measurement_method         '\w scans'
_diffrn_orient_matrix_type        
 'CrysAlisPro convention (1999,Acta A55,543-557)'
_diffrn_orient_matrix_UB_11        -0.1023700000
_diffrn_orient_matrix_UB_12        0.0134460000
_diffrn_orient_matrix_UB_13        0.0070931000
_diffrn_orient_matrix_UB_21        -0.0468026000
_diffrn_orient_matrix_UB_22        0.0126168000
_diffrn_orient_matrix_UB_23        -0.1119539000
_diffrn_orient_matrix_UB_31        -0.0077298000
_diffrn_orient_matrix_UB_32        -0.2551403000
_diffrn_orient_matrix_UB_33        -0.0051907000
_diffrn_radiation_monochromator    graphite
_diffrn_radiation_probe            x-ray
_diffrn_radiation_type             CuK\a
_diffrn_radiation_wavelength       1.54184
_diffrn_source                     'fine-focus sealed X-ray tube'
_diffrn_source_type                'Enhance (Cu) X-ray Source'
_reflns_Friedel_coverage           0.701
_reflns_Friedel_fraction_full      0.868
_reflns_Friedel_fraction_max       0.845
_reflns_number_gt                  4375
_reflns_number_total               4543
_reflns_odcompleteness_completeness  99.50
_reflns_odcompleteness_iscentric   1
_reflns_odcompleteness_theta       66.97
_reflns_special_details
;
 Reflections were merged by SHELXL according to the crystal
 class for the calculation of statistics and refinement.
 
 _reflns_Friedel_fraction is defined as the number of unique
 Friedel pairs measured divided by the number that would be
 possible theoretically, ignoring centric projections and
 systematic absences.
;
_reflns_threshold_expression       'I > 2\s(I)'
_computing_cell_refinement         'CrysAlisPro 1.171.39.28b (Rigaku OD, 2015)'
_computing_data_collection         'CrysAlisPro 1.171.39.28b (Rigaku OD, 2015)'
_computing_data_reduction          'CrysAlisPro 1.171.39.28b (Rigaku OD, 2015)'
_computing_molecular_graphics      'Olex2 (Dolomanov et al., 2009)'
_computing_publication_material    'Olex2 (Dolomanov et al., 2009)'
_computing_structure_refinement    'ShelXL (Sheldrick, 2015)'
_computing_structure_solution      'ShelXS-1997 (Sheldrick, 2008)'
_refine_diff_density_max           0.167
_refine_diff_density_min           -0.178
_refine_diff_density_rms           0.037
_refine_ls_abs_structure_details
;
 Flack x determined using 1727 quotients [(I+)-(I-)]/[(I+)+(I-)]
 (Parsons, Flack and Wagner, Acta Cryst. B69 (2013) 249-259).
;
_refine_ls_abs_structure_Flack     0.05(10)
_refine_ls_extinction_coef         .
_refine_ls_extinction_method       none
_refine_ls_goodness_of_fit_ref     1.072
_refine_ls_hydrogen_treatment      constr
_refine_ls_matrix_type             full
_refine_ls_number_parameters       293
_refine_ls_number_reflns           4543
_refine_ls_number_restraints       1
_refine_ls_R_factor_all            0.0352
_refine_ls_R_factor_gt             0.0337
_refine_ls_restrained_S_all        1.072
_refine_ls_shift/su_max            0.000
_refine_ls_shift/su_mean           0.000
_refine_ls_structure_factor_coef   Fsqd
_refine_ls_weighting_details      
 'w=1/[\s^2^(Fo^2^)+(0.0467P)^2^+0.2320P] where P=(Fo^2^+2Fc^2^)/3'
_refine_ls_weighting_scheme        calc
_refine_ls_wR_factor_gt            0.0879
_refine_ls_wR_factor_ref           0.0886
_refine_special_details            ?
_olex2_refinement_description
;
1. Fixed Uiso
 At 1.2 times of:
  All C(H) groups, All C(H,H) groups
 At 1.5 times of:
  All C(H,H,H) groups, All O(H) groups, All O(H,H) groups
2.a Free rotating group:
 O5(H5A,H5B), O6(H6A,H6B)
2.b Ternary CH refined with riding coordinates:
 C2(H2), C5(H5), C6(H6), C10(H10), C14(H14), C15(H15)
2.c Secondary CH2 refined with riding coordinates:
 C1(H1A,H1B), C4(H4A,H4B), C9(H9A,H9B), C12(H12A,H12B), C13(H13A,H13B),
 C16(H16A,H16B)
2.d Aromatic/amide H refined with riding coordinates:
 C8(H8), C17(H17), C18(H18)
2.e Idealised Me refined as rotating group:
 C20(H20A,H20B,H20C), C22(H22A,H22B,H22C), C23(H23A,H23B,H23C), C24(H24A,H24B,
 H24C), C25(H25A,H25B,H25C)
2.f Idealised tetrahedral OH refined as rotating group:
 O1(H1), O4(H4)
;
_atom_sites_solution_hydrogens     mixed
_atom_sites_solution_primary       direct
_atom_sites_solution_secondary     ?
loop_
  _atom_site_label
  _atom_site_type_symbol
  _atom_site_fract_x
  _atom_site_fract_y
  _atom_site_fract_z
  _atom_site_U_iso_or_equiv
  _atom_site_adp_type
  _atom_site_occupancy
  _atom_site_site_symmetry_order
  _atom_site_calc_flag
  _atom_site_refinement_flags_posn
  _atom_site_refinement_flags_adp
  _atom_site_refinement_flags_occupancy
  _atom_site_disorder_assembly
  _atom_site_disorder_group
 C1 C 0.52325(14) 0.5251(4) 0.20995(13) 0.0186(4) Uani 1 1 d . . . . .
 H1A H 0.4890 0.6529 0.2222 0.022 Uiso 1 1 calc R . . . .
 H1B H 0.5251 0.5432 0.1451 0.022 Uiso 1 1 calc R . . . .
 C2 C 0.46140(14) 0.3190(4) 0.20849(14) 0.0183(4) Uani 1 1 d . . . . .
 H2 H 0.4969 0.1910 0.1966 0.022 Uiso 1 1 calc R . . . .
 C3 C 0.36013(14) 0.3233(4) 0.12541(14) 0.0203(4) Uani 1 1 d . . . . .
 C4 C 0.30489(15) 0.1383(4) 0.15513(15) 0.0223(5) Uani 1 1 d . . . . .
 H4A H 0.2347 0.1557 0.1226 0.027 Uiso 1 1 calc R . . . .
 H4B H 0.3240 -0.0063 0.1388 0.027 Uiso 1 1 calc R . . . .
 C5 C 0.33390(14) 0.1631(4) 0.26472(15) 0.0205(4) Uani 1 1 d . . . . .
 H5 H 0.3327 0.0198 0.2959 0.025 Uiso 1 1 calc R . . . .
 C6 C 0.43797(14) 0.2650(4) 0.30209(14) 0.0177(4) Uani 1 1 d . . . . .
 H6 H 0.4858 0.1598 0.3441 0.021 Uiso 1 1 calc R . . . .
 C7 C 0.42684(14) 0.4614(4) 0.35909(14) 0.0169(4) Uani 1 1 d . . . . .
 C8 C 0.49578(14) 0.5823(4) 0.42428(14) 0.0176(4) Uani 1 1 d . . . . .
 H8 H 0.4754 0.6974 0.4547 0.021 Uiso 1 1 calc R . . . .
 C9 C 0.60397(14) 0.5468(4) 0.45247(14) 0.0174(4) Uani 1 1 d . . . . .
 H9A H 0.6176 0.3889 0.4540 0.021 Uiso 1 1 calc R . . . .
 H9B H 0.6378 0.6061 0.5173 0.021 Uiso 1 1 calc R . . . .
 C10 C 0.64227(13) 0.6615(4) 0.37960(14) 0.0162(4) Uani 1 1 d . . . . .
 H10 H 0.6009 0.7935 0.3581 0.019 Uiso 1 1 calc R . . . .
 C11 C 0.63039(14) 0.5342(4) 0.28354(13) 0.0167(4) Uani 1 1 d . . . . .
 C12 C 0.69233(15) 0.6876(4) 0.24447(14) 0.0211(5) Uani 1 1 d . . . . .
 H12A H 0.7095 0.6132 0.1943 0.025 Uiso 1 1 calc R . . . .
 H12B H 0.6567 0.8225 0.2173 0.025 Uiso 1 1 calc R . . . .
 C13 C 0.78438(15) 0.7405(4) 0.33316(14) 0.0221(5) Uani 1 1 d . . . . .
 H13A H 0.8128 0.8804 0.3241 0.026 Uiso 1 1 calc R . . . .
 H13B H 0.8329 0.6242 0.3434 0.026 Uiso 1 1 calc R . . . .
 C14 C 0.74942(13) 0.7544(4) 0.42069(13) 0.0171(4) Uani 1 1 d . . . . .
 H14 H 0.7431 0.9132 0.4318 0.020 Uiso 1 1 calc R . . . .
 C15 C 0.82288(14) 0.6624(4) 0.51793(14) 0.0173(4) Uani 1 1 d . . . . .
 H15 H 0.7939 0.6864 0.5677 0.021 Uiso 1 1 calc R . . . .
 C16 C 0.91693(14) 0.8045(4) 0.54713(14) 0.0207(4) Uani 1 1 d . . . . .
 H16A H 0.9474 0.7849 0.4989 0.025 Uiso 1 1 calc R . . . .
 H16B H 0.8995 0.9600 0.5471 0.025 Uiso 1 1 calc R . . . .
 C17 C 0.98964(14) 0.7444(4) 0.64618(14) 0.0199(4) Uani 1 1 d . . . . .
 H17 H 1.0354 0.6345 0.6498 0.024 Uiso 1 1 calc R . . . .
 C18 C 0.99217(14) 0.8388(4) 0.72816(15) 0.0199(4) Uani 1 1 d . . . . .
 H18 H 0.9495 0.9570 0.7225 0.024 Uiso 1 1 calc R . . . .
 C19 C 1.05735(14) 0.7741(4) 0.83036(14) 0.0192(4) Uani 1 1 d . . . . .
 C20 C 0.36529(15) 0.2875(5) 0.02481(15) 0.0274(5) Uani 1 1 d . . . . .
 H20A H 0.3002 0.2784 -0.0228 0.041 Uiso 1 1 calc GR . . . .
 H20B H 0.3997 0.1520 0.0246 0.041 Uiso 1 1 calc GR . . . .
 H20C H 0.3992 0.4097 0.0093 0.041 Uiso 1 1 calc GR . . . .
 C21 C 0.32079(14) 0.4997(4) 0.33661(14) 0.0180(4) Uani 1 1 d . . . . .
 C22 C 0.67576(14) 0.3019(4) 0.29798(15) 0.0203(4) Uani 1 1 d . . . . .
 H22A H 0.7451 0.3129 0.3328 0.030 Uiso 1 1 calc GR . . . .
 H22B H 0.6638 0.2345 0.2356 0.030 Uiso 1 1 calc GR . . . .
 H22C H 0.6469 0.2126 0.3346 0.030 Uiso 1 1 calc GR . . . .
 C23 C 0.84739(15) 0.4160(4) 0.51975(15) 0.0204(4) Uani 1 1 d . . . . .
 H23A H 0.7884 0.3303 0.5042 0.031 Uiso 1 1 calc GR . . . .
 H23B H 0.8918 0.3761 0.5835 0.031 Uiso 1 1 calc GR . . . .
 H23C H 0.8774 0.3865 0.4727 0.031 Uiso 1 1 calc GR . . . .
 C24 C 1.13000(15) 0.5910(4) 0.83374(15) 0.0243(5) Uani 1 1 d . . . . .
 H24A H 1.1670 0.5540 0.9004 0.037 Uiso 1 1 calc GR . . . .
 H24B H 1.1736 0.6413 0.8025 0.037 Uiso 1 1 calc GR . . . .
 H24C H 1.0952 0.4621 0.8005 0.037 Uiso 1 1 calc GR . . . .
 C25 C 1.10998(17) 0.9760(4) 0.88761(16) 0.0261(5) Uani 1 1 d . . . . .
 H25A H 1.0629 1.0883 0.8861 0.039 Uiso 1 1 calc GR . . . .
 H25B H 1.1546 1.0333 0.8589 0.039 Uiso 1 1 calc GR . . . .
 H25C H 1.1457 0.9339 0.9539 0.039 Uiso 1 1 calc GR . . . .
 O1 O 0.31789(10) 0.5359(3) 0.12986(11) 0.0217(3) Uani 1 1 d . . . . .
 H1 H 0.2580 0.5266 0.1066 0.033 Uiso 1 1 calc GR . . . .
 O2 O 0.26984(10) 0.3252(3) 0.28635(10) 0.0213(3) Uani 1 1 d . . . . .
 O3 O 0.28129(10) 0.6550(3) 0.35963(10) 0.0236(3) Uani 1 1 d . . . . .
 O4 O 0.99365(10) 0.6966(3) 0.88108(10) 0.0198(3) Uani 1 1 d . . . . .
 H4 H 0.9592 0.5947 0.8502 0.030 Uiso 1 1 calc GR . . . .
 O5 O 0.88292(12) 0.3450(3) 0.79549(12) 0.0294(4) Uani 1 1 d . . . . .
 H5A H 0.8377 0.3048 0.7431 0.044 Uiso 1 1 d G . . . .
 H5B H 0.8815 0.2494 0.8375 0.044 Uiso 1 1 d G . . . .
 O6 O 0.11015(11) 0.5260(3) 0.06407(11) 0.0233(3) Uani 1 1 d . . . . .
 H6A H 0.0780 0.4263 0.0804 0.035 Uiso 1 1 d G . . . .
 H6B H 0.0734 0.5638 0.0069 0.035 Uiso 1 1 d G . . . .

loop_
  _atom_site_aniso_label
  _atom_site_aniso_U_11
  _atom_site_aniso_U_22
  _atom_site_aniso_U_33
  _atom_site_aniso_U_23
  _atom_site_aniso_U_13
  _atom_site_aniso_U_12
 C1 0.0187(10) 0.0203(12) 0.0148(9) 0.0007(8) 0.0036(8) 0.0012(8)
 C2 0.0163(8) 0.0195(12) 0.0169(9) -0.0011(8) 0.0035(7) 0.0012(8)
 C3 0.0176(9) 0.0230(12) 0.0177(9) -0.0027(9) 0.0032(7) 0.0007(9)
 C4 0.0196(9) 0.0195(12) 0.0228(10) -0.0041(8) 0.0016(8) -0.0019(9)
 C5 0.0182(9) 0.0173(12) 0.0240(10) -0.0005(8) 0.0053(8) -0.0027(8)
 C6 0.0172(8) 0.0151(11) 0.0182(9) 0.0017(8) 0.0031(7) -0.0012(8)
 C7 0.0169(9) 0.0174(12) 0.0161(9) 0.0048(8) 0.0056(7) 0.0017(8)
 C8 0.0177(9) 0.0192(12) 0.0164(9) 0.0002(8) 0.0068(8) 0.0010(8)
 C9 0.0163(9) 0.0194(12) 0.0142(9) -0.0016(7) 0.0028(7) -0.0002(8)
 C10 0.0140(8) 0.0152(11) 0.0172(9) -0.0002(8) 0.0029(7) 0.0006(8)
 C11 0.0159(9) 0.0167(11) 0.0161(9) 0.0021(8) 0.0041(7) 0.0009(8)
 C12 0.0195(10) 0.0252(13) 0.0172(9) 0.0029(8) 0.0051(8) -0.0018(8)
 C13 0.0188(9) 0.0258(13) 0.0192(9) 0.0029(9) 0.0039(8) -0.0052(9)
 C14 0.0156(8) 0.0146(11) 0.0175(9) 0.0027(8) 0.0017(7) -0.0004(8)
 C15 0.0151(9) 0.0175(11) 0.0170(9) 0.0010(8) 0.0031(7) 0.0002(8)
 C16 0.0180(9) 0.0207(13) 0.0194(10) 0.0030(8) 0.0020(8) -0.0036(8)
 C17 0.0151(9) 0.0193(12) 0.0219(10) -0.0001(8) 0.0023(7) -0.0006(8)
 C18 0.0184(9) 0.0169(11) 0.0227(10) 0.0015(9) 0.0053(8) 0.0009(8)
 C19 0.0183(9) 0.0197(12) 0.0193(9) -0.0002(8) 0.0064(8) -0.0005(8)
 C20 0.0233(10) 0.0376(16) 0.0181(10) -0.0056(9) 0.0033(8) -0.0016(10)
 C21 0.0158(9) 0.0221(12) 0.0152(8) 0.0010(8) 0.0044(7) -0.0017(8)
 C22 0.0193(9) 0.0188(13) 0.0214(9) -0.0029(8) 0.0055(8) 0.0025(8)
 C23 0.0161(9) 0.0208(12) 0.0211(10) 0.0025(8) 0.0027(8) 0.0011(8)
 C24 0.0215(10) 0.0290(14) 0.0203(10) 0.0029(9) 0.0049(8) 0.0056(9)
 C25 0.0239(11) 0.0266(14) 0.0264(10) -0.0047(10) 0.0073(9) -0.0081(9)
 O1 0.0164(7) 0.0201(9) 0.0249(7) 0.0009(6) 0.0031(6) 0.0007(6)
 O2 0.0165(6) 0.0228(9) 0.0231(7) -0.0027(6) 0.0053(5) -0.0035(6)
 O3 0.0178(7) 0.0288(10) 0.0231(7) -0.0018(6) 0.0059(6) 0.0038(7)
 O4 0.0181(7) 0.0205(9) 0.0199(7) -0.0031(6) 0.0056(6) -0.0036(6)
 O5 0.0287(8) 0.0251(10) 0.0267(8) 0.0015(7) 0.0005(6) -0.0061(7)
 O6 0.0196(7) 0.0259(10) 0.0218(7) 0.0046(6) 0.0043(6) -0.0023(6)

_geom_special_details
;
 All esds (except the esd in the dihedral angle between two l.s. planes)
 are estimated using the full covariance matrix.  The cell esds are taken
 into account individually in the estimation of esds in distances, angles
 and torsion angles; correlations between esds in cell parameters are only
 used when they are defined by crystal symmetry.  An approximate (isotropic)
 treatment of cell esds is used for estimating esds involving l.s. planes.
;
loop_
  _geom_bond_atom_site_label_1
  _geom_bond_atom_site_label_2
  _geom_bond_distance
  _geom_bond_site_symmetry_2
  _geom_bond_publ_flag
 C1 H1A 0.9700 . ?
 C1 H1B 0.9700 . ?
 C1 C2 1.532(3) . ?
 C1 C11 1.553(3) . ?
 C2 H2 0.9800 . ?
 C2 C3 1.545(3) . ?
 C2 C6 1.567(3) . ?
 C3 C4 1.530(3) . ?
 C3 C20 1.523(3) . ?
 C3 O1 1.433(3) . ?
 C4 H4A 0.9700 . ?
 C4 H4B 0.9700 . ?
 C4 C5 1.519(3) . ?
 C5 H5 0.9800 . ?
 C5 C6 1.548(3) . ?
 C5 O2 1.465(3) . ?
 C6 H6 0.9800 . ?
 C6 C7 1.492(3) . ?
 C7 C8 1.331(3) . ?
 C7 C21 1.484(3) . ?
 C8 H8 0.9300 . ?
 C8 C9 1.501(3) . ?
 C9 H9A 0.9700 . ?
 C9 H9B 0.9700 . ?
 C9 C10 1.540(3) . ?
 C10 H10 0.9800 . ?
 C10 C11 1.561(3) . ?
 C10 C14 1.567(3) . ?
 C11 C12 1.543(3) . ?
 C11 C22 1.530(3) . ?
 C12 H12A 0.9700 . ?
 C12 H12B 0.9700 . ?
 C12 C13 1.534(3) . ?
 C13 H13A 0.9700 . ?
 C13 H13B 0.9700 . ?
 C13 C14 1.549(3) . ?
 C14 H14 0.9800 . ?
 C14 C15 1.550(3) . ?
 C15 H15 0.9800 . ?
 C15 C16 1.545(3) . ?
 C15 C23 1.525(3) . ?
 C16 H16A 0.9700 . ?
 C16 H16B 0.9700 . ?
 C16 C17 1.506(3) . ?
 C17 H17 0.9300 . ?
 C17 C18 1.321(3) . ?
 C18 H18 0.9300 . ?
 C18 C19 1.513(3) . ?
 C19 C24 1.520(3) . ?
 C19 C25 1.521(3) . ?
 C19 O4 1.464(2) . ?
 C20 H20A 0.9600 . ?
 C20 H20B 0.9600 . ?
 C20 H20C 0.9600 . ?
 C21 O2 1.345(3) . ?
 C21 O3 1.210(3) . ?
 C22 H22A 0.9600 . ?
 C22 H22B 0.9600 . ?
 C22 H22C 0.9600 . ?
 C23 H23A 0.9600 . ?
 C23 H23B 0.9600 . ?
 C23 H23C 0.9600 . ?
 C24 H24A 0.9600 . ?
 C24 H24B 0.9600 . ?
 C24 H24C 0.9600 . ?
 C25 H25A 0.9600 . ?
 C25 H25B 0.9600 . ?
 C25 H25C 0.9600 . ?
 O1 H1 0.8200 . ?
 O4 H4 0.8200 . ?
 O5 H5A 0.8497 . ?
 O5 H5B 0.8501 . ?
 O6 H6A 0.8496 . ?
 O6 H6B 0.8499 . ?

loop_
  _geom_angle_atom_site_label_1
  _geom_angle_atom_site_label_2
  _geom_angle_atom_site_label_3
  _geom_angle
  _geom_angle_site_symmetry_1
  _geom_angle_site_symmetry_3
  _geom_angle_publ_flag
 H1A C1 H1B 107.0 . . ?
 C2 C1 H1A 107.6 . . ?
 C2 C1 H1B 107.6 . . ?
 C2 C1 C11 118.80(17) . . ?
 C11 C1 H1A 107.6 . . ?
 C11 C1 H1B 107.6 . . ?
 C1 C2 H2 106.9 . . ?
 C1 C2 C3 113.06(18) . . ?
 C1 C2 C6 118.08(16) . . ?
 C3 C2 H2 106.9 . . ?
 C3 C2 C6 104.31(15) . . ?
 C6 C2 H2 106.9 . . ?
 C4 C3 C2 102.54(17) . . ?
 C20 C3 C2 113.38(17) . . ?
 C20 C3 C4 112.96(19) . . ?
 O1 C3 C2 106.60(17) . . ?
 O1 C3 C4 110.90(16) . . ?
 O1 C3 C20 110.09(18) . . ?
 C3 C4 H4A 110.8 . . ?
 C3 C4 H4B 110.8 . . ?
 H4A C4 H4B 108.8 . . ?
 C5 C4 C3 104.87(17) . . ?
 C5 C4 H4A 110.8 . . ?
 C5 C4 H4B 110.8 . . ?
 C4 C5 H5 111.4 . . ?
 C4 C5 C6 106.23(16) . . ?
 C6 C5 H5 111.4 . . ?
 O2 C5 C4 109.83(17) . . ?
 O2 C5 H5 111.4 . . ?
 O2 C5 C6 106.47(17) . . ?
 C2 C6 H6 110.8 . . ?
 C5 C6 C2 105.58(15) . . ?
 C5 C6 H6 110.8 . . ?
 C7 C6 C2 115.53(18) . . ?
 C7 C6 C5 102.79(16) . . ?
 C7 C6 H6 110.8 . . ?
 C8 C7 C6 129.10(18) . . ?
 C8 C7 C21 122.47(19) . . ?
 C21 C7 C6 108.33(17) . . ?
 C7 C8 H8 117.6 . . ?
 C7 C8 C9 124.90(19) . . ?
 C9 C8 H8 117.6 . . ?
 C8 C9 H9A 109.5 . . ?
 C8 C9 H9B 109.5 . . ?
 C8 C9 C10 110.84(16) . . ?
 H9A C9 H9B 108.1 . . ?
 C10 C9 H9A 109.5 . . ?
 C10 C9 H9B 109.5 . . ?
 C9 C10 H10 104.6 . . ?
 C9 C10 C11 117.32(18) . . ?
 C9 C10 C14 117.14(15) . . ?
 C11 C10 H10 104.6 . . ?
 C11 C10 C14 107.14(15) . . ?
 C14 C10 H10 104.6 . . ?
 C1 C11 C10 113.80(16) . . ?
 C12 C11 C1 110.05(16) . . ?
 C12 C11 C10 98.83(17) . . ?
 C22 C11 C1 110.09(18) . . ?
 C22 C11 C10 114.97(16) . . ?
 C22 C11 C12 108.39(17) . . ?
 C11 C12 H12A 110.7 . . ?
 C11 C12 H12B 110.7 . . ?
 H12A C12 H12B 108.8 . . ?
 C13 C12 C11 105.17(16) . . ?
 C13 C12 H12A 110.7 . . ?
 C13 C12 H12B 110.7 . . ?
 C12 C13 H13A 110.7 . . ?
 C12 C13 H13B 110.7 . . ?
 C12 C13 C14 105.43(16) . . ?
 H13A C13 H13B 108.8 . . ?
 C14 C13 H13A 110.7 . . ?
 C14 C13 H13B 110.7 . . ?
 C10 C14 H14 105.7 . . ?
 C13 C14 C10 104.13(15) . . ?
 C13 C14 H14 105.7 . . ?
 C13 C14 C15 114.85(16) . . ?
 C15 C14 C10 119.61(17) . . ?
 C15 C14 H14 105.7 . . ?
 C14 C15 H15 107.0 . . ?
 C16 C15 C14 108.16(17) . . ?
 C16 C15 H15 107.0 . . ?
 C23 C15 C14 116.42(18) . . ?
 C23 C15 H15 107.0 . . ?
 C23 C15 C16 110.72(17) . . ?
 C15 C16 H16A 109.1 . . ?
 C15 C16 H16B 109.1 . . ?
 H16A C16 H16B 107.8 . . ?
 C17 C16 C15 112.62(17) . . ?
 C17 C16 H16A 109.1 . . ?
 C17 C16 H16B 109.1 . . ?
 C16 C17 H17 118.1 . . ?
 C18 C17 C16 123.8(2) . . ?
 C18 C17 H17 118.1 . . ?
 C17 C18 H18 116.7 . . ?
 C17 C18 C19 126.6(2) . . ?
 C19 C18 H18 116.7 . . ?
 C18 C19 C24 113.76(17) . . ?
 C18 C19 C25 110.91(19) . . ?
 C24 C19 C25 110.65(18) . . ?
 O4 C19 C18 107.37(15) . . ?
 O4 C19 C24 108.54(18) . . ?
 O4 C19 C25 105.17(16) . . ?
 C3 C20 H20A 109.5 . . ?
 C3 C20 H20B 109.5 . . ?
 C3 C20 H20C 109.5 . . ?
 H20A C20 H20B 109.5 . . ?
 H20A C20 H20C 109.5 . . ?
 H20B C20 H20C 109.5 . . ?
 O2 C21 C7 109.26(18) . . ?
 O3 C21 C7 128.6(2) . . ?
 O3 C21 O2 122.08(18) . . ?
 C11 C22 H22A 109.5 . . ?
 C11 C22 H22B 109.5 . . ?
 C11 C22 H22C 109.5 . . ?
 H22A C22 H22B 109.5 . . ?
 H22A C22 H22C 109.5 . . ?
 H22B C22 H22C 109.5 . . ?
 C15 C23 H23A 109.5 . . ?
 C15 C23 H23B 109.5 . . ?
 C15 C23 H23C 109.5 . . ?
 H23A C23 H23B 109.5 . . ?
 H23A C23 H23C 109.5 . . ?
 H23B C23 H23C 109.5 . . ?
 C19 C24 H24A 109.5 . . ?
 C19 C24 H24B 109.5 . . ?
 C19 C24 H24C 109.5 . . ?
 H24A C24 H24B 109.5 . . ?
 H24A C24 H24C 109.5 . . ?
 H24B C24 H24C 109.5 . . ?
 C19 C25 H25A 109.5 . . ?
 C19 C25 H25B 109.5 . . ?
 C19 C25 H25C 109.5 . . ?
 H25A C25 H25B 109.5 . . ?
 H25A C25 H25C 109.5 . . ?
 H25B C25 H25C 109.5 . . ?
 C3 O1 H1 109.5 . . ?
 C21 O2 C5 111.59(15) . . ?
 C19 O4 H4 109.5 . . ?
 H5A O5 H5B 104.5 . . ?
 H6A O6 H6B 104.5 . . ?

loop_
  _refln_index_h
  _refln_index_k
  _refln_index_l
  _refln_F_squared_meas
  _refln_F_squared_sigma
 0 -7 4 23.69 2.48
 0 -7 5 34.65 3
 0 -6 0 243.07 16.53
 0 -6 0 297.66 17.28
 0 -6 0 272.09 16.65
 0 -6 1 41.46 4.52
 0 -6 -1 40.06 4.29
 0 -6 1 46.1 4.83
 0 -6 -1 41.67 4.87
 0 -6 1 47.09 4.63
 0 -6 2 141.73 10.61
 0 -6 -2 145.16 10.45
 0 -6 2 143.63 10.06
 0 -6 -2 158.42 10.58
 0 -6 3 18.04 3.97
 0 -6 -3 27.22 3.93
 0 -6 3 24.04 3.85
 0 -6 -3 20.64 3.73
 0 -6 -4 21.73 3.78
 0 -6 4 27.41 3.82
 0 -6 -4 19.9 3.84
 0 -6 4 22.38 4.57
 0 -6 -5 38.42 4.86
 0 -6 5 39.96 5.5
 0 -6 -5 38.83 4.56
 0 -6 5 36.4 4.47
 0 -6 -6 97.72 7.97
 0 -6 -6 112.43 8.59
 0 -6 6 117.13 7.96
 0 -6 6 95.18 8.87
 0 -6 7 41.72 4.1
 0 -6 7 30.96 4.65
 0 -6 -7 30.6 4.34
 0 -6 -8 138.06 9.54
 0 -6 8 149.82 8.88
 0 -6 9 14.17 2.97
 0 -6 -9 17.34 2.73
 0 -6 -10 3.16 1.5
 0 -6 10 3.34 1.32
 0 -5 0 0.3 2.94
 0 -5 0 -0.31 2.69
 0 -5 0 -1.16 2.64
 0 -5 -1 549.94 33.64
 0 -5 1 585.87 33.72
 0 -5 -1 557.65 33.61
 0 -5 1 533.77 33.77
 0 -5 2 42.25 5.53
 0 -5 -2 60.24 6.09
 0 -5 2 61.33 6.2
 0 -5 -2 55.36 6.01
 0 -5 2 65.08 6.64
 0 -5 3 7.62 3.79
 0 -5 3 18.56 3.94
 0 -5 -3 15.3 3.93
 0 -5 3 16.05 4.78
 0 -5 -3 13.44 4.12
 0 -5 4 40.36 5.2
 0 -5 -4 32.45 5.08
 0 -5 4 33.99 6.06
 0 -5 -4 30.91 5.32
 0 -5 5 281.04 19.51
 0 -5 5 269.98 17.91
 0 -5 -5 291.55 18.81
 0 -5 -5 282.48 19.12
 0 -5 -6 559.07 34.15
 0 -5 -6 576.05 34.63
 0 -5 6 541.75 33.17
 0 -5 6 555.37 35.02
 0 -5 7 107.21 10.7
 0 -5 -7 117.07 10
 0 -5 -7 115.93 10.29
 0 -5 7 130.7 9.52
 0 -5 8 78.27 6.99
 0 -5 -8 61.94 7.06
 0 -5 -8 71.23 7.57
 0 -5 9 10.61 4.65
 0 -5 9 14 3.86
 0 -5 -9 7.36 3.54
 0 -5 10 24.76 4.53
 0 -5 10 24.59 3.84
 0 -5 -10 21.16 3.96
 0 -5 -10 27.37 4.54
 0 -5 -11 15.03 2.86
 0 -5 -11 16.34 3.38
 0 -5 11 14.54 3.38
 0 -5 -12 20.3 2.62
 0 -5 12 13.38 2.43
 0 -4 0 601.3 34.56
 0 -4 0 567.09 34.58
 0 -4 0 573.9 34.45
 0 -4 1 120.87 9.53
 0 -4 1 136.75 9.51
 0 -4 -1 126.28 9.19
 0 -4 -1 128.96 9.45
 0 -4 -1 131.4 9.44
 0 -4 -2 117.57 8.99
 0 -4 -2 108.23 8.61
 0 -4 2 112.58 8.04
 0 -4 2 113.45 8.68
 0 -4 2 129.3 9.44
 0 -4 3 185 13.67
 0 -4 -3 230.07 14.47
 0 -4 -3 220.9 14.52
 0 -4 -3 231.16 14.94
 0 -4 3 213.51 13.71
 0 -4 3 222.14 15.07
 0 -4 3 226.85 14.4
 0 -4 -4 229.32 15.54
 0 -4 4 237.04 14.83
 0 -4 4 212.77 15.02
 0 -4 4 250.62 16.49
 0 -4 -4 241.89 16.1
 0 -4 -4 256.07 16.17
 0 -4 4 253.88 15.61
 0 -4 -4 226.83 15.69
 0 -4 4 215.61 15.03
 0 -4 5 68.85 6.56
 0 -4 5 77.96 6.29
 0 -4 -5 80.42 7.2
 0 -4 5 73.27 6.9
 0 -4 -5 76.39 7.33
 0 -4 -5 70.71 7.53
 0 -4 5 76.53 7.9
 0 -4 -5 75.92 7.57
 0 -4 6 13.88 3.24
 0 -4 6 8.44 3.59
 0 -4 6 9.24 2.87
 0 -4 -6 5.98 4.11
 0 -4 -6 9.21 4.54
 0 -4 6 16.36 4.45
 0 -4 -6 11.21 4.46
 0 -4 -6 8.47 4.08
 0 -4 7 414.7 24.4
 0 -4 -7 408.47 25.43
 0 -4 7 361.02 24.83
 0 -4 -7 403.71 25.49
 0 -4 -7 381.24 25.59
 0 -4 7 346.59 24.58
 0 -4 7 433.4 24.22
 0 -4 -8 701.76 39.93
 0 -4 8 661.67 40.07
 0 -4 -8 699.73 39.79
 0 -4 8 559.82 38.86
 0 -4 8 576.19 38.99
 0 -4 8 701.06 38.44
 0 -4 -9 138.18 10.92
 0 -4 9 106.46 9.69
 0 -4 -9 138.6 11.04
 0 -4 9 132.31 11.17
 0 -4 -9 113.54 10.62
 0 -4 9 117.87 10.08
 0 -4 10 43.41 5.45
 0 -4 10 53.41 6.83
 0 -4 -10 57.82 6.76
 0 -4 -10 60.03 6.9
 0 -4 -10 49.78 6.88
 0 -4 10 42.99 5.87
 0 -4 11 24.58 4.86
 0 -4 11 21 3.83
 0 -4 -11 22.42 4.44
 0 -4 11 25.48 4.52
 0 -4 -11 22.26 4.98
 0 -4 -12 151.63 9.38
 0 -4 12 120.28 9.19
 0 -4 -12 126.02 9.37
 0 -4 -13 11.88 2.86
 0 -4 -13 11.64 2.39
 0 -4 -13 11.19 3.33
 0 -4 13 10.4 2.5
 0 -4 -14 50.38 3.95
 0 -3 0 0.18 2.2
 0 -3 -1 512.71 30.3
 0 -3 1 558.12 30.68
 0 -3 1 526.33 30.33
 0 -3 -1 476.86 30.31
 0 -3 -2 951.21 51.79
 0 -3 -2 937.28 51.58
 0 -3 -2 898.45 51.42
 0 -3 2 818.66 51.16
 0 -3 2 920.62 51.88
 0 -3 2 891.64 51.38
 0 -3 -2 878.46 51.66
 0 -3 -3 362.64 21.3
 0 -3 3 367.18 21.72
 0 -3 3 333.29 20.64
 0 -3 3 350.26 20.99
 0 -3 3 313.67 20.89
 0 -3 -3 328.89 21.29
 0 -3 -3 354 21.06
 0 -3 3 369.35 20.92
 0 -3 -3 367.81 21.55
 0 -3 4 53.36 4.66
 0 -3 -4 49.87 4.69
 0 -3 -4 53.7 5.3
 0 -3 4 41.1 4.52
 0 -3 4 53.13 5.48
 0 -3 4 51.67 4.77
 0 -3 4 53.68 4.79
 0 -3 -4 58.61 5.3
 0 -3 4 50 4.43
 0 -3 -4 46.75 4.32
 0 -3 -4 52.79 5.18
 0 -3 4 54.59 4.46
 0 -3 5 66.72 6.14
 0 -3 -5 80.86 6.68
 0 -3 5 78 6.46
 0 -3 -5 79.18 6.96
 0 -3 -5 81.09 6.51
 0 -3 5 77.64 6.57
 0 -3 5 87.47 6.19
 0 -3 5 77.98 7.94
 0 -3 -5 79.01 6.91
 0 -3 5 80.85 6.31
 0 -3 -5 84.48 6.3
 0 -3 6 99.08 8.75
 0 -3 -6 101.21 8.35
 0 -3 6 93.83 7.6
 0 -3 6 115.06 7.65
 0 -3 6 97.54 7.95
 0 -3 -6 99.6 8.23
 0 -3 6 95.94 7.98
 0 -3 -6 98.1 7.72
 0 -3 7 45.09 6.27
 0 -3 -7 51.56 6
 0 -3 -7 52.17 6.13
 0 -3 7 59.19 5.38
 0 -3 7 53.77 5.74
 0 -3 -7 59.47 6.35
 0 -3 7 48.45 5.65
 0 -3 8 186.92 12.76
 0 -3 -8 148.74 11.87
 0 -3 8 155.39 12.12
 0 -3 -8 154.49 12.33
 0 -3 8 155.42 11.85
 0 -3 -8 159.95 12.12
 0 -3 9 3.43 3.83
 0 -3 -9 1.92 4.08
 0 -3 9 6.14 4.34
 0 -3 -9 2.64 4.2
 0 -3 -9 3.19 3.94
 0 -3 9 0.22 3.59
 0 -3 -10 41.59 5.78
 0 -3 10 43.97 5.47
 0 -3 10 37 5.79
 0 -3 -10 35.69 6.19
 0 -3 10 40.17 6.09
 0 -3 -10 28.19 6.27
 0 -3 -10 33.48 6.31
 0 -3 -11 194.55 14.44
 0 -3 11 189.59 14.28
 0 -3 -11 192.71 14.59
 0 -3 11 194.2 14.36
 0 -3 11 184.3 14.15
 0 -3 -11 199.83 14.54
 0 -3 -11 194.48 13.85
 0 -3 -12 0.76 4.04
 0 -3 -12 2.6 3.02
 0 -3 -12 4.52 4.45
 0 -3 12 3.97 3.48
 0 -3 12 1.67 3.82
 0 -3 -12 0.78 2.98
 0 -3 12 3.59 3.45
 0 -3 -13 109.82 8.49
 0 -3 13 113.42 9
 0 -3 -13 116.95 9.42
 0 -3 13 101.07 8.38
 0 -3 -13 118.61 8.42
 0 -3 -13 134.26 9.84
 0 -3 13 112.83 9.05
 0 -3 14 163.57 12.05
 0 -3 14 182.31 12.16
 0 -3 15 7.03 1.73
 0 -3 -15 10.71 2.42
 0 -2 1 449.41 25.89
 0 -2 -2 790.36 44.11
 0 -2 2 767.98 44
 0 -2 2 744.66 44.93
 0 -2 -3 316.55 18.3
 0 -2 3 301.25 19.19
 0 -2 3 294.45 18.11
 0 -2 4 1349.35 74.23
 0 -2 -4 1403.66 73.14
 0 -2 -4 1253.18 71.61
 0 -2 -5 75.45 5.87
 0 -2 5 71.36 5.66
 0 -2 5 73.35 6.88
 0 -2 -5 60 5.68
 0 -2 5 72.53 5.27
 0 -2 -5 77.81 6.25
 0 -2 -5 70.66 4.89
 0 -2 5 66.27 5.56
 0 -2 5 71.79 5.88
 0 -2 -5 69.53 6.01
 0 -2 -5 66.15 5.83
 0 -2 6 72.52 6.06
 0 -2 -6 98.05 7.1
 0 -2 6 87.02 6.98
 0 -2 6 84.48 6.76
 0 -2 -6 82.02 6.86
 0 -2 -6 82.25 5.87
 0 -2 6 82.24 7.95
 0 -2 6 81.26 6.36
 0 -2 -6 80.04 7.07
 0 -2 6 93.45 6.32
 0 -2 -6 75.19 6.54
 0 -2 7 91.65 6.46
 0 -2 -7 84.15 7.28
 0 -2 -7 82.35 7.14
 0 -2 7 83.55 6.39
 0 -2 7 77.11 6.85
 0 -2 -7 72.69 6.97
 0 -2 7 69.57 6.4
 0 -2 7 87.72 7.06
 0 -2 -7 78.12 6.69
 0 -2 8 214.3 14.63
 0 -2 8 209.62 14.32
 0 -2 -8 197.4 14.16
 0 -2 -8 215.88 14.68
 0 -2 8 226.14 13.73
 0 -2 -8 210.27 14.58
 0 -2 8 206.65 14.18
 0 -2 8 211.47 14.48
 0 -2 -8 218.17 14.68
 0 -2 -9 16.11 4.75
 0 -2 -9 17.17 3.95
 0 -2 9 14.82 4.03
 0 -2 9 21.59 4.32
 0 -2 -9 16.49 4.42
 0 -2 -9 13.39 4.93
 0 -2 9 17.88 4.21
 0 -2 9 15.62 3.43
 0 -2 9 14.84 3.93
 0 -2 10 310.06 20.68
 0 -2 -10 291.76 20.96
 0 -2 10 394.6 20.08
 0 -2 10 299.44 21.07
 0 -2 10 312.81 20.87
 0 -2 -10 301.39 20.37
 0 -2 10 297.52 20.51
 0 -2 -10 311.63 21.13
 0 -2 -10 327.33 21.11
 0 -2 -11 3.04 4.83
 0 -2 11 1.57 3.73
 0 -2 11 1.98 3.81
 0 -2 11 2.83 2.97
 0 -2 -11 3.11 4.56
 0 -2 -11 -0.63 2.95
 0 -2 -11 0.2 3.88
 0 -2 11 -1.81 3.16
 0 -2 -11 0.8 3.85
 0 -2 12 111.4 9.44
 0 -2 12 94.47 8.67
 0 -2 -12 119.75 10.26
 0 -2 -12 114.76 9.45
 0 -2 -12 124.82 10.17
 0 -2 -12 110.76 8.54
 0 -2 12 111.58 9.82
 0 -2 -12 115.48 9.55
 0 -2 12 99.03 8.52
 0 -2 13 8.28 3.09
 0 -2 -13 13.92 3.96
 0 -2 13 15.37 4.41
 0 -2 13 12.53 4.02
 0 -2 -13 10.48 4.54
 0 -2 -13 7.14 5.05
 0 -2 14 20.76 3.64
 0 -2 -14 24 4.49
 0 -2 -14 27.23 5.05
 0 -2 14 21.36 3.39
 0 -2 14 23.02 4.54
 0 -2 -15 65.75 5.65
 0 -2 15 59.14 5.08
 0 -2 -15 64.43 6.12
 0 -2 15 63.53 5.94
 0 -2 16 11.67 2.29
 0 -2 -16 11.39 2.58
 0 -1 -1 6426.44 361.43
 0 -1 -1 6474.41 361.12
 0 -1 1 6268.05 361.8
 0 -1 1 6398.36 361.41
 0 -1 1 6891.93 361.92
 0 -1 -2 1881.45 104.14
 0 -1 -2 1902.9 103.76
 0 -1 -2 1819.88 103.68
 0 -1 2 1867.72 104.67
 0 -1 -2 1868.16 103.69
 0 -1 -2 1822.59 103.54
 0 -1 2 1915.3 104.6
 0 -1 -3 1110.63 62.04
 0 -1 -3 1070.98 62.01
 0 -1 -3 1112.03 61.82
 0 -1 3 1033.07 63.03
 0 -1 3 1061.37 62.12
 0 -1 3 1159.29 62.97
 0 -1 -3 1157.83 62.46
 0 -1 -4 1587.01 87.12
 0 -1 -4 1555.83 86.43
 0 -1 -4 1539.5 86.74
 0 -1 4 1536.58 86.83
 0 -1 4 1574.67 87.73
 0 -1 -4 1427.69 86.7
 0 -1 -4 1558.99 86.69
 0 -1 5 63.75 5.14
 0 -1 -5 70 5.21
 0 -1 -5 64.86 5.18
 0 -1 -5 70.03 5.45
 0 -1 -5 65.68 5.07
 0 -1 5 70.19 6.44
 0 -1 -6 2235.83 118.48
 0 -1 6 2433.16 117.49
 0 -1 6 2089.54 118.12
 0 -1 -6 1928.44 117.88
 0 -1 -6 2071.58 117.93
 0 -1 -6 1865.09 117.66
 0 -1 6 2036.8 117.05
 0 -1 6 2015.57 117.62
 0 -1 -6 2094.41 118.03
 0 -1 -7 290.38 17.74
 0 -1 -7 278.18 17.76
 0 -1 7 288.76 17.37
 0 -1 -7 265.4 17.58
 0 -1 7 277.34 17.31
 0 -1 7 260.94 16.92
 0 -1 7 258.12 17.04
 0 -1 -7 274.62 17.54
 0 -1 -7 260.18 17.03
 0 -1 7 290.04 17.94
 0 -1 -7 288.28 17.7
 0 -1 7 278.47 17.2
 0 -1 7 310.2 16.74
 0 -1 -7 292.95 17.09
 0 -1 -7 276.79 17.72
 0 -1 8 357.96 23.97
 0 -1 -8 409.47 24.73
 0 -1 8 389.48 24.33
 0 -1 -8 417.67 25.25
 0 -1 8 412.34 24.59
 0 -1 -8 403.77 24.82
 0 -1 -8 382.55 24.91
 0 -1 8 369.12 24.24
 0 -1 8 378.5 24.28
 0 -1 -8 428.21 25.04
 0 -1 -8 377.22 24.11
 0 -1 8 394.68 25.16
 0 -1 9 46.77 5.03
 0 -1 -9 55.48 4.96
 0 -1 -9 57.14 6.16
 0 -1 9 55.59 5.45
 0 -1 -9 57.14 6.42
 0 -1 9 53.64 5.13
 0 -1 -9 50.1 5.56
 0 -1 9 59.6 5.39
 0 -1 -10 119.89 9.79
 0 -1 -10 103.25 8.46
 0 -1 10 97.41 8.12
 0 -1 10 98.34 8.27
 0 -1 -10 98.91 9.13
 0 -1 10 96.79 8.04
 0 -1 -10 102.69 7.71
 0 -1 11 169.64 13.19
 0 -1 11 201.52 13.81
 0 -1 -11 200.36 13.63
 0 -1 -11 199.43 14.31
 0 -1 -11 216.01 15.03
 0 -1 11 194.3 13.77
 0 -1 -12 119.5 9.61
 0 -1 -12 104.92 9.95
 0 -1 -12 110.61 8.49
 0 -1 12 104.67 8.98
 0 -1 12 108.98 8.89
 0 -1 12 86.53 8.19
 0 -1 13 380.61 25.03
 0 -1 -13 425.57 25.36
 0 -1 13 393.53 25.94
 0 -1 -13 405.61 25.83
 0 -1 13 374.02 24.58
 0 -1 14 10.88 2.96
 0 -1 -14 12.8 3.6
 0 -1 14 13.26 3.56
 0 -1 -14 19.08 5.4
 0 -1 -14 7.3 4.83
 0 -1 14 16.56 4.6
 0 -1 -15 5.02 2.54
 0 -1 -15 4.34 4.29
 0 -1 -15 6.7 3.56
 0 -1 15 5.98 2.62
 0 -1 15 4.74 3.57
 0 -1 -16 11.52 2.54
 0 -1 16 13.96 2.37
 0 -1 16 14.61 3.12
 0 -1 -16 20.08 3.48
 0 0 -1 914.23 51.38
 0 0 -2 2990.49 177.27
 0 0 2 3259.38 177.3
 0 0 2 3248.12 177.5
 0 0 -2 3111.44 177.26
 0 0 -2 3294.93 177.5
 0 0 -3 317.45 18.01
 0 0 -3 339.06 18.33
 0 0 -3 324.38 18.03
 0 0 3 334.19 18.07
 0 0 3 349.96 18.4
 0 0 -3 293.58 17.87
 0 0 4 421.09 23.4
 0 0 -4 372.64 22.74
 0 0 4 416.28 23.03
 0 0 -4 379.1 22.93
 0 0 -4 357.28 23.16
 0 0 -4 397.08 22.92
 0 0 5 772.19 41.4
 0 0 -5 693.94 40.71
 0 0 5 751.57 40.93
 0 0 -5 718.16 41.27
 0 0 -5 656.57 41.09
 0 0 -5 669.33 40.74
 0 0 -5 685.5 40.53
 0 0 -6 515.71 32.03
 0 0 -6 519.7 32.53
 0 0 -6 540.78 32.02
 0 0 6 562.76 32.19
 0 0 6 605.81 32.9
 0 0 -6 519.23 31.66
 0 0 7 97.6 6.55
 0 0 -7 87.93 6.75
 0 0 7 97.59 7.38
 0 0 -7 89.84 7.66
 0 0 -7 85.07 7.18
 0 0 -7 81.08 7.02
 0 0 7 98.61 8.04
 0 0 -7 94.39 7.23
 0 0 7 87.93 6.49
 0 0 7 97.14 6.37
 0 0 -7 80.18 7.14
 0 0 -7 69.21 7.27
 0 0 8 35.61 3.64
 0 0 -8 28.4 3.76
 0 0 -8 24.87 4.51
 0 0 -8 28.77 3.91
 0 0 8 30.55 4.53
 0 0 -8 33.02 5.36
 0 0 8 32.79 3.52
 0 0 8 36.21 4.25
 0 0 8 28.71 3.34
 0 0 -8 30.67 3.56
 0 0 8 29.58 3.26
 0 0 -8 24.78 4.61
 0 0 -8 26.18 4.13
 0 0 -9 88.49 6.82
 0 0 -9 83.16 7.29
 0 0 9 85.69 6.95
 0 0 -9 81.39 8.03
 0 0 9 84.27 6.61
 0 0 9 84.06 6.88
 0 0 -9 76.62 8.13
 0 0 9 82.46 6.73
 0 0 -10 49.04 5.37
 0 0 10 49.01 5.15
 0 0 10 50.97 5.27
 0 0 -10 53.91 5.4
 0 0 10 49.86 5.03
 0 0 -10 53.15 7.13
 0 0 10 55.11 5.16
 0 0 -10 49.93 5.94
 0 0 -10 66.21 7.65
 0 0 -11 67.61 8.35
 0 0 11 55.15 6.18
 0 0 11 56.81 5.85
 0 0 -11 61.68 6.52
 0 0 -11 60.67 5.82
 0 0 11 55.62 5.52
 0 0 11 49.38 5.48
 0 0 11 60.29 5.14
 0 0 12 283.38 19.6
 0 0 -12 356.09 22.33
 0 0 12 323.61 19.45
 0 0 12 309 20.37
 0 0 12 334.07 20.77
 0 0 12 288.56 19.87
 0 0 -12 323.87 20.48
 0 0 -13 219.39 15.58
 0 0 13 197.9 14.03
 0 0 13 175.2 13.35
 0 0 13 174.11 12.26
 0 0 -13 199.32 13.26
 0 0 14 178.53 13.01
 0 0 14 185.82 13.54
 0 0 -14 197.93 14.84
 0 0 -15 0.18 4.71
 0 0 15 2.48 3.05
 0 0 15 0.37 3.55
 0 0 16 8.6 2.64
 0 0 -16 11.73 3.4
 0 0 16 10.49 3.1
 0 0 -16 12.98 3.49
 0 0 -17 33.72 3.23
 0 0 17 26.92 2.89
 0 1 0 -0.2 0.62
 0 1 0 -0.16 0.53
 0 1 0 -0.09 1.07
 0 1 0 0.2 1.02
 0 1 0 -0.02 0.68
 0 1 0 -0.08 0.68
 0 1 0 0.82 1.5
 0 1 -1 6210.89 349.24
 0 1 1 6305.42 349.01
 0 1 -1 6229.73 349.01
 0 1 1 6223.85 348.92
 0 1 1 6337.77 349.23
 0 1 -1 6190.4 349.57
 0 1 -1 6300.85 349.58
 0 1 -1 6168.48 349.57
 0 1 -2 1740.75 97.73
 0 1 -2 1505.65 97.73
 0 1 2 1856.95 97.03
 0 1 -2 1777.36 97.02
 0 1 -2 1764.57 97.32
 0 1 -2 1482.86 97.66
 0 1 3 1125.78 61.93
 0 1 3 1089.6 61.53
 0 1 -3 1033.63 61.87
 0 1 -3 1076.27 61.56
 0 1 -3 1109.69 62.01
 0 1 3 1115.86 61.97
 0 1 4 1538.88 86.47
 0 1 -4 1448.72 86.79
 0 1 4 1580.6 86.98
 0 1 4 1591.37 86.91
 0 1 -4 1499.56 87
 0 1 -5 69.45 6.2
 0 1 -5 68.74 5.85
 0 1 -5 63.94 5
 0 1 5 60.05 5.35
 0 1 5 74.76 5.6
 0 1 -5 61.93 5.35
 0 1 6 2345.82 120.35
 0 1 -6 2197.89 119.46
 0 1 -6 2034.45 119.55
 0 1 -6 2026.61 120.44
 0 1 6 1954.42 119.9
 0 1 -6 2139.21 121.04
 0 1 -7 257.55 17.89
 0 1 7 302.57 17.2
 0 1 -7 279.11 17.83
 0 1 7 290 17.23
 0 1 -7 280.78 18.93
 0 1 -7 298.37 17.9
 0 1 7 283.52 17.09
 0 1 -7 259.74 17.41
 0 1 -7 287.3 19.39
 0 1 -8 478.94 25.67
 0 1 8 385.01 24.4
 0 1 -8 396.36 25.22
 0 1 -8 362.29 24.5
 0 1 -8 461.48 25.92
 0 1 -8 408.52 25.31
 0 1 8 421.24 24.43
 0 1 8 381.48 24.25
 0 1 8 473.8 26.59
 0 1 -9 56.84 6.81
 0 1 9 64.69 5.28
 0 1 9 51.34 4.96
 0 1 -9 45.76 7.68
 0 1 -9 54.99 6.88
 0 1 -10 79.87 10.43
 0 1 10 118.82 8.35
 0 1 -10 102.25 10.25
 0 1 -10 89.6 10.04
 0 1 -10 88.19 9.72
 0 1 -10 88.12 7.97
 0 1 10 102.83 7.99
 0 1 -11 208.45 17.09
 0 1 -11 197.85 16.75
 0 1 11 224.7 15.24
 0 1 11 247.11 15.91
 0 1 -11 266.83 18.31
 0 1 12 140.77 9.53
 0 1 -12 124.34 10.14
 0 1 12 113.99 10.28
 0 1 -12 139.24 12.42
 0 1 12 121.2 9.96
 0 1 -12 131.29 10.12
 0 1 12 132.62 10.52
 0 1 12 135.65 9.63
 0 1 -12 120.55 12.31
 0 1 13 455.47 26.25
 0 1 13 417.6 25.77
 0 1 13 445.89 27.34
 0 1 -13 427.91 26.29
 0 1 13 395.35 26.43
 0 1 13 429.56 27.11
 0 1 -13 443.74 28.52
 0 1 -13 412.98 25.96
 0 1 14 14.81 2.75
 0 1 14 15.21 3.91
 0 1 14 14.67 4.19
 0 1 -14 14.6 3.73
 0 1 -14 22.14 6.86
 0 1 15 8.85 3.43
 0 1 15 7.7 3.44
 0 1 15 11.08 3.08
 0 1 -15 7.88 5.36
 0 1 15 7.7 2.01
 0 1 16 13.39 2.84
 0 1 16 12.97 2.9
 0 1 -16 9.38 3.77
 0 2 0 1573.35 94.65
 0 2 0 1738.58 93.87
 0 2 0 1637.72 93.62
 0 2 0 1730.01 93.99
 0 2 1 470.14 25.72
 0 2 -1 390.16 26.17
 0 2 -1 470.4 25.67
 0 2 1 477.13 26.03
 0 2 -1 467.72 26.78
 0 2 1 445.95 25.98
 0 2 1 445.61 25.76
 0 2 -1 431.81 26.04
 0 2 1 467.71 26.67
 0 2 -1 451.6 26.89
 0 2 -2 782.26 43.82
 0 2 -2 746.79 43.1
 0 2 2 740.83 42.53
 0 2 2 783.92 43.08
 0 2 -2 749.55 42.38
 0 2 -2 765.94 43.05
 0 2 -2 719.25 43.75
 0 2 -3 321.82 18.26
 0 2 -3 296.17 18.09
 0 2 -3 294.37 18.88
 0 2 3 282.82 17.99
 0 2 3 307.12 18.1
 0 2 3 298.7 17.54
 0 2 -4 1345.57 77.23
 0 2 -4 1357.67 78.12
 0 2 4 1464.9 77.29
 0 2 4 1335.21 77.05
 0 2 -4 1250.48 76.25
 0 2 4 1413.65 76.55
 0 2 -4 1393.37 77.24
 0 2 -5 70.53 6.77
 0 2 -5 69.24 5.15
 0 2 5 72.51 5.37
 0 2 5 74.52 5.89
 0 2 -5 71.86 6.02
 0 2 -5 71.49 6.14
 0 2 5 84.73 6.21
 0 2 -6 80.5 7.9
 0 2 6 88.83 5.92
 0 2 -6 79.86 6.95
 0 2 -6 78.76 7.17
 0 2 6 93.61 7.19
 0 2 6 93.77 6.94
 0 2 -6 72.85 6.8
 0 2 -6 82.47 6.12
 0 2 -6 86.71 6.32
 0 2 7 81.56 6.1
 0 2 -7 79.29 6.61
 0 2 -7 78.98 7.63
 0 2 -7 94.47 7.21
 0 2 7 96.35 6.43
 0 2 -8 200.21 13.88
 0 2 8 218.46 13.45
 0 2 -8 234.83 14.6
 0 2 8 200.18 13.27
 0 2 8 205.78 13.27
 0 2 -9 12.92 5.55
 0 2 -9 17.29 5.65
 0 2 9 20.68 3.42
 0 2 -9 18.65 5.06
 0 2 9 18.35 3.1
 0 2 10 314.41 19.8
 0 2 10 350.51 20.48
 0 2 -10 271.53 20.8
 0 2 -10 322.25 21.8
 0 2 11 2.98 3.16
 0 2 -11 5.34 5.69
 0 2 11 -0.79 3.54
 0 2 -11 3.24 6.22
 0 2 -12 113.76 12.14
 0 2 12 141.28 10.74
 0 2 12 125.73 10.23
 0 2 13 15.71 3.27
 0 2 13 13.06 3.99
 0 2 13 10 3.53
 0 2 13 11.87 2.91
 0 2 13 14.42 4.14
 0 2 -13 16.84 5.01
 0 2 -14 21.54 4.31
 0 2 14 25.32 4.21
 0 2 14 25.03 4.29
 0 2 -14 24.13 4.51
 0 2 14 26 3.47
 0 2 14 22.94 3.19
 0 2 14 23.08 3.86
 0 2 15 49.86 5.21
 0 2 -15 60.23 5.27
 0 2 15 65.39 5.83
 0 2 15 65.71 5.06
 0 2 15 64.47 5.77
 0 2 -16 13 2.41
 0 2 16 14.93 2.33
 0 2 16 14.49 2.45
 0 3 0 -0.11 0.47
 0 3 0 1.35 1.35
 0 3 1 577.63 31.16
 0 3 1 564.81 31.23
 0 3 -1 526.87 32.33
 0 3 -1 556.92 31.37
 0 3 1 503.17 31.91
 0 3 1 537.29 30.64
 0 3 -1 523.03 30.74
 0 3 2 927.96 52.14
 0 3 2 1018.18 52.62
 0 3 2 780.63 52.78
 0 3 -2 923.44 52.66
 0 3 2 942.97 52.02
 0 3 -2 884.81 52.34
 0 3 -3 347.08 20.88
 0 3 3 370.96 20.37
 0 3 3 401.28 21.2
 0 3 -3 380.39 21.23
 0 3 -3 356.8 21.06
 0 3 -3 379.7 22.28
 0 3 3 348.53 20.32
 0 3 3 346.24 20.66
 0 3 -4 50.19 5.67
 0 3 -4 56.16 5
 0 3 4 64.91 5.13
 0 3 -4 55.83 4.97
 0 3 -4 52.31 4.98
 0 3 -5 76.61 6.6
 0 3 5 87.91 6.84
 0 3 -5 69.5 6.67
 0 3 -5 80.68 6.86
 0 3 -5 87.03 6.86
 0 3 -6 108.93 7.77
 0 3 7 56.01 4.67
 0 3 -7 62.59 5.9
 0 3 -7 51.59 5.14
 0 3 8 162.57 10.62
 0 3 -8 139.61 10.92
 0 3 -8 178.44 11.89
 0 3 9 -0.15 2.43
 0 3 -9 4.93 4.36
 0 3 -9 1.74 5.28
 0 3 9 1.18 1.97
 0 3 -10 38.04 7.18
 0 3 -10 42.64 8.99
 0 3 10 42.94 4.92
 0 3 -10 34.17 6.1
 0 3 10 31.26 3.92
 0 3 -10 38.06 7.28
 0 3 -11 186.36 15.34
 0 3 -11 154.95 14.14
 0 3 -11 197.74 15.4
 0 3 -11 173.9 16.05
 0 3 11 206.01 13.74
 0 3 11 236.68 14
 0 3 12 3.92 3.04
 0 3 -12 5.54 6.11
 0 3 12 5.05 3.13
 0 3 -12 16.47 8.15
 0 3 -12 5.13 5.58
 0 3 -13 135.35 10.7
 0 3 13 129.88 10.21
 0 3 13 155.88 10.15
 0 3 -13 154.54 12.18
 0 3 13 124.64 10.05
 0 3 -13 146.97 11.09
 0 3 -13 148.86 11.95
 0 3 -14 216.09 14.8
 0 3 14 182.24 13.35
 0 3 14 226.85 13.37
 0 3 -14 206.94 13.73
 0 3 -14 211.77 13.62
 0 3 14 222.84 13.47
 0 3 14 194.68 13.58
 0 3 15 11.76 1.92
 0 3 -15 17.44 3.69
 0 3 15 10 1.65
 0 3 15 7.85 2.34
 0 3 -15 8.94 2.44
 0 3 15 9.66 2.18
 0 4 -7 414.42 25.62
 0 4 -8 762.2 42.46
 0 4 -8 651.23 41.34
 0 4 -9 155.78 12.47
 0 4 9 151.85 10.82
 0 4 -9 131.71 11.16
 0 4 -9 154.37 12.22
 0 4 -10 59.88 9.38
 0 4 -10 56.55 7.44
 0 4 -10 49.61 6.27
 0 4 10 58.29 5.55
 0 4 -10 59.03 8.01
 0 4 10 72.18 6.06
 0 4 11 27.08 3.9
 0 4 -11 20.57 5.45
 0 4 -11 24.15 5.9
 0 4 -11 17.09 7.31
 0 4 11 23.75 3.62
 0 4 11 33.28 4.66
 0 4 -12 130.91 11.41
 0 4 12 122.36 9.1
 0 4 12 139.23 9.73
 0 4 -12 133.93 10.36
 0 4 -12 125.7 10.59
 0 4 12 123.35 9.07
 0 4 -13 14.68 4.14
 0 4 13 13.12 2.83
 0 4 13 17.19 2.74
 0 4 -13 18.8 4.26
 0 4 13 11.55 2.5
 0 4 -13 20.13 3.98
 0 4 13 13.31 2.41
 0 4 14 77.29 5.55
 0 4 14 75.79 5.15
 0 4 -14 78.26 5.5
 0 4 -14 63.39 5.38
 0 4 -14 62.08 5.42
 0 5 -8 66.02 7.1
 0 5 -8 84.95 8.69
 0 5 9 7.18 2.26
 0 5 -9 10.23 4.37
 0 5 -9 5.36 5.6
 0 5 -10 24.53 4.58
 0 5 -10 23.4 5.79
 0 5 10 29.38 3.61
 0 5 10 25.9 3.13
 0 5 11 15.27 2.26
 0 5 -11 22.68 4.85
 0 5 11 15.64 2.36
 0 5 -11 18.8 3.69
 0 5 11 15.83 2.65
 0 5 -12 16.39 3.33
 0 5 12 15.29 1.88
 0 5 -12 22.35 3.6
 0 5 12 19.92 2.14
 0 5 12 18.05 2.26
 0 6 -6 124.17 9.31
 0 6 -7 26.29 4.23
 0 6 -9 14.35 2.81
 0 6 -10 4.75 2.02
 -1 -7 5 82.87 5.73
 -1 -7 4 74.31 5.28
 1 -7 2 8.93 1.9
 1 -7 3 60.55 4.32
 1 -7 4 80.68 5.27
 1 -6 -10 33.52 3.21
 -1 -6 10 27.45 2.82
 -1 -6 9 36.55 4.52
 1 -6 -9 41.59 3.9
 -1 -6 8 30 4.4
 1 -6 -8 38.28 4.31
 1 -6 -8 27.82 3.91
 -1 -6 8 37.47 3.64
 1 -6 -7 187.36 12.65
 1 -6 -7 176.07 12.59
 -1 -6 7 166.63 12.96
 -1 -6 7 203.81 11.92
 1 -6 -6 114.71 8.76
 -1 -6 6 119.7 8.13
 -1 -6 6 104.46 9.26
 1 -6 -6 107.74 8.84
 -1 -6 5 89.05 6.63
 1 -6 -5 76.04 7.2
 -1 -6 5 76.54 7.69
 1 -6 -5 82.51 7.07
 1 -6 -4 25.35 3.97
 -1 -6 4 23.14 4.66
 -1 -6 4 35.82 3.93
 1 -6 -4 24.09 4.23
 -1 -6 3 129.46 8.6
 -1 -6 3 110.05 9.28
 1 -6 -3 116.4 9.33
 1 -6 -3 123.34 9.01
 -1 -6 2 47.33 5.09
 -1 -6 2 48.75 4.59
 -1 -6 1 138.45 9.35
 -1 -6 1 143.65 9.88
 -1 -6 1 129.95 9.67
 1 -6 -1 158.1 10.57
 1 -6 -1 133.58 9.74
 1 -6 0 14.9 3.51
 1 -6 0 21.15 4
 -1 -6 0 15.51 2.75
 1 -6 1 193.7 12.67
 1 -6 1 161.54 11.98
 -1 -6 -1 194.6 12.56
 1 -6 2 87.11 7.65
 1 -6 2 93.53 7.45
 -1 -6 -2 96.16 7.69
 1 -6 3 28.49 4.13
 -1 -6 -3 26.07 4.24
 1 -6 3 33.09 4.69
 1 -6 4 54.99 5.37
 -1 -6 -4 54.82 5.85
 1 -6 4 48.28 6.14
 -1 -6 -5 5.13 3.42
 1 -6 5 6.7 3.81
 1 -6 5 15.38 3.41
 1 -6 6 29.42 4.93
 1 -6 6 42.1 4.54
 -1 -6 -6 34.26 4.66
 -1 -6 -7 5.43 3.12
 1 -6 7 14.94 2.97
 1 -6 7 5.33 3.47
 1 -6 8 35.04 3.47
 1 -6 8 22.92 3.88
 -1 -6 -8 32.68 3.96
 -1 -6 -9 16.27 2.52
 1 -6 9 10.69 2.52
 1 -5 -12 24.25 3.02
 -1 -5 12 21.17 2.99
 1 -5 -12 27.3 3.35
 1 -5 -11 92.4 7.49
 -1 -5 11 78.09 7.43
 -1 -5 10 58.01 5.37
 1 -5 -10 53.84 6.12
 -1 -5 10 46.07 5.91
 -1 -5 9 200.05 11.69
 1 -5 -9 182.51 12.78
 1 -5 -9 134.26 12.28
 -1 -5 9 143.5 12.57
 1 -5 -8 88.6 9.07
 1 -5 -8 101.88 9.51
 -1 -5 8 115.36 8.42
 1 -5 -7 85.14 8.38
 -1 -5 7 83.86 9.3
 1 -5 -7 87.01 8.49
 -1 -5 7 87.26 7.54
 1 -5 -6 44.32 6.22
 1 -5 -6 45.11 6.29
 -1 -5 6 38.35 6.71
 -1 -5 6 53.64 5.6
 1 -5 -5 196.42 13.8
 -1 -5 5 171.7 12.51
 1 -5 -5 200.99 13.86
 -1 -5 5 185.64 14.3
 -1 -5 4 152.78 12.31
 -1 -5 4 149.89 10.87
 1 -5 -4 154.14 11.82
 1 -5 -4 167.89 12.05
 -1 -5 3 196.9 12.8
 -1 -5 3 183.62 13.67
 1 -5 -3 180.39 13.26
 -1 -5 3 178.03 12.4
 1 -5 -3 183.94 13.22
 -1 -5 2 189.71 12.22
 1 -5 -2 178.31 12.38
 -1 -5 2 157.3 11.67
 -1 -5 2 173.53 12.79
 1 -5 -2 175.4 12.63
 -1 -5 1 369.12 21.8
 1 -5 -1 359.66 22.22
 -1 -5 1 330.89 21.66
 1 -5 -1 377.26 21.94
 -1 -5 1 358.54 22.18
 -1 -5 1 309.89 21.11
 1 -5 0 48.66 5.6
 -1 -5 0 46.74 4.96
 1 -5 0 41.7 4.88
 -1 -5 0 33.05 4.47
 -1 -5 0 39.35 4.97
 -1 -5 -1 47.42 4.66
 1 -5 1 46.82 5.46
 -1 -5 -1 44.33 5.64
 -1 -5 -1 54.48 5.38
 1 -5 1 51.77 5.97
 1 -5 2 84.2 6.75
 1 -5 2 91.76 7.96
 1 -5 2 87.77 8.12
 -1 -5 -2 74.14 7.08
 -1 -5 -2 90.18 8.01
 1 -5 3 149.24 10.08
 -1 -5 -3 146.33 11.43
 1 -5 3 129.94 10.6
 -1 -5 -3 135.34 10.54
 1 -5 3 164.86 11.35
 1 -5 3 147.31 11.78
 -1 -5 -4 213 15.31
 -1 -5 -4 233.04 16.44
 1 -5 4 244.17 14.88
 1 -5 4 229.38 16.8
 1 -5 4 230.2 15.38
 1 -5 5 74.86 8.32
 -1 -5 -5 67.33 7.45
 1 -5 5 60.62 6.64
 1 -5 5 70.95 5.82
 -1 -5 -5 54.57 6.23
 1 -5 6 6.84 2.86
 -1 -5 -6 6.49 4.85
 -1 -5 -6 4.97 3.43
 1 -5 6 10.87 4.16
 1 -5 6 1.33 2.89
 1 -5 6 1.93 5.15
 1 -5 7 20.83 5.01
 -1 -5 -7 20.78 4.47
 -1 -5 -7 22.93 5.6
 1 -5 7 24.41 5.88
 1 -5 7 18.96 3.92
 1 -5 8 131.7 10.63
 -1 -5 -8 138.04 10.79
 -1 -5 -9 28.12 4.96
 -1 -5 -9 28.24 4.3
 1 -5 9 24.23 5.42
 -1 -5 -10 110.82 8.52
 1 -5 10 119.42 9.45
 -1 -5 -11 151.75 9.46
 1 -5 11 117.87 9.33
 1 -5 12 12.84 2.17
 -1 -5 -12 30.08 2.54
 1 -4 -14 9.54 2.3
 1 -4 -13 6.55 3.14
 -1 -4 13 5.31 2.17
 1 -4 -13 5.49 2.58
 -1 -4 13 5.43 2.44
 -1 -4 12 62.85 6.44
 -1 -4 12 64.01 6.16
 1 -4 -12 76.35 6.64
 1 -4 -12 71.38 7.03
 1 -4 -12 62 7
 -1 -4 11 176.02 12.91
 1 -4 -11 162.03 11.89
 -1 -4 11 170.4 12.6
 1 -4 -11 193.44 13.35
 -1 -4 11 140.78 12.09
 1 -4 -11 203.57 13.07
 -1 -4 10 22.39 5.35
 -1 -4 10 23.01 4.72
 -1 -4 10 20.6 4.58
 -1 -4 10 19.31 4.34
 1 -4 -10 25.49 5.54
 1 -4 -10 27.47 5.88
 1 -4 -10 18.88 4.09
 1 -4 -9 156.11 13.18
 1 -4 -9 207.68 14.84
 -1 -4 9 227.85 13.36
 1 -4 -9 181.09 14.23
 -1 -4 9 186.28 13.93
 -1 -4 9 192.8 14.55
 -1 -4 9 178.02 13.57
 1 -4 -8 2.82 4.48
 -1 -4 8 3.32 3.22
 -1 -4 8 8.06 4.5
 1 -4 -8 6.78 4.83
 -1 -4 8 4.16 3.64
 -1 -4 8 4.44 4.72
 1 -4 -8 3.49 3.31
 1 -4 -7 271.82 18.76
 -1 -4 7 257.21 18.11
 1 -4 -7 300.39 19
 1 -4 -7 269.12 17.94
 -1 -4 7 298.62 17.81
 -1 -4 7 245.79 18.14
 1 -4 -7 280.35 18.76
 1 -4 -6 12.07 4.27
 -1 -4 6 13.83 3.03
 1 -4 -6 12.02 4.62
 1 -4 -6 11.14 4.41
 1 -4 -6 10.55 3.16
 -1 -4 6 8.88 3.48
 -1 -4 6 22.97 4.27
 -1 -4 6 11.42 3.22
 1 -4 -5 130.88 10.45
 -1 -4 5 135.58 10.07
 1 -4 -5 154.07 11.1
 1 -4 -5 143.62 10.9
 -1 -4 5 131.73 9.95
 -1 -4 5 156.29 11.65
 -1 -4 5 128.22 10
 1 -4 -5 138.41 9.9
 1 -4 -4 47.58 4.82
 -1 -4 4 39.34 4.61
 1 -4 -4 48.33 5.54
 -1 -4 4 41.56 4.96
 -1 -4 4 56.42 6.21
 1 -4 -4 54.49 5.8
 1 -4 -4 51.4 5.75
 -1 -4 4 49.8 4.83
 -1 -4 4 54.21 5.31
 -1 -4 3 75.07 6.37
 -1 -4 3 83.24 6.79
 1 -4 -3 81.3 6.43
 1 -4 -3 77.56 6.91
 1 -4 -3 90.71 7.35
 -1 -4 3 70.67 6.53
 -1 -4 3 94.7 7.77
 -1 -4 2 232.56 15.02
 -1 -4 2 219.49 14.22
 1 -4 -2 218.93 14.58
 1 -4 -2 216.86 14
 1 -4 -2 211.79 14.61
 1 -4 -1 36.19 4.19
 -1 -4 1 34.31 4.16
 -1 -4 1 37.55 4.71
 1 -4 -1 36.48 4.19
 1 -4 -1 36.51 4.66
 1 -4 -1 40.35 4.02
 -1 -4 1 35.21 4.22
 -1 -4 0 89.93 6.86
 1 -4 0 79.86 6.9
 -1 -4 0 85 7.02
 1 -4 0 83.78 6.57
 1 -4 0 79.41 7.11
 -1 -4 0 83.8 6.96
 1 -4 1 232.44 14.41
 -1 -4 -1 220.05 14.49
 1 -4 1 211.11 14.75
 -1 -4 -1 226.56 14.57
 1 -4 1 228.5 15.06
 -1 -4 -1 228.36 14.99
 -1 -4 -2 281.85 17.03
 -1 -4 -2 256.05 16.5
 1 -4 2 278.33 16.43
 -1 -4 -2 267.17 16.65
 1 -4 2 280.38 17.04
 -1 -4 -2 257.06 17.16
 1 -4 2 216.6 15.87
 1 -4 2 271.59 17.35
 1 -4 3 66.39 5.9
 1 -4 3 76.72 7.17
 -1 -4 -3 67.27 6.05
 1 -4 3 60.24 5.65
 -1 -4 -3 69.87 6.56
 -1 -4 -3 67.99 6.69
 1 -4 3 64.6 6.39
 -1 -4 -3 68.16 6.25
 -1 -4 -4 337.73 21.25
 -1 -4 -4 352.23 22.11
 1 -4 4 305.81 20.98
 -1 -4 -4 357.06 21.69
 1 -4 4 361.33 21.56
 1 -4 4 354.66 20.96
 -1 -4 -4 327.18 21.74
 1 -4 4 310.62 20.94
 1 -4 4 358.87 22.34
 1 -4 5 67.7 7.45
 -1 -4 -5 51.82 6.81
 -1 -4 -5 58.63 6.48
 1 -4 5 52.97 6.04
 -1 -4 -5 63.92 6.22
 -1 -4 -5 62.36 6.74
 1 -4 5 53.41 5.84
 1 -4 5 60.84 5.83
 1 -4 6 67.06 6.93
 1 -4 6 64.91 6.9
 1 -4 6 57.48 8.01
 -1 -4 -6 64.19 7.29
 -1 -4 -6 82.19 7.86
 -1 -4 -6 71.53 7.26
 1 -4 6 82.58 6.73
 1 -4 7 7.13 3.56
 -1 -4 -7 5.23 4.1
 1 -4 7 7.74 3.85
 -1 -4 -7 7.49 4.69
 -1 -4 -7 8.52 4.74
 1 -4 8 17.81 5.38
 1 -4 8 12.17 4.16
 -1 -4 -8 19.36 5.42
 -1 -4 -8 15.68 5.12
 -1 -4 -8 12.34 5.14
 -1 -4 -8 20.13 4.87
 -1 -4 -9 90.98 9.11
 -1 -4 -9 83.75 8.64
 1 -4 9 85.96 8.6
 1 -4 9 98.39 8.2
 1 -4 9 97.98 9.37
 -1 -4 -9 105.43 9.1
 -1 -4 -10 502.83 31.82
 -1 -4 -10 506.17 32.11
 1 -4 10 437 31.42
 1 -4 10 499.81 32.25
 -1 -4 -10 493.02 31.86
 -1 -4 -11 41.91 5.15
 1 -4 11 39.85 5.52
 1 -4 11 36.17 4.89
 -1 -4 -11 42.72 5.85
 -1 -4 -11 37.86 5.16
 -1 -4 -12 154.15 9.58
 -1 -4 -12 133.69 9.54
 1 -4 12 124.74 9.72
 1 -4 12 118.25 9.42
 -1 -4 -13 54.36 4.5
 1 -4 13 53.06 4.4
 1 -3 -15 63.56 5.32
 -1 -3 15 52.63 4.87
 1 -3 -14 5.05 3.57
 -1 -3 14 6.2 2.72
 -1 -3 14 4.41 2.83
 1 -3 -14 4.52 3.34
 1 -3 -14 4.4 2.6
 -1 -3 13 51.14 5.96
 1 -3 -13 54.35 6.59
 -1 -3 13 54.51 5.93
 1 -3 -13 53.79 5.43
 1 -3 -13 55.64 6.45
 -1 -3 13 52.75 5.28
 1 -3 -13 57.73 5.78
 1 -3 -12 248.12 16.32
 1 -3 -12 248.45 16.96
 -1 -3 12 239.37 16.2
 -1 -3 12 196.81 15.45
 1 -3 -12 275.91 17.18
 -1 -3 12 208.54 16.15
 1 -3 -12 275.97 16.36
 -1 -3 12 237.87 16.75
 -1 -3 11 410.58 25.97
 -1 -3 11 385.84 25.3
 -1 -3 11 335.92 24.57
 1 -3 -11 437.85 25.38
 1 -3 -11 412.82 25.84
 -1 -3 11 380.41 25.2
 1 -3 -11 430.42 25.95
 1 -3 -10 178.1 13.5
 -1 -3 10 172.78 13.38
 -1 -3 10 150.06 12.72
 -1 -3 10 177.66 13.32
 1 -3 -10 172.77 13.25
 -1 -3 10 156.52 12.45
 1 -3 -10 193.58 13.23
 1 -3 -10 193.1 13.91
 1 -3 -9 18.62 5.48
 1 -3 -9 30.22 5.37
 1 -3 -9 30.4 5.53
 -1 -3 9 30.43 5.21
 -1 -3 9 30.48 5.45
 -1 -3 9 22.36 4.1
 -1 -3 8 177.21 13.11
 1 -3 -8 186.62 13.97
 -1 -3 8 188.09 13.97
 -1 -3 8 173.8 13.41
 -1 -3 8 202.66 12.74
 -1 -3 8 196.3 13.9
 1 -3 -8 202.39 13.93
 1 -3 -8 188.95 13.64
 -1 -3 7 14.91 3.19
 -1 -3 7 14.83 4.27
 -1 -3 7 24.03 3.55
 1 -3 -7 19.89 4.64
 1 -3 -7 11.73 4.22
 -1 -3 7 15.31 3.61
 -1 -3 7 29.41 4.09
 -1 -3 7 16.95 3.67
 -1 -3 6 82.62 7.02
 -1 -3 6 77.53 6.48
 -1 -3 6 70.51 6.38
 1 -3 -6 83.81 7.46
 -1 -3 6 96.12 6.36
 -1 -3 6 75.95 6.84
 1 -3 -6 80.69 6.81
 1 -3 -6 78.56 7.04
 -1 -3 6 82.63 7.62
 -1 -3 5 75.41 5.3
 -1 -3 5 60.34 5.73
 -1 -3 5 56.13 5.36
 1 -3 -5 68.47 6.29
 1 -3 -5 68.95 5.66
 1 -3 -5 66.56 5.99
 1 -3 -5 68 6.16
 1 -3 -5 75.5 5.72
 -1 -3 5 61.95 5.65
 1 -3 -5 60.36 6.06
 -1 -3 4 41.47 3.52
 -1 -3 4 43.74 4.17
 1 -3 -4 40.6 4.04
 -1 -3 4 41.86 4.94
 1 -3 -4 44.85 3.81
 -1 -3 4 34.75 4
 -1 -3 4 44.74 4.18
 1 -3 -4 41.24 4.7
 -1 -3 4 43.55 3.75
 1 -3 -4 45.61 4.87
 1 -3 -4 40.43 4.49
 -1 -3 4 32.06 3.87
 -1 -3 3 600.52 34.16
 -1 -3 3 542.24 33.48
 -1 -3 3 506.93 33.31
 -1 -3 3 603.11 33.09
 1 -3 -3 561.14 33.76
 -1 -3 3 559.78 33.29
 1 -3 -3 594.73 33.68
 1 -3 -3 647.36 34
 1 -3 -3 532.89 33.25
 1 -3 -3 623.09 34.13
 1 -3 -2 418.69 26.73
 1 -3 -2 495.09 26.95
 -1 -3 2 412.66 26.38
 -1 -3 2 469.39 27.14
 1 -3 -2 478.53 26.83
 1 -3 -1 68.67 5.55
 -1 -3 1 68.4 5.7
 -1 -3 0 635.48 38.23
 1 -3 0 679.85 38.31
 1 -3 1 61.31 5.45
 -1 -3 -1 72.11 5.88
 1 -3 1 64.81 5.22
 1 -3 1 71.63 5.79
 -1 -3 -1 61.5 5.49
 1 -3 1 75.55 5.74
 -1 -3 -2 379.44 21.85
 1 -3 2 360.48 21.37
 1 -3 2 333.67 21.24
 -1 -3 -2 366.64 21.55
 1 -3 2 348.67 21.99
 -1 -3 -2 361.48 21.89
 1 -3 2 349.1 21.55
 -1 -3 -2 349.49 21.35
 -1 -3 -2 380.78 22.29
 1 -3 2 359.1 21.93
 1 -3 3 33.35 3.48
 1 -3 3 22.72 3.61
 1 -3 3 31.02 3.36
 -1 -3 -3 34.76 4.04
 1 -3 3 25.7 3.88
 1 -3 3 27.59 3.06
 -1 -3 -3 30.44 4.19
 1 -3 3 28.24 4.03
 -1 -3 -3 30.94 3.64
 -1 -3 -3 32.1 3.94
 1 -3 4 24.64 3.48
 1 -3 4 32.86 4.36
 1 -3 4 31.17 3.93
 -1 -3 -4 26.49 4.39
 1 -3 4 29.97 3.63
 -1 -3 -4 32.63 4.08
 1 -3 4 18.88 3.65
 1 -3 4 30.07 4.5
 1 -3 4 31.37 3.3
 -1 -3 -4 27.05 3.45
 -1 -3 -4 26.87 3.98
 -1 -3 -5 89.49 7.41
 -1 -3 -5 88.7 7.6
 -1 -3 -5 81.88 6.89
 1 -3 5 93.07 7.05
 1 -3 5 77.49 6.78
 1 -3 5 85.98 7.1
 1 -3 5 93.09 6.88
 -1 -3 -6 134.44 9.75
 1 -3 6 129.22 9.72
 -1 -3 -6 127.41 10.11
 1 -3 6 122.58 9.52
 1 -3 6 133.17 9.2
 1 -3 6 129.14 10.34
 -1 -3 -6 135.55 10.04
 -1 -3 -6 109.09 9.66
 -1 -3 -7 217.32 16.21
 1 -3 7 237.55 16.22
 -1 -3 -7 233.81 16.33
 1 -3 7 231.46 16.23
 1 -3 7 236.63 15.33
 -1 -3 -7 245.33 16.41
 1 -3 7 268.93 15.71
 1 -3 7 247.69 16.87
 -1 -3 -8 72.11 7.79
 -1 -3 -8 67.41 7.43
 -1 -3 -8 69.2 7.22
 -1 -3 -8 82.89 7.8
 1 -3 8 78.71 7.4
 1 -3 8 95.84 7.07
 1 -3 8 55.02 7.12
 1 -3 8 69.93 6.74
 1 -3 8 57.97 6.78
 1 -3 9 219.74 17.15
 -1 -3 -9 265.99 17.72
 1 -3 9 250.21 17.81
 1 -3 9 299.9 16.6
 -1 -3 -9 234.6 17.15
 -1 -3 -9 255.92 18.08
 1 -3 9 234.46 17.38
 -1 -3 -10 76.08 7.81
 -1 -3 -10 58.62 6.85
 1 -3 10 68.88 7.78
 1 -3 10 80.71 6.73
 -1 -3 -10 69.97 7.94
 1 -3 10 59.76 7.09
 -1 -3 -11 120.19 10.33
 -1 -3 -11 120.82 10.18
 -1 -3 -11 111.59 10.42
 1 -3 11 119.17 9.93
 1 -3 11 105.16 9.55
 -1 -3 -11 118.46 9.39
 -1 -3 -12 24.97 4.92
 1 -3 12 18.64 3.86
 -1 -3 -12 26.85 5.25
 -1 -3 -12 23.45 3.77
 -1 -3 -12 23.43 3.57
 1 -3 12 21.2 4.64
 -1 -3 -12 18.46 4.61
 1 -3 12 22.69 4.42
 1 -3 13 13.83 2.91
 -1 -3 -13 7.44 3.39
 1 -3 13 15.63 3.76
 1 -3 13 8.32 2.79
 -1 -3 -13 10.35 3.89
 1 -3 14 34.34 3.67
 1 -3 14 35.79 4
 -1 -3 -14 44.23 4.54
 1 -2 -16 11.19 2.97
 1 -2 -16 6.55 2.16
 -1 -2 16 12.21 2.7
 -1 -2 15 8.34 2.35
 1 -2 -15 11.82 4.15
 -1 -2 15 11.04 2.56
 -1 -2 15 14.44 3.62
 1 -2 -15 12.95 3.16
 1 -2 -14 79.78 7.72
 -1 -2 14 91.53 7.55
 -1 -2 14 74.11 7.18
 1 -2 -14 103.24 8.11
 -1 -2 14 102.13 8.51
 1 -2 -14 92.44 8.64
 -1 -2 13 196.49 14.07
 1 -2 -13 204.45 13.71
 -1 -2 13 165.3 12.87
 -1 -2 13 172.32 13.05
 1 -2 -13 190.34 14.1
 1 -2 -13 175.75 13.49
 -1 -2 12 60.8 6.64
 1 -2 -12 61.26 7.33
 -1 -2 12 72.51 7.62
 -1 -2 12 64.44 6.99
 1 -2 -12 61.96 6.25
 1 -2 -12 70.56 7.02
 1 -2 -12 69.02 8.04
 1 -2 -12 66.38 7.39
 -1 -2 11 733.39 41.92
 -1 -2 11 662.37 40.97
 -1 -2 11 654.04 40.61
 1 -2 -11 689.01 40.72
 1 -2 -11 701.27 41.53
 -1 -2 11 643.51 40.96
 1 -2 -11 661.51 41.28
 1 -2 -11 707.23 41.51
 1 -2 -11 689.16 41.23
 -1 -2 10 274.88 19.42
 -1 -2 10 277.43 19.59
 -1 -2 10 358.19 19
 1 -2 -10 290.31 20.04
 1 -2 -10 329.42 20.38
 -1 -2 10 304.75 20.24
 1 -2 -10 296.11 19.91
 -1 -2 10 290.86 19.62
 1 -2 -10 286.56 19.37
 1 -2 -10 292.89 20.1
 -1 -2 9 242.58 16.06
 1 -2 -9 222.34 15.75
 -1 -2 9 208.07 15.37
 1 -2 -9 219.45 15.34
 -1 -2 9 277.85 15.01
 -1 -2 9 214.17 15.42
 1 -2 -9 221.33 15.95
 1 -2 -9 230.53 15.76
 -1 -2 9 230.31 15.62
 1 -2 -8 100.51 8.64
 1 -2 -8 118.99 9.22
 -1 -2 8 108.73 8.65
 1 -2 -8 103.22 8.51
 -1 -2 8 114.03 8.64
 1 -2 -8 116.7 8.89
 -1 -2 8 104.49 8.53
 -1 -2 8 119.24 9.05
 1 -2 -7 22.8 3.68
 1 -2 -7 26.62 3.43
 -1 -2 7 23.64 3.71
 1 -2 -7 17.24 3.97
 1 -2 -7 19.79 3.61
 -1 -2 7 23.54 3.88
 -1 -2 7 21.3 3.22
 -1 -2 7 18.09 4.11
 1 -2 -7 22.99 3.86
 -1 -2 7 19.28 3.48
 1 -2 -6 60.66 5.55
 1 -2 -6 70.88 5.79
 1 -2 -6 68.95 5.77
 1 -2 -6 59.87 4.25
 1 -2 -6 69.53 5.75
 1 -2 -6 72.33 5.75
 1 -2 -6 70.13 5.93
 1 -2 -6 50.46 3.91
 -1 -2 6 66.62 5.75
 1 -2 -6 65.48 4.8
 1 -2 -6 68.3 4.28
 -1 -2 6 68.56 5.67
 -1 -2 6 63.58 5.04
 -1 -2 6 72.36 7.03
 -1 -2 6 65.05 5.37
 1 -2 -6 67.75 4.11
 -1 -2 6 86.28 5.3
 -1 -2 5 771.08 42.64
 -1 -2 5 697.06 41.87
 -1 -2 5 821.04 42.92
 1 -2 -5 773.96 42.77
 1 -2 -5 663.61 41.38
 -1 -2 5 739.07 42.49
 1 -2 -5 842.62 42.99
 1 -2 -5 780.68 42.56
 -1 -2 5 763.77 44.21
 1 -2 -4 623.43 35.35
 -1 -2 4 576.65 36.47
 1 -2 -3 1174.72 64.4
 1 -2 -3 1120.11 63.68
 -1 -2 3 1120.53 65.6
 1 -2 -2 60.03 4.13
 1 -2 -2 60.78 4.23
 -1 -2 2 60.18 4.08
 1 -2 -1 1220.96 69.13
 1 -2 0 836.94 47.93
 -1 -2 -1 1622.79 90.86
 1 -2 1 1572.49 91.87
 1 -2 1 1716.12 91.36
 1 -2 1 1516.18 91.69
 1 -2 2 305.95 18.59
 -1 -2 -2 312.31 17.93
 1 -2 2 334.26 19.61
 1 -2 2 301.1 19.23
 -1 -2 -3 60.88 3.84
 1 -2 3 57.81 5.64
 1 -2 3 67.23 5.57
 -1 -2 -3 56.12 4.62
 1 -2 3 55.31 4.55
 -1 -2 -3 54.63 3.47
 -1 -2 -4 578 33.23
 1 -2 4 531.85 32.97
 -1 -2 -4 620.56 33.63
 -1 -2 -4 545.39 33.11
 -1 -2 -4 579.44 33.35
 -1 -2 -4 604.02 32.33
 1 -2 4 681.64 35.14
 1 -2 4 608.56 34.53
 -1 -2 -4 592.2 33.67
 1 -2 4 598.87 33
 1 -2 4 605.35 33.41
 1 -2 4 440.03 32.41
 1 -2 4 562.46 33.27
 -1 -2 -5 45.1 4.85
 -1 -2 -5 41.13 4.26
 -1 -2 -5 42.45 4.6
 1 -2 5 41.84 5.23
 -1 -2 -5 39.34 4.23
 1 -2 5 41.51 4.49
 -1 -2 -5 44.41 3.42
 1 -2 5 36.15 3.87
 1 -2 5 41.4 3.95
 1 -2 5 45.68 4.22
 1 -2 5 46.95 5.48
 1 -2 6 489.17 28.31
 -1 -2 -6 504.22 28.82
 -1 -2 -6 493.32 28.42
 1 -2 6 440.67 27.85
 -1 -2 -6 503.5 28.64
 1 -2 6 489.7 27.51
 -1 -2 -6 433.4 27.83
 1 -2 6 472.13 29.94
 1 -2 6 422.54 27.12
 -1 -2 -7 8.57 3.28
 1 -2 7 5.15 2.93
 1 -2 7 4.02 2.2
 1 -2 7 13.57 3.15
 -1 -2 -7 3.91 2.71
 -1 -2 -7 10.27 3.59
 1 -2 7 8.88 3.15
 1 -2 8 23.07 4.24
 -1 -2 -8 16.69 4.34
 1 -2 8 20.12 3.42
 1 -2 8 27.45 4.14
 -1 -2 -8 22.16 3.9
 -1 -2 -8 18.14 4.4
 1 -2 8 23.4 4.16
 -1 -2 -8 18.31 4.72
 1 -2 9 87.15 6.92
 -1 -2 -9 77.3 7.68
 1 -2 9 86.23 7.68
 1 -2 9 75.71 7.58
 1 -2 9 81.75 7.1
 -1 -2 -9 83.73 8.34
 -1 -2 -9 85.46 8.18
 -1 -2 -9 72.46 6.98
 1 -2 9 81.53 7.7
 1 -2 10 10.24 4
 1 -2 10 12.88 3.45
 1 -2 10 10.34 4.16
 1 -2 10 11.02 3.76
 -1 -2 -10 14.2 4.67
 -1 -2 -10 4.08 4.74
 -1 -2 -10 12.02 4.29
 -1 -2 -10 15.68 3.76
 1 -2 10 10.9 4.29
 1 -2 11 41.08 5.72
 -1 -2 -11 43.61 6.28
 1 -2 11 36.36 5.05
 -1 -2 -11 37.93 5.34
 1 -2 11 30.24 5.49
 -1 -2 -11 33.56 4.54
 -1 -2 -11 40.09 5.71
 1 -2 11 29.96 4.44
 -1 -2 -12 88.47 8.58
 -1 -2 -12 107.18 8.93
 1 -2 12 95.73 8.4
 1 -2 12 70.79 6.93
 1 -2 12 85.15 7.96
 -1 -2 -12 75.51 6.48
 -1 -2 -12 80.09 7.81
 1 -2 12 78.99 7.16
 -1 -2 -13 7.53 4.49
 -1 -2 -13 2.23 3.12
 1 -2 13 1.74 3.24
 1 -2 13 3.12 2.35
 1 -2 13 3.86 3.51
 -1 -2 -13 7.38 4.14
 -1 -2 -14 5.93 3.5
 1 -2 14 3.04 3.02
 -1 -2 -14 5.85 3.72
 1 -2 14 4.88 2.69
 1 -2 15 20.06 2.71
 1 -2 15 24.22 3.34
 -1 -2 -15 16.43 2.57
 -1 -2 -15 27.33 3.36
 -1 -2 -15 25.4 3.63
 1 -1 -16 12.67 3.44
 -1 -1 16 13.57 2.89
 -1 -1 15 102.05 8.83
 1 -1 -15 119.9 8.58
 -1 -1 15 126.46 9.42
 1 -1 -15 132.5 10.08
 1 -1 -14 17.18 5.62
 1 -1 -14 20.12 3.95
 -1 -1 14 18.4 3.33
 -1 -1 14 15.45 4.09
 -1 -1 13 107.13 8.78
 -1 -1 13 102.67 9.42
 1 -1 -13 125.37 9.54
 1 -1 -13 111.18 10.51
 1 -1 -12 73.69 7.01
 -1 -1 12 44.5 5.68
 -1 -1 12 57.97 5.95
 -1 -1 12 52.98 6.22
 1 -1 -12 59.13 7.94
 -1 -1 11 94.49 8.16
 1 -1 -11 97.51 7.37
 1 -1 -11 92.63 9.46
 -1 -1 11 90.7 7.86
 1 -1 -11 100.92 8.75
 -1 -1 11 75.49 7.54
 1 -1 -11 98.68 7.83
 1 -1 -10 29.79 3.84
 -1 -1 10 22.07 3.87
 -1 -1 10 22.61 4.08
 1 -1 -10 21.85 4.66
 -1 -1 10 27.82 4
 1 -1 -10 34.01 5.89
 1 -1 -10 26.42 4.02
 -1 -1 9 243.56 14.97
 1 -1 -9 243.76 15.72
 -1 -1 9 202.71 14.69
 1 -1 -9 230.08 14.49
 -1 -1 9 221.94 14.82
 1 -1 -9 221.39 14.82
 1 -1 -9 233.03 15.3
 -1 -1 9 221.65 14.02
 1 -1 -8 204.63 13.9
 -1 -1 8 198.73 13.98
 -1 -1 8 207.22 12.69
 -1 -1 8 196.62 13.15
 1 -1 -8 198.73 13.89
 1 -1 -8 198.4 13.87
 1 -1 -8 206.28 14.16
 1 -1 -8 201.4 13.23
 -1 -1 8 196.26 15.15
 1 -1 -8 194.73 13.05
 -1 -1 8 245.06 12.88
 -1 -1 8 189.64 13.27
 1 -1 -8 210.53 13.68
 -1 -1 8 192.54 13.24
 -1 -1 8 200.45 13.31
 1 -1 -8 214.27 13.56
 1 -1 -7 1173.96 64.2
 -1 -1 7 1068.79 63.23
 -1 -1 7 1165.01 65.35
 1 -1 -7 1013.27 63.01
 1 -1 -7 1138.85 63.66
 1 -1 -7 1152.62 63.95
 -1 -1 7 1221.32 62.72
 -1 -1 7 1021.8 63.14
 1 -1 -7 1075.22 63.38
 -1 -1 7 1039 63.22
 1 -1 -7 1086 63.36
 -1 -1 7 1125.07 64.01
 1 -1 -7 1148.25 63.89
 1 -1 -6 73.91 5.88
 -1 -1 6 72.45 5.88
 -1 -1 6 68.8 6.62
 1 -1 -6 68.09 5.59
 1 -1 -5 113.3 8.1
 -1 -1 5 124.48 8.22
 1 -1 -5 117.96 7.96
 1 -1 -4 5229.6 287.81
 -1 -1 4 5472.62 288.46
 1 -1 -4 4705.17 287.96
 1 -1 -4 5299.21 288.28
 -1 -1 3 923.48 58.62
 1 -1 -3 1044.65 57.68
 -1 -1 3 1106.87 58.27
 1 -1 -3 995.02 57.51
 1 -1 -3 1036.92 57.63
 1 -1 -3 999.06 57.33
 1 -1 -3 1087.31 57.88
 1 -1 -3 1065.08 58.12
 -1 -1 2 447.64 23.69
 1 -1 -2 412.59 23.04
 -1 -1 2 451.42 24.38
 1 -1 -2 372.6 23.26
 1 -1 -1 4374.37 248.37
 -1 -1 1 4543.55 248.52
 -1 -1 0 3205.89 172.29
 1 -1 0 2977.02 172.56
 1 -1 0 3016.21 172.51
 1 -1 0 2977.27 172.77
 -1 -1 0 3090.33 172.46
 1 -1 1 410.84 22.96
 1 -1 1 429.1 23.14
 -1 -1 -1 428.53 23.02
 1 -1 1 428.72 23.42
 1 -1 1 380.43 22.4
 1 -1 1 394.79 23.34
 -1 -1 -2 330.6 19.52
 -1 -1 -2 345.88 19.96
 1 -1 2 336.25 20.44
 -1 -1 -2 337.51 19.62
 -1 -1 -2 356.8 19.4
 1 -1 2 329.76 19.45
 1 -1 2 339.19 20.26
 -1 -1 -3 2150.85 130.72
 -1 -1 -3 2269.59 130.69
 -1 -1 -3 2433.21 131.29
 1 -1 3 2618.18 131.88
 -1 -1 -3 2403.27 131.01
 -1 -1 -3 2382.59 130.87
 1 -1 3 2316.14 130.83
 -1 -1 -4 3.41 1.72
 -1 -1 -4 3.8 1.46
 -1 -1 -4 3.8 1.68
 -1 -1 -4 2.8 1.49
 -1 -1 -4 4.46 1.27
 1 -1 4 3.81 1.43
 1 -1 4 2.95 2.45
 1 -1 5 446.01 26.65
 -1 -1 -5 414.66 25.19
 -1 -1 -5 403.73 25.5
 -1 -1 -5 444.86 24.97
 -1 -1 -5 421.33 25.36
 1 -1 5 409.14 25.14
 1 -1 5 443.84 26.41
 -1 -1 -5 429.5 25.11
 -1 -1 -6 484.89 28.72
 1 -1 6 484.38 28.28
 -1 -1 -6 498.87 28.65
 -1 -1 -6 469.84 28.49
 1 -1 6 457.11 29.66
 1 -1 6 499.28 28.6
 1 -1 6 472.82 27.55
 -1 -1 -6 470.39 28.37
 -1 -1 -6 488.47 28.15
 1 -1 6 541.69 30.34
 -1 -1 -6 423.24 28.3
 -1 -1 -7 216.01 12.83
 -1 -1 -7 199.2 13.01
 1 -1 7 186.71 12.51
 -1 -1 -7 176.84 12.45
 1 -1 7 202.65 13.27
 -1 -1 -7 184.08 13.15
 -1 -1 -7 206.26 13.3
 1 -1 7 210.61 13.03
 1 -1 7 195.15 12.84
 1 -1 7 193.43 12.56
 -1 -1 -7 204.27 13.47
 1 -1 7 224.71 12.24
 -1 -1 -7 194.93 13.25
 -1 -1 -7 195.12 13.1
 1 -1 7 175.27 12.26
 -1 -1 -7 199.25 13.1
 1 -1 8 46.73 4.41
 -1 -1 -8 57.82 6.08
 1 -1 8 52.48 5.15
 1 -1 8 50.39 4.72
 -1 -1 -8 55.56 5.72
 -1 -1 -8 45.85 4.59
 1 -1 8 47.8 4.59
 1 -1 8 58.05 5.4
 1 -1 8 55.23 5.17
 -1 -1 -8 50.13 5.22
 -1 -1 -8 54 5.89
 1 -1 8 59.46 4.63
 1 -1 9 164.38 11.87
 -1 -1 -9 168.69 11.68
 1 -1 9 184.1 12.25
 1 -1 9 167.12 11.98
 -1 -1 -9 183.08 13.23
 -1 -1 -9 182.82 12.72
 -1 -1 -9 210.17 13.34
 1 -1 9 180.36 12.5
 -1 -1 -10 365.07 21.68
 -1 -1 -10 349.82 22.06
 1 -1 10 329.88 20.92
 1 -1 10 346.32 21.51
 1 -1 10 294.11 20.7
 -1 -1 -10 370.08 22.22
 1 -1 10 309.44 20.91
 -1 -1 -11 262.49 16.93
 -1 -1 -11 267.09 17.81
 -1 -1 -11 276.6 17.78
 1 -1 11 244.63 16.71
 1 -1 11 261.77 17.06
 1 -1 11 210.34 16.07
 1 -1 12 59.83 6.15
 -1 -1 -12 74.62 7.89
 -1 -1 -12 86.18 8.29
 1 -1 12 68.35 7.12
 -1 -1 -12 80.31 6.95
 1 -1 12 78.22 7.13
 1 -1 13 3.88 3.19
 1 -1 13 5.43 4.08
 -1 -1 -13 12.57 4.26
 1 -1 13 9.02 3.38
 -1 -1 -13 13.12 4.84
 1 -1 14 27.62 4.1
 -1 -1 -14 28.12 4.8
 1 -1 14 27.94 3.81
 -1 -1 -14 30.13 4.57
 1 -1 14 27.96 5.03
 -1 -1 -15 19.12 3.3
 -1 -1 -15 25.63 4.44
 -1 -1 -15 16.22 3.02
 1 -1 15 22.37 3.8
 1 -1 15 12.53 2.78
 -1 -1 -16 43.94 4.42
 1 -1 16 47.93 4.4
 -1 0 17 147.74 8.99
 -1 0 17 130.61 8.78
 1 0 -17 146.69 8.99
 -1 0 16 12.41 3.42
 1 0 -16 19.69 4.29
 1 0 -16 22.17 4.48
 -1 0 16 11.28 3.23
 -1 0 15 173.16 13.39
 1 0 -15 208.67 15.18
 -1 0 15 222.84 14.67
 -1 0 15 204.21 14.21
 -1 0 14 404.77 26.82
 -1 0 14 469.22 27.47
 1 0 -14 457.37 28.49
 -1 0 14 372.33 25.55
 -1 0 13 207.7 14.16
 1 0 -13 173.2 12.63
 -1 0 13 174.95 12.42
 1 0 -13 194.3 13.03
 -1 0 13 182.9 13.69
 -1 0 12 91.97 7.15
 1 0 -12 105.53 10.41
 -1 0 12 91.9 8.12
 -1 0 12 88.25 7.19
 -1 0 12 85.02 8.25
 1 0 -12 92.76 7.92
 1 0 -12 90.51 7.75
 1 0 -12 88.81 7.55
 1 0 -11 272.19 18.15
 1 0 -11 240.09 15.83
 -1 0 11 233 16
 -1 0 11 244.35 16.52
 1 0 -11 262.79 16.48
 -1 0 11 226.5 15.69
 -1 0 11 251.3 16.54
 -1 0 11 241.65 15.43
 -1 0 11 259.95 15.72
 1 0 -11 240.41 15.93
 -1 0 10 122.64 9.52
 1 0 -10 133.08 11.08
 -1 0 10 111.15 8.92
 1 0 -10 150.12 11.06
 -1 0 10 114.41 9.28
 -1 0 10 125.94 8.62
 1 0 -10 125.66 9.58
 1 0 -10 132.92 9.4
 -1 0 10 113.11 8.81
 -1 0 10 132.23 8.8
 1 0 -10 132.17 9.27
 -1 0 9 153.41 10.5
 1 0 -9 165.87 11.45
 1 0 -9 151.34 10.4
 1 0 -9 137.42 10.46
 1 0 -9 130.11 11.34
 -1 0 9 148.99 10.12
 1 0 -9 158.16 12.11
 -1 0 9 147.22 10.43
 -1 0 9 143.11 10.12
 1 0 -9 147.87 10.23
 1 0 -8 15.05 2.8
 -1 0 8 15.89 2.69
 1 0 -8 17.19 3.49
 -1 0 8 18.98 2.64
 1 0 -8 16.81 4.17
 1 0 -8 18.18 3.34
 1 0 -8 18.49 2.75
 -1 0 8 19.27 3.64
 -1 0 8 17.72 2.79
 -1 0 8 16.01 2.55
 -1 0 8 17.8 3.11
 1 0 -8 18.22 4.17
 1 0 -8 27.74 5.2
 1 0 -8 20.55 3.27
 -1 0 7 26.02 2.71
 -1 0 7 26.59 2.93
 1 0 -7 16.64 3.65
 1 0 -7 22.94 4.36
 1 0 -7 21.23 3.82
 1 0 -7 18.4 3.5
 -1 0 7 24 3.69
 1 0 -7 25.61 3.87
 -1 0 7 24.34 2.75
 1 0 -7 25.25 3.46
 1 0 -7 23.8 3.11
 -1 0 7 24.36 3.34
 1 0 -7 21.88 2.86
 -1 0 6 29.83 3.96
 1 0 -6 25.02 2.92
 1 0 -6 25.72 3.22
 1 0 -6 27.21 3.42
 -1 0 6 28.93 3.37
 1 0 -6 30.45 3.83
 -1 0 5 903.57 50.6
 1 0 -5 886.54 50.66
 1 0 -5 878.2 50.97
 -1 0 5 920.9 50.73
 1 0 -5 804.64 50.24
 1 0 -5 875.28 50.58
 -1 0 5 930.8 51.05
 -1 0 4 1.17 1.72
 1 0 -4 0.94 1.77
 1 0 -4 1.92 1.87
 1 0 -4 1.69 2.31
 -1 0 4 1.6 1.72
 1 0 -4 1.52 1.34
 -1 0 4 0.51 1.82
 -1 0 3 684.73 39.37
 1 0 -3 689.39 39.64
 -1 0 3 765.19 39.62
 1 0 -3 698.72 39.42
 -1 0 3 633.26 39.34
 -1 0 2 3037.48 161.54
 1 0 -2 2742.51 161.46
 1 0 -2 2739.99 161.36
 1 0 -2 3079.14 161.53
 1 0 -1 2683.69 142.81
 -1 0 1 2615.74 142.8
 1 0 -1 2416.23 142.69
 -1 0 0 80.94 5.35
 -1 0 0 96.96 5.28
 1 0 1 4.59 0.94
 -1 0 -1 3.41 1.37
 1 0 1 4.22 1.34
 -1 0 -1 3.9 0.96
 -1 0 -2 44.09 3.32
 -1 0 -2 45.08 3.71
 1 0 2 46.19 3.36
 -1 0 -2 41.89 3.6
 1 0 3 2864.9 164.19
 -1 0 -3 2959.8 163.75
 -1 0 -3 2956.43 164.07
 1 0 3 2976.67 163.88
 -1 0 -3 2789.11 163.81
 -1 0 -3 2986.14 163.84
 -1 0 -3 2884.33 164.08
 -1 0 -4 673.86 38.11
 -1 0 -4 655.04 38.17
 1 0 4 691.57 38.26
 -1 0 -4 660.58 38.54
 -1 0 -4 618.58 38.18
 1 0 4 694.61 38.71
 -1 0 -4 642.8 38.45
 -1 0 -5 314.63 18.96
 1 0 5 312.02 18.56
 -1 0 -5 287.51 18.44
 -1 0 -5 282.99 18.4
 -1 0 -5 309.22 18.33
 1 0 5 322.76 19.12
 -1 0 -5 287.16 18.89
 1 0 6 153.49 9.97
 -1 0 -6 137.11 9.59
 1 0 6 130.87 8.9
 -1 0 -6 143.24 9.75
 -1 0 -6 141.5 9.46
 1 0 6 133.01 8.9
 1 0 6 157.35 10.62
 -1 0 -6 130.76 9.69
 -1 0 -6 139.55 10.2
 1 0 6 145.39 9.18
 -1 0 -6 130.6 10.15
 -1 0 -7 308.45 19.54
 -1 0 -7 321.5 20.51
 1 0 7 333.47 18.89
 1 0 7 329.72 20.12
 -1 0 -7 234.77 19.26
 1 0 7 337.15 19.2
 1 0 7 374.39 21.35
 -1 0 -7 282.48 19.51
 -1 0 -7 279.38 19.45
 -1 0 -7 304.06 19.34
 -1 0 -7 327.93 20
 -1 0 -7 306.98 19.24
 -1 0 -7 321.71 20.09
 1 0 7 333.75 19.26
 1 0 7 337.68 19.1
 1 0 7 296.77 18.88
 -1 0 -7 345.74 19.83
 -1 0 -8 27.7 4.71
 -1 0 -8 22.05 4.52
 -1 0 -8 21.67 3.83
 1 0 8 25.67 3.55
 -1 0 -8 28.45 4.19
 1 0 8 31.02 3.58
 -1 0 -8 34.55 3.95
 -1 0 -8 25.55 5.48
 1 0 8 27.61 3.26
 -1 0 -8 27.9 5.01
 1 0 8 26.97 3.11
 -1 0 -9 947.14 47.3
 1 0 9 770.67 45.85
 -1 0 -9 759.56 45.8
 -1 0 -9 663.39 46.05
 1 0 9 782.53 45.85
 -1 0 -9 733.23 46.57
 1 0 9 847.04 46
 1 0 9 807.87 45.58
 1 0 10 8.45 2.94
 1 0 10 6.19 2.54
 -1 0 -10 9.63 5.23
 1 0 10 6.6 2.7
 -1 0 -10 14.23 5.63
 1 0 10 10.65 2.95
 1 0 11 8.87 2.98
 1 0 11 7.38 2.69
 1 0 11 8.45 2.96
 -1 0 -11 9.45 4.28
 1 0 11 8.39 3.33
 -1 0 -11 19.75 6.04
 1 0 11 9.05 2.24
 1 0 12 83.32 7.61
 -1 0 -12 108.52 10.4
 1 0 12 92.91 7.76
 1 0 12 91.82 8.08
 1 0 12 108.04 8.7
 -1 0 -12 103.05 8.82
 1 0 12 96.09 7.11
 1 0 13 37.09 5.27
 1 0 13 31.22 3.95
 -1 0 -13 28.37 4.78
 -1 0 -13 42.39 7.05
 1 0 13 26.64 4.13
 -1 0 -14 10.11 3.01
 1 0 14 0.53 3.02
 -1 0 -14 4.46 4.83
 1 0 14 7.81 2.72
 1 0 15 33.47 4.37
 -1 0 -15 31.06 5.21
 -1 0 -16 8.94 2.59
 1 0 16 3.57 1.9
 -1 1 17 23.01 2.8
 1 1 -17 24.2 2.78
 1 1 -17 19.69 3.05
 -1 1 16 11.41 2.9
 -1 1 16 8.73 2.81
 -1 1 16 15.59 3.34
 1 1 -16 16.37 4.63
 -1 1 15 116.81 8.53
 -1 1 15 124.25 9.84
 -1 1 15 121.78 9.67
 1 1 -15 122.69 8.68
 1 1 -15 127.2 11.19
 -1 1 14 23.88 3.51
 1 1 -14 20.55 4.27
 -1 1 14 23.67 3.25
 -1 1 14 24.8 4.59
 1 1 -14 22.42 4.53
 1 1 -14 23.73 7.24
 1 1 -13 127.14 10.07
 1 1 -13 142.8 12.93
 -1 1 13 124.24 9.14
 -1 1 13 131 9.41
 -1 1 13 126.16 10.4
 1 1 -13 108.57 9.62
 -1 1 13 124.02 9.9
 -1 1 12 70.87 7.12
 -1 1 12 65.34 5.96
 1 1 -12 77.17 9.61
 -1 1 12 68.52 6.1
 1 1 -12 65.24 7.31
 1 1 -12 62.23 7
 -1 1 12 57.94 6.35
 1 1 -11 117.69 9.41
 1 1 -11 103.08 10.94
 -1 1 11 109.62 9.07
 -1 1 11 99.69 8.48
 1 1 -10 28.42 6.42
 -1 1 10 27.1 3.86
 -1 1 10 33.15 4.47
 -1 1 9 250.39 14.65
 -1 1 9 219.17 14.05
 -1 1 8 227.64 13.51
 1 1 -8 192.91 13.95
 -1 1 8 221.54 14.7
 1 1 -8 206.13 15.53
 1 1 -8 200.33 13.96
 1 1 -8 201.45 14.14
 1 1 -8 226.77 14.51
 -1 1 8 198.32 13.07
 1 1 -7 1084.96 66.2
 1 1 -7 1074.12 67.81
 1 1 -7 1306.74 66.58
 -1 1 7 1196.93 67.2
 1 1 -7 1034.82 66.58
 -1 1 7 1064.23 65.57
 -1 1 7 1180.05 67.09
 1 1 -7 1153.17 66.57
 -1 1 7 1264.65 66.07
 -1 1 7 1213.96 67.07
 1 1 -7 1321.28 66.83
 -1 1 7 1007.76 65.49
 1 1 -7 1404.63 67
 -1 1 6 77.33 6.01
 1 1 -6 68.13 6.58
 1 1 -6 71.3 6.69
 1 1 -6 66.05 6.09
 -1 1 6 70.33 5.94
 1 1 -6 59.03 5.65
 1 1 -6 65.91 5.69
 1 1 -5 115.19 8.38
 1 1 -5 113.86 7.8
 -1 1 5 119.77 8.42
 -1 1 5 120.76 8.19
 1 1 -5 108.15 8.04
 1 1 -5 107.92 8.93
 -1 1 4 5481.32 288.61
 -1 1 4 4974.94 288.69
 1 1 -4 5180.72 288.58
 1 1 -4 4941.14 288.24
 -1 1 4 5275.2 288.1
 1 1 -4 5010.42 288.65
 -1 1 3 1051.18 58.31
 1 1 -3 1004.6 58.72
 1 1 -3 1049.89 58.76
 -1 1 3 1093.52 58.7
 1 1 -3 971.73 58.5
 1 1 -2 414.43 23.39
 1 1 -2 412.84 23.49
 -1 1 2 403.66 22.94
 -1 1 2 409.43 23.12
 -1 1 2 437.36 23.44
 1 1 -2 386.35 23.35
 1 1 -2 328.86 23.83
 1 1 -2 422.58 23.5
 1 1 -2 435.47 24.07
 1 1 -1 4564.98 245.62
 1 1 -1 4599.53 246.22
 1 1 -1 4301.2 245.43
 1 1 -1 4309.05 245.69
 -1 1 1 4233.11 245.56
 -1 1 1 4263.73 245.5
 -1 1 1 4579.56 245.37
 -1 1 1 4355.39 245.4
 -1 1 0 2905.83 164.76
 1 1 0 2975.5 164.71
 -1 1 -1 388.09 23.26
 1 1 1 403.04 22.58
 -1 1 -1 385.91 22.36
 1 1 1 415.59 22.61
 1 1 1 395.49 22.78
 1 1 1 407.02 22.74
 1 1 1 412.28 22.94
 -1 1 -2 322.51 17.96
 -1 1 -2 249.34 18.71
 1 1 2 351.83 18.56
 -1 1 -2 271.71 18.3
 1 1 2 352.33 18.3
 1 1 3 2487.95 131.32
 1 1 3 2477.48 131.43
 -1 1 -3 2176.34 131.53
 1 1 3 2425.35 131.65
 -1 1 -3 2163.52 131.57
 -1 1 -3 2191.65 131.13
 1 1 3 2478.97 131.57
 -1 1 -4 3.39 1.74
 -1 1 -4 4.2 2.13
 -1 1 -4 2.7 1.43
 1 1 4 2.81 1.88
 -1 1 -4 1.64 2.25
 1 1 4 1.88 1.84
 1 1 4 4.1 1.73
 -1 1 -4 2.88 1.94
 -1 1 -5 427.75 24.5
 1 1 5 437.92 23.91
 -1 1 -5 352.74 23.66
 -1 1 -5 406.61 24.87
 -1 1 -5 351.66 23.85
 -1 1 -5 403.22 23.55
 1 1 5 412.55 23.8
 1 1 6 553.34 29.73
 1 1 6 497.92 29.67
 -1 1 -6 461.23 30.01
 -1 1 -6 503.25 31.52
 1 1 6 531.06 29.66
 -1 1 -6 557.96 30.24
 -1 1 -6 480.94 31.08
 1 1 6 491.1 29.52
 -1 1 -6 491.14 29.86
 1 1 7 210.86 12.82
 1 1 7 205.19 12.98
 -1 1 -7 211.29 13.58
 -1 1 -7 200.76 14.65
 -1 1 -7 187.61 13.16
 1 1 7 192.88 12.75
 -1 1 -7 179.19 13.04
 -1 1 -7 207.42 15.01
 1 1 7 210.01 12.92
 1 1 7 223.4 13.02
 -1 1 -7 221.59 13.71
 1 1 8 55.26 4.75
 -1 1 -8 47.39 5.27
 1 1 8 56.73 4.57
 -1 1 -8 55.06 6.34
 -1 1 -8 47.86 4.93
 -1 1 -8 61.75 7.26
 1 1 8 49.27 4.7
 1 1 8 48.48 4.69
 -1 1 -8 57.98 6.23
 -1 1 -8 44.49 5.2
 1 1 9 193.22 12.96
 1 1 9 196.68 12.88
 -1 1 -9 168.88 13.21
 -1 1 -9 199.67 14.2
 -1 1 -9 167.89 14.71
 1 1 9 232.75 13.44
 -1 1 -9 215.58 14.59
 -1 1 -9 165.28 13.85
 1 1 10 397.26 21.55
 1 1 10 334.41 21.24
 -1 1 -10 372.5 23.21
 -1 1 -10 312.06 22.36
 -1 1 -10 263.71 22.56
 1 1 10 395.02 21.91
 -1 1 -10 270.1 22.25
 -1 1 -11 291.45 20.19
 -1 1 -11 239.68 19.02
 1 1 11 291.73 17.84
 1 1 11 289.29 18.11
 -1 1 -11 265.62 19.58
 1 1 11 297.16 18.26
 -1 1 -11 222.83 17.35
 -1 1 -12 84.48 7.88
 1 1 12 90.92 8.17
 1 1 12 86.91 7.82
 1 1 12 99.71 7.16
 -1 1 -12 80.11 7.53
 -1 1 -12 90.44 10.29
 -1 1 -12 90.56 7.65
 -1 1 -12 97.38 10.13
 1 1 12 94.45 8.31
 1 1 13 7.62 3.33
 -1 1 -13 11.13 6.68
 1 1 13 6.03 2.34
 1 1 13 6.88 3.19
 1 1 13 11.3 4.12
 -1 1 -13 8.35 3.61
 1 1 14 30.34 3.38
 1 1 14 27.85 4.29
 -1 1 -14 36.01 6.82
 1 1 14 33.1 4.97
 1 1 15 19.4 3.15
 1 1 15 21.7 3.68
 -1 1 -15 18.22 5.02
 1 1 15 19.6 3.66
 1 1 16 47.72 4.3
 -1 1 -16 43.77 4.7
 1 1 16 37.68 4.08
 -1 1 -16 54.13 4.57
 1 2 -16 7.07 3.73
 -1 2 16 11.79 1.92
 -1 2 16 13.61 2.64
 -1 2 16 13.54 2.7
 -1 2 16 3.56 1.57
 1 2 -16 11.77 2.56
 1 2 -15 11.48 3.7
 1 2 -15 16.69 5.37
 -1 2 15 11.32 2.79
 -1 2 15 11.06 2.46
 -1 2 15 14.63 3.42
 -1 2 15 11.24 2.28
 -1 2 15 12.02 3.36
 1 2 -15 10.11 3.36
 -1 2 14 102.48 7.92
 1 2 -14 104.17 8.88
 -1 2 14 103.08 8.1
 -1 2 14 105.43 9.04
 1 2 -14 118.66 10.73
 1 2 -14 103.8 8.77
 -1 2 14 107.43 8.9
 -1 2 13 234.18 14.64
 -1 2 13 199.25 14.93
 -1 2 13 210.89 15.27
 1 2 -13 197.07 15.12
 1 2 -13 218.32 16.93
 1 2 -13 216.1 15.1
 -1 2 13 219.19 14.51
 -1 2 12 74.09 7.92
 -1 2 12 71.3 7.28
 1 2 -12 77.05 9.74
 1 2 -12 87.73 9.88
 1 2 -12 83.89 11.67
 1 2 -11 561.31 39.68
 1 2 -11 540.83 40.45
 -1 2 11 762.48 39.61
 -1 2 11 741.98 39.39
 1 2 -11 597.39 40.03
 1 2 -11 672.91 40.7
 -1 2 10 324.57 19.02
 1 2 -10 276.69 20.78
 1 2 -10 300.21 20.28
 1 2 -10 309.12 20.47
 1 2 -10 235.62 19.13
 -1 2 10 334.02 18.95
 -1 2 10 269.72 18.15
 -1 2 9 212.21 14.86
 1 2 -9 260.69 16.87
 1 2 -9 246.49 16.98
 1 2 -9 213.39 16.05
 1 2 -9 278.84 17.67
 -1 2 9 256.33 15.59
 -1 2 8 99.95 7.57
 1 2 -8 115.3 8.95
 -1 2 8 133.25 8.48
 1 2 -8 121.91 9.5
 -1 2 8 111.33 7.8
 -1 2 7 25.68 3.67
 -1 2 7 24.34 2.7
 1 2 -7 23.53 2.95
 1 2 -7 22.88 3.42
 1 2 -7 21.27 3.54
 -1 2 7 27.28 3.62
 -1 2 7 24.89 2.66
 -1 2 7 28.22 3.39
 1 2 -7 26.69 3.23
 1 2 -7 23.74 3.77
 1 2 -6 68.65 7.18
 1 2 -6 69.95 6.35
 1 2 -6 82.56 6.03
 -1 2 6 73.3 6.32
 1 2 -6 71.47 6.25
 -1 2 6 75.38 6.33
 1 2 -6 72.95 6.54
 1 2 -5 775.14 46.65
 1 2 -5 750.41 45.63
 1 2 -5 764.98 44.89
 1 2 -5 782.85 45.64
 1 2 -5 742.24 46.64
 -1 2 5 858.4 45.73
 1 2 -5 780.5 45.69
 -1 2 5 797.21 45.74
 1 2 -4 601.22 33.8
 1 2 -4 580.35 34.75
 1 2 -4 578.14 33.75
 -1 2 4 534.61 32.77
 1 2 -4 556.66 33.07
 -1 2 4 656.86 33.83
 1 2 -4 576.44 33.69
 1 2 -4 592.39 34.63
 1 2 -3 1091.67 67.15
 1 2 -3 1160.3 67.3
 1 2 -3 1144.65 66.43
 -1 2 3 1170.02 66.3
 1 2 -3 1086.24 65.9
 1 2 -3 1208.41 67.21
 1 2 -3 1188.96 66.31
 -1 2 3 1236.81 65.66
 1 2 -3 1150.63 66.4
 -1 2 2 62.76 4.24
 1 2 -2 63.41 5.04
 -1 2 2 54.52 3.58
 1 2 -2 56.29 5.15
 1 2 -2 55.97 4.33
 1 2 -2 58.68 4.43
 -1 2 2 61.72 4.24
 1 2 -2 60.11 4.2
 -1 2 2 60.84 3.83
 1 2 -2 57.92 5.36
 -1 2 1 1133.06 65.01
 -1 2 1 1195.4 65.02
 1 2 -1 1174.78 66.03
 1 2 -1 1230.05 65.53
 -1 2 1 1140.02 65.32
 1 2 -1 1218.03 66.26
 1 2 -1 1149.92 65.45
 -1 2 1 1147.45 65.59
 1 2 -1 1210.8 65.77
 1 2 -1 1130.04 66.61
 -1 2 1 1208.48 65.71
 -1 2 1 1272.85 65.41
 -1 2 1 1084.39 65.04
 -1 2 1 1219.83 65.75
 -1 2 1 1148.4 65.08
 -1 2 0 834.67 46.01
 1 2 0 775.7 47.1
 -1 2 0 820.5 46.05
 1 2 0 805.4 46.27
 -1 2 0 808.63 46.51
 1 2 0 801.39 46.41
 1 2 0 822.36 46.23
 -1 2 -1 1604.1 87.64
 1 2 1 1507.13 87.37
 1 2 1 1480.58 87.22
 1 2 1 1602.37 87.14
 1 2 1 1650.5 87.57
 1 2 1 1587.24 87.8
 1 2 1 1507.74 87.24
 -1 2 -2 299.02 18.75
 1 2 2 297.97 17.59
 -1 2 -2 311.58 18.01
 1 2 2 291.76 17.54
 1 2 2 313.51 18.09
 1 2 3 64.06 4.27
 -1 2 -3 55.02 4.5
 -1 2 -3 54.47 5.39
 1 2 3 60.34 4.18
 -1 2 -3 49.5 3.38
 1 2 4 611.38 34.36
 -1 2 -4 634.96 35.22
 -1 2 -4 545.01 33.67
 -1 2 -4 603.81 35.9
 1 2 4 673.23 35.13
 1 2 4 641.34 34.53
 -1 2 -4 568.27 34.79
 -1 2 -4 545.33 34.74
 -1 2 -5 48.31 4.79
 -1 2 -5 41.33 3.43
 -1 2 -5 41.82 5.21
 -1 2 -5 42.99 4.35
 -1 2 -5 39.35 4.23
 1 2 5 43.73 4.44
 1 2 5 52.66 4.2
 1 2 6 473.72 28.98
 -1 2 -6 479.55 29.7
 1 2 6 482.51 28.19
 1 2 6 500.34 28.34
 -1 2 -6 500.79 28.73
 -1 2 -6 443.35 28.34
 1 2 6 509.94 29.84
 -1 2 -6 448.06 29.36
 1 2 6 527.86 28.42
 -1 2 -6 454.96 30.7
 -1 2 -6 481.9 30.09
 1 2 7 7.78 2.2
 -1 2 -7 5.72 3.41
 1 2 7 3.91 1.85
 1 2 7 6.63 2.02
 1 2 7 5.54 1.9
 -1 2 -7 2.52 2.53
 1 2 8 19.64 3.07
 1 2 8 17.26 2.85
 -1 2 -8 20.9 4.07
 -1 2 -8 18 4.77
 1 2 8 19.41 2.98
 -1 2 -9 91.81 8.9
 1 2 9 79.57 6.62
 1 2 9 86.52 6.82
 -1 2 -9 84.16 8.52
 1 2 9 76.55 6.5
 -1 2 -9 81.53 7.53
 1 2 10 14.63 3.26
 1 2 10 15.69 3.7
 -1 2 -10 17.13 8.49
 -1 2 -10 10.74 5.65
 -1 2 -11 26.19 9.05
 1 2 11 40.41 5.23
 -1 2 -11 34.49 8.03
 1 2 11 35.98 4.55
 1 2 11 44.9 5.2
 -1 2 -11 33.44 7.32
 1 2 12 88.41 8.12
 1 2 12 114.32 9
 -1 2 -12 103.51 11.74
 -1 2 -12 79.87 10.36
 1 2 13 3.78 3.39
 1 2 13 6.24 3.36
 -1 2 -13 4.96 3.96
 -1 2 -13 10.42 4.06
 -1 2 -13 17.96 6.64
 1 2 13 5.86 2.55
 1 2 13 5.39 2.39
 1 2 14 4.71 1.86
 1 2 14 3.43 2.03
 1 2 14 4.77 2.75
 -1 2 -14 7.21 3.37
 1 2 14 -0.13 2.61
 -1 2 -15 32.66 4.92
 1 2 15 26.5 2.57
 1 2 15 22.89 3.18
 -1 2 -16 39.74 3.96
 -1 3 16 58.94 4.48
 -1 3 15 64.32 5.51
 1 3 -15 66.28 5.8
 -1 3 15 72.12 5.25
 1 3 -15 76.2 6.61
 1 3 -15 62.49 5.51
 -1 3 15 72.58 5.37
 -1 3 14 6.11 2.41
 1 3 -14 9.11 4.31
 -1 3 14 7.98 2.57
 -1 3 14 6.48 2.71
 1 3 -14 10.05 4.73
 -1 3 14 2.69 2.57
 1 3 -14 11.77 4.13
 -1 3 13 71.12 6.14
 1 3 -13 72.05 7.77
 1 3 -13 65.67 7.52
 1 3 -13 73.98 8.34
 -1 3 13 54.15 5.95
 1 3 -13 71.8 8.51
 -1 3 13 61.52 6.54
 -1 3 13 63 6.25
 -1 3 12 305.79 18.46
 1 3 -12 251.71 18.95
 1 3 -12 235.73 18.76
 -1 3 12 265.17 17.64
 1 3 -12 261.81 19.85
 -1 3 12 274.36 17.58
 -1 3 11 437.76 25.15
 1 3 -11 339.16 26.56
 -1 3 11 525.74 26.36
 -1 3 11 459.35 25.19
 1 3 -11 350.25 25.76
 1 3 -11 398.61 26.53
 1 3 -11 299.12 24.84
 -1 3 10 215.24 13.61
 1 3 -10 167.5 13.89
 -1 3 10 205.4 13.49
 1 3 -10 193.93 14.95
 1 3 -10 182.15 14.8
 1 3 -10 198.35 15.83
 1 3 -9 36.33 7.76
 1 3 -9 24.29 6.13
 1 3 -9 26.1 5.02
 -1 3 9 28.05 3.35
 1 3 -9 28.87 5.95
 -1 3 9 33.14 3.96
 1 3 -8 222.93 14.28
 -1 3 8 193.44 12
 1 3 -8 200.41 13.09
 1 3 -7 18.98 3.74
 1 3 -6 82.73 7.32
 -1 3 6 93.32 7.46
 1 3 -5 66.89 5.85
 1 3 -5 70.48 6.89
 -1 3 5 73.99 5.99
 1 3 -5 65.21 5.85
 1 3 -5 63.24 5.83
 -1 3 4 43.93 4.21
 1 3 -4 38.84 4.81
 1 3 -4 38.71 4.03
 1 3 -4 41.3 4.04
 -1 3 4 51.27 4.23
 -1 3 4 43.6 3.7
 1 3 -4 40.82 4.05
 -1 3 3 664.63 31.81
 1 3 -3 600.32 32.93
 1 3 -3 472.82 30.51
 1 3 -3 576.81 31.62
 -1 3 3 538.36 31.14
 -1 3 3 601.04 31.5
 -1 3 3 569.79 30.72
 1 3 -3 592.18 31.64
 1 3 -3 599.6 32.02
 1 3 -3 571.38 33.28
 1 3 -3 478.55 30.57
 -1 3 2 435.07 26.37
 -1 3 2 473.15 26.54
 1 3 -2 451.86 25.92
 1 3 -2 478.44 26.39
 1 3 -2 482.61 28.16
 1 3 -2 421.4 25.8
 -1 3 2 506.11 26.37
 1 3 -2 434.87 26.22
 -1 3 2 446.87 25.82
 1 3 -2 467.34 26.85
 1 3 -2 473.03 27.43
 1 3 -1 72.79 4.6
 -1 3 1 70.45 5.17
 -1 3 1 69.6 4.86
 1 3 -1 69.09 5.05
 1 3 -1 73.54 6.3
 -1 3 1 65.53 4.39
 1 3 -1 74.34 4.65
 1 3 0 759.35 41.35
 -1 3 0 719.48 40.65
 1 3 0 705.98 40.88
 1 3 0 656.03 42.22
 1 3 1 67.36 4.6
 -1 3 -1 61.28 4.29
 1 3 1 59.3 5.34
 -1 3 -1 63.62 4.46
 1 3 1 60.7 3.76
 1 3 1 59.15 4.06
 1 3 2 376.55 21.37
 -1 3 -2 364.75 22.12
 1 3 2 376.93 21.86
 -1 3 -2 347.15 22.21
 1 3 2 415.17 22.51
 1 3 2 352.24 23.01
 1 3 3 32.17 2.92
 -1 3 -3 28.77 3.16
 -1 3 -3 30.11 3.21
 1 3 3 31.74 3.33
 -1 3 -3 24.62 3.24
 1 3 4 33.15 3.14
 -1 3 -4 29.15 3.64
 -1 3 -4 37.02 4.1
 -1 3 -4 32.72 3.63
 -1 3 -4 30.98 3.58
 1 3 4 34.24 3.78
 -1 3 -5 85.58 7.31
 -1 3 -5 97.82 7.9
 1 3 5 90.29 7.46
 -1 3 -6 138.98 9.83
 1 3 6 143.25 9.35
 -1 3 -7 240.94 16.5
 1 3 7 250.86 15.97
 -1 3 -8 77.8 7.4
 1 3 8 65.27 5.67
 -1 3 -8 71.7 6.66
 1 3 8 77.31 6.06
 -1 3 -9 221.01 15.98
 -1 3 -9 256.64 16.97
 1 3 9 259.96 15.62
 1 3 9 229.27 15.22
 1 3 10 63.4 5.92
 -1 3 -10 67.74 8.13
 -1 3 -10 71.46 9.15
 -1 3 -10 71.43 10.5
 1 3 10 72.25 6.77
 -1 3 -10 78.63 9.12
 1 3 11 142.53 9.76
 1 3 11 129.39 9.64
 -1 3 -11 114.46 11.36
 -1 3 -11 117 11.4
 -1 3 -12 28.39 7.45
 -1 3 -12 26.73 6.62
 1 3 12 23.76 4.23
 1 3 13 16.96 2.91
 -1 3 -13 20.27 4.39
 1 3 13 14.55 3.38
 1 3 13 17.75 3.68
 -1 3 -13 16.31 4.44
 -1 3 -13 17.68 5.59
 -1 3 -14 40.55 4.4
 -1 3 -14 52.08 6
 -1 3 -14 48.5 4.83
 1 3 14 54.11 4.31
 1 3 14 46.85 4.56
 1 3 14 46.52 4
 1 3 14 41.32 4.54
 -1 3 -15 4.39 2.52
 1 3 15 1.57 1.46
 1 3 15 3.66 1.2
 1 3 15 1.48 1.38
 1 4 -14 10.76 3.13
 -1 4 14 12.57 2.16
 1 4 -14 13.13 3.41
 -1 4 14 11.11 2.38
 -1 4 14 14.49 2.23
 1 4 -14 11.16 2.74
 -1 4 13 7.44 2.12
 -1 4 13 9.4 2.64
 -1 4 13 7.82 2.78
 1 4 -13 11.71 3.76
 1 4 -13 9.86 4.45
 -1 4 13 5.6 2.29
 -1 4 13 7.8 2.4
 1 4 -13 9.09 4.39
 -1 4 12 64.22 5.9
 1 4 -12 87.22 9.24
 -1 4 12 62.9 5.77
 -1 4 12 75.05 6.16
 -1 4 12 74.38 6.58
 1 4 -12 71 7.59
 1 4 -12 73.32 7.38
 1 4 -11 132.25 13.76
 1 4 -11 152.13 13.09
 -1 4 11 206.2 12.94
 -1 4 11 183.02 12.1
 -1 4 11 178.69 11.98
 1 4 -11 181.73 13.28
 1 4 -10 21.72 5.84
 1 4 -10 13.59 7.03
 1 4 -10 15.01 5.06
 -1 4 10 23.69 3.6
 -1 4 10 24.37 3.53
 1 4 -9 244.81 16.9
 1 4 -9 194.5 15.13
 1 4 -9 213.35 15.44
 -1 4 9 213.2 14.09
 -1 4 8 5.24 2.23
 1 4 -8 2.97 3.93
 1 4 -7 306.27 20.02
 -1 4 -6 74.52 6.31
 -1 4 -7 3.56 2.72
 -1 4 -7 2.52 3.67
 1 4 7 4.77 2
 1 4 8 18.07 2.79
 -1 4 -8 18.19 3.53
 -1 4 -8 18.91 4.66
 -1 4 -9 109.47 9.69
 1 4 9 84.51 6.86
 -1 4 -9 84.74 8.39
 1 4 9 96.86 7.69
 -1 4 -9 114.98 9.96
 -1 4 -10 403.94 29.59
 1 4 10 568.56 29.75
 -1 4 -10 544.52 31.81
 -1 4 -10 539.87 31.11
 1 4 10 431.11 28.55
 -1 4 -10 539.62 31
 1 4 11 54.74 5.47
 1 4 11 45.29 4.66
 -1 4 -11 41.47 6.43
 -1 4 -11 30.38 5.42
 -1 4 -11 32.92 6.63
 1 4 11 41.11 4.43
 -1 4 -11 35.83 7.95
 1 4 12 155.65 10.69
 1 4 12 160.71 10.73
 -1 4 -12 150.72 12.54
 1 4 12 172.4 11.3
 -1 4 -12 143.17 11.81
 -1 4 -12 159.77 11.81
 -1 4 -13 78.17 6.27
 -1 4 -13 66.88 6.19
 1 4 13 79.04 6.06
 1 4 13 73.75 5.69
 1 4 13 87.85 5.78
 1 4 13 66.49 5.5
 -1 4 -13 69.29 6.46
 1 4 14 35.29 2.77
 1 4 14 28.5 2.91
 -1 5 13 36.79 3
 1 5 -13 20.79 3.04
 -1 5 12 22.34 2.65
 1 5 -12 25.07 3.81
 -1 5 12 27.77 3.01
 -1 5 12 24.84 2.58
 -1 5 11 78.26 6.3
 1 5 -11 95.54 7.2
 -1 5 11 103.52 6.79
 1 5 -11 110.19 8.28
 -1 5 11 91.12 6.85
 -1 5 10 57.55 4.96
 1 5 -10 54.34 5.62
 -1 5 10 49.39 4.41
 1 5 -9 142.84 11.86
 -1 5 9 162.83 10.23
 -1 5 9 176.35 10.85
 1 5 -8 113.88 9.65
 -1 5 8 99.88 7.31
 1 5 -8 87.72 8.1
 1 5 -7 93.44 7.95
 -1 5 -6 -0.14 2.81
 1 5 7 20.46 2.83
 -1 5 -7 16.34 4.13
 -1 5 -8 168.58 11.33
 1 5 8 143.93 9.57
 1 5 9 25.81 3
 -1 5 -9 24.79 4.28
 1 5 9 36.43 3.7
 -1 5 -9 24.09 6.6
 -1 5 -9 22.55 5.13
 -1 5 -10 107.19 9.03
 1 5 10 151.72 8.95
 1 5 10 138.71 8.33
 -1 5 -10 84.06 8.19
 -1 5 -10 107.58 9.96
 1 5 11 141.65 9.42
 1 5 11 164.41 9.36
 -1 5 -11 131.67 10.33
 1 5 11 128.89 9.01
 -1 5 -11 133.79 9.68
 1 5 12 31.05 2.63
 -1 5 -12 34.45 3.5
 1 5 12 28.17 2.77
 1 6 -10 30.59 3.24
 -1 6 9 50.49 3.73
 1 6 -9 36.08 4.02
 -1 6 -7 5.91 3.7
 -1 6 -8 22.01 3.83
 -2 -7 6 38.37 3.12
 -2 -7 5 0.53 1.26
 -2 -7 4 13.88 1.95
 2 -7 0 59.37 4.45
 2 -7 1 30.41 2.97
 2 -7 2 160.72 9.93
 2 -7 3 13.52 2.15
 2 -7 4 12.28 1.77
 2 -6 -10 -0.76 1.64
 -2 -6 10 2.69 1.5
 -2 -6 9 0.85 2.02
 2 -6 -9 1.35 2.21
 2 -6 -9 1.05 2.52
 2 -6 -8 0.79 2.5
 -2 -6 8 -1.27 2.86
 2 -6 -8 1.19 3.09
 -2 -6 7 20.51 2.96
 2 -6 -7 21.09 3.59
 2 -6 -7 19.87 4.32
 -2 -6 7 20.22 4.23
 2 -6 -6 13.48 4.12
 -2 -6 6 13.74 2.87
 2 -6 -6 12.3 3.2
 -2 -6 6 12.07 4.1
 2 -6 -5 47.7 5.96
 -2 -6 5 55.93 4.81
 2 -6 -5 54.64 5.31
 -2 -6 5 48.01 5.91
 2 -6 -4 2.92 3.73
 -2 -6 4 -0.84 3.31
 -2 -6 4 3.74 2.57
 2 -6 -4 0.88 2.47
 -2 -6 3 56.03 5.65
 2 -6 -3 65.82 6.45
 -2 -6 3 61.52 4.99
 -2 -6 3 55.76 5.78
 -2 -6 2 13.49 2.97
 2 -6 -2 16.92 4.28
 -2 -6 2 18.91 3.37
 -2 -6 1 153.65 10.56
 -2 -6 1 141.37 10.45
 2 -6 -1 172.06 11.49
 2 -6 0 51.64 5.65
 -2 -6 0 48.58 4.98
 -2 -6 0 41.97 4.19
 2 -6 0 38.27 4.96
 2 -6 1 83.08 6.97
 -2 -6 -1 67.43 6.48
 2 -6 1 61.53 6.26
 -2 -6 -2 19.38 3.9
 2 -6 2 16.91 3.63
 2 -6 2 17.54 3.92
 -2 -6 -3 16.05 3.9
 2 -6 3 19.52 3.8
 2 -6 3 16.02 3.98
 -2 -6 -4 29.88 4.66
 2 -6 4 34.08 5.35
 2 -6 4 32.92 4.39
 2 -6 5 21.88 3.75
 -2 -6 -5 11.36 3.93
 2 -6 5 15.45 4.5
 2 -6 6 141.23 9.29
 -2 -6 -6 131.92 9.94
 2 -6 6 127.13 10.32
 2 -6 7 37.2 4.93
 2 -6 7 52.34 4.51
 -2 -6 -7 42.94 4.83
 2 -6 8 32.57 3.23
 2 -6 8 24.85 3.75
 -2 -6 -8 35.41 3.72
 2 -6 9 46.78 4.1
 2 -5 -12 6.37 2.6
 -2 -5 12 5.64 2.39
 -2 -5 12 4.74 1.71
 2 -5 -12 6.34 2.53
 -2 -5 11 12.66 3.6
 2 -5 -11 20.75 4.01
 2 -5 -10 26.71 4.74
 2 -5 -10 25.27 5
 -2 -5 10 23.12 4.68
 2 -5 -9 13.56 4.75
 -2 -5 9 7.99 4.74
 2 -5 -9 15.65 4.41
 -2 -5 9 8.33 2.98
 -2 -5 9 9.12 3.56
 2 -5 -8 5.77 4.51
 -2 -5 8 5.83 3.82
 -2 -5 8 4.89 2.91
 2 -5 -8 7.89 4.85
 2 -5 -7 45.69 6.65
 -2 -5 7 42.77 5.07
 2 -5 -7 58.49 6.8
 -2 -5 7 48.85 7.22
 -2 -5 7 48.14 5.44
 2 -5 -6 426 26.85
 2 -5 -6 407.39 25.64
 -2 -5 6 426.5 25.3
 -2 -5 6 383.67 26.85
 2 -5 -6 435.82 26.68
 -2 -5 5 290.13 18.68
 2 -5 -5 311.46 20.05
 2 -5 -5 299.12 19.14
 -2 -5 5 301.93 20.56
 2 -5 -5 315.16 20.39
 -2 -5 4 352.14 22.34
 2 -5 -4 374.26 23.72
 2 -5 -4 356.22 22.68
 -2 -5 4 363.9 24
 2 -5 -4 404.32 23.57
 2 -5 -3 119.9 9.8
 2 -5 -3 132.53 9.53
 2 -5 -3 114.97 8.79
 -2 -5 3 118.17 9.99
 -2 -5 3 110.36 8.47
 -2 -5 2 71.01 6.52
 -2 -5 2 84.25 7.54
 2 -5 -2 85.07 7.65
 -2 -5 2 70.43 6.15
 2 -5 -2 85.84 6.87
 2 -5 -2 72.54 6.46
 -2 -5 1 5.96 2.93
 2 -5 -1 12.66 4.45
 -2 -5 1 4.45 2.53
 2 -5 -1 8.03 2.97
 -2 -5 1 6.87 3.11
 -2 -5 0 30.24 4.6
 2 -5 0 29.06 4.31
 -2 -5 0 32.09 4.12
 -2 -5 0 29.6 3.9
 2 -5 0 32.58 4.11
 2 -5 0 36.93 5.09
 -2 -5 -1 305.34 19.45
 2 -5 1 306.21 20.44
 -2 -5 -1 310.93 20.49
 2 -5 1 333.05 20.58
 2 -5 1 317.66 19.67
 2 -5 2 142.04 11.45
 2 -5 2 144.24 11.04
 -2 -5 -2 152 11.52
 2 -5 2 133.97 10.1
 -2 -5 -3 4.47 3.88
 2 -5 3 10.43 4.5
 2 -5 3 0.42 4.4
 2 -5 3 9.87 4.54
 2 -5 3 4.27 2.98
 2 -5 4 20.78 5.52
 2 -5 4 19.93 4.72
 2 -5 4 19.43 3.77
 -2 -5 -4 19.25 5.18
 2 -5 5 9.03 3.18
 2 -5 5 5.34 4.29
 2 -5 5 5.89 4.82
 2 -5 5 7.27 2.83
 -2 -5 -5 -1.06 4.68
 2 -5 6 129.3 11.34
 -2 -5 -6 120.45 10.65
 2 -5 6 144.08 9.36
 -2 -5 -6 121.54 10.26
 2 -5 6 104.88 9.32
 2 -5 6 129.2 9.81
 2 -5 7 35.46 6.37
 2 -5 7 35.91 4.78
 -2 -5 -7 33.02 5.43
 2 -5 8 136.5 10.6
 -2 -5 -8 144.34 11.29
 -2 -5 -8 165.98 11.7
 2 -5 9 64.7 6.1
 -2 -5 -9 83.09 7.06
 2 -5 10 32.15 4.49
 -2 -5 -10 32.09 4.1
 -2 -5 -11 76.03 5.3
 2 -5 11 58.12 5.35
 -2 -4 14 20.37 2.69
 2 -4 -14 24.38 3.41
 -2 -4 13 60.97 5.29
 2 -4 -13 60.88 6.09
 2 -4 -13 65.26 5.66
 -2 -4 13 51.52 5.32
 2 -4 -13 53.21 4.94
 2 -4 -12 253.61 16.14
 2 -4 -12 266.8 17.06
 -2 -4 12 230.47 16.37
 -2 -4 12 205.51 16.02
 2 -4 -12 292.52 16.88
 -2 -4 11 20.33 4.72
 2 -4 -11 11.39 4.62
 -2 -4 11 12 4.01
 2 -4 -11 13.52 5.03
 2 -4 -11 15.58 4.11
 2 -4 -10 152.59 12.91
 -2 -4 10 182.98 11.54
 -2 -4 10 159.09 12.41
 -2 -4 10 133.24 11.71
 -2 -4 10 146.18 12.44
 2 -4 -10 161 12.49
 2 -4 -10 161.02 12.03
 -2 -4 9 133.47 11
 -2 -4 9 159.57 10.34
 2 -4 -9 147.51 11.96
 -2 -4 9 140.85 11.67
 2 -4 -9 117.34 10.54
 -2 -4 9 112.71 10.26
 2 -4 -8 253.78 16.86
 -2 -4 8 209.12 15.93
 -2 -4 8 198.81 15.5
 -2 -4 8 251.23 15.16
 2 -4 -8 223.68 15.84
 2 -4 -8 231.45 16.46
 2 -4 -8 227.82 16.43
 -2 -4 8 236.97 16.76
 2 -4 -7 114.39 9.89
 -2 -4 7 104.15 9.25
 2 -4 -7 112.68 9.88
 2 -4 -7 128.64 10.32
 -2 -4 7 100.42 9
 -2 -4 7 120.38 8.91
 2 -4 -7 116.64 9.33
 -2 -4 6 38.09 5.01
 2 -4 -6 50.99 6.26
 2 -4 -6 46.14 5.35
 -2 -4 6 53.73 5.35
 -2 -4 6 45.08 5.21
 2 -4 -6 56.22 6.44
 2 -4 -6 50.92 6.27
 -2 -4 5 520.73 34.94
 2 -4 -5 645.06 35.96
 2 -4 -5 588.01 35.16
 2 -4 -5 660.12 36.07
 -2 -4 5 622.21 36.35
 -2 -4 5 574.89 34.61
 -2 -4 5 566.89 35.32
 2 -4 -4 263.1 16.99
 -2 -4 4 283.64 17.71
 2 -4 -4 263.4 16.95
 -2 -4 4 238.12 16.45
 -2 -4 4 240.7 15.95
 2 -4 -4 260.19 16.46
 -2 -4 3 127.22 8.34
 2 -4 -3 110.97 8.75
 2 -4 -3 126.97 9.14
 -2 -4 3 116.27 8.5
 -2 -4 3 95.83 7.85
 -2 -4 3 97.38 8.07
 -2 -4 3 124.99 9.6
 2 -4 -3 119.47 8.51
 2 -4 -2 87.94 7.51
 2 -4 -2 97.63 7.18
 -2 -4 2 89.26 7.18
 -2 -4 2 88.58 7.82
 -2 -4 2 75.79 6.58
 -2 -4 2 97.25 6.99
 2 -4 -2 92.55 7.29
 2 -4 -1 79.34 6.41
 2 -4 -1 75.56 6.17
 -2 -4 1 73.56 6.49
 2 -4 -1 77.04 6.82
 -2 -4 1 75.06 6.83
 -2 -4 0 164.11 11.48
 2 -4 0 165.93 11.73
 2 -4 0 165.87 11.55
 -2 -4 0 155.86 11.56
 2 -4 0 168.91 11.29
 -2 -4 0 167.99 11.08
 2 -4 1 223.4 15.52
 -2 -4 -1 225.91 14.81
 -2 -4 -1 250.51 15.95
 2 -4 1 261.45 15.75
 -2 -4 -1 236.17 15.16
 -2 -4 -1 230.43 14.99
 2 -4 1 226.99 15.04
 -2 -4 -1 220.03 15.53
 -2 -4 -2 133.96 9.82
 -2 -4 -2 140.31 10.51
 -2 -4 -2 122.76 8.87
 -2 -4 -2 124.66 9.25
 -2 -4 -2 134.12 9.44
 -2 -4 -2 135.86 10.26
 2 -4 2 124.37 9.83
 2 -4 2 136.86 10.29
 2 -4 2 138.44 9.63
 -2 -4 -3 4.04 2.6
 2 -4 3 3.25 2.33
 -2 -4 -3 3.66 3.7
 -2 -4 -3 6.66 3.84
 2 -4 3 2.31 3.79
 -2 -4 -3 2.99 2.78
 2 -4 3 1.94 3.05
 2 -4 3 6.02 3.89
 -2 -4 -3 4.61 3.46
 2 -4 4 42.82 6.14
 2 -4 4 33.13 4.43
 -2 -4 -4 39.24 4.63
 2 -4 4 27.27 4.81
 -2 -4 -4 48.28 5.81
 -2 -4 -4 43.26 5.29
 2 -4 4 53.59 5.84
 -2 -4 -4 41.83 5.54
 2 -4 4 39.56 4.98
 2 -4 5 92.77 7.55
 2 -4 5 75.36 8.55
 -2 -4 -5 89.93 8.14
 -2 -4 -5 94.07 8.44
 2 -4 5 86.09 7.7
 -2 -4 -5 81.33 7.36
 -2 -4 -6 96.21 9.42
 -2 -4 -6 98.97 8.67
 2 -4 6 105.36 10.26
 2 -4 6 101.39 8.92
 -2 -4 -6 110.56 9.5
 2 -4 6 118.5 8.75
 -2 -4 -7 168.23 12.88
 2 -4 7 195.26 12.6
 2 -4 7 173.03 13.24
 2 -4 7 182.32 12.53
 -2 -4 -7 165.5 13.34
 -2 -4 -7 169.6 13.41
 -2 -4 -7 170.84 13.58
 2 -4 8 8.07 5.27
 -2 -4 -8 5.04 3.75
 2 -4 8 5.45 3.92
 2 -4 8 9.24 4.67
 -2 -4 -8 5.28 4.63
 -2 -4 -8 4.95 4.6
 -2 -4 -8 8.86 4.76
 -2 -4 -9 62.78 6.86
 -2 -4 -9 73.22 7.73
 2 -4 9 64.16 7.89
 2 -4 9 71.2 7.31
 -2 -4 -9 64.97 7.23
 2 -4 9 72.55 6.74
 2 -4 10 28.88 4.33
 2 -4 10 26.73 5.29
 -2 -4 -10 18.13 5.03
 -2 -4 -10 19.76 5.38
 -2 -4 -10 21.95 4.48
 -2 -4 -10 19.75 4.18
 2 -4 10 17.46 4.2
 -2 -4 -11 282.56 16.05
 -2 -4 -11 251.34 16.41
 2 -4 11 231.81 16.2
 -2 -4 -11 224.89 15.49
 2 -4 11 220.87 15.75
 2 -4 12 33.87 4.26
 -2 -4 -12 30.89 3.59
 2 -4 12 33.43 3.98
 -2 -4 -12 40.21 4.71
 -2 -4 -12 41.8 3.89
 2 -3 -16 21.7 2.61
 -2 -3 16 16.41 2.19
 2 -3 -15 24.94 3.26
 -2 -3 15 27.74 3.66
 2 -3 -15 30.61 3.94
 -2 -3 14 20.79 3.89
 -2 -3 14 21.08 3.72
 2 -3 -14 14.55 4.26
 2 -3 -14 20.71 3.73
 2 -3 -14 23.42 4.15
 2 -3 -13 25.13 4.14
 2 -3 -13 23.36 4.95
 -2 -3 13 21.49 3.58
 2 -3 -13 24.54 4.56
 -2 -3 13 14.55 4.18
 2 -3 -13 16.72 5.14
 -2 -3 13 19.32 4.02
 2 -3 -12 109.98 9.17
 -2 -3 12 104.45 9.38
 -2 -3 12 97.46 8.73
 -2 -3 12 83.66 8.21
 2 -3 -12 102.35 8.96
 2 -3 -12 107.59 9.54
 2 -3 -12 99.04 9.55
 -2 -3 12 93.92 8.4
 2 -3 -12 121.21 9.17
 -2 -3 11 208.88 16.92
 2 -3 -11 262.5 17.79
 2 -3 -11 270.28 18.12
 -2 -3 11 255.42 18.02
 -2 -3 11 256.98 17.39
 -2 -3 11 243.4 17.34
 2 -3 -11 279.57 17.66
 2 -3 -11 267.15 17.87
 -2 -3 10 161.53 12.77
 2 -3 -10 169.93 13.36
 -2 -3 10 152.79 12.74
 2 -3 -10 173.69 13.6
 2 -3 -10 169.66 13.1
 -2 -3 10 177.18 13.25
 2 -3 -10 176.79 13.43
 -2 -3 10 185.6 13.69
 -2 -3 10 206.2 12.42
 -2 -3 9 36.91 5.49
 -2 -3 9 43.9 6.11
 2 -3 -9 36.16 5.79
 2 -3 -9 38.08 5.89
 2 -3 -9 34.83 5.67
 2 -3 -9 28.88 5.69
 2 -3 -9 41.58 6.23
 -2 -3 9 43.09 5.44
 -2 -3 9 34.36 5.05
 2 -3 -8 113.86 9.45
 2 -3 -8 99.86 9.13
 -2 -3 8 99.09 9.11
 -2 -3 8 109.58 9.22
 2 -3 -8 104.04 9.26
 -2 -3 8 125.29 8.37
 -2 -3 8 94.33 8.56
 -2 -3 7 101.02 8.36
 -2 -3 7 100.73 8.39
 2 -3 -7 115.69 9.02
 -2 -3 7 101.35 8.81
 2 -3 -7 101.29 8.58
 2 -3 -7 97.56 8.44
 -2 -3 7 92.97 7.93
 2 -3 -7 95.61 8.11
 -2 -3 7 94.99 8.09
 -2 -3 7 102.87 7.81
 -2 -3 6 25.78 3.96
 2 -3 -6 29.99 4.2
 -2 -3 6 33.76 3.39
 -2 -3 6 30.87 3.82
 2 -3 -6 27.24 4.37
 -2 -3 6 27.96 4.03
 2 -3 -6 27.59 4.71
 -2 -3 6 28.47 4.04
 -2 -3 6 31.35 4.97
 2 -3 -6 28.39 4.32
 2 -3 -6 32.68 4.21
 2 -3 -5 125.08 9.25
 2 -3 -5 137.06 9.91
 -2 -3 5 132.06 9.51
 2 -3 -5 123.3 9.28
 -2 -3 5 123.85 9.13
 -2 -3 5 123.48 8.6
 -2 -3 5 121.93 9.2
 2 -3 -5 130.26 9.6
 2 -3 -5 137.97 9.22
 -2 -3 4 159.81 9.92
 2 -3 -4 175.3 10.04
 -2 -3 4 154.35 10.96
 -2 -3 4 133.99 9.69
 -2 -3 4 139.38 10.13
 -2 -3 4 150.46 10.52
 2 -3 -4 158.78 10.57
 2 -3 -4 129.26 10.32
 2 -3 -4 150.31 10.27
 2 -3 -4 155.54 10.41
 -2 -3 4 155.5 10.44
 2 -3 -4 164.22 10.84
 -2 -3 3 225.91 15.33
 2 -3 -3 276.58 16.05
 2 -3 -3 228.29 15.59
 2 -3 -3 268.34 15.79
 -2 -3 3 270.39 16.08
 2 -3 -3 255.99 15.56
 2 -3 -3 269.08 15.88
 -2 -3 3 263.91 15.79
 -2 -3 3 216.99 14.96
 -2 -3 3 264.01 16.19
 -2 -3 2 313.69 19.13
 -2 -3 2 304.95 19.35
 2 -3 -2 319.26 19.21
 2 -3 -2 299.08 18.99
 -2 -3 2 325.83 19.52
 2 -3 -2 313.45 18.95
 2 -3 -1 883.3 49.96
 -2 -3 1 903.54 50.29
 -2 -3 1 833.16 50.31
 -2 -3 1 916.77 50.74
 2 -3 -1 823.12 49.97
 2 -3 -1 877.11 50.28
 -2 -3 0 490.91 28.31
 -2 -3 0 463.15 28.3
 -2 -3 0 509.69 28.72
 -2 -3 0 469.04 28.06
 2 -3 0 456.66 28.08
 2 -3 0 478.69 28.04
 2 -3 0 452.23 28.08
 2 -3 0 474.45 27.92
 -2 -3 -1 373.6 21.06
 -2 -3 -1 367.99 21.5
 2 -3 1 339.23 21.11
 -2 -3 -1 324.44 21.2
 2 -3 1 339.38 21.16
 2 -3 1 353.87 21.06
 -2 -3 -1 335.74 20.73
 2 -3 1 335.33 20.78
 -2 -3 -2 20.92 3.73
 -2 -3 -2 22.71 3.05
 -2 -3 -2 22.23 3.36
 2 -3 2 20.61 3.42
 2 -3 2 18.58 2.62
 -2 -3 -2 14.13 3.31
 2 -3 2 21.88 3.46
 2 -3 2 20.8 3.08
 2 -3 2 21.57 3.82
 -2 -3 -2 16.74 2.54
 -2 -3 -2 17.54 2.3
 2 -3 2 18.72 3.45
 -2 -3 -3 28.76 3.73
 -2 -3 -3 25.8 3.87
 2 -3 3 24.33 3.8
 2 -3 3 26.98 3.53
 2 -3 3 30.74 4.46
 2 -3 3 23.53 3.24
 -2 -3 -3 22.94 4.14
 2 -3 3 26.38 3.14
 -2 -3 -3 28.44 4.26
 2 -3 3 27.34 4.05
 2 -3 3 26.59 3.73
 -2 -3 -4 792.95 45.88
 -2 -3 -4 778.39 45.59
 2 -3 4 741.26 45.41
 2 -3 4 691.62 46.88
 2 -3 4 747.33 45.72
 -2 -3 -4 846 46.53
 2 -3 4 819.48 45.52
 2 -3 4 767.45 45.18
 2 -3 4 825.12 46.25
 2 -3 5 10.4 3.38
 -2 -3 -5 16.34 3.78
 -2 -3 -5 16.81 3.8
 -2 -3 -5 17.97 3.28
 2 -3 5 15.17 3.42
 2 -3 5 15.07 3.41
 -2 -3 -5 17.29 4.04
 -2 -3 -6 49.26 6.2
 -2 -3 -6 44.81 5.78
 2 -3 6 57.33 6.29
 2 -3 6 45.65 5.06
 -2 -3 -6 50.53 5.47
 -2 -3 -6 54.19 6.09
 2 -3 6 47.34 5.45
 -2 -3 -6 53.49 6.52
 2 -3 6 41.84 4.91
 2 -3 6 54.07 5.32
 -2 -3 -7 231.33 15.94
 -2 -3 -7 233.14 16.09
 2 -3 7 223.65 15.82
 2 -3 7 270.11 15.62
 2 -3 7 212.98 14.88
 -2 -3 -7 244.92 16.37
 2 -3 7 225.91 16.02
 2 -3 7 233.62 16.48
 -2 -3 -8 270.81 19.3
 2 -3 8 344.64 18.57
 -2 -3 -8 263.37 18.73
 -2 -3 -8 288.13 19.23
 -2 -3 -8 275.29 18.75
 2 -3 8 263.07 18.68
 2 -3 8 261.45 18.69
 2 -3 8 274.7 17.84
 2 -3 8 284.72 19.38
 -2 -3 -9 61.08 7.49
 -2 -3 -9 63.54 7.79
 -2 -3 -9 61.29 6.76
 2 -3 9 57.01 6.76
 2 -3 9 66.79 6.36
 -2 -3 -9 63.53 7.18
 2 -3 9 57.27 6.56
 2 -3 9 56.47 7.35
 -2 -3 -10 101.98 9.37
 2 -3 10 131.67 8.8
 -2 -3 -10 114.95 10.36
 2 -3 10 108.55 9.95
 -2 -3 -10 109.08 9.15
 2 -3 10 95.54 9.17
 2 -3 11 11.06 3.4
 2 -3 11 10.5 4.43
 -2 -3 -11 9.52 4.29
 -2 -3 -11 13.83 3.48
 -2 -3 -11 15.32 4.78
 -2 -3 -12 9.17 4.47
 2 -3 12 10.79 3.6
 -2 -3 -12 6.23 2.49
 -2 -3 -12 7.43 3.57
 2 -3 12 5.24 3.51
 -2 -3 -12 10.5 3.92
 2 -3 12 5.99 2.74
 -2 -3 -13 77.27 6.41
 2 -3 13 73.37 6.51
 2 -3 13 69.14 6.01
 2 -3 14 83.2 6.12
 -2 -3 -14 65.99 5.69
 -2 -2 17 42.34 3.64
 -2 -2 16 6.98 2.84
 2 -2 -16 -0.62 3.02
 2 -2 -16 6.65 2.63
 2 -2 -15 29.44 4.45
 -2 -2 15 24.54 3.32
 -2 -2 15 24.98 3.7
 2 -2 -15 30.21 3.98
 -2 -2 15 28.14 4.63
 2 -2 -15 24.89 5.13
 -2 -2 14 40.17 5.79
 -2 -2 14 28.38 4.61
 -2 -2 14 34.79 4.45
 2 -2 -14 31.74 6.1
 2 -2 -14 34.18 4.91
 2 -2 -14 33.99 5.4
 -2 -2 13 17.85 4.22
 -2 -2 13 17.96 4.14
 -2 -2 13 18.72 4.93
 -2 -2 13 18.95 4.22
 2 -2 -13 14.4 5.67
 2 -2 -13 23.57 5.57
 2 -2 -13 25.47 4.93
 -2 -2 12 27.62 5.49
 2 -2 -12 28.56 4.54
 2 -2 -12 25.98 5.15
 -2 -2 12 24.14 4.74
 2 -2 -12 27.2 5.69
 -2 -2 12 23.26 4.54
 -2 -2 12 23.41 4.62
 2 -2 -12 26.78 6.23
 -2 -2 11 9.32 3.93
 -2 -2 11 12.49 4.01
 -2 -2 11 7.11 4.16
 2 -2 -11 9.74 4.37
 2 -2 -11 13.25 4.91
 2 -2 -11 12.76 3.94
 2 -2 -11 11.61 4
 -2 -2 11 8.93 3.44
 2 -2 -11 11.49 5.57
 2 -2 -10 234.89 16.07
 2 -2 -10 238.51 16.23
 -2 -2 10 223.03 15.63
 2 -2 -10 220.99 15.59
 2 -2 -10 225.15 15.36
 -2 -2 10 230.87 16.08
 2 -2 -10 221.48 15.68
 -2 -2 10 218.88 15.17
 -2 -2 10 221.46 15.42
 2 -2 -9 172.02 12.2
 -2 -2 9 160.21 11.63
 -2 -2 9 166.1 11.99
 -2 -2 9 160.17 12.08
 2 -2 -9 168.26 12.04
 2 -2 -9 174.2 12.43
 -2 -2 9 157.27 11.65
 2 -2 -9 148.9 11.55
 2 -2 -9 165.27 11.93
 2 -2 -8 141.99 10.57
 2 -2 -8 141.04 10.5
 -2 -2 8 157.39 9.89
 2 -2 -8 144.69 10.82
 2 -2 -8 134.22 10.2
 -2 -2 8 145.18 10.36
 -2 -2 8 141.3 10.5
 2 -2 -8 143.26 10.57
 -2 -2 8 138.82 10.41
 -2 -2 8 141.23 10.71
 2 -2 -7 144.22 10.95
 -2 -2 7 155.68 12.88
 2 -2 -7 169.02 11.34
 -2 -2 7 171.18 11.46
 2 -2 -7 165.77 11.42
 2 -2 -7 157.82 11.23
 -2 -2 7 154.18 11.1
 2 -2 -7 148.13 11.24
 -2 -2 7 176.34 10.52
 2 -2 -7 165.7 11.32
 -2 -2 7 157.12 11.04
 -2 -2 7 160.99 11.26
 2 -2 -6 174.8 11.97
 2 -2 -6 183.6 11.95
 2 -2 -6 183.82 12.05
 -2 -2 6 164.23 13.31
 -2 -2 6 165.98 11.73
 2 -2 -6 187.83 11.15
 2 -2 -6 172.51 11.89
 2 -2 -6 179.21 12.06
 -2 -2 6 178.13 11.97
 -2 -2 6 182.62 12.07
 -2 -2 6 174.35 11.2
 -2 -2 6 192.02 12.4
 2 -2 -5 1350.13 73.4
 2 -2 -5 1286.79 73.15
 2 -2 -5 1432.08 73.49
 -2 -2 5 1217.58 72.46
 2 -2 -5 1110.64 72.94
 -2 -2 5 1264.38 74.79
 -2 -2 5 1365.21 73.46
 2 -2 -5 1308.52 73.24
 -2 -2 5 1327.3 73.26
 -2 -2 4 909.08 55.15
 2 -2 -4 920.65 53.71
 -2 -2 4 978.23 54.04
 -2 -2 3 391.65 22.7
 2 -2 -3 377.44 22.38
 -2 -2 2 69.34 4.91
 2 -2 -2 69.9 4.62
 2 -2 -2 66.02 4.59
 -2 -2 2 70.22 4.35
 2 -2 -2 77.42 5.19
 -2 -2 1 651.28 36.9
 2 -2 -1 639.38 36.48
 2 -2 -1 668.07 37.34
 2 -2 -1 680.3 37.68
 2 -2 0 255.2 15.92
 2 -2 0 241.59 15.43
 2 -2 0 267.59 16.09
 -2 -2 0 257.52 14.8
 -2 -2 0 270.86 15.39
 -2 -2 -1 289.78 16.37
 2 -2 1 295.69 17.45
 2 -2 1 309.29 18.11
 2 -2 1 276.76 17.51
 -2 -2 -1 278.37 16.95
 2 -2 1 289.67 18.08
 2 -2 2 362.27 22.15
 -2 -2 -2 368.22 21.55
 -2 -2 -2 371.09 21.06
 2 -2 2 378.11 23.01
 2 -2 2 378.51 22.61
 2 -2 3 391.43 25.01
 2 -2 3 424.1 25.85
 -2 -2 -3 429.17 24.09
 -2 -2 -3 415.76 24.42
 2 -2 3 440.34 26.29
 -2 -2 -4 216.86 12.65
 -2 -2 -4 180.48 12.19
 2 -2 4 205.64 13.7
 2 -2 4 181.77 12.22
 2 -2 4 175.82 12.1
 2 -2 4 148.05 11.31
 -2 -2 -4 181.68 11.97
 -2 -2 -4 186.77 12.53
 -2 -2 -4 198.35 11.28
 2 -2 4 191.26 11.99
 2 -2 4 203.35 12.01
 2 -2 4 215.96 13.49
 2 -2 4 173.08 11.61
 -2 -2 -4 175.53 12.06
 -2 -2 -5 294 17.56
 2 -2 5 283.54 18.74
 -2 -2 -5 290.4 17.55
 2 -2 5 263.69 16.77
 -2 -2 -5 265.45 17
 2 -2 5 225.56 16.02
 -2 -2 -5 266.06 16.14
 -2 -2 -5 289.69 16.49
 -2 -2 -5 267.62 16.83
 2 -2 5 280.9 17.24
 2 -2 5 280.69 17.19
 2 -2 5 270.61 18.35
 2 -2 5 251.24 16.32
 2 -2 6 221.56 13.44
 2 -2 6 201.6 13.79
 2 -2 6 214.58 14.12
 -2 -2 -6 226.64 14.57
 -2 -2 -6 196.42 13.82
 2 -2 6 203.14 13.11
 -2 -2 -6 209.45 14.23
 -2 -2 -6 204.54 14.06
 -2 -2 -7 525.66 31.55
 2 -2 7 499.58 31.37
 -2 -2 -7 488.61 30.87
 -2 -2 -7 526.39 31.7
 2 -2 7 482.65 30.09
 2 -2 7 575.6 30.71
 -2 -2 -8 326.85 21.69
 2 -2 8 334.18 21.55
 2 -2 8 360.58 20.37
 -2 -2 -8 308.29 20.85
 -2 -2 -8 313.03 21.49
 2 -2 9 17.98 3.94
 -2 -2 -9 16.31 4.83
 -2 -2 -9 14.17 5.52
 -2 -2 -9 12.25 3.34
 2 -2 9 14.65 4.45
 2 -2 9 13.82 4.14
 -2 -2 -10 89.93 7.47
 2 -2 10 71.03 7.05
 -2 -2 -10 88.55 9.15
 2 -2 10 96.57 8.48
 2 -2 10 98.7 8.69
 2 -2 10 92 8.33
 2 -2 11 105.22 9.2
 -2 -2 -11 120.25 10.43
 2 -2 11 108.3 9.51
 -2 -2 -11 118.9 9.87
 2 -2 11 112.2 9.72
 -2 -2 -11 107.84 8.34
 -2 -2 -12 44.75 5.74
 2 -2 12 36.17 4.74
 -2 -2 -12 47.65 6.27
 -2 -2 -12 35.14 6.18
 2 -2 12 41.32 5.63
 2 -2 12 38.18 5.64
 2 -2 13 3.97 3.39
 -2 -2 -13 4.02 3.85
 -2 -2 -13 3.13 3.08
 2 -2 13 1.9 3.2
 -2 -2 -13 4.85 3.98
 2 -2 14 13.81 3.14
 -2 -2 -14 12.57 3.38
 -2 -2 -14 14.51 3.59
 -2 -2 -15 24.24 3.14
 2 -2 15 20.37 2.7
 2 -2 15 19.34 2.41
 2 -1 -17 8.45 2.76
 -2 -1 17 7.07 1.97
 -2 -1 17 9.9 2.47
 2 -1 -17 3.33 2.13
 2 -1 -16 3.24 3.93
 -2 -1 16 5.11 2.8
 2 -1 -16 4.28 3.48
 2 -1 -15 67.59 7.9
 -2 -1 15 65.77 6.85
 2 -1 -15 65.78 7.47
 -2 -1 14 23.77 4.68
 2 -1 -14 25.97 4.07
 -2 -1 14 21.02 3.43
 2 -1 -14 26.21 6.15
 -2 -1 13 193.83 13.89
 2 -1 -13 192.37 13.2
 -2 -1 13 170.18 12.63
 2 -1 -13 185.98 14.76
 -2 -1 12 29.26 3.72
 -2 -1 12 43.24 5.85
 2 -1 -12 38.77 7.24
 2 -1 -12 42.6 5.41
 -2 -1 12 34.46 5.04
 -2 -1 12 42.1 4.77
 2 -1 -11 173.9 10.72
 2 -1 -11 141.06 10.31
 2 -1 -11 161.01 11.19
 -2 -1 11 148.17 10.58
 -2 -1 11 128.83 10.74
 -2 -1 11 141.1 10.91
 2 -1 -11 149.03 12.31
 2 -1 -11 138.61 10.11
 -2 -1 11 127.67 9.72
 2 -1 -10 127.88 9.8
 2 -1 -10 142.86 9.87
 -2 -1 10 133.94 10.35
 2 -1 -10 140.64 11.36
 2 -1 -10 154.54 10.59
 -2 -1 10 134.28 9.39
 -2 -1 10 133.7 9.97
 2 -1 -10 143.84 9.77
 -2 -1 10 128.9 10.2
 -2 -1 9 175.25 12.21
 2 -1 -9 183.22 12.03
 -2 -1 9 177.16 11.98
 2 -1 -9 191.44 13.19
 -2 -1 9 174.72 11.45
 2 -1 -9 192.6 11.97
 2 -1 -9 183.37 12.36
 2 -1 -9 188.11 12.88
 -2 -1 9 156.46 12.05
 2 -1 -9 165.09 11.69
 -2 -1 8 595.96 36.33
 -2 -1 8 587.71 35.7
 2 -1 -8 579.51 35.85
 2 -1 -8 633.71 36.46
 -2 -1 8 576.38 36.3
 -2 -1 8 612.68 36.23
 2 -1 -8 640.05 36.91
 2 -1 -8 634.57 36.22
 -2 -1 8 761.28 35.76
 2 -1 -8 599.35 36.04
 -2 -1 8 587.15 36
 -2 -1 8 633.31 38.53
 2 -1 -8 633.95 37.22
 2 -1 -8 569.26 35.82
 2 -1 -8 605.88 36.22
 2 -1 -8 637.39 37.03
 2 -1 -7 24.43 2.62
 2 -1 -7 20.83 3.36
 2 -1 -7 23.14 3.81
 2 -1 -7 21.88 2.53
 -2 -1 7 22.76 3.03
 2 -1 -7 21.85 3.07
 2 -1 -7 25.71 3.24
 -2 -1 7 21.86 2.95
 -2 -1 7 21.83 3.01
 -2 -1 7 24.59 4.17
 2 -1 -7 20.4 3.04
 -2 -1 6 847.91 49.99
 -2 -1 6 871.8 49.18
 2 -1 -6 851.84 48.8
 2 -1 -6 785.29 48.13
 2 -1 -6 818 48.63
 2 -1 -6 897.71 48.26
 2 -1 -6 853.76 48.98
 2 -1 -5 524.63 27.84
 2 -1 -5 483.26 28.32
 -2 -1 5 525.13 28.77
 -2 -1 5 483.23 29.36
 2 -1 -5 436.34 27.71
 2 -1 -5 448.28 28.16
 2 -1 -5 501.86 28.09
 2 -1 -4 2918.34 161.71
 2 -1 -4 3004.53 161.29
 2 -1 -4 2677.48 161.59
 2 -1 -4 2838.59 161.3
 -2 -1 4 2962.54 162.14
 2 -1 -4 2995.42 161.96
 2 -1 -4 2751.03 161.74
 -2 -1 4 2903.27 161.91
 2 -1 -3 48.7 3.66
 -2 -1 3 53.51 3.96
 -2 -1 3 42.73 3.61
 2 -1 -3 41.06 3.53
 -2 -1 2 1657.81 92.37
 2 -1 -2 1666.82 92.52
 -2 -1 2 1728.89 92.8
 -2 -1 2 1751.36 92.75
 2 -1 -2 1634.34 92.17
 2 -1 -2 1604.64 92.35
 2 -1 -2 1544.23 92.56
 -2 -1 1 5382.4 325.5
 -2 -1 1 5742.91 325.42
 -2 -1 1 5955.01 324.95
 2 -1 -1 5802.97 325.17
 2 -1 0 3544.72 189.03
 2 -1 0 3247.93 188.69
 -2 -1 0 3359.06 188.57
 2 -1 1 101.72 6.62
 -2 -1 -1 127.17 6.71
 -2 -1 -1 111.12 7.03
 -2 -1 -1 109.82 6.78
 2 -1 1 109.93 7.27
 2 -1 1 117.92 7.93
 2 -1 2 87.07 5.82
 2 -1 2 90.82 7.1
 -2 -1 -2 103.45 6.52
 2 -1 2 89.15 6.39
 -2 -1 -2 93.63 5.78
 -2 -1 -2 101.63 6.33
 -2 -1 -2 93.62 6.1
 -2 -1 -2 92.05 6.17
 -2 -1 -3 792.4 44.16
 2 -1 3 750.25 44.11
 -2 -1 -3 704.24 44.39
 -2 -1 -3 821.14 44.52
 -2 -1 -3 795.31 44.26
 -2 -1 -3 793.26 44.69
 -2 -1 -4 67.85 5.26
 -2 -1 -4 63.01 4.83
 -2 -1 -4 60.26 4.84
 2 -1 4 62.15 4.74
 -2 -1 -4 65.3 4.75
 -2 -1 -5 2192.03 120.51
 2 -1 5 2271.54 121.49
 2 -1 5 1954.45 119.69
 -2 -1 -5 2315.61 120.1
 2 -1 5 2257.03 121.82
 2 -1 5 2054.3 120
 -2 -1 -5 2177.53 120.27
 -2 -1 -5 2179.05 120.04
 2 -1 5 1999.33 119.85
 -2 -1 -5 2135.35 120.25
 2 -1 5 2087.48 119.57
 2 -1 6 310.2 18.68
 2 -1 6 282.98 18.12
 -2 -1 -6 302.81 18.71
 -2 -1 -6 315.42 18.71
 2 -1 6 286.32 18.41
 -2 -1 -6 303.86 19.09
 -2 -1 -6 303.4 18.99
 2 -1 6 318.54 20.58
 2 -1 6 310.23 18.87
 -2 -1 -6 313.35 19.28
 -2 -1 -6 298.9 18.84
 2 -1 6 310.8 20.25
 2 -1 6 332.61 18.4
 2 -1 6 285.63 17.84
 -2 -1 -7 258.98 17.2
 -2 -1 -7 282.36 18.19
 -2 -1 -7 275.05 17.84
 -2 -1 -7 290.42 17.76
 -2 -1 -7 246.22 17.63
 -2 -1 -7 285.24 18.38
 2 -1 7 259.53 17.16
 2 -1 7 307.25 16.9
 2 -1 7 255.37 16.98
 2 -1 7 287.28 18.1
 2 -1 7 300.59 17.94
 2 -1 7 283.49 17.8
 -2 -1 -7 341.17 18.01
 -2 -1 -7 287.71 18.16
 2 -1 8 669 41.54
 -2 -1 -8 725.58 42.12
 2 -1 8 594.15 41.14
 2 -1 8 753.2 42.28
 2 -1 8 753.28 42.22
 -2 -1 -8 720.13 42.27
 -2 -1 -8 657.99 41.36
 -2 -1 -8 748.71 42.6
 -2 -1 -8 671.83 42.43
 2 -1 8 869.47 41.22
 -2 -1 -9 816.88 45.64
 2 -1 9 836.83 45.46
 -2 -1 -9 842.58 45.57
 2 -1 9 801.93 45.21
 2 -1 9 649.47 44.03
 2 -1 9 714.13 44.55
 -2 -1 -9 792.72 45.67
 -2 -1 -10 116.93 9.41
 2 -1 10 96.62 8.29
 -2 -1 -10 111.67 9.57
 2 -1 10 110.68 8.66
 -2 -1 -10 118.5 10.19
 2 -1 10 100.87 8.96
 -2 -1 -11 87.86 8.42
 -2 -1 -11 89.49 8.74
 2 -1 11 74.65 7
 -2 -1 -11 82.96 7.81
 2 -1 11 83.9 7.87
 -2 -1 -12 87.49 7.69
 2 -1 12 80.64 7.52
 2 -1 12 92.64 8.17
 -2 -1 -12 86.25 8.52
 -2 -1 -12 95.77 8.99
 -2 -1 -13 137.44 10.19
 2 -1 13 104.32 8.97
 -2 -1 -13 113.41 9.76
 2 -1 13 119.06 9.46
 2 -1 13 139.56 10.59
 -2 -1 -14 5.46 3.09
 2 -1 14 7.92 2.56
 2 -1 14 5.55 3.31
 -2 -1 -14 12.33 4.48
 2 -1 14 7.15 2.48
 -2 -1 -14 5.22 3.06
 2 -1 15 8.45 2.87
 -2 -1 -15 17.54 3.64
 -2 -1 -15 10.32 2.45
 -2 -1 -16 7.01 1.88
 2 -1 16 5.01 1.54
 2 0 -17 0.61 2.66
 -2 0 17 1.31 2.07
 -2 0 17 0.68 2.02
 -2 0 17 -0.73 1.71
 2 0 -17 1.43 2.5
 -2 0 16 22.44 4.33
 2 0 -16 26.85 4.75
 -2 0 16 27.87 4.25
 2 0 -16 29.45 5.3
 -2 0 15 3.42 3.78
 -2 0 15 1.8 3.21
 -2 0 15 2.49 1.91
 -2 0 15 3.13 3.65
 2 0 -15 2.23 6.07
 2 0 -14 9.25 6.41
 -2 0 14 10.78 3.91
 -2 0 14 12.39 4.61
 -2 0 14 11.84 2.62
 -2 0 14 9.63 4.75
 2 0 -14 19.38 3.66
 -2 0 13 102.65 8.15
 -2 0 13 115.42 9.8
 2 0 -13 134.19 12.15
 -2 0 13 118.99 9.99
 2 0 -13 117.81 9.2
 -2 0 13 113.89 8.58
 2 0 -12 474.7 30.6
 -2 0 12 501.16 31.57
 -2 0 12 463.78 30.25
 2 0 -12 605.44 33.58
 2 0 -12 514.21 30.85
 -2 0 12 540.2 30.69
 -2 0 12 538.01 31.83
 2 0 -11 182.88 12.63
 -2 0 11 170.33 12.46
 -2 0 11 188.47 12.09
 -2 0 11 169.75 11.99
 2 0 -11 175.92 12.42
 -2 0 11 179.54 13.04
 -2 0 11 182.98 12.93
 2 0 -11 197.74 14.51
 -2 0 11 197.98 12.3
 2 0 -11 175.15 12.63
 -2 0 10 179.86 12.53
 2 0 -10 186.46 12.76
 -2 0 10 190.94 13.09
 -2 0 10 202.71 12.41
 2 0 -10 192.67 14.24
 2 0 -10 192.65 12.87
 2 0 -10 185.01 12.64
 -2 0 10 206.58 12.34
 -2 0 10 167.33 12.17
 -2 0 10 185.29 12.99
 2 0 -9 7.25 2.06
 2 0 -9 6.55 2.82
 -2 0 9 5.46 1.92
 -2 0 9 6.85 1.97
 2 0 -9 6.39 3.24
 2 0 -9 7.78 3.3
 2 0 -9 5.66 2.9
 2 0 -9 6.5 2.01
 2 0 -9 10.02 4.35
 -2 0 9 4.02 2.13
 2 0 -9 11.38 4.45
 -2 0 9 7.7 2.99
 -2 0 9 6.42 1.98
 -2 0 9 4.18 2.44
 2 0 -8 797.54 47.79
 2 0 -8 885.04 46.98
 2 0 -8 795.3 48.17
 2 0 -8 761.52 47.79
 -2 0 8 822.95 48.52
 2 0 -8 866.7 47.16
 -2 0 8 787.89 47.34
 2 0 -8 786.53 47.65
 -2 0 8 819.45 48.93
 2 0 -8 818.38 48.46
 -2 0 8 755.21 47.01
 2 0 -8 789.67 47.6
 2 0 -8 889.27 47.21
 -2 0 7 30.79 3.26
 -2 0 7 31.18 3.83
 2 0 -7 27.77 3.17
 2 0 -7 29.2 3.73
 2 0 -7 24.94 3.02
 -2 0 7 26.75 2.9
 -2 0 7 29.73 3.99
 2 0 -7 23.33 3.77
 2 0 -6 9.37 1.94
 2 0 -6 7.56 2.86
 2 0 -6 9.24 2.51
 2 0 -6 9.76 2.01
 -2 0 6 6.35 2.51
 -2 0 6 12.11 2.18
 2 0 -6 9.74 2.33
 -2 0 6 10.94 2.77
 -2 0 6 6.8 2.2
 -2 0 5 9807.04 541.28
 -2 0 5 9848.97 541.15
 2 0 -5 9643.49 540.92
 -2 0 5 9999 541.5
 -2 0 5 9412.76 541.36
 2 0 -5 9689.4 541.58
 2 0 -5 9331.17 541.2
 -2 0 4 570.43 35.44
 2 0 -4 600.82 35.1
 -2 0 4 626.8 35.3
 -2 0 4 638.71 35.58
 2 0 -4 622.75 35.41
 2 0 -3 1208.2 63.75
 2 0 -3 1195.05 63.75
 2 0 -3 1220.64 63.52
 -2 0 3 1282.5 63.89
 2 0 -2 1513.84 84.44
 2 0 -2 1499.55 84.23
 -2 0 2 1487.29 84.19
 -2 0 1 0.71 0.87
 2 0 -1 1.32 0.92
 -2 0 0 69.85 4.85
 -2 0 0 73.96 4.53
 2 0 0 69.56 4.53
 2 0 1 1722.57 96.41
 2 0 1 1696.64 96.34
 -2 0 -1 1714.98 96.57
 2 0 1 1737.82 96.68
 2 0 2 1489.96 87.63
 -2 0 -2 1565.2 87.65
 -2 0 -2 1540.42 88.01
 2 0 2 1646.67 87.99
 -2 0 -3 333.6 19.19
 -2 0 -3 305.35 19.29
 -2 0 -3 329.7 19.31
 2 0 3 316.7 18.93
 -2 0 -3 310.34 18.92
 -2 0 -4 420.57 25.94
 2 0 4 429.31 25.57
 2 0 4 443.01 26.1
 -2 0 -4 425.47 25.76
 -2 0 -4 440.64 25.93
 -2 0 -4 428.67 25.53
 2 0 5 1712.28 95.92
 -2 0 -5 1632.73 95.68
 -2 0 -5 1685.71 95.25
 2 0 5 1786.74 95.39
 -2 0 -5 1578.42 95.21
 -2 0 -5 1733.79 95.79
 -2 0 -5 1601.21 95.63
 -2 0 -6 257.62 18.52
 2 0 6 295.87 17.37
 -2 0 -6 278.73 18.8
 2 0 6 273.36 17.33
 -2 0 -6 278.22 18.64
 -2 0 -6 302.8 18.35
 -2 0 -6 280.67 18.32
 -2 0 -6 340.29 17.98
 -2 0 -6 286.72 17.88
 -2 0 -6 300.19 18.05
 -2 0 -6 278.9 17.89
 -2 0 -6 251.74 17.53
 2 0 6 313.76 18.5
 2 0 6 305.98 19.14
 2 0 6 289.91 17.59
 -2 0 -7 183.14 12.68
 -2 0 -7 161.65 12.56
 2 0 7 207.13 12.41
 -2 0 -7 196.43 12.59
 -2 0 -7 183.58 13.49
 2 0 7 205.49 12.13
 2 0 7 192.47 13.07
 2 0 7 209.7 14.07
 -2 0 -7 187.48 13.07
 -2 0 -7 184.22 12.93
 -2 0 -7 174.68 13.55
 2 0 7 194.16 12.3
 -2 0 -7 175.84 12.45
 2 0 7 194.62 11.98
 -2 0 -7 132.96 12.38
 -2 0 -7 200.81 12.91
 2 0 8 42.52 4.01
 2 0 8 32.2 3.78
 -2 0 -8 33.24 5.16
 -2 0 -8 30.59 5.93
 2 0 8 33.23 4.25
 2 0 8 42.8 3.82
 -2 0 -8 34.44 5.27
 2 0 8 38.79 4.19
 -2 0 -8 33.4 5.56
 -2 0 -8 27.55 4.84
 -2 0 -8 28.56 4.49
 -2 0 -9 396.72 28.02
 -2 0 -9 584.41 29.37
 -2 0 -9 445.69 28.57
 2 0 9 424.42 27.45
 2 0 9 487.13 27.77
 2 0 9 499.27 27.76
 2 0 9 458.64 27.33
 -2 0 -9 454.18 27.92
 -2 0 -9 368.34 28.26
 2 0 9 473.97 27.96
 2 0 10 506.43 31.19
 -2 0 -10 533.91 31.43
 -2 0 -10 526.97 32.12
 2 0 10 522.48 31.44
 -2 0 -10 467.42 32.2
 -2 0 -10 568.85 32.33
 2 0 10 539.82 31.55
 2 0 10 483.48 30.83
 -2 0 -11 4.65 4.6
 2 0 11 0.28 2.27
 2 0 11 0.7 2.59
 2 0 11 0.64 2.38
 2 0 11 2.2 2.84
 -2 0 -11 6.09 5.41
 2 0 12 7.07 2.75
 -2 0 -12 9.32 5.6
 2 0 12 5.27 3.44
 2 0 12 1.46 2.65
 -2 0 -12 6.97 4.34
 2 0 12 4.06 2.48
 2 0 13 16.24 3.24
 -2 0 -13 21.74 5.87
 2 0 13 20.42 4.16
 -2 0 -13 23.55 4.58
 2 0 13 18.88 3.32
 2 0 14 2.46 2.79
 -2 0 -14 6.36 4.58
 -2 0 -14 1.37 2.56
 2 0 15 3.15 2.19
 -2 0 -15 2.16 3.2
 2 0 15 2.16 2.84
 -2 0 -16 7.54 2.19
 2 0 16 3.54 1.87
 2 1 -17 10.8 3.15
 -2 1 17 6.78 1.85
 2 1 -17 12.25 2.48
 -2 1 16 3.9 1.86
 2 1 -16 6.27 4.68
 -2 1 16 3.24 2.44
 -2 1 16 3.82 2.86
 2 1 -16 10.28 3.42
 -2 1 15 75.64 6.07
 -2 1 15 68.68 7.04
 2 1 -15 70.74 6.37
 -2 1 15 73.44 6.92
 -2 1 15 60.47 5.52
 -2 1 14 29.63 3.97
 -2 1 14 28.59 5.1
 2 1 -14 23.61 5.19
 -2 1 14 24.74 3.65
 2 1 -14 15.52 4.73
 -2 1 13 212.2 13.83
 2 1 -13 191.88 14.2
 2 1 -13 210.58 14.57
 -2 1 13 185.87 14.07
 -2 1 13 203.1 13.6
 -2 1 13 215.24 14.93
 -2 1 13 189.67 14.62
 -2 1 12 42.78 5.66
 -2 1 12 43.3 5.95
 2 1 -12 50.04 6.51
 -2 1 12 46.73 4.97
 -2 1 12 47.07 5.02
 2 1 -12 42.01 6.63
 2 1 -11 173.25 12.42
 2 1 -11 170.27 12.53
 -2 1 11 164.39 11.89
 2 1 -11 139.01 13.36
 -2 1 11 159.96 12.08
 2 1 -10 143 11.89
 -2 1 10 156.68 10.74
 -2 1 10 144.6 10.37
 2 1 -10 115.57 11.56
 2 1 -10 146.14 12.73
 2 1 -9 185.06 13.1
 2 1 -9 160.89 12.6
 2 1 -9 150.13 13.16
 2 1 -9 172.53 12.93
 -2 1 9 198.39 12.04
 -2 1 8 662.09 37.07
 -2 1 8 660.26 35.5
 2 1 -8 594.91 36.39
 -2 1 8 654.22 36.96
 -2 1 8 623.3 36.56
 2 1 -8 633.42 37.87
 -2 1 8 568.23 35.01
 2 1 -8 631.99 36.46
 2 1 -8 615.85 36.2
 2 1 -8 632.59 38
 -2 1 8 698.84 35.5
 2 1 -8 577.77 35.95
 2 1 -8 511.57 35.95
 2 1 -8 480.18 35.52
 2 1 -7 27.2 3.31
 2 1 -7 22.58 4.5
 2 1 -7 20.85 3.23
 -2 1 7 23.84 3.49
 -2 1 7 26.35 2.85
 -2 1 7 31.08 3.78
 -2 1 7 29.21 3.54
 2 1 -7 20.36 3.16
 -2 1 7 21.42 2.53
 2 1 -7 23.96 4.09
 2 1 -7 25.46 4.12
 2 1 -7 24.35 3.69
 2 1 -7 22.34 3.92
 -2 1 7 30.24 2.91
 2 1 -6 809.37 50.65
 -2 1 6 882.23 50.02
 -2 1 6 869.28 50.22
 -2 1 6 885.97 49.42
 2 1 -6 848.7 49.72
 2 1 -6 852.14 50
 2 1 -6 821.76 49.57
 -2 1 6 875.01 49.63
 2 1 -5 496.92 28.61
 2 1 -5 471.37 28.81
 -2 1 5 506.36 28.85
 -2 1 5 506.99 28.42
 -2 1 5 448.11 28.91
 -2 1 5 502.83 28.33
 2 1 -5 430.23 29.34
 2 1 -4 2642.49 155.7
 -2 1 4 2952.98 155.94
 -2 1 4 2858.79 155.5
 -2 1 4 2928.58 155.42
 2 1 -4 2277.76 156.09
 2 1 -4 2800.32 155.97
 2 1 -3 39.53 3.82
 2 1 -3 42.08 3.81
 -2 1 3 48.29 3.55
 -2 1 3 42.29 3.73
 -2 1 3 49.58 3.21
 -2 1 2 1609.87 90.07
 -2 1 2 1624.64 89.71
 2 1 -2 1425.62 90.23
 -2 1 2 1631.45 90.2
 2 1 -2 1632.38 90.3
 -2 1 2 1641.77 90.12
 -2 1 1 5604.67 316.03
 -2 1 1 5449.42 316.35
 -2 1 1 5841.48 316.35
 -2 1 1 5698.96 316.18
 2 1 -1 5702.54 316.33
 -2 1 0 3343.45 186
 2 1 0 3192.31 185.91
 -2 1 0 3247.9 185.61
 2 1 0 3474.64 186.07
 -2 1 0 3405.5 186.04
 2 1 0 3345.55 185.71
 -2 1 -1 111.16 6.79
 2 1 1 107.39 7.1
 2 1 1 115.61 6.87
 2 1 1 117.91 7.11
 -2 1 -1 89.58 7.23
 2 1 1 104.42 6.84
 -2 1 -2 86.57 5.6
 2 1 2 96.93 5.75
 2 1 2 83.31 6.25
 2 1 2 91.69 6.26
 -2 1 -2 85.38 5.99
 -2 1 -3 768.56 45.19
 -2 1 -3 771.66 45.52
 2 1 3 858.26 45.62
 -2 1 -4 61.52 4.66
 -2 1 -4 56.21 5.23
 -2 1 -4 61.94 5.01
 2 1 4 70.57 5.15
 2 1 4 62.62 5.07
 -2 1 -4 63.43 5.88
 2 1 5 2365.28 124.05
 2 1 5 2243.67 123.97
 -2 1 -5 2137.58 124.87
 -2 1 -5 1967.29 123.64
 -2 1 -5 2341.94 123.45
 -2 1 -5 2074.47 123.45
 -2 1 -6 296.73 19.47
 2 1 6 325.07 18.81
 -2 1 -6 307.52 19.1
 2 1 6 316.46 19.74
 -2 1 -6 290.99 19.01
 2 1 6 293.72 19.81
 2 1 6 314.26 19.82
 -2 1 -6 318.94 20.88
 2 1 6 333.24 18.91
 -2 1 -6 298.9 19.26
 2 1 6 328.6 18.99
 2 1 7 290.52 17.79
 2 1 7 316.35 17.82
 -2 1 -7 269.14 18.18
 2 1 7 322 17.82
 -2 1 -7 269.52 17.99
 2 1 7 290.57 17.62
 -2 1 -7 243.11 17.85
 -2 1 -8 675.99 45.19
 -2 1 -8 683.37 45.27
 2 1 8 762.95 45.11
 2 1 8 776.18 45.02
 2 1 8 794.92 44.97
 2 1 8 827.08 45.09
 2 1 9 873.33 49.52
 -2 1 -9 969.55 51.16
 -2 1 -9 761.69 50.5
 -2 1 -9 750.64 49.78
 2 1 9 795.31 49.38
 2 1 9 835.51 49.63
 2 1 9 965.15 50.02
 2 1 9 853.5 49.33
 -2 1 -9 862.92 50.42
 2 1 10 140.06 9.63
 -2 1 -10 84.04 11.52
 -2 1 -10 98.3 10.44
 2 1 10 134.21 9.2
 -2 1 -10 125.61 11.32
 2 1 10 112.63 9.08
 2 1 10 112.17 8.65
 2 1 11 94.42 7.64
 -2 1 -11 108.25 11.1
 2 1 11 92.49 8.08
 2 1 11 100.39 8.07
 -2 1 -11 66.79 7.65
 -2 1 -11 73.49 9.42
 -2 1 -11 89.67 9.9
 2 1 12 103.63 8.78
 2 1 12 94.5 8.09
 -2 1 -12 88.13 10.2
 -2 1 -12 99.19 8.43
 -2 1 -12 98.33 8.07
 2 1 12 104.98 8.62
 -2 1 -12 121.99 10.75
 -2 1 -13 134.51 12.09
 2 1 13 140.92 10.64
 2 1 13 135.14 9.34
 2 1 13 145.9 10.47
 2 1 13 122.47 9.85
 -2 1 -14 5.06 4.97
 2 1 14 3.73 2.43
 2 1 14 5.43 3.06
 2 1 15 10.83 2.15
 2 1 15 10.7 3.02
 -2 1 -15 8.79 3.91
 2 1 15 11.72 2.85
 2 1 16 2.33 1.45
 -2 1 -16 8.52 2.02
 -2 2 17 37.85 3.25
 2 2 -17 31.73 3.54
 2 2 -16 7.44 2.43
 -2 2 16 5.32 1.62
 -2 2 16 7.3 1.95
 -2 2 16 3.56 2.59
 2 2 -16 0.58 3.85
 2 2 -16 7.78 2.4
 -2 2 16 5.91 2.54
 -2 2 15 19.64 3.45
 2 2 -15 27.1 4.57
 2 2 -15 30.54 5.96
 -2 2 15 34.48 4.81
 -2 2 15 34 3.9
 2 2 -15 37.67 5.12
 -2 2 15 31.6 4.51
 -2 2 15 31.36 3.63
 -2 2 14 40.43 5.39
 2 2 -14 43.07 7.52
 -2 2 14 45.06 4.72
 -2 2 14 42.64 4.75
 2 2 -14 39.84 6.13
 2 2 -14 40.29 6.44
 -2 2 14 37.16 5.65
 2 2 -13 26.78 6.34
 -2 2 13 18.47 4.23
 -2 2 13 24.56 4.05
 -2 2 13 18.79 4.43
 2 2 -13 21.63 6.94
 2 2 -13 21.62 6.15
 -2 2 13 18.05 3.74
 2 2 -12 28.33 7.17
 2 2 -12 40.48 9.46
 2 2 -12 44.78 8.06
 -2 2 12 29.24 4.68
 -2 2 12 28.02 4.56
 2 2 -12 27.09 6.25
 2 2 -12 31.14 6.84
 -2 2 11 5.81 3.11
 2 2 -11 15.91 8.06
 -2 2 11 12.26 3.51
 -2 2 11 9.78 4.23
 2 2 -11 10.71 6.19
 2 2 -11 11.12 6.49
 2 2 -10 193.22 16.02
 2 2 -10 191.33 16.84
 2 2 -10 203.24 15.99
 -2 2 10 253.67 15.16
 -2 2 10 288.82 15.9
 -2 2 10 250.79 15.03
 2 2 -10 168.87 15.15
 2 2 -9 138.86 11.58
 2 2 -9 159 12.49
 -2 2 9 177.63 11.24
 -2 2 9 177.69 11.28
 -2 2 9 147.82 10.5
 2 2 -9 168.53 13.47
 2 2 -9 170.1 12.56
 2 2 -8 150.92 11.07
 -2 2 8 145.61 9.93
 -2 2 8 136.21 9.44
 2 2 -8 180.05 12.06
 2 2 -8 155.33 11.13
 2 2 -8 137.35 10.39
 -2 2 7 169.55 11.92
 2 2 -7 150.15 12.71
 -2 2 7 182.53 10.79
 2 2 -7 154.82 11.61
 2 2 -7 156.9 11.84
 -2 2 7 177.47 12.09
 2 2 -7 157.96 11.08
 2 2 -7 168.2 11.02
 2 2 -7 159.1 13
 2 2 -7 182.2 11.68
 -2 2 7 149.96 10.2
 2 2 -6 175.74 11.72
 2 2 -6 183.66 12.34
 2 2 -6 179.38 13.38
 2 2 -6 185.05 12.52
 2 2 -6 171.95 13.43
 -2 2 6 187.22 12.35
 -2 2 6 179.78 11.36
 -2 2 6 174.59 12.5
 -2 2 5 1370.62 76.57
 2 2 -5 1297.78 77.13
 2 2 -5 1335.91 77.65
 2 2 -5 1309.06 78.66
 2 2 -5 1330.47 78.83
 -2 2 5 1446.9 77.74
 2 2 -5 1384.2 77.82
 -2 2 4 904.8 49.09
 2 2 -4 862.76 51.11
 2 2 -4 891.28 51.14
 2 2 -4 836.76 50.02
 -2 2 4 926.26 50.05
 -2 2 4 830.93 48.84
 2 2 -4 878.83 50.11
 -2 2 3 390.27 21.04
 2 2 -3 364.76 21.23
 2 2 -3 351.93 21.07
 2 2 -3 323.22 20.85
 -2 2 3 362.78 20.28
 2 2 -3 313.34 21.9
 2 2 -3 342.27 21.96
 -2 2 2 60.32 3.7
 -2 2 2 69.97 4.6
 2 2 -2 71.39 4.9
 2 2 -2 52.55 4.51
 2 2 -2 69.86 5.95
 -2 2 2 68.27 4.73
 -2 2 2 71.36 4.45
 -2 2 2 60.12 4.09
 2 2 -2 68.85 5.57
 -2 2 1 576.93 34.59
 2 2 -1 602.88 36.38
 -2 2 1 688.62 35.5
 2 2 -1 640.52 35.84
 -2 2 1 602.52 34.71
 -2 2 1 622.84 35.06
 2 2 -1 650.25 35.3
 2 2 -1 636.7 35.39
 -2 2 1 610.22 35.36
 2 2 0 267.92 14.27
 -2 2 0 225.09 14.33
 2 2 0 232.17 14.72
 2 2 0 251.51 14.87
 -2 2 0 245.2 14.67
 2 2 0 246.95 14.4
 2 2 1 277.34 16.32
 -2 2 -1 271.71 16.19
 2 2 1 250.64 15.81
 2 2 1 287.01 16.25
 2 2 1 299.98 16.59
 2 2 2 342.35 20.84
 2 2 2 395.92 21.43
 -2 2 -2 337.76 21
 2 2 2 337.13 20.76
 -2 2 -2 380.57 21.24
 -2 2 -3 364.12 24.69
 2 2 3 451.23 25.21
 2 2 3 424.98 23.92
 2 2 3 446.87 24.76
 -2 2 -3 399.21 24.95
 -2 2 -4 205.86 13.85
 -2 2 -4 197.42 12.65
 2 2 4 208.16 12.28
 -2 2 -4 175.28 12.27
 2 2 4 182.13 11.22
 2 2 5 291.46 17.67
 -2 2 -5 244.46 16.6
 2 2 5 301.8 16.94
 -2 2 -5 285.75 18.14
 -2 2 -5 294.29 17.09
 -2 2 -5 282.68 18.41
 -2 2 -5 266.95 19.1
 2 2 5 304.45 17.03
 2 2 5 301.26 18.32
 -2 2 -5 247.58 17.63
 2 2 6 206.62 14.24
 -2 2 -6 232.71 14.06
 2 2 6 221.5 13.49
 -2 2 -6 188.47 13.51
 2 2 6 232.44 13.66
 2 2 7 545.4 31.59
 -2 2 -7 450.67 31.45
 2 2 7 526.43 31.37
 2 2 7 572.98 31.65
 -2 2 -7 526.23 31.98
 -2 2 -7 628.86 32.68
 2 2 8 323.23 20.42
 -2 2 -8 279.28 20.59
 2 2 8 360.68 20.83
 2 2 8 353.29 20.67
 -2 2 -8 325.11 21.19
 -2 2 -8 371.63 21.99
 2 2 8 342.74 20.68
 2 2 9 14.81 3.37
 -2 2 -9 27.4 6.28
 -2 2 -9 11.65 3.79
 -2 2 -9 10.94 7.51
 2 2 9 13.18 3.03
 2 2 9 19.63 3.43
 -2 2 -9 24.2 4.78
 -2 2 -10 89.92 11.23
 2 2 10 97.32 7.91
 -2 2 -10 88.65 9.67
 -2 2 -10 102.75 10.36
 -2 2 -11 93.66 12.08
 2 2 11 102.1 8.44
 -2 2 -11 89.87 10.53
 2 2 11 127.23 8.99
 -2 2 -11 95.23 10.55
 2 2 12 46.18 5.32
 2 2 12 47.59 5.69
 -2 2 -12 45.22 8.21
 -2 2 -12 56.89 9.38
 -2 2 -12 43.6 7.92
 2 2 13 5.7 2.79
 2 2 13 3.79 2.24
 2 2 13 2.76 2.88
 -2 2 -13 7.43 3.62
 -2 2 -13 10.32 5.78
 -2 2 -13 11.98 6.09
 2 2 13 4.5 1.98
 2 2 14 15.47 2.34
 2 2 14 13.26 3.24
 2 2 14 13.07 3.02
 2 2 14 12.44 2.79
 -2 2 -14 19.42 5.03
 2 2 15 22.39 2.66
 -2 2 -15 31.5 4.15
 2 2 15 30.72 3.26
 2 3 -16 21.73 2.47
 2 3 -16 15.77 2.81
 -2 3 16 21.49 2.71
 -2 3 16 20.25 2.22
 -2 3 15 36.15 3.61
 -2 3 15 27.5 3.58
 -2 3 15 34.34 3.62
 2 3 -15 32.64 4.47
 2 3 -15 34.72 4.58
 -2 3 15 32.85 4.1
 2 3 -15 41.21 5.12
 -2 3 14 24.49 3.73
 -2 3 14 26.81 3.62
 -2 3 14 24.61 3.63
 2 3 -14 20.75 5.23
 2 3 -14 25.01 5.47
 -2 3 14 19.1 3.54
 -2 3 14 23.49 4.13
 2 3 -14 27.94 5.46
 -2 3 13 25.67 4.08
 2 3 -13 29.22 6.24
 -2 3 13 23.36 3.91
 -2 3 13 30.06 4.37
 2 3 -13 24.14 6.17
 2 3 -13 26.01 6.05
 -2 3 13 25.07 4.63
 -2 3 12 116.22 9.49
 -2 3 12 106.39 8.7
 2 3 -12 118 11.88
 2 3 -12 125.02 10.7
 -2 3 12 98.62 8.69
 2 3 -12 113.04 10.73
 2 3 -11 190.83 18.56
 -2 3 11 262.47 17.08
 2 3 -11 253.63 18.4
 -2 3 11 325.01 18.26
 -2 3 11 280.81 17.13
 2 3 -11 219.09 18.02
 2 3 -10 151.34 12.87
 2 3 -10 154.37 13.8
 -2 3 10 185.93 11.73
 2 3 -10 161.69 12.96
 2 3 -10 126.28 11.59
 -2 3 10 182.2 11.67
 -2 3 9 43.92 4.48
 2 3 -9 40.77 7.97
 2 3 -9 31.12 6.48
 2 3 -9 41.28 5.4
 2 3 -9 37.78 6.28
 2 3 -8 112.92 9.46
 2 3 -8 123.11 9.71
 -2 3 8 121.29 8.35
 2 3 -8 98.51 8.5
 2 3 -7 110.34 9.06
 -2 3 7 115.52 8.04
 2 3 -6 23.31 3.34
 2 3 -5 128.92 10.73
 -2 3 5 133.47 9.44
 2 3 -5 125.07 10.38
 2 3 -5 129.88 9.46
 2 3 -5 136.84 9.72
 2 3 -4 162.66 10.83
 -2 3 4 169.97 10.52
 2 3 -4 144.72 10.43
 2 3 -4 147.67 11.64
 2 3 -4 154.61 12.07
 2 3 -4 152.36 11.42
 -2 3 4 159.75 10.4
 2 3 -3 267.29 15.91
 2 3 -3 266.11 17.26
 2 3 -3 261.72 16.09
 2 3 -3 262.12 18.05
 2 3 -3 252.51 17.52
 -2 3 3 280.33 16.21
 2 3 -3 276.37 16.8
 -2 3 3 266 16.46
 2 3 -2 322.53 18.91
 2 3 -2 323.31 20.39
 2 3 -2 335.22 19.66
 -2 3 2 322.29 18.83
 2 3 -2 319.82 19.16
 2 3 -2 331.85 18.36
 -2 3 2 285.25 17.57
 -2 3 2 340.31 18.37
 2 3 -1 883.8 49.13
 2 3 -1 856.79 50.84
 -2 3 1 910.05 48.84
 2 3 -1 843.18 49.66
 -2 3 1 784.97 48.46
 -2 3 1 874.14 49.35
 2 3 -1 899.05 49.31
 2 3 -1 922.49 49.72
 -2 3 0 453.77 25.89
 2 3 0 399.67 25.44
 2 3 0 447.81 27.87
 2 3 0 470.65 26.39
 2 3 0 500.54 26.6
 -2 3 0 418.05 26
 2 3 0 505.54 26.8
 2 3 0 515.98 26.52
 -2 3 0 483.67 26.63
 -2 3 0 460.17 26.16
 -2 3 0 482.54 25.93
 -2 3 -1 355.17 20.96
 2 3 1 328.75 21.91
 2 3 1 358.19 20.4
 2 3 1 368.43 20.77
 -2 3 -1 316.32 20.47
 2 3 1 371.29 20.99
 -2 3 -1 343.76 20.48
 -2 3 -1 330.49 20.43
 2 3 2 17.39 2.16
 2 3 2 22.09 2.68
 -2 3 -2 18.63 2.39
 -2 3 -2 16.85 2.34
 -2 3 -3 23.94 3.04
 -2 3 -3 25.52 3.09
 2 3 3 30.99 3.03
 -2 3 -4 698.64 45.61
 2 3 4 780.27 45.37
 -2 3 -4 853.96 46.72
 -2 3 -4 772.49 45.9
 2 3 4 834.45 46.34
 -2 3 -5 20.27 2.93
 2 3 6 49.34 4.21
 -2 3 -6 48.74 5.05
 2 3 7 257.19 15.24
 2 3 7 226.41 14.82
 -2 3 -7 235.98 15.75
 -2 3 -8 252.45 18.17
 2 3 8 298.86 17.9
 -2 3 -8 315.66 19.25
 2 3 8 268.78 17.49
 2 3 9 60.77 5.42
 -2 3 -9 50.36 6.28
 -2 3 -9 60.95 7.48
 2 3 9 60.79 5.6
 -2 3 -10 113.79 10.59
 2 3 10 117.76 9.15
 -2 3 -10 116.77 11.27
 2 3 10 106.97 8.55
 -2 3 -11 14.46 6.34
 2 3 11 12.23 3.66
 2 3 11 12.11 2.99
 -2 3 -11 11.2 5.84
 -2 3 -12 13.48 7.13
 2 3 12 10.46 3.46
 -2 3 -12 17.58 6
 2 3 12 7.81 3.39
 -2 3 -13 107.04 7.74
 2 3 13 116.52 7.52
 2 3 13 99.05 7.87
 -2 3 -13 91.17 8.98
 -2 3 -13 92.36 7.81
 2 3 13 94.69 7.72
 2 3 13 95.05 7.5
 2 3 14 114.7 7.68
 2 3 14 118.74 7.16
 -2 3 -14 118.48 8.47
 2 3 14 116.84 7.64
 2 3 14 102.78 7.28
 -2 4 15 22.92 2.26
 -2 4 15 25.17 2.26
 -2 4 14 25.34 3.09
 -2 4 14 25.55 3.24
 2 4 -14 21.49 3.3
 -2 4 14 26.68 2.97
 2 4 -14 30.8 4.3
 2 4 -14 29.2 4.26
 -2 4 13 81.88 6.03
 -2 4 13 59.29 5.81
 -2 4 13 61.2 5.38
 2 4 -13 76.4 7.23
 -2 4 13 53.94 5.05
 2 4 -13 63.99 6.28
 -2 4 13 77.54 5.77
 2 4 -12 260.94 17.57
 2 4 -12 310.68 18.84
 -2 4 12 295.95 17.15
 -2 4 12 227.31 16.47
 -2 4 12 271.67 17.42
 -2 4 12 248.83 16.71
 2 4 -12 284.81 17.95
 -2 4 11 14.2 2.8
 -2 4 11 16.28 3.66
 2 4 -11 14.64 4.54
 -2 4 11 14.6 3.09
 2 4 -11 11.33 6.49
 2 4 -11 15.53 5.19
 2 4 -10 148.25 11.64
 2 4 -10 130.23 11.69
 -2 4 10 162.61 10.77
 -2 4 10 167.81 11.5
 -2 4 10 162.97 10.68
 2 4 -9 126.51 10.91
 2 4 -9 154.21 12.27
 -2 4 9 145.97 9.92
 2 4 -9 125.1 10.61
 -2 4 9 135.84 9.63
 2 4 -8 253.34 16.28
 2 4 -8 219.39 15.83
 -2 4 -6 110.75 8.57
 -2 4 -7 186.45 13.06
 2 4 7 172.92 11.62
 -2 4 -7 167.49 12.13
 -2 4 -8 5.2 4.44
 2 4 8 7.42 2.38
 -2 4 -8 9.01 3.3
 -2 4 -9 61.6 7.41
 2 4 9 82.47 6.65
 -2 4 -9 76.32 8.69
 2 4 9 63.19 5.62
 2 4 10 20.87 2.96
 2 4 10 24.6 3.66
 -2 4 -10 21.16 5.79
 -2 4 -10 21.2 4.97
 -2 4 -10 20.98 6.21
 -2 4 -10 22.43 7.66
 2 4 11 336.88 17.32
 -2 4 -11 194.17 16.29
 2 4 11 289.57 16.37
 -2 4 -11 265.75 17.52
 -2 4 -11 192.06 17.63
 -2 4 -11 206.71 16.92
 2 4 11 278.17 16.28
 2 4 12 45.76 4.33
 -2 4 -12 59.23 7.27
 -2 4 -12 48.23 5.81
 2 4 12 46.2 4.75
 -2 4 -12 47.99 5.94
 2 4 12 42.03 4.26
 2 4 13 201.99 12.39
 2 4 13 209.24 12.54
 -2 4 -13 199.54 12.44
 -2 4 -13 174.12 12.47
 -2 4 -13 189.88 13
 2 4 13 196.58 12.49
 2 5 -13 34.86 4.04
 -2 5 13 60.32 3.98
 2 5 -12 8.07 3.58
 -2 5 12 6.85 2.12
 -2 5 12 7.06 1.66
 2 5 -12 8.72 3.31
 -2 5 12 3.26 1.44
 -2 5 11 18.4 2.73
 -2 5 11 16.01 2.52
 2 5 -11 14.85 4.36
 2 5 -10 15.54 5.03
 -2 5 10 25.8 3.13
 -2 5 10 25.05 3.29
 2 5 -9 4.43 4.76
 -2 5 9 10.14 2.52
 2 5 -8 2.05 4.75
 -2 5 8 7.18 2.35
 2 5 -7 57.56 6.81
 -2 5 -6 132.4 10.01
 -2 5 -7 34.49 4.77
 -2 5 -8 133.67 9.99
 -2 5 -8 118.73 10.27
 -2 5 -9 51.68 6
 2 5 9 71.77 5.22
 -2 5 -9 53.07 5.53
 -2 5 -9 75.33 7.01
 -2 5 -9 78.43 8.2
 -2 5 -10 29.75 5.85
 2 5 10 30.22 3.03
 2 5 10 34.38 3.46
 2 5 10 38.97 3.9
 -2 5 -10 29.42 4.65
 -2 5 -10 28.4 4.02
 -2 5 -11 60.73 5.41
 -2 5 -11 66.64 6.13
 2 5 11 63.94 4.59
 2 5 11 72.82 5.03
 2 5 11 78.93 4.85
 2 6 -10 3.32 2.19
 -2 6 9 1.48 1.23
 2 6 -9 2.86 2.07
 2 6 -9 0.8 2.6
 -2 6 8 0.52 1.34
 2 6 -8 1.39 2.34
 -2 6 -6 117.67 8.35
 -2 6 -7 42.21 5.26
 -2 6 -8 19.66 3.73
 -3 -7 5 14.2 1.91
 -3 -7 4 77.95 5.11
 3 -7 -4 63.83 5.2
 3 -7 -3 64.06 5.1
 3 -7 -2 108.84 7.11
 3 -7 -1 34.49 3.26
 3 -7 0 91.61 6.28
 3 -7 1 64.26 4.74
 3 -7 2 58.73 4.38
 3 -7 3 71.39 4.94
 -3 -6 10 30.42 3.39
 3 -6 -10 34.56 3.49
 -3 -6 10 31.98 3.12
 3 -6 -9 14.58 2.65
 3 -6 -9 11.83 3.29
 -3 -6 9 10.82 2.5
 3 -6 -8 118.14 7.8
 -3 -6 8 92.78 8
 3 -6 -8 95.21 8.18
 -3 -6 7 162.41 13.1
 -3 -6 7 166.27 12.79
 3 -6 -7 215.26 12.98
 3 -6 -7 193.62 13.58
 -3 -6 7 214.63 12.03
 -3 -6 6 5.79 2.27
 -3 -6 6 5.43 2.79
 3 -6 -6 6.8 4
 -3 -6 6 2.45 3.5
 3 -6 -6 3.86 2.57
 -3 -6 5 118.21 9.2
 -3 -6 5 110.78 9.47
 3 -6 -5 124 9.98
 3 -6 -5 137.11 9.12
 3 -6 -4 112.88 9.52
 -3 -6 4 109.73 8.75
 -3 -6 4 126.85 9.31
 3 -6 -3 17.69 4.43
 -3 -6 3 19.47 3.56
 -3 -6 3 17.02 3.41
 -3 -6 2 71.2 6.2
 3 -6 -2 77.57 7.45
 -3 -6 2 75.13 6.34
 -3 -6 1 55.45 5.04
 3 -6 -1 66.4 6.57
 -3 -6 1 53.78 5.52
 -3 -6 1 57.31 5.19
 -3 -6 0 183.24 11.66
 3 -6 0 165.92 12.08
 -3 -6 0 173.46 12.42
 3 -6 0 189.26 12.85
 -3 -6 -1 4.33 3.33
 3 -6 1 8.2 3.94
 3 -6 1 -3.61 3.81
 -3 -6 -2 323.07 19.7
 3 -6 2 278.17 19.24
 3 -6 2 306.78 18.9
 3 -6 3 70.08 6.35
 -3 -6 -3 78.12 6.9
 3 -6 3 58.97 6.55
 -3 -6 -4 36.29 4.83
 3 -6 4 38.71 4.5
 3 -6 4 30.68 5.03
 3 -6 5 112.04 9.5
 3 -6 5 124.45 8.48
 -3 -6 -5 111.13 9.01
 -3 -6 -6 126.49 9.24
 3 -6 6 115.84 9.53
 3 -6 6 130.93 8.72
 3 -6 7 97.54 8
 -3 -6 -7 110.22 7.86
 3 -6 8 54.98 4.83
 3 -5 -13 2.24 1.77
 3 -5 -12 35.56 4.27
 -3 -5 12 31.62 3.67
 -3 -5 12 30.78 3.2
 3 -5 -11 20.9 4.24
 -3 -5 11 17.48 3.87
 -3 -5 11 17.12 3.05
 3 -5 -11 20.21 4.03
 3 -5 -10 35.22 4.29
 3 -5 -10 41.9 5.87
 -3 -5 10 33.01 4.56
 -3 -5 10 30.37 5.12
 3 -5 -10 41.99 5.43
 3 -5 -9 6.66 4.04
 3 -5 -9 4.91 3.14
 -3 -5 9 4.02 2.84
 3 -5 -9 3.69 4.32
 -3 -5 9 4.26 3.08
 -3 -5 9 3.75 4.24
 -3 -5 8 270.19 15.09
 -3 -5 8 191.32 15.57
 3 -5 -8 246.56 16.26
 3 -5 -8 231.68 16.76
 3 -5 -8 212.98 15.49
 -3 -5 7 44.55 4.94
 3 -5 -7 40.43 5.19
 3 -5 -7 39.2 5.88
 3 -5 -7 37.19 6.41
 -3 -5 7 34.28 6.57
 -3 -5 6 218.67 16.77
 3 -5 -6 231.11 16.68
 3 -5 -6 244.51 16.28
 -3 -5 6 241.76 15.04
 3 -5 -6 229.93 15.75
 -3 -5 5 8.92 3.28
 3 -5 -5 14.64 3.86
 3 -5 -5 8.7 4.73
 -3 -5 5 5.81 4.49
 3 -5 -5 10.64 3.43
 -3 -5 4 144.86 9.93
 3 -5 -4 141.09 11.68
 3 -5 -4 150.8 10.85
 -3 -5 4 139.13 11.61
 3 -5 -4 160.99 11.17
 -3 -5 3 94.43 6.79
 -3 -5 3 87 8.31
 3 -5 -3 90.31 8.54
 3 -5 -3 94.63 7.63
 3 -5 -3 90.22 7.6
 -3 -5 3 81.1 7.27
 -3 -5 2 271.66 18.15
 3 -5 -2 301.17 19
 -3 -5 2 272.76 18.45
 3 -5 -2 271.91 17.91
 3 -5 -1 68.28 6.37
 -3 -5 1 68.75 6.39
 -3 -5 1 64.35 6.22
 -3 -5 1 65.65 6.65
 3 -5 -1 77.38 7.52
 3 -5 0 11.78 3.53
 3 -5 0 16.01 3.47
 -3 -5 0 13.93 3.02
 -3 -5 0 9.24 2.9
 -3 -5 0 10.42 3.63
 3 -5 0 18.47 4.81
 3 -5 1 43.2 5.6
 3 -5 1 41.61 5.01
 -3 -5 -1 46.58 5.89
 3 -5 1 43.25 6.08
 -3 -5 -1 43.69 4.48
 3 -5 2 348.92 22.29
 -3 -5 -2 346.91 23.21
 3 -5 2 364.42 23.46
 3 -5 2 370.62 23.17
 3 -5 3 35.1 5.98
 -3 -5 -3 30.07 5.59
 3 -5 3 39.38 5.89
 3 -5 3 22.03 4.99
 3 -5 3 33.2 4.65
 3 -5 4 120.05 10.53
 3 -5 4 94.94 8.75
 -3 -5 -4 98.1 9.54
 3 -5 4 119.9 8.69
 3 -5 5 27.1 5.89
 3 -5 5 23.55 3.89
 -3 -5 -5 34.57 4.96
 -3 -5 -5 32.41 6.08
 3 -5 5 31.96 4.54
 -3 -5 -6 349 22.48
 3 -5 6 410.74 21.81
 3 -5 6 358.45 23.52
 3 -5 7 90.44 7.82
 3 -5 7 106.89 8.38
 3 -5 7 99.42 9.6
 -3 -5 -7 93.84 9.02
 -3 -5 -7 95.8 8.55
 3 -5 8 150.64 11.95
 -3 -5 -8 177.27 12.84
 -3 -5 -8 180.95 12.8
 -3 -5 -9 21.72 3.92
 3 -5 9 16.58 3
 3 -5 9 22.3 3.47
 -3 -5 -10 2.57 2.46
 3 -5 10 -0.61 2.61
 3 -5 11 11.86 2.04
 3 -4 -15 3.11 1.75
 3 -4 -14 8.41 2.16
 -3 -4 14 6.32 2.26
 3 -4 -14 10.22 2.85
 3 -4 -13 33.38 4.98
 3 -4 -13 39.42 4.38
 -3 -4 13 36.81 4.51
 -3 -4 13 34.07 4.03
 -3 -4 12 39.64 5.1
 3 -4 -12 54.71 6.08
 3 -4 -12 44.59 6.09
 3 -4 -12 37.05 5.16
 -3 -4 12 49.38 5.66
 3 -4 -11 106.49 9.11
 3 -4 -11 114.77 9.54
 -3 -4 11 96.77 9.08
 3 -4 -11 108.47 9.91
 -3 -4 11 102.31 9.32
 -3 -4 10 87.88 7.13
 -3 -4 10 82.73 8.2
 3 -4 -10 76.41 8.75
 -3 -4 10 70.82 8.13
 3 -4 -10 81.03 8.02
 -3 -4 9 126.12 8.83
 3 -4 -9 111.35 10.3
 -3 -4 9 91.04 9.01
 -3 -4 9 103.03 10.08
 3 -4 -9 119.74 10.11
 3 -4 -9 107.45 9.66
 -3 -4 9 115.02 9.91
 -3 -4 8 49.91 5.25
 -3 -4 8 27.18 6.1
 3 -4 -8 34.98 6.29
 -3 -4 8 39.76 5.6
 -3 -4 8 31.64 5.11
 3 -4 -8 37.97 6.1
 3 -4 -8 34.59 5.57
 -3 -4 7 132.52 10.54
 3 -4 -7 108.21 10.05
 3 -4 -7 150.15 11.23
 -3 -4 7 129.41 11.3
 3 -4 -7 124.68 10.53
 -3 -4 7 139.56 9.79
 3 -4 -7 134.41 10.48
 -3 -4 6 459.93 30.75
 3 -4 -6 524.19 31.19
 3 -4 -6 509.46 30.83
 3 -4 -6 527.61 31
 -3 -4 6 471.86 30.72
 -3 -4 6 512.23 29.7
 3 -4 -6 495.66 30.68
 -3 -4 5 288.83 19.21
 3 -4 -5 311.34 19.4
 3 -4 -5 305.88 19.08
 -3 -4 5 280.23 17.91
 -3 -4 5 291.27 19.66
 3 -4 -5 292.97 18.86
 3 -4 -5 298.28 19.06
 -3 -4 5 277.22 18.85
 3 -4 -4 150.15 11.02
 3 -4 -4 143.13 10.51
 3 -4 -4 148.95 10.73
 -3 -4 4 142.39 11.23
 3 -4 -4 155.32 10.74
 -3 -4 4 141.8 10.87
 -3 -4 4 138.78 10.58
 -3 -4 4 142.15 9.74
 -3 -4 3 104.65 8.66
 -3 -4 3 98.46 8.22
 -3 -4 3 85.17 6.89
 3 -4 -3 93.63 7.68
 3 -4 -3 103.3 7.76
 3 -4 -3 98.31 8.29
 -3 -4 2 233.46 16
 3 -4 -2 287.1 17.21
 -3 -4 2 286.13 17.93
 -3 -4 2 275.19 17.33
 3 -4 -2 267.4 16.8
 3 -4 -2 272.71 17.49
 3 -4 -2 265.13 16.98
 -3 -4 2 272.12 17.49
 3 -4 -1 22.17 4.43
 3 -4 -1 31.48 4.43
 -3 -4 1 26.05 4.21
 -3 -4 1 26.98 3.82
 3 -4 -1 29.99 4.03
 -3 -4 1 29.39 4.11
 3 -4 0 38.87 5.23
 3 -4 0 42.04 5.19
 -3 -4 0 34.28 4.12
 -3 -4 0 41.03 4.91
 3 -4 0 36.2 4.57
 3 -4 0 37.67 4.66
 -3 -4 0 34.97 4.42
 -3 -4 0 38.11 4.92
 -3 -4 -1 93.96 8.24
 -3 -4 -1 92.71 8.05
 -3 -4 -1 89.85 7.13
 -3 -4 -1 101.36 7.7
 3 -4 1 92.81 7.72
 3 -4 1 102.52 8.43
 3 -4 1 95.8 8.08
 -3 -4 -1 89.24 7.24
 3 -4 1 106.25 8.35
 -3 -4 -2 390.82 24.05
 -3 -4 -2 383.08 23.2
 -3 -4 -2 405.77 24.83
 3 -4 2 386.19 24.55
 3 -4 2 390.91 23.79
 -3 -4 -2 383.64 24.48
 -3 -4 -2 365.53 23.42
 3 -4 2 385.01 24.14
 3 -4 3 177.3 12.94
 -3 -4 -3 218.99 14.7
 3 -4 3 208.4 14.49
 -3 -4 -3 205.41 13.9
 3 -4 3 203.43 13.42
 -3 -4 -3 177.53 13.2
 -3 -4 -3 189.39 13.98
 3 -4 3 198.57 13.85
 -3 -4 -4 210.37 14.66
 3 -4 4 208.87 13.83
 3 -4 4 190.46 14.39
 -3 -4 -4 194.95 13.41
 -3 -4 -4 186.29 13.68
 3 -4 4 166.61 12.92
 3 -4 4 179.34 13.02
 -3 -4 -5 357.23 22.32
 -3 -4 -5 341.61 21.97
 3 -4 5 353.91 22.87
 -3 -4 -5 363.7 23.02
 3 -4 5 328.26 21.6
 3 -4 5 293.49 20.86
 3 -4 5 341.93 21.23
 -3 -4 -6 43.77 6.35
 3 -4 6 40.79 5.65
 -3 -4 -6 49.7 6.69
 3 -4 6 41.09 5.64
 -3 -4 -6 39.09 4.8
 3 -4 6 36.64 6.61
 3 -4 6 44 5.4
 -3 -4 -6 37.78 6
 3 -4 7 121.92 8.84
 3 -4 7 98.69 8.11
 3 -4 7 96.94 9.03
 -3 -4 -7 97.21 9.31
 -3 -4 -7 93.4 9.3
 -3 -4 -7 89.74 9.51
 -3 -4 -7 98.6 8.26
 -3 -4 -8 53.53 7.14
 -3 -4 -8 56.83 5.91
 3 -4 8 55.58 6.77
 3 -4 8 67.99 6.51
 -3 -4 -8 57.92 7.47
 -3 -4 -8 57.7 6.94
 3 -4 8 58.26 7.59
 -3 -4 -9 10.82 4.19
 3 -4 9 15.4 4.04
 3 -4 9 9.26 4.04
 3 -4 9 8.45 4.6
 -3 -4 -9 6.51 2.99
 -3 -4 -9 13.72 4.61
 3 -4 10 6.46 3.99
 3 -4 10 2.92 2.89
 3 -4 10 5.83 3.48
 -3 -4 -10 8.75 3.49
 -3 -4 -10 8.83 4.13
 -3 -4 -11 28.68 3.6
 3 -4 11 24.57 3.85
 -3 -4 -11 24.54 4.36
 3 -4 11 24.63 4.27
 3 -4 12 20.38 3.03
 3 -4 12 19.59 2.86
 -3 -4 -12 23 3.47
 -3 -3 16 13.98 2.3
 3 -3 -16 9.69 1.88
 3 -3 -15 6.37 2.66
 -3 -3 15 8.9 2.87
 -3 -3 14 138.63 10.59
 3 -3 -14 123.17 9.78
 3 -3 -14 151.08 10.4
 3 -3 -13 45.39 5.77
 -3 -3 13 41.47 4.75
 3 -3 -13 49.38 6
 3 -3 -13 55.35 6.45
 3 -3 -13 45.61 6.86
 -3 -3 13 44.64 5.39
 -3 -3 13 54.37 6.36
 3 -3 -13 49.98 5.71
 3 -3 -12 105.96 10.86
 -3 -3 12 106.18 10.21
 3 -3 -12 126.5 10.52
 -3 -3 12 114.77 9.79
 3 -3 -12 147.27 10.51
 -3 -3 12 114.31 9.53
 3 -3 -12 135.07 10.47
 3 -3 -12 121.3 10.37
 -3 -3 12 113.87 9.68
 -3 -3 11 204.13 14.91
 -3 -3 11 191.78 15.26
 -3 -3 11 189.64 14.78
 -3 -3 11 202.57 15.22
 3 -3 -11 221.07 15.85
 -3 -3 11 221.26 15.86
 3 -3 -11 218.29 15.89
 3 -3 -11 257.65 15.77
 3 -3 -11 210.42 15.47
 3 -3 -11 231.32 15.54
 3 -3 -10 105.21 9.88
 3 -3 -10 109.37 10.05
 -3 -3 10 93.02 9.31
 3 -3 -10 111.36 9.55
 -3 -3 10 93.11 8.75
 -3 -3 10 108.54 9.67
 3 -3 -10 101.59 9.47
 -3 -3 10 100.29 9.08
 3 -3 -10 114.35 9.58
 -3 -3 10 92.57 9.02
 -3 -3 10 113.33 8.44
 3 -3 -9 331.07 22.99
 -3 -3 9 351.13 23.04
 -3 -3 9 328.3 22.84
 3 -3 -9 371.65 23.49
 -3 -3 9 319.44 22.45
 3 -3 -9 367.32 23.19
 -3 -3 9 368.77 23.35
 -3 -3 9 434.43 22.07
 -3 -3 9 278.82 22.86
 3 -3 -9 370.29 23.03
 -3 -3 8 15.79 3.74
 3 -3 -8 10.98 4.28
 3 -3 -8 12.11 4.23
 -3 -3 8 17.56 4.52
 3 -3 -8 16.57 4.21
 -3 -3 8 12.66 3.98
 -3 -3 8 14.32 4.07
 3 -3 -8 10.7 4.55
 -3 -3 8 18.44 4.32
 -3 -3 7 164.75 10.25
 3 -3 -7 144.2 10.92
 3 -3 -7 141.54 11.07
 3 -3 -7 143.24 11.2
 -3 -3 7 154.08 11.43
 -3 -3 7 124.29 10.41
 -3 -3 7 149.17 11.41
 -3 -3 7 145.7 10.96
 3 -3 -7 154.15 10.9
 3 -3 -6 194.25 13.53
 3 -3 -6 210.81 13.87
 -3 -3 6 196.39 13.96
 -3 -3 6 202.72 12.68
 3 -3 -6 205.11 13.56
 -3 -3 6 192.5 13.53
 -3 -3 6 215.2 14.11
 -3 -3 6 188.14 13.27
 3 -3 -5 505.84 28.28
 3 -3 -5 463.45 27.99
 -3 -3 5 460.46 27.92
 -3 -3 5 453.93 28.22
 -3 -3 5 417.94 27.47
 3 -3 -5 476 27.38
 3 -3 -5 473.64 28
 3 -3 -5 462.21 27.74
 3 -3 -5 473.64 27.85
 -3 -3 5 443.28 26.92
 3 -3 -4 49.63 5.09
 3 -3 -4 56.87 5.33
 -3 -3 4 49.92 4.75
 3 -3 -4 52.47 4.62
 -3 -3 4 49.52 5.28
 -3 -3 4 58.24 5.17
 -3 -3 4 56.63 5.68
 3 -3 -4 50.83 4.98
 3 -3 -4 58.32 5.33
 -3 -3 4 50.48 4.33
 3 -3 -4 51.79 4.93
 3 -3 -3 307.23 19.9
 -3 -3 3 334.64 20.08
 -3 -3 3 289.53 18.96
 -3 -3 3 349.46 20.39
 -3 -3 3 349.67 20.46
 3 -3 -3 315.52 19.52
 3 -3 -3 343.01 19.89
 3 -3 -3 307.87 19.69
 3 -3 -3 344.4 20.06
 3 -3 -3 348.41 19.79
 -3 -3 3 314.99 19.81
 -3 -3 2 163.07 10.78
 3 -3 -2 146.92 10.48
 -3 -3 2 145.49 10.45
 3 -3 -2 160.54 10.58
 3 -3 -2 148.22 10.09
 3 -3 -2 159.55 10.2
 3 -3 -2 151.44 10.66
 3 -3 -2 145.37 10.31
 -3 -3 2 166.68 10.7
 3 -3 -2 150.96 10.31
 -3 -3 2 165.57 11.05
 -3 -3 1 77.13 6.5
 3 -3 -1 77.46 6.65
 -3 -3 1 84.68 6.84
 -3 -3 1 90.93 7.22
 -3 -3 1 89.31 6.73
 3 -3 -1 81.09 6.4
 3 -3 -1 82.26 6.65
 3 -3 -1 97.44 7.16
 3 -3 -1 96.02 6.61
 3 -3 -1 88.52 6.61
 -3 -3 0 15.84 3.3
 -3 -3 0 18.31 3.57
 3 -3 0 15.49 3.01
 3 -3 0 16.59 3.15
 3 -3 0 16.45 3.05
 3 -3 0 12.3 2.64
 -3 -3 0 16.33 2.81
 -3 -3 0 15.53 2.96
 -3 -3 0 16.13 3.12
 3 -3 0 15.77 2.74
 3 -3 0 14.97 3.21
 3 -3 1 556.8 32.53
 -3 -3 -1 563.93 32.7
 -3 -3 -1 542.61 32.71
 -3 -3 -1 563.18 32.2
 3 -3 1 604.25 33.45
 3 -3 1 566.09 32.45
 -3 -3 -1 521.72 31.83
 3 -3 1 536.3 32.21
 -3 -3 -1 522.6 31.68
 3 -3 1 514.19 32
 -3 -3 -1 545.8 32.63
 -3 -3 -2 102.75 6.96
 -3 -3 -2 104.94 8.33
 3 -3 2 112.12 8.22
 -3 -3 -2 100.84 7.02
 3 -3 2 119.31 9.07
 3 -3 2 110 8.28
 -3 -3 -2 84.85 7.86
 3 -3 2 95.51 7.9
 -3 -3 -2 108.01 7.5
 3 -3 2 93.9 7.2
 -3 -3 -2 98.29 7.74
 3 -3 2 96.91 7.56
 3 -3 2 98.62 7.83
 3 -3 3 395.62 25.42
 3 -3 3 398.51 24.11
 3 -3 3 363.25 23.37
 3 -3 3 393.01 24.03
 -3 -3 -3 393.52 23.63
 3 -3 3 391.66 24.14
 -3 -3 -3 399.16 24.35
 3 -3 3 388.26 23.56
 3 -3 3 369.4 23.33
 -3 -3 -3 380.26 23.84
 -3 -3 -4 261.45 16.72
 3 -3 4 278.54 17
 -3 -3 -4 256.52 16.75
 -3 -3 -4 262.85 16.58
 3 -3 4 256.35 16.07
 3 -3 4 200.74 15.45
 3 -3 4 249.12 16.19
 3 -3 4 272.42 16.47
 -3 -3 -5 419.14 27.05
 -3 -3 -5 478.21 27.37
 3 -3 5 399.32 26.06
 -3 -3 -5 451.23 27.38
 3 -3 5 436.22 26.96
 3 -3 5 458.46 26.59
 -3 -3 -6 135.76 11.16
 3 -3 6 124.01 9.98
 -3 -3 -6 124.35 10.18
 -3 -3 -6 128.57 10.55
 3 -3 6 138.44 10.84
 -3 -3 -6 126.76 10.37
 3 -3 6 129.43 9.64
 3 -3 6 125.3 9.25
 3 -3 7 158.49 12.14
 -3 -3 -7 166.99 11.87
 -3 -3 -7 168.4 13.27
 3 -3 7 182.19 11.88
 -3 -3 -7 164.7 12.76
 3 -3 7 145.9 10.98
 3 -3 7 154.14 12.51
 -3 -3 -7 158.13 12.2
 -3 -3 -8 3.53 4.47
 3 -3 8 3.25 2.83
 3 -3 8 8.19 4
 3 -3 8 8.58 4.17
 -3 -3 -8 6.73 3.97
 3 -3 8 7.56 4.32
 3 -3 8 9.65 4.55
 -3 -3 -8 1.8 3.7
 -3 -3 -9 159.78 11.46
 3 -3 9 133.6 11.8
 3 -3 9 170.15 10.61
 3 -3 9 128.14 10.88
 -3 -3 -9 145.53 12.21
 -3 -3 -9 142.33 12.03
 -3 -3 -9 146.54 11.1
 3 -3 9 128.13 11.31
 -3 -3 -10 90.67 9.3
 -3 -3 -10 95.89 8.44
 3 -3 10 89.13 9.04
 -3 -3 -10 104.14 9.52
 3 -3 10 81.85 7.99
 -3 -3 -10 100.85 8.23
 3 -3 10 113.81 7.77
 3 -3 10 99.23 9.16
 3 -3 11 14.76 4.24
 -3 -3 -11 6.45 4.4
 -3 -3 -11 16.4 3.23
 3 -3 11 9.81 3.05
 -3 -3 -11 9.24 3.51
 3 -3 12 18.31 3.68
 3 -3 12 20.75 4.09
 -3 -3 -12 20.67 4.14
 -3 -3 -12 13.8 3.28
 3 -3 12 14.31 2.78
 -3 -3 -13 4.36 1.96
 3 -3 13 10.34 2.81
 -3 -3 -13 5.12 2.85
 3 -3 14 4.08 1.42
 -3 -3 -14 5.73 2.07
 3 -2 -17 6.3 1.9
 -3 -2 17 14.58 2.33
 -3 -2 16 57.03 5.17
 3 -2 -16 57.64 5.45
 -3 -2 16 68.39 5.98
 3 -2 -16 58.92 5.59
 3 -2 -15 88.43 8.32
 -3 -2 15 86.86 7.7
 3 -2 -15 101.25 7.57
 -3 -2 15 101.7 8.58
 -3 -2 14 16.73 3.35
 -3 -2 14 18.64 4.33
 -3 -2 14 20.45 4.99
 3 -2 -14 20.26 5.08
 3 -2 -14 24.38 4.4
 -3 -2 14 20.74 4.24
 -3 -2 13 56.78 6.84
 3 -2 -13 65.86 7.73
 -3 -2 13 57.78 7.1
 -3 -2 13 58.38 7.37
 3 -2 -13 78.52 7.22
 -3 -2 13 54.25 6.07
 3 -2 -12 110.26 10.11
 -3 -2 12 99.9 9.59
 -3 -2 12 109.51 9.85
 3 -2 -12 111.56 8.95
 -3 -2 12 95.71 9.07
 3 -2 -12 105.79 9.16
 -3 -2 12 89.5 8.43
 -3 -2 11 147.9 11.28
 3 -2 -11 161.75 12.85
 -3 -2 11 160.92 12.52
 3 -2 -11 174.38 12.13
 -3 -2 11 149.42 11.61
 3 -2 -11 159.89 12.12
 -3 -2 11 157.51 12.93
 -3 -2 11 161.09 12.3
 3 -2 -10 395.54 25.38
 -3 -2 10 366.26 24.38
 -3 -2 10 382.9 24.94
 -3 -2 10 431.11 25.43
 -3 -2 10 364.54 24.22
 3 -2 -10 407.88 24.88
 3 -2 -10 409.03 24.62
 3 -2 -9 99.65 8.66
 -3 -2 9 99.84 8.72
 -3 -2 9 104.49 9
 3 -2 -9 115.45 9.49
 3 -2 -9 111.96 8.72
 -3 -2 9 103.45 8.48
 3 -2 -9 106.36 8.71
 -3 -2 9 126.76 8.22
 -3 -2 9 98.28 8.34
 3 -2 -8 636.18 39.38
 -3 -2 8 641.41 39.28
 -3 -2 8 641.31 39.49
 -3 -2 8 663.3 39.26
 3 -2 -8 555.51 38.73
 3 -2 -8 660.34 39.38
 3 -2 -8 666.86 39.25
 -3 -2 8 691.55 39.77
 3 -2 -8 648.77 39.72
 3 -2 -7 375.48 23.13
 3 -2 -7 381.75 23.51
 3 -2 -7 363.8 23.43
 -3 -2 7 371.97 23.52
 -3 -2 7 361.26 23.42
 3 -2 -7 367.69 23.69
 -3 -2 7 406.98 24.29
 -3 -2 7 419.66 22.7
 -3 -2 7 368.86 23.26
 3 -2 -7 380.11 23.47
 3 -2 -7 393.38 23.82
 -3 -2 7 382.5 23.52
 -3 -2 6 783.95 53.49
 3 -2 -6 933.8 52.12
 -3 -2 6 932.22 51.15
 -3 -2 6 924.63 52.58
 -3 -2 6 885.07 52.05
 3 -2 -6 762.12 51.57
 3 -2 -6 980 52.28
 -3 -2 6 916.17 52.08
 3 -2 -6 896.74 51.96
 3 -2 -6 868.88 52.11
 3 -2 -6 920.98 52.01
 -3 -2 6 985.01 52.64
 3 -2 -6 944.5 51.65
 -3 -2 6 831.98 51.81
 -3 -2 6 886.52 51.78
 -3 -2 5 411.02 22.12
 -3 -2 5 372.97 21.79
 -3 -2 5 366.07 20.84
 3 -2 -5 317.88 20.29
 3 -2 -5 366.85 21.83
 -3 -2 5 338.65 21.46
 -3 -2 5 365.35 21.66
 3 -2 -5 383.11 21.73
 3 -2 -5 363.43 21.49
 3 -2 -5 415.48 21.78
 3 -2 -5 365.18 21.64
 -3 -2 4 373.39 21.93
 3 -2 -4 355.33 21.54
 3 -2 -3 373.92 22.02
 -3 -2 3 381.94 22.43
 3 -2 -2 9.41 2.24
 3 -2 -2 9.55 1.23
 -3 -2 2 6.84 1.61
 -3 -2 1 1814.54 83.59
 -3 -2 1 1825.24 84.05
 3 -2 -1 1878.28 84.67
 3 -2 0 1346.27 76.07
 3 -2 0 1204.14 75.19
 3 -2 0 1398.72 76.38
 -3 -2 0 1329.58 75.42
 -3 -2 0 1404.14 75.03
 -3 -2 -1 570.81 34.12
 3 -2 1 618.25 35.9
 3 -2 1 637.89 35.76
 -3 -2 -1 603.19 34.59
 3 -2 1 617.82 35.02
 3 -2 1 604.64 35.11
 3 -2 2 207.6 13.94
 -3 -2 -2 214.53 13.43
 3 -2 2 231.19 14.44
 3 -2 2 233.34 14.9
 3 -2 2 223.26 15.01
 -3 -2 -3 38.68 4.22
 -3 -2 -3 36.49 4.35
 3 -2 3 40.43 3.82
 3 -2 3 42.62 4.93
 -3 -2 -3 41.99 4.25
 3 -2 3 37.29 3.78
 3 -2 3 37.66 2.66
 -3 -2 -3 40.24 3.14
 3 -2 3 37.16 3.83
 -3 -2 -3 35.12 4.08
 3 -2 3 32.74 3.61
 3 -2 3 42.91 4.61
 3 -2 3 31.05 4.17
 3 -2 4 695.51 40.56
 -3 -2 -4 666.9 38.94
 3 -2 4 641.4 39.02
 3 -2 4 751.12 37.88
 3 -2 4 730.23 40.28
 3 -2 4 524.78 37.75
 -3 -2 -4 706.97 39.36
 3 -2 4 698.44 38.99
 -3 -2 -4 664.85 38.78
 -3 -2 -4 674.06 38.74
 3 -2 4 686.49 38.62
 -3 -2 -4 696.39 38.1
 3 -2 4 580.27 38.1
 3 -2 5 36.14 4.16
 -3 -2 -5 39.17 5.03
 3 -2 5 35.7 4.11
 -3 -2 -5 39.89 4.76
 3 -2 5 36.21 4.41
 -3 -2 -5 34.16 4.11
 3 -2 5 27.99 3.7
 -3 -2 -5 46.35 3.91
 3 -2 5 35.3 5.23
 3 -2 5 43 4.85
 3 -2 5 34.12 4.92
 -3 -2 -6 105.91 8.59
 3 -2 6 103.58 8.26
 -3 -2 -6 94.81 8.3
 3 -2 6 96.18 7
 -3 -2 -6 94.4 7.58
 3 -2 6 91.6 7.81
 -3 -2 -6 90.22 8.15
 -3 -2 -7 33.9 5.02
 -3 -2 -7 30.73 5.4
 3 -2 7 29.59 4.38
 -3 -2 -7 34.57 5.41
 -3 -2 -7 29.62 4.35
 3 -2 7 36.6 4.42
 3 -2 7 31.98 4.83
 -3 -2 -8 182.79 13.89
 3 -2 8 197.11 12.21
 -3 -2 -8 170.82 12.69
 -3 -2 -8 184.93 13.69
 3 -2 8 180.45 13.47
 3 -2 9 71.68 7.73
 -3 -2 -9 80.02 7.14
 3 -2 9 81.84 8.15
 3 -2 9 95.06 6.92
 -3 -2 -9 83.72 8.63
 -3 -2 -10 362.68 23.46
 3 -2 10 370.72 23.2
 3 -2 10 347.37 22.77
 -3 -2 -10 329.91 21.7
 3 -2 10 358.1 23.12
 -3 -2 -10 353.73 23.51
 -3 -2 -11 43.52 6
 -3 -2 -11 45.61 6.12
 3 -2 11 38.19 5.31
 -3 -2 -11 36.89 6.5
 3 -2 11 37.73 5.79
 3 -2 11 35.22 5.27
 -3 -2 -12 30.51 4.89
 3 -2 12 34.49 5.36
 -3 -2 -12 37.6 5.48
 3 -2 12 32.82 4.77
 3 -2 12 29.18 4.22
 -3 -2 -12 36.62 6.09
 3 -2 13 14.09 3.37
 3 -2 13 22.7 3.94
 -3 -2 -13 22.68 3.66
 -3 -2 -13 16.59 4.27
 -3 -2 -13 20.84 4.12
 -3 -2 -14 3.44 2.42
 3 -2 14 3.88 2.04
 -3 -2 -14 3.93 2.68
 3 -2 14 4.6 2.23
 3 -1 -17 1.63 2.71
 -3 -1 17 3.54 2.27
 -3 -1 17 3.61 2.17
 3 -1 -17 3.41 2.72
 -3 -1 16 14.34 3.53
 -3 -1 16 15.93 3.85
 3 -1 -16 11.72 4.33
 -3 -1 16 13.24 3.37
 3 -1 -16 14.18 4.44
 3 -1 -15 29.04 6.19
 3 -1 -15 27.62 5.92
 -3 -1 15 22.19 4.55
 -3 -1 15 26.77 5
 3 -1 -14 87.3 9.21
 -3 -1 14 75.83 7.97
 -3 -1 14 63.37 6.06
 3 -1 -14 77.92 6.69
 3 -1 -14 97.84 9.27
 -3 -1 14 94.09 8.66
 -3 -1 13 28.2 5.61
 3 -1 -13 22.69 6.65
 3 -1 -13 20.82 3.88
 3 -1 -13 34.3 6.73
 -3 -1 13 37.63 5.47
 3 -1 -13 28.36 4.33
 -3 -1 13 26.1 3.81
 3 -1 -12 704.98 39.31
 -3 -1 12 621.66 39.53
 -3 -1 12 711.98 40.16
 -3 -1 12 774.14 40.78
 -3 -1 12 621.28 38.77
 3 -1 -12 714.84 40.86
 3 -1 -12 634.91 38.65
 -3 -1 12 576.42 38.33
 3 -1 -11 113.57 8.66
 3 -1 -11 109.82 10.66
 -3 -1 11 104.21 9.16
 3 -1 -11 109.57 8.85
 -3 -1 11 131.89 10.01
 -3 -1 11 103.14 8.1
 -3 -1 11 114.11 9.29
 3 -1 -11 115.73 8.56
 -3 -1 11 107.59 8.49
 -3 -1 10 139.14 9.82
 -3 -1 10 127.23 9.43
 -3 -1 10 105.21 8.25
 -3 -1 10 113.93 9.27
 3 -1 -10 113.21 8.59
 -3 -1 10 106.01 8.25
 3 -1 -10 122.98 8.8
 -3 -1 10 105.4 8.53
 3 -1 -10 115.71 8.98
 3 -1 -10 129.74 8.87
 3 -1 -10 124.02 10.48
 3 -1 -9 496.78 30.39
 -3 -1 9 485.53 30.15
 3 -1 -9 524.24 31.48
 3 -1 -9 498.44 30.35
 -3 -1 9 511.53 30.9
 -3 -1 9 487.72 30.12
 -3 -1 9 512.4 30.49
 3 -1 -9 490.99 31.39
 -3 -1 9 479.62 30.85
 3 -1 -9 570.01 30.64
 -3 -1 9 575.1 31.33
 3 -1 -9 530.86 30.68
 -3 -1 8 33.34 4.15
 -3 -1 8 32.57 3.88
 3 -1 -8 35.8 3.26
 -3 -1 8 25.85 3.74
 3 -1 -8 31.58 3.23
 3 -1 -8 35.02 4.08
 -3 -1 8 34.81 3.45
 3 -1 -8 31.82 3.76
 3 -1 -8 31.53 4.96
 -3 -1 8 29.09 4.8
 3 -1 -8 32.73 3.92
 -3 -1 8 28.95 3.61
 3 -1 -8 32.86 3.75
 -3 -1 8 27.6 3.18
 3 -1 -8 32.25 3.87
 3 -1 -8 28.69 3.61
 3 -1 -8 30.66 3.95
 3 -1 -8 36.46 3.78
 3 -1 -7 436.84 26.02
 3 -1 -7 445.61 25.84
 3 -1 -7 422.07 26.51
 3 -1 -7 418.16 26.45
 3 -1 -7 426.66 26.4
 -3 -1 7 384.4 26.02
 -3 -1 7 395.65 25.58
 -3 -1 7 424.92 27.76
 -3 -1 7 557.05 25.6
 -3 -1 7 414.3 25.84
 3 -1 -7 473.81 26.31
 -3 -1 7 399.34 26.04
 -3 -1 7 482.07 27.07
 3 -1 -7 397.36 25.78
 3 -1 -7 468.19 25.76
 3 -1 -7 411.32 25.73
 -3 -1 7 472.44 26.43
 3 -1 -6 1142.42 70.94
 3 -1 -6 1261.96 70.25
 -3 -1 6 1250.26 72.27
 3 -1 -6 1215.92 71.02
 3 -1 -6 1167.62 70.31
 3 -1 -6 1306.95 70.84
 -3 -1 6 1271.58 71.19
 3 -1 -6 1281.9 71.16
 -3 -1 6 1322.9 71.48
 -3 -1 5 390.37 23.58
 3 -1 -5 402.99 21.76
 3 -1 -5 343.95 21.83
 3 -1 -5 379.33 22.52
 3 -1 -5 369.63 22.27
 -3 -1 5 376.66 22.51
 -3 -1 5 374.77 22.78
 3 -1 -4 626.63 32.21
 3 -1 -4 566.78 32.89
 -3 -1 4 551.63 32.9
 -3 -1 4 596.01 33.27
 3 -1 -4 577.88 33
 3 -1 -4 544.6 31.91
 -3 -1 4 560.98 33.88
 3 -1 -3 714.33 38.26
 3 -1 -3 658.81 38.87
 -3 -1 3 687.91 39.3
 3 -1 -3 670.52 38.68
 -3 -1 3 638.1 38.96
 -3 -1 3 701.89 39.35
 3 -1 -3 626.02 39.08
 3 -1 -3 647.53 39.04
 -3 -1 2 664.8 36.63
 -3 -1 2 687.04 36.66
 -3 -1 2 586.44 36.15
 3 -1 -2 649.5 36.42
 3 -1 -2 609.59 36.35
 3 -1 -2 663.68 36.28
 -3 -1 1 2089.26 114.85
 -3 -1 1 2089.94 114.16
 3 -1 -1 1952.77 114.69
 -3 -1 1 1951.01 114.72
 3 -1 -1 2037.15 114.24
 3 -1 0 105.88 6.3
 -3 -1 0 108.51 6.64
 3 -1 1 1754.89 99.46
 -3 -1 -1 1742.64 99.76
 -3 -1 -1 1795.27 99.5
 -3 -1 -1 1843.71 99.52
 3 -1 1 1628.74 100.48
 3 -1 2 578.91 34.79
 -3 -1 -2 635.66 35.14
 -3 -1 -2 638.17 35.36
 -3 -1 -2 614.79 34.83
 -3 -1 -2 599.99 34.98
 -3 -1 -3 314.04 18.49
 3 -1 3 292.26 19.75
 -3 -1 -3 329.11 19.06
 -3 -1 -3 343.17 18.79
 -3 -1 -3 328.93 18.75
 3 -1 3 292.01 18.44
 -3 -1 -3 289.61 18.74
 3 -1 4 138.31 9.15
 -3 -1 -4 127.86 9.51
 -3 -1 -4 146.96 9.66
 -3 -1 -4 142.25 9.3
 -3 -1 -4 140.95 9.27
 -3 -1 -5 94.17 7.2
 3 -1 5 84.6 6.47
 -3 -1 -5 105.61 7.62
 3 -1 5 90.7 7.07
 -3 -1 -5 97.84 7.5
 3 -1 5 99.02 6.83
 3 -1 5 97.69 6.86
 -3 -1 -5 98.64 7.64
 -3 -1 -5 99.64 7.15
 3 -1 5 95.37 7.01
 3 -1 5 109.83 8.79
 -3 -1 -5 82.26 7.17
 3 -1 5 104.62 6.92
 -3 -1 -5 104.33 7.17
 3 -1 6 379.4 22.48
 3 -1 6 402.87 24.79
 -3 -1 -6 341.79 22.18
 3 -1 6 342.19 21.74
 3 -1 6 385.26 22.67
 -3 -1 -6 378.67 23.36
 3 -1 6 321.71 21.7
 3 -1 6 372.66 21.47
 3 -1 6 355.48 22.15
 3 -1 6 410.02 22.1
 -3 -1 -6 374.09 22.86
 -3 -1 -6 376.82 22.88
 -3 -1 -6 384.1 23.17
 -3 -1 -6 377.21 22.58
 -3 -1 -6 359.95 21.99
 3 -1 6 365.87 24.03
 -3 -1 -6 366.42 22.55
 -3 -1 -6 374.15 22.71
 3 -1 7 40.82 3.59
 -3 -1 -7 29.81 4.08
 -3 -1 -7 30.4 4.95
 3 -1 7 28.52 3.93
 3 -1 7 29.58 3.35
 3 -1 7 32.07 4.15
 -3 -1 -7 27.43 3.79
 -3 -1 -7 31.9 4.24
 -3 -1 -7 42.48 4.6
 3 -1 8 444.87 22.67
 -3 -1 -8 361.41 23.69
 -3 -1 -8 373.01 23.71
 -3 -1 -8 376.61 24.17
 3 -1 8 334.99 22.92
 3 -1 8 365.45 23.75
 3 -1 8 401.05 23.99
 -3 -1 -8 354.69 24.19
 -3 -1 -9 87.18 8.17
 3 -1 9 87.04 7.74
 -3 -1 -9 94.32 8.55
 -3 -1 -9 92.18 9.12
 3 -1 9 97.63 8.35
 3 -1 9 88.31 7.2
 -3 -1 -10 222.61 15.12
 -3 -1 -10 211.73 15.59
 -3 -1 -10 220.1 14.9
 3 -1 10 217.33 14.87
 3 -1 10 175.39 13.65
 3 -1 10 214.34 14.39
 -3 -1 -11 39.22 5.67
 -3 -1 -11 37.37 5.39
 -3 -1 -11 38.95 6.56
 3 -1 11 33.78 4.43
 3 -1 11 35.01 5.42
 -3 -1 -12 83.5 7.38
 -3 -1 -12 83.09 7.64
 3 -1 12 72.66 6.83
 -3 -1 -12 87.36 8.63
 3 -1 12 88.18 7.84
 -3 -1 -13 47.51 5.9
 3 -1 13 45.16 4.77
 3 -1 13 54.64 6.05
 3 -1 13 51.8 5.55
 -3 -1 -14 47.11 5.32
 3 -1 14 43.9 4.96
 3 -1 14 37.93 4.13
 -3 -1 -14 46.55 4.91
 -3 -1 -15 9.48 1.93
 -3 -1 -15 8.67 2.61
 3 -1 15 8.28 2.25
 3 0 -17 174.73 11.11
 3 0 -17 138.62 11.29
 -3 0 17 165.73 11.33
 -3 0 17 174.77 11.35
 -3 0 17 156.7 10.9
 3 0 -16 52.61 6.94
 -3 0 16 48.81 5.8
 -3 0 16 52.02 5.61
 3 0 -16 50.05 6.04
 3 0 -15 4.56 4.7
 -3 0 15 0.62 4.01
 -3 0 15 0.87 2.09
 3 0 -15 -0.86 2.82
 -3 0 15 2.43 3.49
 3 0 -15 -0.24 6.26
 -3 0 15 1.36 3.3
 -3 0 14 78.74 7.97
 3 0 -14 97.98 10.5
 -3 0 14 78.22 6.69
 -3 0 14 97.62 8.69
 3 0 -14 82.77 7.18
 -3 0 14 64.55 6.21
 -3 0 14 81.74 8.33
 -3 0 13 24.04 3.72
 -3 0 13 21.52 3.51
 -3 0 13 27.82 5.2
 -3 0 13 27.41 4.99
 3 0 -13 28.88 5.04
 3 0 -13 28.17 7.79
 -3 0 12 219.45 14.25
 -3 0 12 205.47 15.19
 3 0 -12 197.06 14.65
 3 0 -12 213.22 14.83
 3 0 -12 245.5 17.18
 -3 0 12 220.78 14.37
 -3 0 11 52.85 5.98
 3 0 -11 62.02 8.39
 -3 0 11 48.58 4.83
 3 0 -11 48.66 6.07
 3 0 -11 48.27 6.09
 -3 0 11 50.35 4.89
 3 0 -10 1.93 4.1
 -3 0 10 2.46 2.4
 -3 0 10 1.44 2
 3 0 -10 5.29 3.82
 -3 0 10 1.25 2.02
 -3 0 10 5.65 3.02
 -3 0 9 245.15 16.19
 3 0 -9 244.47 16.22
 3 0 -9 239.55 15.93
 3 0 -9 255.32 17.62
 -3 0 9 278.44 15.79
 -3 0 9 245.95 17.64
 3 0 -9 227.13 16.27
 3 0 -9 255.58 16.04
 -3 0 9 258.55 15.67
 3 0 -8 849.7 49.55
 3 0 -8 827.05 50.15
 3 0 -8 832.03 50.79
 -3 0 8 957.79 49.56
 -3 0 8 903.67 50.73
 -3 0 8 809.15 49.72
 -3 0 8 807.65 49.77
 3 0 -8 824.43 51.19
 3 0 -8 851.61 49.61
 3 0 -8 905.21 50.85
 -3 0 8 895.66 51.08
 3 0 -8 811.19 49.97
 -3 0 8 876.4 51.38
 -3 0 8 896.44 49.47
 3 0 -7 2528.03 154.9
 -3 0 7 2888.45 154.5
 3 0 -7 2662.53 156.02
 3 0 -7 2757.05 155.16
 3 0 -7 2745.09 155.77
 3 0 -7 2558.63 155.06
 -3 0 7 3031.24 155.7
 -3 0 7 2631.84 154.68
 -3 0 7 2876.18 155.93
 -3 0 7 2884.51 156.2
 3 0 -7 2718.83 154.55
 3 0 -7 2809 155.61
 -3 0 7 2617 154.75
 3 0 -7 2881.54 154.62
 -3 0 6 500.41 29.78
 -3 0 6 515.66 29.36
 3 0 -6 474.36 28.95
 -3 0 6 488.47 29.59
 3 0 -6 489.65 29.49
 3 0 -6 487.98 29.86
 -3 0 5 5.95 2.26
 3 0 -5 0.1 2.04
 3 0 -5 3.06 1.57
 -3 0 5 2.28 1.94
 -3 0 5 2.25 2.25
 3 0 -4 629.33 34.95
 3 0 -4 616.48 35.25
 -3 0 4 615.33 35.34
 -3 0 4 594.76 35.14
 3 0 -4 572.6 35.11
 3 0 -3 3101.8 173.32
 -3 0 3 3320.23 173.08
 3 0 -3 2869.91 173.33
 3 0 -3 3012.66 173.07
 3 0 -3 3076.14 173.29
 -3 0 2 3437.96 188.64
 3 0 -2 3313.63 188.43
 -3 0 1 513.13 29.36
 -3 0 1 479 29.09
 3 0 -1 518.11 29.12
 -3 0 1 533.2 29.2
 3 0 -1 518.11 29.4
 3 0 0 2745.11 151.46
 -3 0 0 2843.89 151.78
 -3 0 0 2424.21 151.45
 -3 0 0 2846.99 151.49
 3 0 1 265.71 15.6
 3 0 1 258.42 15.48
 -3 0 -1 278.48 15.87
 3 0 1 253.59 15.51
 3 0 2 717.07 41.76
 3 0 2 738.47 41.72
 -3 0 -2 718.41 41.98
 -3 0 -2 732.1 42.13
 3 0 2 737.98 42.19
 3 0 3 1229.98 66.91
 3 0 3 1134.57 66.3
 3 0 3 1167.31 66.35
 -3 0 -3 1127.74 66.55
 -3 0 -3 1218.03 66.9
 -3 0 -3 1139.44 66.32
 -3 0 -4 939.24 54.61
 -3 0 -4 966.96 54.93
 -3 0 -4 923.79 54.28
 3 0 4 951.44 55.08
 -3 0 -5 3118 157.83
 -3 0 -5 2662.01 157.73
 -3 0 -5 2711.5 158.74
 -3 0 -5 2831.92 157.77
 3 0 5 2835.45 157.36
 -3 0 -5 2706.96 158.54
 3 0 5 2826.07 159.08
 -3 0 -5 2704.42 158.14
 -3 0 -5 2658.25 158.23
 -3 0 -5 2784.78 157.57
 3 0 5 2844.27 158.26
 3 0 5 2921.92 157.33
 3 0 5 2641.54 157.7
 -3 0 -6 374.46 22.24
 3 0 6 394.11 22.92
 -3 0 -6 344.92 23.13
 -3 0 -6 363.79 23.27
 3 0 6 358.54 23.44
 -3 0 -6 381.76 22.28
 -3 0 -6 352.85 22.7
 3 0 6 367.14 21.69
 -3 0 -6 367.87 22.3
 -3 0 -6 366.01 22.64
 -3 0 -6 337.44 21.87
 3 0 6 332.32 22.07
 3 0 6 373.23 21.63
 -3 0 -6 351.13 22.24
 -3 0 -7 590.45 35.93
 3 0 7 630.24 37.69
 -3 0 -7 720.91 36.39
 3 0 7 599.94 35.21
 -3 0 -7 613.51 35.98
 -3 0 -7 504.19 35.6
 -3 0 -7 572.89 35.93
 -3 0 -7 627.84 35.71
 -3 0 -8 1439.86 97.35
 -3 0 -8 1583.6 97.8
 -3 0 -8 1691.78 97.39
 3 0 8 1902.31 97.51
 -3 0 -8 1873.46 97.86
 3 0 8 1721.89 96.84
 3 0 8 1946.42 97.09
 3 0 8 1626.58 97.15
 3 0 8 1791.44 96.62
 -3 0 -8 1583.95 97.34
 -3 0 -8 1520.93 97
 -3 0 -9 26.31 6.53
 -3 0 -9 19.19 4.15
 3 0 9 17.44 2.93
 3 0 9 18.2 3.24
 3 0 9 19.55 3.98
 -3 0 -9 19.58 4.8
 -3 0 -9 33.99 6.49
 3 0 9 24.21 3.34
 -3 0 -9 17.52 5.21
 3 0 9 24.01 3.98
 3 0 9 18.44 3.49
 3 0 10 755.04 46.64
 3 0 10 793.09 47.03
 3 0 10 804.51 47.29
 -3 0 -10 787.65 48.15
 -3 0 -10 864.72 48.02
 -3 0 -10 805.59 47.46
 -3 0 -10 768.9 48.02
 3 0 10 854.91 47.73
 3 0 11 98.05 7.99
 -3 0 -11 112.16 10.36
 3 0 11 117.11 8.96
 3 0 11 112.99 8.98
 -3 0 -11 105.34 9.89
 3 0 11 105.68 8.32
 3 0 12 14.23 2.98
 3 0 12 17.7 3.73
 3 0 12 16.29 3.55
 -3 0 -12 15.16 4.67
 -3 0 -12 24.19 5.7
 -3 0 -13 10.59 4.04
 -3 0 -13 12.28 4.85
 3 0 13 7.23 2.59
 3 0 13 9.34 3.05
 3 0 14 11.13 2.74
 -3 0 -14 12.37 3.96
 -3 0 -14 12.48 2.97
 3 0 15 3.37 1.58
 -3 0 -15 6.26 2.88
 3 0 15 1.99 2.2
 3 1 -17 4.35 2.22
 -3 1 17 6.22 2.45
 -3 1 17 3.24 1.71
 3 1 -16 17.97 3.32
 3 1 -16 20.02 3.95
 -3 1 16 16.34 3.93
 -3 1 16 15.21 3.71
 -3 1 16 15.57 2.66
 -3 1 16 12.74 3.04
 3 1 -15 31.83 4.83
 -3 1 15 25.99 4.92
 -3 1 15 25.64 3.58
 -3 1 15 24.9 4.66
 -3 1 15 24.39 4.42
 -3 1 15 24.81 3.74
 3 1 -14 70.38 7.64
 -3 1 14 77.49 8.04
 -3 1 14 84.49 7.2
 -3 1 14 91.77 8.38
 3 1 -14 77.25 7.97
 -3 1 14 83.23 7.84
 -3 1 14 73.38 6.73
 -3 1 13 28.55 4.17
 3 1 -13 29.07 6.03
 -3 1 13 33.5 5.42
 3 1 -13 37.42 7.83
 3 1 -13 31.34 6.11
 -3 1 13 30.31 5.5
 -3 1 13 31.81 4.44
 3 1 -12 777.39 46.67
 3 1 -12 784.84 46.84
 3 1 -12 823.44 48.4
 -3 1 12 794.08 46.35
 -3 1 12 757.71 47.02
 -3 1 12 720.92 46.71
 -3 1 12 839.84 46.45
 -3 1 11 113.17 9.78
 3 1 -11 146.71 12.15
 -3 1 11 142.37 9.89
 3 1 -11 138.59 12.05
 3 1 -11 143 11.09
 -3 1 11 125.21 10.17
 -3 1 11 141.89 9.96
 3 1 -11 136.55 11.09
 -3 1 10 120.5 9.48
 3 1 -10 170.63 12.65
 3 1 -10 129.22 10.4
 3 1 -10 140.2 10.71
 3 1 -10 138.87 11.44
 3 1 -10 141.77 11.54
 -3 1 10 125.57 9.75
 3 1 -9 506.42 32.36
 -3 1 9 552.97 31.68
 -3 1 9 552.9 31.92
 3 1 -9 478.54 32.1
 3 1 -9 533.56 32.67
 -3 1 9 540.73 31.45
 -3 1 8 31.41 3.29
 3 1 -8 28.72 3.78
 -3 1 8 33.87 3.71
 3 1 -8 25.9 5.46
 -3 1 8 32.59 3.46
 -3 1 8 33.94 4.36
 -3 1 8 29.72 3.86
 -3 1 8 33.58 4.32
 3 1 -8 29.4 3.81
 3 1 -8 35.94 4.9
 3 1 -8 29.22 4.81
 3 1 -8 29.31 4.67
 3 1 -8 25.96 3.71
 3 1 -7 337.32 25.76
 -3 1 7 451.89 26.23
 3 1 -7 432.78 26.28
 3 1 -7 446.67 27.65
 -3 1 7 437.8 25.4
 3 1 -7 393.14 25.99
 -3 1 7 471.99 26.85
 3 1 -7 369.08 25.69
 -3 1 7 447.64 26.94
 -3 1 7 516.48 25.96
 -3 1 7 445.17 25.36
 -3 1 7 461.35 26.08
 3 1 -7 436.11 26.32
 3 1 -7 425.58 26.62
 -3 1 6 1300.26 71.73
 3 1 -6 1267.49 71.73
 3 1 -6 1193.91 72.39
 3 1 -6 1199.38 71.33
 -3 1 6 1254.37 71.11
 -3 1 6 1126.25 71.71
 -3 1 6 1351.37 71.21
 3 1 -6 1228.75 71.4
 -3 1 5 394.52 22.03
 3 1 -5 337.91 22.07
 3 1 -5 347.74 22.8
 3 1 -5 386.9 22.39
 -3 1 5 382.53 22.47
 3 1 -5 342.97 22.32
 -3 1 5 378.98 21.83
 3 1 -4 534.58 33.46
 -3 1 4 562.42 32.21
 -3 1 4 608.1 32.73
 3 1 -4 561.32 32.97
 3 1 -4 536.51 32.89
 -3 1 3 692.86 37.82
 3 1 -3 633.9 38.45
 -3 1 3 679.27 38.29
 3 1 -3 614.26 39.05
 -3 1 2 640.38 35.44
 3 1 -2 646.7 35.97
 -3 1 2 624.19 35.89
 -3 1 2 609.23 35.19
 -3 1 1 1933.4 111.39
 -3 1 1 1972.03 111.58
 3 1 -1 2046.64 111.5
 -3 1 1 1953.26 111.77
 -3 1 1 1997.37 111.16
 3 1 0 102.38 6.92
 -3 1 0 106.2 7.35
 -3 1 0 110.27 7.23
 3 1 0 112.71 7.32
 3 1 0 111.06 7.15
 3 1 0 113.13 7.26
 3 1 0 109.71 7.06
 -3 1 -1 1663.7 94.89
 3 1 1 1599.67 94.67
 3 1 1 1682.66 94.06
 3 1 1 1799.09 94.9
 3 1 1 1764.42 94.56
 3 1 1 1566.94 94.5
 -3 1 -2 576.52 33.86
 3 1 2 607.81 33.86
 -3 1 -2 575.66 34.5
 3 1 2 586.71 34.36
 -3 1 -3 295.92 19.25
 3 1 3 340.25 18.78
 -3 1 -3 289.79 18.49
 -3 1 -4 128 10.15
 3 1 4 150.6 9.65
 -3 1 -4 137.96 9.15
 -3 1 -4 141.3 9.47
 -3 1 -5 90.41 7.33
 3 1 5 96.89 7.17
 -3 1 -5 98.95 7.22
 3 1 5 104.88 6.95
 3 1 5 104.82 7.87
 -3 1 -5 99.6 7.19
 3 1 5 102.04 7.08
 3 1 5 107.41 7.77
 -3 1 -5 79.12 7.68
 3 1 5 102.76 6.83
 3 1 6 397.25 24.06
 -3 1 -6 316.83 24.34
 -3 1 -6 450.51 23.82
 3 1 6 367.34 23.15
 -3 1 -6 347.03 23.54
 3 1 6 413.29 23.08
 -3 1 -6 371.69 23.38
 3 1 6 380.1 24.15
 3 1 6 413 23
 3 1 6 399.85 23.14
 -3 1 -6 338.24 23.09
 -3 1 -6 366.46 24.49
 3 1 6 398.64 24.18
 -3 1 -7 35.69 5.14
 3 1 7 34.24 3.88
 3 1 7 32.32 3.78
 -3 1 -7 30.61 4.63
 -3 1 -7 21.97 3.76
 3 1 7 33.09 3.81
 -3 1 -7 34.54 3.86
 -3 1 -8 378.46 24.01
 3 1 8 375.47 22.92
 -3 1 -8 459.04 24.89
 3 1 8 382.67 23.2
 3 1 8 400.43 23.15
 -3 1 -8 338.92 23.47
 -3 1 -8 312.48 23.24
 3 1 9 103.18 7.84
 -3 1 -9 74.95 10.06
 -3 1 -9 106.23 9.84
 3 1 9 96.6 8.01
 3 1 9 104.75 8.26
 -3 1 -9 91.45 9.25
 3 1 9 116.82 8.39
 -3 1 -9 81.08 8.69
 3 1 10 260.66 15.28
 -3 1 -10 186.96 16.17
 3 1 10 219.02 14.92
 3 1 10 249.04 15.65
 -3 1 -10 230.9 17.14
 -3 1 -10 190.14 16.88
 -3 1 -11 39.29 7.53
 -3 1 -11 57.28 8.71
 3 1 11 38.86 4.79
 3 1 11 45.17 5.4
 -3 1 -11 37.77 5.77
 3 1 11 44.42 5.18
 3 1 11 38.66 4.45
 -3 1 -11 39.21 7.3
 3 1 12 93.16 8.27
 3 1 12 101.73 7.25
 -3 1 -12 114.09 10.03
 -3 1 -12 97.55 9.99
 3 1 12 97.4 7.95
 3 1 12 91.19 7.68
 -3 1 -12 79.63 8.01
 3 1 13 44.84 4.96
 3 1 13 47.94 5.47
 3 1 13 51.31 4.92
 -3 1 -13 62.9 7.55
 -3 1 -13 47.34 5.07
 3 1 14 43.65 4.69
 -3 1 -14 46.39 5.88
 3 1 14 35.23 3.82
 -3 1 -15 7.67 2.75
 3 1 15 9.3 1.98
 3 1 15 4.38 2.18
 3 2 -17 10.75 2.59
 -3 2 17 10.12 1.97
 -3 2 16 63.83 6.15
 3 2 -16 60.9 6.78
 3 2 -16 78.2 5.99
 -3 2 16 65.88 5.92
 -3 2 16 67.9 5.53
 -3 2 16 68.62 5.34
 3 2 -15 90.59 8.18
 -3 2 15 103.89 7.6
 3 2 -15 98.64 9.49
 -3 2 15 78.62 7.13
 -3 2 15 95.82 8.09
 -3 2 15 107.03 7.74
 3 2 -15 109.05 8.6
 3 2 -14 21.53 5.86
 -3 2 14 18.23 3.73
 -3 2 14 24.32 3.94
 -3 2 14 19.58 4.23
 3 2 -14 22.99 6.77
 -3 2 14 16.46 3.43
 3 2 -14 28.29 6.01
 -3 2 13 63.31 6.8
 -3 2 13 62.45 7.3
 3 2 -13 72.78 9.19
 3 2 -13 76.23 8.61
 3 2 -13 72.31 8.64
 -3 2 13 73.16 6.67
 -3 2 13 65.22 6.45
 -3 2 13 58.81 6.5
 3 2 -12 125.14 11.07
 -3 2 12 97.55 8.96
 3 2 -12 121.73 11.44
 3 2 -12 124.93 10.98
 -3 2 12 112.32 9.48
 3 2 -12 128.29 11.56
 -3 2 12 124.14 9.38
 -3 2 12 119.82 9.94
 3 2 -11 195.15 15.5
 3 2 -11 183.41 14.3
 -3 2 11 175.57 12.8
 -3 2 11 191.41 13.33
 -3 2 11 180.82 12.71
 3 2 -11 174.55 14.31
 -3 2 10 418.21 24.54
 -3 2 10 486.24 25.33
 -3 2 10 418.27 24.4
 3 2 -10 374.64 25.45
 3 2 -10 335.85 25.18
 3 2 -10 315.2 25.64
 3 2 -9 85.64 9.95
 -3 2 9 114.35 7.74
 -3 2 9 121.49 8.32
 3 2 -9 94.05 8.89
 -3 2 9 104.9 7.64
 3 2 -9 88.5 8.9
 3 2 -9 77.35 8
 3 2 -8 736.65 40.15
 3 2 -8 606.31 39.38
 -3 2 8 707.44 38.85
 3 2 -8 675.89 39.53
 3 2 -8 655.59 39.6
 3 2 -8 538.9 38.68
 -3 2 8 769.02 38.97
 3 2 -7 362.18 23.89
 3 2 -7 389.75 23.85
 -3 2 7 361.64 24.7
 3 2 -7 494.35 24.7
 3 2 -7 369.02 24.33
 -3 2 7 386.58 24.57
 3 2 -7 392.37 25.98
 3 2 -7 389.91 23.97
 -3 2 7 395.42 23.23
 3 2 -7 373.06 24.57
 3 2 -6 941.29 52.71
 3 2 -6 902.56 52.09
 3 2 -6 926.08 52.55
 -3 2 6 938.58 51.42
 -3 2 6 767.48 50.65
 3 2 -6 943.86 51.89
 3 2 -6 911.08 53.88
 -3 2 6 968.9 52.62
 3 2 -6 1105.69 52.06
 3 2 -5 356.18 24.2
 3 2 -5 377.94 23.21
 3 2 -5 339.54 22.76
 -3 2 5 395.81 23.23
 3 2 -5 399.7 23.39
 3 2 -5 374.39 24.23
 -3 2 5 399.03 22.31
 -3 2 4 350.19 20.51
 3 2 -4 345.91 20.71
 3 2 -4 335.96 21.68
 -3 2 4 358.75 19.9
 3 2 -4 314.25 21.48
 3 2 -4 321.74 20.51
 3 2 -4 319.59 20.44
 -3 2 3 330.48 19.93
 3 2 -3 362.37 20.51
 3 2 -3 360.05 21.63
 -3 2 3 325.81 19.73
 3 2 -3 329.74 21.23
 3 2 -2 7.65 2.9
 -3 2 2 9.85 1.8
 3 2 -2 11.6 2.02
 -3 2 2 9.36 1.93
 -3 2 2 8.36 0.86
 -3 2 2 8 0.9
 3 2 -1 1626.4 101.94
 -3 2 1 1674.79 101.11
 -3 2 1 1858.74 101.18
 -3 2 1 1765.31 100.47
 3 2 -1 1789.3 100.65
 3 2 -1 1938.95 101.16
 -3 2 1 1763.82 100.83
 3 2 -1 1849.48 101.05
 -3 2 0 1243.46 75.58
 -3 2 0 1340.85 75.06
 3 2 0 1377.92 75.9
 -3 2 0 1317.54 75.88
 3 2 0 1308.86 75.11
 3 2 0 1425.26 75.86
 3 2 0 1368.72 75.74
 -3 2 -1 492.22 30.14
 3 2 1 624.51 31.1
 3 2 1 593 30.84
 3 2 1 478.31 29.52
 3 2 1 634.64 30.79
 -3 2 -1 584.47 31.07
 3 2 1 541.39 30.27
 -3 2 -2 193.01 13.41
 3 2 2 203.9 13.01
 3 2 2 226.59 13.41
 3 2 2 207.53 11.86
 -3 2 -2 195.1 12.69
 -3 2 -3 37.31 3.68
 3 2 3 42.21 3.83
 3 2 3 44.95 4.15
 -3 2 -3 32.66 4.22
 -3 2 -4 655.08 41.32
 3 2 4 726.2 41.98
 -3 2 -4 642.4 42.28
 -3 2 -4 819.53 41.14
 3 2 4 672.44 40.79
 3 2 4 730.66 41.5
 -3 2 -4 693.54 41.84
 -3 2 -5 38.82 3.99
 -3 2 -5 29.36 3.73
 -3 2 -5 28.12 4.51
 -3 2 -5 32.74 4.07
 3 2 5 34.87 3.9
 3 2 5 39.9 3.44
 3 2 5 37.77 4.34
 -3 2 -5 43.36 4.9
 3 2 6 112.69 7.54
 3 2 6 96.51 7.12
 -3 2 -6 98.22 7.79
 -3 2 -6 103.06 8.01
 3 2 6 113.45 7.72
 -3 2 -7 34.6 5.44
 3 2 7 31.99 3.66
 -3 2 -7 23.43 4.32
 3 2 7 31.37 3.92
 -3 2 -7 33.8 4.73
 3 2 7 34.36 3.91
 -3 2 -8 208.49 14.17
 3 2 8 172.86 12.22
 3 2 8 183.61 12.52
 -3 2 -8 191.78 13.37
 -3 2 -8 150.81 12.68
 3 2 8 211.51 12.8
 3 2 8 190.02 12.56
 3 2 9 79.09 6.89
 -3 2 -9 100.03 10.56
 -3 2 -9 61.04 7.18
 3 2 9 89.89 7.19
 -3 2 -9 99.08 9.52
 3 2 9 88.87 7.19
 -3 2 -9 77.34 7.99
 -3 2 -10 337.03 24.16
 -3 2 -10 431.71 25.23
 -3 2 -10 292.59 22.58
 3 2 10 374.93 23.16
 -3 2 -10 347.87 24.84
 3 2 10 386.38 22.84
 -3 2 -10 401.76 24.46
 -3 2 -11 35.71 7.81
 -3 2 -11 30.79 7.67
 -3 2 -11 29.52 8.62
 -3 2 -11 30.99 7.27
 3 2 11 42.26 4.97
 3 2 11 38.62 4.99
 3 2 11 40.35 5.35
 3 2 12 40.7 5.02
 3 2 12 36.3 4.57
 3 2 12 36.52 5.07
 -3 2 -12 36.08 7.1
 -3 2 -12 53.63 8.56
 -3 2 -12 34.08 7.24
 3 2 13 21.65 3.35
 3 2 13 22.12 3.77
 3 2 13 19.37 3.51
 3 2 13 21.24 2.91
 -3 2 -13 29.44 5.72
 3 2 14 3.32 2.33
 3 2 14 3.98 1.32
 3 2 14 2.9 1.9
 -3 2 -15 22.21 3.13
 3 2 15 29.46 2.82
 -3 3 16 14.72 2.12
 3 3 -16 13.61 2.7
 -3 3 16 17.74 2.26
 3 3 -16 20.72 2.78
 -3 3 16 11.46 2.39
 3 3 -15 7.6 4.05
 3 3 -15 14.72 2.86
 3 3 -15 13.76 4.03
 -3 3 15 6.78 2.35
 3 3 -15 5.65 3.96
 -3 3 15 9.22 2.89
 -3 3 15 10.03 2.52
 -3 3 15 10.75 2.62
 3 3 -14 161.2 11.78
 -3 3 14 168.5 10.9
 -3 3 14 136.06 10.53
 -3 3 14 140.23 11.05
 3 3 -14 161.54 11.79
 3 3 -14 140.49 11.76
 3 3 -13 51.18 7.15
 -3 3 13 54.1 6.08
 3 3 -13 55 7.86
 -3 3 13 47.44 5.38
 -3 3 13 64.37 6.02
 -3 3 13 49.88 5.52
 3 3 -13 59.44 7.72
 3 3 -12 158.34 13.24
 3 3 -12 148.5 11.92
 -3 3 12 126.65 10.14
 -3 3 12 131.48 10.81
 3 3 -12 153.15 12.12
 -3 3 12 120.69 9.98
 -3 3 12 145.8 10.43
 -3 3 11 236.64 15.68
 -3 3 11 226 14.95
 3 3 -11 205.77 16.88
 3 3 -11 233.12 16.39
 -3 3 11 212.64 14.86
 3 3 -11 220.74 16.25
 -3 3 10 93.57 7.67
 3 3 -10 83.69 10.28
 3 3 -10 97.24 9.2
 -3 3 10 98.4 7.71
 3 3 -10 79.92 9.15
 -3 3 10 113.21 8.53
 -3 3 9 390.41 21.93
 3 3 -9 354.72 23.4
 3 3 -9 320.75 22.59
 -3 3 9 361.21 21.73
 3 3 -9 316.37 22.53
 3 3 -8 12.65 4.03
 3 3 -8 13.9 5.65
 -3 3 8 15.24 2.56
 -3 3 8 16.45 2.75
 3 3 -8 12.36 4.64
 3 3 -7 168.23 11.09
 3 3 -7 134.16 10.76
 -3 3 7 153.74 10.01
 -3 3 6 195.38 13.96
 3 3 -5 479.07 27.83
 -3 3 5 485.01 27.48
 3 3 -5 433.77 27.37
 3 3 -5 430.08 28.44
 3 3 -5 412.36 28.71
 3 3 -4 59.91 5.08
 -3 3 4 55.41 4.71
 3 3 -4 48.23 5.32
 3 3 -4 52.51 6.07
 3 3 -4 52.68 4.52
 3 3 -4 47.4 5.53
 3 3 -3 362.94 21.08
 3 3 -3 313.48 21.63
 -3 3 3 356.47 20.87
 3 3 -3 316.65 21.17
 3 3 -3 341.68 20.34
 3 3 -3 341.58 22.48
 -3 3 2 136.27 8.47
 3 3 -2 161.45 9.58
 3 3 -2 136.69 10.23
 -3 3 2 155.41 9.55
 3 3 -2 138.31 11.13
 -3 3 2 159.08 9.93
 -3 3 2 138.46 8.5
 3 3 -2 170.74 10.2
 3 3 -2 151.72 9.84
 3 3 -1 91.98 6.36
 3 3 -1 79.8 6.25
 -3 3 1 70.88 4.82
 3 3 -1 79.21 7.41
 -3 3 1 84.29 6.27
 3 3 -1 79.32 5.94
 3 3 -1 90.96 5.53
 -3 3 1 84.85 5.34
 -3 3 1 86.69 5.74
 3 3 -1 85.47 5.7
 -3 3 0 12.33 1.85
 -3 3 0 14.9 2.29
 3 3 0 14.73 2.19
 3 3 0 15.31 2.23
 -3 3 0 13.89 1.81
 3 3 0 13.13 1.81
 3 3 0 15.45 2.18
 3 3 0 13.55 2.01
 -3 3 0 10.85 1.36
 3 3 0 15.27 3.24
 -3 3 0 12.34 2.47
 -3 3 -1 531.56 31.67
 -3 3 -1 540.38 32.38
 3 3 1 495.62 33.51
 3 3 1 537.14 32.09
 -3 3 -1 546.49 32.73
 3 3 1 575.13 32.33
 -3 3 -1 568.77 32.16
 3 3 1 585.58 32.64
 -3 3 -2 92.62 6.95
 -3 3 -2 101.4 7.85
 3 3 2 112.35 7.83
 -3 3 -2 103.75 7.39
 -3 3 -3 344.12 22.78
 -3 3 -3 326.68 21.72
 3 3 3 398.94 22.22
 -3 3 -3 374.17 22.34
 3 3 4 275.46 16.71
 -3 3 -4 241.27 16.87
 3 3 5 489.61 28.72
 -3 3 -5 481.79 28.93
 3 3 6 126.14 8.93
 3 3 6 131.36 8.9
 -3 3 -6 116.92 9.17
 -3 3 -6 151.36 10.04
 -3 3 -7 163.41 11.51
 3 3 7 166.91 10.48
 3 3 7 154.7 10.45
 3 3 7 168.74 10.77
 -3 3 -8 6.36 4.55
 3 3 8 6.53 2.8
 3 3 8 5.4 2.28
 -3 3 -8 7.16 3.87
 3 3 8 5.55 2.31
 3 3 8 6.81 2.69
 -3 3 -9 144.78 12.15
 3 3 9 153.38 10.54
 3 3 9 146.04 10.32
 3 3 9 142.5 10.07
 -3 3 -9 137.63 11.15
 -3 3 -10 100.93 10.35
 -3 3 -10 104.87 11.7
 3 3 10 108.45 8.43
 -3 3 -10 120.38 11.35
 3 3 10 113.06 9.06
 -3 3 -11 10.68 5.66
 -3 3 -11 10.99 7.59
 3 3 11 10.42 3.02
 3 3 11 10.92 3.36
 -3 3 -11 10.38 6.09
 3 3 11 12.2 3.38
 -3 3 -11 4.47 6.07
 -3 3 -12 21.17 6.85
 3 3 12 26.1 3.87
 3 3 12 26.96 4.04
 3 3 12 25.88 3.72
 -3 3 -12 22.82 6
 3 3 13 9.69 2.09
 3 3 13 7.81 2.28
 3 3 13 8.26 1.75
 -3 3 -13 14.93 4.49
 3 3 13 8.51 2.55
 3 3 13 7.65 2.48
 -3 3 -13 7.17 2.76
 3 3 14 5.75 1.81
 3 3 14 6.81 1.67
 3 4 -15 3.78 2.36
 -3 4 15 5.37 1.34
 -3 4 15 4.43 1.46
 3 4 -15 2.12 2.33
 -3 4 15 3.02 1.32
 -3 4 14 10.99 2.54
 -3 4 14 10.51 2.53
 -3 4 14 11.09 2.32
 3 4 -14 14.17 4.05
 3 4 -13 34.69 4.59
 3 4 -13 46.36 6.2
 -3 4 13 37.87 4.39
 -3 4 13 39.87 4.11
 -3 4 12 48.03 5.27
 3 4 -12 47.17 5.6
 -3 4 12 54.35 5.47
 3 4 -12 51.83 6.81
 -3 4 12 39.57 4.47
 -3 4 12 47.53 4.85
 -3 4 11 90.7 7.6
 3 4 -11 93.15 8.43
 -3 4 11 108.26 8.41
 3 4 -11 97.36 9.74
 -3 4 11 113.45 8.2
 3 4 -11 101.23 9.03
 -3 4 10 71.61 6.29
 3 4 -10 60.28 8.45
 3 4 -10 86.59 7.51
 -3 4 10 87.08 7.23
 3 4 -10 73.72 7.7
 3 4 -9 85.35 9.44
 -3 4 9 103.02 7.62
 3 4 -9 79.06 8.36
 -3 4 8 36.9 3.89
 3 4 -8 40.73 6.48
 3 4 -8 32.01 5.15
 -3 4 -4 204.62 13.37
 3 4 6 41.74 4.19
 -3 4 -6 41.85 5.12
 -3 4 -7 118.3 9.52
 3 4 7 107.72 7.92
 -3 4 -7 99.6 8.44
 3 4 7 95.79 7.5
 3 4 8 52.54 4.82
 -3 4 -8 58.41 6.99
 -3 4 -8 54.24 5.84
 3 4 8 60.13 5.24
 -3 4 -9 8.72 4.9
 3 4 9 19.95 3.61
 -3 4 -9 10.27 5.53
 3 4 9 12.21 2.82
 -3 4 -10 12.93 4.82
 -3 4 -10 2.6 4.75
 3 4 10 6.32 2.8
 3 4 10 5.69 2.18
 -3 4 -10 1.31 5.6
 3 4 11 30.15 3.68
 -3 4 -11 22.37 4.82
 -3 4 -11 25.55 5.23
 3 4 11 30.75 3.66
 -3 4 -11 27.01 5.71
 -3 4 -12 33.64 4.68
 -3 4 -12 28.6 3.75
 3 4 12 26.71 3.12
 -3 4 -12 25.13 4.53
 3 4 13 12.83 1.59
 3 4 13 13.45 1.95
 3 5 -13 6.55 2.66
 -3 5 13 3.94 1.48
 3 5 -13 4.11 2.32
 3 5 -12 34.03 4.46
 3 5 -12 40.2 4.94
 -3 5 12 32.97 3.21
 -3 5 12 39.68 3.73
 3 5 -11 21.53 4.95
 -3 5 11 20.44 3.13
 3 5 -11 23.32 4.45
 -3 5 11 18.2 2.56
 3 5 -10 32.89 4.96
 -3 5 10 29.01 3.31
 -3 5 9 4.65 1.94
 -3 5 8 231.98 14.63
 -3 5 -5 27.58 3.78
 3 5 6 343.95 20.64
 -3 5 -6 297.18 20.86
 -3 5 -7 114.67 9.1
 -3 5 -8 163.94 11.64
 -3 5 -8 161.53 12.03
 3 5 8 170.5 11.07
 -3 5 -9 22.44 3.64
 -3 5 -9 19.26 5.87
 3 5 9 19.96 2.67
 -3 5 -9 21.11 4.67
 -3 5 -9 18.29 4.01
 3 5 10 2.68 1.69
 -3 5 -10 7.95 4.41
 -3 5 -10 3.25 3.36
 3 5 10 3.33 1.48
 3 5 10 -0.3 1.9
 -3 5 -10 2.21 2.6
 3 5 11 27.61 2.75
 -3 5 -11 33.65 4.01
 -3 5 -11 26.08 3.18
 3 5 11 23.4 2.44
 3 5 11 28.27 2.52
 3 6 -10 33.76 3.15
 -3 6 10 28.09 2.52
 3 6 -9 14.23 2.88
 3 6 -8 104.48 7.49
 3 6 -7 198.43 12.7
 -3 6 -6 129.83 9.09
 -3 6 -7 118.82 8.3
 3 6 7 105.02 6.79
 -3 6 -7 94.96 7.23
 -3 6 -8 51.11 4.83
 4 -7 -4 17.85 2.61
 4 -7 -3 86.02 6.18
 4 -7 -3 80.74 5.61
 4 -7 -2 26.1 2.88
 4 -7 -1 57.05 4.43
 4 -7 0 24.9 2.84
 4 -7 1 36.36 3.26
 4 -7 2 48.16 3.76
 4 -7 3 20.06 2.16
 4 -6 -10 9.11 2.59
 -4 -6 10 7.4 2.05
 -4 -6 10 7.53 1.79
 4 -6 -9 26.71 3.93
 -4 -6 9 27.16 3.28
 -4 -6 8 51.4 5.45
 4 -6 -8 64.01 6.17
 4 -6 -8 70.07 5.35
 4 -6 -7 14.93 4.3
 -4 -6 7 14.96 3.5
 -4 -6 7 16.56 3.28
 4 -6 -7 14.89 2.82
 4 -6 -6 4.47 4.1
 -4 -6 6 1.37 3.09
 4 -6 -6 2.03 2.1
 -4 -6 6 2.15 2.7
 4 -6 -5 80.15 7.25
 -4 -6 5 63.81 6.27
 -4 -6 5 60.08 5.94
 -4 -6 4 110 8.65
 -4 -6 4 120.47 8.96
 4 -6 -4 119.81 9.61
 4 -6 -4 112.94 8.44
 4 -6 -3 17.27 4.53
 -4 -6 3 14.95 3.21
 -4 -6 3 12.02 3.1
 4 -6 -3 16.18 3.14
 -4 -6 2 19.1 3.2
 4 -6 -2 19.27 4.64
 4 -6 -2 24.73 3.37
 -4 -6 2 18.28 3.43
 -4 -6 2 17.02 3.14
 -4 -6 1 197.38 12.71
 4 -6 -1 206.04 13.81
 -4 -6 1 187.38 12.52
 -4 -6 1 192.87 13.32
 4 -6 -1 188.03 12.66
 4 -6 0 34.99 5.24
 4 -6 0 22.94 4.6
 -4 -6 0 27.8 4.5
 4 -6 0 34.45 4
 4 -6 1 13.44 4.07
 -4 -6 -1 17.41 3.93
 4 -6 1 17.66 4.41
 4 -6 1 15.77 3.06
 4 -6 2 18.67 4.15
 4 -6 2 18.85 3.66
 -4 -6 -2 19.19 4.31
 4 -6 2 23.34 3.21
 4 -6 3 10.59 3.61
 4 -6 3 14.58 2.68
 4 -6 3 14.49 3.77
 -4 -6 -3 10.03 3.59
 4 -6 4 84.95 6.08
 4 -6 4 64.41 6.98
 4 -6 4 86.22 6.57
 -4 -6 -4 83.04 7.22
 4 -6 5 22.54 4.24
 -4 -6 -5 27.1 4.01
 4 -6 6 66.89 6.58
 -4 -6 -6 87.32 6.5
 4 -6 7 4.81 2.07
 4 -6 7 4.12 2.27
 -4 -6 -8 79.25 4.03
 4 -6 8 24.25 3.27
 4 -5 -13 0.79 2.05
 -4 -5 13 1.17 1.24
 -4 -5 12 12.66 2.65
 4 -5 -12 17.33 3.6
 -4 -5 12 14.53 2.34
 -4 -5 11 18.57 3.35
 4 -5 -11 17.14 3.3
 4 -5 -11 17.84 4.33
 -4 -5 11 17.6 3.1
 -4 -5 11 17.04 3.62
 4 -5 -11 18.92 4.11
 4 -5 -10 176.35 12.79
 -4 -5 10 152.57 12.01
 -4 -5 10 154.12 12.1
 4 -5 -10 200.31 12.58
 4 -5 -10 167.41 11.9
 -4 -5 9 138.34 11.36
 -4 -5 9 151.58 11.84
 4 -5 -9 156.83 12.22
 4 -5 -9 136.6 11.19
 4 -5 -8 15.85 4.31
 4 -5 -8 15.44 5.24
 -4 -5 8 13.88 3.26
 4 -5 -8 12.98 4.14
 4 -5 -7 172.99 13.64
 -4 -5 7 193.24 11.66
 -4 -5 7 151.11 13.42
 4 -5 -7 168.7 12.77
 4 -5 -7 177.84 12.82
 4 -5 -6 41.12 5.39
 4 -5 -6 41.93 6.76
 4 -5 -6 37.18 5.35
 -4 -5 6 47.52 4.47
 -4 -5 6 38.04 6.29
 -4 -5 5 24.77 3.35
 4 -5 -5 21.18 5.52
 4 -5 -5 24.86 4.17
 -4 -5 5 15.37 4.92
 4 -5 -5 23 4.35
 4 -5 -4 14 5.1
 -4 -5 4 17.42 4.43
 4 -5 -4 21 3.72
 -4 -5 4 14.2 3.32
 4 -5 -4 17.99 4.08
 4 -5 -3 285.31 18.14
 4 -5 -3 274.9 17.25
 -4 -5 3 236.52 17.29
 -4 -5 3 261.82 17.09
 -4 -5 3 238.21 16.99
 -4 -5 2 247.74 16.06
 -4 -5 2 219.71 15.91
 4 -5 -2 235.95 15.79
 4 -5 -2 246.88 16.56
 -4 -5 2 226.61 15.57
 4 -5 -1 13.14 4.92
 -4 -5 1 13.35 3.06
 -4 -5 1 17.03 4.12
 -4 -5 1 16.01 3.54
 4 -5 -1 14.71 3.9
 4 -5 0 220.95 15.56
 4 -5 0 193.82 14.53
 -4 -5 0 219.82 15.3
 4 -5 0 215.53 14.63
 -4 -5 0 218.48 14.31
 -4 -5 0 223.9 14.4
 -4 -5 -1 167.21 11.49
 4 -5 1 180.05 13.11
 4 -5 1 157.68 12.47
 -4 -5 -1 162.55 12.84
 4 -5 1 183.17 12.27
 -4 -5 -1 170.63 11.6
 4 -5 2 84.97 8.29
 -4 -5 -2 73.49 7.98
 4 -5 2 81.63 8.2
 4 -5 2 72.73 7.15
 -4 -5 -3 297.72 20.24
 4 -5 3 316.21 21.01
 4 -5 3 290.17 19.2
 4 -5 4 164.93 13.53
 4 -5 4 179.9 11.86
 -4 -5 -4 141.11 12.52
 4 -5 5 11.54 4.33
 4 -5 5 12.85 5.59
 4 -5 5 4.41 2.46
 -4 -5 -5 1.17 3.05
 -4 -5 -5 4.34 4.04
 4 -5 5 11.97 3.61
 4 -5 6 122.9 8.49
 4 -5 6 120.89 8.46
 4 -5 6 113.36 10.22
 -4 -5 -6 98.78 8.62
 4 -5 7 39.56 6.25
 4 -5 7 49.5 5.24
 -4 -5 -7 34.79 5.22
 -4 -5 -7 35.12 4.98
 4 -5 7 26.79 3.99
 4 -5 8 42.44 4.23
 4 -5 8 28.83 3.66
 4 -5 8 23.22 4.97
 -4 -5 -8 34.06 4.62
 -4 -5 -8 29.51 4.43
 4 -5 9 102.7 6.5
 -4 -5 -9 107.47 7.31
 4 -5 10 43.56 4.66
 -4 -5 -10 67.84 4.64
 -4 -4 15 7.25 1.72
 4 -4 -15 10.54 2.29
 4 -4 -14 84.65 6.6
 -4 -4 14 84.82 6.91
 4 -4 -14 102.54 7.37
 4 -4 -13 9.44 3.9
 4 -4 -13 5.18 2.99
 -4 -4 13 5.45 2.46
 -4 -4 13 5.69 3.03
 4 -4 -12 4.4 4.29
 -4 -4 12 6.18 3.28
 -4 -4 12 9.41 3.74
 4 -4 -12 12.19 4.27
 4 -4 -12 7.11 3.54
 4 -4 -11 14.39 4.09
 -4 -4 11 15.13 4.38
 -4 -4 11 9.06 4.14
 4 -4 -11 14.69 5.28
 4 -4 -11 8.88 4.08
 4 -4 -10 203.59 14.07
 -4 -4 10 162.99 13.54
 -4 -4 10 184.12 13.91
 4 -4 -10 196.34 14.31
 4 -4 -10 172.62 13.59
 4 -4 -10 175.29 13.54
 4 -4 -9 72.37 7.7
 4 -4 -9 73.33 7.66
 4 -4 -9 83 8.57
 -4 -4 9 63.82 7.72
 -4 -4 9 73.04 7.77
 -4 -4 9 69.69 6.3
 -4 -4 9 63.79 7.24
 4 -4 -9 71.82 7.65
 4 -4 -8 165.33 13.12
 -4 -4 8 160.7 13.21
 -4 -4 8 154.96 12.96
 -4 -4 8 159.28 12.88
 4 -4 -8 172.12 13.5
 -4 -4 8 178.71 11.57
 4 -4 -8 190.33 13.19
 4 -4 -8 169.41 12.85
 4 -4 -7 23.28 4.92
 -4 -4 7 27.51 4.19
 -4 -4 7 27.38 5.69
 4 -4 -7 28.71 5.21
 -4 -4 7 25.71 4.97
 4 -4 -7 25.81 5.93
 -4 -4 7 25.67 4.54
 4 -4 -7 27.17 5.06
 -4 -4 6 168.23 10.91
 4 -4 -6 161.03 12.51
 -4 -4 6 160.29 12.1
 -4 -4 6 153.41 12.34
 4 -4 -6 152.06 12.11
 4 -4 -6 173.9 12.11
 4 -4 -6 157.13 11.87
 4 -4 -5 212.48 16.15
 -4 -4 5 239.75 15
 4 -4 -5 257.5 15.79
 4 -4 -5 234.24 16.48
 -4 -4 5 256.12 16.94
 -4 -4 5 237.26 16.76
 4 -4 -5 248.23 16.13
 -4 -4 5 237.61 16.3
 4 -4 -5 239.35 16.12
 4 -4 -4 21.51 4.73
 4 -4 -4 22.73 3.81
 -4 -4 4 25.68 4.72
 -4 -4 4 22.7 4.05
 4 -4 -4 23.08 4.32
 -4 -4 4 20.3 4.09
 -4 -4 4 15.19 3.29
 -4 -4 4 22.16 3.1
 4 -4 -4 20.37 3.78
 4 -4 -4 20.29 4.1
 -4 -4 3 253.98 17.18
 4 -4 -3 252.05 17.03
 -4 -4 3 254.33 17.47
 4 -4 -3 261.1 17.51
 -4 -4 3 264.87 17.92
 4 -4 -3 268.95 16.89
 4 -4 -3 273.06 17.08
 4 -4 -3 265.25 16.81
 4 -4 -2 24.63 4.31
 -4 -4 2 26.57 4.21
 -4 -4 2 26.76 4.58
 4 -4 -2 19.56 4.7
 4 -4 -2 19.46 3.88
 -4 -4 2 27.44 4.52
 -4 -4 1 227.11 14.93
 -4 -4 1 232.91 15.31
 -4 -4 1 212.23 14.67
 4 -4 -1 225.66 15.13
 4 -4 -1 200.42 14.31
 4 -4 -1 228.86 15.11
 -4 -4 1 216.86 14.4
 4 -4 -1 219.58 14.72
 4 -4 0 59.49 6.43
 -4 -4 0 61.62 6.3
 -4 -4 0 56.27 5.41
 4 -4 0 50.01 5.6
 -4 -4 0 56.48 6.12
 4 -4 0 57.86 6.48
 -4 -4 0 55.22 5.29
 4 -4 0 61.37 5.96
 -4 -4 -1 227.33 14.76
 -4 -4 -1 232.75 15.66
 4 -4 1 230.25 15.63
 -4 -4 -1 208.53 14.29
 4 -4 1 213.93 15.25
 4 -4 1 224.23 15.25
 -4 -4 -1 220.89 15.52
 -4 -4 -1 227.59 14.36
 4 -4 1 211.25 14.82
 -4 -4 -2 26 4.29
 -4 -4 -2 23.97 4.79
 4 -4 2 24.15 5.03
 4 -4 2 25.23 4.96
 -4 -4 -2 26.51 4.95
 -4 -4 -2 23.28 3.14
 -4 -4 -2 24.37 3.24
 4 -4 2 25.25 5.41
 4 -4 2 23.37 4.4
 -4 -4 -3 236.57 16.33
 -4 -4 -3 266.86 17.34
 4 -4 3 252.18 16.39
 4 -4 3 213.28 15.37
 4 -4 3 260.57 17.25
 4 -4 3 227.12 15.79
 -4 -4 -3 226.93 15.66
 -4 -4 -4 215.33 14.97
 -4 -4 -4 219.02 15.56
 4 -4 4 184.04 13.89
 4 -4 4 215.42 15.55
 4 -4 4 187.88 14.02
 4 -4 4 212.75 14.29
 -4 -4 -4 212.63 14.5
 -4 -4 -5 53.68 7.71
 -4 -4 -5 68.5 7.52
 -4 -4 -5 66.57 7.45
 4 -4 5 62.3 6.64
 4 -4 5 64.17 7.83
 4 -4 5 56.53 6.45
 4 -4 5 63.78 6.67
 -4 -4 -5 68.88 7.22
 -4 -4 -6 14.37 5.19
 -4 -4 -6 15.43 5.18
 4 -4 6 19.59 4.32
 4 -4 6 15.94 4.31
 4 -4 6 13.74 5.77
 4 -4 6 23.77 4.79
 -4 -4 -6 15.93 4.77
 4 -4 7 69.19 6.8
 -4 -4 -7 56.28 7.16
 4 -4 7 63.91 6.16
 4 -4 7 53.59 6.58
 -4 -4 -7 53.58 6.85
 -4 -4 -7 55.09 7.39
 4 -4 8 203 13.09
 4 -4 8 196.64 14.98
 -4 -4 -8 192.44 14.44
 4 -4 8 176.74 13.71
 -4 -4 -8 190.78 14.28
 -4 -4 -8 193.01 13.99
 4 -4 9 270.38 20.02
 4 -4 9 344.55 18.89
 -4 -4 -9 297.83 20.09
 4 -4 9 269.79 19.52
 -4 -4 -9 315.19 19.74
 4 -4 10 42.33 5.01
 4 -4 10 43.05 5.6
 -4 -4 -10 46.71 4.77
 -4 -4 -10 42.9 5.26
 4 -4 11 17.06 3.61
 -4 -4 -11 22.42 2.74
 -4 -4 -11 24.35 3.69
 4 -4 11 17.34 3.08
 4 -4 12 45.89 3.85
 4 -4 12 39.57 3.69
 4 -3 -16 71.55 5.75
 4 -3 -16 87.06 6.22
 -4 -3 16 73.8 5.95
 -4 -3 15 145.23 10.21
 4 -3 -15 138.7 9.94
 4 -3 -15 134.09 9.58
 4 -3 -14 51.07 5.66
 -4 -3 14 52.82 6.13
 4 -3 -14 57.77 6.07
 -4 -3 13 2.54 3.02
 4 -3 -13 6.68 4.13
 -4 -3 13 8.4 4.05
 4 -3 -13 7.43 4.27
 -4 -3 13 8.53 2.75
 4 -3 -12 152.1 12.95
 -4 -3 12 149.7 11.45
 4 -3 -12 154.12 12.48
 -4 -3 12 147.98 12.33
 -4 -3 12 144.73 11.66
 -4 -3 12 167.95 12.76
 4 -3 -12 161.56 12.78
 4 -3 -12 188.04 12.55
 4 -3 -12 166.14 12.58
 4 -3 -11 192.07 14.26
 4 -3 -11 180.6 14.09
 -4 -3 11 176.66 14.19
 -4 -3 11 187.68 14.04
 4 -3 -11 216.87 14.03
 -4 -3 11 176.55 13.65
 -4 -3 11 158.69 12.84
 -4 -3 11 171.67 13.04
 4 -3 -11 186.42 13.79
 4 -3 -11 176.32 13.73
 4 -3 -10 274.38 19.33
 4 -3 -10 290.02 19.72
 -4 -3 10 252.75 18.61
 -4 -3 10 278.05 19.85
 -4 -3 10 280.03 19.17
 -4 -3 10 290.73 19.44
 4 -3 -10 313.25 19.37
 4 -3 -10 305.64 19.24
 -4 -3 10 247.11 18.26
 -4 -3 9 78.52 7.66
 4 -3 -9 87.02 8.86
 -4 -3 9 80.68 8.66
 -4 -3 9 82.63 8.07
 -4 -3 9 97.08 7.33
 -4 -3 9 90.24 8.44
 -4 -3 9 87.41 8.23
 4 -3 -9 91.4 8.43
 4 -3 -9 86.05 8.22
 4 -3 -9 83.57 8.65
 -4 -3 8 207.55 15.5
 4 -3 -8 187.62 15.48
 -4 -3 8 250.84 14.49
 4 -3 -8 224.99 14.91
 4 -3 -8 230.62 16.12
 -4 -3 8 230.2 15.75
 4 -3 -8 233.37 15.81
 4 -3 -8 232.47 15.54
 -4 -3 8 223.47 16.24
 4 -3 -8 215.39 15.42
 4 -3 -7 109.2 9.01
 4 -3 -7 117.16 9.57
 -4 -3 7 106.7 9.33
 -4 -3 7 126.28 8.22
 4 -3 -7 104.48 8.54
 -4 -3 7 112.3 9.2
 4 -3 -7 117.21 9.45
 4 -3 -7 111.22 8.99
 -4 -3 7 114.9 9.73
 -4 -3 6 136.78 10.51
 4 -3 -6 144.33 10.6
 -4 -3 6 137.15 9.2
 4 -3 -6 137.57 10.18
 -4 -3 6 144.94 10.81
 4 -3 -6 143.32 10.15
 -4 -3 6 136.54 10.25
 4 -3 -6 136.03 9.76
 -4 -3 6 121.75 9.72
 -4 -3 5 764.5 46.18
 4 -3 -5 800.94 46.68
 4 -3 -5 786.5 46.13
 4 -3 -5 799.68 45.94
 -4 -3 5 782.21 45.23
 -4 -3 5 834.59 47.08
 -4 -3 5 771.15 46.47
 4 -3 -5 800.36 46.27
 4 -3 -4 106.32 8.08
 4 -3 -4 106.11 8.42
 -4 -3 4 111.42 8.36
 -4 -3 4 106.93 8.15
 -4 -3 4 106.3 7.14
 4 -3 -4 105.58 7.83
 -4 -3 4 113.26 8.74
 4 -3 -4 111.21 8.01
 4 -3 -3 689.38 43.05
 -4 -3 3 718.99 43.04
 4 -3 -3 742.2 42.62
 -4 -3 3 726.74 43.13
 -4 -3 3 752.52 43.58
 4 -3 -3 708.76 42.54
 4 -3 -3 772.24 43.32
 4 -3 -3 709.26 42.76
 4 -3 -3 738.98 42.83
 -4 -3 3 800.22 43.31
 4 -3 -2 926.17 54.79
 -4 -3 2 957.9 54.8
 -4 -3 2 1046.09 55.45
 -4 -3 2 886.71 54.5
 -4 -3 2 911.73 54.34
 -4 -3 2 982.44 54.85
 4 -3 -2 940.22 53.97
 4 -3 -2 959.32 54.29
 4 -3 -2 996.42 55.26
 -4 -3 2 886.9 54.34
 4 -3 -2 931.27 54.48
 4 -3 -2 945.79 54.45
 -4 -3 1 1349.34 79.76
 -4 -3 1 1504.94 80.21
 4 -3 -1 1470.27 80.15
 4 -3 -1 1311.3 79.64
 -4 -3 1 1277.16 79.51
 4 -3 -1 1361.1 79.43
 4 -3 -1 1408.43 79.3
 4 -3 -1 1366.47 79.4
 4 -3 -1 1401.59 79.58
 -4 -3 1 1545.79 80.77
 -4 -3 1 1396.99 79.76
 4 -3 -1 1454.91 80.69
 -4 -3 0 258.25 16.04
 -4 -3 0 250.33 16.61
 4 -3 0 257.38 16.03
 -4 -3 0 238.02 16.65
 4 -3 0 277.04 17.19
 -4 -3 0 247.47 16.05
 -4 -3 0 264.7 16.07
 4 -3 0 254.79 16.27
 4 -3 0 252.42 16.2
 4 -3 0 261.04 17.42
 -4 -3 0 260.85 16.61
 4 -3 0 267.71 16.4
 4 -3 0 239.31 16.43
 -4 -3 0 255.34 15.92
 -4 -3 0 282.34 17.42
 -4 -3 -1 44.52 4.23
 -4 -3 -1 49.52 4.85
 -4 -3 -1 45.51 5.18
 -4 -3 -1 41.58 5.15
 4 -3 1 44.91 5.19
 -4 -3 -1 46.13 5.15
 4 -3 1 48.54 4.97
 -4 -3 -1 43.23 4.03
 4 -3 1 56.19 5.66
 4 -3 1 48.92 4.86
 4 -3 2 385.94 25.15
 -4 -3 -2 427.71 26.3
 4 -3 2 413.68 27.09
 -4 -3 -2 407.3 25.72
 -4 -3 -2 428.41 24.97
 -4 -3 -2 425.64 26.2
 -4 -3 -2 414.54 25.3
 4 -3 2 420.63 26.1
 4 -3 2 433.33 25.99
 -4 -3 -2 452.51 24.99
 4 -3 2 403.83 25.34
 -4 -3 -3 72.24 5.21
 -4 -3 -3 51.22 6.37
 -4 -3 -3 66.24 6.54
 4 -3 3 67.1 6.14
 4 -3 3 67.41 6.63
 4 -3 3 67.66 5.96
 -4 -3 -3 71.64 6.28
 -4 -3 -3 65.29 6.46
 4 -3 4 112.81 9.37
 4 -3 4 146.55 11.15
 4 -3 4 142.34 10.19
 4 -3 4 153.15 11.04
 -4 -3 -4 150.39 10.67
 -4 -3 -4 150.12 10.61
 -4 -3 -4 139.45 10.63
 4 -3 4 118.51 9.77
 4 -3 5 151.1 11.31
 -4 -3 -5 157.42 12.27
 -4 -3 -5 154.76 11.83
 4 -3 5 133.79 10.42
 -4 -3 -5 159.45 11.82
 4 -3 5 153.43 11.05
 -4 -3 -5 163.82 11.62
 -4 -3 -6 23.66 5.51
 -4 -3 -6 24.43 5.6
 4 -3 6 26.29 4.16
 -4 -3 -6 22.94 5.38
 -4 -3 -6 20.88 4.69
 4 -3 6 20.67 4.53
 4 -3 6 22.42 4.6
 4 -3 7 82.15 8.15
 -4 -3 -7 93 9.34
 -4 -3 -7 83.08 8.77
 4 -3 7 79.01 8.72
 -4 -3 -7 76.78 7.98
 4 -3 7 102.93 7.56
 4 -3 7 96.86 8.09
 4 -3 8 73.66 6.55
 -4 -3 -8 67.68 7.1
 4 -3 8 67.27 7.91
 4 -3 8 66.62 7.37
 -4 -3 -8 63.31 8.01
 4 -3 8 88.85 7.67
 -4 -3 -9 79.53 8.74
 4 -3 9 86.38 6.88
 -4 -3 -9 84.98 8.67
 4 -3 9 75.79 8.02
 -4 -3 -9 86.59 7.59
 4 -3 9 83.25 8.41
 -4 -3 -10 165.92 12.45
 4 -3 10 157.79 12.16
 -4 -3 -10 149.81 12.26
 -4 -3 -10 146.72 10.71
 4 -3 10 145.42 11.7
 -4 -3 -11 9.69 4
 4 -3 11 8.03 3.78
 -4 -3 -11 9.08 4.52
 -4 -3 -12 6.05 3.17
 4 -3 12 6.16 2.63
 4 -3 13 71.51 5.63
 4 -2 -17 69.11 5.33
 4 -2 -17 55.73 5.02
 4 -2 -16 8.5 3.78
 4 -2 -16 7.09 3.35
 -4 -2 16 7.84 2.64
 4 -2 -16 11.18 3.23
 -4 -2 15 23.33 4.32
 -4 -2 15 22.69 4
 4 -2 -15 23.1 5.04
 4 -2 -15 25.88 5.66
 -4 -2 14 4.63 3.78
 4 -2 -14 0.2 5.3
 -4 -2 14 3.77 3.78
 4 -2 -14 5.29 4.76
 4 -2 -14 7.32 3.38
 -4 -2 13 194 14.16
 4 -2 -13 183.85 14.26
 -4 -2 13 179.19 13.62
 -4 -2 13 155.53 12.29
 4 -2 -13 188.65 13.08
 -4 -2 12 175.73 13.77
 4 -2 -12 168.89 13.51
 -4 -2 12 169.47 13.09
 -4 -2 12 141.7 11.75
 4 -2 -12 197.25 12.76
 4 -2 -12 158.55 12.42
 4 -2 -11 144.76 10.39
 4 -2 -11 155.79 12.22
 -4 -2 11 143.86 11.42
 4 -2 -11 159.6 11.32
 4 -2 -11 142.71 11.07
 -4 -2 11 126.77 10.36
 -4 -2 11 152.93 12.36
 -4 -2 11 120.29 10.04
 -4 -2 10 102.89 9.02
 4 -2 -10 116.51 10.54
 -4 -2 10 115.98 9.95
 4 -2 -10 117.2 9.38
 -4 -2 10 113.05 9.24
 4 -2 -10 130.41 9.84
 4 -2 -10 148.83 10.04
 -4 -2 10 149.29 11.44
 -4 -2 9 852.09 45.42
 4 -2 -9 751.01 43.73
 4 -2 -9 746.49 44.4
 -4 -2 9 719.94 44
 4 -2 -9 760.42 43.49
 -4 -2 9 676.7 43.34
 4 -2 -9 771.75 43.75
 -4 -2 9 678.86 43.3
 4 -2 -8 67.61 6.5
 -4 -2 8 96.34 6.1
 -4 -2 8 55.03 5.97
 4 -2 -8 67.64 7.09
 -4 -2 8 78.5 6.79
 -4 -2 8 71.11 6.33
 -4 -2 8 64.84 6.13
 4 -2 -8 72.35 6.56
 -4 -2 8 81.81 7.62
 -4 -2 7 67.59 6
 -4 -2 7 61.31 5.71
 4 -2 -7 66.11 6.67
 4 -2 -7 73.13 5.98
 -4 -2 7 64.02 6.05
 -4 -2 7 79.91 5.46
 -4 -2 7 69.69 6.72
 -4 -2 7 78.73 6.45
 4 -2 -7 59.87 5.75
 -4 -2 7 60.63 6.09
 4 -2 -7 64.99 6.08
 -4 -2 7 60.03 5.61
 4 -2 -6 68.4 5.23
 -4 -2 6 71.53 6.07
 4 -2 -6 71.89 6.73
 4 -2 -6 84.88 6.23
 4 -2 -6 66.96 5.95
 -4 -2 6 72.53 6.2
 -4 -2 6 84.86 5.61
 -4 -2 6 73.56 6.74
 4 -2 -6 75.89 6.32
 -4 -2 6 91.36 6.72
 -4 -2 6 76.28 6
 -4 -2 6 73.13 6.32
 4 -2 -6 73.88 5.98
 -4 -2 6 71.7 6.27
 4 -2 -6 79.64 6.17
 4 -2 -5 821.4 47.39
 -4 -2 5 789.82 47.15
 -4 -2 5 731.58 46.7
 -4 -2 5 912.3 47.64
 4 -2 -5 820.49 46.84
 -4 -2 5 894.31 47.34
 -4 -2 5 841.33 47.66
 4 -2 -5 864.97 47.23
 4 -2 -5 793.12 46.87
 -4 -2 5 740.51 47
 4 -2 -5 800.9 46.98
 -4 -2 4 463.83 25.58
 4 -2 -4 409.25 25.49
 -4 -2 4 444.22 25.86
 -4 -2 4 402.44 25.31
 -4 -2 4 443.38 25.46
 4 -2 -4 397.53 25.11
 4 -2 -3 499.55 28.17
 -4 -2 3 466.38 28.6
 4 -2 -2 900.36 49.37
 -4 -2 2 873.22 49.95
 -4 -2 2 809.88 50.13
 -4 -2 1 1095.98 59.22
 4 -2 -1 1123.74 58.07
 4 -2 -1 1174.37 60.13
 -4 -2 1 1091.48 58.88
 -4 -2 0 1878.47 106.02
 4 -2 0 1830.56 105.73
 -4 -2 0 1849.85 105.64
 4 -2 0 2026.22 107.24
 -4 -2 -1 328.16 20.75
 -4 -2 -1 337.96 20.82
 4 -2 1 351.37 20.88
 -4 -2 -1 350.25 20.36
 4 -2 1 311.31 20.09
 4 -2 1 338.87 20.3
 4 -2 1 354.13 20.74
 4 -2 1 351.88 21.71
 -4 -2 -2 221.57 13.13
 -4 -2 -2 206.52 13.4
 4 -2 2 214.37 14.44
 4 -2 2 210.34 13.6
 4 -2 2 208.8 13.49
 4 -2 2 193.29 11.82
 -4 -2 -2 223.32 13.92
 4 -2 2 226.28 14.05
 4 -2 2 221.91 14.76
 4 -2 2 204.11 13.11
 -4 -2 -2 228.39 13.89
 -4 -2 -3 182.25 12.19
 4 -2 3 181.98 11.02
 4 -2 3 177.33 12.51
 4 -2 3 192.66 13.25
 4 -2 3 180.09 12.04
 4 -2 3 186.02 13.61
 -4 -2 -3 166.43 12.35
 -4 -2 -3 232.4 11.68
 4 -2 3 171.55 12.41
 4 -2 3 197.73 12.13
 -4 -2 -3 173.52 12.22
 -4 -2 -3 164.22 12.51
 4 -2 3 172.06 11.87
 -4 -2 -4 455.87 25.97
 4 -2 4 428.12 27.23
 -4 -2 -4 447.8 26.07
 4 -2 4 435.25 26.74
 4 -2 4 429.11 25.09
 4 -2 4 410.1 24.86
 4 -2 4 426.31 25.49
 4 -2 4 360.65 24.26
 -4 -2 -4 395.62 25.26
 -4 -2 -4 424.01 25.12
 -4 -2 -4 420.79 25.51
 4 -2 4 408.69 25.66
 -4 -2 -5 857.12 47.75
 -4 -2 -5 818.89 46.86
 -4 -2 -5 873.17 47.12
 4 -2 5 805.54 46.81
 4 -2 5 711.04 45.76
 4 -2 5 872.96 47.27
 -4 -2 -5 761.03 47.02
 -4 -2 -6 56.74 6.19
 4 -2 6 47.07 4.58
 -4 -2 -6 47.53 5.03
 4 -2 6 41.57 5.41
 -4 -2 -6 49.4 6
 4 -2 6 43.16 5.06
 4 -2 6 42.49 5.03
 -4 -2 -7 180.99 13.32
 4 -2 7 172.66 13.07
 -4 -2 -7 186 13.5
 4 -2 7 181.19 11.72
 4 -2 7 166.23 12.67
 -4 -2 -7 175.23 13.33
 -4 -2 -7 169.69 12.34
 4 -2 7 186.33 12.45
 -4 -2 -8 12.49 5.09
 -4 -2 -8 7.47 3.19
 4 -2 8 14.43 3.52
 -4 -2 -8 8.08 5.21
 -4 -2 -8 7.89 3.98
 4 -2 8 9.26 4.22
 -4 -2 -9 373.58 24.19
 4 -2 9 343.71 23.78
 -4 -2 -9 313.65 22.33
 4 -2 10 9.22 4.53
 -4 -2 -10 8.98 4.69
 4 -2 10 14.13 3.6
 4 -2 10 10.2 4.11
 -4 -2 -11 76.61 7.69
 4 -2 11 71.91 7.55
 4 -2 11 62.02 6.7
 -4 -2 -11 71.1 8.07
 -4 -2 -12 67.42 6.55
 -4 -2 -12 71.66 6.38
 4 -2 12 71.53 6.7
 -4 -2 -12 70.95 7.18
 4 -2 12 51.07 5.6
 4 -2 12 61.54 5.92
 4 -2 13 30.94 4.07
 -4 -2 -13 29.98 3.82
 4 -2 13 30.77 3.66
 -4 -2 -13 37.52 4.69
 -4 -2 -13 35.1 3.98
 4 -2 14 27.85 3.09
 -4 -2 -14 36.32 3.76
 4 -1 -17 3.7 2.93
 4 -1 -17 2.14 3.09
 -4 -1 17 3.95 2.49
 -4 -1 17 6.28 2.52
 -4 -1 17 3.51 2.26
 4 -1 -16 10.09 4.25
 4 -1 -16 9.56 4.38
 -4 -1 16 6.57 3.38
 -4 -1 16 8.02 3.44
 -4 -1 16 5.26 3.56
 4 -1 -15 23.3 6.2
 -4 -1 15 18.46 4.59
 4 -1 -15 20.4 5.57
 -4 -1 15 18.62 4.62
 4 -1 -14 19.19 5.92
 -4 -1 14 10.24 4.38
 -4 -1 14 15.74 4.6
 4 -1 -14 17.79 6.26
 4 -1 -14 10.89 3.39
 4 -1 -13 177.71 13.25
 4 -1 -13 194.31 14.24
 -4 -1 13 160.67 12.69
 -4 -1 13 135.95 10.71
 4 -1 -13 146.76 11.24
 4 -1 -13 163.6 11.35
 -4 -1 13 171.83 12.9
 4 -1 -12 22.34 5.72
 -4 -1 12 16.19 3.13
 -4 -1 12 20.99 3.45
 -4 -1 12 20.92 4.77
 4 -1 -12 18.5 6.73
 4 -1 -12 18.61 4.09
 -4 -1 12 21.52 5.04
 4 -1 -12 19.67 3.85
 -4 -1 12 18.72 3.25
 4 -1 -11 132 9.88
 -4 -1 11 96.7 7.94
 -4 -1 11 92.24 7.79
 4 -1 -11 100.53 8.47
 -4 -1 11 102.66 8
 -4 -1 11 98.39 8.87
 -4 -1 11 120.46 9.43
 4 -1 -11 104.92 10.27
 4 -1 -11 108.38 8.39
 -4 -1 11 107.85 9.27
 4 -1 -10 14.4 3.38
 -4 -1 10 11.1 3.64
 -4 -1 10 13.18 2.98
 -4 -1 10 14.44 3.63
 4 -1 -10 11.85 5.15
 -4 -1 10 13.71 2.84
 -4 -1 10 16.52 3.69
 -4 -1 10 11.35 2.73
 4 -1 -10 11.14 3.3
 4 -1 -10 17.07 3.86
 -4 -1 9 219.29 15.2
 -4 -1 9 225.19 15.36
 4 -1 -9 242.74 16.69
 -4 -1 9 253.78 16.15
 -4 -1 9 236.16 16.11
 4 -1 -9 238.55 15.55
 -4 -1 9 231.14 15.36
 -4 -1 9 271.21 16.46
 4 -1 -9 279.23 15.78
 4 -1 -9 250.58 15.62
 4 -1 -9 247.33 16.05
 4 -1 -8 453.61 26.47
 4 -1 -8 457.61 26.18
 -4 -1 8 419.15 26.37
 4 -1 -8 451.41 27.39
 -4 -1 8 421.48 26.82
 -4 -1 8 421.04 26.33
 -4 -1 8 485.96 27.84
 4 -1 -8 452.91 27.35
 4 -1 -8 431.03 26.44
 4 -1 -8 431.24 26.44
 -4 -1 8 430.14 28.66
 -4 -1 8 498.45 27.2
 -4 -1 8 400.66 26.76
 4 -1 -8 512.89 26.73
 -4 -1 8 402.7 26.22
 4 -1 -8 468.1 27.09
 4 -1 -7 692.48 38.71
 4 -1 -7 675.79 37.66
 4 -1 -7 704.11 37.42
 -4 -1 7 574.56 37.9
 -4 -1 7 620.32 37.65
 4 -1 -7 657.98 38.4
 -4 -1 7 584.08 37.87
 4 -1 -7 611.43 37.59
 -4 -1 7 661.8 39.79
 -4 -1 7 616.36 37.58
 -4 -1 7 704.78 38.9
 -4 -1 7 702.13 38.63
 4 -1 -7 646.1 37.96
 4 -1 -7 662.45 38.19
 -4 -1 7 674.22 38.14
 4 -1 -7 651.48 38.48
 4 -1 -7 715.52 37.88
 4 -1 -7 640.84 37.68
 -4 -1 7 596.55 37.45
 4 -1 -6 780.2 42.58
 4 -1 -6 716.18 43.48
 -4 -1 6 757.13 44.78
 4 -1 -6 703.6 42.1
 -4 -1 6 750.39 43.29
 4 -1 -6 741.94 42.84
 -4 -1 6 767.95 43.6
 4 -1 -6 760.35 43.62
 -4 -1 6 824.65 43.99
 4 -1 -6 775.12 43.5
 4 -1 -5 275.82 15.92
 4 -1 -5 276.66 16.89
 -4 -1 5 294.01 17.26
 -4 -1 5 271.29 16.84
 4 -1 -5 266.87 15.65
 4 -1 -5 274.81 16.89
 -4 -1 4 1080.34 58.93
 -4 -1 4 983 58.47
 4 -1 -4 1032.62 58.6
 4 -1 -4 1019.8 58.69
 4 -1 -3 1007.91 54.99
 4 -1 -3 915.96 54.18
 -4 -1 3 994.86 55.23
 4 -1 -3 1008.72 54.94
 4 -1 -3 982.76 54.75
 -4 -1 3 953.43 55.11
 4 -1 -3 970.95 55.2
 4 -1 -2 968.15 50.84
 4 -1 -2 896.24 51.65
 -4 -1 2 926.54 51.74
 4 -1 -2 827.11 51.45
 -4 -1 2 893.78 51.71
 4 -1 -2 814.61 51.41
 4 -1 -1 362.72 22.96
 4 -1 -1 408.62 22.41
 -4 -1 1 381.1 22.27
 -4 -1 1 409.06 23.09
 4 -1 0 376.66 22.57
 4 -1 0 386.96 22.52
 -4 -1 0 407.59 22.74
 4 -1 1 676.05 39.41
 -4 -1 -1 698.55 39.49
 4 -1 1 665.73 39.15
 -4 -1 -1 705.9 39.26
 4 -1 2 379.66 27.87
 4 -1 2 427.52 26.73
 -4 -1 -2 475.11 26.92
 -4 -1 -2 476.76 27.09
 -4 -1 -2 523.82 27.56
 -4 -1 -2 475.19 26.83
 4 -1 3 2058.58 130.19
 -4 -1 -3 2309.54 129.72
 -4 -1 -3 2402.66 130.41
 -4 -1 -3 2370.35 130.05
 4 -1 3 2426.37 131.49
 -4 -1 -3 2297.67 130.01
 -4 -1 -4 767.89 41.82
 -4 -1 -4 743.61 41.52
 4 -1 4 662.85 40.59
 -4 -1 -4 787.01 41.94
 4 -1 4 728.36 43
 4 -1 4 626.99 41.11
 -4 -1 -4 769.27 41.72
 4 -1 4 629.12 41.48
 -4 -1 -4 702.47 41.49
 4 -1 4 686.97 40.7
 4 -1 4 646.6 40.57
 4 -1 4 706.27 40.83
 -4 -1 -4 780.83 41.51
 4 -1 4 700.55 41.1
 -4 -1 -4 748.01 41.1
 4 -1 4 681.75 41.07
 -4 -1 -4 760.45 41.44
 4 -1 4 714.61 40.86
 -4 -1 -4 749.88 41.42
 -4 -1 -5 173.26 11.2
 4 -1 5 163.7 10.01
 -4 -1 -5 177.34 11.58
 -4 -1 -5 174.07 11.51
 4 -1 5 170.55 11.01
 4 -1 5 143.1 11.23
 -4 -1 -5 148.68 11.29
 -4 -1 -5 169.07 11.5
 4 -1 5 146 10.35
 4 -1 5 164.82 12.77
 -4 -1 -5 162.95 11.42
 4 -1 5 153.34 10.56
 -4 -1 -5 172.22 11.66
 4 -1 5 156.39 10.61
 -4 -1 -5 170.55 11.32
 4 -1 5 148.25 10.23
 -4 -1 -5 162.14 10.81
 -4 -1 -5 184.66 11.32
 -4 -1 -5 168.63 10.64
 4 -1 5 166.34 10.58
 4 -1 5 167.58 11
 -4 -1 -5 148.48 11.01
 4 -1 6 571.07 32.18
 -4 -1 -6 587.44 34.29
 -4 -1 -6 591.39 33.75
 4 -1 6 609.8 32.92
 4 -1 6 542.85 33.46
 -4 -1 -6 549.46 33.8
 -4 -1 -6 569.97 33.94
 4 -1 6 534.13 33.03
 4 -1 6 497.07 32.55
 4 -1 7 7.63 2.03
 -4 -1 -7 6.67 3.98
 4 -1 7 7.57 2.74
 4 -1 7 9.51 2.41
 4 -1 7 8.19 3.16
 -4 -1 -7 9.14 3.11
 -4 -1 -8 51.94 5.36
 -4 -1 -8 44.53 6.11
 -4 -1 -8 46.84 5.54
 4 -1 8 43.45 5.4
 4 -1 8 39.98 4.28
 4 -1 8 50.15 5.59
 4 -1 9 29.93 3.92
 -4 -1 -9 42.2 6.02
 4 -1 9 41.24 5.55
 -4 -1 -9 41.15 5.38
 4 -1 9 27.68 4.68
 -4 -1 -9 42.15 6.51
 -4 -1 -10 405.22 23.95
 4 -1 10 353.7 22.91
 -4 -1 -10 369.2 22.97
 4 -1 10 311.83 22.1
 4 -1 10 400.22 23.73
 -4 -1 -10 360.73 24.06
 -4 -1 -11 175.61 12.23
 4 -1 11 163.27 12.22
 -4 -1 -11 184.07 13.19
 -4 -1 -12 8.85 3.22
 -4 -1 -12 9.27 4.79
 4 -1 12 7.92 3.52
 4 -1 13 83.52 7.53
 4 -1 13 83.36 7.25
 -4 -1 -14 44.59 4.48
 4 -1 14 31.97 3.87
 4 -1 14 34.13 3.5
 -4 -1 -14 42.51 4.22
 4 0 -18 -0.64 1.88
 -4 0 18 0.92 1.5
 4 0 -18 1.07 1.61
 -4 0 17 48.15 5.25
 -4 0 17 49.83 5.04
 -4 0 17 42.44 4.37
 4 0 -17 34.78 5.29
 4 0 -17 46.76 4.78
 4 0 -16 184.04 12.42
 4 0 -16 180.73 13.34
 4 0 -16 150.73 11.19
 -4 0 16 184.45 12.42
 4 0 -15 12.03 4.74
 4 0 -15 11.75 6.63
 -4 0 15 7.46 2.6
 4 0 -15 16.75 3.71
 -4 0 15 10.18 3.85
 -4 0 14 8.65 4.24
 4 0 -14 15.23 5.51
 -4 0 14 6.04 2.69
 -4 0 14 11.07 4.18
 4 0 -14 13.65 4.11
 -4 0 14 5.64 2.76
 -4 0 13 662.51 36.2
 -4 0 13 524.3 34.49
 4 0 -13 606.97 35.08
 -4 0 13 546.77 35.67
 -4 0 13 576.83 34.75
 4 0 -12 233.17 17.43
 -4 0 12 271.34 17.16
 -4 0 12 262.03 17.1
 4 0 -12 261.07 17.64
 -4 0 12 247.7 17.95
 -4 0 12 316.79 18.62
 4 0 -11 289.4 20.32
 4 0 -11 316.09 20.42
 -4 0 11 300.04 19.8
 -4 0 11 322.87 20.73
 -4 0 11 302.71 20.62
 -4 0 11 363.95 21.15
 -4 0 11 307.18 19.9
 4 0 -11 350.09 19.87
 4 0 -10 147.87 10.98
 -4 0 10 157.22 10.48
 -4 0 10 147.45 10.92
 -4 0 10 146.47 10.9
 -4 0 10 148.74 10.3
 4 0 -10 146.36 10.95
 4 0 -9 572.48 35.74
 4 0 -9 543.26 33.72
 4 0 -9 535.27 34
 4 0 -9 555.31 34.39
 4 0 -9 591.93 33.92
 4 0 -9 583.34 34.78
 -4 0 9 556.69 34.02
 -4 0 9 585.86 33.62
 -4 0 9 598.61 33.64
 -4 0 9 591.59 35.79
 4 0 -8 7.02 3.33
 -4 0 8 3.79 1.98
 4 0 -8 8.63 2.55
 -4 0 8 7.97 2.09
 4 0 -8 8.76 2.21
 -4 0 8 7.75 2.57
 4 0 -8 7.73 3.16
 4 0 -8 8.8 2.06
 -4 0 8 9.48 2.41
 4 0 -8 9.82 3.83
 4 0 -8 8.12 2.46
 -4 0 8 6.4 2
 -4 0 8 6.88 2.79
 -4 0 8 8.56 2.6
 4 0 -8 7.28 2.84
 -4 0 7 63.99 5.3
 4 0 -7 57.29 4.88
 -4 0 7 54.99 4.39
 4 0 -7 55.65 5.5
 4 0 -7 54.58 5.78
 4 0 -7 53.91 4.97
 -4 0 7 51.63 5.25
 -4 0 7 54.21 5.54
 4 0 -7 53.33 5.24
 4 0 -7 48.07 4.8
 -4 0 7 50.42 4.34
 -4 0 7 55 4.7
 4 0 -6 492.6 32.27
 -4 0 6 559.63 32.73
 -4 0 6 577.4 32.35
 4 0 -6 580.61 32.1
 -4 0 6 502.41 32.37
 -4 0 5 145.71 9.93
 4 0 -5 142.55 9.66
 4 0 -5 149.15 10.09
 4 0 -5 157.51 10.1
 -4 0 4 118.05 7.57
 4 0 -4 118.6 7.99
 4 0 -4 110.4 7.95
 4 0 -4 107.49 7.9
 -4 0 4 103.73 7.81
 4 0 -4 118.2 7.65
 -4 0 3 2205.68 124.99
 4 0 -3 2079.15 125.31
 4 0 -3 2321.75 124.8
 4 0 -2 551.58 30.93
 -4 0 2 532.72 30.75
 4 0 -2 525.03 30.49
 -4 0 2 524.77 30.85
 -4 0 1 78.78 5.4
 4 0 -1 82.42 5.9
 4 0 -1 71.55 5.82
 4 0 -1 78.64 5.32
 -4 0 1 77.61 5.36
 -4 0 1 87.81 5.8
 4 0 0 391.27 26.55
 4 0 0 450.88 26.22
 -4 0 0 478.76 26.56
 -4 0 0 481.06 26.27
 4 0 1 1820.37 98.51
 4 0 1 1622.68 98.44
 4 0 1 1740.51 98.64
 -4 0 -1 1730.39 98.8
 -4 0 -1 1848.74 98.95
 4 0 2 1666.48 91.79
 4 0 2 1620.49 91.87
 -4 0 -2 1626.33 92.23
 4 0 2 1519.46 91.69
 4 0 2 1658.06 92.41
 -4 0 -2 1667.44 92.16
 4 0 3 7.16 2.05
 4 0 3 5.5 1.87
 4 0 3 6.21 1.8
 -4 0 -3 3.76 1.63
 -4 0 -3 5.16 2.41
 -4 0 -3 5.28 2.07
 4 0 3 4.82 2.22
 4 0 4 621.22 36.25
 4 0 4 567.76 35.27
 4 0 4 589.84 35.74
 -4 0 -4 553.14 35.81
 4 0 4 630.77 35.35
 -4 0 -4 626.62 36.72
 4 0 4 627.04 36.16
 4 0 4 617.31 35.33
 -4 0 -4 608.84 36.38
 -4 0 -4 642.44 35.52
 -4 0 -4 629.56 36.45
 4 0 4 640.03 35.58
 4 0 5 277.57 21.08
 -4 0 -5 384.84 21.02
 4 0 5 344.35 22.36
 -4 0 -5 340.24 20.98
 4 0 5 313.31 20.89
 4 0 5 354.68 20.4
 -4 0 -5 328.64 21.88
 -4 0 -5 342.05 20.72
 4 0 5 335.97 20.43
 4 0 5 335.63 20.47
 4 0 5 331.16 21.35
 -4 0 -5 341.5 21.78
 -4 0 -5 289.24 20.89
 4 0 5 346.36 20.71
 -4 0 -5 325.77 21.56
 4 0 6 6.22 2.77
 -4 0 -6 6.9 3.44
 -4 0 -6 7.59 2.5
 -4 0 -6 6.62 3.72
 4 0 6 5.56 2.43
 -4 0 -6 8.16 2.49
 -4 0 -6 6.62 3
 4 0 6 6.62 2.14
 4 0 6 6.34 2.24
 -4 0 -6 5.45 3.25
 -4 0 -6 5.95 3.54
 4 0 6 6.84 2.06
 4 0 6 6.04 3.02
 4 0 7 24.16 3.5
 -4 0 -7 30.4 5.1
 -4 0 -7 20.56 4.48
 -4 0 -7 25.62 5.07
 4 0 7 21.52 3.12
 -4 0 -7 23.62 4.93
 -4 0 -7 20.84 4.18
 -4 0 -8 5.39 4.88
 4 0 8 2.3 2.08
 -4 0 -8 8.64 5.03
 4 0 8 2.46 2.72
 4 0 8 3.26 1.86
 4 0 8 1.4 2.47
 -4 0 -8 3.3 3.95
 4 0 8 -0.98 2.81
 -4 0 -8 0.89 3.71
 -4 0 -8 4.63 4.15
 -4 0 -8 10.54 4.97
 -4 0 -9 8.64 6.08
 -4 0 -9 2.23 3.65
 4 0 9 1.15 2.51
 4 0 9 0.14 2.77
 -4 0 -9 9.52 5.49
 -4 0 -9 2.37 4.92
 4 0 9 0.18 3.03
 -4 0 -9 1.56 4.1
 4 0 9 1.36 2.4
 4 0 9 0.92 1.95
 4 0 9 -1.05 2
 -4 0 -9 2.5 4.5
 4 0 10 43.75 4.45
 -4 0 -10 54.73 5.94
 4 0 10 43.89 4.63
 -4 0 -10 55.36 7.2
 -4 0 -10 54.44 6.42
 -4 0 -10 41.07 6.35
 4 0 10 35.95 4.73
 4 0 10 50.83 5.84
 -4 0 -11 52.27 7.09
 -4 0 -11 55.08 6.84
 4 0 11 56.04 5.63
 4 0 11 52.46 5.87
 4 0 11 45.87 4.66
 -4 0 -11 45.81 5.4
 4 0 12 -0.47 2.73
 -4 0 -12 -2.26 4.05
 4 0 12 1.24 2.48
 -4 0 -12 0.38 4.24
 -4 0 -13 13.46 4.1
 4 0 13 13.16 2.63
 -4 0 -13 10.47 3.87
 4 0 13 14.92 3.07
 4 0 14 262.16 16.73
 -4 0 -14 294.58 16.22
 -4 0 -15 2.82 1.85
 4 0 15 1.18 1.44
 -4 1 17 3.64 1.58
 -4 1 17 4.87 2.5
 4 1 -17 4.05 2.09
 4 1 -17 9.16 3.72
 4 1 -17 3.51 1.94
 -4 1 16 7.91 3.45
 -4 1 16 8.38 3.59
 4 1 -16 8.31 3.18
 -4 1 16 8.59 2.61
 -4 1 16 7.06 2.34
 4 1 -16 4.47 5.26
 -4 1 16 7.2 2.65
 4 1 -16 8.42 3.39
 4 1 -15 24.61 4.68
 -4 1 15 20.78 3.43
 -4 1 15 16.5 4.58
 4 1 -15 20.32 6.96
 4 1 -15 24.74 4.9
 -4 1 15 18.53 4.86
 -4 1 15 19.03 3.81
 -4 1 15 22.37 3.74
 4 1 -14 8.82 5.21
 -4 1 14 13.81 4.98
 4 1 -14 20.81 7.51
 -4 1 14 13.11 3.45
 -4 1 14 14.19 3.44
 -4 1 14 13.14 3.65
 4 1 -14 9.29 5.3
 -4 1 14 15.79 4.55
 4 1 -13 164.57 13.56
 -4 1 13 175.56 12.64
 -4 1 13 174.65 12.68
 4 1 -13 178.54 15.22
 -4 1 13 171.71 13.3
 -4 1 13 170.36 12.99
 4 1 -13 178.48 13.77
 4 1 -13 210.61 12.91
 4 1 -12 26.9 6.52
 -4 1 12 20.62 3.81
 -4 1 12 26.22 4.6
 4 1 -12 26.48 7.18
 4 1 -12 23.7 6.47
 -4 1 12 17.36 3.91
 -4 1 12 22.91 3.91
 -4 1 11 122.49 9.19
 4 1 -11 125.14 11.42
 4 1 -11 132.93 10.84
 -4 1 11 108.46 9.38
 -4 1 11 129.03 9.19
 4 1 -11 130.83 10.73
 -4 1 11 109.18 9.06
 4 1 -10 15.79 5.62
 4 1 -10 16.87 5.67
 -4 1 10 14.28 3.37
 -4 1 10 18.02 3.25
 -4 1 10 14.35 3.42
 -4 1 10 13.77 3.22
 4 1 -10 16.13 5.14
 -4 1 10 15.34 2.9
 4 1 -9 299.57 18.56
 -4 1 9 271.71 17.76
 4 1 -9 308.37 18.19
 4 1 -9 272.18 18.49
 -4 1 9 254.4 17.46
 4 1 -9 308.27 19
 -4 1 9 266.35 17.34
 4 1 -9 292.49 18.07
 -4 1 9 264.24 17.27
 4 1 -8 514.71 28.29
 -4 1 8 428.89 26.94
 4 1 -8 458 28.2
 -4 1 8 449.42 27.93
 4 1 -8 454.57 29.57
 4 1 -8 489.98 28.11
 -4 1 8 443.43 27.17
 -4 1 8 489.77 27.56
 -4 1 8 495.83 28.06
 4 1 -8 361.82 28.07
 4 1 -8 484.36 28.47
 4 1 -8 465.43 27.78
 -4 1 8 427.03 28.6
 -4 1 7 645.67 38.79
 4 1 -7 648.94 40.38
 -4 1 7 627.46 38.08
 4 1 -7 634.78 38.75
 -4 1 7 633.9 39.68
 4 1 -7 665.96 39.19
 4 1 -7 642.61 39.49
 4 1 -7 699.93 38.93
 -4 1 7 647.66 38.25
 -4 1 7 726.51 38.62
 -4 1 7 731.48 39.11
 4 1 -7 661.77 39.3
 4 1 -7 630.49 38.58
 4 1 -6 766.03 43.82
 4 1 -6 741.89 44.01
 -4 1 6 721.7 43.19
 -4 1 6 812.71 43.66
 4 1 -6 720.52 43.84
 4 1 -6 740.23 44.92
 4 1 -6 724.53 44.49
 4 1 -5 271.59 17.32
 -4 1 5 301.75 17.28
 4 1 -5 280.21 17.57
 4 1 -5 276.75 17.52
 4 1 -5 256.47 17.93
 -4 1 4 1093.78 59.82
 -4 1 4 1043.82 60.33
 4 1 -4 981.12 61.1
 -4 1 3 987.1 58.03
 4 1 -3 955.12 58.78
 -4 1 3 990.14 58.06
 4 1 -3 1087.3 58.29
 -4 1 3 1042.17 57.62
 -4 1 2 862.67 49.14
 -4 1 2 898.01 49.93
 4 1 -2 859.71 49.75
 4 1 -1 411.45 22.84
 4 1 -1 381.94 22.49
 -4 1 1 359.23 22.05
 -4 1 1 378.37 22.81
 -4 1 1 399.36 22.49
 4 1 0 379.08 22.41
 -4 1 0 344.21 21.97
 4 1 0 407.38 22.72
 -4 1 0 395.35 22.52
 4 1 0 399.14 22.31
 -4 1 0 362.09 22.52
 4 1 1 704.01 39.5
 4 1 1 657.62 38.44
 -4 1 -1 658.83 39.37
 -4 1 -1 711.23 39.49
 4 1 2 427.38 25.6
 -4 1 -2 443.58 26.68
 4 1 2 443.14 26.06
 4 1 2 471.62 26.75
 4 1 3 2404.99 113.17
 -4 1 -3 2209.57 113.77
 4 1 3 2110.78 113.16
 4 1 3 2284.83 112.9
 4 1 4 790.48 44.2
 -4 1 -4 726.34 44.83
 -4 1 -4 664.72 43.27
 4 1 4 752.99 43.58
 4 1 4 757.08 44.32
 -4 1 -4 804.84 43.64
 4 1 4 788.83 43.27
 4 1 5 186.14 12.09
 4 1 5 171.67 11.39
 -4 1 -5 158.43 12.18
 4 1 5 173.45 10.95
 4 1 5 173.99 11.06
 -4 1 -5 162.02 11.3
 -4 1 -5 141.55 10.94
 4 1 5 160.78 12
 4 1 5 186.29 11.31
 -4 1 -5 183.07 11.42
 -4 1 -6 679.42 36.06
 4 1 6 569.42 35.48
 4 1 6 610.97 35.24
 -4 1 -6 537.7 35.41
 4 1 6 607.58 35.42
 4 1 6 604.35 35.17
 -4 1 -7 6.58 4.23
 -4 1 -7 11.37 3.5
 4 1 7 8.31 2.75
 4 1 7 10.8 3.38
 4 1 7 7.4 2.61
 -4 1 -7 7.6 4.09
 4 1 7 7.49 2.83
 4 1 7 12.32 3.07
 -4 1 -8 60.88 7.41
 -4 1 -8 54.89 7.74
 4 1 8 45.11 4.99
 4 1 8 51.59 5.38
 -4 1 -8 42.4 6.24
 -4 1 -8 42.55 5.37
 4 1 8 51.65 5.37
 4 1 8 50.25 5.24
 -4 1 -9 48.4 7.47
 -4 1 -9 39.16 6.8
 -4 1 -9 21.68 7.07
 4 1 9 37.89 4.9
 -4 1 -9 20.36 5.5
 4 1 9 32 4.34
 4 1 9 37.91 5.11
 -4 1 -9 28.13 6.36
 4 1 9 43.39 4.72
 4 1 10 393.91 23.59
 4 1 10 420.58 23.55
 -4 1 -10 347.47 25.02
 -4 1 -10 343.04 24.36
 -4 1 -10 417.51 25.42
 4 1 10 442.08 24.14
 4 1 10 376.43 23.93
 -4 1 -10 324.08 24.29
 -4 1 -10 288.01 24.54
 4 1 11 185.11 12.42
 -4 1 -11 183.79 14.42
 4 1 11 187.63 12.94
 4 1 11 171.38 12.31
 4 1 11 194.53 12.78
 -4 1 -11 160.01 13.11
 -4 1 -11 178.66 13.9
 4 1 12 8.65 2.64
 4 1 12 9.09 2.76
 -4 1 -12 7.99 3.64
 -4 1 -12 8.55 5.39
 4 1 12 9.5 3.28
 -4 1 -13 84.04 6.82
 -4 1 -13 103.47 8.72
 4 1 13 92.96 7.23
 4 1 13 73.25 6.35
 -4 1 -14 47.75 5.12
 4 1 14 43.25 4.25
 4 2 -17 62.27 4.65
 4 2 -17 51.34 5.13
 -4 2 17 62.7 4.82
 4 2 -16 16.67 3.53
 -4 2 16 10.72 2.62
 4 2 -16 11.87 4.45
 -4 2 16 9.42 2.55
 -4 2 16 6.67 2.67
 4 2 -15 21.46 5.57
 -4 2 15 28.1 4.79
 -4 2 15 32 4.19
 -4 2 15 29.19 4.45
 4 2 -15 26.35 6.2
 -4 2 15 35.34 3.6
 -4 2 15 24.57 3.7
 4 2 -15 27.14 5.63
 4 2 -15 27.63 3.91
 4 2 -14 10 5.6
 4 2 -14 9.63 5.75
 -4 2 14 6.96 3.24
 -4 2 14 9.56 3.99
 4 2 -14 9.78 5.9
 -4 2 14 7.05 3.36
 -4 2 14 4.95 3.37
 4 2 -13 208.13 15.56
 -4 2 13 233.66 14.59
 4 2 -13 214.35 15.99
 -4 2 13 182.16 13.74
 -4 2 13 195.1 14.44
 -4 2 13 211.05 15.07
 4 2 -13 235.78 15.59
 -4 2 13 219.12 14.39
 -4 2 13 175.9 13.95
 4 2 -12 197.52 14.27
 4 2 -12 180.63 14.14
 -4 2 12 160.6 12.37
 -4 2 12 197.22 12.94
 4 2 -12 173.24 14.25
 -4 2 12 157.61 12.55
 -4 2 12 180.73 13.32
 4 2 -11 173.6 13.14
 -4 2 11 137.1 10.86
 4 2 -11 164.98 13.02
 -4 2 11 137.43 11.04
 -4 2 11 154.55 11.68
 4 2 -11 155.25 12.82
 -4 2 10 121.38 9.48
 4 2 -10 143.32 12.18
 4 2 -10 123.88 10.81
 -4 2 10 124.42 9.59
 -4 2 10 146.51 10.3
 4 2 -10 138.41 11.26
 -4 2 10 139.7 9.74
 -4 2 9 751.32 43.08
 4 2 -9 603.94 43.81
 4 2 -9 760.96 44.16
 -4 2 9 752.22 43.2
 -4 2 9 864.32 43.89
 4 2 -9 688.29 43.78
 -4 2 8 74.52 5.82
 4 2 -8 65.36 7.57
 4 2 -8 69.53 6.96
 4 2 -8 82.15 7.19
 -4 2 8 74.42 5.92
 4 2 -8 70.7 6.53
 -4 2 8 92.41 6.55
 -4 2 7 70.72 5.19
 4 2 -7 72.2 6.37
 4 2 -7 60.99 6.53
 4 2 -7 68.95 6.09
 -4 2 7 66.21 5.14
 -4 2 7 76.47 5.69
 4 2 -7 59.8 6.08
 4 2 -7 67.04 6.36
 -4 2 7 64.48 5.3
 4 2 -7 63.13 5.81
 4 2 -6 75.55 6.66
 -4 2 6 81.85 5.56
 -4 2 6 77.95 5.82
 4 2 -6 73.84 6.37
 4 2 -6 80.38 6.67
 4 2 -6 73.22 7.53
 4 2 -5 895.27 50.24
 -4 2 5 904.4 49.42
 4 2 -5 832.73 51.29
 4 2 -5 783.79 49.86
 4 2 -4 452.38 27.27
 -4 2 4 454.03 26.65
 -4 2 3 516.74 28.63
 -4 2 3 482.35 28.1
 4 2 -3 425.2 29.47
 -4 2 3 477.01 27.23
 -4 2 3 469.98 28.21
 4 2 -3 503.17 28.63
 -4 2 2 878.53 46.86
 4 2 -2 779.44 47.86
 -4 2 2 781.2 45.53
 -4 2 2 799.3 46.65
 4 2 -2 853.01 46.72
 4 2 -2 811.95 46.38
 -4 2 1 1143.32 64.78
 -4 2 1 1082.76 64.48
 4 2 -1 1137.45 64.68
 -4 2 1 1058.05 64.8
 4 2 -1 1150.32 64.64
 4 2 -1 1109.72 64.19
 -4 2 1 1150.01 64.17
 4 2 -1 1224.49 64.91
 4 2 0 2015.93 109.19
 4 2 0 2049.3 109.2
 4 2 0 1902.97 108.73
 -4 2 0 1879.58 109.08
 4 2 0 1948.89 108.9
 -4 2 0 1841.15 108.77
 -4 2 0 1855.88 109.36
 4 2 1 323.63 19.62
 4 2 1 348.77 20.23
 -4 2 -1 312.33 20.11
 4 2 1 333.17 20.18
 4 2 1 340.42 19.88
 -4 2 -1 340.19 20.42
 4 2 1 316.97 19.03
 4 2 2 215.91 13.04
 -4 2 -2 201 13.27
 -4 2 -2 198.94 12.24
 -4 2 -2 206.67 13.23
 4 2 2 181.81 11.22
 4 2 2 234.09 13.25
 -4 2 -3 174.21 12.9
 4 2 3 212.56 12.56
 -4 2 -3 175.12 11.92
 4 2 3 166.79 11.06
 4 2 3 190.49 12.69
 -4 2 -3 193.79 11.76
 4 2 3 211.81 11.92
 -4 2 -4 399.18 25.49
 -4 2 -4 436.52 26.82
 4 2 4 451.13 25.45
 -4 2 -4 386.08 27.07
 -4 2 -4 395.45 26.02
 4 2 4 429.42 25.69
 4 2 4 443.47 26.89
 -4 2 -4 483.39 26.03
 4 2 4 469.03 26.59
 -4 2 -5 829.79 45.16
 4 2 5 800.67 44.9
 -4 2 -5 666.04 44.47
 4 2 5 823.02 44.6
 4 2 6 46.54 4.33
 4 2 6 41.55 4.52
 4 2 6 44.19 4.52
 -4 2 -6 48.56 5.26
 4 2 6 47.97 4.63
 -4 2 -6 51.48 5.36
 -4 2 -7 151.97 12.34
 4 2 7 177.9 11.97
 4 2 7 195.37 12.34
 -4 2 -7 173.59 12.66
 4 2 7 186.06 12.24
 4 2 8 6.23 3.07
 4 2 8 9.64 3.23
 -4 2 -8 6.38 4.14
 4 2 8 10.63 3
 4 2 8 7.73 2.95
 -4 2 -8 12.04 4.53
 4 2 9 378.9 22.3
 -4 2 -9 318.59 22.42
 -4 2 -9 322.45 22.66
 4 2 9 351.5 22.13
 4 2 9 337.24 22
 -4 2 -10 6.97 7.58
 4 2 10 15.82 3.79
 -4 2 -10 16.26 4.31
 4 2 10 14.05 3.65
 -4 2 -10 3.9 6.05
 4 2 10 9.38 3.24
 -4 2 -10 7.01 6.23
 4 2 11 79.65 6.48
 -4 2 -11 70.93 9.72
 4 2 11 82.74 7.05
 -4 2 -11 56.42 8.52
 4 2 11 68.63 6.58
 4 2 11 84.76 7.04
 -4 2 -11 52.57 6.29
 -4 2 -11 55.06 8.13
 -4 2 -12 84.28 8.77
 4 2 12 83.77 7.08
 -4 2 -12 79.14 8.36
 4 2 12 72.9 6.46
 4 2 12 79.75 6.82
 -4 2 -13 46.02 6.01
 4 2 13 32.86 3.62
 4 2 13 32.06 3.98
 4 2 13 33.95 3.77
 4 2 13 32.76 3.13
 -4 2 -14 29.04 4.18
 4 2 14 38.75 3.61
 -4 3 16 87.93 6.2
 -4 3 16 82.63 6.46
 -4 3 16 89.07 5.8
 -4 3 16 89.57 6.25
 4 3 -16 74.46 6.26
 4 3 -16 90.55 6.48
 4 3 -15 152.41 11.14
 -4 3 15 163.08 10.62
 4 3 -15 144.16 11.02
 -4 3 15 131.74 10.23
 -4 3 15 155.47 10.99
 4 3 -15 167.2 11.22
 4 3 -15 173.22 10.67
 -4 3 14 72.55 6
 -4 3 14 53.89 5.55
 4 3 -14 67.06 7.48
 -4 3 14 51.57 5.35
 4 3 -14 46.79 6.59
 -4 3 14 54.91 5.94
 4 3 -14 61.67 7.4
 4 3 -13 12.39 4.8
 4 3 -13 9.19 6.33
 -4 3 13 7.42 2.88
 -4 3 13 7.31 3.46
 -4 3 13 6.73 3.68
 -4 3 13 6.67 2.78
 -4 3 13 8.53 3.16
 -4 3 12 152.26 11.87
 4 3 -12 194.19 13.61
 -4 3 12 164.94 12.09
 -4 3 12 180.14 12.85
 -4 3 12 185.92 12.48
 -4 3 11 182 13.13
 4 3 -11 222.74 15.62
 4 3 -11 195.81 14.47
 -4 3 11 170.52 13.06
 -4 3 11 201.9 13.9
 -4 3 11 207.59 13.58
 4 3 -11 205.18 14.59
 -4 3 10 288.3 17.85
 4 3 -10 245.93 19.24
 4 3 -10 290.82 18.98
 -4 3 10 272.85 17.85
 -4 3 10 303.41 18.58
 4 3 -10 269.04 18.82
 -4 3 9 89.14 6.8
 4 3 -9 69.5 8.69
 4 3 -9 90.67 8.01
 -4 3 9 85.64 6.7
 -4 3 9 91.43 7.37
 4 3 -9 69.09 7.73
 -4 3 8 233.09 14.02
 4 3 -8 201.61 15.19
 4 3 -8 207.26 14.74
 4 3 -8 182.99 14.53
 -4 3 7 115.9 7.81
 4 3 -7 128.61 9.32
 -4 3 5 854.3 45.46
 4 3 -5 665.8 45.84
 4 3 -4 124.87 8.43
 4 3 -4 87.27 8.59
 4 3 -4 100.36 7.8
 4 3 -4 94.2 9.22
 -4 3 4 114.2 8.03
 -4 3 3 773.34 43.34
 4 3 -3 761.88 42.92
 4 3 -3 719.99 44.96
 4 3 -3 765.22 43.46
 4 3 -3 787.57 43.04
 -4 3 3 793.29 42.88
 -4 3 2 977.24 54.47
 4 3 -2 973.71 53.76
 4 3 -2 902.36 55.91
 -4 3 2 956.91 54.19
 4 3 -2 1035.7 54.63
 4 3 -2 869.65 53.95
 4 3 -2 1006.41 54.19
 4 3 -1 1300.52 80.75
 4 3 -1 1426.34 79.17
 4 3 -1 1577.89 79.59
 4 3 -1 1141.27 79.1
 -4 3 1 1375.88 79.4
 4 3 -1 1498.75 79.45
 -4 3 0 235.4 16.03
 4 3 0 261.39 16.22
 4 3 0 269.91 16.31
 4 3 0 226.41 17.38
 -4 3 0 244.66 16.65
 4 3 0 279.7 16.31
 -4 3 -1 46.1 4.44
 4 3 1 47.18 4.56
 -4 3 -1 43.99 5.01
 4 3 1 50.01 4.4
 -4 3 -1 47.76 4.28
 -4 3 -1 46.59 4.74
 -4 3 -2 414.7 25.3
 -4 3 -2 412.82 25.69
 -4 3 -2 388.08 25.83
 4 3 2 442.83 25.83
 -4 3 -3 68.92 5.43
 4 3 4 139.6 9.37
 -4 3 -4 149.84 10.15
 -4 3 -5 156.14 11.03
 4 3 5 160.99 10.72
 4 3 6 24.28 3.27
 -4 3 -6 20.62 4.26
 4 3 6 22.9 3.23
 -4 3 -6 23.1 3.92
 -4 3 -7 71.54 7.19
 4 3 7 75.64 6.61
 -4 3 -7 85.67 7.8
 4 3 7 87.9 6.95
 4 3 7 83.29 6.65
 -4 3 -8 77.97 8.31
 4 3 8 71.92 6.37
 4 3 8 62.71 5.83
 4 3 8 72.16 5.92
 4 3 8 72.86 6.16
 -4 3 -8 50.8 6.21
 -4 3 -8 65.08 7.07
 -4 3 -9 85.62 9.24
 4 3 9 77.89 6.8
 -4 3 -9 75.76 7.77
 4 3 9 80.93 7.01
 4 3 9 75.28 6.56
 -4 3 -10 149.97 12.7
 -4 3 -10 148.86 13.59
 4 3 10 157.96 11.05
 -4 3 -10 157.92 12.93
 -4 3 -11 10.24 5.23
 4 3 11 10.28 2.89
 -4 3 -11 2.95 5.34
 -4 3 -11 11.74 7.06
 4 3 11 7.31 2.66
 -4 3 -12 18.39 5.81
 4 3 12 4.68 2.33
 -4 3 -12 4.85 3.06
 4 3 12 10.75 2.76
 -4 3 -12 13.3 4.87
 4 3 13 84.36 6.25
 -4 3 -13 90.44 7.45
 4 3 13 92.09 6.06
 4 3 13 88.48 6.47
 4 4 -15 9.34 2.2
 -4 4 15 8.76 1.88
 -4 4 15 9.87 1.69
 4 4 -15 5.02 2.65
 -4 4 15 8.23 1.64
 -4 4 14 91.3 7.12
 -4 4 14 98.49 7.08
 4 4 -14 104.94 7.97
 -4 4 13 8.39 3.09
 -4 4 13 8.62 2.67
 -4 4 13 7.65 2.49
 4 4 -13 7.9 4.74
 4 4 -12 14.47 5.9
 -4 4 12 8.6 3.31
 -4 4 12 9.37 2.97
 -4 4 12 6.27 2.29
 4 4 -12 8.9 5.15
 -4 4 12 9.48 2.81
 -4 4 11 9.25 2.57
 4 4 -11 23.72 5.87
 -4 4 11 10.95 3.19
 4 4 -11 16.09 5.51
 -4 4 11 17.86 3.28
 -4 4 10 193.43 12.11
 -4 4 10 150.32 11.27
 4 4 -10 163.48 13.02
 4 4 -10 182.82 12.42
 -4 4 10 172.04 12.09
 -4 4 9 65.72 5.66
 -4 4 9 68.26 6.23
 4 4 -9 52.79 7.25
 4 4 -8 146.65 11.91
 -4 4 8 168.75 11.22
 -4 4 -4 199.93 13.37
 -4 4 -5 54.71 5.35
 -4 4 -6 19.66 4.18
 4 4 6 14.77 2.9
 -4 4 -7 71.31 7.45
 4 4 7 54.67 5.24
 -4 4 -7 52.48 6.2
 4 4 7 66.4 5.67
 -4 4 -8 216.3 14.07
 -4 4 -8 173.18 12.77
 4 4 8 182.48 12.19
 4 4 8 170.13 11.86
 -4 4 -9 287.04 20.49
 4 4 9 344.93 19.98
 -4 4 -9 342.73 21.37
 4 4 9 283.43 19.12
 -4 4 -9 324.76 21.14
 -4 4 -10 47.36 6.13
 -4 4 -10 45.25 7.73
 4 4 10 56.89 4.92
 -4 4 -10 47.86 6.58
 4 4 10 35.26 3.96
 -4 4 -11 23.66 4.39
 -4 4 -11 23.79 5.56
 4 4 11 23.91 3.21
 -4 4 -11 19.12 4.66
 4 4 11 28.75 3.56
 4 4 12 66.49 4.73
 -4 4 -12 47.89 4.98
 4 4 12 59.8 4.47
 4 4 12 69.55 4.45
 -4 4 -12 38.9 4.28
 4 5 -13 0.84 2.55
 -4 5 13 1.66 1.46
 -4 5 13 3.78 1.58
 4 5 -13 1.88 2.24
 4 5 -12 14.53 3.84
 -4 5 12 15.34 2.51
 4 5 -12 13.88 3.38
 -4 5 12 12.07 1.92
 4 5 -11 20.01 4.73
 -4 5 11 18.77 3
 4 5 -11 19.69 4.01
 -4 5 11 15.03 2.32
 4 5 -10 174.16 12.08
 -4 5 10 143.68 10.53
 4 5 -10 167.73 11.67
 -4 5 10 187.42 11.4
 -4 5 9 187.08 11.28
 4 5 -9 173.68 11.65
 -4 5 -3 294.78 18.43
 -4 5 -5 5.6 2.68
 4 5 6 103.54 7.32
 -4 5 -6 87.81 7.63
 -4 5 -7 38.19 4.96
 4 5 7 32.17 3.21
 -4 5 -7 24.58 3.62
 -4 5 -8 34.7 6.48
 -4 5 -8 33.45 4.54
 4 5 8 29.75 3.4
 -4 5 -8 34.46 5.38
 -4 5 -8 28.68 4.73
 -4 5 -9 67.74 6.46
 -4 5 -9 88.43 8.27
 -4 5 -9 70.6 6.79
 4 5 9 90 6.17
 4 5 9 102.79 6.53
 -4 5 -9 93.16 7.52
 4 5 10 65.88 4.57
 4 5 10 60.7 4.19
 -4 5 -10 42.99 5.51
 -4 5 -10 37.76 4.33
 4 5 10 51.01 3.89
 -4 5 -10 50 4.94
 -4 6 -4 82.51 6.37
 -4 6 -6 81.37 6.34
 4 6 7 5.29 1.25
 -4 6 -7 0.1 3.16
 -4 6 -7 3.41 2.18
 5 -7 -4 5.92 2.1
 5 -7 -3 8.03 1.81
 5 -7 -2 133.61 8.53
 5 -7 -1 7.33 1.99
 5 -7 0 14.26 2.06
 5 -7 1 119.51 7.53
 -5 -6 10 0.69 1.47
 5 -6 -10 -1.01 2.05
 -5 -6 10 0.98 1.55
 -5 -6 9 67.01 5.38
 5 -6 -9 71.21 6.09
 5 -6 -8 29.49 4.5
 -5 -6 8 27.45 3.78
 5 -6 -7 131.66 9.26
 5 -6 -7 98.92 7.85
 -5 -6 7 110.64 8.18
 -5 -6 7 108.19 8.41
 -5 -6 6 1.92 2.57
 -5 -6 6 5.69 2.73
 5 -6 -6 4.94 3.99
 5 -6 -6 1.29 2.62
 -5 -6 5 18.98 3.57
 -5 -6 5 19.43 3.43
 5 -6 -5 18.2 4.65
 5 -6 -5 18.77 3.58
 -5 -6 4 7.02 2.83
 5 -6 -4 8.73 4.16
 -5 -6 4 9.36 3.03
 5 -6 -4 5.28 2.92
 5 -6 -3 15.95 4.58
 -5 -6 3 14.06 3
 -5 -6 3 16.21 3.03
 -5 -6 3 12.07 3.13
 5 -6 -3 18.71 3.52
 5 -6 -2 8.19 4.1
 -5 -6 2 6.94 2.29
 -5 -6 2 5.35 2.47
 -5 -6 2 5.26 3.12
 5 -6 -2 8.22 2.95
 5 -6 -1 82.97 7.67
 -5 -6 1 89.35 6.32
 -5 -6 1 79.43 7.33
 5 -6 -1 74.14 6.64
 5 -6 0 123.49 9.6
 5 -6 0 110.94 8.88
 -5 -6 0 124.14 9.49
 5 -6 0 115.69 8.59
 5 -6 1 1.01 3.42
 -5 -6 -1 2.27 3.24
 5 -6 1 4.93 2.76
 5 -6 2 194.78 12.94
 -5 -6 -2 203.36 13.77
 5 -6 2 221.22 12.76
 5 -6 3 79.74 7.12
 -5 -6 -3 83.5 7.31
 5 -6 3 84.53 6.27
 -5 -6 -4 19.75 3.72
 5 -6 4 10.88 3.34
 5 -6 4 20.93 2.87
 5 -6 5 56.12 4.65
 -5 -6 -5 53.85 5.11
 5 -6 5 39.98 4.84
 5 -6 6 33.72 4.1
 5 -6 6 45.38 3.72
 5 -6 7 108.65 5.74
 -5 -6 -7 125.09 6.42
 -5 -5 13 13.92 1.77
 5 -5 -13 18.75 2.75
 5 -5 -12 61.08 5.71
 5 -5 -12 63.89 5.11
 -5 -5 12 67.25 5.27
 -5 -5 12 56.86 4.72
 -5 -5 11 39.73 4.55
 5 -5 -11 37.04 5.18
 -5 -5 11 34.71 3.92
 5 -5 -11 38.71 4.48
 5 -5 -10 40.69 5.83
 5 -5 -10 46.6 5.41
 5 -5 -10 37.22 4.97
 -5 -5 10 34.87 5.06
 -5 -5 10 38.43 4.51
 -5 -5 9 8.52 3.49
 5 -5 -9 12.77 4.12
 5 -5 -9 12.7 4.91
 -5 -5 9 9.86 4.23
 5 -5 -9 11.71 3.94
 5 -5 -8 73.86 8.3
 -5 -5 8 72.53 7.21
 5 -5 -8 92.67 7.62
 5 -5 -8 75.74 7.57
 5 -5 -7 30.45 6.18
 5 -5 -7 35.47 5.37
 -5 -5 7 32.97 3.64
 5 -5 -7 42.65 5.17
 5 -5 -6 103.25 10
 -5 -5 6 106.66 9.64
 5 -5 -6 124.54 8.94
 -5 -5 6 97.5 8.99
 5 -5 -6 105.06 9.19
 5 -5 -5 18.65 4.34
 -5 -5 5 17.38 4.26
 5 -5 -5 15.73 5.51
 5 -5 -5 22.97 3.71
 -5 -5 5 20.62 5.09
 -5 -5 5 17.5 3.59
 5 -5 -4 197.23 14.43
 -5 -5 4 163.97 13.12
 -5 -5 4 199.09 13.84
 -5 -5 4 195.88 13.46
 5 -5 -4 196.4 13.62
 5 -5 -3 40.41 5.42
 5 -5 -3 43.96 6.47
 -5 -5 3 44.21 5.49
 -5 -5 3 37.59 5.3
 -5 -5 3 47.59 5.3
 -5 -5 2 4.21 3.01
 5 -5 -2 2.55 4.52
 -5 -5 2 5 3.14
 -5 -5 2 3.52 3.69
 5 -5 -2 0.33 3.59
 -5 -5 1 92.5 7.64
 5 -5 -1 91.79 8.13
 -5 -5 1 77.46 8.15
 5 -5 -1 107.9 9.17
 -5 -5 1 100.16 7.91
 -5 -5 0 199.54 14.66
 -5 -5 0 205.65 13.43
 5 -5 0 216.12 14.82
 -5 -5 0 210.2 13.51
 5 -5 0 197.06 13.86
 5 -5 0 170.28 13.53
 -5 -5 -1 330.81 19.17
 -5 -5 -1 295.08 20.55
 5 -5 1 312.42 20.47
 5 -5 1 280.89 20.12
 5 -5 1 294 19.6
 5 -5 2 280.34 18.65
 -5 -5 -2 272.75 19.47
 5 -5 2 288 19.85
 5 -5 2 316.22 19.83
 -5 -5 -3 53.13 6.11
 5 -5 3 63.66 7.61
 -5 -5 -3 55.83 6.86
 5 -5 3 42.2 6.2
 5 -5 3 57.58 6.13
 -5 -5 -4 58.26 6.54
 5 -5 4 53.8 6.08
 5 -5 4 61.36 7.75
 5 -5 4 48.44 5.86
 -5 -5 -5 55.43 6.55
 5 -5 5 53.62 5.89
 5 -5 5 47.96 7.3
 5 -5 5 58.36 5.85
 -5 -5 -6 11.72 4.22
 5 -5 6 22.29 3.85
 5 -5 6 18.95 5.18
 -5 -5 -6 17.65 4.41
 5 -5 6 8.51 2.64
 -5 -5 -6 14.3 3.41
 5 -5 6 23.25 3.96
 5 -5 7 45.17 4.39
 -5 -5 -7 35.61 4.34
 5 -5 7 23.31 3.37
 5 -5 7 29.48 5.23
 -5 -5 -7 38.27 4.91
 5 -5 8 128.54 9.99
 5 -5 8 184.66 10.23
 5 -5 8 129.62 11.03
 -5 -5 -8 190.92 11.15
 -5 -5 -9 62.18 5.01
 5 -5 10 2.12 1.41
 5 -4 -15 45.16 3.78
 -5 -4 15 52.93 4.18
 -5 -4 14 56.59 5.33
 5 -4 -14 58.08 5.15
 5 -4 -13 16.78 3.68
 -5 -4 13 17.76 2.89
 -5 -4 13 12.37 3.43
 5 -4 -12 12.48 3.86
 5 -4 -12 10.15 4.03
 -5 -4 12 8.43 2.61
 -5 -4 12 10.64 3.33
 -5 -4 12 13.23 4.24
 5 -4 -11 278.05 18.47
 5 -4 -11 302.09 18.42
 -5 -4 11 252.83 18.3
 -5 -4 11 234.93 17.55
 5 -4 -11 273.52 18.18
 5 -4 -10 376.77 23.81
 -5 -4 10 364.63 23.59
 -5 -4 10 300.53 23.26
 -5 -4 10 332.54 23.04
 5 -4 -10 342.81 23.28
 5 -4 -9 115.7 10.29
 -5 -4 9 116.88 10.09
 -5 -4 9 86.44 9.67
 -5 -4 9 115.39 10.01
 5 -4 -9 118.36 9.7
 5 -4 -9 116.85 10
 5 -4 -8 147.06 12.27
 -5 -4 8 163.1 10.43
 -5 -4 8 155.62 12.09
 -5 -4 8 135.53 12.32
 -5 -4 8 139.19 12.01
 5 -4 -8 160.79 12.08
 5 -4 -8 151.96 12.02
 -5 -4 7 76.14 8.18
 5 -4 -7 77.8 7.1
 -5 -4 7 89.57 6.46
 5 -4 -7 82.45 8.19
 -5 -4 7 76.88 7.82
 -5 -4 7 69.53 7.95
 5 -4 -7 84.58 7.61
 5 -4 -7 79.52 7.92
 5 -4 -6 334.7 21.41
 5 -4 -6 311.64 21.76
 -5 -4 6 299.57 21.8
 -5 -4 6 353.86 22.86
 5 -4 -6 340.35 22.3
 -5 -4 6 367.2 20.43
 5 -4 -6 334.85 21.56
 -5 -4 5 416.79 26.27
 -5 -4 5 407.11 26.39
 5 -4 -5 379.84 26.22
 -5 -4 5 378.79 25.79
 5 -4 -5 436.54 25.75
 -5 -4 5 443.85 27.09
 5 -4 -5 445.52 25.83
 5 -4 -5 413.46 26.04
 -5 -4 4 62.07 6.72
 5 -4 -4 67.27 6.76
 -5 -4 4 74.98 7.63
 5 -4 -4 75.08 6.78
 -5 -4 4 72.7 7.39
 5 -4 -4 80.24 6.5
 -5 -4 3 47.74 5.76
 -5 -4 3 49.34 6.13
 5 -4 -3 57.29 6.11
 -5 -4 3 64.34 6.74
 5 -4 -3 57.39 5.87
 5 -4 -3 64.34 6.31
 -5 -4 3 58.32 5.76
 -5 -4 2 202.78 14.19
 5 -4 -2 197.3 13.68
 -5 -4 2 203.27 14.74
 -5 -4 2 199.84 13.71
 -5 -4 2 185.97 13.26
 5 -4 -2 200.69 14.04
 -5 -4 2 195.2 13.66
 -5 -4 1 185.96 13.24
 -5 -4 1 188.03 13.41
 5 -4 -1 167.75 12.41
 5 -4 -1 193.1 13.41
 -5 -4 1 186.13 12.49
 5 -4 -1 172.84 12.79
 -5 -4 1 189.1 12.76
 5 -4 0 197.17 13.56
 -5 -4 0 191.92 13.9
 5 -4 0 176.65 13.24
 -5 -4 0 177.68 12.86
 5 -4 0 207.14 14.22
 -5 -4 0 192.35 13.81
 -5 -4 0 203.06 12.98
 -5 -4 -1 27.43 4.18
 -5 -4 -1 27.67 4.89
 -5 -4 -1 23.79 3.53
 5 -4 1 28.95 4.79
 -5 -4 -1 27.27 3.7
 -5 -4 -1 31.37 5.29
 5 -4 1 35.65 5.79
 5 -4 1 28.77 4.76
 -5 -4 -2 64.22 6.71
 -5 -4 -2 64.09 7.45
 -5 -4 -2 64.32 5.51
 5 -4 2 67.25 7.48
 5 -4 2 66.19 7.71
 5 -4 2 61.48 6.77
 -5 -4 -3 579.8 33.58
 -5 -4 -3 553.39 34.02
 5 -4 3 547.24 33.86
 5 -4 3 595.92 34.23
 5 -4 3 473.12 32.27
 -5 -4 -3 554.01 32.6
 5 -4 3 513.54 32.68
 -5 -4 -4 124.95 9.9
 -5 -4 -4 102.59 9.81
 5 -4 4 116.74 10.38
 5 -4 4 97.91 8.52
 5 -4 4 81.92 8.29
 -5 -4 -4 106.94 9.59
 -5 -4 -4 109.77 8.91
 5 -4 4 102.47 8.92
 -5 -4 -5 172.26 12.71
 5 -4 5 135.58 10.93
 5 -4 5 140.3 11.51
 -5 -4 -5 151.49 11.95
 5 -4 5 167.3 13.24
 -5 -4 -5 162.49 12.47
 5 -4 5 164.57 11.66
 -5 -4 -6 289.61 20.03
 5 -4 6 282.46 18.35
 5 -4 6 311.76 19.16
 5 -4 6 272.51 19.34
 5 -4 6 289.23 20.49
 -5 -4 -6 294.99 19.78
 -5 -4 -6 289.87 19.73
 -5 -4 -7 38.68 6.43
 5 -4 7 41.11 5.24
 5 -4 7 38.07 5.49
 -5 -4 -7 41.46 6.02
 -5 -4 -7 39.18 5.72
 5 -4 7 53.94 6.06
 -5 -4 -8 9.31 4.62
 5 -4 8 11.85 3.89
 5 -4 8 19.42 3.7
 -5 -4 -8 10.88 3.91
 5 -4 8 11.65 5.04
 -5 -4 -8 13.69 4.42
 -5 -4 -9 14.24 4.44
 5 -4 9 13.63 3.02
 -5 -4 -9 15.65 3.46
 5 -4 9 13.95 3.43
 -5 -4 -9 13.26 4.1
 5 -4 9 11.74 4.32
 5 -4 10 2.04 2.38
 5 -4 10 7.64 3.48
 -5 -4 -10 1.15 2.89
 -5 -4 -10 4.32 2.13
 5 -4 11 7.26 2.03
 5 -4 11 8.77 2.4
 -5 -4 -11 11.93 2.59
 5 -3 -16 133.43 8.53
 -5 -3 16 123.96 8.46
 5 -3 -15 15.57 3.34
 -5 -3 15 16.95 3.59
 5 -3 -15 14.06 3.58
 5 -3 -15 19.98 3.84
 5 -3 -14 211.8 13.73
 -5 -3 14 199.29 13.72
 5 -3 -14 192.42 13.33
 5 -3 -14 206.47 13.66
 5 -3 -13 19.25 4.86
 -5 -3 13 11.63 4.15
 -5 -3 13 16.33 4.54
 -5 -3 13 14.31 2.94
 5 -3 -13 18.51 4.8
 5 -3 -12 20.49 5.02
 5 -3 -12 23.69 5.58
 -5 -3 12 14.16 4.92
 -5 -3 12 13.17 4.59
 5 -3 -12 18.93 5.23
 -5 -3 12 22.29 4.08
 -5 -3 12 17.4 2.9
 -5 -3 11 80.67 8.06
 -5 -3 11 65.85 6.77
 5 -3 -11 72.88 8.22
 -5 -3 11 51.52 7.64
 5 -3 -11 73.47 7.8
 5 -3 -11 74.39 7.72
 5 -3 -10 81.88 8.66
 -5 -3 10 81.54 8.94
 -5 -3 10 74.13 7.37
 -5 -3 10 66.85 7.84
 5 -3 -10 74.73 6.96
 5 -3 -10 80 8.05
 5 -3 -9 17.45 4.98
 -5 -3 9 18.88 4.77
 5 -3 -9 11.7 3.85
 -5 -3 9 10.3 4.7
 -5 -3 9 19.17 4.48
 5 -3 -9 15.76 4.74
 5 -3 -9 19.66 4.86
 5 -3 -8 142.39 10.77
 5 -3 -8 152.94 11.87
 -5 -3 8 128.4 10.96
 5 -3 -8 143.99 11.02
 -5 -3 8 162.8 10.08
 5 -3 -8 140.44 11.17
 -5 -3 8 141.74 11.27
 -5 -3 8 131.84 11.93
 -5 -3 7 147.47 9.19
 -5 -3 7 131.96 10.2
 5 -3 -7 134.18 10.84
 5 -3 -7 125.1 10.49
 -5 -3 7 136.68 11.21
 -5 -3 7 127.57 10.49
 -5 -3 7 130.79 10.33
 5 -3 -7 128.24 10.24
 5 -3 -7 135.24 10.1
 5 -3 -7 134.94 10.39
 5 -3 -6 160.91 12.31
 5 -3 -6 168.44 11.91
 -5 -3 6 185.35 10.78
 -5 -3 6 145.04 11.62
 5 -3 -6 169.27 11.63
 -5 -3 6 163.37 11.91
 -5 -3 6 153.84 11.98
 5 -3 -6 181.07 11.8
 -5 -3 6 159.82 12.48
 5 -3 -6 151.88 11.66
 -5 -3 5 38.08 4.66
 5 -3 -5 37.68 5.21
 -5 -3 5 34.11 4.66
 5 -3 -5 37.4 4.52
 -5 -3 5 47.43 3.82
 5 -3 -5 37.44 4.77
 -5 -3 5 40.08 5.14
 -5 -3 5 27.9 4.71
 5 -3 -5 38.35 4.36
 5 -3 -5 36.61 4.43
 5 -3 -5 36.44 4.82
 5 -3 -4 98.95 8.29
 -5 -3 4 93.16 7.93
 5 -3 -4 94.16 7.69
 5 -3 -4 95.71 7.95
 -5 -3 4 98.66 8.5
 -5 -3 4 113.16 8.27
 5 -3 -4 104.75 7.55
 5 -3 -4 92.12 7.66
 5 -3 -4 102.3 7.97
 -5 -3 3 418.87 26.6
 5 -3 -3 434.94 27.19
 -5 -3 3 431.99 27.09
 5 -3 -3 457.52 26.97
 -5 -3 3 448.74 27.68
 -5 -3 3 440.39 26.93
 -5 -3 3 457.18 27.2
 5 -3 -3 463.12 26.96
 5 -3 -3 465.61 26.3
 5 -3 -3 420.16 26.52
 5 -3 -3 446.93 26.17
 5 -3 -3 438.39 26.78
 5 -3 -3 443.94 27.51
 -5 -3 3 420.55 26.58
 -5 -3 2 1340.86 79.09
 5 -3 -2 1372.65 79.46
 -5 -3 2 1407.32 79.48
 5 -3 -2 1350.79 78.98
 5 -3 -2 1439.05 78.6
 5 -3 -2 1380.95 78.82
 -5 -3 2 1398.93 79.06
 -5 -3 2 1437.27 80.02
 -5 -3 2 1346.18 79.07
 5 -3 -2 1320.91 79.01
 -5 -3 2 1349.68 78.65
 5 -3 -2 1402.93 80.06
 5 -3 -2 1382.84 78.94
 5 -3 -1 420.88 27.37
 -5 -3 1 401.96 27.38
 -5 -3 1 477.01 27.93
 5 -3 -1 456.36 27.34
 -5 -3 1 467.3 27.4
 5 -3 -1 436.9 27.34
 5 -3 -1 454.61 27.18
 -5 -3 1 505.63 28.57
 -5 -3 1 457.12 27.23
 -5 -3 1 424.35 27.42
 -5 -3 1 463.58 27.01
 5 -3 -1 458.49 28.53
 5 -3 -1 461.69 27.02
 5 -3 -1 456.84 27.18
 -5 -3 0 582.06 35.03
 -5 -3 0 575.18 35.77
 -5 -3 0 612.44 35.2
 -5 -3 0 596.65 35.75
 -5 -3 0 578.11 35.84
 5 -3 0 598.32 36.5
 5 -3 0 567.07 35.23
 5 -3 0 612.76 35.35
 -5 -3 0 692.79 36.83
 5 -3 0 624.03 35.6
 -5 -3 0 589.7 34.89
 5 -3 0 595.14 36.87
 5 -3 0 551.21 35.13
 5 -3 0 583.66 35.62
 5 -3 0 606.71 35.14
 -5 -3 -1 355.68 22.42
 -5 -3 -1 357.27 22.93
 5 -3 1 358.26 22.14
 -5 -3 -1 365.81 23
 5 -3 1 348.45 22.2
 5 -3 1 355.9 23.7
 -5 -3 -1 356.03 22.83
 -5 -3 -1 342.93 21.74
 5 -3 1 387.06 22.88
 5 -3 1 326.73 22.52
 -5 -3 -1 401.3 21.95
 5 -3 1 358 22.21
 -5 -3 -2 76.38 6.89
 -5 -3 -2 69.11 7.04
 5 -3 2 69.67 6.39
 -5 -3 -2 73.45 7.21
 5 -3 2 66.43 6.55
 5 -3 2 85.24 7.29
 5 -3 2 69.98 6.09
 -5 -3 -2 77.13 5.8
 -5 -3 -2 71.94 6.32
 5 -3 2 68.3 7.12
 5 -3 2 66.61 6.38
 -5 -3 -3 237.22 15.85
 5 -3 3 204.71 15.05
 -5 -3 -3 222.77 16.09
 5 -3 3 224.02 15.38
 5 -3 3 210.01 15.14
 -5 -3 -3 276.56 14.73
 5 -3 3 234.06 15.96
 -5 -3 -3 220.54 15.46
 -5 -3 -3 229.07 15.73
 5 -3 4 83.04 7.76
 -5 -3 -4 113.1 9.35
 5 -3 4 111.52 8.84
 -5 -3 -4 119.59 9.33
 5 -3 4 108.52 9.3
 5 -3 4 121.18 9.97
 -5 -3 -4 105.52 9.05
 5 -3 5 67.18 7.54
 -5 -3 -5 45.69 6.4
 -5 -3 -5 41.65 6.62
 5 -3 5 40.27 5
 -5 -3 -5 45.1 5.75
 5 -3 5 50.7 5.9
 -5 -3 -5 47.11 6.43
 -5 -3 -6 171.38 13.31
 5 -3 6 147.65 10.88
 -5 -3 -6 160.99 12.04
 -5 -3 -6 148.41 12.58
 5 -3 6 160.14 12.1
 -5 -3 -6 173.33 12.86
 -5 -3 -7 96.35 9.48
 5 -3 7 94.33 7.57
 5 -3 7 89.79 8.72
 5 -3 7 86.25 9.08
 -5 -3 -7 96.99 9.31
 -5 -3 -7 92.41 9.58
 -5 -3 -7 94.97 8.42
 5 -3 8 19.85 3.82
 -5 -3 -8 19.44 4.09
 5 -3 8 21.69 4.99
 5 -3 8 17.82 5.31
 -5 -3 -8 16.71 5.48
 -5 -3 -9 153.01 12.49
 5 -3 9 167.67 10.39
 -5 -3 -9 149.45 10.96
 5 -3 9 155.59 12.29
 -5 -3 -9 148.38 12.04
 5 -3 9 133.81 11.57
 -5 -3 -10 64.88 7.23
 5 -3 10 61.31 6.48
 5 -3 10 56.52 6.71
 -5 -3 -10 61.42 6.93
 -5 -3 -11 3.16 3.43
 5 -3 11 4.94 3.29
 5 -3 11 4.53 3.05
 -5 -3 -11 5.71 3.7
 -5 -3 -12 46.85 4.53
 -5 -3 -12 46.89 4.65
 5 -3 13 7.66 1.73
 5 -2 -17 8.2 2.41
 5 -2 -17 12.18 2.54
 -5 -2 17 10.54 2.46
 5 -2 -17 13.1 2.78
 5 -2 -16 54.25 5.58
 -5 -2 16 32.17 4.29
 -5 -2 16 41.33 5.01
 5 -2 -16 44.8 5.14
 5 -2 -15 22.99 5.36
 5 -2 -15 28.2 5.5
 -5 -2 15 30.54 4.73
 -5 -2 15 21.35 4.29
 -5 -2 15 31.56 5.19
 5 -2 -15 25 5.02
 -5 -2 14 5.82 4.03
 5 -2 -14 4.38 5.11
 5 -2 -14 4.31 5.08
 -5 -2 14 1.67 3.77
 -5 -2 14 7.37 4.36
 -5 -2 13 515.72 31.88
 5 -2 -13 480.11 31.19
 5 -2 -13 480.87 31.53
 -5 -2 13 475.04 30.95
 5 -2 -13 503.54 30.33
 5 -2 -12 211.09 15.25
 5 -2 -12 209.73 15.68
 -5 -2 12 194.88 14.87
 -5 -2 12 219.32 15.97
 -5 -2 12 180.47 13.51
 5 -2 -12 189.79 13.55
 5 -2 -12 203.92 14.18
 5 -2 -11 32.36 4.86
 -5 -2 11 31.61 4.47
 -5 -2 11 31.52 6.22
 -5 -2 11 27.66 4.02
 -5 -2 11 35.37 5.53
 5 -2 -11 32.5 5.08
 5 -2 -11 31.27 5.21
 5 -2 -11 26.66 6
 5 -2 -11 31.7 6.43
 5 -2 -10 311.58 20.6
 -5 -2 10 279.11 19.74
 5 -2 -10 304.22 21.06
 5 -2 -10 322.68 20
 -5 -2 10 311.08 20.68
 -5 -2 10 286.82 19.54
 -5 -2 10 348.77 21.94
 5 -2 -10 356.32 20.36
 5 -2 -10 330.41 20.25
 -5 -2 10 278.49 19.52
 5 -2 -9 257.15 16.72
 -5 -2 9 234.24 16.15
 5 -2 -9 243.1 17.07
 -5 -2 9 236.15 16.52
 5 -2 -9 254.21 16.29
 -5 -2 9 287.71 18.01
 -5 -2 9 225.71 15.73
 -5 -2 9 225.23 15.79
 5 -2 -9 248.17 16.26
 5 -2 -8 140.3 10.99
 5 -2 -8 160.36 10.83
 -5 -2 8 150.34 10.81
 -5 -2 8 143.81 10.94
 5 -2 -8 159.67 11.72
 -5 -2 8 162.29 11.98
 -5 -2 8 131.73 10.25
 -5 -2 8 138.44 10.49
 5 -2 -8 158.79 10.9
 5 -2 -7 14.22 3.89
 -5 -2 7 12.06 3.23
 -5 -2 7 17.06 3.41
 5 -2 -7 13.58 4.04
 -5 -2 7 15.38 2.74
 5 -2 -7 15.95 3.39
 -5 -2 7 17.07 3.1
 -5 -2 7 15.91 2.96
 5 -2 -7 16.2 3.38
 -5 -2 7 14.7 4.09
 -5 -2 7 18.9 3.34
 5 -2 -7 17.52 3.58
 5 -2 -7 16.34 2.91
 5 -2 -6 130.72 9.81
 -5 -2 6 126.22 10.25
 -5 -2 6 122.67 9.54
 5 -2 -6 128.63 10.17
 -5 -2 6 122.42 9.65
 -5 -2 6 160.74 8.79
 -5 -2 6 124.33 9.56
 -5 -2 6 139.49 9.96
 5 -2 -6 130.96 9.5
 5 -2 -6 139.55 9.49
 5 -2 -6 138.8 9.57
 -5 -2 5 781.18 46.66
 -5 -2 5 711.68 45.96
 5 -2 -5 801.52 46.46
 5 -2 -5 761.85 45.8
 -5 -2 5 847.44 46.5
 -5 -2 5 784.48 46.05
 5 -2 -5 840.2 46.03
 5 -2 -5 813.14 45.79
 5 -2 -5 793.49 45.94
 5 -2 -4 368.58 22.4
 -5 -2 4 353.02 22.62
 5 -2 -4 371.26 22.95
 -5 -2 4 386.81 23.31
 5 -2 -4 406.99 22.42
 5 -2 -4 369.92 22.6
 5 -2 -4 389.15 22.55
 -5 -2 4 320.83 22.41
 -5 -2 4 403.97 22.91
 5 -2 -4 375.64 22.28
 5 -2 -3 137.87 9.89
 5 -2 -3 151.77 9.12
 -5 -2 3 150.31 9.85
 -5 -2 3 141.35 9.55
 5 -2 -3 135.75 9.42
 -5 -2 3 153.06 10.32
 5 -2 -3 141.22 9.46
 -5 -2 3 133.35 9.66
 5 -2 -3 138.75 9.64
 5 -2 -3 125.97 9.41
 5 -2 -2 132.95 9.19
 -5 -2 2 149.1 9.36
 5 -2 -2 152 8.69
 5 -2 -2 128.92 9.69
 -5 -2 2 146.63 9.74
 -5 -2 2 144.89 9.54
 -5 -2 2 132.89 9.21
 5 -2 -2 136.35 9.28
 5 -2 -2 120.75 9.29
 -5 -2 2 132.89 9.08
 5 -2 -2 130.87 9.24
 -5 -2 1 807.97 46.61
 -5 -2 1 790.04 46.59
 5 -2 -1 776.77 46.64
 -5 -2 1 847.14 46.76
 5 -2 -1 729.15 45.26
 5 -2 -1 810.26 46.2
 -5 -2 1 853.31 46.58
 5 -2 -1 747.16 45.42
 5 -2 -1 856.67 45.43
 -5 -2 1 832.15 46.23
 5 -2 -1 780.05 46.38
 -5 -2 1 885.5 46.13
 -5 -2 1 792.59 46.17
 5 -2 -1 792.51 46.2
 5 -2 -1 900.6 47.68
 5 -2 0 595.99 34.21
 5 -2 0 595.91 34.31
 -5 -2 0 618.1 34.63
 5 -2 0 613.2 33.34
 5 -2 0 504.16 33.16
 -5 -2 0 608.31 34.28
 -5 -2 0 634.64 34.98
 -5 -2 0 607.99 34.25
 5 -2 0 577.46 34.3
 -5 -2 0 646 34.27
 -5 -2 0 632.08 35.34
 -5 -2 0 597.5 34.9
 5 -2 0 645.43 34.42
 5 -2 0 585.27 34.62
 5 -2 0 569.82 34.26
 5 -2 0 643.18 35.94
 -5 -2 -1 190.78 11.95
 -5 -2 -1 181.84 12.41
 -5 -2 -1 188.48 12.45
 -5 -2 -1 195.78 12.52
 5 -2 1 176.59 11.66
 5 -2 1 198.33 11.96
 -5 -2 -1 194.73 11.55
 5 -2 1 168.65 11.68
 5 -2 1 186.07 11.83
 5 -2 1 201.89 12.41
 -5 -2 -1 189.86 12.13
 5 -2 1 195.99 13.43
 5 -2 1 162.54 10.55
 -5 -2 -2 233.9 14.87
 5 -2 2 238.67 14.76
 -5 -2 -2 230.46 15.34
 5 -2 2 215.54 15.23
 -5 -2 -2 265.74 14.46
 5 -2 2 211.49 14.55
 5 -2 2 236.21 16.56
 5 -2 2 237.58 14.75
 5 -2 2 223.51 15.12
 -5 -2 -2 217.21 15.02
 5 -2 2 244.65 15.8
 5 -2 2 217.36 16.08
 5 -2 3 505.1 33.13
 -5 -2 -3 540.22 31.81
 -5 -2 -3 553.03 32.16
 5 -2 3 588.19 31.46
 5 -2 3 516.88 31.26
 5 -2 3 481.18 31.02
 5 -2 3 522.28 30.77
 5 -2 3 550.95 31.8
 5 -2 3 526.3 32.7
 5 -2 3 498.71 31
 -5 -2 -4 1156.56 64.98
 -5 -2 -4 1226.86 65.62
 -5 -2 -4 1223.23 65.42
 5 -2 4 974.52 63.42
 5 -2 4 1108.54 64.25
 5 -2 4 1154.15 66.41
 5 -2 4 1067.01 63.84
 5 -2 4 1177.84 64.89
 -5 -2 -4 1124.77 64.85
 -5 -2 -4 1183.93 64.54
 5 -2 4 1116.32 64.11
 5 -2 4 1127.87 64.46
 -5 -2 -5 131.09 11.49
 -5 -2 -5 165.9 12.01
 5 -2 5 143.86 10.08
 -5 -2 -5 167.76 11.09
 5 -2 5 159.13 11.49
 -5 -2 -5 147.96 11.66
 5 -2 5 155.35 11.11
 5 -2 5 162.47 10.84
 -5 -2 -6 125.64 10.4
 5 -2 6 132.27 8.66
 5 -2 6 113.04 9.47
 5 -2 6 128.91 9.4
 -5 -2 -6 118.18 10.22
 -5 -2 -6 112.37 9.19
 -5 -2 -7 37.84 6.45
 -5 -2 -7 46.59 5.94
 5 -2 7 45.14 4.55
 5 -2 7 37.78 5.5
 5 -2 7 34.77 5.78
 -5 -2 -7 39.01 6.6
 -5 -2 -7 33.99 4.7
 5 -2 7 47 5.66
 -5 -2 -8 210.95 16.45
 -5 -2 -8 228.99 16.34
 5 -2 8 265.79 14.54
 5 -2 8 191.94 15.69
 -5 -2 -8 217.67 16.6
 5 -2 8 230.19 16.4
 -5 -2 -8 218 14.94
 -5 -2 -9 110.14 10.33
 5 -2 9 117.41 9.95
 -5 -2 -9 102.97 10.41
 -5 -2 -10 129.86 10.95
 -5 -2 -10 141.04 9.98
 5 -2 10 112.41 9.58
 5 -2 10 132.64 10.54
 -5 -2 -11 316.75 18.9
 5 -2 11 293.12 18.66
 -5 -2 -11 304.14 17.81
 5 -2 11 257.78 17.94
 5 -2 11 230.2 17.46
 -5 -2 -12 219.72 13.64
 -5 -2 -12 192.16 12.72
 5 -2 12 164.26 12.6
 5 -2 12 200.47 13.53
 -5 -2 -12 246.34 14.26
 -5 -2 -13 7.01 2.11
 5 -2 13 6.04 2.38
 -5 -2 -13 6.31 2.91
 5 -1 -17 112.08 7.98
 5 -1 -17 85.89 8.11
 -5 -1 17 102.96 7.99
 -5 -1 17 98.32 7.93
 -5 -1 17 111.07 7.9
 5 -1 -16 74.72 7.04
 -5 -1 16 61.98 6.57
 5 -1 -16 57.35 7.18
 -5 -1 16 57.1 6.69
 -5 -1 16 63.35 6.46
 5 -1 -15 25.39 6.36
 -5 -1 15 25.87 4.94
 5 -1 -15 21.78 5.31
 5 -1 -15 17.82 3.54
 -5 -1 15 23.52 5.36
 -5 -1 15 24.62 5.31
 5 -1 -14 334.83 21.71
 5 -1 -14 342.83 22.7
 -5 -1 14 334.48 21.76
 5 -1 -14 293.65 20.18
 -5 -1 14 316.84 21.6
 -5 -1 13 20.24 3.66
 5 -1 -13 26.87 7.16
 -5 -1 13 27.07 5.61
 5 -1 -13 17.57 4.28
 -5 -1 13 24.45 5.19
 5 -1 -13 24.27 5.73
 5 -1 -12 317.44 19.47
 -5 -1 12 252.87 17.81
 -5 -1 12 282.45 19.19
 5 -1 -12 292.31 18.41
 -5 -1 12 237.75 17.33
 5 -1 -12 308.89 20.27
 -5 -1 12 332.88 19.7
 5 -1 -12 274.34 17.79
 -5 -1 11 244.63 17.03
 5 -1 -11 294.96 18.27
 -5 -1 11 231.32 16.52
 -5 -1 11 313.98 18.46
 -5 -1 11 243.38 16.85
 5 -1 -11 270.07 17.36
 5 -1 -11 274.01 17.04
 5 -1 -11 292.99 19.21
 -5 -1 10 276.06 18.71
 5 -1 -10 323.47 19.77
 -5 -1 10 288.26 18.96
 5 -1 -10 305.8 20.49
 5 -1 -10 306.57 19.12
 -5 -1 10 274.2 18.48
 -5 -1 10 345.42 20.06
 5 -1 -10 309.13 18.9
 5 -1 -9 157.5 10.93
 5 -1 -9 144.32 10.79
 -5 -1 9 134.58 10.24
 -5 -1 9 157.69 10.97
 -5 -1 9 134.94 10.02
 -5 -1 9 125.42 9.75
 5 -1 -9 149.56 10.5
 5 -1 -9 150.58 10.22
 5 -1 -8 213.51 13.98
 -5 -1 8 205.87 13.63
 5 -1 -8 202.18 13.18
 -5 -1 8 183.83 12.75
 5 -1 -8 186.89 12.63
 -5 -1 8 170.43 12.33
 5 -1 -8 177.82 12.74
 -5 -1 8 214.74 13.38
 5 -1 -8 216.85 13.82
 5 -1 -8 243.92 13.11
 5 -1 -8 201.11 12.7
 -5 -1 8 170.19 12.41
 5 -1 -8 193.59 13.32
 5 -1 -7 653.72 37.7
 5 -1 -7 690.27 38.59
 -5 -1 7 702.96 39.43
 -5 -1 7 631.92 38.32
 5 -1 -7 650.91 38.31
 -5 -1 7 591.26 37.93
 -5 -1 7 674.82 39.01
 -5 -1 7 710.17 38.77
 5 -1 -7 728.03 39.3
 5 -1 -7 668.9 38.19
 5 -1 -7 623.98 37.21
 5 -1 -7 730.25 39.19
 5 -1 -7 650.91 38.21
 5 -1 -6 416.96 24.78
 5 -1 -6 421.89 25.57
 -5 -1 6 387.19 25.4
 -5 -1 6 410.18 25.66
 -5 -1 6 429.35 25.94
 5 -1 -6 418.1 25.47
 -5 -1 6 447.17 26.29
 5 -1 -6 440.6 26.09
 -5 -1 6 433.61 25.7
 5 -1 -6 483.83 25.59
 5 -1 -6 429.76 24.53
 5 -1 -6 464.42 26.21
 -5 -1 5 195 12.7
 5 -1 -5 188.57 12.45
 5 -1 -5 195.35 12.71
 5 -1 -5 196.27 11.29
 -5 -1 5 174.42 12.24
 -5 -1 4 1259.51 66.74
 5 -1 -4 1214.87 66.06
 5 -1 -4 1142.32 66.3
 5 -1 -4 1160.19 66.63
 5 -1 -4 1210.87 66.31
 5 -1 -4 1083.28 65.43
 -5 -1 3 1734.78 93.19
 5 -1 -3 1702.06 92.99
 -5 -1 3 1479.3 92.84
 5 -1 -3 1757.54 92.83
 5 -1 -3 1647.33 92.88
 5 -1 -3 1598.94 92.27
 5 -1 -3 1589.44 93.19
 5 -1 -2 806.74 45.25
 -5 -1 2 826.41 46.23
 5 -1 -2 756.54 46.15
 5 -1 -2 761.59 46.04
 -5 -1 2 773.04 46.17
 -5 -1 2 838.35 45.47
 5 -1 -1 1057.46 62.63
 -5 -1 1 1101.05 62.58
 5 -1 -1 1108.32 61.86
 5 -1 0 935.11 52.81
 5 -1 0 902.34 52.8
 -5 -1 0 919.75 53.12
 -5 -1 0 952.74 53.02
 5 -1 1 1851.74 103.8
 5 -1 1 1776.75 103.11
 5 -1 1 1810.9 103.36
 -5 -1 -1 1877.24 103.51
 -5 -1 -1 1838.55 103.26
 -5 -1 -2 249.9 15.09
 5 -1 2 218.9 14.45
 5 -1 2 224.16 14.61
 5 -1 2 227.53 14.93
 5 -1 2 227.22 14.28
 5 -1 2 199.53 13.99
 -5 -1 -2 255.15 15.1
 -5 -1 -2 241.34 14.64
 -5 -1 -2 247.48 14.41
 -5 -1 -2 246.17 14.43
 5 -1 2 254.49 16.05
 5 -1 3 210.53 12.98
 5 -1 3 198.57 13.28
 -5 -1 -3 210.26 13.59
 -5 -1 -3 220.52 13.77
 5 -1 3 194.69 13.23
 -5 -1 -3 226.7 13.54
 5 -1 3 198.34 13.6
 5 -1 3 198.47 12.98
 5 -1 3 192.27 12.56
 -5 -1 -3 196.86 13.16
 -5 -1 -3 222.83 13.84
 -5 -1 -3 222.8 13.83
 5 -1 3 199.65 12.75
 -5 -1 -3 218.9 13.12
 -5 -1 -3 209.23 13.36
 5 -1 3 210.1 14.76
 5 -1 3 189.82 12.75
 -5 -1 -3 213.09 13.37
 -5 -1 -4 54.83 5.07
 -5 -1 -4 58.72 5.48
 5 -1 4 47.99 4.3
 -5 -1 -4 58 5.57
 5 -1 4 51.76 5.28
 5 -1 4 53.24 5.16
 -5 -1 -4 60.6 5.54
 5 -1 4 48.86 4.64
 5 -1 4 55.48 4.23
 5 -1 4 49.8 4.3
 -5 -1 -4 51.11 4.95
 -5 -1 -4 50.84 4.53
 -5 -1 -4 64.38 5.56
 5 -1 4 52.6 4.76
 5 -1 4 53.93 4.7
 5 -1 4 54.96 4.61
 5 -1 4 51.91 4.97
 5 -1 4 49.25 6.05
 -5 -1 -4 54.11 4.64
 -5 -1 -4 53.32 4.87
 -5 -1 -5 99.82 7.92
 -5 -1 -5 100.38 8.13
 -5 -1 -5 96.19 7.71
 -5 -1 -5 88.42 7.32
 5 -1 5 82.35 6.38
 5 -1 5 80.91 6.56
 5 -1 5 86.16 6.57
 -5 -1 -5 102.41 8.11
 -5 -1 -5 86.62 7.47
 5 -1 5 98.8 7.03
 5 -1 5 85.09 6.92
 5 -1 5 90.11 7.21
 5 -1 5 89.25 6.86
 5 -1 5 98.83 6.89
 -5 -1 -5 86.36 7.33
 -5 -1 -6 48.05 6.04
 -5 -1 -6 58.23 5.88
 5 -1 6 44.97 4.41
 -5 -1 -6 50.5 6.52
 5 -1 6 51.54 5.05
 5 -1 6 60.91 5.23
 -5 -1 -7 78.19 7.99
 5 -1 7 73.43 7.19
 -5 -1 -7 81.7 7.26
 5 -1 7 77.1 6.84
 -5 -1 -8 806.44 46.34
 5 -1 8 784.14 46.51
 5 -1 8 759.89 46.08
 -5 -1 -8 756.67 47.02
 -5 -1 -9 250.38 17.23
 -5 -1 -9 207.67 17.18
 5 -1 9 260.14 16.94
 5 -1 9 239.33 16.53
 -5 -1 -10 299.87 19.37
 5 -1 10 282.83 19.12
 5 -1 10 263.63 18.4
 -5 -1 -10 282.45 19.7
 -5 -1 -11 58.59 6.52
 5 -1 11 54.94 6.51
 -5 -1 -11 51.17 7.55
 5 -1 12 4.13 3.29
 -5 -1 -12 5.56 2.89
 -5 -1 -12 0.18 4.35
 -5 -1 -13 11.76 3.17
 5 -1 13 3.76 2.35
 -5 -1 -13 3.98 3.11
 5 -1 13 2.9 2.3
 5 -1 14 64.09 5.56
 -5 -1 -14 115.49 6.35
 5 0 -18 13.65 2.8
 -5 0 18 17.8 2.55
 5 0 -18 11.65 2.13
 5 0 -17 22.99 3.69
 5 0 -17 26.4 5.06
 -5 0 17 27.06 3.47
 -5 0 17 35.23 4.85
 5 0 -16 48.55 5.29
 5 0 -16 56.01 6.03
 -5 0 16 61.83 5.92
 5 0 -15 7.44 4.3
 -5 0 15 7.53 2.72
 -5 0 15 1.91 4.2
 -5 0 15 6.74 3.54
 5 0 -15 5.93 3.72
 5 0 -14 92.96 8.59
 -5 0 14 71.06 6.94
 -5 0 14 80.1 8.38
 5 0 -14 89.9 7.97
 -5 0 14 83.44 8.67
 -5 0 14 80.76 8.03
 -5 0 14 81.79 7.19
 5 0 -13 510.51 30.18
 -5 0 13 529.6 30.4
 -5 0 13 443.27 29.09
 -5 0 13 494.32 30.41
 -5 0 13 449.13 30.21
 5 0 -13 480.54 29.66
 -5 0 13 456.48 29.17
 5 0 -12 13.48 5.45
 5 0 -12 28.3 4.24
 -5 0 12 27.33 4.29
 -5 0 12 29.99 5.22
 5 0 -12 23.53 7.5
 -5 0 12 30.9 5.36
 5 0 -12 24.49 6.07
 -5 0 12 31.41 4.81
 -5 0 12 30 3.44
 -5 0 12 32.56 4.27
 5 0 -11 209.73 14.51
 5 0 -11 172.34 14.21
 -5 0 11 188.12 13.65
 5 0 -11 209.5 15.66
 -5 0 11 209.81 13.76
 -5 0 11 201.8 14.42
 -5 0 11 222.13 13.4
 -5 0 11 220.67 14.6
 5 0 -11 206 13.68
 5 0 -10 175.61 11.68
 -5 0 10 188.47 12.39
 5 0 -10 188.9 14.03
 -5 0 10 177.76 12.81
 5 0 -10 175.01 12.78
 -5 0 10 190.85 12.97
 5 0 -10 169.76 12.85
 -5 0 10 177.1 12.27
 5 0 -10 200.84 12.45
 5 0 -9 21.34 4.51
 5 0 -9 19.32 3.9
 5 0 -9 26.72 3.65
 -5 0 9 21.92 3.24
 5 0 -9 20.31 3.14
 -5 0 9 20.94 3.66
 5 0 -9 22.44 5.14
 -5 0 9 20.79 3.06
 5 0 -9 21.55 4.36
 -5 0 9 26.97 3.74
 5 0 -9 22.41 2.97
 -5 0 9 20.2 3.77
 5 0 -9 28.3 3.39
 5 0 -8 496.66 32.21
 -5 0 8 510.81 32.49
 5 0 -8 577.66 31.84
 5 0 -8 562.24 32.97
 -5 0 8 522.15 32.12
 5 0 -8 552.04 33.08
 -5 0 8 559.44 32.51
 -5 0 8 523.8 32.47
 -5 0 8 591.68 33.48
 -5 0 8 568.93 33.76
 5 0 -8 519.05 32.32
 -5 0 8 515.64 32.09
 5 0 -8 635.21 32.45
 5 0 -8 529.05 34.09
 5 0 -8 577.36 33.45
 5 0 -7 38.43 4.69
 5 0 -7 52.07 4.63
 -5 0 7 47.55 4.35
 5 0 -7 54.85 4.21
 -5 0 7 48.19 4.16
 5 0 -7 47.16 5.22
 -5 0 7 44.74 4.41
 -5 0 7 40.7 4.33
 -5 0 7 46.68 4.76
 -5 0 7 46.53 5.08
 5 0 -7 42.11 4.68
 -5 0 7 43.06 4.03
 5 0 -7 46.32 4.86
 5 0 -7 55.12 4.59
 5 0 -6 125.52 8.68
 -5 0 6 118.34 8.11
 -5 0 6 126.01 8.96
 5 0 -6 121.63 9.08
 5 0 -6 115.73 8.85
 5 0 -6 125.87 9.04
 -5 0 5 931.44 54.79
 -5 0 5 982.02 54.48
 5 0 -5 927.46 54.95
 5 0 -5 855.05 54.66
 5 0 -5 979.92 54.08
 5 0 -5 950.22 54.88
 5 0 -5 983.56 54.6
 -5 0 4 803.99 45.74
 5 0 -4 737.83 46.06
 5 0 -4 786.46 46.24
 5 0 -4 828.02 45.45
 -5 0 3 136.2 8.63
 5 0 -3 136.69 8.33
 5 0 -3 111.01 8.86
 5 0 -2 32.47 3.64
 -5 0 2 38.35 3.36
 -5 0 2 33.37 3.12
 5 0 -2 30.28 2.94
 5 0 -2 35.65 3.65
 -5 0 2 37.72 3.53
 5 0 -2 27.42 3.6
 -5 0 1 33.82 2.97
 5 0 -1 34.5 3.74
 -5 0 1 27.47 2.83
 -5 0 1 32.02 3.4
 5 0 0 2129.3 122.34
 5 0 0 2122.35 121.86
 -5 0 0 2228.69 122.11
 -5 0 0 2159.27 121.73
 5 0 1 1636.59 92.77
 5 0 1 1540.18 92.78
 5 0 1 1648.03 93
 -5 0 -1 1712.05 93.26
 -5 0 -1 1630.95 92.87
 5 0 1 1721.56 93.74
 5 0 2 2922.39 161.7
 5 0 2 2648.5 161.55
 5 0 2 2851.27 161.78
 -5 0 -2 2937.72 162.25
 5 0 2 2877.77 162.44
 -5 0 -2 2911.34 162.06
 -5 0 -2 3013.47 162.18
 5 0 3 1494.78 87.5
 -5 0 -3 1607.7 88.18
 5 0 3 1463.08 87.14
 5 0 3 1357.23 87.23
 -5 0 -3 1648.73 86.92
 -5 0 -3 1430.77 87.32
 5 0 3 1533.15 87.58
 -5 0 -3 1638.44 87.15
 -5 0 -3 1519.7 87.86
 5 0 3 1593.15 88.35
 -5 0 -3 1587.87 87.17
 -5 0 -3 1526.96 87.8
 -5 0 -4 356.05 18.27
 5 0 4 279.55 18.62
 -5 0 -4 281.05 18.19
 5 0 4 274.19 18.22
 5 0 4 247.98 18.17
 -5 0 -4 305.29 17.96
 -5 0 -4 310.05 19.03
 -5 0 -4 285.19 18.2
 5 0 4 280.19 18.5
 5 0 4 266.04 17.7
 5 0 4 288.21 17.74
 5 0 4 314.07 17.8
 -5 0 -4 272.15 18.34
 5 0 4 308.01 18.05
 -5 0 -4 306.55 19.27
 5 0 4 284.66 19.2
 5 0 4 316.41 17.47
 -5 0 -4 278.88 18.81
 -5 0 -5 139.54 9.05
 5 0 5 116.41 8.38
 -5 0 -5 117.53 8.73
 5 0 5 121.51 9.15
 5 0 5 105.88 8.84
 -5 0 -5 114.25 9.44
 -5 0 -5 126.35 8.92
 -5 0 -5 117.45 9.45
 5 0 5 125.03 8.38
 5 0 5 117.8 8.11
 5 0 5 116.79 10.16
 5 0 5 122.99 8.68
 5 0 5 127.02 8.29
 -5 0 -5 118.5 8.63
 5 0 6 97.59 7.48
 -5 0 -6 104.47 8.32
 5 0 6 94.73 7.4
 5 0 6 91.46 8.26
 -5 0 -6 87.27 7.92
 -5 0 -6 91.43 7.93
 5 0 6 102.37 7.31
 -5 0 -6 115.52 8.85
 -5 0 -6 98 8.51
 5 0 6 104.12 7.82
 -5 0 -6 105.54 7.78
 -5 0 -7 62.06 6.8
 5 0 7 54.57 5.21
 -5 0 -7 49.19 6.43
 5 0 7 61.07 5.55
 5 0 7 64.2 5.6
 -5 0 -7 67.35 7.38
 -5 0 -7 56.63 6.11
 -5 0 -7 62.84 6.63
 -5 0 -8 107.73 9.04
 5 0 8 92.24 6.96
 -5 0 -8 126.63 9.19
 -5 0 -8 99.18 8.77
 5 0 8 97.4 8.41
 -5 0 -8 95.84 9.58
 5 0 8 92.67 7.53
 5 0 8 86.22 7.68
 5 0 8 102.66 7.54
 -5 0 -8 82.36 8.05
 -5 0 -8 77.24 9.05
 -5 0 -9 48.49 7.71
 -5 0 -9 52.74 6.39
 -5 0 -9 50.61 6.26
 5 0 9 46.32 4.54
 5 0 9 51.58 5.39
 5 0 9 60.67 5.4
 -5 0 -9 50.66 6.58
 5 0 9 52.83 5.47
 -5 0 -10 164.97 11.88
 5 0 10 137.26 10.3
 -5 0 -10 150.28 12.07
 5 0 10 159.76 11.07
 5 0 10 173.81 11.99
 -5 0 -10 154.95 12.78
 -5 0 -11 1.26 2.92
 5 0 11 0.15 2.27
 -5 0 -11 -0.19 4.02
 5 0 11 0.18 2.99
 -5 0 -11 2.73 4.9
 5 0 12 33.93 4
 -5 0 -12 33.94 5.05
 5 0 12 33.97 4.31
 -5 0 -12 42.5 5.78
 5 0 13 74.31 5.95
 5 0 13 75.33 5.96
 -5 0 -13 90.04 6.94
 5 0 14 259.01 17.4
 -5 0 -14 304.97 17.13
 -5 1 18 5.2 1.54
 5 1 -18 1.16 1.88
 -5 1 18 5.06 1.84
 5 1 -17 82.87 7.88
 5 1 -17 96.31 7
 -5 1 17 106.98 7.66
 5 1 -16 69.62 5.79
 -5 1 16 55.78 5.35
 5 1 -16 56.21 7.15
 -5 1 16 65.66 6.33
 5 1 -16 63.4 6.07
 -5 1 16 47.18 5.03
 -5 1 16 61.07 5.48
 5 1 -15 25.42 4.3
 -5 1 15 19.25 3.71
 -5 1 15 23.39 4.76
 5 1 -15 14.98 6.39
 -5 1 15 21.19 3.83
 5 1 -15 33.25 5.5
 -5 1 15 15.69 3.51
 5 1 -14 309.67 21.61
 5 1 -14 333.24 21.32
 -5 1 14 320.94 21.12
 5 1 -14 331.09 23.26
 -5 1 14 327.95 21.86
 -5 1 14 297.73 21.05
 -5 1 14 365.81 20.77
 5 1 -14 345.51 20.92
 -5 1 14 337.46 21.29
 5 1 -14 318.91 21.89
 5 1 -13 23.98 6.4
 5 1 -13 29.84 4.87
 -5 1 13 20.23 4.22
 -5 1 13 24.55 4.79
 5 1 -13 24.7 6.93
 5 1 -13 11.56 6.28
 -5 1 13 22.12 4.04
 -5 1 13 22.43 4.17
 5 1 -12 289.12 21.05
 5 1 -12 339.73 19.76
 -5 1 12 323.69 20.46
 5 1 -12 340.86 22.38
 -5 1 12 302.16 20.79
 5 1 -12 342.84 21.39
 -5 1 12 300.82 20.39
 -5 1 12 318.22 20.33
 -5 1 12 293.3 20.96
 5 1 -11 314.27 20.07
 -5 1 11 299.12 19.1
 5 1 -11 299.33 20.52
 -5 1 11 282.96 19.35
 5 1 -11 315.51 20.05
 -5 1 11 282.26 19.04
 -5 1 11 308.62 19.07
 -5 1 11 283.93 19.57
 5 1 -10 357.8 21.78
 -5 1 10 290.31 20.61
 -5 1 10 373.42 21.14
 5 1 -10 339.12 22.16
 -5 1 10 311.75 20.96
 5 1 -10 359.86 21.64
 -5 1 10 345.38 21
 -5 1 10 320.71 21.24
 5 1 -9 166.79 11.83
 -5 1 9 137.12 10.52
 -5 1 9 179.78 11.06
 5 1 -9 163.68 12.02
 -5 1 9 152.37 10.89
 -5 1 9 164.01 10.86
 -5 1 9 153.89 11.14
 -5 1 8 196.26 12.87
 5 1 -8 199.39 14.96
 -5 1 8 177.5 12.3
 5 1 -8 199.82 13.59
 5 1 -8 196.56 13.42
 -5 1 8 184.97 12.62
 -5 1 8 215.12 12.62
 -5 1 8 211.96 13.47
 5 1 -8 184.37 13.57
 5 1 -8 183.4 13.02
 5 1 -8 190.64 13.9
 5 1 -7 724.11 41.53
 5 1 -7 764.06 40.81
 -5 1 7 688.8 40.58
 -5 1 7 613.35 40.11
 5 1 -7 716.76 41
 -5 1 7 660.15 40.37
 5 1 -7 758.77 40.74
 5 1 -7 655.04 41.49
 -5 1 7 739.61 40.44
 5 1 -7 698.56 42.79
 5 1 -7 651.08 42.09
 -5 1 7 737.22 41.32
 5 1 -6 494.02 27.25
 5 1 -6 456.34 27.87
 -5 1 6 501.66 27.08
 5 1 -6 417.37 27.86
 5 1 -6 457.98 27.13
 5 1 -6 405.06 28.32
 -5 1 6 449.23 26.84
 -5 1 6 454.96 27.66
 5 1 -5 193.49 12.59
 5 1 -5 170.38 12.62
 -5 1 5 198.28 12.51
 5 1 -5 168.3 13.08
 5 1 -5 215 12.94
 -5 1 4 1174.18 66.73
 5 1 -4 1217.91 67.62
 5 1 -4 1177.66 67.14
 5 1 -4 1095.88 68.1
 -5 1 4 1195.89 67.36
 -5 1 3 1688.77 95.54
 5 1 -3 1529.62 96.76
 -5 1 3 1659.51 96.01
 5 1 -3 1700.43 96.13
 5 1 -3 1811.72 95.99
 -5 1 3 1712.15 96.12
 -5 1 2 790.57 44.89
 5 1 -2 757.82 44.89
 5 1 -2 825.92 44.84
 -5 1 2 798.29 45.09
 -5 1 2 742.6 44.2
 5 1 -1 1119.95 61.24
 -5 1 1 1108.9 61.13
 5 1 -1 1056.26 61.29
 5 1 -1 1001.25 60.94
 -5 1 1 1011.65 61.25
 -5 1 1 1094.39 60.58
 5 1 0 930.21 52.48
 -5 1 0 913.38 52.31
 -5 1 0 928.18 52.19
 -5 1 0 855.22 51.61
 5 1 0 922.27 52.2
 5 1 1 1848.2 101.82
 -5 1 -1 1813.54 101.62
 5 1 1 1727.29 100.53
 -5 1 -1 1896.8 101.67
 -5 1 -1 1741.67 100.97
 -5 1 -1 1767.12 101.71
 5 1 2 210.79 14.13
 5 1 2 264.82 14.71
 -5 1 -2 258.53 15.61
 5 1 2 237.79 15.08
 -5 1 -2 248.45 14.52
 -5 1 -2 205.85 14.55
 5 1 2 236.6 14.87
 5 1 2 232.17 15.42
 5 1 3 182.2 12.83
 5 1 3 212.99 13.29
 -5 1 -3 211.91 14.3
 5 1 3 193.18 13.71
 -5 1 -3 191.27 13.07
 5 1 3 224.55 12.98
 5 1 3 207.67 13.57
 -5 1 -3 241.13 13.42
 5 1 4 56.38 5.34
 5 1 4 53.88 4.64
 5 1 4 58.15 5.16
 -5 1 -4 47.3 5.62
 5 1 4 56.83 5.38
 -5 1 -4 53.75 5.7
 5 1 4 60.32 4.87
 -5 1 -4 49.72 4.98
 -5 1 -4 56.23 5.12
 5 1 5 97.99 7.83
 5 1 5 97.64 7.51
 -5 1 -5 103.4 7.84
 5 1 5 99.04 7.42
 5 1 5 104.46 7.64
 -5 1 -5 104.84 8.06
 5 1 5 102.1 7.38
 5 1 5 100.94 8.51
 -5 1 -5 89.44 7.6
 5 1 6 49.14 5.41
 5 1 6 52.91 4.98
 -5 1 -6 53.09 5.56
 5 1 6 51.13 5.11
 -5 1 -6 53.83 6
 -5 1 -6 40.8 5.65
 -5 1 -7 82.7 7.99
 -5 1 -7 69.96 7.15
 5 1 7 75.37 7.22
 -5 1 -7 98.06 8.71
 5 1 7 81.28 6.62
 5 1 7 73.74 6.56
 -5 1 -7 67.77 7.75
 5 1 7 81.72 6.97
 -5 1 -7 73.02 7.33
 -5 1 -8 845.27 48.23
 -5 1 -8 719.97 47.1
 -5 1 -8 797.05 48
 5 1 8 830.32 47.04
 -5 1 -8 752.63 47.54
 -5 1 -8 725.9 47.67
 5 1 8 805.75 47.36
 5 1 8 794.05 47.02
 -5 1 -8 960.78 48.24
 -5 1 -9 232.68 17.4
 -5 1 -9 223.5 16.97
 5 1 9 275.23 15.72
 -5 1 -9 194.46 16.77
 5 1 9 271.09 16.21
 -5 1 -9 286.79 17.86
 -5 1 -9 206.21 15.62
 5 1 9 257.03 16.38
 5 1 9 249.6 15.96
 5 1 9 188.62 15.48
 5 1 9 238.21 15.92
 -5 1 -9 234.51 16.71
 5 1 10 321.69 18.63
 -5 1 -10 333.65 20.52
 -5 1 -10 280.15 20.19
 5 1 10 311.2 19.19
 5 1 10 284.05 18.9
 5 1 10 333.87 19.07
 5 1 10 283.99 18.83
 5 1 10 278.63 19.14
 -5 1 -10 237.04 19.3
 -5 1 -10 234.04 20.16
 5 1 11 62.6 5.94
 5 1 11 55.3 5.14
 5 1 11 51.49 5.29
 -5 1 -11 48.72 7.31
 5 1 11 59.6 5.43
 -5 1 -11 50.79 6.66
 -5 1 -11 66.89 7.38
 -5 1 -12 9.6 4.72
 5 1 12 4.24 2.06
 5 1 12 1.98 2.51
 -5 1 -12 7.69 3.87
 -5 1 -13 4.9 3.55
 5 1 13 4.28 2.21
 -5 1 -13 5.98 2.51
 5 1 14 85.84 5.91
 -5 2 17 8.68 1.76
 -5 2 17 9.85 2.03
 5 2 -17 9.42 2.42
 5 2 -17 9.32 2.74
 -5 2 16 43.47 4.46
 5 2 -16 45.5 5.64
 -5 2 16 42.64 4.69
 -5 2 16 44.69 3.78
 -5 2 16 38.24 4.9
 -5 2 16 37.4 4.27
 5 2 -16 52.38 5.23
 5 2 -15 20.25 5.49
 -5 2 15 29.91 4.3
 -5 2 15 28.03 4.35
 5 2 -15 19.38 5.62
 -5 2 15 33.96 3.71
 -5 2 15 24.74 4.75
 -5 2 15 26.48 3.89
 5 2 -15 23.43 5.79
 5 2 -15 37.33 4.41
 5 2 -14 9.94 6.09
 5 2 -14 12.73 4.31
 -5 2 14 7.42 3.47
 -5 2 14 7.59 3.61
 5 2 -14 11.05 5.6
 -5 2 14 3.06 3.64
 5 2 -14 8.97 5.79
 -5 2 14 4.17 3.14
 5 2 -13 533.29 32.17
 -5 2 13 505.81 31.39
 5 2 -13 527.9 32.61
 -5 2 13 480.99 31.32
 -5 2 13 488.77 31.84
 5 2 -13 540.57 32.25
 5 2 -12 235.2 16.5
 -5 2 12 185.1 14.53
 -5 2 12 223.29 15.62
 -5 2 12 250.38 15.47
 5 2 -12 238.13 16.6
 -5 2 12 206.69 14.96
 -5 2 11 31.41 4.28
 -5 2 11 37.05 4.89
 -5 2 11 23.04 4.05
 -5 2 11 31.46 4.87
 5 2 -11 37.43 6.5
 -5 2 11 35.07 4.42
 -5 2 10 324.13 20.73
 -5 2 10 280.23 19.93
 5 2 -10 338.85 21.46
 -5 2 10 303.37 20.2
 5 2 -10 364.6 21.56
 -5 2 10 359.07 20.5
 -5 2 9 221.39 16.21
 5 2 -9 304.5 18.26
 -5 2 9 261.77 16.95
 5 2 -9 277.15 17.67
 -5 2 9 237.12 16.45
 5 2 -9 290.89 17.66
 -5 2 9 278.61 16.74
 5 2 -9 272.76 17.54
 -5 2 8 154.25 10.77
 -5 2 8 168.95 11.33
 5 2 -8 167.54 12.14
 5 2 -8 171.66 11.88
 -5 2 8 154.4 10.89
 -5 2 8 180.92 11.18
 5 2 -8 169.91 11.76
 -5 2 7 14.47 2.23
 5 2 -7 16.9 3.41
 -5 2 7 16.48 2.48
 5 2 -7 16.25 4.09
 -5 2 7 15.43 2.57
 5 2 -7 15.26 2.82
 -5 2 7 21.05 2.65
 5 2 -7 17.52 3.57
 5 2 -6 133.95 10.15
 -5 2 6 140.08 9.23
 -5 2 6 144.58 9.61
 5 2 -6 124.49 11.04
 -5 2 6 146.7 9.15
 5 2 -6 135.74 11.36
 5 2 -6 126.92 10.03
 5 2 -5 831.59 47.37
 5 2 -5 731.62 47.14
 5 2 -5 675.92 47.98
 -5 2 5 865.56 46.13
 -5 2 5 825.22 46.74
 -5 2 4 413.48 24.52
 -5 2 4 390.09 23.04
 -5 2 4 401.24 24.09
 5 2 -4 427.22 24.55
 -5 2 3 162.13 10.23
 -5 2 3 149.67 10.02
 -5 2 3 144.4 9.81
 -5 2 3 144.7 8.99
 5 2 -3 144.58 9.97
 5 2 -3 135.57 9.8
 -5 2 2 150.58 9.66
 5 2 -2 121.36 10.55
 5 2 -2 142.41 9.29
 -5 2 2 129.61 8.38
 5 2 -2 154.9 9.62
 -5 2 2 136.38 9.62
 -5 2 1 877 50.3
 5 2 -1 898.94 50.35
 5 2 -1 913.37 50.49
 5 2 -1 845.64 49.7
 -5 2 1 816.1 49.29
 -5 2 1 826.99 50.4
 5 2 -1 947.86 50.26
 5 2 -1 861.72 50.12
 5 2 0 663.79 36.54
 5 2 0 672.86 36.45
 -5 2 0 593.17 35.91
 -5 2 0 627.06 36.31
 -5 2 0 625.87 36.71
 -5 2 0 525.41 35.33
 5 2 0 653.49 36.07
 5 2 0 625.09 36.03
 5 2 1 197.4 13.07
 -5 2 -1 179.87 12.72
 5 2 1 208.67 13.06
 -5 2 -1 174.78 13.19
 5 2 1 190.96 12.52
 -5 2 -1 191.48 13.09
 -5 2 -1 228.4 12.54
 5 2 1 176.73 11.82
 -5 2 -2 213.45 15.11
 5 2 2 233.02 15.09
 5 2 2 215.61 15.01
 -5 2 -2 219.92 14.21
 -5 2 -2 196.69 15.02
 5 2 3 545.86 31.52
 5 2 3 564 30.91
 -5 2 -3 446.76 30.54
 -5 2 -3 495.53 32.03
 5 2 3 557.58 32.01
 -5 2 -3 502.53 32.14
 -5 2 -3 556.83 30.82
 5 2 4 1205.27 67.28
 5 2 4 1170.41 67.6
 -5 2 -4 1300.17 67.94
 -5 2 -4 1067.89 67.35
 5 2 5 158.48 10.47
 5 2 5 151.87 10.02
 -5 2 -5 150.4 10.64
 -5 2 -5 129.78 10.03
 5 2 6 116.36 8.29
 5 2 6 103.84 8.39
 5 2 6 111.26 8.04
 -5 2 -6 97.28 8.64
 -5 2 -6 102.41 8.86
 5 2 6 117.57 8.54
 -5 2 -7 37.19 6.65
 5 2 7 37.7 4.73
 5 2 7 47.04 5.07
 5 2 7 43.46 4.71
 -5 2 -7 49.02 6.05
 -5 2 -7 28.43 5.28
 5 2 7 40.72 4.77
 -5 2 -8 207.35 15.51
 -5 2 -8 199.58 15.4
 5 2 8 230.61 14.99
 5 2 8 239.77 15.14
 -5 2 -9 98.1 9.54
 -5 2 -9 116.28 11.18
 -5 2 -9 79.14 8.81
 5 2 9 105.86 8.58
 5 2 9 104.49 7.98
 5 2 9 111.32 8.68
 5 2 9 103.48 8.56
 -5 2 -9 129.26 10.61
 -5 2 -10 120.36 11.36
 5 2 10 162.53 10.22
 -5 2 -10 108.14 11.87
 -5 2 -10 103.1 10.15
 -5 2 -10 143.74 12.27
 5 2 10 154.12 10.5
 5 2 10 127.25 10.01
 5 2 10 130.82 10
 5 2 11 354.71 19.79
 -5 2 -11 371.56 21.71
 -5 2 -11 289.06 21.18
 5 2 11 337.61 20.11
 5 2 11 283.29 19.59
 -5 2 -11 247.99 19.48
 5 2 11 385.8 20.4
 -5 2 -11 273.88 20.62
 5 2 12 222.3 14.71
 5 2 12 234.68 14.96
 -5 2 -12 234.11 16.21
 5 2 12 240.34 15.25
 -5 2 -12 244.13 15.94
 -5 2 -13 5.46 3.35
 5 2 13 5.83 2.13
 5 2 13 5.75 1.56
 -5 3 16 134.54 7.82
 -5 3 16 121.42 8.09
 5 3 -16 134.25 8.44
 5 3 -15 13.22 4.62
 5 3 -15 28.68 3.85
 -5 3 15 15.55 3.15
 -5 3 15 14.22 2.57
 5 3 -15 17.13 3.6
 -5 3 15 21.51 2.96
 -5 3 15 20.13 3.27
 5 3 -15 9.12 4.41
 -5 3 15 21.54 3.6
 5 3 -14 201.33 14.24
 -5 3 14 191.4 13.58
 -5 3 14 203.5 13.43
 5 3 -14 181.66 13.58
 -5 3 14 186.73 12.93
 -5 3 14 201.97 13.25
 -5 3 13 15.73 3.37
 5 3 -13 23.39 5.03
 5 3 -13 21.84 6.6
 -5 3 13 22.13 4.39
 -5 3 13 20.73 3.75
 -5 3 12 15.68 3.41
 -5 3 12 19.34 3.49
 5 3 -12 25.27 5.18
 -5 3 12 18.19 4.14
 5 3 -12 29.02 6.77
 -5 3 12 23.07 3.96
 5 3 -11 92.95 9.12
 -5 3 11 60.43 5.92
 -5 3 11 84.84 7.09
 5 3 -11 69.21 7.4
 -5 3 11 56.96 5.87
 -5 3 11 63.7 6.62
 5 3 -11 79.23 8.6
 -5 3 11 73.16 6.44
 -5 3 10 70.72 6.43
 5 3 -10 78.51 7.72
 5 3 -10 78.9 8.66
 -5 3 10 78.98 7.12
 -5 3 10 86.89 7.02
 -5 3 9 18.69 2.96
 5 3 -9 28.27 5.92
 -5 3 9 16.66 3.15
 5 3 -9 28.92 4.9
 -5 3 9 15.86 3.3
 -5 3 8 121.91 9.09
 5 3 -8 112.23 10.33
 -5 3 8 147.37 9.86
 -5 3 8 165.6 9.89
 -5 3 7 136.21 9.72
 -5 3 7 147.21 9.74
 -5 3 6 185.02 11.87
 5 3 -5 41.51 4.55
 5 3 -4 55.36 6.19
 -5 3 3 466.04 23.69
 -5 3 3 467.45 24.12
 5 3 -3 444.63 23.63
 -5 3 2 1461.58 72.61
 5 3 -2 1521.93 72.64
 5 3 -2 1563.62 72.96
 -5 3 2 1386.79 72.27
 5 3 -2 1407.15 72.19
 5 3 -1 470.08 28.81
 5 3 -1 506.3 29.24
 -5 3 1 439.18 28.99
 5 3 -1 492.94 28.98
 -5 3 0 600.11 35.77
 5 3 0 597.68 35.9
 5 3 0 585.53 35.77
 -5 3 0 600.85 36.36
 5 3 0 607.05 35.72
 -5 3 -1 361.73 23.09
 5 3 1 367.53 22.65
 -5 3 -2 72.28 5.79
 5 3 3 238.45 14.71
 -5 3 -3 221.03 14.59
 5 3 4 108.11 7.54
 5 3 4 103.78 7.75
 -5 3 -4 117.21 8.39
 -5 3 -4 91.87 7.59
 5 3 5 45.16 4.69
 5 3 5 45.64 4.56
 5 3 5 45.93 4.39
 -5 3 -5 45.34 5.36
 5 3 6 166.56 11.32
 -5 3 -6 150.26 11.7
 -5 3 -6 173.94 12.35
 5 3 6 169.81 11.46
 -5 3 -7 105.26 9.47
 5 3 7 92.09 7.27
 5 3 7 96.54 7.62
 -5 3 -7 75.71 7.73
 -5 3 -7 83.41 8.2
 5 3 7 90.08 7.31
 -5 3 -8 19.43 5.99
 5 3 8 14.28 3.18
 5 3 8 17.27 3.54
 -5 3 -8 10.06 4.47
 -5 3 -8 9.8 3.83
 5 3 8 14.45 3.11
 5 3 8 15.88 3.6
 -5 3 -9 156.36 12.59
 -5 3 -9 138.74 11.3
 -5 3 -9 193.8 13.79
 5 3 9 159.45 10.68
 5 3 9 153.47 10.53
 -5 3 -9 107.54 10.31
 5 3 9 144.49 10.25
 -5 3 -10 39.96 8.22
 5 3 10 65.32 5.72
 -5 3 -10 61.27 7.99
 -5 3 -10 60.04 7.64
 -5 3 -10 58.73 7.56
 -5 3 -11 10.38 4.99
 5 3 11 6.07 2.53
 -5 3 -11 17.45 6.11
 -5 3 -11 3.47 4.76
 5 3 11 3.8 2.51
 -5 3 -11 8.01 4.96
 5 3 12 51.11 4.46
 5 3 12 55.28 4.7
 -5 3 -12 44.15 5.64
 5 3 12 58.18 4.84
 -5 3 -12 51.56 5.61
 -5 3 -13 9.66 2.52
 5 3 13 9.16 1.7
 5 4 -15 61.18 4.98
 -5 4 15 56.13 4.43
 5 4 -15 47.86 4.66
 5 4 -14 60.41 6.47
 5 4 -14 82.86 5.64
 5 4 -14 65.42 6.21
 -5 4 14 78.56 5.67
 -5 4 14 64.77 5.57
 -5 4 14 65.34 5.35
 -5 4 14 48.06 5.09
 5 4 -14 82.65 6.43
 5 4 -13 14.12 5.2
 -5 4 13 13.28 2.9
 -5 4 13 18.79 3.53
 5 4 -13 16.14 4.88
 -5 4 13 19.22 3.03
 5 4 -12 13.99 5.68
 -5 4 12 11.38 3.31
 -5 4 12 7.64 2.76
 5 4 -12 9.84 5.24
 -5 4 12 12.05 2.98
 5 4 -11 288.19 18.51
 -5 4 11 312.5 18.12
 -5 4 11 265.79 17.4
 5 4 -11 301.62 18.79
 5 4 -10 421.57 25.03
 -5 4 10 465.2 24.67
 5 4 -10 402.15 24.77
 -5 4 10 350.81 23.64
 -5 4 10 340.77 23.74
 5 4 -9 117.44 9.78
 -5 4 9 126.98 8.7
 -5 4 9 102.36 8.4
 -5 4 8 149.59 10.32
 -5 4 7 87.92 6.68
 -5 4 -2 61.04 5.43
 -5 4 -4 116.06 8.95
 5 4 5 154.67 10.09
 -5 4 -5 135.9 10.47
 5 4 6 283.37 16.61
 5 4 6 244.98 16
 -5 4 -6 219.25 16.42
 -5 4 -6 298.93 17.54
 -5 4 -7 53.62 6.74
 5 4 7 45.35 4.91
 5 4 7 43.02 4.57
 -5 4 -7 42.07 5.62
 -5 4 -8 12.82 5.07
 5 4 8 15.89 2.97
 -5 4 -8 10.46 3.68
 5 4 8 9.58 2.56
 -5 4 -9 13.09 4.57
 5 4 9 13.5 2.74
 -5 4 -9 7.67 6.32
 5 4 9 17.38 3.36
 -5 4 -9 8.78 5.31
 -5 4 -10 9.04 4.25
 5 4 10 4.5 2.28
 -5 4 -10 1.12 5.23
 5 4 10 4.06 2.29
 5 4 10 3.88 1.88
 -5 4 -10 2.25 4.06
 5 4 11 15.04 2.33
 -5 4 -11 16.47 4.22
 5 4 11 12.99 2.38
 5 4 11 9.85 2.24
 -5 4 -11 10.32 3.63
 -5 4 -11 10.13 3.47
 5 5 -13 19.87 3.09
 5 5 -13 33.15 3.11
 -5 5 13 16.28 2.25
 -5 5 13 26.7 2.59
 5 5 -13 13.47 2.57
 5 5 -12 65.9 5.76
 -5 5 12 60.68 4.93
 5 5 -12 52.63 5.25
 -5 5 12 64.55 5.08
 5 5 -11 38.11 5.26
 -5 5 11 42.3 4.13
 5 5 -11 46.27 4.91
 5 5 -10 43.68 5.53
 -5 5 10 34.13 3.95
 5 5 -10 40.33 4.85
 5 5 -9 10.29 4.51
 -5 5 9 11.58 2.67
 5 5 -9 16.44 4.01
 5 5 -8 85.82 7.4
 -5 5 8 72.07 6.22
 5 5 -8 81.11 6.82
 5 5 -7 36.35 5.07
 -5 5 7 34.83 3.73
 -5 5 -3 51.97 5.06
 -5 5 -5 48.1 5.19
 5 5 5 48.41 4.25
 -5 5 -6 13.18 4.26
 5 5 6 12.01 2.37
 -5 5 -6 14.01 3.19
 -5 5 -7 31.56 4.68
 5 5 7 27.75 3.02
 -5 5 -7 28.01 3.66
 -5 5 -8 146.15 10.33
 -5 5 -8 129.55 10.4
 5 5 8 127.1 9.14
 -5 5 -9 34.05 4.2
 5 5 9 37.87 3.44
 -5 5 -9 45.63 4.84
 -5 5 -9 33.83 3.97
 5 5 10 2.92 1.25
 5 5 10 5.96 1.21
 -5 5 -10 5.15 2.04
 5 6 -10 3.52 1.79
 5 6 -9 70.3 5.45
 5 6 -8 37.4 3.94
 -5 6 -4 17.96 3.09
 -5 6 -5 47.94 4.17
 -5 6 -6 42.9 4.1
 -5 6 -7 84.52 6.34
 6 -7 -2 23.2 2.4
 6 -7 -1 17.18 2.06
 6 -7 0 29.35 2.59
 6 -6 -10 46.54 4.3
 -6 -6 10 48.55 3.95
 -6 -6 10 51.01 3.87
 -6 -6 9 27.19 3.07
 6 -6 -9 26.13 3.66
 6 -6 -8 25.38 4.16
 -6 -6 8 29.64 3.62
 6 -6 -8 28.39 3.43
 6 -6 -7 15.19 3.95
 -6 -6 7 12.07 3
 -6 -6 7 16.54 3.02
 6 -6 -7 10.05 2.99
 6 -6 -6 165.02 11.99
 -6 -6 6 160.11 11.42
 6 -6 -6 172.17 11.42
 -6 -6 6 169.45 11.37
 6 -6 -5 41.31 5.49
 -6 -6 5 35.54 4.25
 -6 -6 5 41.56 4.33
 6 -6 -5 39.67 4.63
 6 -6 -4 120.07 9.75
 -6 -6 4 120.11 8.76
 -6 -6 4 118.76 8.86
 6 -6 -4 126.67 9.09
 -6 -6 3 55.78 5.08
 -6 -6 3 60.35 5.24
 6 -6 -3 57.02 6.48
 -6 -6 3 49.73 5.38
 6 -6 -3 54.55 5.41
 -6 -6 2 44.93 5.27
 6 -6 -2 45.79 6
 -6 -6 2 51.45 4.5
 6 -6 -2 47.65 4.98
 -6 -6 1 16.51 2.34
 6 -6 -1 12.65 4.22
 -6 -6 1 14.95 3.74
 6 -6 -1 10.39 3.26
 -6 -6 0 105.1 8.83
 6 -6 0 127.81 9.22
 6 -6 0 90.92 8.15
 6 -6 0 115.23 8.15
 -6 -6 -1 22.66 4.3
 6 -6 1 22.9 3.54
 -6 -6 -2 51.58 5.64
 6 -6 2 54.51 4.84
 6 -6 3 9.86 2.96
 6 -6 3 4.7 2.52
 -6 -6 -3 6.64 3.06
 6 -6 3 8.49 2.39
 6 -6 4 5.28 2.4
 6 -6 4 -0.12 2.18
 -6 -6 -4 2.81 2.7
 6 -6 4 2.8 2.14
 6 -6 5 45.91 3.55
 6 -6 5 27.86 3.57
 6 -6 6 74 5.19
 -6 -6 -6 91.71 5.9
 -6 -5 12 50.62 4.49
 -6 -5 12 53.98 4.27
 6 -5 -12 56.49 4.83
 -6 -5 11 26.76 3.73
 6 -5 -11 23.64 3.8
 -6 -5 10 66.9 6.59
 -6 -5 10 70.06 6.17
 6 -5 -10 78.68 6.88
 -6 -5 9 52.06 5.77
 -6 -5 9 42.91 5.13
 6 -5 -9 47.48 5.98
 -6 -5 8 21.67 4.5
 6 -5 -8 23.63 4.13
 -6 -5 8 28.95 4.42
 6 -5 -8 31.61 5.1
 -6 -5 7 29.47 5.3
 6 -5 -7 34.04 4.53
 6 -5 -7 30.78 5.31
 -6 -5 6 122.22 10.31
 6 -5 -6 146.21 9.7
 6 -5 -6 130.53 10.34
 -6 -5 6 104.44 9.25
 -6 -5 5 162.74 12.85
 -6 -5 5 175.79 13.21
 -6 -5 5 188.99 13.05
 6 -5 -5 192.39 13.35
 -6 -5 4 2.03 3.06
 -6 -5 4 1.49 3.13
 -6 -5 4 2.54 3.29
 6 -5 -4 6.49 3.92
 -6 -5 3 58.09 5.88
 -6 -5 3 49.14 5.76
 -6 -5 3 44.24 6.17
 6 -5 -3 50.44 6.15
 -6 -5 2 94.96 7.86
 -6 -5 2 95.87 7.97
 -6 -5 2 86.27 8.52
 6 -5 -2 90 8.21
 -6 -5 1 164.72 11.65
 -6 -5 1 159.45 12.63
 -6 -5 1 175.45 11.72
 6 -5 -1 151.09 11.94
 -6 -5 0 33.4 4.03
 -6 -5 0 38.99 5.6
 6 -5 0 28.68 4.6
 -6 -5 0 39.49 5.89
 6 -5 0 30.12 5.03
 -6 -5 -1 45.17 4.26
 -6 -5 -1 41.5 6.21
 6 -5 1 32.46 5.26
 -6 -5 -1 32.55 5.8
 6 -5 1 31.71 5.3
 6 -5 2 9.88 4.47
 6 -5 2 20.73 4.95
 -6 -5 -2 21.22 5.35
 6 -5 2 13.89 4.51
 -6 -5 -3 119.65 9.18
 6 -5 3 99.06 8.62
 6 -5 3 105.99 10.25
 6 -5 3 105.21 8.79
 -6 -5 -4 11.17 3.98
 6 -5 4 17.03 5.29
 6 -5 4 13.29 4.09
 6 -5 4 14.99 4.08
 -6 -5 -5 19.85 4.58
 6 -5 5 27.82 4.2
 6 -5 5 20.74 5.47
 -6 -5 -5 19.46 4.55
 6 -5 5 29.21 4.38
 -6 -5 -6 22.38 4.24
 6 -5 6 24.91 3.76
 6 -5 6 18.18 4.93
 -6 -5 -6 17.04 4.35
 6 -5 6 22.98 3.91
 6 -5 7 85.65 6.17
 6 -5 7 68.58 7.27
 -6 -5 -7 89.92 6.98
 6 -5 8 19.58 2.4
 6 -5 8 18.7 3.45
 -6 -5 -8 21.93 3.01
 6 -4 -15 30.18 3.37
 -6 -4 15 28.98 3.14
 6 -4 -15 32.6 3.09
 6 -4 -14 120.83 8.81
 -6 -4 14 114.12 8.65
 6 -4 -14 117.87 8.51
 6 -4 -13 19.97 3.86
 6 -4 -13 23.49 4.43
 -6 -4 13 19.77 3.93
 -6 -4 13 20.51 2.95
 6 -4 -13 24.65 4.15
 6 -4 -12 -0.7 3.91
 6 -4 -12 5.61 3.84
 -6 -4 12 4.84 3.77
 -6 -4 12 4.9 3.09
 -6 -4 12 1.56 2.7
 -6 -4 12 3.7 2.19
 6 -4 -12 -1.52 3.75
 6 -4 -11 83.46 8.13
 -6 -4 11 82.22 7.92
 6 -4 -11 74.54 7.98
 -6 -4 11 63.2 7.55
 -6 -4 11 74.82 7.13
 -6 -4 11 72.56 6.46
 6 -4 -11 74.12 7.62
 -6 -4 10 11.95 4.59
 6 -4 -10 9.58 4.61
 6 -4 -10 11.31 5.16
 -6 -4 10 6.46 4.26
 -6 -4 10 11.62 4.28
 6 -4 -10 8.3 4.28
 -6 -4 10 9.13 3.18
 6 -4 -10 10.07 4.7
 6 -4 -9 235.38 16.82
 -6 -4 9 231.22 16.05
 6 -4 -9 217.77 16.15
 6 -4 -9 270.3 16.39
 -6 -4 9 201 16.59
 -6 -4 9 220.87 16.22
 -6 -4 9 196.07 14.92
 6 -4 -9 232.24 16.16
 6 -4 -8 3.43 4.64
 6 -4 -8 3.4 3.73
 6 -4 -8 -0.84 4.73
 6 -4 -8 1.38 3.34
 -6 -4 8 3.97 4.38
 -6 -4 8 -2 3.82
 -6 -4 8 3.15 4.26
 6 -4 -8 2.84 4.42
 -6 -4 8 4.9 3.42
 6 -4 -7 177.1 12.44
 6 -4 -7 157.73 13.45
 6 -4 -7 170.64 13.23
 -6 -4 7 165.53 13.03
 -6 -4 7 170.34 13.78
 -6 -4 7 164.83 12.86
 6 -4 -7 163.96 12.46
 6 -4 -7 175.12 12.91
 -6 -4 6 342.33 21.98
 6 -4 -6 320.16 21.36
 -6 -4 6 306.97 20.74
 6 -4 -6 310.39 20.98
 6 -4 -6 337.02 20.29
 -6 -4 6 307.4 20.8
 6 -4 -6 348.58 20.64
 -6 -4 6 264.88 19.98
 6 -4 -6 297.76 20.57
 -6 -4 5 46.46 5.9
 6 -4 -5 47.83 5.69
 6 -4 -5 31.71 5.99
 -6 -4 5 49.05 6.76
 -6 -4 5 45.2 6.06
 6 -4 -5 53.32 5.3
 6 -4 -5 46.41 6.53
 6 -4 -5 46.51 6.13
 -6 -4 4 206.54 15.1
 6 -4 -4 211.55 15.24
 -6 -4 4 211.6 15.81
 6 -4 -4 207.76 14.55
 6 -4 -4 220.65 13.96
 6 -4 -4 225.91 15.03
 -6 -4 4 215.49 15
 -6 -4 4 196.16 14.36
 6 -4 -4 204.28 14.78
 6 -4 -3 290.41 17.98
 -6 -4 3 246.37 18.09
 6 -4 -3 265.36 17.95
 6 -4 -3 267.32 18.36
 -6 -4 3 276.03 19
 -6 -4 3 259.59 17.76
 6 -4 -3 295.1 18.44
 -6 -4 3 254.95 17.43
 -6 -4 2 175.23 12.97
 -6 -4 2 193.07 13.6
 -6 -4 2 172.35 12.78
 6 -4 -2 170.07 13.14
 -6 -4 2 179.59 13.96
 6 -4 -2 203.65 13.65
 -6 -4 2 180.71 12.38
 6 -4 -2 170.02 12.72
 -6 -4 2 164.21 12.46
 -6 -4 1 49.91 6.17
 -6 -4 1 52.32 6.56
 6 -4 -1 48.5 6.33
 -6 -4 1 53.09 5.55
 6 -4 -1 42.33 5.15
 -6 -4 1 52.27 5.29
 6 -4 -1 53.68 6.52
 6 -4 -1 47.02 6.04
 6 -4 0 145.04 12
 -6 -4 0 149.35 11.04
 -6 -4 0 174.13 12.57
 6 -4 0 148.51 11.69
 6 -4 0 166.93 12.47
 -6 -4 0 169.01 11.24
 6 -4 0 145.5 11.69
 6 -4 1 193.06 14.53
 -6 -4 -1 222.15 14.62
 -6 -4 -1 217.59 15.63
 6 -4 1 204.38 14.99
 -6 -4 -1 225.98 14.09
 6 -4 1 185.82 15.29
 6 -4 1 212.06 15.52
 -6 -4 -2 27.73 4.97
 -6 -4 -2 29.26 5.72
 6 -4 2 33.26 6.08
 6 -4 2 38.28 5.94
 -6 -4 -2 37.08 3.92
 6 -4 2 32.5 6.65
 6 -4 2 26.6 5.08
 -6 -4 -3 22.1 5.04
 -6 -4 -3 29.02 5.81
 6 -4 3 24.21 3.89
 6 -4 3 19.54 4.78
 6 -4 3 22.56 5.78
 -6 -4 -3 26.67 5.46
 6 -4 3 32.1 6.47
 6 -4 3 22.2 5.13
 -6 -4 -4 108.13 9.25
 -6 -4 -4 94.72 9.55
 6 -4 4 100.24 8.6
 6 -4 4 79.38 7.66
 -6 -4 -4 94.94 8.97
 6 -4 4 72.62 7.54
 -6 -4 -4 90.45 7.94
 6 -4 4 103.67 9.95
 -6 -4 -5 267.09 17.62
 6 -4 5 218.37 16.41
 -6 -4 -5 252.26 17.27
 6 -4 5 263.61 18.23
 6 -4 5 253.74 16.55
 -6 -4 -5 209.12 16.33
 6 -4 5 248.68 15.73
 -6 -4 -6 29.34 6.5
 6 -4 6 38.08 4.53
 6 -4 6 21.41 5.7
 6 -4 6 27.31 4.74
 -6 -4 -6 27.51 5.7
 -6 -4 -6 31.03 5.36
 -6 -4 -6 36.94 5.66
 6 -4 6 44.37 5.64
 -6 -4 -7 3.64 4.14
 6 -4 7 3.97 3.18
 -6 -4 -7 4.24 3.71
 6 -4 7 4.4 3.34
 -6 -4 -7 5.28 3.77
 6 -4 7 8.3 4.18
 -6 -4 -8 41.29 5.76
 -6 -4 -8 43.18 5.36
 6 -4 8 45.96 4.28
 6 -4 8 34.07 4.73
 6 -4 8 34.28 5.85
 -6 -4 -8 42.27 4.9
 -6 -4 -9 54.58 5.79
 6 -4 9 44.79 4.85
 -6 -4 -9 53.17 5.35
 -6 -4 -9 56 4.76
 6 -4 9 43.93 5.48
 6 -4 10 11.9 2.4
 6 -4 10 11.88 3
 -6 -4 -10 11.77 2.61
 6 -4 11 35.33 2.96
 6 -3 -16 19.59 2.76
 6 -3 -16 19.91 3.19
 6 -3 -16 15.65 2.92
 6 -3 -15 92.69 7.58
 6 -3 -15 108.17 7.92
 6 -3 -15 111.5 7.95
 -6 -3 14 112.93 10.13
 6 -3 -14 141.83 10.87
 6 -3 -14 146.94 10.76
 6 -3 -14 144.25 10.68
 6 -3 -13 16.33 5.2
 -6 -3 13 8.24 3.88
 6 -3 -13 13.49 4.61
 6 -3 -13 10.25 4.5
 6 -3 -12 27.14 6.06
 6 -3 -12 20.51 5.3
 -6 -3 12 21.73 5.72
 -6 -3 12 23.07 3.78
 -6 -3 12 20.47 5.33
 -6 -3 12 23.86 3.18
 6 -3 -12 20.42 5.43
 6 -3 -11 53.88 5.68
 6 -3 -11 54.35 7.52
 -6 -3 11 46.39 6.72
 -6 -3 11 45.88 5.51
 6 -3 -11 46.28 6.57
 -6 -3 11 47.69 7.36
 -6 -3 11 49.14 4.9
 6 -3 -11 50.62 6.86
 6 -3 -10 215.8 14.68
 6 -3 -10 226 16.15
 6 -3 -10 207.76 15.17
 -6 -3 10 204.58 16.4
 -6 -3 10 189.69 14.43
 -6 -3 10 195.43 15.15
 6 -3 -10 227.77 15.21
 6 -3 -10 208.26 15.26
 6 -3 -9 64.68 7.57
 -6 -3 9 42.19 5.73
 6 -3 -9 44.11 6.47
 6 -3 -9 54.13 6.19
 -6 -3 9 53.33 6.19
 -6 -3 9 50.86 7.1
 -6 -3 9 61.06 6.72
 6 -3 -9 58.88 6.51
 6 -3 -9 48.13 6.57
 -6 -3 8 78.39 7.99
 6 -3 -8 92.28 9.04
 -6 -3 8 90.12 8.35
 6 -3 -8 95.78 8.72
 -6 -3 8 105.91 9.48
 -6 -3 8 77.38 8
 6 -3 -8 104.43 8.32
 6 -3 -8 86.91 8.31
 6 -3 -8 79.93 7.88
 6 -3 -7 142.62 11.51
 -6 -3 7 135.3 10.78
 6 -3 -7 138.88 10.75
 -6 -3 7 137.38 11.49
 6 -3 -7 150.49 10.81
 -6 -3 7 124.83 10.52
 6 -3 -7 139.82 10.39
 6 -3 -7 141.18 10.99
 -6 -3 7 132.66 10.8
 6 -3 -6 262.46 18.6
 -6 -3 6 246.93 18.21
 -6 -3 6 323.93 16.7
 6 -3 -6 270.82 17.85
 6 -3 -6 272.47 18.21
 -6 -3 6 265.28 18.85
 -6 -3 6 267.06 18.18
 6 -3 -6 267.15 17.6
 6 -3 -6 270.4 17.89
 -6 -3 6 255.21 18.06
 6 -3 -6 263.89 18.07
 -6 -3 5 250.26 17.34
 6 -3 -5 236.97 17.09
 -6 -3 5 236.56 16.74
 6 -3 -5 260.51 16.41
 6 -3 -5 259.94 16.09
 6 -3 -5 244.47 16.59
 -6 -3 5 245.47 16.67
 -6 -3 5 251.2 16.8
 6 -3 -5 260.32 16.68
 6 -3 -5 246.94 16.5
 6 -3 -4 8.96 3.43
 6 -3 -4 7.71 3.52
 -6 -3 4 8.3 3.47
 6 -3 -4 10.05 4
 -6 -3 4 8.24 3.76
 6 -3 -4 8.79 3.33
 6 -3 -4 3.21 2.92
 -6 -3 4 7.89 2.83
 6 -3 -4 9.36 2.52
 -6 -3 4 6.76 3.16
 6 -3 -3 24.94 3.54
 -6 -3 3 22.74 3.86
 6 -3 -3 24.5 4.33
 -6 -3 3 24.84 4.38
 6 -3 -3 29.48 4.84
 -6 -3 3 27.74 3.97
 6 -3 -3 26.04 4.36
 -6 -3 3 22.08 4.67
 -6 -3 3 25.26 4.05
 -6 -3 3 27.04 3.69
 6 -3 -3 28.86 4.15
 -6 -3 2 96.06 7.96
 -6 -3 2 95.08 8.19
 6 -3 -2 100.04 7.4
 -6 -3 2 103.61 8.9
 -6 -3 2 87.64 7.67
 6 -3 -2 93.02 7.48
 -6 -3 2 84.85 7.34
 6 -3 -2 91.95 7.89
 -6 -3 2 92.1 7.2
 6 -3 -2 92.69 8.33
 6 -3 -2 87.15 7.69
 -6 -3 1 480.96 30.88
 -6 -3 1 496.92 31.11
 6 -3 -1 524.11 30.7
 -6 -3 1 488.03 31.14
 6 -3 -1 513.44 30.59
 6 -3 -1 493.7 30.6
 -6 -3 1 576.87 32.28
 -6 -3 1 493.72 30.35
 6 -3 -1 492.28 30.31
 6 -3 -1 500.74 30.87
 -6 -3 1 534.96 30.3
 -6 -3 0 193.55 13.95
 -6 -3 0 215.59 13.12
 -6 -3 0 198.16 13.37
 -6 -3 0 201.57 14.19
 -6 -3 0 193.64 14.16
 -6 -3 0 202.22 13.13
 6 -3 0 197.6 13.34
 6 -3 0 190.08 13.42
 6 -3 0 198.06 13.93
 6 -3 0 183.61 13.73
 -6 -3 -1 63.61 6.37
 -6 -3 -1 54.49 6.51
 6 -3 1 62.66 6.01
 6 -3 1 55.02 6.13
 -6 -3 -1 65.18 5.35
 6 -3 1 57.95 6.39
 6 -3 1 53.58 6.36
 -6 -3 -1 57.48 6.36
 6 -3 2 16.27 4.28
 -6 -3 -2 18.02 4.37
 -6 -3 -2 13.52 4.29
 6 -3 2 15.66 3.75
 6 -3 2 11.2 3.07
 -6 -3 -2 13.69 2.61
 6 -3 2 13.26 3.99
 -6 -3 -2 13.14 3.61
 -6 -3 -2 14.53 4.39
 -6 -3 -3 427.21 26.11
 -6 -3 -3 384.71 25.48
 6 -3 3 395.18 24.87
 6 -3 3 408.41 25.76
 6 -3 3 406.39 25.61
 -6 -3 -3 370.49 24.89
 -6 -3 -3 398.62 25.23
 -6 -3 -4 60.1 7.27
 -6 -3 -4 65.7 6.63
 6 -3 4 44.64 5.57
 6 -3 4 56.39 6.22
 -6 -3 -4 63.81 7.03
 6 -3 4 71.54 7.38
 6 -3 4 67.51 7.95
 -6 -3 -5 7.3 4.88
 -6 -3 -5 8.16 5.11
 6 -3 5 7.48 4.64
 6 -3 5 10.45 3.53
 6 -3 5 11.66 3.95
 -6 -3 -5 3.95 4.53
 -6 -3 -5 9.82 3.94
 6 -3 5 15.47 5.67
 -6 -3 -6 65.52 7.84
 -6 -3 -6 66.65 7.91
 6 -3 6 61.19 5.73
 6 -3 6 57.11 6.76
 -6 -3 -6 66.09 7.67
 -6 -3 -6 59.74 6.73
 -6 -3 -7 94.99 9.87
 -6 -3 -7 107.2 10.03
 6 -3 7 96.59 9.47
 6 -3 7 105.78 7.82
 6 -3 7 97.98 8.9
 -6 -3 -7 106.64 9.72
 -6 -3 -7 98.24 8.48
 6 -3 7 102.07 8.9
 6 -3 8 3.25 2.69
 6 -3 8 3.1 4.4
 6 -3 8 0.39 3.77
 -6 -3 -8 0.2 4.4
 -6 -3 -8 2.01 2.95
 -6 -3 -9 95.7 8.99
 6 -3 9 96.8 8.79
 6 -3 9 88.88 8.27
 -6 -3 -9 99.99 8.82
 -6 -3 -10 101.15 8.49
 6 -3 10 87.9 7.79
 6 -3 10 93.27 8.25
 -6 -3 -10 92.43 8.08
 -6 -3 -11 14.67 3.58
 6 -3 11 13.15 2.97
 6 -3 11 7.02 2.86
 -6 -3 -11 14.46 3.36
 -6 -3 -12 27.36 3.12
 -6 -3 -12 27.67 3.17
 6 -2 -17 47.93 4.85
 6 -2 -17 57.86 4.77
 -6 -2 17 60.16 4.96
 6 -2 -16 36.27 4.99
 -6 -2 16 25.84 4.13
 -6 -2 16 33.02 4.48
 6 -2 -15 5.37 4.76
 -6 -2 15 2.61 3.5
 -6 -2 15 6.6 3.44
 -6 -2 15 2.9 3.62
 -6 -2 14 53.13 6.86
 6 -2 -14 42.16 6.8
 6 -2 -14 34.21 7.05
 -6 -2 14 46.28 6.15
 -6 -2 14 48.35 6.32
 6 -2 -13 5.59 5.24
 6 -2 -13 10.65 6.02
 -6 -2 13 7.2 5.31
 -6 -2 13 7.32 4.55
 -6 -2 13 7.35 4.2
 6 -2 -13 6.98 3.3
 6 -2 -12 34.76 6.59
 6 -2 -12 43.28 5.36
 -6 -2 12 37.1 4.83
 -6 -2 12 39.75 6.35
 -6 -2 12 53.86 7.48
 -6 -2 12 32.35 5.77
 6 -2 -12 43.66 7.48
 6 -2 -11 32.99 6.26
 -6 -2 11 34.68 6.64
 -6 -2 11 38.32 5.95
 -6 -2 11 32.46 4.89
 6 -2 -11 31.37 6.92
 -6 -2 11 39 4.35
 6 -2 -11 37.43 5.1
 -6 -2 11 39 6.09
 6 -2 -10 12.57 4.97
 -6 -2 10 18.19 3.9
 6 -2 -10 18.38 5.97
 -6 -2 10 20.44 4.87
 6 -2 -10 17.73 4.23
 -6 -2 10 19.53 4.4
 -6 -2 10 12.56 3.2
 -6 -2 10 16.71 2.86
 -6 -2 10 21.48 4.84
 6 -2 -9 215.53 15.59
 -6 -2 9 212.16 15.32
 6 -2 -9 233.36 16.38
 -6 -2 9 220.39 15.59
 -6 -2 9 236.44 16.74
 6 -2 -9 241.54 15.38
 -6 -2 9 208.44 14.75
 -6 -2 9 230.77 15.64
 6 -2 -8 440.3 26.17
 6 -2 -8 400.14 26.2
 -6 -2 8 413.39 26.3
 6 -2 -8 416.01 26.9
 -6 -2 8 392.11 26.28
 -6 -2 8 454.8 27.47
 -6 -2 8 387.95 25.76
 -6 -2 8 450.83 26.57
 6 -2 -8 491.34 26.27
 6 -2 -8 399.05 26.22
 -6 -2 7 506.45 31
 6 -2 -7 519.81 30.18
 6 -2 -7 502.43 29.85
 -6 -2 7 466.1 30
 6 -2 -7 489.96 30.59
 -6 -2 7 456.29 29.97
 -6 -2 7 455.21 29.62
 -6 -2 7 511.13 30.13
 6 -2 -7 597.86 30.08
 6 -2 -7 437.48 29.62
 6 -2 -7 514.68 30.06
 -6 -2 6 287.81 18.93
 -6 -2 6 311.61 18.69
 -6 -2 6 260.85 18.1
 6 -2 -6 282.42 18.73
 6 -2 -6 294.92 18.06
 -6 -2 6 297.35 18.28
 6 -2 -6 282.32 17.99
 6 -2 -6 301.22 17.79
 6 -2 -6 283.97 18.11
 6 -2 -6 275.65 17.95
 -6 -2 6 252.39 17.75
 6 -2 -6 287.72 18.11
 -6 -2 5 318.44 19.86
 6 -2 -5 333.03 19.75
 -6 -2 5 288.49 19.78
 6 -2 -5 308.95 20.27
 6 -2 -5 330.96 19.66
 6 -2 -5 317.74 19.67
 -6 -2 5 312.63 20.49
 -6 -2 5 321.96 19.76
 -6 -2 5 331.15 20.03
 -6 -2 5 332.72 20.19
 6 -2 -5 339.63 19.51
 6 -2 -5 322.15 19.88
 -6 -2 5 286.62 19.19
 6 -2 -5 308.17 19.7
 -6 -2 4 769.68 44.83
 6 -2 -4 731.63 44.43
 -6 -2 4 705.57 44.76
 -6 -2 4 816.97 45.04
 -6 -2 4 781.52 45.17
 -6 -2 4 735.48 44.51
 6 -2 -4 765.57 44.46
 -6 -2 4 809.33 44.94
 6 -2 -4 789.6 44.4
 6 -2 -4 831.54 44.31
 6 -2 -4 743.9 44.69
 -6 -2 4 711.51 44.18
 6 -2 -4 778.27 44.63
 -6 -2 3 1547.51 92.73
 -6 -2 3 1654.47 92.94
 -6 -2 3 1681.43 92.77
 6 -2 -3 1558.23 92.27
 6 -2 -3 1613.25 92.29
 6 -2 -3 1734.5 92.13
 -6 -2 3 1831.17 92.99
 6 -2 -3 1528.23 92.49
 -6 -2 3 1601.58 92.73
 -6 -2 3 1548.97 92.1
 6 -2 -3 1617.4 92.42
 6 -2 -2 17.24 3.41
 6 -2 -2 18.51 3.09
 -6 -2 2 16.47 3.46
 -6 -2 2 18.91 3.56
 -6 -2 2 20.44 2.78
 -6 -2 2 17.88 3.44
 -6 -2 2 17.45 2.48
 -6 -2 2 20.41 4.03
 6 -2 -2 17.02 2
 -6 -2 2 16.42 2.79
 6 -2 -2 16.68 3.19
 6 -2 -1 6.07 2.54
 6 -2 -1 6.21 2.95
 -6 -2 1 9.21 3.09
 -6 -2 1 4.34 1.69
 -6 -2 1 7.07 2.92
 6 -2 -1 3.34 0.99
 -6 -2 1 4.09 1.54
 -6 -2 1 6.58 3.06
 6 -2 -1 5.93 2.61
 -6 -2 1 7.99 2.28
 -6 -2 1 5.21 1.9
 6 -2 -1 4.7 1.14
 6 -2 -1 4.92 1.29
 6 -2 -1 6.05 2.45
 6 -2 -1 4.54 2.57
 -6 -2 0 749.23 44.32
 -6 -2 0 745.46 44.39
 6 -2 0 717.79 43.91
 -6 -2 0 770.89 44.72
 -6 -2 0 719.69 44
 -6 -2 0 792.15 44.74
 -6 -2 0 781.46 44.76
 6 -2 0 723.42 43.86
 6 -2 0 744.3 43.89
 -6 -2 0 842.46 45.28
 -6 -2 0 787.26 43.9
 6 -2 0 777.53 44.06
 6 -2 0 779.87 44.2
 6 -2 0 731.51 43.95
 6 -2 0 762.35 45.76
 -6 -2 -1 397.67 24.98
 -6 -2 -1 405.84 25.1
 -6 -2 -1 427.79 25.55
 -6 -2 -1 414.15 25.41
 6 -2 1 378.4 24.48
 6 -2 1 419.31 24.75
 -6 -2 -1 451.45 24.5
 -6 -2 -1 423.07 25.56
 6 -2 1 377.68 25.01
 6 -2 1 430.54 25.48
 6 -2 1 383.61 24.55
 6 -2 1 402.39 26.52
 6 -2 1 413.07 24.63
 -6 -2 -2 196.91 13.88
 -6 -2 -2 202.26 14.28
 6 -2 2 207.62 14.22
 6 -2 2 203.43 14.67
 -6 -2 -2 214.35 14.51
 6 -2 2 206.71 13.63
 6 -2 2 205.02 13.7
 -6 -2 -2 247.62 13.49
 6 -2 2 194.87 13.54
 -6 -2 -3 177.86 12.56
 -6 -2 -3 173.91 12.64
 6 -2 3 153.39 11.51
 6 -2 3 181.99 12.45
 -6 -2 -3 180.89 12.86
 6 -2 3 171 11.15
 6 -2 3 173.16 11.78
 6 -2 3 166.56 11.59
 -6 -2 -4 194.08 12.87
 -6 -2 -4 179.05 12.94
 -6 -2 -4 199.83 13.25
 6 -2 4 146.73 10.87
 6 -2 4 178.75 11.88
 6 -2 4 172.92 12.03
 6 -2 4 158.9 11.23
 6 -2 4 176.77 12.51
 -6 -2 -4 167.88 12.59
 -6 -2 -4 177.61 11.99
 6 -2 4 158.11 11.6
 -6 -2 -5 339.64 22.31
 -6 -2 -5 344.14 22.39
 -6 -2 -5 341.92 21.28
 6 -2 5 329.77 20.31
 6 -2 5 331.17 21.46
 6 -2 5 352.59 21.97
 -6 -2 -5 323.65 22.03
 6 -2 5 341.4 21.11
 6 -2 6 49.45 4.73
 -6 -2 -6 50.04 6.41
 6 -2 6 42.9 5.67
 6 -2 6 47.71 5.63
 -6 -2 -6 45.6 5.18
 -6 -2 -6 50.48 7
 -6 -2 -7 34.07 6.43
 -6 -2 -7 28.4 5.39
 6 -2 7 30.15 3.65
 6 -2 7 29.05 5.1
 6 -2 7 33.77 5.57
 -6 -2 -7 24.79 6.4
 -6 -2 -7 24.55 3.87
 6 -2 7 39.34 5.37
 -6 -2 -8 144.15 11.81
 -6 -2 -8 126.38 10.9
 6 -2 8 122.73 10.81
 6 -2 8 134.63 11.15
 -6 -2 -8 143.39 11.7
 -6 -2 -9 238.79 16.19
 6 -2 9 236.92 15.57
 -6 -2 -9 233.14 15.96
 -6 -2 -10 18.56 5.07
 6 -2 10 16.07 4.07
 6 -2 10 19.73 3.26
 -6 -2 -10 22.8 5.83
 -6 -2 -11 95.27 7.58
 6 -2 11 82.57 7.24
 -6 -2 -12 36.02 4.06
 6 -2 12 30.16 3.96
 6 -2 13 19.07 2.37
 -6 -2 -13 26.52 3.08
 6 -1 -18 -0.18 1.79
 6 -1 -18 3.09 1.73
 -6 -1 17 26.79 4.08
 -6 -1 17 30.89 3.97
 6 -1 -17 27.45 4.7
 -6 -1 17 29.69 3.63
 6 -1 -17 26.95 4.12
 6 -1 -16 43.97 5.55
 6 -1 -16 39.28 6.43
 -6 -1 16 41.76 5.02
 -6 -1 16 41.39 5.8
 -6 -1 16 34.74 5.16
 6 -1 -15 4.68 4.47
 -6 -1 15 5.51 3.69
 6 -1 -15 2.19 5.66
 6 -1 -15 0.83 3.1
 -6 -1 15 2.28 4.59
 -6 -1 15 3.37 4.21
 6 -1 -14 148.13 11.44
 6 -1 -14 165.12 13.03
 6 -1 -14 129.61 10.25
 -6 -1 14 156.34 11.51
 6 -1 -13 60.9 7.41
 -6 -1 13 52.72 5.78
 6 -1 -13 61.77 8.5
 6 -1 -13 50.5 6.38
 -6 -1 13 59.78 6.93
 6 -1 -12 160.36 12.12
 -6 -1 12 134.34 10.88
 6 -1 -12 142.21 11.39
 -6 -1 12 165.01 12.12
 6 -1 -11 46.39 5.95
 -6 -1 11 34.78 4.79
 6 -1 -11 32.04 5.5
 -6 -1 11 47.17 5.86
 6 -1 -10 124.76 10.14
 -6 -1 10 117.63 9.66
 6 -1 -10 123.28 9.88
 -6 -1 10 139.76 10.41
 6 -1 -10 131.32 9.33
 6 -1 -9 389.32 23.32
 -6 -1 9 359.18 23.06
 -6 -1 9 400.45 23.65
 -6 -1 9 328.9 22.2
 6 -1 -9 368.82 23.03
 -6 -1 9 409.52 23.66
 6 -1 -9 381.37 22.87
 6 -1 -8 201.63 13.11
 -6 -1 8 190.29 12.94
 6 -1 -8 180.7 13.7
 -6 -1 8 201.94 13.32
 -6 -1 8 173.96 12.19
 6 -1 -8 191.15 12.95
 -6 -1 8 176.51 12.14
 -6 -1 8 209.9 13.59
 -6 -1 8 208.7 13.25
 6 -1 -8 203.73 14.09
 6 -1 -8 201.44 13.62
 6 -1 -8 195.13 12.8
 6 -1 -7 41.63 4.55
 -6 -1 7 37.36 4.11
 -6 -1 7 33.28 4.12
 -6 -1 7 34.56 3.49
 -6 -1 7 39.33 4.35
 6 -1 -7 39.17 5.17
 -6 -1 7 33.68 3.53
 6 -1 -7 38.71 4.56
 -6 -1 7 42 4.5
 6 -1 -7 41.17 4.39
 -6 -1 7 41.81 4.31
 6 -1 -7 37.91 4.43
 -6 -1 7 32.68 3.19
 6 -1 -7 38.88 4.27
 -6 -1 6 144.23 10.1
 -6 -1 6 115.92 8.9
 6 -1 -6 135 9.48
 -6 -1 6 119.77 9.34
 6 -1 -6 148.99 10.39
 -6 -1 6 139.75 9.7
 6 -1 -6 137.77 9.86
 -6 -1 6 144.85 9.77
 -6 -1 6 123.33 9
 -6 -1 6 163.06 10.52
 -6 -1 6 145.64 9.6
 6 -1 -6 162.97 9.65
 6 -1 -6 143.12 8.46
 6 -1 -6 146.26 10.24
 6 -1 -6 132.24 9.43
 6 -1 -6 126.53 9.49
 6 -1 -5 315.13 19.96
 -6 -1 5 287.91 19.19
 6 -1 -5 314.38 19.76
 -6 -1 5 327.09 19.9
 -6 -1 5 323.27 19.75
 -6 -1 5 305.8 19.35
 -6 -1 5 340.49 20
 -6 -1 5 299.11 19.33
 6 -1 -5 339.8 19.36
 6 -1 -5 329.9 19.72
 -6 -1 5 322.59 19.3
 6 -1 -5 306.31 19.23
 6 -1 -5 327.76 19.61
 6 -1 -5 294.97 19.05
 6 -1 -4 832.18 47.36
 6 -1 -4 901.23 46.84
 -6 -1 4 865.17 47.24
 6 -1 -4 753.84 46.33
 6 -1 -4 807.82 46.83
 6 -1 -4 753.18 45.96
 6 -1 -4 863.11 47.02
 6 -1 -4 733.35 46.41
 -6 -1 4 869.35 47.25
 6 -1 -3 11.98 2.34
 6 -1 -3 13.22 2.36
 -6 -1 3 14.62 1.81
 -6 -1 3 13.99 2.54
 6 -1 -3 14.07 2.43
 6 -1 -3 10.35 2.02
 6 -1 -2 209.02 12.3
 6 -1 -2 198.45 13.27
 -6 -1 2 202.71 13.26
 -6 -1 2 208.14 12.42
 -6 -1 2 197.6 13.28
 -6 -1 1 577.92 33.94
 6 -1 -1 588.85 33.12
 6 -1 -1 541.07 34.01
 6 -1 0 1012.65 56.95
 -6 -1 0 946.26 57.5
 -6 -1 0 1116.03 56.97
 6 -1 0 921.3 57.13
 -6 -1 0 1022.65 57.19
 6 -1 0 940.36 56.89
 -6 -1 -1 170.41 11.24
 6 -1 1 158.6 10.57
 6 -1 1 158.8 10.54
 -6 -1 -1 171.66 10.97
 6 -1 1 146.56 10.06
 6 -1 1 154.55 10.93
 6 -1 1 156.27 10.35
 6 -1 1 162.02 10.83
 -6 -1 -1 167.21 10.79
 -6 -1 -1 165.26 10.56
 6 -1 1 156.34 10.27
 6 -1 1 164.63 11.95
 6 -1 2 362.61 22.68
 -6 -1 -2 415.75 23.28
 -6 -1 -2 387.94 23.2
 6 -1 2 350.87 22.44
 -6 -1 -2 409.39 22.89
 6 -1 2 364.17 23.04
 6 -1 2 335.25 21.97
 6 -1 2 368.73 22.36
 6 -1 2 370.01 21.82
 -6 -1 -2 346.59 22.43
 -6 -1 -2 381.21 22.42
 6 -1 2 374.28 21.99
 6 -1 2 366.66 22.6
 -6 -1 -2 384.9 22.82
 -6 -1 -2 390.39 22.53
 6 -1 2 364.15 22.06
 6 -1 2 378.48 24.16
 -6 -1 -3 619.53 34.88
 -6 -1 -3 642.39 35.12
 6 -1 3 521.77 34.3
 -6 -1 -3 582.96 34.7
 -6 -1 -3 632.91 34.69
 6 -1 3 547.06 34.91
 6 -1 3 553.72 34.19
 6 -1 3 573.86 34.09
 -6 -1 -3 638.51 35.12
 -6 -1 -3 603.96 34.59
 6 -1 3 570.95 34.38
 6 -1 3 572.81 33.87
 6 -1 3 557.72 33.62
 -6 -1 -3 591 34.52
 -6 -1 -3 585.76 34.34
 6 -1 3 590.83 36.36
 6 -1 3 573.98 33.84
 6 -1 3 568.79 33.69
 -6 -1 -4 94.23 7.54
 6 -1 4 75.2 7.04
 6 -1 4 79.65 6.04
 6 -1 4 75.57 5.73
 6 -1 4 78.37 6.39
 6 -1 4 76.72 5.95
 -6 -1 -4 94.69 7.47
 -6 -1 -4 83.68 7.29
 6 -1 4 76.51 6.19
 6 -1 4 76.73 6.7
 6 -1 4 84.62 6.34
 -6 -1 -5 26.52 4.42
 -6 -1 -5 27.77 5.16
 -6 -1 -5 27.21 4.64
 6 -1 5 26.86 3.44
 6 -1 5 28.97 3.94
 -6 -1 -5 26.64 4.63
 6 -1 5 25.59 3.05
 -6 -1 -5 29.74 5.31
 6 -1 5 28.01 3.65
 6 -1 5 28.78 3.46
 6 -1 5 36.14 4.01
 6 -1 5 31.84 4.32
 -6 -1 -6 46.96 6.49
 -6 -1 -6 48.94 5.65
 6 -1 6 54.16 5.14
 6 -1 6 36.16 4.1
 6 -1 6 46.35 4.89
 -6 -1 -6 51.74 6.94
 6 -1 6 42.25 4.86
 -6 -1 -7 204.04 14.99
 -6 -1 -7 195.28 13.9
 6 -1 7 187.36 13.49
 -6 -1 -8 171.26 13.2
 -6 -1 -8 163.64 11.98
 6 -1 8 159.39 12.46
 -6 -1 -9 93.78 9.07
 6 -1 9 85.79 8.39
 6 -1 9 83.5 8.05
 -6 -1 -10 421.21 25.6
 6 -1 10 424.28 25.51
 6 -1 10 352.31 24.64
 -6 -1 -10 396.65 26.04
 -6 -1 -11 43.43 5.62
 6 -1 11 50.66 5.89
 -6 -1 -11 57.44 6.97
 -6 -1 -12 5.78 2.53
 6 -1 12 5.29 2.88
 6 -1 12 3.22 2.29
 -6 -1 -12 1.98 3.75
 6 -1 13 39.08 3.74
 6 -1 13 32.24 3.42
 -6 0 18 0.19 1.76
 -6 0 18 1.89 1.99
 6 0 -18 0.88 1.66
 -6 0 17 -0.14 2.65
 6 0 -17 -2.06 2.42
 6 0 -17 2.74 2.13
 -6 0 17 3.59 3.5
 -6 0 17 2.43 1.98
 6 0 -16 18.63 3.82
 6 0 -16 12.18 3.81
 -6 0 16 12.35 2.79
 -6 0 16 16.78 4.13
 -6 0 16 15.29 3.33
 6 0 -15 -0.17 3.8
 -6 0 15 3.23 2.84
 6 0 -15 12.06 6.58
 -6 0 15 -0.64 3.84
 6 0 -15 2.11 3.97
 -6 0 15 5.83 3.35
 6 0 -14 3.55 3.95
 -6 0 14 -1.38 3.01
 -6 0 14 -0.23 3.96
 6 0 -14 3.49 6.46
 -6 0 14 -0.2 3.31
 6 0 -14 3.22 4.73
 -6 0 14 0.17 2.87
 -6 0 13 22.36 4.15
 6 0 -13 20.35 4.1
 6 0 -13 36.22 5.59
 -6 0 13 28.91 4.5
 -6 0 13 32.22 5.65
 6 0 -13 29.43 7.76
 -6 0 13 27.09 3.45
 6 0 -13 40.41 6.01
 -6 0 13 28.27 4.88
 6 0 -12 9 3.58
 6 0 -12 15.24 4.49
 -6 0 12 12.7 2.68
 -6 0 12 13.26 3.75
 -6 0 12 12.09 4.22
 6 0 -12 7.82 6.54
 -6 0 12 10.14 3.67
 6 0 -12 22.12 5.19
 -6 0 12 6.69 3.14
 -6 0 11 117.35 8.2
 6 0 -11 87.66 9.59
 6 0 -11 117.62 9.18
 6 0 -11 101.93 7.95
 -6 0 11 108.1 8.66
 6 0 -11 131.07 11.18
 -6 0 11 120.36 9.56
 -6 0 11 106.8 8.98
 -6 0 11 99.51 8.41
 6 0 -11 112.13 8.73
 6 0 -11 114.34 9.54
 6 0 -10 258.83 18.56
 6 0 -10 277.57 18.29
 6 0 -10 264.72 17.52
 -6 0 10 273.56 18.14
 6 0 -10 293.45 19.69
 -6 0 10 307.79 18.93
 6 0 -10 299.27 18.28
 -6 0 10 278.93 18.78
 -6 0 10 319.35 17.99
 6 0 -10 273.09 18.58
 -6 0 10 300.25 18.61
 -6 0 10 280.14 18.11
 6 0 -9 110.63 9.62
 6 0 -9 126.5 9.19
 6 0 -9 123.1 8.71
 -6 0 9 121.3 9.1
 6 0 -9 125.52 10.44
 -6 0 9 113.26 9.39
 -6 0 9 117.59 9.39
 -6 0 9 135.62 8.86
 6 0 -9 120.41 9.72
 -6 0 9 134.52 9.39
 -6 0 9 124.17 8.99
 6 0 -9 140.95 9.38
 6 0 -8 1635.93 90.7
 6 0 -8 1611.19 92.17
 6 0 -8 1545.13 89.76
 6 0 -8 1537.04 89.38
 -6 0 8 1743.21 89.8
 -6 0 8 1539.13 89.85
 6 0 -8 1592.67 90.65
 -6 0 8 1551.27 90.14
 -6 0 8 1426.27 90.07
 -6 0 8 1595.19 91.05
 -6 0 8 1790.57 89.45
 -6 0 8 1512.05 91.26
 6 0 -8 1387.96 89.74
 -6 0 8 1625.65 90.05
 -6 0 8 1441.5 89.65
 6 0 -8 1568.45 89.72
 6 0 -8 1689.9 91.34
 6 0 -8 1626.82 89.92
 6 0 -7 230.67 14.08
 -6 0 7 216.24 14.25
 6 0 -7 209.92 14.93
 -6 0 7 215.2 14.46
 -6 0 7 254.73 13.97
 -6 0 7 197.72 15.11
 -6 0 7 240.82 14.17
 -6 0 7 228.75 15.18
 6 0 -7 222.9 15.38
 -6 0 7 226.04 14.31
 -6 0 7 192.39 14.34
 6 0 -7 235.9 14.19
 6 0 -7 238.71 15.44
 6 0 -7 234.33 14.48
 6 0 -6 2.18 2.82
 6 0 -6 4.81 2.52
 6 0 -6 7.78 2.47
 6 0 -6 3.75 2.15
 -6 0 6 2.94 2
 6 0 -6 5.8 2.85
 -6 0 6 4.58 1.75
 -6 0 6 3.68 2
 -6 0 6 4.71 1.89
 6 0 -6 7.15 2.56
 -6 0 6 6.02 1.94
 6 0 -6 3.56 1.39
 6 0 -6 2.83 1.99
 6 0 -6 4.41 2.26
 6 0 -5 14.61 2.83
 -6 0 5 15.49 2.46
 -6 0 5 13.92 2.35
 -6 0 5 15.8 2.87
 6 0 -5 14.19 2.94
 6 0 -5 16.16 2.18
 6 0 -5 16.12 2.92
 6 0 -5 18.92 3.24
 -6 0 4 37.98 3.68
 6 0 -4 34.47 4.2
 6 0 -4 40.56 3.46
 -6 0 3 307.92 18.05
 -6 0 3 317.04 17.95
 6 0 -3 272.71 18.12
 6 0 -3 299.69 18.4
 6 0 -3 260.54 18.23
 6 0 -3 294.17 17.63
 -6 0 2 62.62 5.07
 6 0 -2 50.09 5.04
 -6 0 2 64.77 4.83
 6 0 -2 60.97 5.3
 6 0 -2 61.13 5.61
 -6 0 2 62.38 5.21
 6 0 -2 63.23 4.84
 -6 0 1 1059.38 60.54
 6 0 -1 1076.61 61.27
 -6 0 1 1050.99 60.51
 -6 0 1 1052.87 60.88
 6 0 0 1172.22 68.53
 6 0 0 1247.9 67.69
 6 0 0 1146.93 67.86
 -6 0 0 1179.02 67.73
 -6 0 0 1171.32 68.1
 6 0 1 1864 108.39
 -6 0 -1 1929.9 108.27
 6 0 1 1952.87 108.27
 6 0 1 1790.64 108.43
 6 0 1 1934.76 108.71
 6 0 1 1941.98 107.94
 -6 0 -1 1968.47 108.98
 -6 0 -1 1891.1 108.53
 6 0 1 1972.36 109.53
 6 0 2 1768.4 100.96
 6 0 2 1672.98 100.83
 -6 0 -2 1701.73 101.46
 6 0 2 1785.08 101.09
 -6 0 -2 1907.1 101.13
 -6 0 -2 1812.28 101.39
 -6 0 -2 1857.55 100.58
 6 0 2 1682.75 100.29
 6 0 2 1911.52 102.1
 6 0 2 1747.07 100.25
 6 0 3 134.13 9.84
 -6 0 -3 139.81 10.25
 6 0 3 120.91 9.5
 6 0 3 135.44 9.84
 -6 0 -3 147.11 9.9
 -6 0 -3 140.29 9.71
 -6 0 -3 136.72 9.66
 -6 0 -3 132.71 10.27
 -6 0 -3 140.47 9.22
 -6 0 -3 140.52 10.17
 6 0 3 140.38 8.76
 6 0 3 134.77 10.54
 -6 0 -4 26.63 3.71
 6 0 4 30.82 3.09
 -6 0 -4 23.94 3.7
 6 0 4 27.02 4.09
 6 0 4 23.24 3.37
 6 0 4 22.06 3.17
 6 0 4 25.89 3.22
 6 0 4 27.05 3.14
 -6 0 -4 25.15 3.42
 6 0 4 25.77 3.38
 -6 0 -4 25.04 4.15
 -6 0 -4 23.64 3.7
 -6 0 -4 24.25 3.58
 -6 0 -4 29.27 3.91
 6 0 4 27.33 4.16
 -6 0 -5 435.52 25.64
 -6 0 -5 394.36 25.56
 6 0 5 422.28 25.22
 6 0 5 415.91 25.99
 6 0 5 431.47 25
 6 0 5 402.04 24.85
 -6 0 -5 434.78 25.54
 -6 0 -5 391.12 25.55
 6 0 5 420.9 25.16
 6 0 5 432.95 25.51
 -6 0 -6 105.11 8.9
 -6 0 -6 112.83 9.29
 6 0 6 106.71 9.08
 6 0 6 97.36 7.95
 6 0 6 100.16 7.7
 6 0 6 107.69 7.97
 -6 0 -6 102.32 8.51
 6 0 6 112.46 8.46
 -6 0 -7 190.56 14.92
 -6 0 -7 227.3 15.56
 6 0 7 202.85 14.03
 6 0 7 216.21 14.63
 -6 0 -7 243.29 15.03
 6 0 7 207.95 14.17
 6 0 7 228.02 13.95
 -6 0 -7 209.57 15.58
 6 0 7 202.27 13.82
 -6 0 -7 193.77 14.06
 -6 0 -8 276.26 18.81
 6 0 8 283.4 17.45
 -6 0 -8 264.23 18.28
 6 0 8 262.69 17.44
 -6 0 -8 277.74 19.67
 6 0 8 312.73 18.77
 6 0 8 286.5 18.43
 -6 0 -8 222.35 18.48
 6 0 9 48.01 5.85
 -6 0 -9 45.18 6.11
 6 0 9 39.73 4.41
 6 0 9 35.77 4.64
 6 0 9 38.35 4.74
 -6 0 -9 39.52 5.75
 -6 0 -10 76.21 7.62
 -6 0 -10 80.18 7.61
 6 0 10 79.1 6.62
 6 0 10 77.77 7.55
 -6 0 -10 82.6 9.04
 -6 0 -11 114.63 9.1
 -6 0 -11 134.78 9.68
 6 0 11 110.76 8.64
 6 0 11 121.17 9.44
 -6 0 -11 129.07 10.61
 -6 0 -12 2.61 3.73
 6 0 12 2.98 2.31
 6 0 13 268.55 17.71
 6 0 13 275.28 18.31
 -6 1 18 4.46 1.5
 6 1 -18 2.53 1.97
 -6 1 18 5.62 2.06
 -6 1 17 28.96 3.19
 -6 1 17 29.88 3.88
 6 1 -17 28.24 3.79
 6 1 -17 26.4 4.63
 -6 1 16 38.4 4.45
 -6 1 16 40.86 5.13
 6 1 -16 38.38 5.29
 6 1 -16 43.31 6.31
 6 1 -15 3.62 3.02
 -6 1 15 2.1 3.02
 -6 1 15 3.28 3.57
 6 1 -15 6.9 5.41
 -6 1 15 2.89 1.93
 6 1 -15 6.58 4.59
 -6 1 15 1.74 2.35
 -6 1 15 3.64 2.89
 6 1 -14 141.27 10.74
 -6 1 14 141.61 11.2
 6 1 -14 140.35 13.06
 -6 1 14 145.14 12.05
 -6 1 14 147.99 11.82
 -6 1 14 161.45 10.61
 6 1 -14 162.53 12.26
 -6 1 14 133.15 10.68
 -6 1 14 145.07 11.09
 6 1 -14 157.08 11.11
 -6 1 13 66.4 7.46
 6 1 -13 52.65 8.44
 6 1 -13 56.74 6.18
 6 1 -13 60.09 5.76
 -6 1 13 69.99 6.76
 -6 1 13 63.09 6.79
 6 1 -13 63.76 8.82
 6 1 -13 67.14 8.53
 -6 1 13 55.43 6
 -6 1 13 69.24 6.66
 6 1 -13 78.17 7.19
 -6 1 13 70.07 6.05
 6 1 -12 161.45 13.26
 6 1 -12 154.63 11.62
 6 1 -12 175.29 11.52
 -6 1 12 159.58 11.99
 6 1 -12 173.82 14.01
 -6 1 12 150.99 12.07
 -6 1 12 154.29 12.57
 6 1 -12 165.88 13.32
 -6 1 12 151.22 11.6
 -6 1 12 166.67 11.97
 6 1 -12 200.02 12.85
 6 1 -11 43.55 7.66
 -6 1 11 41.15 5.02
 -6 1 11 47.78 5.46
 6 1 -11 34.17 6.93
 -6 1 11 40.36 5.38
 6 1 -11 43.74 7.23
 -6 1 11 42.86 4.74
 6 1 -10 129.29 11.18
 -6 1 10 132.71 9.74
 6 1 -10 131.27 11.1
 -6 1 10 131.96 9.93
 -6 1 10 138.82 9.58
 -6 1 10 119.09 9.94
 6 1 -9 412.12 25.57
 -6 1 9 381.52 24.76
 -6 1 9 383.74 24.97
 6 1 -9 421.75 25.21
 -6 1 9 429.66 24.74
 6 1 -8 218.06 13.94
 6 1 -8 199.19 13.98
 -6 1 8 191.06 13.21
 -6 1 8 216.73 14.21
 6 1 -8 221.27 13.88
 -6 1 8 188.99 13.39
 -6 1 8 204.52 13.21
 6 1 -7 38.62 4.4
 6 1 -7 46.21 5.09
 -6 1 7 45.12 4.15
 6 1 -7 33.3 4.63
 -6 1 7 38.73 3.9
 -6 1 7 37.18 4
 -6 1 7 40.69 4.41
 6 1 -7 41.9 4.86
 6 1 -7 34.26 4.5
 -6 1 7 38.83 3.79
 6 1 -7 44.21 4.92
 6 1 -7 36.77 4.98
 6 1 -6 139.78 9.74
 -6 1 6 145.15 9.45
 6 1 -6 129.95 10.37
 -6 1 6 149.68 10.24
 -6 1 6 124.12 9.32
 6 1 -6 129.44 10.76
 6 1 -6 154.67 9.77
 -6 1 6 137.76 9.28
 6 1 -6 150.42 9.91
 6 1 -6 163.48 10.8
 6 1 -6 143.3 10.22
 6 1 -5 317.55 19.4
 -6 1 5 304.34 19.18
 -6 1 5 343.23 20.18
 -6 1 5 341.08 19.45
 6 1 -5 291.7 20.31
 6 1 -5 295.6 20.77
 6 1 -5 331.13 20.36
 6 1 -5 339.99 19.82
 -6 1 4 877.96 49.75
 -6 1 4 863.99 49.84
 -6 1 4 867.64 50.49
 6 1 -4 771.22 51.17
 6 1 -4 910.22 50.28
 6 1 -4 885.25 50.68
 -6 1 3 13.84 2.27
 -6 1 3 15.18 2.15
 6 1 -3 10.35 3.23
 6 1 -3 13.95 2.4
 6 1 -3 15.35 2.8
 -6 1 3 17.67 2.89
 -6 1 2 206.3 13.06
 6 1 -2 203.56 13.31
 6 1 -2 198.74 13.35
 6 1 -2 182.7 13.06
 6 1 -2 218.46 13.01
 -6 1 2 201 12.38
 -6 1 2 197.1 13.29
 -6 1 1 575.63 33.48
 6 1 -1 576.91 33.9
 -6 1 1 546.08 32.88
 6 1 -1 579.73 33.72
 6 1 0 1053.71 60.74
 6 1 0 1020.7 60.34
 -6 1 0 1133.61 59.92
 6 1 0 974.96 60.21
 -6 1 0 1037.47 60.3
 -6 1 0 1027.86 59.74
 6 1 1 159.62 11.84
 -6 1 -1 151.89 11.66
 -6 1 -1 167.13 11.72
 -6 1 -1 167.61 11.63
 -6 1 -1 161.95 10.99
 6 1 1 172.15 11.57
 -6 1 -1 164.79 11.05
 -6 1 -1 187.71 11.02
 6 1 2 377.66 23.11
 6 1 2 409.6 22.86
 6 1 2 327.98 22.23
 6 1 2 395.15 23.48
 -6 1 -2 390.74 23.78
 -6 1 -2 407.1 22.8
 -6 1 -2 356.76 23.66
 -6 1 -2 355.32 22.88
 -6 1 -2 376.02 22.84
 6 1 2 378.72 23.24
 6 1 2 381.87 22.23
 -6 1 -3 571.18 35.26
 6 1 3 611.72 34.27
 6 1 3 598.89 33.83
 6 1 3 526.94 33.76
 -6 1 -3 544.45 35.14
 6 1 3 597.95 35.01
 -6 1 -3 603.96 34.14
 -6 1 -3 576.11 35.41
 -6 1 -3 536.54 34.39
 6 1 3 565.63 34.65
 6 1 3 599.11 33.55
 6 1 4 80.03 6.94
 -6 1 -4 86.31 7.17
 6 1 4 86.86 6.62
 -6 1 -4 80.47 6.9
 -6 1 -5 25.34 4.33
 6 1 5 33.64 4.08
 6 1 5 29.87 4.56
 -6 1 -5 30.75 4.81
 6 1 5 29.49 3.99
 -6 1 -5 29.22 4.32
 -6 1 -6 48.45 6.34
 6 1 6 50.95 5.73
 6 1 6 46.88 5.13
 6 1 6 49.57 5.15
 -6 1 -6 49.03 6.4
 6 1 6 50.39 5.49
 -6 1 -6 46.39 5.74
 -6 1 -7 227.17 15.03
 -6 1 -7 175.23 13.93
 -6 1 -7 232.04 14.95
 6 1 7 186.52 13.48
 -6 1 -7 193.55 14.72
 6 1 7 209.8 13.52
 6 1 7 191.22 13.79
 6 1 7 188.28 14.07
 -6 1 -7 193.55 14.24
 -6 1 -8 156.52 13.08
 -6 1 -8 155.86 12.01
 -6 1 -8 132.23 12.35
 6 1 8 163.36 11.44
 6 1 8 157.25 11.55
 -6 1 -8 150.57 12.34
 -6 1 -8 157.58 13.03
 6 1 8 167.97 11.99
 -6 1 -8 181.42 12.59
 -6 1 -9 78.79 9.34
 -6 1 -9 68.01 7.53
 -6 1 -9 81.29 9.25
 6 1 9 86.92 7.67
 6 1 9 96.21 7.18
 -6 1 -9 83.7 8.97
 -6 1 -9 105.36 9.47
 6 1 9 109.93 7.98
 6 1 9 102.51 8.12
 6 1 9 84.27 8.17
 -6 1 -9 81.79 8.6
 6 1 10 399.76 25.67
 6 1 10 416.96 25.19
 -6 1 -10 424.96 26.96
 6 1 10 465.83 25.95
 6 1 10 480.23 25.72
 6 1 10 417.59 25.82
 -6 1 -10 368.36 26.06
 -6 1 -10 330.05 26.8
 6 1 11 45.62 4.29
 -6 1 -11 53.98 6.38
 6 1 11 49.67 4.98
 6 1 11 44.16 4.68
 -6 1 -11 50.04 6.25
 -6 1 -12 4.18 3.6
 6 1 12 3.08 2.11
 -6 1 -12 3.63 3.11
 6 1 13 43.41 3.55
 -6 1 -13 36.17 3.47
 -6 2 17 48.66 4.13
 6 2 -17 40.26 4.42
 -6 2 17 45.32 3.94
 6 2 -16 31.51 4.62
 -6 2 16 28.55 3.89
 -6 2 16 28.17 3.71
 -6 2 16 29.02 3.14
 6 2 -16 37.07 4.89
 -6 2 16 32.51 3.84
 6 2 -15 -5.21 5.73
 6 2 -15 9.54 3.47
 -6 2 15 2.74 3.36
 -6 2 15 4.13 3.16
 6 2 -15 5.62 4.23
 -6 2 15 3.98 2.27
 6 2 -15 8.94 4.73
 -6 2 15 2.92 2.89
 -6 2 15 1.87 2.69
 6 2 -14 42 7.37
 6 2 -14 55.47 5.17
 6 2 -14 57.38 6.39
 -6 2 14 39.86 5.51
 -6 2 14 40.24 5.37
 6 2 -14 47.73 7.01
 -6 2 14 60.05 5.42
 -6 2 14 38.9 5.78
 6 2 -14 45.82 7.54
 6 2 -13 4.2 6.68
 -6 2 13 11.92 4.17
 -6 2 13 8.97 3.4
 6 2 -13 5.34 5.11
 -6 2 13 7.1 4.03
 -6 2 12 45.52 5.81
 -6 2 12 43.22 5.22
 6 2 -12 45.98 6.87
 -6 2 12 47.12 5.87
 -6 2 12 50.33 5.6
 6 2 -11 41.63 6.53
 -6 2 11 34.99 4.6
 -6 2 11 41.07 5.25
 6 2 -11 45.48 7.18
 -6 2 11 43.37 5
 6 2 -10 18.05 6.28
 -6 2 10 21.49 3.71
 -6 2 10 10.67 2.9
 6 2 -10 20.25 5.09
 -6 2 10 15.97 3.72
 6 2 -10 16.56 6.09
 -6 2 10 16.33 3.36
 6 2 -9 271.44 16.4
 -6 2 9 195.62 14.47
 -6 2 9 272.02 15.51
 6 2 -9 208.04 15.46
 -6 2 9 209.03 14.75
 -6 2 9 228.85 15.24
 6 2 -9 252.79 16.01
 -6 2 9 247.58 15.1
 6 2 -8 500 27.72
 -6 2 8 381.91 26.33
 -6 2 8 524.88 27.31
 6 2 -8 415.1 27.13
 -6 2 8 418.82 26.92
 6 2 -8 495.87 27.5
 -6 2 8 458.87 26.86
 6 2 -7 572.91 32.06
 -6 2 7 599.73 31.87
 -6 2 7 479.49 31.43
 6 2 -7 521.49 31.77
 -6 2 7 517.76 31.4
 6 2 -6 331.11 19.45
 -6 2 6 335.78 19.15
 -6 2 6 327.05 19.69
 6 2 -6 257.67 19.84
 6 2 -6 313.45 19.24
 -6 2 6 300.93 18.82
 6 2 -6 307.73 20.21
 6 2 -5 368.04 20.7
 -6 2 5 361.53 20.45
 -6 2 5 347.92 21.52
 -6 2 5 349.27 21.12
 6 2 -5 330.35 21.23
 6 2 -5 344.95 20.49
 -6 2 5 313.39 20.13
 6 2 -5 336.47 21.48
 6 2 -5 286.47 22.28
 -6 2 4 789.36 45.19
 -6 2 4 817.5 46.64
 -6 2 4 778.47 45.4
 6 2 -4 818.86 46.51
 -6 2 4 797.63 46.22
 6 2 -4 692.35 47.68
 -6 2 4 824.7 46.47
 -6 2 3 1705.3 98.72
 -6 2 3 1742.44 99.85
 -6 2 3 1850.27 98.97
 6 2 -3 1696.92 99.57
 -6 2 3 1726.83 99.77
 -6 2 2 17.63 2.65
 -6 2 2 14.4 1.8
 6 2 -2 16.87 3.01
 6 2 -2 19.47 2.8
 6 2 -2 18.45 2.68
 -6 2 2 19.39 3.05
 6 2 -1 8.39 2.17
 -6 2 1 4.85 1.75
 6 2 -1 6.28 1.99
 6 2 -1 5.99 2.26
 -6 2 1 6.63 1.79
 6 2 -1 7.82 2.11
 -6 2 1 5.02 1.35
 -6 2 1 8.26 2.51
 -6 2 0 786.02 44.76
 6 2 0 813.77 45.48
 6 2 0 792.27 44.87
 6 2 0 817.61 45.24
 -6 2 0 745.42 43.8
 -6 2 0 741.63 45
 6 2 0 794.46 44.83
 -6 2 0 745.86 44.04
 -6 2 0 714.52 44.04
 -6 2 0 739.43 45.36
 6 2 1 419.01 25.32
 6 2 1 428.48 25.12
 6 2 1 465.11 23.82
 6 2 1 406.1 23.6
 -6 2 -1 390.93 24.76
 -6 2 -1 392.38 25.05
 -6 2 -1 380.81 25.33
 -6 2 -1 336.52 23.92
 -6 2 -1 356.86 23.73
 -6 2 -1 437.77 24.35
 -6 2 -2 215.38 12.94
 -6 2 -2 197.56 13.69
 -6 2 -2 166.88 12.75
 -6 2 -2 203.34 12.9
 6 2 3 175.27 11.74
 -6 2 -3 168.65 11.61
 -6 2 -3 145.08 11.36
 6 2 4 174.95 12.01
 6 2 4 173.6 11.56
 -6 2 -4 156.83 11.73
 -6 2 -4 193.21 12.36
 6 2 5 323.19 20.66
 6 2 5 336.69 20.24
 6 2 5 350.42 20.53
 -6 2 -5 285.33 20.35
 -6 2 -5 344.93 21.08
 6 2 6 41.32 5.1
 6 2 6 47.1 5.21
 -6 2 -6 44.89 5.88
 6 2 6 51.63 5.3
 6 2 6 37.37 4.58
 6 2 6 44.05 4.99
 -6 2 -7 27.47 6.26
 -6 2 -7 18.91 4.05
 6 2 7 20.5 4.06
 6 2 7 24.86 4.01
 6 2 7 26.6 4.15
 -6 2 -7 21.68 5.22
 6 2 7 30.38 4.44
 -6 2 -8 147.54 11.99
 -6 2 -8 164.96 12.61
 6 2 8 128.99 10.03
 -6 2 -8 118.38 10.9
 6 2 8 131.56 10.21
 6 2 8 128.15 10.23
 -6 2 -9 212.17 16.95
 6 2 9 236.54 15.21
 -6 2 -9 204.35 16.87
 6 2 9 225.7 15.63
 -6 2 -9 279.94 17.7
 6 2 9 244.9 15.63
 -6 2 -9 193.33 16.02
 -6 2 -9 266.91 17.05
 -6 2 -10 12.88 6.32
 6 2 10 26.6 3.56
 -6 2 -10 24.34 6.48
 6 2 10 22.69 3.83
 -6 2 -10 19.48 4.96
 -6 2 -10 18.45 5.83
 -6 2 -10 18.09 5.94
 6 2 11 101.46 7.06
 6 2 11 91.92 6.73
 -6 2 -11 88.92 8.58
 6 2 11 88.6 7.14
 -6 2 -11 70.39 7.04
 -6 2 -11 83.27 8.15
 6 2 12 31.29 3.13
 6 2 12 32.77 3.65
 6 2 12 30.78 3.14
 -6 2 -12 37.8 4.93
 6 2 13 22.78 2.44
 6 3 -16 19.11 2.73
 -6 3 16 21.11 2.95
 -6 3 16 22.31 2.4
 -6 3 16 20.03 2.72
 6 3 -15 88.88 8.71
 6 3 -15 107.24 7.32
 -6 3 15 105.28 8.08
 -6 3 15 126.9 8
 -6 3 15 94.26 7.99
 -6 3 15 100.01 7.79
 6 3 -15 121.83 8.41
 6 3 -14 175.03 10.56
 6 3 -14 128.5 10.54
 -6 3 14 174.62 10.85
 6 3 -14 148.76 11.58
 -6 3 14 122.43 10.57
 -6 3 14 127.86 10.31
 6 3 -14 164.44 11.37
 -6 3 13 11.93 3.33
 6 3 -13 7.69 4.08
 -6 3 13 10.8 3.48
 6 3 -13 19.79 6.11
 6 3 -12 32.45 7.2
 -6 3 12 27.61 4.27
 -6 3 12 30.77 4.77
 -6 3 12 19.45 4.09
 6 3 -12 26.31 6.66
 6 3 -12 21.96 4.6
 6 3 -11 63.88 8.25
 -6 3 11 59.74 6.24
 6 3 -11 51.96 6.16
 -6 3 11 55.28 6.01
 6 3 -11 62.98 7.81
 -6 3 11 52.24 5.6
 6 3 -10 238.85 16.43
 -6 3 10 234.06 15.41
 -6 3 10 199.49 14.97
 6 3 -10 242.05 16.23
 -6 3 10 224.68 14.97
 6 3 -9 64.52 7.54
 -6 3 9 58.68 5.93
 -6 3 9 55.19 5.46
 6 3 -9 60.19 7.19
 -6 3 9 53.33 5.36
 -6 3 8 103.65 7.63
 -6 3 8 78.3 6.94
 6 3 -8 94.9 8.29
 -6 3 8 90.87 7.05
 -6 3 7 170.11 10.67
 6 3 -7 144.93 10.97
 -6 3 7 140.76 10.12
 -6 3 6 319.79 18.47
 6 3 -6 298.25 18.54
 -6 3 6 275.19 17.96
 -6 3 5 291.77 17.5
 6 3 -5 274.09 17.44
 -6 3 3 28.66 3.06
 6 3 -3 18.25 3.76
 6 3 -2 92.49 8.2
 -6 3 2 108.97 7.47
 6 3 -1 527.7 32.1
 -6 3 1 516.45 30.63
 -6 3 -1 66.19 5.77
 -6 3 -2 13.69 2.94
 -6 3 -2 15.72 3.14
 -6 3 -3 370.45 22.23
 6 3 3 406.84 22.48
 6 3 4 58.83 5.44
 -6 3 -4 58.91 6.06
 6 3 4 53.88 5.01
 -6 3 -4 50.03 5.27
 6 3 5 10.06 2.97
 6 3 5 10.39 3.03
 -6 3 -5 9.88 3
 -6 3 -5 11.41 3.96
 6 3 5 10.72 2.83
 6 3 5 10.86 3.15
 6 3 6 63.82 5.75
 -6 3 -6 52.15 6.16
 -6 3 -6 58.49 6.32
 6 3 6 55.64 5.65
 6 3 6 48.79 4.93
 6 3 6 66.4 6.08
 6 3 7 97.8 7.81
 -6 3 -7 89.32 8.5
 6 3 7 103.98 7.98
 6 3 7 97 8.15
 -6 3 -7 100.39 8.99
 6 3 8 0.89 3.03
 6 3 8 -0.13 2.45
 -6 3 -8 -0.52 3.79
 -6 3 -8 2.26 4.31
 6 3 8 1.43 2.39
 6 3 8 -0.44 2.8
 -6 3 -9 91.32 9.86
 6 3 9 94.1 7.42
 6 3 9 88.85 7.08
 6 3 9 84.46 6.84
 -6 3 -9 109.66 9.2
 6 3 10 115.5 7.72
 -6 3 -10 74.86 9.14
 -6 3 -10 98.89 9.43
 6 3 10 99.21 7.75
 6 3 10 95.48 7.48
 -6 3 -10 94.43 8.9
 -6 3 -11 9.07 4.11
 6 3 11 15.15 2.48
 -6 3 -11 22.54 4.8
 6 3 11 12.32 2.66
 6 3 11 13.72 2.6
 -6 3 -11 13.19 4.19
 6 3 12 30.69 2.71
 -6 3 -12 25.95 3.78
 6 3 12 31.46 3.1
 -6 4 15 31.41 3.18
 -6 4 15 32.17 3.03
 6 4 -15 34.26 3.47
 6 4 -15 26.73 3.28
 6 4 -14 115.08 9.43
 6 4 -14 138.08 8.89
 -6 4 14 131.97 9.06
 -6 4 14 146.01 9.11
 6 4 -14 118.27 9.21
 -6 4 14 115.06 8.6
 6 4 -14 139.79 9.51
 -6 4 13 17.6 2.87
 6 4 -13 26.6 5.36
 -6 4 13 22.92 3.7
 6 4 -13 25.84 4.86
 -6 4 13 22.4 3.2
 6 4 -12 1.06 5.39
 -6 4 12 4.35 3.01
 -6 4 12 3.23 2.2
 6 4 -12 6.47 4.54
 -6 4 12 3.56 2.39
 6 4 -11 87.44 8.63
 -6 4 11 89.88 7.36
 6 4 -11 80.93 8.04
 -6 4 11 77.84 6.72
 6 4 -10 14.79 5.56
 -6 4 10 12.27 3.45
 6 4 -10 14.1 4.76
 -6 4 10 7.44 2.63
 6 4 -9 248.62 16.47
 -6 4 9 261.7 16
 6 4 -9 230.44 16.02
 -6 4 9 216.88 15.08
 6 4 -8 6.07 4.41
 -6 4 8 2.92 2.32
 6 4 -8 3.61 4.08
 -6 4 8 1.56 1.83
 6 4 -7 183.13 12.65
 -6 4 7 174.75 11.9
 6 4 -7 166.77 12.06
 6 4 -6 358.32 21.81
 -6 4 6 340.72 21.36
 -6 4 4 239.05 15.25
 -6 4 -1 194.79 13.01
 -6 4 -2 32.15 4.07
 -6 4 -3 20.8 3.31
 -6 4 -3 23.28 4.07
 6 4 3 26.32 3.31
 -6 4 -4 93.26 7.86
 6 4 4 88.64 7.01
 6 4 5 241.22 14.68
 -6 4 -5 208.04 15.04
 6 4 5 224.92 14.52
 6 4 6 30.2 3.55
 -6 4 -6 30.96 4.96
 -6 4 -6 21.15 4.11
 6 4 6 28.93 3.86
 -6 4 -7 -1.69 4.81
 6 4 7 3.85 2.05
 6 4 7 2.35 2.38
 -6 4 -7 3.73 3.09
 -6 4 -7 2.15 3.54
 6 4 7 2.53 2.74
 -6 4 -8 42.64 6
 -6 4 -8 49.58 7.57
 6 4 8 40.39 4.21
 6 4 8 32.41 3.82
 -6 4 -8 33.56 4.87
 -6 4 -9 45.98 6.09
 -6 4 -9 47.87 7.19
 6 4 9 58.17 5.09
 -6 4 -9 44.08 6.51
 6 4 9 49.97 4.6
 -6 4 -9 58.37 6.4
 -6 4 -10 14.23 3.78
 6 4 10 16.18 2.45
 -6 4 -10 15.14 4.5
 6 4 10 14.52 2.5
 -6 4 -10 9.24 3.85
 -6 4 -10 13.83 3.97
 6 4 11 53.19 3.98
 6 4 11 52.13 4.11
 6 4 11 55.88 4.15
 -6 4 -11 56.65 4.57
 6 5 -13 4.08 2.32
 6 5 -13 12.15 2.61
 6 5 -13 18.58 2.64
 -6 5 13 10.22 1.76
 -6 5 13 13.97 2.02
 -6 5 13 10.61 1.84
 6 5 -12 43.14 4.81
 -6 5 12 59.24 4.53
 -6 5 12 48.46 4.24
 6 5 -12 40.37 4.33
 6 5 -12 65.94 5.37
 6 5 -11 21.2 4.01
 -6 5 11 20.33 2.88
 -6 5 11 24.88 3.16
 6 5 -11 20.91 3.47
 6 5 -10 72.58 6.44
 -6 5 10 65.79 5.5
 -6 5 10 73.67 5.83
 6 5 -10 58.97 5.77
 6 5 -9 50.2 5.62
 -6 5 9 43.67 4.36
 6 5 -8 27.55 4.49
 -6 5 8 24.09 3.16
 -6 5 7 30.36 3.7
 -6 5 6 133.65 9.37
 -6 5 1 171.93 11.78
 -6 5 -1 32.49 3.79
 -6 5 -2 21.68 3.76
 -6 5 -3 105.22 8.15
 -6 5 -4 9.65 2.87
 -6 5 -4 9.63 3.21
 6 5 5 19.52 2.78
 -6 5 -5 21.21 3.68
 -6 5 -6 14.93 4.15
 6 5 6 14.6 2.51
 -6 5 -6 18.47 3.27
 -6 5 -7 79.23 6.52
 6 5 7 69.69 5.17
 -6 5 -7 63.51 5.54
 -6 5 -8 16.96 3.3
 -6 5 -8 21.39 3.95
 -6 5 -8 16.92 4.5
 6 5 8 19.3 2.44
 6 5 8 17.38 1.96
 -6 5 -8 18.12 3.47
 6 5 9 30.5 2.55
 -6 5 -9 23.98 3.61
 -6 5 -9 18.32 2.85
 -6 5 -9 26.87 3.22
 6 6 -10 59.08 4.31
 -6 6 10 48.96 3.94
 6 6 -9 22.28 2.56
 -6 6 6 179.02 11.46
 -6 6 5 36.88 3.49
 -6 6 -2 50.95 4.38
 -6 6 -3 5.32 1.85
 -6 6 -4 -1.42 2.28
 -6 6 -5 33.24 3.25
 -6 6 -6 81.86 5.92
 -6 6 -6 63.9 5.08
 -7 -6 10 11.9 1.83
 -7 -6 9 122.82 7.54
 7 -6 -9 99.85 7.18
 -7 -6 8 63.74 5.25
 7 -6 -8 63.17 5.22
 -7 -6 7 29.2 3.55
 -7 -6 7 27.78 3.39
 7 -6 -7 26.01 3.58
 -7 -6 6 184.42 12.34
 7 -6 -6 185.2 12.46
 -7 -6 6 195.64 12.41
 -7 -6 5 8.64 2.68
 -7 -6 5 10.93 2.67
 7 -6 -5 14.56 3.27
 -7 -6 4 9.1 2.54
 -7 -6 4 7.1 2.69
 7 -6 -4 6.79 3.01
 -7 -6 3 12.27 2.48
 -7 -6 3 15.31 3.39
 7 -6 -3 16.18 3.43
 -7 -6 2 2.22 1.68
 -7 -6 2 1.07 2.86
 7 -6 -2 -1.61 2.83
 -7 -6 1 11.05 3.49
 7 -6 -1 11.1 3.14
 -7 -6 0 1.2 3.07
 7 -6 0 -0.93 2.8
 7 -6 1 24.57 3.66
 -7 -6 -1 23.11 4.09
 7 -6 1 26.75 3.44
 7 -6 2 129.34 8.91
 -7 -6 -2 135.34 9.73
 7 -6 2 134.27 8.93
 7 -6 3 67.54 5.35
 -7 -6 -3 72.08 6.06
 7 -6 3 76.95 5.44
 7 -6 4 2.47 2.03
 7 -6 5 24.15 2.27
 -7 -6 -5 28.92 2.8
 7 -5 -13 80.45 5.91
 7 -5 -12 51.63 5.11
 -7 -5 12 56.11 4.48
 -7 -5 12 59.02 4.28
 7 -5 -12 53.72 4.83
 -7 -5 11 36.66 3.76
 -7 -5 11 38.8 4.1
 7 -5 -11 37.04 4.84
 7 -5 -11 40.78 4.52
 -7 -5 10 45.99 5.09
 7 -5 -10 40.88 5.69
 -7 -5 10 48.48 4.68
 7 -5 -10 45.43 5.27
 7 -5 -9 53.55 6.54
 -7 -5 9 51.49 6.05
 -7 -5 9 55.32 5.86
 -7 -5 9 52.25 5.4
 7 -5 -9 58.55 6.15
 7 -5 -8 40.48 6.17
 -7 -5 8 33.56 5.65
 -7 -5 8 39.89 4.99
 7 -5 -8 51.01 6.01
 -7 -5 7 35.89 5.99
 7 -5 -7 32.44 6.13
 7 -5 -7 35.74 5.53
 7 -5 -6 42.26 6.72
 -7 -5 6 43.76 5.67
 -7 -5 6 35.36 5.08
 7 -5 -6 49.95 6.18
 7 -5 -5 7.87 4.99
 -7 -5 5 3.63 3.64
 -7 -5 5 4.93 3.38
 -7 -5 5 6.13 3.56
 7 -5 -5 4.42 4.26
 7 -5 -4 101.87 9.58
 -7 -5 4 95.89 8.38
 -7 -5 4 88.85 8.83
 -7 -5 4 101 8.48
 7 -5 -4 105.1 8.96
 -7 -5 3 104.93 8.64
 -7 -5 3 82.24 9.03
 7 -5 -3 127.83 10.07
 -7 -5 3 114.97 8.78
 7 -5 -3 102.31 9.26
 7 -5 -3 109.14 10.07
 -7 -5 2 109.04 8.69
 7 -5 -2 125.56 10.33
 -7 -5 2 88.85 9.42
 -7 -5 2 124.94 8.9
 7 -5 -2 106.74 9.4
 7 -5 -2 93.95 9.9
 -7 -5 1 2.97 3.44
 7 -5 -1 4.78 5.1
 -7 -5 1 4.66 2.61
 -7 -5 1 5.92 4.44
 7 -5 -1 3.6 4.9
 7 -5 -1 3.75 3.9
 -7 -5 0 199.36 14.21
 7 -5 0 175.22 13.67
 -7 -5 0 210.24 12.6
 -7 -5 0 166.49 13.63
 7 -5 0 157.49 12.91
 7 -5 1 169.4 13.68
 7 -5 1 209.17 14.47
 -7 -5 -1 187.64 14.32
 7 -5 1 185.09 13.6
 -7 -5 -2 100.04 9.05
 7 -5 2 72.24 7.14
 7 -5 2 87.51 7.71
 7 -5 2 79.24 8.07
 -7 -5 -3 141.9 10.01
 7 -5 3 130.47 9.65
 7 -5 3 139.27 9.94
 -7 -5 -4 37.65 5.01
 7 -5 4 44.29 4.77
 7 -5 4 35.67 6.08
 -7 -5 -4 36.17 5.44
 7 -5 4 48.49 5.21
 -7 -5 -5 90.09 7.63
 7 -5 5 88.43 6.72
 7 -5 5 78.87 8.23
 -7 -5 -5 83.57 7.67
 7 -5 5 103.57 7.37
 7 -5 6 41.76 3.89
 -7 -5 -6 42.22 4.67
 7 -5 7 13.9 2.1
 7 -5 7 14.44 3.21
 -7 -5 -7 19.86 2.82
 7 -5 8 59.29 4.89
 7 -4 -15 6.7 1.92
 -7 -4 15 5.37 1.91
 7 -4 -15 5.88 1.89
 -7 -4 14 6.81 2.69
 7 -4 -14 8.2 2.42
 7 -4 -14 3.08 2.62
 7 -4 -14 6.65 2.64
 7 -4 -13 24.7 4.32
 -7 -4 13 34.8 4.59
 -7 -4 13 26.85 3.08
 7 -4 -13 32.44 4.65
 -7 -4 13 22.66 3.72
 7 -4 -13 29.57 4.43
 -7 -4 12 25.01 4.7
 7 -4 -12 27.27 5.03
 7 -4 -12 23.52 4.79
 -7 -4 12 22.87 4.47
 -7 -4 12 25.63 3.66
 -7 -4 12 26.33 3.27
 7 -4 -12 26.88 4.85
 7 -4 -11 20.37 5.22
 7 -4 -11 25.04 5.27
 -7 -4 11 23.41 5.01
 -7 -4 11 30.73 5.12
 -7 -4 11 23.06 4.02
 -7 -4 11 23.51 3.58
 7 -4 -11 26.74 5.14
 7 -4 -10 259.81 17.26
 7 -4 -10 261.1 18.8
 7 -4 -10 268.37 18.46
 -7 -4 10 271.96 17.9
 -7 -4 10 267.23 18.59
 -7 -4 10 285.28 19.58
 -7 -4 10 255.29 17.18
 7 -4 -10 273.11 18.4
 7 -4 -9 54.51 7.54
 7 -4 -9 44.14 6.54
 -7 -4 9 53.72 6.33
 7 -4 -9 47.43 5.81
 -7 -4 9 46.07 7.2
 -7 -4 9 47.53 6.46
 -7 -4 9 48.27 5.46
 7 -4 -9 53.49 6.87
 -7 -4 8 63.61 6.79
 -7 -4 8 43.32 5.84
 7 -4 -8 58.85 7.77
 7 -4 -8 58.84 7.2
 7 -4 -8 47.19 6.13
 -7 -4 8 58.03 8.04
 -7 -4 8 62.22 6.98
 7 -4 -8 63.85 6.53
 -7 -4 8 51.45 5.94
 7 -4 -8 57.06 7.12
 -7 -4 7 40 5.78
 7 -4 -7 43.27 6.92
 7 -4 -7 41.98 5.83
 -7 -4 7 34.43 6.57
 7 -4 -7 37.92 6.43
 -7 -4 7 44.45 6.12
 -7 -4 7 41.41 6.03
 7 -4 -7 37.41 5.05
 -7 -4 7 38.27 5.26
 7 -4 -7 34.94 6.13
 7 -4 -6 187.79 14.45
 -7 -4 6 184.87 13.81
 7 -4 -6 185.62 13.36
 7 -4 -6 165.33 13.53
 -7 -4 6 192.06 14.8
 7 -4 -6 183.36 12.72
 -7 -4 6 172.19 12.91
 7 -4 -6 183.27 13.73
 -7 -4 5 95.6 9.45
 7 -4 -5 106.81 9.19
 7 -4 -5 116.92 9.55
 7 -4 -5 101.93 9.85
 -7 -4 5 108.93 10.24
 7 -4 -5 103.01 9.34
 -7 -4 5 106.47 9.24
 -7 -4 4 16.3 4.52
 7 -4 -4 17.58 4.97
 7 -4 -4 14.32 4.62
 -7 -4 4 17.33 5.23
 -7 -4 4 18.92 4.46
 -7 -4 4 18.52 4.06
 7 -4 -4 21.21 5.12
 7 -4 -4 19.03 4.93
 -7 -4 3 127.56 9.96
 -7 -4 3 124.76 10.03
 -7 -4 3 122.38 10.81
 -7 -4 3 112.24 9.82
 7 -4 -3 124.64 10.53
 7 -4 -3 128.65 10.15
 -7 -4 3 141.3 11.77
 7 -4 -3 124.11 10.66
 -7 -4 3 128.24 9.76
 7 -4 -3 115.19 10.11
 -7 -4 2 203.27 14.75
 -7 -4 2 210.05 15.17
 -7 -4 2 190.62 13.9
 -7 -4 2 196.27 14.61
 7 -4 -2 204.02 14.71
 7 -4 -2 212.44 15.19
 -7 -4 2 220.34 14.17
 7 -4 -2 184.48 14.36
 -7 -4 1 24.53 5.12
 -7 -4 1 22.7 5.31
 -7 -4 1 22.37 4.85
 7 -4 -1 25.45 5.42
 -7 -4 1 26.77 4.13
 7 -4 -1 20.35 3.89
 -7 -4 1 25.24 3.98
 7 -4 -1 37.56 6.02
 7 -4 -1 23.82 5.18
 -7 -4 0 188.39 14.68
 7 -4 0 196.13 14.14
 7 -4 0 170.94 13.96
 -7 -4 0 203.43 13.23
 7 -4 0 193.25 14.65
 7 -4 0 190.17 13.85
 -7 -4 -1 78.63 7.24
 -7 -4 -1 82.29 8.71
 7 -4 1 77.2 7.95
 -7 -4 -1 79.4 6.56
 7 -4 1 60.24 7.75
 7 -4 1 75.35 8.65
 7 -4 1 77.53 7.8
 -7 -4 -2 254.92 17.03
 -7 -4 -2 263.09 18.12
 7 -4 2 250.85 17.05
 7 -4 2 251.78 17.92
 7 -4 2 237.02 17.59
 -7 -4 -2 231.15 17.19
 7 -4 2 223.67 16.62
 -7 -4 -3 34.34 5.74
 7 -4 3 29.21 4.87
 -7 -4 -3 33.56 6.51
 7 -4 3 38.15 6.62
 -7 -4 -3 37.66 6.09
 7 -4 3 28.3 5.71
 -7 -4 -4 204.99 13.87
 -7 -4 -4 190.2 14.27
 7 -4 4 213.36 14.63
 7 -4 4 163.76 11.83
 -7 -4 -4 176.34 12.44
 -7 -4 -4 187.68 13.55
 -7 -4 -5 37.54 6.17
 7 -4 5 34.87 6.45
 7 -4 5 34.32 4.39
 7 -4 5 31.15 4.71
 -7 -4 -5 32.42 4.78
 -7 -4 -5 33.24 5.6
 -7 -4 -6 26.24 5.19
 7 -4 6 20.05 3.94
 -7 -4 -6 25.34 5.57
 7 -4 6 23.77 3.87
 7 -4 6 27.97 5.62
 -7 -4 -6 23.7 4.4
 -7 -4 -6 24.75 4.84
 -7 -4 -7 31.97 5.33
 7 -4 7 33.85 3.63
 7 -4 7 25.47 4.04
 -7 -4 -7 29.31 4.6
 -7 -4 -7 30.16 4.41
 -7 -4 -8 80.69 7.08
 7 -4 8 72.57 5.29
 7 -4 8 58.41 5.96
 -7 -4 -8 74.22 6.37
 -7 -4 -9 151.69 9.85
 7 -4 9 120.25 8.96
 7 -4 9 126.1 9.63
 -7 -4 -9 146.53 9.31
 7 -4 10 37.1 3.09
 7 -4 10 35.75 3.53
 7 -3 -16 3.03 2.14
 7 -3 -16 6.09 2.36
 7 -3 -16 5.52 2.41
 7 -3 -15 35.47 4.43
 7 -3 -15 35.47 4.82
 -7 -3 15 27.6 4.04
 7 -3 -15 39.88 4.73
 7 -3 -14 132.62 10.23
 7 -3 -14 112.92 9.27
 -7 -3 14 107.8 9.57
 7 -3 -14 118.6 9.51
 7 -3 -13 18.32 5.43
 7 -3 -13 12.69 4.44
 -7 -3 13 15.35 4.7
 7 -3 -13 11.86 4.61
 7 -3 -12 42.17 6.89
 7 -3 -12 37.12 6.03
 7 -3 -12 41.96 4.96
 -7 -3 12 36.86 4.48
 -7 -3 12 48.9 7.07
 -7 -3 12 36.87 3.9
 7 -3 -12 43.14 6.53
 7 -3 -11 27.62 6.29
 7 -3 -11 35.99 5.07
 -7 -3 11 30.48 6.53
 -7 -3 11 30.11 4.36
 -7 -3 11 32.92 3.97
 7 -3 -11 26.39 5.33
 -7 -3 10 264.65 19.62
 7 -3 -10 306.16 21.07
 7 -3 -10 299.18 20.02
 -7 -3 10 345.69 22.05
 7 -3 -10 314.68 19.86
 -7 -3 10 302.31 19.37
 -7 -3 10 277.59 18.66
 -7 -3 9 66.17 7.34
 7 -3 -9 72.26 8.56
 -7 -3 9 63.64 6.88
 7 -3 -9 65.7 7.54
 7 -3 -9 69.41 7.45
 -7 -3 9 73.3 8.66
 7 -3 -9 88.63 7.53
 -7 -3 9 65.4 6.23
 -7 -3 8 775.28 48.6
 7 -3 -8 794.55 49.86
 -7 -3 8 760.01 49.17
 7 -3 -8 847.5 48.96
 -7 -3 8 811.23 50.18
 7 -3 -8 873.13 48.98
 7 -3 -8 933.16 48.96
 -7 -3 8 776 48.01
 7 -3 -7 373.02 24.83
 -7 -3 7 350.22 24.22
 -7 -3 7 347.44 23.65
 7 -3 -7 381.5 24
 -7 -3 7 373.62 25.13
 7 -3 -7 442.85 23.86
 7 -3 -7 400.32 24.04
 7 -3 -7 345.79 23.61
 -7 -3 7 358.11 23.19
 -7 -3 6 41.79 5.87
 7 -3 -6 53.58 6.81
 7 -3 -6 47.55 5.83
 7 -3 -6 42.54 5.55
 -7 -3 6 42.86 5.43
 -7 -3 6 42.81 6.21
 7 -3 -6 56.71 5.4
 7 -3 -6 54.19 6.01
 -7 -3 6 46.6 5.19
 7 -3 -5 105.8 9.67
 -7 -3 5 97.02 9.19
 7 -3 -5 106.3 8.88
 -7 -3 5 104.95 8.71
 -7 -3 5 114.93 8.94
 7 -3 -5 105.08 8.81
 -7 -3 5 111.16 10.03
 7 -3 -5 118.36 8.4
 7 -3 -5 106.84 9.2
 -7 -3 5 114.58 8.48
 7 -3 -4 126.6 10.3
 -7 -3 4 134.93 10.31
 7 -3 -4 124.62 10.93
 -7 -3 4 130.05 10.71
 7 -3 -4 137.87 10.23
 -7 -3 4 130.55 10.27
 7 -3 -4 138.71 9.66
 -7 -3 4 140.8 11.27
 7 -3 -4 144.64 10.75
 -7 -3 3 451.72 29.25
 -7 -3 3 447.17 28.68
 7 -3 -3 428.63 29.51
 -7 -3 3 457.71 29.45
 7 -3 -3 494.29 28.89
 -7 -3 3 455.4 29.23
 7 -3 -3 476.83 28.91
 -7 -3 3 512.68 30.29
 7 -3 -3 457.36 29.21
 7 -3 -3 494.99 28.7
 -7 -3 3 512.58 28.71
 -7 -3 2 321.78 21.67
 -7 -3 2 323.69 21.67
 7 -3 -2 355.49 21.03
 -7 -3 2 334.34 22.48
 7 -3 -2 321.51 20.95
 -7 -3 2 344.66 20.96
 7 -3 -2 320.45 20.85
 7 -3 -2 336.44 21.6
 -7 -3 2 362.51 20.89
 -7 -3 2 318.56 21.43
 7 -3 -2 310.32 20.93
 -7 -3 1 50.42 6.21
 -7 -3 1 48.56 6.29
 -7 -3 1 57.79 6.31
 7 -3 -1 54.13 5.61
 -7 -3 1 47.84 5
 7 -3 -1 55.92 5.76
 7 -3 -1 46.27 5.63
 -7 -3 1 57.65 5.32
 7 -3 -1 43 5.62
 7 -3 -1 47.69 6.1
 -7 -3 0 321.66 19.96
 -7 -3 0 301.07 20.49
 7 -3 0 296.71 19.52
 7 -3 0 304.61 19.67
 7 -3 0 322.83 20.41
 7 -3 0 293.53 20.09
 7 -3 0 289.95 19.55
 -7 -3 0 310.62 19.28
 -7 -3 0 320.43 20.55
 -7 -3 -1 166.26 12.95
 -7 -3 -1 155.61 12.4
 -7 -3 -1 168.88 13.02
 -7 -3 -1 202.2 11.73
 7 -3 1 158.74 11.94
 7 -3 1 156.61 11.93
 7 -3 1 177.46 13.11
 7 -3 1 149 11.77
 -7 -3 -2 175.37 13.04
 -7 -3 -2 164.6 13.31
 -7 -3 -2 178.31 13.47
 7 -3 2 172.38 12.39
 7 -3 2 178.58 12.54
 7 -3 2 156.1 12.08
 7 -3 2 182.38 13.47
 7 -3 2 162.89 13.11
 -7 -3 -2 164.65 12.18
 -7 -3 -2 170.83 12.79
 7 -3 2 177.22 12.38
 -7 -3 -3 535.97 31.18
 7 -3 3 462.18 29.05
 -7 -3 -3 486.88 31.29
 7 -3 3 500.05 30.15
 7 -3 3 544.84 31.45
 7 -3 3 506.96 31.05
 -7 -3 -3 421.48 29.83
 -7 -3 -3 524.88 30.59
 7 -3 3 464.61 29.89
 -7 -3 -4 322.55 21.03
 -7 -3 -4 324.11 21.3
 7 -3 4 262.72 18.63
 7 -3 4 301.67 20.05
 7 -3 4 329.3 21.09
 7 -3 4 328.03 21.01
 -7 -3 -4 294.19 20.21
 -7 -3 -4 331.96 20.39
 7 -3 4 293.46 19.59
 -7 -3 -5 929.02 53.72
 -7 -3 -5 933.14 54.11
 7 -3 5 821.6 51.33
 7 -3 5 875.49 52.88
 7 -3 5 844.72 53.49
 -7 -3 -5 965.7 53.45
 -7 -3 -5 952.69 53.02
 7 -3 5 895.33 52.37
 -7 -3 -6 30.63 6.28
 -7 -3 -6 41.37 6.72
 7 -3 6 36.45 4.28
 7 -3 6 33.8 5.39
 -7 -3 -6 38.35 6.09
 -7 -3 -6 34.91 5.1
 7 -3 6 41.82 5.66
 -7 -3 -7 338.03 23.4
 -7 -3 -7 390.3 23.99
 7 -3 7 352.58 21.11
 7 -3 7 312.11 22.55
 7 -3 7 325.33 23.2
 -7 -3 -7 364.84 23.16
 -7 -3 -7 337.13 22.14
 7 -3 7 403.13 22.59
 7 -3 8 57.5 6.56
 7 -3 8 60.82 7.14
 -7 -3 -8 76.31 7.33
 7 -3 9 50.61 6.13
 7 -3 9 51.32 5.71
 -7 -3 -9 60.05 6.21
 -7 -3 -10 1.85 3.11
 7 -3 10 4.54 2.58
 7 -3 10 -0.41 2.72
 -7 -3 -10 2.66 2.91
 -7 -3 -11 49.39 4.4
 7 -3 11 34.71 3.67
 7 -3 11 39.73 3.86
 -7 -3 -11 47.25 4.23
 7 -2 -17 70.26 6.06
 7 -2 -17 74.71 5.46
 -7 -2 17 65.19 5.6
 -7 -2 17 85.45 5.94
 7 -2 -17 69.67 5.91
 -7 -2 16 10.35 3.07
 7 -2 -16 5.28 2.89
 7 -2 -16 5.68 3.8
 -7 -2 16 5.87 3.21
 7 -2 -16 6.32 3.53
 7 -2 -15 23.55 5.66
 -7 -2 15 24.04 4.99
 -7 -2 15 23.83 4.61
 7 -2 -15 24.12 5.09
 7 -2 -14 24.61 6.47
 7 -2 -14 26.68 4.24
 -7 -2 14 27.59 5.67
 -7 -2 14 34.77 5.47
 -7 -2 14 33.2 5.53
 7 -2 -14 30.45 5.83
 -7 -2 13 42.5 5.21
 -7 -2 13 57.18 6.97
 7 -2 -13 45.72 7.89
 7 -2 -13 48.47 5.72
 -7 -2 13 47.21 7.46
 -7 -2 13 56.36 6.86
 7 -2 -13 53.2 6.93
 -7 -2 12 103.98 9.18
 7 -2 -12 119.39 11.32
 -7 -2 12 109.6 10.22
 -7 -2 12 115.28 11.19
 7 -2 -12 112.37 9.4
 -7 -2 12 117.52 10.13
 7 -2 -12 117.5 10.23
 7 -2 -11 15.87 5.26
 -7 -2 11 20.58 4.39
 7 -2 -11 18.99 6.16
 -7 -2 11 24.29 5.09
 7 -2 -11 23.69 4.85
 -7 -2 11 29.67 6.43
 -7 -2 11 28.46 3.6
 -7 -2 11 22.95 5.39
 7 -2 -11 25.72 5.38
 -7 -2 10 255.95 17.77
 7 -2 -10 270.58 19.06
 -7 -2 10 237.74 17.86
 7 -2 -10 281.79 17.76
 -7 -2 10 293.52 18.28
 -7 -2 10 275.88 19.25
 -7 -2 10 244.13 16.65
 -7 -2 10 237.25 16.12
 7 -2 -10 283.29 18.04
 -7 -2 9 169.23 13.03
 7 -2 -9 172.65 14.01
 -7 -2 9 170.63 12.11
 -7 -2 9 178.94 12.98
 7 -2 -9 180.23 12.63
 -7 -2 9 166.7 11.66
 7 -2 -9 187.5 13.02
 -7 -2 9 178.67 14.16
 7 -2 -9 194.08 13.27
 -7 -2 8 239.79 17.2
 7 -2 -8 264.35 18.05
 7 -2 -8 273.88 17.11
 -7 -2 8 243.76 16.35
 -7 -2 8 254.02 18.03
 -7 -2 8 265.26 17.2
 7 -2 -8 251.93 16.91
 -7 -2 8 235.81 15.92
 7 -2 -8 275.9 17.26
 -7 -2 7 57.76 6.09
 7 -2 -7 60.26 5.87
 -7 -2 7 52.84 6.64
 7 -2 -7 60.2 6.16
 -7 -2 7 53.21 5.75
 -7 -2 7 57.81 5.43
 7 -2 -7 55.6 6.13
 -7 -2 7 56.79 5.14
 7 -2 -7 59.91 6.01
 -7 -2 7 60.48 5.96
 -7 -2 6 77.06 7.36
 -7 -2 6 93.66 7.12
 -7 -2 6 86.87 7.42
 7 -2 -6 87.89 7.11
 7 -2 -6 81.82 7.3
 -7 -2 6 85.63 7.31
 7 -2 -6 86.33 7.55
 -7 -2 6 84.78 6.66
 7 -2 -6 88.96 7.36
 7 -2 -5 3.11 2.99
 -7 -2 5 0.94 2.9
 7 -2 -5 2.08 2.95
 -7 -2 5 0.47 2.7
 7 -2 -5 5.16 2.69
 -7 -2 5 2.36 1.73
 -7 -2 5 3.82 2.38
 -7 -2 5 0.65 2.17
 -7 -2 5 3.13 2.75
 7 -2 -5 3.97 3.09
 -7 -2 4 664.29 37.84
 -7 -2 4 606.42 38.47
 -7 -2 4 639.82 38.75
 -7 -2 4 634.38 38.54
 -7 -2 4 655.58 38.61
 7 -2 -4 636.95 37.91
 -7 -2 4 644.88 38.05
 -7 -2 4 720.24 38.65
 7 -2 -4 635.44 38.42
 7 -2 -4 628.75 38.1
 7 -2 -3 326.85 20.64
 -7 -2 3 309.06 20.29
 -7 -2 3 321.75 20.38
 -7 -2 3 326.73 20.25
 7 -2 -3 315.4 19.67
 -7 -2 3 351.95 21.09
 -7 -2 3 320.44 20.39
 7 -2 -3 300.58 20.06
 -7 -2 3 323.21 19.59
 7 -2 -3 315.76 19.86
 -7 -2 2 444.37 27.76
 7 -2 -2 499.55 28.8
 -7 -2 2 472.43 28.49
 -7 -2 2 465.83 28.52
 7 -2 -2 453.13 27.72
 -7 -2 2 517.63 29.33
 7 -2 -2 453.41 27.86
 7 -2 -2 463.19 28.3
 7 -2 -2 470.16 27.94
 -7 -2 2 451.82 28.16
 7 -2 -2 463.94 29.51
 -7 -2 1 821.78 51.7
 -7 -2 1 775.16 52.14
 -7 -2 1 906.08 52.32
 -7 -2 1 957.53 52.64
 -7 -2 1 922.63 52.49
 -7 -2 1 1027.51 51.79
 -7 -2 1 844.61 51.87
 7 -2 -1 878.57 51.49
 -7 -2 1 1053.84 53.38
 7 -2 -1 890.98 51.74
 7 -2 -1 845.25 51.58
 7 -2 -1 853.2 53.38
 -7 -2 0 13.6 3.75
 -7 -2 0 9.64 3.8
 7 -2 0 15.15 3.14
 -7 -2 0 12.12 3.61
 -7 -2 0 10.72 2.26
 -7 -2 0 10.12 2.08
 -7 -2 0 11.38 3.54
 7 -2 0 12.26 3
 -7 -2 0 16.89 4.04
 7 -2 0 11.78 3.22
 -7 -2 0 11.83 2.48
 7 -2 0 10.19 3.06
 7 -2 0 10.18 3.64
 -7 -2 -1 79.65 7.77
 7 -2 1 84.49 7.34
 -7 -2 -1 97.84 8.15
 7 -2 1 93.09 7.22
 7 -2 1 81.74 7.74
 -7 -2 -1 113.16 7.13
 7 -2 1 84.41 7.17
 7 -2 1 83.61 7.27
 -7 -2 -2 179.83 12.63
 -7 -2 -2 150.29 12.52
 -7 -2 -2 185.91 12.71
 7 -2 2 162.19 11.73
 7 -2 2 171.49 11.83
 7 -2 2 171.81 12.45
 7 -2 2 169.33 11.68
 -7 -2 -3 77.1 7.94
 -7 -2 -3 94.28 8.49
 -7 -2 -3 93.45 8.33
 7 -2 3 78.6 7.06
 7 -2 3 67.06 6.08
 7 -2 3 80.6 7.04
 7 -2 3 87.27 6.38
 7 -2 3 90.02 7.86
 -7 -2 -3 85.91 7.16
 7 -2 3 73.37 6.91
 -7 -2 -4 108.31 9.51
 -7 -2 -4 106.05 9.49
 7 -2 4 90.91 7.02
 -7 -2 -4 103.98 9.32
 7 -2 4 98.49 8.23
 7 -2 4 97.5 8.25
 7 -2 4 91.54 7.4
 7 -2 4 97.69 8.82
 -7 -2 -4 103.62 9.25
 -7 -2 -4 96.88 8.01
 7 -2 4 99.03 8.02
 -7 -2 -5 186.08 14.3
 -7 -2 -5 198.47 14.44
 7 -2 5 188.19 12.95
 7 -2 5 171.78 13.14
 7 -2 5 184.67 13.54
 -7 -2 -5 172.36 13.85
 -7 -2 -5 193.82 12.92
 7 -2 6 885.07 56.76
 -7 -2 -6 960.87 57.8
 -7 -2 -6 923.71 57.29
 -7 -2 -6 983.98 56.3
 7 -2 6 1046.08 56.42
 -7 -2 -7 103.52 8.96
 7 -2 7 78.27 8.04
 7 -2 7 84.88 8.64
 -7 -2 -7 74.5 8.76
 -7 -2 -8 15.82 5.67
 -7 -2 -8 18.35 4.35
 7 -2 8 21.95 4.92
 7 -2 8 13.5 4.73
 -7 -2 -8 14.66 5.5
 -7 -2 -9 61.61 7.27
 7 -2 9 48.42 6.46
 7 -2 9 56.35 6.53
 -7 -2 -9 60.85 7.41
 -7 -2 -10 105.68 8.99
 -7 -2 -10 103.38 9.08
 7 -2 10 98.36 8.36
 -7 -2 -11 32.13 4.22
 7 -2 11 23.72 3.8
 7 -2 11 16.19 3.05
 -7 -2 -11 25.74 4.29
 -7 -2 -12 0.08 1.72
 7 -2 12 2.35 1.79
 7 -1 -18 2.67 1.93
 7 -1 -18 1.13 1.53
 7 -1 -17 8.24 3.91
 7 -1 -17 10.97 2.37
 -7 -1 17 11.68 3.37
 -7 -1 17 11.26 2.58
 7 -1 -17 14.24 3.2
 7 -1 -16 4.33 5.06
 7 -1 -16 8.72 2.91
 -7 -1 16 14.29 4.5
 -7 -1 16 9.65 3.14
 7 -1 -16 13.4 3.92
 7 -1 -15 42.39 5.82
 -7 -1 15 32.94 4.36
 7 -1 -15 41.51 5.16
 -7 -1 15 50.04 5.7
 -7 -1 15 51.64 7.19
 7 -1 -14 17.83 5.14
 -7 -1 14 22.27 3.9
 7 -1 -14 16.1 4.67
 -7 -1 14 26.79 6.32
 -7 -1 14 23.33 4.89
 7 -1 -13 17.17 4.96
 -7 -1 13 21.85 4.23
 7 -1 -13 17.18 5.09
 -7 -1 13 32.01 6.8
 -7 -1 13 24.5 4.87
 7 -1 -12 124.88 10.77
 -7 -1 12 132.01 10.47
 -7 -1 12 145.34 11.42
 7 -1 -12 131.42 10.88
 -7 -1 12 132.48 10.94
 7 -1 -11 48.14 6.37
 -7 -1 11 54.75 6.07
 -7 -1 11 52.85 6.6
 7 -1 -11 50.69 6.6
 -7 -1 11 52.51 6.24
 7 -1 -11 50.98 5.4
 7 -1 -10 37.8 5.84
 7 -1 -10 55.78 6.33
 -7 -1 10 47.32 5.73
 -7 -1 10 58.89 6.36
 7 -1 -10 49.46 6.95
 -7 -1 10 43.41 4.54
 -7 -1 10 57.66 5.98
 7 -1 -10 51.86 5.41
 7 -1 -9 310.69 19.03
 -7 -1 9 273.07 18.75
 7 -1 -9 325.2 20.14
 -7 -1 9 332.88 19.44
 -7 -1 9 239.53 17.82
 -7 -1 9 312.8 19.09
 7 -1 -9 286.95 18.84
 7 -1 -9 303.16 18.69
 7 -1 -8 115.94 8.92
 -7 -1 8 104.87 8.74
 7 -1 -8 123.76 9.98
 -7 -1 8 125.77 9.2
 -7 -1 8 127.59 9.24
 -7 -1 8 94.86 8.02
 7 -1 -8 109.42 9
 -7 -1 8 132.63 10.29
 -7 -1 8 128.18 9.03
 7 -1 -8 116.21 8.82
 -7 -1 8 114.18 7.95
 7 -1 -7 368.42 22.56
 -7 -1 7 336.56 22.5
 7 -1 -7 371.88 23.32
 -7 -1 7 363.35 22.75
 -7 -1 7 369.68 22.92
 7 -1 -7 381.58 22.62
 -7 -1 7 334.69 21.77
 -7 -1 7 389.52 23.55
 7 -1 -7 352.2 22.48
 7 -1 -7 382.01 23.27
 -7 -1 7 374.77 22.64
 7 -1 -7 374.8 23.56
 7 -1 -7 398.65 23.09
 -7 -1 7 385.36 21.85
 -7 -1 7 341.65 21.56
 7 -1 -7 366 22.57
 -7 -1 6 304.92 17.91
 -7 -1 6 260.46 18.43
 7 -1 -6 321.22 19.42
 7 -1 -6 270.36 17.94
 -7 -1 6 292.75 18.7
 -7 -1 6 334.5 19.64
 7 -1 -6 313.18 18.73
 -7 -1 6 286.78 18.68
 -7 -1 6 326.13 19.62
 -7 -1 6 267.47 17.86
 7 -1 -6 338.61 19.23
 7 -1 -6 302.39 19.06
 -7 -1 6 320.12 18.66
 7 -1 -6 308.27 19.61
 7 -1 -6 296.68 18.05
 -7 -1 6 289.71 17.79
 7 -1 -6 297.73 18.65
 7 -1 -6 291.05 18.41
 7 -1 -6 287.28 18.01
 -7 -1 5 288.85 17.24
 7 -1 -5 271.97 16.96
 -7 -1 5 278.06 16.91
 -7 -1 5 234.15 15.77
 7 -1 -5 226.6 15.84
 -7 -1 5 279.01 17.19
 -7 -1 5 264.06 16.34
 7 -1 -5 258.17 16.35
 7 -1 -5 252.89 16.69
 7 -1 -5 265.44 17.32
 7 -1 -5 237.85 15.54
 -7 -1 5 271.8 15.84
 7 -1 -5 268.64 16.52
 7 -1 -5 251.22 16.14
 7 -1 -5 281.81 16.94
 7 -1 -5 250.79 15.95
 -7 -1 5 259.16 15.72
 7 -1 -5 288.93 16.73
 -7 -1 4 1085.49 59.55
 7 -1 -4 1043.65 59.18
 -7 -1 4 1139.42 58.58
 7 -1 -4 1138.06 59.4
 -7 -1 4 1082.33 59.67
 7 -1 -4 1131.55 59.62
 7 -1 -4 940.79 58.33
 -7 -1 4 939.93 58.31
 7 -1 -4 993.28 59.16
 7 -1 -4 993.54 58.63
 -7 -1 4 1084.41 58.91
 -7 -1 4 967.42 58.3
 7 -1 -4 1002.48 58.86
 -7 -1 4 1007.78 58.25
 7 -1 -4 999.48 58.47
 7 -1 -4 983.07 58.46
 7 -1 -3 100.29 7.82
 7 -1 -3 106.53 6.56
 7 -1 -3 107.95 7.83
 -7 -1 3 105.57 6.86
 7 -1 -3 100.84 7.78
 -7 -1 3 94.06 7.52
 7 -1 -3 95.26 7.15
 7 -1 -3 93.79 7.06
 -7 -1 3 116.89 8.3
 -7 -1 3 89.54 6.92
 -7 -1 3 100.14 7.82
 -7 -1 3 93.86 7.02
 -7 -1 3 108.39 7.45
 7 -1 -3 98.01 7.29
 7 -1 -3 92.71 7.25
 7 -1 -2 104.48 7.89
 7 -1 -2 100.71 6.62
 -7 -1 2 103.67 7.74
 7 -1 -2 97.31 7.59
 -7 -1 2 95.07 7.61
 -7 -1 2 103.49 7.86
 -7 -1 2 104.1 7.87
 7 -1 -2 96.39 7.16
 -7 -1 2 99.34 6.93
 7 -1 -2 85.91 7.38
 7 -1 -2 90.84 7.16
 7 -1 -1 30.01 3.95
 -7 -1 1 33.7 3.79
 7 -1 -1 30.94 3.07
 7 -1 -1 30.03 3.4
 -7 -1 1 30.16 3.95
 -7 -1 1 33.48 4.14
 7 -1 -1 32.56 3.65
 7 -1 -1 34.24 3.34
 7 -1 -1 32.89 3.45
 7 -1 -1 30.32 3.87
 -7 -1 1 29.15 3.47
 -7 -1 0 103.28 8.15
 7 -1 0 96.81 7.05
 7 -1 0 91.17 7.11
 -7 -1 0 102.77 7.79
 -7 -1 0 89.84 7.17
 7 -1 0 91.41 6.98
 7 -1 0 94.79 6.79
 -7 -1 0 92.98 7.09
 -7 -1 0 116.97 8.04
 7 -1 0 99.49 7.09
 7 -1 0 95.28 7.53
 7 -1 0 96.4 6.99
 -7 -1 0 106.37 7.43
 7 -1 0 96.22 8.51
 -7 -1 0 100.17 7.71
 7 -1 1 373.76 23.75
 7 -1 1 362.37 23.57
 7 -1 1 392.35 23.4
 -7 -1 -1 434.46 24.28
 7 -1 1 382.83 23.6
 7 -1 1 364.54 23.16
 -7 -1 -1 429.28 24.67
 -7 -1 -1 395.49 23.68
 7 -1 1 385.63 23.87
 -7 -1 -1 389.59 23.99
 7 -1 1 404.78 23.35
 -7 -1 -1 402.93 23.86
 7 -1 1 410.67 25.62
 7 -1 1 384.12 22.9
 7 -1 2 541.47 36.75
 -7 -1 -2 664.5 37.55
 7 -1 2 575.01 36.65
 -7 -1 -2 695.52 37.26
 -7 -1 -2 690.88 37.72
 7 -1 2 580.79 36.55
 7 -1 2 616.95 35.96
 -7 -1 -2 603.36 36.76
 7 -1 2 651.36 35.97
 7 -1 2 635.04 36.19
 7 -1 2 608.61 36.82
 -7 -1 -2 632.39 36.84
 7 -1 2 615.14 36.21
 -7 -1 -3 210.51 14.56
 -7 -1 -3 227.31 14.7
 -7 -1 -3 225.38 14.69
 7 -1 3 207.45 14.03
 -7 -1 -3 227.73 14.09
 7 -1 3 204.59 13.52
 7 -1 3 187.38 12.88
 7 -1 3 199.59 13.23
 7 -1 3 208.37 13.91
 7 -1 3 208.88 13.25
 -7 -1 -3 219.23 14.26
 7 -1 3 193.06 12.97
 7 -1 4 277.4 17.41
 -7 -1 -4 312.45 19.35
 7 -1 4 273.78 18.8
 7 -1 4 275.27 17.71
 7 -1 4 282.37 18.17
 7 -1 4 258.42 17.56
 -7 -1 -4 314.08 19.13
 -7 -1 -4 315.41 19.42
 7 -1 4 290.88 18.04
 7 -1 4 294.9 18.49
 7 -1 4 307.16 17.93
 -7 -1 -5 53.88 7.02
 -7 -1 -5 53.12 6.26
 -7 -1 -5 60.5 6.6
 7 -1 5 49.04 4.57
 7 -1 5 46.77 4.76
 -7 -1 -5 66.56 7.31
 7 -1 5 50.03 5.55
 7 -1 5 47.89 5.12
 7 -1 5 54.25 5.46
 7 -1 5 66.54 5.45
 -7 -1 -6 62.7 7.74
 -7 -1 -6 61.8 6.5
 7 -1 6 50.29 4.88
 7 -1 6 63.76 5.85
 -7 -1 -6 70.31 8.14
 7 -1 6 53.47 5.78
 -7 -1 -7 385.77 24.7
 -7 -1 -7 383.86 23.8
 7 -1 7 345.41 23.22
 -7 -1 -8 124.53 10.97
 7 -1 8 108.76 10.07
 7 -1 8 131.74 10.3
 -7 -1 -8 108.21 11.07
 -7 -1 -9 373.16 23.77
 7 -1 9 352.04 23.21
 7 -1 9 346.83 22.93
 -7 -1 -10 9.4 4.15
 7 -1 10 1.98 3.4
 7 -1 10 6.65 2.96
 -7 -1 -11 20.5 3.83
 7 -1 11 15.3 3.57
 7 -1 11 15.15 2.96
 -7 -1 -11 23.69 5.06
 -7 -1 -12 2.17 1.8
 7 -1 12 2.24 2.22
 -7 -1 -12 -2.09 3.03
 -7 -1 -13 68.15 5.02
 7 0 -18 59.46 6.13
 -7 0 18 119.86 7.03
 7 0 -17 71.53 7.27
 -7 0 17 82.5 6.71
 -7 0 17 93.36 7.61
 7 0 -17 72.33 5.87
 -7 0 17 66.41 5.47
 7 0 -17 67.99 6.11
 7 0 -16 -1 2.75
 -7 0 16 0.4 2.41
 7 0 -16 -1.27 5.31
 7 0 -16 -2.39 3.87
 -7 0 16 1.64 4.41
 -7 0 16 0.54 2.18
 -7 0 16 5.01 3.46
 7 0 -15 7.13 3.63
 -7 0 15 6.43 3.22
 7 0 -15 2.48 5.42
 -7 0 15 5.21 4.02
 7 0 -15 6.48 4.48
 -7 0 15 10.76 3.25
 7 0 -14 20.22 6.85
 7 0 -14 17.05 4.29
 -7 0 14 16.87 4.06
 -7 0 14 15.23 4.83
 7 0 -14 15.44 5.36
 -7 0 14 16.11 3.94
 7 0 -13 12.56 3.92
 7 0 -13 14.11 4.25
 -7 0 13 12.41 3.78
 7 0 -13 15.21 6.72
 -7 0 13 22.51 4.94
 -7 0 13 11.98 2.69
 7 0 -13 21.37 5.52
 -7 0 13 17 3.89
 -7 0 13 13.11 3.71
 7 0 -12 -1.1 3.67
 7 0 -12 1.02 3.57
 7 0 -12 -2.9 3.1
 -7 0 12 2.74 3.46
 7 0 -12 9.7 6.23
 -7 0 12 0.22 3.73
 -7 0 12 3.16 2.18
 7 0 -12 7.15 5.36
 -7 0 12 0.75 2.59
 -7 0 12 1.37 3.05
 7 0 -11 42.39 5.62
 7 0 -11 54.19 5.7
 7 0 -11 35.73 4.78
 -7 0 11 44.46 5.56
 -7 0 11 49.13 5.85
 7 0 -11 58.73 7.58
 -7 0 11 44.15 4.66
 7 0 -11 56.13 6.7
 -7 0 11 47.39 5.43
 -7 0 11 40.85 4.86
 7 0 -10 1.59 3.6
 7 0 -10 6.2 3.37
 -7 0 10 2.57 2.2
 7 0 -10 1.91 3.19
 -7 0 10 3.8 2.94
 -7 0 10 2 3.04
 7 0 -10 6.18 4.73
 -7 0 10 3.21 3.34
 7 0 -10 10.27 4.77
 -7 0 10 5.71 2.81
 -7 0 10 2.66 2.42
 7 0 -9 68.24 6.4
 7 0 -9 66.51 6.49
 7 0 -9 87.28 6.17
 -7 0 9 71.84 6.7
 7 0 -9 82.55 7.96
 -7 0 9 80.19 6.97
 -7 0 9 77.22 5.85
 -7 0 9 79.97 6.64
 -7 0 9 77.58 6.34
 7 0 -9 80.49 7.08
 7 0 -8 116.28 8.97
 7 0 -8 115.34 8.97
 -7 0 8 114.01 9.26
 7 0 -8 133.58 10.22
 -7 0 8 123.96 9.48
 -7 0 8 132.19 9.06
 -7 0 8 138.89 8.82
 -7 0 8 129.03 9.2
 7 0 -8 128.14 9.54
 7 0 -8 156.27 8.89
 7 0 -7 211.59 13.99
 -7 0 7 192.61 14
 7 0 -7 222.09 14.94
 -7 0 7 220.34 14.47
 -7 0 7 213.93 14.06
 7 0 -7 212.21 14.42
 7 0 -7 229.05 15.53
 -7 0 7 229.13 14.21
 -7 0 7 234.61 15.33
 -7 0 7 229.97 13.92
 7 0 -7 226.54 14.09
 7 0 -7 203.62 14.86
 7 0 -7 237.14 15.67
 7 0 -7 218.19 14.45
 7 0 -7 261.98 14.02
 7 0 -6 480.42 30.53
 7 0 -6 517.68 31.35
 -7 0 6 484.85 30.82
 -7 0 6 499.49 30.93
 -7 0 6 533.29 31.37
 7 0 -6 584.1 30.76
 -7 0 6 518.1 30.54
 -7 0 6 542.16 31.99
 -7 0 6 495.43 30.68
 7 0 -6 489.49 31.91
 7 0 -6 487.82 30.85
 7 0 -6 488.92 31.62
 7 0 -6 561.33 30.89
 7 0 -6 550.47 32.28
 7 0 -6 516.99 31
 7 0 -6 610.84 30.7
 7 0 -5 839.2 51.4
 7 0 -5 898.84 52.05
 -7 0 5 825.56 51.66
 -7 0 5 922.32 52.2
 7 0 -5 973.27 51.63
 -7 0 5 856.34 51.38
 -7 0 5 791.88 52.41
 -7 0 5 797.3 51.44
 7 0 -5 854.59 52.58
 7 0 -5 847.57 52.72
 -7 0 5 977.3 52.49
 7 0 -5 867.67 51.69
 7 0 -5 1056.48 53
 7 0 -5 977.66 51.82
 7 0 -5 1062.09 51.63
 -7 0 4 671.77 38.08
 -7 0 4 572.8 37.41
 -7 0 4 713.34 38.03
 7 0 -4 645.56 37.38
 -7 0 4 591.14 37.18
 7 0 -4 586.47 38.32
 7 0 -4 710.31 38.56
 7 0 -4 608.78 37.39
 -7 0 4 715.75 37.58
 7 0 -4 697.59 38.68
 7 0 -4 653.53 37.58
 7 0 -4 597.6 37.57
 7 0 -4 695.23 37.38
 7 0 -3 602.73 33.35
 -7 0 3 570.9 32.83
 7 0 -3 618.17 33.46
 7 0 -3 488.8 31.92
 -7 0 3 613.38 32.7
 7 0 -3 539.08 32.14
 -7 0 3 483.45 31.91
 7 0 -3 578.63 32.43
 7 0 -3 566.23 33.4
 -7 0 3 558.96 32.24
 7 0 -3 540.93 32.37
 7 0 -3 577.12 32.15
 -7 0 2 687.28 40.64
 -7 0 2 738.5 40.42
 7 0 -2 709.35 41.14
 -7 0 2 680.85 40.14
 7 0 -2 640.42 40.08
 -7 0 2 670.27 40.04
 -7 0 2 750.55 40.92
 -7 0 1 122.33 7.68
 7 0 -1 115.97 8.78
 7 0 -1 95.13 7.54
 -7 0 1 97.77 7.69
 7 0 -1 107.57 7.81
 -7 0 1 116.82 7.91
 -7 0 1 116.31 8.34
 -7 0 1 109.91 7.8
 7 0 -1 111.68 7.73
 7 0 0 193.42 14.08
 7 0 0 208.68 13.1
 -7 0 0 219.09 12.8
 7 0 0 212.77 13.03
 7 0 0 210.03 13.43
 -7 0 0 217.28 13.67
 -7 0 0 206.63 12.9
 7 0 0 195.93 12.97
 -7 0 0 194.71 13.12
 -7 0 0 192.24 13.46
 -7 0 0 183.86 12.98
 7 0 0 194.83 12.79
 -7 0 -1 51.93 5.13
 7 0 1 49.01 4.58
 7 0 1 52.81 4.84
 -7 0 -1 55.38 5.48
 -7 0 -1 51.04 4.81
 7 0 1 50.28 4.36
 -7 0 -1 54.47 4.68
 7 0 1 48.64 4.68
 -7 0 -1 53 4.79
 7 0 1 51.97 4.85
 7 0 1 43.37 4.48
 7 0 1 52.3 5.6
 7 0 2 66.43 5.72
 7 0 2 63.35 5.73
 7 0 2 54.93 5.26
 7 0 2 62.37 5.64
 7 0 2 63.4 5.25
 -7 0 -2 68.46 5.62
 7 0 2 66.71 5.44
 -7 0 -2 66.57 6.03
 -7 0 -2 53.15 5.36
 7 0 2 69.64 6.59
 7 0 2 61.88 5.45
 -7 0 -2 66.31 6.06
 -7 0 -3 164.1 10.22
 -7 0 -3 141.3 10.81
 -7 0 -3 147.5 10.6
 7 0 3 130.83 10.39
 -7 0 -3 151.33 10.73
 7 0 3 154.66 9.98
 -7 0 -3 159.08 10.8
 -7 0 -3 146.1 10.05
 -7 0 -3 143.31 10.99
 7 0 3 142.54 11.57
 -7 0 -4 15.1 3.5
 7 0 4 16.65 2.79
 7 0 4 14.11 2.87
 -7 0 -4 10.97 3.44
 7 0 4 11.01 3.84
 -7 0 -4 15.83 3.35
 7 0 4 14.61 2.97
 -7 0 -4 13.72 3.99
 -7 0 -4 15 3.23
 7 0 4 16.57 3.18
 7 0 4 21.45 2.65
 7 0 5 1.53 2.67
 -7 0 -5 0.73 3.16
 -7 0 -5 -1.73 4.15
 -7 0 -5 -0.83 2.68
 7 0 5 -1.28 3.85
 -7 0 -5 0.66 2.49
 7 0 5 1.65 2.05
 7 0 5 -0.45 2.17
 7 0 5 0.61 2.42
 -7 0 -5 -1.78 4.5
 7 0 5 -1.47 2.77
 -7 0 -5 0.28 2.77
 -7 0 -6 742.2 49.22
 -7 0 -6 929.67 50.41
 7 0 6 835.86 49.95
 7 0 6 807.8 48.88
 7 0 6 843.42 48.86
 -7 0 -6 793.03 49.19
 7 0 6 863.26 48.66
 7 0 6 894.67 49.43
 -7 0 -7 18.58 5.16
 -7 0 -7 15.45 4.17
 -7 0 -7 24.58 5.63
 7 0 7 19.54 3.49
 7 0 7 22.28 3.16
 7 0 7 21.11 3.72
 7 0 7 17.31 4.23
 -7 0 -8 92.49 8.95
 -7 0 -8 83.89 7.81
 7 0 8 90.66 6.97
 7 0 8 78.29 7.11
 -7 0 -8 92.47 10.17
 7 0 8 92.61 8.39
 7 0 8 93.59 8.25
 -7 0 -8 77.94 8.7
 -7 0 -9 232.81 16.05
 7 0 9 213.16 14.45
 7 0 9 234.94 15.83
 7 0 9 220.96 15.11
 7 0 9 220.79 15.64
 -7 0 -10 57.42 6.02
 7 0 10 45.46 4.58
 7 0 10 48.52 5.89
 -7 0 -10 52.78 7.26
 -7 0 -11 28.41 3.92
 7 0 11 34.81 4.34
 -7 0 -11 31.53 5.58
 7 0 12 15.19 2.63
 -7 0 -12 18.6 3.76
 -7 1 17 14.11 2.91
 -7 1 17 11.68 2.49
 7 1 -17 6.36 3.4
 7 1 -17 8.2 2.94
 -7 1 17 16.43 4.05
 7 1 -17 8.48 2.29
 -7 1 16 10.07 3.25
 -7 1 16 11.76 3.19
 7 1 -16 11.4 4.23
 7 1 -16 10.51 4.66
 -7 1 15 50.66 5.55
 -7 1 15 43.02 5.59
 7 1 -15 45.39 6.42
 7 1 -15 44.1 6.9
 -7 1 15 42.9 4.4
 -7 1 15 40.3 5.1
 7 1 -15 41.3 5.11
 7 1 -14 18.88 4.55
 -7 1 14 19.01 4.56
 -7 1 14 26.83 4.84
 7 1 -14 33.01 6.69
 -7 1 14 23.39 3.58
 -7 1 14 13.55 4.84
 7 1 -14 40.1 6.54
 -7 1 14 19.88 4.19
 7 1 -13 20.14 7.01
 7 1 -13 30.68 5.42
 7 1 -13 26.49 4.18
 -7 1 13 29 4.93
 -7 1 13 21.4 4.53
 7 1 -13 23.93 6.61
 -7 1 13 28.28 4.05
 -7 1 13 23.23 5.14
 7 1 -13 28.6 6.54
 -7 1 13 26.63 4.69
 7 1 -12 117.24 12.41
 7 1 -12 158.82 10.96
 -7 1 12 140.04 11.34
 7 1 -12 136.57 12.55
 -7 1 12 142.14 11.46
 -7 1 12 164.8 10.37
 -7 1 12 128.96 11.6
 -7 1 12 161.76 11.05
 7 1 -12 184.32 12.31
 7 1 -11 62.06 6.34
 -7 1 11 49.83 5.96
 -7 1 11 52.76 6
 7 1 -11 51.45 7.54
 -7 1 11 48.8 6.22
 -7 1 11 61.02 5.68
 7 1 -11 73.15 7.15
 7 1 -10 70.64 6.46
 -7 1 10 52.21 5.65
 7 1 -10 49.7 6.93
 -7 1 10 52.04 6.05
 7 1 -10 45.14 6.82
 -7 1 10 50.9 5.43
 7 1 -10 75.77 6.95
 7 1 -9 314.29 20.59
 7 1 -9 294.23 20.57
 -7 1 9 287.38 19.85
 -7 1 9 303.71 20.19
 7 1 -9 326.37 20.49
 -7 1 9 316.45 19.87
 7 1 -8 121.27 9.51
 -7 1 8 122.67 8.81
 7 1 -8 112.52 9.37
 -7 1 8 110.04 8.57
 -7 1 8 108.58 8.8
 7 1 -8 119.87 9.34
 -7 1 8 114.77 8.57
 7 1 -8 152.43 9.78
 7 1 -7 367.39 22.38
 -7 1 7 393.13 23.26
 -7 1 7 354.05 22.05
 7 1 -7 358.34 22.38
 -7 1 7 332.17 21.89
 -7 1 7 435.34 22.4
 7 1 -7 365.78 22.28
 7 1 -7 342.37 23.74
 -7 1 7 318.72 22.07
 -7 1 7 348.97 21.91
 7 1 -7 399.09 22.75
 7 1 -6 284.35 18.27
 -7 1 6 291.16 18.13
 -7 1 6 328.06 18.42
 7 1 -6 296.46 19.51
 -7 1 6 250.63 17.92
 -7 1 6 314.58 19.19
 7 1 -6 264.62 19.61
 7 1 -6 278.87 18.18
 -7 1 6 279.46 17.95
 7 1 -6 342.64 18.9
 7 1 -6 313.56 19.53
 7 1 -6 328.39 18.68
 7 1 -5 241.56 16.35
 -7 1 5 267.3 16.51
 -7 1 5 244.62 16.23
 -7 1 5 307.97 17.5
 7 1 -5 281.52 17.62
 -7 1 5 281.62 17.4
 -7 1 5 231.03 16.05
 7 1 -5 239.74 17.94
 7 1 -5 266.29 16.35
 7 1 -5 283.93 16.95
 -7 1 5 281.5 16.48
 7 1 -5 298.92 16.87
 -7 1 4 1069.15 62.51
 7 1 -4 1169.8 62.25
 -7 1 4 969.06 62.09
 -7 1 4 1178.45 63.28
 -7 1 4 1092.2 63.24
 -7 1 4 1072.54 62.23
 7 1 -4 993.08 63.99
 7 1 -4 1034.05 63.36
 7 1 -4 1093.01 63.39
 7 1 -4 1191.1 62.98
 7 1 -4 1136.31 62.52
 -7 1 3 106.68 7.2
 -7 1 3 98.22 7.38
 7 1 -3 108.33 7.27
 -7 1 3 105.37 7.77
 7 1 -3 85.41 8.5
 -7 1 3 87.84 7.05
 7 1 -3 108.94 8.27
 7 1 -3 98.62 7.98
 -7 1 3 111.25 7.37
 7 1 -3 106.55 7.66
 7 1 -3 103.28 7.44
 -7 1 3 107.62 8.13
 7 1 -2 92.4 6.85
 -7 1 2 115.14 7.79
 -7 1 2 93.37 6.86
 7 1 -2 98.32 7.86
 7 1 -2 113.56 7.32
 7 1 -2 101.34 8.06
 -7 1 2 102.3 6.96
 -7 1 2 86.54 6.83
 7 1 -2 102.98 7.87
 -7 1 2 104.75 7.23
 7 1 -2 108.01 7.59
 -7 1 2 84.9 7.71
 7 1 -2 94.32 7.13
 -7 1 1 31.42 3.32
 7 1 -1 34.95 4.28
 7 1 -1 33.98 3.77
 7 1 -1 31.4 4.02
 7 1 -1 35.14 4
 7 1 -1 30.76 3.56
 -7 1 1 32.76 3.57
 -7 1 1 30.73 3.24
 7 1 -1 38.59 3.81
 7 1 0 101.29 8.48
 7 1 0 98.86 7.22
 7 1 0 98.83 7.96
 -7 1 0 103.89 7.53
 -7 1 0 101.53 8.25
 -7 1 0 89.81 7.25
 -7 1 0 110.08 7.72
 7 1 0 108.4 7.36
 7 1 1 389.37 25.33
 7 1 1 400.85 24.47
 -7 1 -1 489.88 24.29
 -7 1 -1 451.64 24.22
 7 1 1 337.89 23.44
 -7 1 -1 387.72 24.11
 -7 1 -1 403.46 24.91
 7 1 1 397.74 24.76
 -7 1 -1 390.84 25.04
 -7 1 -1 377.36 24.11
 -7 1 -1 374.85 24.13
 7 1 1 404.25 23.65
 7 1 1 383.7 24.7
 7 1 2 670.53 38.36
 -7 1 -2 668.21 38.36
 7 1 2 662.65 37.94
 -7 1 -2 720 38.42
 -7 1 -2 596.81 38.31
 7 1 2 598.85 38.85
 7 1 2 628.62 37.75
 7 1 3 205.13 13.84
 7 1 3 205.29 13.35
 7 1 3 199.62 13.09
 -7 1 -3 211.82 13.84
 7 1 4 302.12 19.83
 -7 1 -4 288.56 19.64
 7 1 4 299.04 19.22
 -7 1 -4 346.01 19.77
 -7 1 -5 63.26 6.55
 7 1 5 50.22 6.07
 -7 1 -5 47.14 6.57
 7 1 5 58.99 5.59
 -7 1 -5 55.15 6.08
 7 1 5 58.39 5.77
 -7 1 -6 60.29 7.06
 7 1 6 56.9 6.81
 -7 1 -6 73.62 7.26
 7 1 6 66.39 5.98
 7 1 6 66.89 6.24
 -7 1 -6 55.5 7.41
 -7 1 -6 65.38 6.93
 7 1 6 53.16 6.41
 -7 1 -7 402.14 24.86
 -7 1 -7 357.01 24.22
 7 1 7 361.59 24.23
 -7 1 -7 339.83 23.84
 7 1 7 404.77 23.83
 -7 1 -7 355.94 24.79
 7 1 7 411.66 23.65
 7 1 7 375.09 24.04
 -7 1 -7 372.14 24.25
 -7 1 -8 122.44 10.85
 -7 1 -8 105.9 9.47
 -7 1 -8 83.03 9.27
 7 1 8 117.33 8.92
 -7 1 -8 121.42 10.4
 7 1 8 118.01 9.27
 -7 1 -8 107.73 10.56
 7 1 8 116.7 9.6
 -7 1 -8 112.64 9.49
 -7 1 -9 308.62 21.98
 7 1 9 383.75 21.42
 -7 1 -9 381.23 23.23
 7 1 9 378.46 22.02
 7 1 9 354.92 21.93
 -7 1 -9 340.09 23.35
 7 1 9 370.19 22.34
 7 1 9 352.63 22.44
 -7 1 -9 294.89 21.97
 -7 1 -9 300.39 23.04
 -7 1 -10 2.79 4.26
 7 1 10 5.64 2.5
 7 1 10 6.23 2.95
 -7 1 -10 9.8 3.94
 7 1 11 16.28 2.83
 7 1 11 18.19 2.84
 -7 1 -11 15.67 4.16
 7 1 12 2.61 1.51
 -7 1 -12 3.34 2.57
 -7 2 17 81.51 5.45
 -7 2 17 71.43 5.97
 7 2 -16 3.3 2.53
 -7 2 16 7.95 2.3
 -7 2 16 6.4 2.83
 7 2 -16 7.16 3.26
 7 2 -16 10.71 3.88
 -7 2 16 6.34 1.99
 7 2 -15 22.96 4.26
 -7 2 15 23.71 4.1
 -7 2 15 21.32 3.58
 -7 2 15 30.05 3.73
 7 2 -15 25.47 4.8
 7 2 -15 33.06 5.45
 7 2 -14 23.91 6.55
 -7 2 14 33.05 3.6
 7 2 -14 38.42 5.76
 7 2 -14 34.4 4.66
 -7 2 14 26.91 4.92
 -7 2 14 32.68 4.35
 7 2 -14 29.49 5.48
 -7 2 14 41.73 4.57
 -7 2 14 27.46 4.96
 -7 2 14 26.98 4.63
 7 2 -13 78.05 6.67
 -7 2 13 51.07 6.4
 -7 2 13 65.91 6.15
 -7 2 13 50.61 5.77
 7 2 -13 54.12 7.2
 -7 2 13 46.45 6.21
 -7 2 13 51.1 5.81
 7 2 -13 65.68 7.6
 -7 2 12 101.18 9.38
 7 2 -12 101.71 9.91
 -7 2 12 110.32 8.87
 7 2 -12 120.14 10.84
 -7 2 12 120.33 9.15
 7 2 -11 27.45 7.23
 -7 2 11 24.47 4.41
 -7 2 11 18.35 3.58
 7 2 -11 19.2 5.08
 -7 2 11 19.87 4.24
 7 2 -11 32.38 6.39
 -7 2 11 23.35 4.1
 7 2 -10 288.59 18.88
 -7 2 10 294.28 18.05
 7 2 -10 260.45 18.12
 -7 2 10 248.19 17.29
 -7 2 10 253.3 17.8
 7 2 -10 297.42 18.71
 -7 2 10 274.79 17.69
 7 2 -9 198.38 13.77
 -7 2 9 202.17 12.82
 7 2 -9 166.77 12.75
 -7 2 9 159.91 12.37
 7 2 -9 188.82 13.36
 -7 2 9 184.57 12.41
 7 2 -8 274.07 17.5
 -7 2 8 279.63 16.99
 -7 2 8 235.06 16.67
 7 2 -8 272.88 17.31
 -7 2 8 259.83 16.67
 7 2 -7 66.46 6.75
 -7 2 7 66.64 5.49
 -7 2 7 49.13 5.03
 7 2 -7 67.22 6.21
 -7 2 7 57.53 5.11
 7 2 -6 90.26 7.4
 -7 2 6 90.64 6.84
 -7 2 6 91.73 7.37
 7 2 -6 89.86 7.25
 -7 2 6 85.82 6.53
 7 2 -5 6.73 3.17
 -7 2 5 4.06 2.11
 -7 2 5 1.97 1.85
 -7 2 5 1.77 1.69
 7 2 -5 5.02 2.9
 -7 2 5 2.96 1.55
 7 2 -5 2.76 2.15
 -7 2 4 584.98 38.25
 -7 2 4 648.24 39.42
 -7 2 4 683.97 38.72
 7 2 -4 660.36 39.63
 7 2 -4 768.69 39.11
 -7 2 4 683.82 39.71
 7 2 -3 361.77 21.71
 -7 2 3 324.87 19.99
 -7 2 3 309.93 20.88
 7 2 -3 296.58 22.37
 -7 2 3 316.98 19.94
 7 2 -3 330.59 20.86
 -7 2 3 332.22 21.12
 7 2 -3 365.98 20.29
 -7 2 2 537.26 28.7
 7 2 -2 544.25 28.55
 7 2 -2 406.79 30.76
 -7 2 2 423.73 28.36
 7 2 -2 491.33 30.09
 7 2 -2 508.74 29.86
 7 2 -2 505.8 29.84
 7 2 -2 436.51 29.11
 -7 2 2 524.79 28.94
 7 2 -2 504.55 29.56
 -7 2 2 449.4 28.22
 -7 2 2 475.89 29.82
 7 2 -2 487.68 28.55
 -7 2 1 890.22 52.55
 -7 2 1 893.89 52.27
 7 2 -1 924.98 51.99
 7 2 -1 988.04 54.23
 7 2 -1 943.75 53.75
 7 2 -1 928.52 53.53
 7 2 -1 923.82 53.33
 -7 2 1 874.71 52.28
 -7 2 1 866.21 53.71
 7 2 0 17.23 3.07
 7 2 0 12.62 2.78
 -7 2 0 13 2.42
 7 2 0 14.09 3.22
 -7 2 0 13.41 2.53
 -7 2 0 12.09 2.12
 -7 2 0 15.69 3.19
 7 2 1 80.03 6.31
 -7 2 -1 103.14 7.2
 -7 2 -1 77.85 6.54
 -7 2 -1 79.21 6.95
 7 2 1 86.3 6.45
 7 2 2 191.2 12.22
 -7 2 -2 187.94 12.13
 -7 2 -2 161.71 11.92
 7 2 2 165.11 11.26
 7 2 3 81.92 7.25
 -7 2 -3 93.68 7.59
 -7 2 -3 88.39 7.83
 7 2 3 88.37 7.04
 7 2 4 99.78 8.18
 -7 2 -4 110.53 8.71
 7 2 4 95.52 7.59
 -7 2 -4 85.43 8.02
 7 2 5 173.24 12.63
 7 2 5 181.98 12.34
 -7 2 -5 153.88 12.29
 7 2 5 166.85 11.95
 -7 2 -5 174.9 13.11
 -7 2 -5 197.25 13.18
 7 2 5 187.03 12.6
 7 2 6 892.26 56.98
 7 2 6 893.63 56.35
 7 2 6 998.91 56.85
 -7 2 -6 905.02 57.38
 -7 2 -6 1041.58 57.6
 7 2 6 997.96 57.13
 -7 2 -7 96.01 9.09
 -7 2 -7 74.1 7.52
 7 2 7 80.46 7.67
 7 2 7 88.3 7.62
 7 2 7 92.66 7.67
 7 2 7 90.78 7.79
 -7 2 -7 73.73 8.59
 -7 2 -7 88.28 8.45
 7 2 7 93.92 7.9
 -7 2 -8 21.93 6.39
 -7 2 -8 13.81 5.91
 7 2 8 12.8 3.7
 7 2 8 22.43 4.08
 7 2 8 15.89 4.12
 -7 2 -8 19.59 5.66
 -7 2 -8 17.67 5.56
 7 2 8 18.75 4.04
 -7 2 -9 62.99 8.06
 -7 2 -9 46.11 7.21
 7 2 9 69.82 6.28
 7 2 9 62.17 5.99
 7 2 9 60.03 6.04
 -7 2 -9 50.63 6.9
 7 2 9 62.69 5.63
 7 2 9 60.99 6.12
 -7 2 -9 57.56 7.7
 -7 2 -9 57.58 7.35
 7 2 10 103.02 7.5
 -7 2 -10 121.11 9.28
 -7 2 -10 98.57 9.28
 7 2 10 115.15 8.18
 7 2 10 93.47 7.78
 7 2 10 116.57 7.9
 -7 2 -10 83.42 8.54
 -7 2 -10 89.87 9.68
 7 2 11 26.34 2.8
 -7 2 -11 28.66 4.61
 7 2 11 28.76 3.37
 -7 2 -11 24.03 3.66
 -7 2 -11 33.62 4.21
 7 2 12 2.7 1.42
 -7 2 -12 0.64 2.17
 7 3 -16 0.71 2.15
 -7 3 16 4.24 2.13
 -7 3 16 4.33 1.53
 7 3 -15 33.82 3.8
 -7 3 15 39.75 4.08
 7 3 -15 42.66 5.06
 -7 3 15 34.54 3.97
 7 3 -15 39.85 4.76
 7 3 -14 114.07 10.63
 7 3 -14 148.36 9.6
 -7 3 14 144.9 9.11
 -7 3 14 107.65 9.41
 -7 3 14 141.11 9.62
 7 3 -14 111.8 10.24
 -7 3 14 117.74 9.42
 7 3 -14 143.37 10.44
 7 3 -13 16.39 6.11
 7 3 -13 22.9 5.55
 -7 3 13 9.75 3.75
 -7 3 13 14.4 3.54
 -7 3 13 8.47 3.15
 7 3 -13 16.37 5.76
 -7 3 13 12 3.26
 7 3 -12 48.3 7.49
 -7 3 12 44.35 5.46
 -7 3 12 36.02 4.85
 7 3 -12 39.8 6.9
 -7 3 12 39.55 4.77
 7 3 -11 31.88 6.9
 -7 3 11 35.7 5.08
 -7 3 11 27.13 4.24
 7 3 -11 33.03 6.29
 -7 3 11 37.79 4.67
 7 3 -10 315.83 20.34
 -7 3 10 328.19 19.82
 -7 3 10 258.33 19.08
 7 3 -10 312.87 20.03
 -7 3 10 306.56 19.24
 7 3 -9 76.64 8.33
 -7 3 9 72.45 6.63
 7 3 -9 71.13 7.56
 -7 3 9 71.43 6.28
 7 3 -8 898.31 51.04
 -7 3 8 920.15 50.79
 7 3 -8 864.58 50.73
 -7 3 8 802.48 50.25
 7 3 -7 377.86 23.2
 -7 3 7 391.4 22.9
 7 3 -7 371.9 22.96
 -7 3 7 348.34 22.44
 7 3 -6 49.55 5.63
 -7 3 6 45.31 4.56
 7 3 -6 49.77 5.29
 -7 3 5 99.31 7.81
 -7 3 5 132.28 8.62
 -7 3 4 156.19 10.58
 -7 3 3 465.69 30.37
 -7 3 3 547.94 31
 7 3 -3 552.17 30.76
 -7 3 2 409.43 22.79
 -7 3 2 341.34 22.61
 -7 3 1 50.87 4.46
 -7 3 1 45.06 4.41
 7 3 0 333.63 18.9
 -7 3 0 343.4 19.69
 -7 3 -1 197.49 12.46
 -7 3 -1 160.94 12.07
 7 3 1 175.83 11.58
 7 3 2 182.94 11.83
 -7 3 -2 169.36 11.62
 -7 3 -2 142.6 11.28
 7 3 3 509.86 31.26
 7 3 3 521.67 30.9
 -7 3 -3 575.62 31.83
 -7 3 -3 471.77 31.03
 7 3 4 280.9 18.18
 -7 3 -4 308.88 18.79
 -7 3 -4 252.67 17.9
 7 3 4 283.07 17.74
 7 3 5 787.42 47.76
 7 3 5 914.34 47.94
 7 3 5 786.16 47.3
 -7 3 -5 833.54 48.32
 -7 3 -5 925.65 48.86
 7 3 5 876.45 48.11
 -7 3 -6 29.76 6.64
 7 3 6 32.7 4.71
 7 3 6 30.05 4.36
 -7 3 -6 26.14 5.18
 -7 3 -6 34.57 5.74
 7 3 6 34.98 4.49
 -7 3 -7 334.26 21.84
 7 3 7 319.81 20.16
 7 3 7 346.72 20.66
 7 3 7 337.97 20.52
 -7 3 -7 273.11 20.53
 -7 3 -7 323.54 21.06
 7 3 7 308.16 20.26
 -7 3 -8 66.06 7.05
 7 3 8 69.58 6.31
 7 3 8 67.49 6.25
 -7 3 -8 56.11 6.63
 7 3 8 62.72 5.94
 -7 3 -9 46.27 7.14
 7 3 9 69.53 5.77
 7 3 9 53.36 5.26
 -7 3 -9 57.53 7.2
 -7 3 -9 43.02 5.46
 7 3 9 52.85 4.99
 7 3 9 55.21 5.25
 -7 3 -9 64.42 6.95
 7 3 10 0.47 1.72
 -7 3 -10 5.43 4.29
 7 3 10 0.34 2.12
 7 3 10 1.73 2.09
 7 3 10 -0.22 1.87
 -7 3 -10 -1.56 3.7
 -7 3 -10 2.76 3.77
 7 3 11 51.41 3.84
 7 3 11 55.04 4.29
 7 3 11 50.19 3.92
 -7 3 -11 52.75 4.68
 7 4 -15 5.69 2.16
 -7 4 15 9.08 1.8
 -7 4 15 7.6 1.93
 7 4 -15 8.06 2.14
 7 4 -14 0.31 3.61
 7 4 -14 7.62 3.28
 7 4 -14 9.31 2.84
 -7 4 14 9.26 2.49
 -7 4 14 5.62 1.95
 7 4 -14 10.56 2.99
 7 4 -13 18.45 5.04
 -7 4 13 30.28 4.01
 7 4 -13 29.14 4.71
 -7 4 13 29.2 3.4
 7 4 -12 19.53 5.38
 -7 4 12 27.75 4.04
 -7 4 12 29.74 4.19
 7 4 -12 28.58 5.09
 -7 4 12 25.34 3.45
 7 4 -11 26.44 5.69
 -7 4 11 22.55 3.74
 7 4 -11 24.12 4.88
 -7 4 11 20.16 3.2
 7 4 -10 266.52 17.24
 -7 4 10 269.49 16.78
 7 4 -10 254.76 16.85
 -7 4 10 233.25 16.09
 7 4 -9 45.56 6.4
 -7 4 9 49 5.1
 7 4 -9 52.63 6.03
 -7 4 9 45.4 4.53
 7 4 -8 56.47 6.33
 -7 4 8 48.54 5.17
 7 4 -8 60.63 5.91
 7 4 -7 36.98 5.24
 -7 4 7 34.93 4.05
 -7 4 6 198.4 13.41
 -7 4 5 113.81 8.47
 7 4 -4 26.7 3.88
 -7 4 4 17.07 3.02
 -7 4 3 121.79 8.76
 -7 4 2 214.88 13.94
 -7 4 0 186.09 12.85
 -7 4 -1 76.67 6.59
 -7 4 -1 69.41 6.31
 7 4 2 229.08 14.76
 -7 4 -2 213.46 14.62
 -7 4 -3 30.39 4
 7 4 3 30.23 3.78
 -7 4 -3 36.2 4.94
 7 4 4 185.5 11.83
 7 4 4 154.19 11.15
 -7 4 -4 171.13 12.26
 7 4 4 176.46 11.68
 -7 4 -5 30.88 5.34
 7 4 5 31.47 3.98
 -7 4 -5 35.65 5.02
 7 4 5 31.97 3.77
 -7 4 -6 24.17 5.66
 7 4 6 19.68 3.07
 7 4 6 22.68 3.57
 -7 4 -6 18.94 4.06
 -7 4 -6 24.57 4.58
 7 4 6 22.42 3.07
 -7 4 -7 27.85 5.32
 7 4 7 25.62 3.14
 7 4 7 29.84 3.75
 7 4 7 28.17 3.56
 -7 4 -7 27.48 4.48
 -7 4 -7 18.32 3.74
 -7 4 -8 75.28 7.15
 7 4 8 64.8 5.47
 -7 4 -8 76.72 7.8
 7 4 8 67.87 5.7
 -7 4 -8 67.99 6.27
 -7 4 -8 75.7 7.25
 -7 4 -9 120.79 10.05
 -7 4 -9 111.79 10.16
 7 4 9 138.97 9.26
 -7 4 -9 140.79 10.23
 7 4 10 59.42 4.37
 -7 4 -10 62.75 5.08
 7 4 10 65.53 4.61
 -7 4 -10 50.3 4.84
 -7 5 13 80.7 5.54
 -7 5 13 74.29 5.38
 -7 5 13 83.95 5.59
 7 5 -13 70.98 5.82
 7 5 -12 69.91 5.31
 -7 5 12 54.91 4.53
 7 5 -12 64.54 5.3
 7 5 -11 29.77 4.1
 -7 5 11 32.54 3.39
 -7 5 11 36.55 3.73
 7 5 -10 36.6 4.71
 -7 5 10 37.43 3.89
 -7 5 9 56.12 5.28
 7 5 -9 71.72 6.48
 -7 5 8 41.66 4.26
 -7 5 7 33.56 3.85
 -7 5 7 33.06 3.83
 7 5 -6 54.67 5.44
 -7 5 3 110.34 8.04
 -7 5 1 3.92 2.27
 -7 5 0 180.27 12.26
 -7 5 -1 162.44 11.04
 -7 5 -2 89.08 7.36
 -7 5 -3 120.4 8.95
 -7 5 -4 31.84 3.96
 7 5 4 34.71 3.64
 -7 5 -4 41.34 4.69
 7 5 5 78.33 5.9
 -7 5 -5 71.04 6.5
 -7 5 -6 31.8 4.44
 7 5 6 27.71 2.74
 7 5 6 26.24 2.95
 -7 5 -6 25.03 3.57
 -7 5 -7 15.63 3.22
 -7 5 -7 9.74 4.3
 7 5 7 16.67 2.33
 -7 5 -7 8.41 3.26
 7 5 7 12.2 1.86
 -7 5 -8 70.77 5.67
 -7 5 -8 81.62 6.26
 -7 5 -8 63.94 5.71
 7 5 8 91.72 5.45
 7 6 -10 14.15 2.04
 -7 6 10 11.96 1.71
 7 6 -9 113.46 7.38
 -7 6 9 107.41 7.21
 7 6 -8 68.43 5.22
 -7 6 8 65.22 4.97
 7 6 -7 29.89 3.23
 -7 6 7 20.36 2.62
 7 6 -6 179.07 10.51
 -7 6 6 152.17 10.4
 -7 6 4 5.68 1.91
 -7 6 2 1.6 1.84
 -7 6 0 3.23 2.03
 -7 6 -1 22.79 2.72
 -7 6 -2 126.63 8.42
 -7 6 -3 76.59 5.47
 -7 6 -3 58.42 4.69
 -7 6 -4 1.59 1.8
 -7 6 -5 16.09 2.43
 8 -6 -9 40.27 3.81
 8 -6 -8 111.68 7.94
 -8 -6 8 116.21 7.62
 8 -6 -8 103.81 7.54
 8 -6 -7 7.72 3.04
 -8 -6 7 6.08 2.12
 8 -6 -7 6.3 2.41
 8 -6 -6 18.93 4.01
 -8 -6 6 23.39 2.98
 8 -6 -6 21.44 3.35
 8 -6 -5 54.19 5.78
 -8 -6 5 62.87 5.03
 8 -6 -5 60.44 5.42
 -8 -6 4 7.32 2.12
 8 -6 -4 8.67 3.58
 -8 -6 4 10.37 2.88
 8 -6 -4 11.29 2.97
 8 -6 -3 24.24 4.37
 -8 -6 3 27.14 2.91
 -8 -6 3 19.83 3.67
 8 -6 -3 27.64 3.81
 8 -6 -2 62.86 6.05
 -8 -6 2 55.49 5.65
 8 -6 -2 53.42 5.19
 8 -6 -1 58.95 5.61
 -8 -6 1 73.99 6.43
 8 -6 -1 75.89 5.88
 8 -6 0 83.15 6.59
 -8 -6 0 89.58 7.28
 8 -6 0 93.39 6.72
 8 -6 1 75.22 5.93
 -8 -6 -1 77.96 6.61
 8 -6 1 88.97 6.14
 8 -6 2 62.58 4.86
 -8 -6 -2 58.65 5.35
 8 -6 2 69.51 4.98
 8 -6 3 8.42 2.02
 8 -6 3 12.55 2
 -8 -6 -4 16.11 2.13
 8 -5 -13 8.26 1.79
 -8 -5 12 1.71 1.35
 8 -5 -12 1.06 2.3
 8 -5 -12 2.6 2.09
 8 -5 -11 14.03 3.4
 -8 -5 11 14.69 2.63
 -8 -5 11 11.55 2.34
 8 -5 -11 16.53 3.24
 8 -5 -10 231.21 16.37
 -8 -5 10 251.13 16.15
 -8 -5 10 265.45 15.96
 8 -5 -10 257.69 16.46
 8 -5 -9 74.26 7.1
 -8 -5 9 63.71 7.02
 -8 -5 9 76.34 6.65
 -8 -5 9 67.02 6.1
 8 -5 -9 76.67 7.02
 -8 -5 8 152.13 12.28
 8 -5 -8 147.64 11.68
 -8 -5 8 148 11.2
 -8 -5 8 157.14 11.05
 8 -5 -8 162.12 11.65
 8 -5 -7 10.79 4.74
 -8 -5 7 8.68 3.33
 8 -5 -7 17.64 4.5
 8 -5 -6 129.54 10.44
 -8 -5 6 131.6 9.89
 -8 -5 6 100.23 9.59
 8 -5 -6 128.66 10.15
 8 -5 -5 218.97 15.42
 -8 -5 5 214.12 14.67
 -8 -5 5 191.23 15.08
 -8 -5 5 233.01 14.75
 8 -5 -5 205.18 15.06
 -8 -5 4 18.25 3.8
 8 -5 -4 22.4 5.33
 -8 -5 4 18.5 3.97
 -8 -5 4 19.5 4.83
 8 -5 -4 18.41 4.64
 8 -5 -4 15.12 4.86
 8 -5 -3 15.19 5.29
 -8 -5 3 20.89 3.77
 -8 -5 3 18.95 5
 8 -5 -3 31.34 5.66
 8 -5 -3 17.24 4.78
 -8 -5 2 83.64 8.06
 8 -5 -2 94.84 8.95
 -8 -5 2 97.71 7.68
 8 -5 -2 109.85 9.54
 -8 -5 2 84.47 8.72
 8 -5 -2 90.29 8.43
 -8 -5 1 7.75 3.71
 8 -5 -1 11.15 5
 -8 -5 1 8.29 2.66
 -8 -5 1 8.47 4.52
 8 -5 -1 9.99 5.07
 8 -5 -1 7.15 4.17
 -8 -5 0 21.25 4.91
 8 -5 0 24.87 5.48
 -8 -5 0 23.94 5.19
 8 -5 0 23.43 4.65
 -8 -5 -1 159.39 11.44
 8 -5 1 113.65 9.4
 8 -5 1 109.59 9.9
 8 -5 1 142.54 10.23
 -8 -5 -2 132.86 10.42
 8 -5 2 108.92 8.57
 8 -5 2 97.46 9.3
 8 -5 2 122.95 9.22
 8 -5 3 35.12 4.25
 8 -5 3 32.69 5.21
 -8 -5 -3 29.71 5.22
 8 -5 3 39.06 4.99
 8 -5 4 170.84 11.41
 8 -5 4 162.15 12.77
 -8 -5 -4 175.27 12.54
 8 -5 4 206.55 12.21
 8 -5 5 33.79 3.49
 8 -5 5 34.59 4.74
 -8 -5 -5 29.33 4.2
 8 -5 5 39.63 4.18
 8 -5 6 9.77 1.77
 8 -5 6 6.79 2.81
 8 -5 7 3.7 1.96
 8 -4 -15 10.01 2.07
 8 -4 -14 36.34 4.05
 8 -4 -14 36.01 4.16
 -8 -4 14 38.81 4.28
 8 -4 -14 42.5 4.27
 8 -4 -13 8.6 3.51
 8 -4 -13 9.8 3.38
 -8 -4 13 7.66 2.91
 -8 -4 13 9.7 3.23
 -8 -4 13 7.24 1.8
 8 -4 -13 7.36 3.35
 8 -4 -12 71.99 7.47
 8 -4 -12 80.22 7.23
 -8 -4 12 61.15 7.08
 -8 -4 12 78.9 7.33
 -8 -4 12 73.42 6.09
 -8 -4 12 79.41 5.83
 8 -4 -12 75.91 7.2
 8 -4 -11 1.75 4.25
 8 -4 -11 -0.18 3.79
 8 -4 -11 -0.26 2.51
 -8 -4 11 3.74 4.47
 -8 -4 11 3.26 3.79
 -8 -4 11 -1.02 2.55
 -8 -4 11 1.45 2.25
 8 -4 -11 1.61 3.97
 8 -4 -10 95.52 9.25
 -8 -4 10 87.14 7.77
 8 -4 -10 84.54 8.34
 -8 -4 10 87.13 9.48
 8 -4 -10 92.27 7.81
 -8 -4 10 91.15 8.61
 -8 -4 10 85.76 7.28
 8 -4 -10 83.34 8.48
 8 -4 -9 301.99 19.87
 -8 -4 9 242.68 18.23
 -8 -4 9 276.21 18.29
 8 -4 -9 264.4 18.74
 -8 -4 9 282.08 20.24
 8 -4 -9 286.06 18.47
 -8 -4 9 281.27 19.05
 -8 -4 9 266.43 17.8
 8 -4 -9 282.89 18.97
 8 -4 -8 105.18 10.79
 -8 -4 8 78.97 9.31
 8 -4 -8 112.28 10.09
 -8 -4 8 128.25 11.52
 8 -4 -8 125.14 9.9
 -8 -4 8 116.24 9.63
 -8 -4 8 115.98 10.08
 -8 -4 8 117.36 9.14
 8 -4 -8 121.78 10.28
 8 -4 -7 66.73 8.43
 -8 -4 7 63.49 7.58
 8 -4 -7 77.57 7.69
 8 -4 -7 63.69 7.78
 -8 -4 7 71.11 8.63
 -8 -4 7 77.44 7.53
 -8 -4 7 74.22 7.1
 8 -4 -7 66.3 7.9
 8 -4 -6 100.5 10.47
 -8 -4 6 98.94 9.82
 8 -4 -6 100.55 9.6
 -8 -4 6 119.12 10.73
 8 -4 -6 107.54 9.26
 8 -4 -6 92.45 9.05
 -8 -4 6 102.53 8.88
 8 -4 -6 107.4 9.83
 8 -4 -5 98.62 8.91
 -8 -4 5 100.94 9.44
 8 -4 -5 86.02 8.81
 -8 -4 5 101.51 10.15
 8 -4 -5 103.34 9.28
 8 -4 -5 88.29 9
 -8 -4 5 83.71 8.42
 8 -4 -4 456.79 29.51
 -8 -4 4 471.18 30.22
 -8 -4 4 465.49 29.15
 -8 -4 4 498.32 31.1
 8 -4 -4 471.93 29.95
 -8 -4 4 481.72 29.07
 8 -4 -4 445.81 29.21
 -8 -4 3 264.84 18.76
 -8 -4 3 281.38 19.45
 8 -4 -3 248.56 18.5
 -8 -4 3 294.76 20.1
 8 -4 -3 271.95 18.6
 -8 -4 3 291.18 18.52
 8 -4 -3 289.65 19.46
 -8 -4 3 293.06 18.28
 -8 -4 3 251.58 18.72
 -8 -4 2 172.12 13.47
 -8 -4 2 174.63 13.87
 -8 -4 2 166 13.32
 8 -4 -2 167.05 13.04
 -8 -4 2 183.37 12.58
 8 -4 -2 175.78 13.77
 -8 -4 1 126.08 11.14
 -8 -4 1 136.2 11.25
 -8 -4 1 119.31 10.7
 8 -4 -1 114.59 10.24
 -8 -4 1 137.65 9.76
 8 -4 -1 107.46 9.64
 8 -4 -1 123.41 11.07
 -8 -4 0 107.22 10.6
 8 -4 0 116.08 9.94
 8 -4 0 94.84 9.54
 8 -4 0 102.43 10.47
 -8 -4 -1 -1.68 3.14
 -8 -4 -1 0.78 4.69
 8 -4 1 2.23 4.38
 8 -4 1 0.49 4.1
 -8 -4 -1 4.38 4.51
 8 -4 1 1.6 5.37
 -8 -4 -2 39.25 5.98
 -8 -4 -2 64.55 7.71
 8 -4 2 41.45 5.46
 8 -4 2 54.74 7.46
 -8 -4 -2 62.22 7.11
 -8 -4 -3 379.29 24.27
 -8 -4 -3 391.27 25.24
 8 -4 3 335.66 22.52
 8 -4 3 409.54 25.42
 -8 -4 -3 376.8 24.29
 -8 -4 -4 12.18 4.43
 8 -4 4 14.34 3.43
 8 -4 4 9.98 3.07
 8 -4 4 14.04 5.16
 -8 -4 -4 12.65 4.23
 -8 -4 -5 8.76 4.25
 8 -4 5 14.69 3.04
 8 -4 5 5.8 2.83
 8 -4 5 7.57 4.85
 -8 -4 -5 6.69 3.84
 -8 -4 -6 37.09 5.23
 -8 -4 -6 35.77 5.66
 8 -4 6 40.46 3.7
 8 -4 6 27.27 3.97
 8 -4 6 28.99 5.46
 -8 -4 -6 27.67 4.06
 -8 -4 -6 34.52 4.61
 -8 -4 -7 27.3 4.34
 8 -4 7 21.28 3.29
 -8 -4 -7 33.55 3.79
 -8 -4 -7 20.74 3.39
 -8 -4 -8 154.45 9.53
 -8 -4 -8 136.07 8.55
 -8 -4 -9 14 2.41
 8 -4 9 14.15 2.55
 8 -3 -16 14.9 2.71
 8 -3 -16 11.69 2.27
 -8 -3 16 15.59 2.62
 8 -3 -15 82.62 7.19
 8 -3 -15 88.31 6.72
 -8 -3 15 69.63 6.67
 -8 -3 15 83.33 6.97
 8 -3 -14 88.48 8.22
 -8 -3 14 74.46 7.81
 8 -3 -14 87.1 7.39
 -8 -3 14 87.38 7.79
 8 -3 -13 20.91 5.44
 8 -3 -13 24 4.59
 8 -3 -13 19.99 3.66
 -8 -3 13 26.44 5.53
 -8 -3 13 23.14 4.77
 8 -3 -12 49.45 5.7
 8 -3 -12 56.16 7.61
 8 -3 -12 48.95 6.24
 -8 -3 12 58.36 7.73
 -8 -3 12 47.6 4.8
 -8 -3 12 50.71 6.62
 -8 -3 11 93.9 9.02
 8 -3 -11 114.18 10.93
 8 -3 -11 114.12 9.39
 8 -3 -11 102.75 9.36
 -8 -3 11 109.09 10.92
 -8 -3 11 97.55 8.26
 -8 -3 11 118.04 10.08
 -8 -3 11 113.63 8.07
 -8 -3 10 20.63 4.83
 8 -3 -10 19.18 6.49
 8 -3 -10 19.06 4.84
 8 -3 -10 20.19 4.86
 -8 -3 10 25.26 6.32
 -8 -3 10 17.4 5.3
 -8 -3 10 18.29 3.72
 -8 -3 10 19.59 3.38
 8 -3 -9 912.7 55.7
 -8 -3 9 883.86 55.07
 8 -3 -9 929.49 54.54
 -8 -3 9 931.42 56.28
 -8 -3 9 931.32 54.1
 -8 -3 9 896.26 53.55
 8 -3 -9 946.19 54.61
 8 -3 -8 246.65 17.61
 -8 -3 8 219.35 16.84
 8 -3 -8 237.07 16.38
 -8 -3 8 239.99 17.8
 8 -3 -8 238.62 16.47
 -8 -3 8 226.05 15.92
 8 -3 -8 235.65 16.19
 -8 -3 8 238.38 15.58
 8 -3 -8 222.97 16.53
 8 -3 -7 4.45 3.98
 8 -3 -7 3.89 3.83
 -8 -3 7 3.58 3.82
 8 -3 -7 7.6 5.4
 -8 -3 7 4.84 4.72
 8 -3 -7 1.5 4.22
 -8 -3 7 4.56 3.35
 -8 -3 7 4.08 3.07
 8 -3 -7 0.97 4.17
 -8 -3 6 63.13 7.22
 8 -3 -6 52.73 7.55
 -8 -3 6 52.83 6.2
 8 -3 -6 61.81 6.6
 -8 -3 6 63.91 7.7
 -8 -3 6 59.91 6.29
 8 -3 -6 59.18 6.94
 -8 -3 6 64.8 6.07
 8 -3 -6 55.39 6.65
 8 -3 -6 54.4 6.68
 -8 -3 5 70.58 7.2
 8 -3 -5 81.1 8.72
 -8 -3 5 78.59 8.07
 -8 -3 5 70.6 7.39
 8 -3 -5 74.63 6.5
 8 -3 -5 72.13 7.38
 -8 -3 5 84.72 8.75
 8 -3 -5 83.01 7.57
 -8 -3 5 76.17 7.11
 8 -3 -5 74.92 7.85
 -8 -3 5 80.69 6.93
 8 -3 -5 81.06 7.78
 -8 -3 4 36.29 5.14
 -8 -3 4 33.95 5.29
 -8 -3 4 30.29 5.48
 8 -3 -4 28.3 6.02
 8 -3 -4 35.73 4.54
 8 -3 -4 30.44 4.96
 8 -3 -4 33.41 5.18
 8 -3 -4 36.84 5.48
 8 -3 -4 32.79 5.59
 -8 -3 3 274.64 18.96
 -8 -3 3 280 19.02
 8 -3 -3 258.53 18.01
 8 -3 -3 289.79 18.04
 8 -3 -3 271.64 18.06
 -8 -3 3 266.73 17.9
 8 -3 -3 275.32 18.66
 -8 -3 3 291.56 17.85
 8 -3 -3 275.35 18.27
 -8 -3 3 266.48 18.64
 -8 -3 2 31.36 5.54
 -8 -3 2 24.43 4.72
 8 -3 -2 23.26 3.98
 -8 -3 2 25.87 4.88
 8 -3 -2 25.04 4.34
 8 -3 -2 23.59 4.43
 -8 -3 2 27.68 4.11
 -8 -3 2 29.42 4.07
 8 -3 -2 28.27 4.77
 8 -3 -2 22.35 5.04
 -8 -3 1 44.63 6.54
 -8 -3 1 46.62 4.98
 -8 -3 1 46.5 6.3
 8 -3 -1 50.33 5.81
 8 -3 -1 48.18 5.83
 -8 -3 1 57.7 7.2
 8 -3 -1 43.64 5.9
 8 -3 -1 40.29 6.12
 -8 -3 0 42.34 5.7
 -8 -3 0 40.95 6.3
 -8 -3 0 40.16 6
 8 -3 0 40.61 5.76
 8 -3 0 45.12 5.65
 -8 -3 0 56.96 5.13
 8 -3 0 51.95 5.96
 -8 -3 -1 125.49 10.29
 -8 -3 -1 120.8 10.7
 -8 -3 -1 125.28 10.93
 8 -3 1 111.07 9.72
 8 -3 1 124.56 9.75
 -8 -3 -1 117.58 10.6
 8 -3 1 107.9 9.45
 -8 -3 -2 231.85 16.08
 -8 -3 -2 223.64 16.28
 -8 -3 -2 226.14 16.31
 8 -3 2 193.04 14.9
 8 -3 2 183.22 14.51
 8 -3 2 230.24 16.22
 8 -3 2 228.92 16.04
 -8 -3 -2 224.33 15.51
 8 -3 2 234.56 15.17
 -8 -3 -3 392.93 24.54
 8 -3 3 323.55 22.13
 8 -3 3 353.63 23.32
 8 -3 3 414.72 24.96
 8 -3 3 372.32 24.39
 -8 -3 -3 385.48 23.7
 -8 -3 -3 391.15 23.97
 8 -3 3 364.1 23.26
 -8 -3 -4 63.58 7.64
 -8 -3 -4 72.38 8.24
 8 -3 4 55.24 6.4
 8 -3 4 54.1 5.26
 8 -3 4 62.01 7.9
 8 -3 4 61.74 7.75
 -8 -3 -4 61.06 6.99
 -8 -3 -4 56.93 6.57
 8 -3 4 64.41 6.78
 -8 -3 -5 155.21 12.71
 -8 -3 -5 153.04 12.94
 8 -3 5 154.97 10.28
 8 -3 5 143.61 11.66
 8 -3 5 139.57 12.42
 -8 -3 -5 155.18 12.16
 -8 -3 -5 159.96 11.67
 8 -3 5 159.66 11.49
 -8 -3 -6 82.42 8.77
 -8 -3 -6 80.78 8.83
 8 -3 6 75.88 7.73
 -8 -3 -6 85.58 8.26
 -8 -3 -6 90.43 7.61
 8 -3 6 90.56 7.81
 -8 -3 -7 26 5.39
 -8 -3 -7 23.87 5.21
 8 -3 7 19.4 4.17
 8 -3 7 20.83 5.06
 -8 -3 -7 21.14 4.84
 -8 -3 -7 24.89 3.56
 8 -3 8 15.44 3.79
 8 -3 8 18.43 4.49
 -8 -3 -8 23.79 4.26
 8 -3 9 7.77 2.93
 8 -3 9 7.52 3.24
 -8 -3 -9 10.18 3.11
 -8 -3 -10 67.96 5.45
 8 -3 10 59.31 4.96
 8 -3 10 51.42 4.96
 -8 -3 -10 65.15 5.11
 8 -2 -17 29.53 3.74
 -8 -2 17 30.47 3.44
 -8 -2 17 24.7 2.98
 8 -2 -17 28.95 3.45
 8 -2 -16 19.63 4.4
 8 -2 -16 22.7 3.26
 -8 -2 16 19.6 4.08
 -8 -2 16 22.19 3.54
 8 -2 -16 20.05 3.92
 8 -2 -15 84.33 8.41
 8 -2 -15 74.91 6.73
 8 -2 -15 62.86 6.07
 -8 -2 15 83.97 7.29
 -8 -2 15 77.82 7.97
 8 -2 -15 85.02 7.58
 8 -2 -14 23.15 6.11
 8 -2 -14 15.48 4.11
 8 -2 -14 17.11 3.98
 -8 -2 14 20.02 5.46
 -8 -2 14 22.71 4.55
 8 -2 -14 17.7 4.94
 -8 -2 13 182.75 14.2
 8 -2 -13 209.67 16.26
 8 -2 -13 208.04 14.53
 -8 -2 13 215.39 16.45
 8 -2 -13 194.75 14.32
 -8 -2 13 225.11 15.36
 8 -2 -13 221.11 15.33
 -8 -2 12 35 5.43
 8 -2 -12 42.85 8.14
 -8 -2 12 42.29 6.22
 8 -2 -12 40.37 5.83
 -8 -2 12 39.23 7.23
 8 -2 -12 47.21 6.75
 -8 -2 11 160.09 13.36
 8 -2 -11 183.89 15.16
 8 -2 -11 177.24 13.17
 -8 -2 11 167.68 11.97
 8 -2 -11 193.22 13.58
 -8 -2 11 189.37 13.83
 -8 -2 11 207.85 15.35
 8 -2 -11 188.63 13.82
 -8 -2 10 102.37 10.15
 -8 -2 10 102.76 9.19
 -8 -2 10 88.25 7.36
 8 -2 -10 89.14 8.27
 8 -2 -10 95.63 8.84
 -8 -2 10 105.13 8.99
 8 -2 -10 84.35 7.96
 -8 -2 10 99.01 7.19
 8 -2 -10 98.3 9.05
 -8 -2 9 165.91 13.51
 8 -2 -9 186.49 13.12
 -8 -2 9 172.5 14.6
 8 -2 -9 181.92 13.45
 -8 -2 9 182.73 12.53
 -8 -2 9 200.57 13.74
 8 -2 -9 180.87 13.32
 -8 -2 9 188.83 12.23
 8 -2 -9 190.5 13.59
 -8 -2 8 702.3 43.59
 -8 -2 8 729.37 43.44
 8 -2 -8 736.53 42.9
 8 -2 -8 715.39 43.19
 -8 -2 8 706.24 42.55
 -8 -2 8 734.69 43.45
 8 -2 -8 713.52 43.33
 -8 -2 8 707.68 42.22
 8 -2 -8 764.96 43.37
 8 -2 -7 7.38 4.13
 -8 -2 7 1.36 3.28
 -8 -2 7 6.48 3.4
 8 -2 -7 4.17 3.05
 8 -2 -7 6.41 3.92
 -8 -2 7 7.1 3.37
 -8 -2 7 5.94 2.78
 -8 -2 7 4.21 2.39
 8 -2 -7 5.94 3.57
 8 -2 -6 245.69 16.95
 -8 -2 6 224.23 16.32
 -8 -2 6 237.67 16.42
 8 -2 -6 231.28 16.2
 8 -2 -6 228.69 15.49
 8 -2 -6 245.59 16.04
 -8 -2 6 242.27 15.61
 -8 -2 6 246.65 16.1
 -8 -2 6 253.1 15.4
 8 -2 -6 229.74 15.96
 8 -2 -5 92.29 8.57
 -8 -2 5 86.37 8.13
 8 -2 -5 87.23 7.26
 -8 -2 5 92.07 8.65
 -8 -2 5 88.22 7.28
 -8 -2 5 89.22 7.79
 8 -2 -5 99.35 8.23
 -8 -2 5 103.5 7.36
 -8 -2 5 89.31 7.99
 8 -2 -5 88.67 7.63
 -8 -2 4 443.4 27.91
 8 -2 -4 474.66 28.28
 -8 -2 4 404.88 27.67
 -8 -2 4 512.18 28.82
 -8 -2 4 472.79 27.21
 8 -2 -4 420.09 26.85
 8 -2 -4 426.98 27.57
 -8 -2 4 485.04 27.08
 8 -2 -4 417.93 27.15
 -8 -2 3 598.16 32.26
 8 -2 -3 562.76 33.24
 -8 -2 3 535.25 33.07
 -8 -2 3 573.49 33.71
 8 -2 -3 543.63 32.34
 -8 -2 3 524.39 32.76
 8 -2 -3 510.88 31.89
 8 -2 -3 505.87 32.62
 8 -2 -3 517.38 32.16
 -8 -2 2 105.36 9.58
 -8 -2 2 130.59 10.7
 -8 -2 2 157.78 11.08
 -8 -2 2 133.42 10.51
 -8 -2 2 145.19 10.12
 8 -2 -2 137.46 9.51
 -8 -2 2 156.52 11.38
 8 -2 -2 146.1 10.01
 8 -2 -2 115.44 9.99
 8 -2 -2 139.41 9.82
 -8 -2 1 52.39 6.32
 -8 -2 1 54.8 5.93
 8 -2 -1 50.8 5.33
 -8 -2 1 56.39 6.46
 -8 -2 1 53.96 6.47
 8 -2 -1 55.5 5.28
 -8 -2 1 71.62 7.18
 -8 -2 1 68 5.47
 8 -2 -1 59.09 5.73
 8 -2 -1 52.09 5.51
 -8 -2 0 30.13 4.84
 -8 -2 0 30.03 5.32
 8 -2 0 31.63 4.41
 -8 -2 0 29.46 5.06
 -8 -2 0 31.08 5.15
 8 -2 0 31.27 4.12
 -8 -2 0 41.01 4.09
 8 -2 0 30.84 4.44
 8 -2 0 30.66 4.45
 8 -2 0 30.09 4.3
 8 -2 0 33.46 5.12
 -8 -2 -1 34.29 5.34
 8 -2 1 34.59 4.91
 -8 -2 -1 39.56 5.48
 8 -2 1 45.78 4.85
 8 -2 1 37.96 4.7
 8 -2 1 40.26 5.63
 -8 -2 -2 209.05 14.84
 -8 -2 -2 190.8 14.76
 -8 -2 -2 224.15 14.86
 -8 -2 -2 206.65 15.03
 8 -2 2 179.03 13.53
 8 -2 2 193.99 13.83
 8 -2 2 199.57 14.43
 8 -2 2 210.07 13.69
 -8 -2 -3 3.59 4.72
 -8 -2 -3 3.02 4.55
 -8 -2 -3 1.69 4.02
 8 -2 3 2.97 3.55
 8 -2 3 1.69 2.8
 8 -2 3 1.81 2.05
 -8 -2 -3 2.8 2.94
 8 -2 3 4.63 4.22
 8 -2 3 0.42 3.23
 -8 -2 -4 1047.12 57.74
 -8 -2 -4 1066.27 58.04
 -8 -2 -4 1033.93 58.2
 8 -2 4 913.89 56.35
 8 -2 4 958.8 56.69
 8 -2 4 906.08 55.76
 8 -2 4 945.38 56.93
 -8 -2 -4 927.04 57.08
 -8 -2 -4 981.43 56.4
 8 -2 4 957.81 56.13
 -8 -2 -5 270.18 19.06
 -8 -2 -5 273.59 19.07
 8 -2 5 261.56 17.99
 8 -2 5 273.21 18.25
 -8 -2 -5 251.16 18.35
 -8 -2 -5 267.47 17.31
 -8 -2 -6 201.9 15
 8 -2 6 187.89 14.25
 8 -2 6 206.93 13.81
 -8 -2 -6 193.36 14.84
 -8 -2 -7 22.44 4.91
 8 -2 7 19.7 4.64
 8 -2 7 15.42 4.92
 -8 -2 -7 19.75 5.57
 -8 -2 -8 146.74 11.79
 -8 -2 -8 145.48 10.96
 8 -2 8 141.67 11.02
 8 -2 8 128.93 11.13
 -8 -2 -8 134.04 11.37
 -8 -2 -9 92.96 8.21
 8 -2 9 69.65 7.15
 8 -2 9 73.83 7.31
 -8 -2 -9 84.51 7.9
 -8 -2 -10 17.64 3.85
 8 -2 10 11.33 2.98
 -8 -2 -10 13.43 3.87
 -8 -2 -11 20.1 3.05
 -8 -2 -11 21.2 3.27
 8 -1 -18 39.99 3.89
 -8 -1 17 50.34 4.64
 8 -1 -17 59.58 5.33
 -8 -1 16 26.96 4.49
 8 -1 -16 18.99 3.23
 8 -1 -16 29.78 3.93
 -8 -1 16 22.64 5.06
 -8 -1 16 24.12 3.68
 8 -1 -16 26.25 4.42
 -8 -1 15 83.46 8.8
 -8 -1 15 59.93 6.34
 -8 -1 15 72.01 7.65
 8 -1 -15 75.58 7.06
 -8 -1 15 83.51 7.12
 8 -1 -15 82.73 7.78
 -8 -1 14 93.19 8.78
 -8 -1 14 113.78 10.16
 -8 -1 14 119.67 11.37
 8 -1 -14 105.46 9.5
 -8 -1 14 113.91 9.4
 8 -1 -14 122.8 9.95
 8 -1 -13 1.73 4.05
 -8 -1 13 8.45 4.61
 -8 -1 13 4.36 3.57
 8 -1 -13 11.49 6.79
 8 -1 -13 3.03 4.52
 -8 -1 13 10.16 6.36
 -8 -1 13 8.3 3.82
 8 -1 -12 88.29 8.33
 -8 -1 12 87.58 8.26
 8 -1 -12 100.62 10.59
 -8 -1 12 87.4 8.88
 8 -1 -12 85.49 8.78
 -8 -1 12 96.25 8.52
 8 -1 -12 78.02 7.42
 8 -1 -11 33.34 4.91
 8 -1 -11 27.08 5.09
 -8 -1 11 28.48 5.17
 8 -1 -11 43.03 7.47
 -8 -1 11 37.35 5.97
 8 -1 -11 28.76 5.93
 -8 -1 11 37.33 5.16
 -8 -1 10 234.05 17.27
 8 -1 -10 281.13 18.82
 -8 -1 10 258.95 17.65
 8 -1 -10 253.61 17.49
 -8 -1 10 263.44 18.96
 -8 -1 10 261.49 17.32
 8 -1 -10 253.83 17.04
 -8 -1 9 702.83 44.46
 8 -1 -9 790.32 45.66
 -8 -1 9 742.6 44.77
 8 -1 -9 694.79 44.32
 -8 -1 9 821.51 46.04
 -8 -1 9 757.64 44.43
 8 -1 -9 724.5 44.28
 8 -1 -9 785.56 44.53
 8 -1 -8 3.39 3.34
 -8 -1 8 -0.17 3.22
 8 -1 -8 1.65 4.28
 -8 -1 8 0.69 3.02
 8 -1 -8 -2.62 4.31
 -8 -1 8 4.63 3.74
 -8 -1 8 2.5 2.58
 -8 -1 8 0.79 1.72
 -8 -1 8 1.88 1.57
 -8 -1 8 0.95 1.48
 8 -1 -8 5.31 3.22
 8 -1 -7 698.79 40.34
 -8 -1 7 597.22 39.37
 8 -1 -7 600.34 38.68
 8 -1 -7 707.23 40.23
 -8 -1 7 668.62 38.68
 -8 -1 7 707.16 40.52
 -8 -1 7 689.4 39.42
 -8 -1 7 647.45 38.65
 -8 -1 7 731.85 38.62
 8 -1 -7 660.14 39.5
 8 -1 -7 686.47 39.33
 8 -1 -7 627.04 38.65
 8 -1 -6 27.91 3.78
 8 -1 -6 29.95 4.48
 8 -1 -6 27.89 3.88
 8 -1 -6 35.82 5.06
 8 -1 -6 32.01 3.88
 -8 -1 6 29.94 3.63
 -8 -1 6 29.02 3.26
 8 -1 -6 36.25 4.57
 8 -1 -6 30.71 3.93
 -8 -1 6 34.02 3.96
 -8 -1 6 30.25 4.78
 -8 -1 6 29.87 3.23
 8 -1 -6 31.37 4.01
 8 -1 -5 394.15 24.25
 -8 -1 5 424.24 23.49
 8 -1 -5 418.42 24.38
 -8 -1 5 403.78 24.74
 8 -1 -5 403.86 24.53
 -8 -1 5 417.11 24.64
 -8 -1 5 368.32 23.18
 8 -1 -5 375.63 23.63
 8 -1 -5 350.32 23.97
 -8 -1 5 398.99 23.73
 -8 -1 5 365.67 23.15
 8 -1 -5 373.75 23.82
 8 -1 -5 378.41 23.36
 8 -1 -5 375.11 23.34
 8 -1 -4 325.85 20.39
 -8 -1 4 342.91 19.36
 8 -1 -4 335.95 20.65
 8 -1 -4 323.1 20.21
 -8 -1 4 295.93 19.9
 -8 -1 4 339.69 20.71
 -8 -1 4 339.45 20.64
 -8 -1 4 329.47 19.35
 8 -1 -4 290.46 19.94
 8 -1 -4 323.21 19.71
 -8 -1 4 331.52 19.74
 -8 -1 4 303.02 19.31
 8 -1 -4 311.03 19.93
 -8 -1 4 280.83 19.22
 8 -1 -4 308.45 19.34
 8 -1 -4 312.1 19.49
 8 -1 -3 117.6 9
 -8 -1 3 120.81 7.81
 -8 -1 3 106.95 7.93
 8 -1 -3 111.27 8.76
 8 -1 -3 119.04 7.89
 -8 -1 3 111.36 8.89
 -8 -1 3 122.21 8.86
 8 -1 -3 100.23 8.13
 -8 -1 3 112.99 8.89
 -8 -1 3 126.74 9.26
 -8 -1 3 124.95 8.02
 8 -1 -3 110.15 8.26
 -8 -1 3 103.96 7.96
 8 -1 -3 104.72 7.93
 8 -1 -3 105.56 8.27
 8 -1 -2 555.59 31.69
 -8 -1 2 558.59 33.03
 8 -1 -2 573.15 32.66
 8 -1 -2 513.99 31.75
 -8 -1 2 571.42 32.84
 -8 -1 2 494.15 31.83
 8 -1 -2 539.4 31.41
 -8 -1 2 589.51 33.14
 -8 -1 2 637.9 32.08
 8 -1 -2 525.52 31.96
 8 -1 -2 520.61 32.39
 8 -1 -2 511.63 31.71
 8 -1 -2 504.77 32
 8 -1 -2 536.08 33.13
 8 -1 -1 74.95 5.8
 -8 -1 1 76.4 6.7
 8 -1 -1 74.54 6.03
 -8 -1 1 82.32 6.99
 -8 -1 1 68.22 6.23
 8 -1 -1 73.56 6.03
 8 -1 -1 69.39 5.54
 -8 -1 1 83.83 6.96
 8 -1 -1 73.39 6.04
 8 -1 -1 73.44 6.62
 8 -1 -1 78.29 5.97
 8 -1 0 48.46 4.57
 8 -1 0 47.07 4.91
 -8 -1 0 57.89 5.58
 8 -1 0 48.94 4.55
 -8 -1 0 58.31 6.08
 8 -1 0 48.39 4.42
 -8 -1 0 43.37 4.83
 -8 -1 0 60.5 5.54
 8 -1 0 48.72 4.74
 8 -1 0 46.75 5.23
 8 -1 0 49.15 4.59
 8 -1 1 6.04 1.92
 8 -1 1 7.53 1.82
 8 -1 1 7.94 3.04
 -8 -1 -1 6.15 2.87
 -8 -1 -1 8.68 3.8
 8 -1 1 3.74 2.45
 -8 -1 -1 5.23 3.06
 8 -1 1 7.05 2.53
 8 -1 1 9.12 2.52
 8 -1 1 6.02 3.12
 -8 -1 -2 575.51 33.03
 8 -1 2 500.58 31.97
 -8 -1 -2 583.42 32.39
 8 -1 2 503.63 31
 -8 -1 -2 586.42 33.05
 8 -1 2 521.59 30.93
 -8 -1 -2 532.03 32.06
 8 -1 2 523.02 31.26
 8 -1 2 511.09 31.96
 8 -1 2 522.61 31.25
 8 -1 3 183.27 12.13
 -8 -1 -3 177.1 13.52
 -8 -1 -3 210.95 14.15
 8 -1 3 172.79 13.14
 -8 -1 -3 211.63 14.11
 8 -1 3 187.54 12.75
 8 -1 3 175.92 11.98
 -8 -1 -3 188.08 13.39
 8 -1 3 185.74 12.4
 8 -1 3 191.8 13.13
 8 -1 3 190.22 12.31
 8 -1 4 403.17 27.13
 -8 -1 -4 474.79 27.92
 8 -1 4 407.58 25.94
 8 -1 4 432.53 26.5
 8 -1 4 401.28 25.8
 -8 -1 -4 449.3 27.44
 -8 -1 -4 478.16 27.89
 8 -1 4 429.6 26.3
 8 -1 4 419.18 26.65
 8 -1 4 468.03 26.12
 -8 -1 -5 607.03 35.99
 -8 -1 -5 638.19 36.13
 -8 -1 -5 609.59 36.18
 8 -1 5 488.34 33.75
 8 -1 5 585.35 34.78
 8 -1 5 574.04 34.83
 8 -1 5 568.95 34.73
 8 -1 5 663.9 34.55
 -8 -1 -6 54.71 7.74
 -8 -1 -6 69.89 6.95
 -8 -1 -6 62.65 8.03
 8 -1 6 55.78 6.64
 8 -1 6 52.05 5.82
 -8 -1 -7 21.5 6.1
 -8 -1 -7 18.95 3.97
 8 -1 7 19.04 4.09
 -8 -1 -8 191.33 14.33
 8 -1 8 173.74 13.35
 -8 -1 -8 174.65 14.09
 -8 -1 -9 142.99 11.08
 8 -1 9 137.69 10.55
 8 -1 9 119.58 9.93
 -8 -1 -9 121.85 11.14
 -8 -1 -10 107.79 8.22
 8 -1 10 97.71 7.78
 -8 -1 -11 44.86 4.53
 8 -1 11 43.94 4.63
 8 -1 12 44.08 3.88
 -8 -1 -12 55.98 4.43
 8 0 -18 2.99 2.07
 -8 0 18 3.97 2.1
 -8 0 17 3.43 1.94
 8 0 -17 -0.31 3.53
 -8 0 17 2.59 2.61
 8 0 -17 4.15 2.57
 8 0 -17 3.18 2.38
 -8 0 16 161 12.3
 8 0 -16 167.37 13.59
 -8 0 16 201.43 13.24
 8 0 -16 196.41 13.01
 -8 0 16 176.88 11.98
 8 0 -16 195.42 12.67
 -8 0 15 153.22 11.91
 8 0 -15 189.51 14.22
 -8 0 15 169.93 12.6
 -8 0 15 157.39 11.46
 8 0 -15 165.27 12.65
 8 0 -14 34.66 4.72
 8 0 -14 35.78 4.75
 -8 0 14 26.92 3.66
 8 0 -14 38.82 7.68
 -8 0 14 39.58 5.37
 -8 0 14 43.99 6.09
 8 0 -14 32.99 6.31
 -8 0 14 35.95 4.64
 8 0 -13 228.33 15.65
 -8 0 13 228.8 16.36
 8 0 -13 262.85 18.27
 -8 0 13 247.15 16.9
 -8 0 13 215.57 15.19
 8 0 -13 255.2 17.08
 -8 0 13 233.22 15.9
 8 0 -13 232.99 16
 8 0 -12 102.92 8.46
 8 0 -12 88.52 7.9
 -8 0 12 103.02 9.07
 8 0 -12 112.86 10.7
 -8 0 12 108.76 9.47
 -8 0 12 101.97 8.12
 8 0 -12 108.48 9.9
 -8 0 12 110.56 8.64
 8 0 -12 101.62 8.93
 8 0 -11 303.36 19.42
 8 0 -11 267.28 18.96
 -8 0 11 278.62 19.88
 8 0 -11 327.71 21.58
 -8 0 11 308.09 19.34
 -8 0 11 331.69 20.57
 8 0 -11 304.99 20.29
 -8 0 11 327 19.78
 8 0 -11 311.45 19.97
 8 0 -10 -1.76 4.22
 8 0 -10 -2.3 2.91
 8 0 -10 -4.86 3.88
 8 0 -10 -0.44 4.85
 -8 0 10 1.56 3.43
 8 0 -10 0.74 2.49
 -8 0 10 1.71 2.16
 -8 0 10 2.68 2.42
 -8 0 10 5.08 3.35
 -8 0 10 4.04 2.51
 8 0 -9 65.29 6.27
 -8 0 9 62.63 6.48
 8 0 -9 67.5 7.45
 -8 0 9 67.77 6.5
 8 0 -9 74.17 5.97
 -8 0 9 69.86 5.71
 -8 0 9 71.56 6.11
 -8 0 9 65.06 5.94
 8 0 -9 72.23 7.09
 8 0 -9 72.12 5.71
 8 0 -8 48.09 5.57
 8 0 -8 57.06 6.4
 -8 0 8 56.58 5.58
 8 0 -8 64.43 5.38
 -8 0 8 56.85 4.98
 -8 0 8 58.62 5.39
 8 0 -8 60.67 6.23
 -8 0 8 56.44 5.12
 8 0 -8 58.61 6.21
 8 0 -8 59.14 5.21
 8 0 -7 2.06 2.37
 8 0 -7 -0.95 3.48
 8 0 -7 -0.62 3.23
 -8 0 7 5.27 2.87
 8 0 -7 4.03 3.68
 8 0 -7 4 2.77
 -8 0 7 2.52 2.24
 -8 0 7 2.44 2.41
 -8 0 7 3.43 2.18
 8 0 -7 2.37 3.28
 -8 0 7 4.9 3.1
 -8 0 7 4.13 2.04
 8 0 -7 4.37 2.33
 8 0 -6 510.71 33.08
 8 0 -6 555.43 33.85
 -8 0 6 515.07 33.43
 -8 0 6 589.82 34.08
 -8 0 6 525.01 33.35
 8 0 -6 580.91 33.26
 -8 0 6 496.25 33.15
 -8 0 6 656.14 32.8
 -8 0 6 528.63 33.07
 8 0 -6 524.2 34.53
 -8 0 6 583.37 34.22
 8 0 -6 548.86 33.48
 8 0 -6 648.05 34.91
 8 0 -6 509.05 34.13
 -8 0 6 647.24 33.55
 8 0 -6 575.72 33.39
 8 0 -6 553.56 33.66
 8 0 -6 606.75 33.2
 8 0 -5 184.23 12.52
 8 0 -5 160.77 11.49
 -8 0 5 168.65 11.65
 -8 0 5 149.77 11.25
 -8 0 5 186.32 11.77
 -8 0 5 153.49 10.95
 8 0 -5 172.79 11.28
 -8 0 5 192.15 10.88
 -8 0 5 138.56 10.92
 8 0 -5 181.84 12.36
 8 0 -5 146.17 11.87
 -8 0 5 171.4 11.86
 8 0 -5 156.44 12.14
 8 0 -5 164.56 11.34
 -8 0 5 168.12 11.13
 8 0 -5 177.89 11.28
 -8 0 5 194.07 11.23
 8 0 -5 171.68 11.14
 -8 0 4 202.39 13.34
 8 0 -4 177.01 12.58
 8 0 -4 202.29 13.96
 8 0 -4 190.8 12.9
 -8 0 4 210.86 13.14
 -8 0 4 187.24 12.94
 8 0 -4 183.28 12.65
 8 0 -4 216.49 13.98
 -8 0 4 222.8 12.51
 8 0 -4 187.85 13.72
 -8 0 4 210.09 13.3
 8 0 -4 188.36 12.71
 8 0 -4 194.57 14.04
 8 0 -4 199.84 12.83
 -8 0 4 206.04 12.75
 8 0 -4 189.57 13.04
 -8 0 4 214.19 12.74
 -8 0 4 167.49 12.39
 8 0 -4 201.13 12.72
 -8 0 3 67.38 5.9
 -8 0 3 75.9 5.77
 -8 0 3 58.34 5.58
 8 0 -3 64.53 5.74
 8 0 -3 76.83 6.68
 -8 0 3 70.83 5.31
 8 0 -3 71.25 6.49
 8 0 -3 64.52 5.45
 -8 0 3 70.63 5.55
 8 0 -3 55.08 5.75
 -8 0 3 71.24 5.61
 8 0 -3 62.06 5.54
 -8 0 2 93.62 7.47
 -8 0 2 74.33 6.79
 8 0 -2 96.37 8.11
 -8 0 2 99.44 7.36
 8 0 -2 88.4 6.68
 -8 0 2 101.26 7.2
 -8 0 2 91.81 6.82
 -8 0 2 105.36 6.67
 8 0 -2 84.68 7.21
 -8 0 2 88.88 7.02
 -8 0 2 101.61 7.75
 8 0 -1 264.24 18.42
 8 0 -1 272.11 17.16
 -8 0 1 279.64 17.35
 8 0 -1 315.65 17.36
 -8 0 1 275.06 17.02
 -8 0 1 301.85 18.2
 8 0 -1 273.57 17.7
 -8 0 1 287.88 16.81
 8 0 -1 259.86 16.62
 8 0 -1 246.46 17.11
 -8 0 1 271.85 17.37
 -8 0 1 265.91 17.26
 -8 0 1 280.7 17.91
 8 0 -1 258.83 17.01
 8 0 0 362.61 22.61
 8 0 0 383.14 22.57
 -8 0 0 347.21 22.38
 8 0 0 371.5 22.03
 -8 0 0 405.47 23.44
 8 0 0 367.48 23
 -8 0 0 357.32 22.35
 -8 0 0 378.15 22.21
 8 0 0 356.46 22.48
 -8 0 0 363.17 22.75
 -8 0 0 380.52 23.26
 8 0 0 353.88 22.28
 8 0 0 367.25 23.99
 8 0 1 10.03 3.09
 8 0 1 10.47 3.21
 8 0 1 12.1 2.99
 8 0 1 12.6 2.49
 8 0 1 14.07 2.81
 8 0 1 11.94 3.17
 -8 0 -1 10.18 3.21
 8 0 1 11.65 2.5
 -8 0 -1 13.15 3.06
 -8 0 -1 12.15 3.3
 8 0 2 808 47.87
 -8 0 -2 870.41 48.32
 8 0 2 785.14 47.2
 -8 0 -2 846.18 47.66
 -8 0 -2 841.8 47.14
 8 0 2 782.95 47.3
 8 0 2 782.08 47.31
 -8 0 -3 47.23 4.71
 -8 0 -3 46.75 5.62
 -8 0 -3 42.31 5.25
 8 0 3 43.18 4.28
 8 0 3 41.46 4.83
 8 0 3 46.99 4.53
 -8 0 -3 43.16 5.45
 -8 0 -3 41.85 4.65
 -8 0 -4 269.64 18.3
 -8 0 -4 287.92 19.09
 8 0 4 292.04 18.18
 -8 0 -4 292.78 18.95
 8 0 4 302.52 17.91
 8 0 4 274.43 18.05
 8 0 4 293.05 18.1
 -8 0 -4 309.21 19.35
 -8 0 -4 273.49 18.28
 8 0 4 290.44 18.56
 -8 0 -5 525.75 35.4
 -8 0 -5 669.59 37.12
 -8 0 -5 563.31 35.85
 8 0 5 548.71 36.29
 -8 0 -5 603.19 35.94
 8 0 5 633.44 35.51
 8 0 5 593.44 34.98
 8 0 5 592.95 35.05
 -8 0 -5 625.1 36.74
 -8 0 -5 526.66 35.37
 8 0 5 640.73 35.9
 8 0 5 625.17 35.35
 -8 0 -6 217.87 17.22
 8 0 6 272.95 17.27
 -8 0 -6 288.38 18.98
 8 0 6 263.2 18.37
 8 0 6 260.36 16.69
 8 0 6 250.02 16.94
 -8 0 -6 270.2 18.67
 8 0 6 292.79 17.8
 8 0 7 54.1 5.73
 -8 0 -7 43.04 6.38
 -8 0 -7 47.08 7.2
 8 0 7 55.62 4.96
 8 0 7 55.48 5.36
 8 0 7 55.88 6.74
 8 0 7 58.5 6.35
 -8 0 -8 2.91 4.53
 8 0 8 3.12 2.54
 8 0 8 -1.58 3.74
 8 0 8 3.84 3.81
 -8 0 -9 13.82 4.6
 8 0 9 15.92 4.15
 8 0 9 10.62 3.11
 -8 0 -10 201.59 14.22
 8 0 10 227.25 14.59
 -8 0 -10 209.42 15.22
 8 0 11 11.52 2.72
 -8 0 -11 12.24 3.81
 -8 0 -12 43.05 4.06
 -8 1 18 71.18 5.57
 8 1 -17 52.44 5.16
 -8 1 17 49.69 4.64
 8 1 -17 41.42 5.12
 -8 1 17 50.55 4.6
 -8 1 17 63.46 5.95
 -8 1 16 27.01 3.94
 8 1 -16 11.2 4.29
 -8 1 16 20.19 3.61
 8 1 -16 19.97 4.76
 -8 1 15 72.56 7.02
 8 1 -15 61.37 7.65
 -8 1 15 77.73 7.11
 -8 1 15 69.76 5.96
 8 1 -15 89.94 8.27
 8 1 -15 64.23 6.63
 8 1 -14 95.74 8.22
 -8 1 14 110.75 9.5
 8 1 -14 116.86 10.64
 -8 1 14 108.51 9.36
 -8 1 14 120.38 8.83
 8 1 -14 125.25 10.53
 8 1 -14 120.12 9.51
 8 1 -13 4.28 4.54
 8 1 -13 13.14 5.33
 8 1 -13 4.33 3.67
 -8 1 13 6.63 4.1
 -8 1 13 6.82 3.46
 -8 1 13 7.22 3.05
 -8 1 12 93.41 7.12
 8 1 -12 93.34 8.08
 -8 1 12 85.81 8.32
 8 1 -12 88.63 9.21
 -8 1 12 84.39 8.09
 -8 1 12 93.75 7.79
 8 1 -12 91.77 8.89
 8 1 -11 50.59 6.89
 8 1 -11 41.53 5.75
 8 1 -11 38.31 6.44
 -8 1 11 37.52 5.06
 -8 1 11 43.84 5.04
 -8 1 11 35.38 5.33
 8 1 -11 59.03 7.28
 -8 1 11 45.53 4.61
 -8 1 11 37.21 5.13
 8 1 -10 227.65 18.02
 -8 1 10 242.44 17.71
 8 1 -10 286.06 17.52
 8 1 -10 244.66 17.99
 -8 1 10 240.04 17.29
 -8 1 10 303.48 17.14
 -8 1 10 289.06 17.55
 8 1 -10 267.47 18.2
 -8 1 10 244.49 17.27
 8 1 -10 312.58 18.49
 8 1 -9 693.7 46.37
 8 1 -9 830.01 46.14
 -8 1 9 761.85 46.35
 8 1 -9 699.02 46.47
 -8 1 9 722.44 46.06
 -8 1 9 939.21 46.17
 -8 1 9 857.8 46.37
 8 1 -9 763.16 46.45
 -8 1 9 725.71 46.02
 8 1 -9 875.02 46.89
 8 1 -8 -2.26 4.96
 8 1 -8 12.04 4.59
 8 1 -8 8.84 4.09
 -8 1 8 2.88 2.78
 8 1 -8 5.49 3.19
 -8 1 8 1.19 2.02
 -8 1 8 2.31 2.53
 -8 1 8 2.58 2.63
 8 1 -8 16.74 4.42
 -8 1 8 2.5 2.36
 8 1 -7 619.29 40.35
 8 1 -7 760.3 40.47
 -8 1 7 834.06 40.48
 8 1 -7 651.96 40.41
 -8 1 7 655.02 40.32
 8 1 -7 702.71 40.51
 -8 1 7 611.14 40.02
 8 1 -6 33.81 4.85
 -8 1 6 29.99 3.75
 -8 1 6 33.34 3.58
 -8 1 6 38.46 3.92
 8 1 -6 35.05 4.36
 8 1 -6 32.91 3.87
 8 1 -6 31.75 4.77
 8 1 -5 392.48 23.38
 -8 1 5 363.72 23.48
 -8 1 5 356.31 23.3
 -8 1 5 410.29 24.38
 -8 1 5 407.9 23.33
 -8 1 5 392.54 24.47
 -8 1 5 371.85 23.35
 8 1 -5 328.07 24.92
 8 1 -5 367.45 23.22
 8 1 -5 422.84 25.1
 8 1 -5 385.31 24.73
 8 1 -5 438.31 24.21
 8 1 -5 411.1 23.86
 -8 1 4 325.95 19.92
 8 1 -4 322.84 19.5
 -8 1 4 335.69 20.44
 -8 1 4 277.76 19.3
 -8 1 4 316.84 20.6
 8 1 -4 288.44 21.31
 -8 1 4 289.17 19.44
 8 1 -4 362.98 21.31
 8 1 -4 303.6 19.28
 8 1 -4 340.09 20.97
 8 1 -4 364.1 20.41
 8 1 -4 325.93 19.9
 8 1 -4 364.49 21.24
 -8 1 3 112.21 8.36
 8 1 -3 104.39 7.99
 -8 1 3 127.53 8.85
 -8 1 3 104.73 7.89
 8 1 -3 127.31 8.48
 8 1 -3 106.99 9.78
 -8 1 3 113.44 8
 8 1 -3 124.09 9.32
 -8 1 3 97.04 7.91
 8 1 -3 105.22 8.9
 -8 1 3 122.69 8.33
 8 1 -3 112.17 8.47
 8 1 -3 109.83 8.29
 -8 1 3 123.66 9.17
 -8 1 2 541.02 32.94
 -8 1 2 581.79 33.3
 8 1 -2 497.26 32.02
 -8 1 2 521.48 32.22
 8 1 -2 526.97 33.84
 8 1 -2 564.69 32.49
 8 1 -2 579.82 33.91
 8 1 -2 576.11 33.16
 -8 1 2 563.07 32.68
 -8 1 2 483.56 32.25
 8 1 -2 545.44 32.45
 -8 1 2 613.53 32.87
 8 1 -2 619.74 32.6
 8 1 -1 76.13 7.04
 8 1 -1 80.05 7.53
 -8 1 1 91.17 6.44
 8 1 -1 69.27 6.16
 8 1 -1 74.48 6.77
 -8 1 1 73.11 6.36
 -8 1 1 73.92 6.06
 8 1 -1 74.94 6.12
 8 1 -1 80.56 6.36
 -8 1 0 55.12 5.32
 8 1 0 43.17 4.77
 -8 1 0 50.01 4.67
 -8 1 0 50.49 5.14
 8 1 0 47.61 4.89
 8 1 1 4.43 2.28
 8 1 1 2.79 2.75
 8 1 1 6.74 3.07
 -8 1 -1 9.73 3.18
 -8 1 -1 7.66 3.02
 -8 1 -1 4.87 2.73
 -8 1 -1 10.08 3.1
 8 1 2 551.33 33.47
 -8 1 -2 577.87 33.41
 -8 1 -2 556.03 33.43
 8 1 2 539.51 32.78
 8 1 3 184.82 13.44
 -8 1 -3 192.66 13.54
 8 1 3 207.02 13
 -8 1 -3 205.71 13.61
 8 1 3 172.45 12.49
 8 1 4 453.83 28.48
 8 1 4 465.96 27.76
 -8 1 -4 446.12 28.42
 8 1 4 442.88 27.73
 -8 1 -4 469.49 28.15
 -8 1 -5 683.3 36.88
 8 1 5 560.93 36.69
 8 1 5 594.7 35.97
 8 1 5 580.04 35.93
 8 1 5 620.6 36.04
 -8 1 -5 572.67 36.29
 -8 1 -6 73.16 7.65
 -8 1 -6 69.15 7.69
 8 1 6 59.53 7.19
 8 1 6 68 6.14
 8 1 6 64.36 6.38
 -8 1 -6 56.81 7.81
 -8 1 -6 59.62 6.87
 -8 1 -7 22.66 5.81
 8 1 7 16.55 3.62
 -8 1 -7 18.09 5.09
 8 1 7 18.4 4.29
 -8 1 -7 20.81 6.54
 -8 1 -7 21.18 5.13
 -8 1 -7 25.19 4.57
 -8 1 -8 153.81 13.68
 -8 1 -8 171.24 13.21
 8 1 8 185.33 13.19
 -8 1 -8 212.85 13.94
 8 1 8 180.66 12.5
 8 1 8 189.05 12.8
 -8 1 -8 187.46 14.61
 8 1 8 167.46 13.01
 8 1 8 197.52 12.51
 -8 1 -8 154.74 12.43
 -8 1 -9 120.56 9.86
 -8 1 -9 133.75 11.48
 -8 1 -9 127.44 10.45
 8 1 9 141.7 9.58
 8 1 9 130.05 9.62
 8 1 9 137.91 10.13
 8 1 9 139.54 10.31
 -8 1 -9 116.68 11.07
 -8 1 -10 98.26 8.05
 8 1 10 102.51 7.33
 8 1 10 96.05 7.6
 -8 1 -10 96.06 8.8
 8 1 11 41.9 3.78
 -8 1 -11 42.83 4.8
 -8 2 17 24.43 3
 8 2 -17 29.36 3.45
 -8 2 17 23.68 3.24
 8 2 -16 15.01 3.31
 -8 2 16 20.68 3.47
 8 2 -16 12.54 3.15
 -8 2 16 16.97 2.58
 8 2 -16 18.83 4.13
 8 2 -15 69.6 5.76
 8 2 -15 61.81 6.55
 -8 2 15 73.82 6.78
 -8 2 15 57.39 5.68
 -8 2 15 79.08 6.17
 8 2 -15 82.83 6.98
 8 2 -14 21.54 5.24
 8 2 -14 18.7 4.14
 -8 2 14 20.54 2.92
 8 2 -14 15.62 4.34
 -8 2 14 17.38 3.37
 -8 2 14 20.47 3.65
 8 2 -14 27.08 6.08
 -8 2 14 17.76 3.92
 8 2 -13 237.1 15.09
 8 2 -13 201.61 15.3
 -8 2 13 188.55 14.45
 -8 2 13 258.71 14.59
 -8 2 13 184.75 15.03
 8 2 -13 212.32 15.92
 -8 2 13 230.96 15.09
 -8 2 13 210.48 14.99
 8 2 -13 252.42 16.16
 8 2 -12 35.48 7.6
 8 2 -12 46.92 6.91
 8 2 -12 49.36 6.36
 -8 2 12 38.44 5.47
 -8 2 12 37.23 4.56
 8 2 -12 39.28 5.51
 -8 2 12 44.75 5.19
 -8 2 12 37.92 5.39
 8 2 -12 35.31 7.22
 -8 2 12 38.72 5.1
 8 2 -11 165.3 14.31
 -8 2 11 205.2 13.73
 8 2 -11 173.51 13.35
 -8 2 11 161.74 13.18
 -8 2 11 220.18 13.69
 8 2 -11 183.5 14.21
 -8 2 11 171.88 13
 8 2 -11 241.8 14.99
 8 2 -10 89.27 9.52
 -8 2 10 93.23 8.24
 -8 2 10 88.98 8.06
 -8 2 10 102.37 8.31
 8 2 -10 97.89 9.39
 -8 2 10 87.2 7.76
 8 2 -9 183.56 13.53
 -8 2 9 184.95 12.65
 8 2 -9 183.25 13.04
 -8 2 9 161.58 12.21
 -8 2 9 175.15 12.17
 8 2 -8 717.95 43.47
 -8 2 8 740.29 43.32
 -8 2 8 858.22 43.72
 8 2 -8 717.96 43.31
 -8 2 8 693.59 42.94
 8 2 -8 900.5 44.41
 -8 2 8 614.99 42.81
 8 2 -7 1.59 4.22
 -8 2 7 3.52 2.48
 -8 2 7 8.35 2.76
 8 2 -7 2.7 3.84
 -8 2 7 5.92 2.12
 8 2 -6 222.21 15.37
 -8 2 6 234.93 15.24
 -8 2 6 262 15.59
 8 2 -6 235.3 15.32
 -8 2 6 209.68 14.82
 8 2 -5 75.86 7.01
 -8 2 5 87.79 6.84
 -8 2 5 97.38 7.26
 8 2 -4 529.61 29.4
 8 2 -4 440.02 30.15
 -8 2 4 429.44 29.12
 -8 2 4 537.18 29.83
 8 2 -4 492.33 29.51
 -8 2 4 526.6 29.45
 8 2 -3 569.08 32.3
 -8 2 3 603.36 32.52
 -8 2 3 467.2 32.13
 8 2 -3 523.64 33.32
 -8 2 3 594.89 32.85
 8 2 -3 544.08 32.45
 8 2 -2 144.92 9.7
 8 2 -2 156.13 10.29
 -8 2 2 136.81 9.8
 -8 2 2 151.56 10.17
 8 2 -2 131.42 9.73
 8 2 -1 49.32 4.9
 8 2 -1 67.21 5.72
 -8 2 1 57.04 5.21
 -8 2 1 62.78 5.51
 -8 2 1 70.3 6.13
 8 2 -1 69.27 5.87
 8 2 0 33.82 4.14
 -8 2 0 42.67 4.66
 -8 2 0 28.11 3.82
 -8 2 0 27.77 4.18
 8 2 0 36.12 4.25
 -8 2 -1 43.09 5.06
 8 2 1 35.06 4.27
 -8 2 -1 43.64 5.15
 8 2 1 39.19 4.39
 -8 2 -2 206.56 13.47
 8 2 2 218.51 13.65
 -8 2 -2 182.24 13.29
 8 2 2 172.85 12.38
 8 2 3 6.95 3.64
 -8 2 -3 3.05 3.58
 -8 2 -3 3.47 4.09
 8 2 3 2.77 3.01
 8 2 4 919.96 53.95
 -8 2 -4 868.04 53.76
 8 2 4 906.48 53.33
 -8 2 -4 971.32 54.34
 8 2 5 262.88 17.87
 8 2 5 294.22 17.57
 8 2 5 240.69 17
 -8 2 -5 255.67 18.23
 -8 2 -5 280.71 18.17
 8 2 5 255.18 17.51
 8 2 6 158.22 13.1
 8 2 6 183.26 12.98
 -8 2 -6 161.23 13.78
 -8 2 -6 195.4 13.9
 8 2 6 192.75 13.37
 -8 2 -7 27.2 6.21
 -8 2 -7 18.87 4.25
 -8 2 -7 19.18 5.72
 8 2 7 19.32 4.23
 8 2 7 20.66 4.08
 -8 2 -7 18.13 5.77
 -8 2 -7 15.58 5.2
 8 2 7 20.82 4.35
 -8 2 -8 137.86 11.82
 -8 2 -8 103.45 10.51
 8 2 8 136.51 9.95
 -8 2 -8 113.54 10.95
 8 2 8 136.26 9.9
 8 2 8 143.64 10.22
 -8 2 -8 155.8 11.01
 -8 2 -9 71.15 8.36
 8 2 9 86.54 6.83
 8 2 9 92.83 6.37
 -8 2 -9 85.18 7.54
 -8 2 -9 85.79 8.24
 8 2 9 82.99 6.88
 -8 2 -9 72.03 7.83
 8 2 9 76.42 6.46
 8 2 9 81.21 6.92
 -8 2 -9 65.46 7.32
 8 2 10 17.27 2.26
 8 2 10 19.89 2.9
 -8 2 -10 19.36 3.6
 -8 2 -10 20.6 4.36
 8 2 11 21.14 2.36
 -8 2 -11 17.73 3.09
 -8 2 -11 12.02 2.41
 8 3 -16 9.84 2.54
 -8 3 16 14.98 2.08
 8 3 -16 17.85 2.98
 -8 3 15 87.57 6.51
 8 3 -15 76.61 6.14
 -8 3 15 77.83 5.71
 8 3 -15 90.63 7.1
 8 3 -15 89.41 7.08
 8 3 -14 95.33 7.39
 -8 3 14 86.19 7.6
 -8 3 14 91.53 6.8
 -8 3 14 91.95 7.33
 8 3 -14 93.88 8.04
 -8 3 14 75.16 6.89
 8 3 -14 100.62 8.38
 8 3 -13 12.52 5.73
 8 3 -13 34.43 5.9
 8 3 -13 41.29 5.35
 -8 3 13 23.88 4.32
 -8 3 13 25.9 4.27
 8 3 -13 25.56 5.71
 -8 3 13 24.73 3.85
 8 3 -12 38.81 7.16
 -8 3 12 54.51 5.94
 -8 3 12 40.53 4.99
 8 3 -12 50.38 6.9
 -8 3 12 47.54 5.18
 8 3 -11 114.22 9.86
 -8 3 11 107.22 8.54
 -8 3 11 85.68 7.67
 8 3 -11 103.32 9.21
 -8 3 11 89.81 7.81
 8 3 -10 20.87 6.01
 -8 3 10 20.77 4.06
 -8 3 10 24.14 4.26
 8 3 -10 17.32 5.08
 -8 3 10 17.28 3.36
 8 3 -9 862.31 53.15
 -8 3 9 892.03 53.12
 8 3 -9 914.16 53.14
 -8 3 9 834.63 52.62
 8 3 -8 235.09 15.88
 -8 3 8 237.08 15.38
 8 3 -8 218.35 15.37
 -8 3 8 200.52 14.7
 8 3 -7 1.91 4.22
 -8 3 7 4.04 2.44
 -8 3 7 -0.16 2.75
 8 3 -7 2.78 3.57
 8 3 -6 50.07 6.09
 -8 3 6 65.03 5.76
 -8 3 6 71.4 6.21
 -8 3 5 84.38 7.08
 8 3 -5 94.33 7.8
 -8 3 4 35.03 4.06
 -8 3 4 41.27 4.46
 8 3 -4 39.68 4.8
 8 3 -3 317.33 17.81
 -8 3 3 306.81 17.93
 -8 3 3 296.63 18.03
 8 3 -3 270.79 17.58
 8 3 -2 29.09 3.84
 -8 3 2 30.99 3.69
 -8 3 2 24.18 3.51
 8 3 -1 50.13 5.1
 -8 3 1 42.87 4.46
 -8 3 1 44.81 4.6
 -8 3 1 49.96 5.48
 -8 3 0 31.94 3.83
 8 3 0 39.16 4.46
 -8 3 0 46.78 5.29
 -8 3 0 41.81 5.03
 8 3 0 49.54 4.85
 -8 3 -1 123.43 9.04
 -8 3 -1 104.52 8.82
 8 3 1 108.17 8.18
 8 3 2 234.24 14.98
 -8 3 -2 213.83 14.64
 -8 3 -2 245.18 15.31
 8 3 3 356.18 22.6
 8 3 3 363.95 22.11
 -8 3 -3 372.59 23.02
 -8 3 -3 328.39 22.32
 8 3 4 51.02 5.74
 8 3 4 53.1 5.42
 -8 3 -4 61.78 6.67
 -8 3 -4 44 5.47
 8 3 5 128.1 10.39
 8 3 5 159.16 10.72
 8 3 5 134.54 10.08
 -8 3 -5 131.9 11.12
 8 3 5 154.31 10.77
 8 3 6 64.7 6.48
 8 3 6 80.58 6.88
 8 3 6 81.31 7.09
 -8 3 -6 65.46 7.72
 8 3 6 76.24 6.91
 -8 3 -7 24.23 5.55
 -8 3 -7 19.28 5.94
 8 3 7 18.49 3.64
 8 3 7 26.65 4.13
 -8 3 -7 18.35 4.75
 8 3 7 20.58 3.59
 -8 3 -8 24.23 5.58
 -8 3 -8 14.28 5.24
 8 3 8 13.32 3.3
 8 3 8 19.39 3.39
 -8 3 -8 15.83 4.21
 -8 3 -8 17.67 4.9
 -8 3 -9 13.05 4.5
 8 3 9 11.81 2.31
 -8 3 -9 10.68 4.12
 8 3 9 9.82 2.5
 -8 3 -9 6.58 3.02
 -8 3 -9 14.04 4.3
 -8 3 -9 8.69 3.89
 8 3 10 74.82 4.99
 -8 3 -10 52.71 5.83
 8 3 10 70.58 5.36
 8 3 10 71.19 5.04
 -8 3 -10 71 5.67
 8 4 -15 8.54 2.22
 -8 4 15 8.68 1.79
 -8 4 15 11.04 1.79
 8 4 -14 39.2 4.13
 -8 4 14 39.55 4.03
 -8 4 14 49.51 3.83
 8 4 -14 38.92 4.12
 8 4 -14 41.17 4.81
 8 4 -14 38.71 3.54
 -8 4 13 8.79 2.83
 8 4 -13 9.98 3.71
 -8 4 13 5.95 2.62
 -8 4 13 13.06 2.88
 8 4 -13 15.06 3.25
 8 4 -12 62.63 6.98
 8 4 -12 108.76 7.67
 -8 4 12 70.2 6.29
 -8 4 12 77.69 6.52
 8 4 -12 81.66 6.59
 -8 4 12 54.87 5.47
 8 4 -12 91.31 7.72
 8 4 -11 -1.27 4.49
 8 4 -11 9.64 5.07
 -8 4 11 2.31 2.43
 -8 4 11 -0.31 2.9
 8 4 -11 -3.4 3.89
 -8 4 11 2.59 2.02
 8 4 -10 77.01 7.83
 -8 4 10 83.58 7.16
 -8 4 10 93.47 7.63
 8 4 -10 72.24 7.28
 8 4 -9 254.03 16.82
 -8 4 9 260.44 16.62
 -8 4 9 283.65 17.15
 8 4 -9 229.12 16.3
 8 4 -8 105.78 8.91
 -8 4 8 103.96 8.38
 -8 4 7 72.1 6.8
 8 4 -7 87.81 7.85
 -8 4 6 107.65 8.46
 8 4 -6 113.28 9.1
 -8 4 5 84.87 7.41
 -8 4 5 107.98 8.07
 8 4 -5 106.59 8.16
 -8 4 4 445.71 29.08
 -8 4 4 525.84 29.46
 8 4 -3 278.47 16.6
 -8 4 3 272.48 16.85
 -8 4 3 233.96 16.49
 -8 4 2 156.84 10.78
 8 4 -1 117.51 9.08
 -8 4 1 124.33 9.75
 8 4 -1 140.41 9.54
 -8 4 0 114.29 8.87
 -8 4 0 105.75 8.7
 8 4 0 111.18 8.22
 -8 4 -1 3.94 2.91
 8 4 1 1.46 2.95
 -8 4 -1 0.16 2.41
 8 4 2 63.28 5.87
 -8 4 -2 48.89 5.51
 8 4 2 59.11 5.55
 -8 4 -2 58.62 6.52
 8 4 3 338.08 21.54
 8 4 3 376.81 21.46
 -8 4 -3 382.47 22.44
 8 4 4 11.11 3.04
 8 4 4 9.19 2.54
 -8 4 -4 9.8 3.64
 8 4 4 11.4 2.88
 8 4 5 7.39 3.03
 -8 4 -5 7.63 3.37
 -8 4 -5 6.15 3.68
 8 4 5 8.77 2.43
 8 4 5 6.95 2.56
 8 4 6 33.74 3.79
 8 4 6 41.01 4.42
 8 4 6 38.15 4.19
 -8 4 -6 24.49 4.43
 -8 4 -6 33.03 4.86
 8 4 6 33.94 3.55
 -8 4 -7 25.29 5.46
 8 4 7 19.55 3.03
 8 4 7 23.18 3.28
 -8 4 -7 18.36 3.38
 -8 4 -7 22.66 3.91
 8 4 8 146.48 9.56
 -8 4 -8 162.4 10.47
 8 4 9 14.87 1.91
 8 4 9 13.36 1.91
 -8 4 -9 11.8 2.95
 8 4 9 20.66 2.26
 -8 4 -9 15.89 2.84
 8 5 -13 6.89 1.94
 -8 5 13 10.66 1.67
 8 5 -13 10.71 1.96
 8 5 -13 11.76 2.09
 8 5 -12 0.81 2.4
 -8 5 12 2.96 1.95
 -8 5 12 2.22 1.43
 -8 5 12 2.86 1.28
 8 5 -11 14.19 3.41
 -8 5 11 12.85 2.4
 -8 5 11 11.81 2.2
 -8 5 10 212.15 14.99
 -8 5 10 244.99 15.17
 8 5 -10 240.71 15.55
 -8 5 9 69.68 5.74
 -8 5 9 68.51 5.71
 8 5 -9 77.43 6.55
 -8 5 8 129.74 9.45
 -8 5 8 138.31 9.6
 8 5 -8 156.61 10.33
 8 5 -7 15.45 3.49
 -8 5 7 5.37 1.94
 -8 5 6 149.61 10.63
 -8 5 5 222.8 14.99
 8 5 -5 238.51 14.89
 -8 5 4 17.16 3.04
 8 5 -3 18.89 3.44
 -8 5 3 25.28 3.99
 -8 5 2 91.8 7.75
 8 5 -2 102.71 7.56
 -8 5 1 5.57 2.76
 -8 5 1 7.27 2.54
 -8 5 0 22.26 3.54
 8 5 1 134.98 8.85
 -8 5 -1 150.23 9.97
 8 5 2 103.66 7.46
 -8 5 -2 109.55 8.3
 8 5 3 31.26 3.14
 -8 5 -3 31.83 4.09
 8 5 4 165.63 10.17
 -8 5 -4 169.35 10.8
 -8 5 -5 32.43 4.45
 8 5 5 32.94 3.29
 8 5 5 28.11 2.98
 -8 5 -5 27.33 3.75
 -8 5 -6 13.83 3.14
 8 5 6 8.3 1.69
 8 5 6 6.68 1.38
 -8 5 -6 9.55 2.37
 -8 5 -7 7.13 2.19
 -8 5 -7 3.81 2.67
 8 5 7 3.86 1.29
 -8 5 -7 1.07 2.11
 -8 5 -7 5.33 2.43
 8 6 -9 43.47 3.49
 -8 6 9 34.98 3.03
 8 6 -8 92.25 6.2
 -8 6 8 82.26 6.15
 8 6 -7 9.6 2.29
 -8 6 7 4.03 1.61
 -8 6 7 6.67 1.94
 8 6 -6 21.54 2.72
 -8 6 6 19.31 2.7
 -8 6 5 38.84 3.67
 8 6 -4 8.41 2.18
 -8 6 4 9.11 2.28
 -8 6 3 19.99 2.72
 -8 6 2 46.81 3.93
 -8 6 1 76.57 5.92
 -8 6 0 78.55 5.8
 -8 6 -1 55.03 4.64
 -8 6 -1 81.13 5.27
 -8 6 -2 45.58 3.76
 -8 6 -3 6.88 1.96
 -9 -6 8 39.15 3.11
 9 -6 -8 29.93 3.3
 9 -6 -8 28.87 3.06
 9 -6 -7 2.3 2.24
 -9 -6 7 5.21 1.63
 9 -6 -7 6.64 2.2
 9 -6 -6 108.48 8.6
 9 -6 -6 118.01 8.55
 9 -6 -5 40.42 4.37
 9 -6 -5 38.9 4
 9 -6 -4 71.57 6.05
 -9 -6 4 58.04 5.64
 9 -6 -4 62.39 5.57
 9 -6 -3 135.77 9.09
 -9 -6 3 115.75 8.91
 9 -6 -3 126.77 8.79
 9 -6 -2 32.56 4.03
 -9 -6 2 42.23 4.43
 9 -6 -2 47.03 4.24
 9 -6 -1 58.43 4.91
 -9 -6 1 61.3 5.53
 9 -6 -1 65.36 5.09
 9 -6 0 35.15 3.42
 -9 -6 0 37.53 4.04
 9 -6 0 37.34 3.6
 9 -6 1 29.7 2.83
 -9 -6 -1 25.41 3.24
 9 -6 1 31.19 2.95
 9 -6 2 56.28 4.13
 9 -5 -12 32.5 3.37
 -9 -5 12 37.45 2.94
 9 -5 -12 32.25 3.39
 9 -5 -11 194.9 13.41
 -9 -5 11 231.98 13.27
 9 -5 -11 203.16 13.49
 9 -5 -10 1.98 3.04
 -9 -5 10 2.49 2.19
 9 -5 -10 -0.13 2.82
 9 -5 -9 35.67 5.1
 -9 -5 9 44.78 4.67
 -9 -5 9 49.29 4.66
 9 -5 -9 50.27 5.42
 9 -5 -8 15.14 4.24
 -9 -5 8 19.08 3.56
 -9 -5 8 20.16 3.52
 -9 -5 8 8.47 2.93
 9 -5 -8 20.2 4.44
 9 -5 -7 7.73 4.03
 -9 -5 7 6.87 3.27
 -9 -5 7 6.65 3.23
 9 -5 -7 6.94 3.98
 9 -5 -6 35.54 5.3
 -9 -5 6 35.35 4.57
 -9 -5 6 20.61 4.62
 9 -5 -6 27.74 5.22
 9 -5 -5 15.86 4.59
 -9 -5 5 9.87 3.34
 -9 -5 5 9.26 4.2
 9 -5 -5 12.8 3.92
 9 -5 -5 12.74 4.62
 9 -5 -4 74.82 8
 -9 -5 4 103.22 7.43
 9 -5 -4 77.61 8.08
 -9 -5 4 70.81 7.91
 9 -5 -4 81.95 7.96
 9 -5 -3 56.06 6.77
 -9 -5 3 64.56 5.77
 9 -5 -3 60.38 7.29
 -9 -5 3 58 6.9
 9 -5 -3 47.95 6.29
 -9 -5 2 45.9 5.61
 9 -5 -2 49.67 6.42
 -9 -5 2 59.26 5.32
 -9 -5 2 42.54 6.11
 9 -5 -2 49.32 6.97
 9 -5 -2 45.92 6.02
 -9 -5 1 8.02 3.88
 9 -5 -1 14.99 4.86
 -9 -5 1 8.7 4.17
 9 -5 -1 12.53 5.07
 9 -5 -1 15.11 4.36
 -9 -5 0 3.19 3.58
 9 -5 0 -6.19 3.62
 9 -5 0 1.92 3.85
 9 -5 1 24.63 3.96
 9 -5 1 19.5 3.93
 9 -5 1 30.72 4.81
 9 -5 2 30.51 3.76
 9 -5 2 28.95 4.43
 -9 -5 -2 25.35 4.36
 9 -5 2 34.45 4.67
 9 -5 3 41.65 3.83
 9 -5 3 32.03 4.62
 -9 -5 -3 29.59 4.62
 9 -5 3 41.25 4.61
 9 -5 4 105.75 6.99
 9 -5 4 101.63 8.15
 -9 -5 -4 107.17 8.04
 9 -5 5 19.96 3.14
 -9 -5 -5 21.14 2.91
 9 -5 6 8.92 1.9
 9 -4 -14 145.79 8.96
 9 -4 -14 167.96 9.38
 9 -4 -13 17.32 3.63
 9 -4 -13 10.33 3.1
 -9 -4 13 11.98 3.21
 9 -4 -13 9.88 3.29
 9 -4 -12 6.71 3.99
 9 -4 -12 2.96 3.22
 -9 -4 12 8.22 3.61
 -9 -4 12 5.7 2.17
 9 -4 -12 6.45 3.76
 9 -4 -11 88.7 8.65
 9 -4 -11 83.04 7.06
 9 -4 -11 82.31 7.68
 -9 -4 11 91.08 8.85
 -9 -4 11 82.82 6.98
 -9 -4 11 86.55 6.65
 9 -4 -10 77.9 8.28
 9 -4 -10 58.17 6.85
 -9 -4 10 72.11 8.4
 9 -4 -10 60.14 6.39
 -9 -4 10 67.74 6.4
 -9 -4 10 68.72 5.99
 9 -4 -9 213.9 15.47
 -9 -4 9 161.63 13.95
 9 -4 -9 193.86 14.24
 -9 -4 9 209.81 15.76
 9 -4 -9 190.35 13.99
 -9 -4 9 198.26 13.79
 -9 -4 9 213.06 13.6
 -9 -4 8 12.13 4.49
 9 -4 -8 9.03 5.45
 9 -4 -8 9.44 4.59
 -9 -4 8 11.97 5.5
 9 -4 -8 11.15 4.47
 -9 -4 8 12.22 3.97
 -9 -4 8 14.01 3.74
 -9 -4 7 160.83 13.11
 9 -4 -7 167.4 12.68
 -9 -4 7 147.8 13.54
 9 -4 -7 165.76 12.56
 -9 -4 7 162.01 12.17
 9 -4 -7 144.09 11.96
 -9 -4 7 170.19 11.92
 -9 -4 6 266.61 18.81
 9 -4 -6 266.42 17.97
 -9 -4 6 267.7 19.38
 9 -4 -6 270.94 18.15
 9 -4 -6 204.2 17.49
 -9 -4 6 286.35 17.59
 -9 -4 5 230.6 18.19
 9 -4 -5 270.11 17.8
 9 -4 -5 252.89 17.61
 -9 -4 5 253.69 19.07
 9 -4 -5 256.18 18.14
 -9 -4 4 189.23 14.68
 -9 -4 4 195.41 15.72
 9 -4 -4 207.23 15
 -9 -4 4 218.43 16.53
 -9 -4 4 182.87 14.91
 9 -4 -4 219.96 15.25
 -9 -4 4 215.71 14.82
 9 -4 -4 206.17 15.71
 -9 -4 4 244.55 14.88
 -9 -4 3 200.92 16.48
 -9 -4 3 239.67 17.36
 -9 -4 3 239.37 16.91
 9 -4 -3 209.15 15.97
 9 -4 -3 232.59 16.55
 -9 -4 3 260.05 16.15
 9 -4 -3 264.98 17.59
 -9 -4 2 67.1 8.04
 -9 -4 2 68.99 8.35
 9 -4 -2 68.4 7.6
 -9 -4 2 77.77 8.09
 -9 -4 2 78.2 6.83
 9 -4 -2 66.23 8.44
 -9 -4 1 102.69 9.94
 -9 -4 1 85.47 9.64
 -9 -4 1 104.52 9.74
 9 -4 -1 102.25 9
 -9 -4 1 123.81 8.64
 9 -4 -1 88.11 8.41
 9 -4 -1 101.35 10.07
 9 -4 -1 81.45 8.94
 -9 -4 0 190.31 14.65
 9 -4 0 196.09 13.49
 9 -4 0 158.76 13.23
 9 -4 0 188.66 14.48
 -9 -4 0 173.85 13.64
 9 -4 0 175.59 13.41
 -9 -4 -1 1.07 3.29
 -9 -4 -1 4.18 5.28
 9 -4 1 0.24 3.78
 -9 -4 -1 -1.08 4.46
 9 -4 1 -1.36 5.84
 9 -4 1 -4 5.01
 -9 -4 -2 15.97 4.43
 -9 -4 -2 16.68 5.34
 9 -4 2 7.52 3.43
 9 -4 2 12.04 4.75
 -9 -4 -2 11.92 4.59
 9 -4 2 9.32 4.55
 -9 -4 -3 70.37 7.22
 -9 -4 -3 65.16 7.87
 9 -4 3 59.36 5.63
 9 -4 3 66.03 7.67
 -9 -4 -3 64.96 7.23
 9 -4 3 68.45 6.88
 -9 -4 -4 111.55 9.33
 9 -4 4 103.75 7.56
 9 -4 4 103.77 9.79
 -9 -4 -4 110 9.02
 9 -4 4 116.92 8.99
 -9 -4 -5 42.37 5.33
 -9 -4 -5 36.81 5.84
 9 -4 5 27.23 5.4
 -9 -4 -5 36.41 4.82
 9 -4 5 44.94 4.99
 -9 -4 -6 8.17 3.17
 9 -4 6 6.07 2.12
 9 -4 6 2.31 3.42
 -9 -4 -6 6.27 2.59
 9 -4 7 80.81 6.35
 9 -4 7 89.96 7.62
 -9 -4 -8 11.72 2.19
 9 -3 -16 67.27 5.31
 -9 -3 16 63.14 5.05
 9 -3 -16 61.13 5.12
 9 -3 -15 17.1 3.84
 9 -3 -15 15.76 2.8
 -9 -3 15 12.94 3.15
 -9 -3 15 15.74 3.11
 9 -3 -15 13.11 3.27
 9 -3 -14 6.46 4.15
 9 -3 -14 7.35 2.98
 9 -3 -14 7.32 2.39
 -9 -3 14 4.89 3.55
 -9 -3 14 7.5 3.14
 9 -3 -14 9.44 3.79
 9 -3 -13 111.07 10.05
 9 -3 -13 103.38 8.56
 9 -3 -13 94.35 7.97
 -9 -3 13 106.16 9.05
 9 -3 -13 110.45 9.23
 -9 -3 13 110.64 10.04
 -9 -3 12 153.8 12.42
 9 -3 -12 140.8 12.04
 -9 -3 12 112.28 9.98
 9 -3 -12 147.78 10.67
 -9 -3 12 135.32 9.39
 9 -3 -12 122.55 10.13
 -9 -3 12 133.56 11.02
 9 -3 -12 137.02 11.03
 9 -3 -11 124.41 11.67
 -9 -3 11 106.37 10.13
 9 -3 -11 119.32 10.08
 -9 -3 11 127.68 11.92
 9 -3 -11 129.31 10.35
 -9 -3 11 130.38 9.36
 -9 -3 11 127.33 10.84
 -9 -3 11 131.84 9.01
 9 -3 -11 122.15 10.79
 -9 -3 10 26.18 5.45
 9 -3 -10 24.26 6.79
 9 -3 -10 20.9 4.79
 9 -3 -10 29.52 5.47
 -9 -3 10 18.28 5.82
 -9 -3 10 25.55 5.35
 -9 -3 10 24.35 3.91
 -9 -3 10 23.98 3.61
 9 -3 -10 24.02 5.43
 -9 -3 9 15.42 5.22
 9 -3 -9 21.23 6.61
 9 -3 -9 17.63 4.6
 9 -3 -9 18.08 5.09
 -9 -3 9 20.85 5.99
 -9 -3 9 19.1 4.87
 -9 -3 9 13.59 3.64
 -9 -3 9 16.96 3.48
 9 -3 -9 15.93 5.35
 9 -3 -9 13.5 4.09
 9 -3 -8 3.77 3.95
 -9 -3 8 2.07 3.97
 9 -3 -8 0.53 5.68
 9 -3 -8 2.08 3.88
 9 -3 -8 1.21 4.55
 -9 -3 8 -2.61 5.33
 -9 -3 8 1.57 3.93
 -9 -3 8 1.56 3.14
 -9 -3 8 2.45 2.84
 9 -3 -8 0.21 4.68
 9 -3 -7 33.08 5.89
 -9 -3 7 30.68 5.63
 9 -3 -7 33.71 7.16
 9 -3 -7 36.79 5.42
 9 -3 -7 34.46 5.88
 -9 -3 7 33.24 6.49
 -9 -3 7 40.11 5.8
 -9 -3 7 38.1 4.93
 -9 -3 7 29.74 4.63
 9 -3 -7 35.5 5.98
 9 -3 -6 81.27 9.58
 -9 -3 6 80.76 8.92
 -9 -3 6 66.16 7.79
 9 -3 -6 72.28 7.79
 9 -3 -6 90.21 8.44
 -9 -3 6 97.61 7.94
 9 -3 -6 75.51 8.45
 -9 -3 6 94.77 7.53
 9 -3 -6 86.6 8.3
 -9 -3 5 200.56 16.85
 -9 -3 5 251.54 17.87
 -9 -3 5 252.74 17.59
 9 -3 -5 242.03 16.37
 9 -3 -5 246.04 16.84
 9 -3 -5 249.87 17.2
 -9 -3 5 262.29 17
 9 -3 -5 261.41 17.82
 -9 -3 5 286.86 16.94
 9 -3 -5 246.54 17.25
 -9 -3 4 327.98 22.97
 -9 -3 4 368.69 23.42
 -9 -3 4 364.03 23.21
 9 -3 -4 287.33 21.65
 9 -3 -4 363.33 22.24
 9 -3 -4 380.58 23.32
 9 -3 -4 362.66 22.58
 -9 -3 3 36.28 6.28
 -9 -3 3 43.2 6.6
 -9 -3 3 40.71 5.94
 9 -3 -3 36.99 5.37
 9 -3 -3 39.79 5.33
 -9 -3 3 48.82 5.33
 -9 -3 3 42.82 7.06
 9 -3 -3 37.96 5.64
 9 -3 -3 44.85 6.7
 9 -3 -2 15.43 4.28
 -9 -3 2 24.04 5.67
 -9 -3 2 21.42 5.13
 9 -3 -2 17.76 4.66
 -9 -3 2 24.14 4
 -9 -3 2 22.2 6.07
 9 -3 -2 17.85 4.88
 9 -3 -2 24.27 5.04
 9 -3 -2 22.22 5.61
 -9 -3 1 393.74 28.06
 -9 -3 1 422.71 27.94
 9 -3 -1 394.87 26.91
 9 -3 -1 410.22 26.66
 9 -3 -1 447.48 27.29
 9 -3 -1 395.92 27.55
 9 -3 -1 419.05 27.01
 -9 -3 0 396.33 28.24
 -9 -3 0 441.6 29.39
 -9 -3 0 489.77 29.65
 -9 -3 0 457.04 29.31
 9 -3 0 454.95 28.32
 9 -3 0 481.66 28.05
 9 -3 0 450.03 28.12
 -9 -3 -1 46.54 6.53
 -9 -3 -1 54.33 7.49
 -9 -3 -1 45.84 6.81
 -9 -3 -1 46.27 6.81
 9 -3 1 51.51 6.53
 9 -3 1 43.19 7.04
 9 -3 1 43.87 5.89
 -9 -3 -2 489.58 28.45
 9 -3 2 377.93 25.76
 -9 -3 -2 433.86 28.59
 9 -3 2 441.77 26.93
 9 -3 2 452.59 28.45
 9 -3 2 457.02 28.15
 -9 -3 -2 468.75 27.75
 9 -3 2 421.51 26.97
 -9 -3 -3 156.19 12.18
 9 -3 3 128.75 9.45
 9 -3 3 150.28 10.87
 9 -3 3 117.42 11.74
 9 -3 3 149.67 12.17
 -9 -3 -3 149.84 10.96
 -9 -3 -3 155.82 11.39
 9 -3 3 129.37 10.78
 -9 -3 -4 31.99 6.25
 -9 -3 -4 34.91 6.74
 9 -3 4 29.79 4.81
 9 -3 4 20.42 5.53
 -9 -3 -4 31.3 5.16
 -9 -3 -4 33.62 4.93
 9 -3 4 39.81 6.77
 9 -3 4 28.5 5.02
 -9 -3 -5 27.94 5.81
 -9 -3 -5 26.46 5.77
 9 -3 5 20.67 4.26
 9 -3 5 24.16 5.46
 -9 -3 -5 27.67 4.94
 -9 -3 -5 21.68 4.04
 9 -3 5 35.04 4.89
 -9 -3 -6 26.45 5.46
 -9 -3 -6 27.32 5.39
 9 -3 6 21.92 4.16
 -9 -3 -6 27.11 4.77
 -9 -3 -6 27.23 3.74
 9 -3 6 40.58 4.84
 -9 -3 -7 93.75 8.35
 -9 -3 -7 105.66 8.59
 9 -3 7 81.09 7.45
 9 -3 7 85.2 8.39
 -9 -3 -7 96.32 7.67
 -9 -3 -8 37.79 4.83
 9 -3 8 31.9 4
 9 -3 8 34.01 4.83
 -9 -3 -8 32.96 4.09
 9 -3 9 17.53 2.65
 9 -3 9 12.45 2.94
 -9 -3 -9 18.31 2.71
 9 -2 -17 27.07 3.49
 -9 -2 17 24.5 3.14
 -9 -2 17 22.93 2.6
 9 -2 -17 25.8 2.94
 9 -2 -16 2.24 3.37
 -9 -2 16 5.7 3.2
 -9 -2 16 2.16 2.25
 9 -2 -16 1.82 2.67
 9 -2 -15 72.29 7.55
 9 -2 -15 50.26 5.1
 9 -2 -15 52.79 5.26
 -9 -2 15 52.29 6.64
 -9 -2 15 55.28 5.74
 9 -2 -15 61.7 6.21
 -9 -2 14 29.92 4.49
 9 -2 -14 52.72 7.37
 9 -2 -14 41.44 4.92
 9 -2 -14 37.56 4.94
 -9 -2 14 40.65 6.61
 -9 -2 14 43.58 5.42
 9 -2 -14 38.06 5.58
 -9 -2 13 54.44 6.58
 9 -2 -13 64.59 6.5
 -9 -2 13 82.51 9.08
 9 -2 -13 64.69 7.01
 -9 -2 13 83.56 7.72
 9 -2 -13 72.59 7.56
 -9 -2 12 47.07 6.29
 9 -2 -12 51.21 5.97
 9 -2 -12 58.09 6.86
 -9 -2 12 66.25 8.53
 -9 -2 12 54.99 6.58
 9 -2 -12 52.14 6.9
 -9 -2 11 170.65 13.17
 9 -2 -11 163.29 12.17
 -9 -2 11 172.14 14.51
 -9 -2 11 168.28 11.24
 9 -2 -11 157.23 12.67
 -9 -2 11 182.03 13.05
 9 -2 -11 154.73 11.96
 9 -2 -11 171.75 13.15
 -9 -2 10 163.18 13.26
 9 -2 -10 172.65 12.41
 -9 -2 10 172.76 11.71
 9 -2 -10 162.45 12.98
 -9 -2 10 170.34 13.01
 9 -2 -10 163.69 12.58
 -9 -2 10 184.41 11.51
 9 -2 -10 158.99 12.84
 9 -2 -9 351.79 25.46
 -9 -2 9 367.2 24.78
 9 -2 -9 384.06 23.81
 -9 -2 9 374.33 23.36
 9 -2 -9 361.53 24.32
 -9 -2 9 386.27 24.49
 9 -2 -9 358.11 24.24
 -9 -2 9 359.64 24.22
 -9 -2 9 422.94 23.29
 9 -2 -9 382 24.42
 9 -2 -8 16.82 4.57
 -9 -2 8 18.4 5
 9 -2 -8 18.43 5.9
 -9 -2 8 22.16 4.19
 -9 -2 8 16.9 4.3
 9 -2 -8 20.07 3.92
 9 -2 -8 16.3 4.82
 -9 -2 8 17.7 3.51
 -9 -2 8 20.11 3.32
 9 -2 -8 20.7 4.58
 9 -2 -7 72.85 7.56
 9 -2 -7 64.2 8.16
 -9 -2 7 70.06 7.65
 9 -2 -7 71.52 6.53
 -9 -2 7 80 8.4
 -9 -2 7 70 6.32
 -9 -2 7 75.65 7.01
 9 -2 -7 78.32 7.62
 -9 -2 7 77.15 6.35
 -9 -2 7 71.75 7.46
 9 -2 -7 58.93 6.88
 9 -2 -6 8.37 4.28
 -9 -2 6 6.4 4.04
 9 -2 -6 6.97 4.64
 -9 -2 6 4.65 3.61
 9 -2 -6 11.19 3.14
 -9 -2 6 9.64 4.58
 -9 -2 6 6.27 3.27
 -9 -2 6 2.46 2.6
 -9 -2 6 6.68 2.75
 9 -2 -6 6.74 3.62
 9 -2 -5 135.11 10.88
 -9 -2 5 115.07 10.17
 -9 -2 5 115.87 10.1
 9 -2 -5 122.04 9.06
 -9 -2 5 116.86 10.52
 -9 -2 5 132.51 9.36
 9 -2 -5 119.19 10.11
 9 -2 -5 124.64 9.6
 -9 -2 4 426.88 27.45
 9 -2 -4 426.25 27.43
 9 -2 -4 392.51 25.85
 -9 -2 4 478.44 28.24
 -9 -2 4 450.93 26.38
 9 -2 -4 424.4 26.57
 9 -2 -4 419.67 27.01
 9 -2 -4 448.32 26.55
 9 -2 -3 48.05 6.11
 -9 -2 3 49.15 6.04
 9 -2 -3 48.3 6.42
 -9 -2 3 52.17 6.25
 9 -2 -3 47.09 4.84
 -9 -2 3 48.1 5.07
 -9 -2 3 46.92 6.32
 9 -2 -3 43.51 5.59
 9 -2 -3 46.7 5.23
 -9 -2 2 30.04 4.85
 -9 -2 2 41.3 5.91
 -9 -2 2 37.96 5.72
 -9 -2 2 33.96 5.55
 9 -2 -2 31.84 4.15
 -9 -2 2 37.52 5.75
 9 -2 -2 35.62 4.96
 9 -2 -2 29.66 4.57
 -9 -2 1 81.99 7.89
 9 -2 -1 76.24 7.08
 -9 -2 1 80.54 8.37
 -9 -2 1 90.5 8.33
 -9 -2 1 81.42 8.24
 9 -2 -1 73.53 6.6
 -9 -2 1 99.29 8.8
 -9 -2 1 94.66 7.14
 9 -2 -1 83.4 7.49
 9 -2 -1 77.15 7.91
 9 -2 -1 81.58 7.14
 -9 -2 0 68.65 7.56
 9 -2 0 69.29 6.86
 -9 -2 0 75.32 8.12
 -9 -2 0 89.63 8.18
 9 -2 0 69.71 6.78
 9 -2 0 66.62 6.94
 9 -2 0 79.83 6.54
 9 -2 0 76.34 7.75
 9 -2 0 80.86 6.84
 -9 -2 -1 1502.97 87.01
 -9 -2 -1 1663.61 87.6
 9 -2 1 1467.18 86.77
 9 -2 1 1425.28 85.84
 -9 -2 -2 342.79 23.75
 -9 -2 -2 366.82 24.43
 -9 -2 -2 379.09 23.97
 -9 -2 -2 401.18 24.7
 9 -2 2 350.24 22.92
 9 -2 2 349.42 23.53
 9 -2 2 381.22 23.16
 9 -2 2 341.89 22.52
 -9 -2 -3 133.5 11.58
 -9 -2 -3 129.2 11.59
 -9 -2 -3 150.36 11.97
 9 -2 3 120.97 10.13
 9 -2 3 121.78 10.06
 9 -2 3 137.66 10.99
 -9 -2 -3 122.35 10.67
 -9 -2 -3 127.24 9.97
 9 -2 3 134.92 9.97
 -9 -2 -4 9.35 5.48
 -9 -2 -4 9.5 4.76
 -9 -2 -4 7.26 5.08
 9 -2 4 8.51 4.32
 9 -2 4 8.67 3.75
 9 -2 4 9.7 2.64
 -9 -2 -4 10.86 4.83
 -9 -2 -4 12.97 3.32
 9 -2 4 7.7 4.44
 9 -2 4 12.4 3.8
 -9 -2 -5 249.41 19.02
 -9 -2 -5 295.88 19.51
 9 -2 5 260.5 18.18
 9 -2 5 259.79 18.19
 -9 -2 -5 250.65 18.43
 9 -2 5 297 17.67
 -9 -2 -6 49.17 6.46
 9 -2 6 34.95 5.59
 9 -2 6 45.04 6.38
 -9 -2 -6 44.47 6.43
 -9 -2 -7 102.92 8.77
 9 -2 7 87.42 8.38
 9 -2 7 95.49 8.84
 -9 -2 -7 87.56 8.59
 -9 -2 -8 113.25 9.63
 -9 -2 -8 123.72 8.75
 9 -2 8 94.7 8.49
 9 -2 8 104.22 9.04
 -9 -2 -8 97.17 8.87
 -9 -2 -9 10.13 3.88
 9 -2 9 8.79 3.04
 9 -2 9 14.19 3.41
 -9 -2 -9 9.23 3.42
 -9 -2 -10 47.07 4.42
 9 -2 10 41.12 4.07
 -9 -2 -10 46.85 4.32
 9 -1 -17 23.25 4.19
 9 -1 -17 16.58 2.52
 -9 -1 17 18.1 2.31
 9 -1 -17 17.39 2.92
 -9 -1 16 24.55 3.46
 9 -1 -16 38.41 5.93
 9 -1 -16 29.89 4.12
 -9 -1 16 33.06 5.37
 -9 -1 16 28.27 3.64
 -9 -1 15 16.33 3.67
 9 -1 -15 12.04 5.81
 9 -1 -15 15.97 4.28
 -9 -1 15 14.12 5.38
 -9 -1 15 16.66 3.47
 9 -1 -15 14.81 4.2
 -9 -1 14 56.98 6.47
 -9 -1 14 60.97 7.1
 9 -1 -14 68.24 8.93
 9 -1 -14 63.03 7.01
 -9 -1 14 58.67 6.33
 9 -1 -14 69.89 7.08
 9 -1 -13 2.81 3.13
 -9 -1 13 -1.38 4.14
 -9 -1 13 1.67 3.8
 9 -1 -13 -3.26 6.34
 9 -1 -13 0.2 4.89
 -9 -1 13 3.52 3.42
 9 -1 -13 2.13 4.23
 -9 -1 12 590.39 40
 9 -1 -12 715.14 41.65
 -9 -1 12 658.78 40.47
 9 -1 -12 682.54 40.2
 -9 -1 12 631.9 41.63
 -9 -1 12 650.31 39.83
 9 -1 -12 641.94 39.44
 9 -1 -12 703.62 40.14
 9 -1 -11 12.15 4.17
 -9 -1 11 7.56 4.09
 9 -1 -11 10.64 5.82
 -9 -1 11 11.71 4.38
 9 -1 -11 0.2 5.49
 -9 -1 11 11.67 5.24
 -9 -1 11 15.88 3.87
 9 -1 -11 17.58 4.54
 -9 -1 10 62.9 7.33
 -9 -1 10 70.72 7.25
 9 -1 -10 62.57 8.55
 9 -1 -10 49.54 7.36
 -9 -1 10 64.83 6.45
 -9 -1 10 63.11 8.18
 9 -1 -10 63.48 6.87
 9 -1 -10 68.5 7
 9 -1 -9 160.88 13
 -9 -1 9 137.55 11.54
 -9 -1 9 161.58 12.9
 -9 -1 9 148.1 11.2
 -9 -1 9 147.5 10.32
 9 -1 -9 162.31 11.76
 9 -1 -9 150.22 11.31
 9 -1 -8 100.77 9.33
 -9 -1 8 95.85 8.54
 -9 -1 8 99.27 7.14
 -9 -1 8 105.04 9.45
 -9 -1 8 97.63 8.01
 -9 -1 8 98.7 7.29
 9 -1 -8 90.3 8.4
 9 -1 -8 95.69 8.11
 9 -1 -8 85.26 7.26
 9 -1 -7 434.69 26.06
 -9 -1 7 427.71 26.14
 -9 -1 7 429.03 24.24
 9 -1 -7 412.81 25.19
 -9 -1 7 400.82 24.89
 -9 -1 7 376.87 24.23
 9 -1 -7 388.3 25.2
 9 -1 -7 387.99 24.67
 9 -1 -7 379.74 24.31
 9 -1 -6 22.58 4.02
 9 -1 -6 25.4 4.67
 9 -1 -6 28 4.99
 9 -1 -6 33.28 4.81
 -9 -1 6 25.62 4.75
 -9 -1 6 29.42 3.84
 -9 -1 6 26.76 3.37
 -9 -1 6 28.22 3.28
 9 -1 -6 23.86 3.93
 9 -1 -5 48.33 5.26
 9 -1 -5 46.7 5.78
 -9 -1 5 52.27 5.76
 -9 -1 5 50.8 5.9
 -9 -1 5 53.96 4.57
 9 -1 -5 48.84 5.35
 -9 -1 5 45.31 4.49
 9 -1 -5 44.02 5.58
 9 -1 -5 40.27 4.66
 9 -1 -5 45.32 5.12
 9 -1 -4 468.46 28.59
 9 -1 -4 463.24 28.03
 -9 -1 4 441.07 27.98
 -9 -1 4 458.04 28.3
 -9 -1 4 489.19 28.61
 -9 -1 4 542.85 27.3
 9 -1 -4 393.96 27.74
 9 -1 -4 455.96 27.54
 -9 -1 4 422.44 27.15
 9 -1 -4 434.13 27.02
 9 -1 -4 423.01 27.3
 9 -1 -3 297.11 18.52
 9 -1 -3 275.24 17.39
 -9 -1 3 286.21 18.55
 -9 -1 3 240.23 17.32
 -9 -1 3 286.58 18.8
 -9 -1 3 293.37 18.64
 -9 -1 3 344.73 17.77
 9 -1 -3 275.04 17.78
 9 -1 -3 259.96 18.17
 9 -1 -3 270.98 17.34
 9 -1 -3 267.89 17.78
 -9 -1 2 86.4 7.61
 9 -1 -2 103.84 7.74
 -9 -1 2 110.83 8.86
 9 -1 -2 101.27 7.23
 -9 -1 2 111.31 8.75
 9 -1 -2 105.3 7.93
 9 -1 -2 111.38 8.69
 9 -1 -2 99.47 7.53
 9 -1 -2 99.67 8.15
 9 -1 -1 72.56 6.45
 -9 -1 1 77.59 7.15
 -9 -1 1 70.62 6.64
 9 -1 -1 73.7 5.9
 -9 -1 1 83.17 7.17
 9 -1 -1 71.62 6.29
 9 -1 -1 74.02 7.13
 9 -1 -1 73.7 6.03
 -9 -1 1 86.21 7.9
 9 -1 0 136.16 10.21
 -9 -1 0 151.98 10.98
 -9 -1 0 167.6 11.78
 9 -1 0 133.58 9.58
 -9 -1 0 130.89 10.07
 9 -1 0 142.42 9.91
 9 -1 0 126.84 10.48
 9 -1 0 139.47 9.58
 -9 -1 -1 215.6 15.95
 9 -1 1 217.41 14.96
 -9 -1 -1 247.7 15.41
 -9 -1 -1 246.64 16.22
 9 -1 1 219.04 13.83
 9 -1 1 190 14.06
 -9 -1 -1 223.55 14.91
 9 -1 1 229.33 14.17
 9 -1 1 222.79 15.09
 9 -1 1 215.56 14.12
 9 -1 2 171.35 11.36
 -9 -1 -2 167.88 13.19
 -9 -1 -2 173.83 13.5
 9 -1 2 159.4 12.51
 -9 -1 -2 181.7 12.56
 -9 -1 -2 167.16 12.55
 -9 -1 -2 202.82 13.87
 9 -1 2 175.9 11.62
 9 -1 2 164.23 12.43
 9 -1 2 168.44 11.46
 -9 -1 -3 145.01 12.24
 -9 -1 -3 160.21 12.49
 9 -1 3 145.54 11.62
 9 -1 3 144.98 10.3
 -9 -1 -3 141.78 12.03
 9 -1 3 152.99 11.14
 -9 -1 -3 142.3 11.66
 9 -1 3 158.16 10.7
 9 -1 3 153.42 11.34
 9 -1 3 137.59 10.04
 9 -1 3 173.67 10.57
 -9 -1 -4 283.61 17.61
 9 -1 4 211.41 16.55
 -9 -1 -4 255.56 17.33
 9 -1 4 210.59 15.1
 9 -1 4 235.12 15.85
 -9 -1 -4 258.22 17.12
 9 -1 4 236.65 15.95
 9 -1 4 227.8 15.56
 9 -1 4 224.5 15.08
 9 -1 4 260.74 15.31
 -9 -1 -5 5.58 4.01
 -9 -1 -5 4.69 3.73
 9 -1 5 4.35 3.23
 -9 -1 -5 3.49 4.99
 9 -1 5 5.28 4.16
 9 -1 5 3.33 2.92
 -9 -1 -6 145.05 12.34
 -9 -1 -6 138.07 11.09
 9 -1 6 139.44 11.24
 9 -1 6 133.83 10.42
 -9 -1 -7 72.77 8.39
 -9 -1 -7 65.44 6.41
 9 -1 7 62.13 6.26
 -9 -1 -7 59.06 7.98
 -9 -1 -8 88.66 8.75
 9 -1 8 76.34 7.71
 -9 -1 -8 86.25 8.79
 -9 -1 -9 8.09 4.13
 9 -1 9 13.01 3.7
 9 -1 9 7.67 2.98
 -9 -1 -9 13.4 4.9
 -9 -1 -10 83.2 6.27
 9 -1 10 79.63 6.1
 -9 -1 -10 77.73 6.61
 9 -1 11 2.42 1.63
 -9 0 17 7.61 2.26
 9 0 -17 10.54 3.53
 9 0 -17 11.5 2.89
 9 0 -17 7.08 2.08
 -9 0 16 59.81 5.88
 -9 0 16 57.49 6.02
 9 0 -16 53.22 6.87
 -9 0 16 76.75 7.52
 9 0 -16 65.37 6.5
 9 0 -16 60.32 5.59
 -9 0 15 48.6 5.85
 -9 0 15 48.41 5.94
 9 0 -15 46.16 7.17
 9 0 -15 47.48 6.65
 -9 0 15 56.01 7.56
 9 0 -15 50.73 5.51
 -9 0 14 43.36 6.08
 9 0 -14 57.2 7.85
 -9 0 14 45.44 6.05
 9 0 -14 56.41 7.33
 -9 0 14 40.97 4.79
 -9 0 14 62.9 8.04
 9 0 -14 46.8 5.48
 9 0 -14 46.07 5.67
 9 0 -13 1.8 3.56
 -9 0 13 2.08 3.96
 9 0 -13 0.52 5.6
 -9 0 13 -0.22 3.61
 -9 0 13 0.45 2.21
 9 0 -13 -2.85 5.54
 -9 0 13 0.59 5.35
 -9 0 13 -0.49 2.42
 -9 0 13 3.47 2.1
 9 0 -12 -2.99 4.4
 9 0 -12 2.82 5.67
 -9 0 12 4.55 4.28
 9 0 -12 0.26 5.34
 -9 0 12 0.87 3.43
 -9 0 12 4.11 4.92
 -9 0 12 3.32 2.49
 -9 0 12 3.79 2.88
 9 0 -11 -3.88 4.9
 9 0 -11 -4.81 4.27
 -9 0 11 -0.2 3.48
 9 0 -11 -1.23 5.09
 -9 0 11 3.38 2.24
 -9 0 11 0.8 2.56
 -9 0 11 0.62 3.07
 -9 0 11 3.65 4.89
 -9 0 11 -0.16 2.34
 9 0 -10 63.75 6.86
 9 0 -10 72.4 8.33
 -9 0 10 69.06 7.54
 -9 0 10 79.69 6.29
 -9 0 10 82.95 7.33
 9 0 -10 74.91 6.41
 -9 0 10 71.56 6.64
 9 0 -10 82.94 8.47
 -9 0 10 74.92 8.41
 -9 0 10 77.82 6.55
 9 0 -10 72.18 7.94
 9 0 -10 71.1 6.77
 9 0 -9 107.85 9.19
 9 0 -9 115.73 10.4
 -9 0 9 123.61 9.67
 9 0 -9 131.2 9.07
 -9 0 9 113.85 8.72
 -9 0 9 113.42 9.08
 -9 0 9 140.06 11.03
 9 0 -9 132.12 10.26
 9 0 -9 117.86 10.01
 9 0 -9 115.34 8.94
 9 0 -9 123.63 8.75
 9 0 -8 7.74 2.96
 9 0 -8 -2.63 4.77
 9 0 -8 -1.85 4.16
 -9 0 8 5.09 2.69
 -9 0 8 2.03 3.11
 9 0 -8 4.39 3.83
 9 0 -8 3.96 3.18
 -9 0 8 3.72 2.55
 9 0 -8 3.35 4.2
 -9 0 8 5.17 3.52
 -9 0 8 3.82 2.17
 -9 0 8 3.14 2.59
 9 0 -8 5.62 2.55
 9 0 -7 79.24 7.57
 9 0 -7 97.04 8.31
 -9 0 7 84.42 7.73
 9 0 -7 93.03 7.55
 -9 0 7 85.25 7.28
 -9 0 7 97.71 8.37
 9 0 -7 90.79 7.93
 -9 0 7 86.54 7.14
 -9 0 7 107.31 7.49
 9 0 -7 86.25 8.21
 -9 0 7 108.46 7.27
 9 0 -7 96.98 7.44
 -9 0 6 35.22 4.18
 9 0 -6 29.86 4.72
 -9 0 6 34.43 4.65
 9 0 -6 31.52 4.64
 9 0 -6 37.72 4.58
 -9 0 6 39.22 3.71
 9 0 -6 32.82 4.71
 -9 0 6 36.27 4.84
 -9 0 6 40.63 4.17
 -9 0 6 44.83 4.13
 9 0 -6 40.48 4.56
 9 0 -5 0.11 2.85
 9 0 -5 0.89 3.19
 -9 0 5 -0.81 1.31
 -9 0 5 1.02 2.58
 9 0 -5 -1.4 2.73
 9 0 -5 1.3 2.86
 -9 0 5 0.68 2.28
 -9 0 5 -0.19 1.78
 9 0 -5 0.77 2.85
 -9 0 5 0.33 2.59
 -9 0 5 0.25 2.12
 -9 0 5 0.23 2
 9 0 -4 33.62 4.33
 9 0 -4 33.33 4.7
 -9 0 4 35.74 3.81
 9 0 -4 37.28 4.2
 -9 0 4 26.64 4.09
 9 0 -4 30.9 4.32
 9 0 -4 28.81 3.98
 -9 0 4 29.75 4.16
 -9 0 4 32.38 3.6
 -9 0 4 37.37 3.99
 9 0 -4 28.16 4.16
 -9 0 4 32.1 3.78
 -9 0 3 67.59 5.78
 9 0 -3 70.55 5.91
 -9 0 3 62.09 5.94
 -9 0 3 60.91 5.47
 -9 0 3 81.86 5.36
 9 0 -3 66.57 5.59
 -9 0 3 61.28 5.74
 9 0 -3 63.51 6.29
 -9 0 3 58.79 5.63
 9 0 -3 57.33 5.94
 9 0 -2 144.35 9.88
 -9 0 2 141.38 10.16
 -9 0 2 138.27 9.75
 -9 0 2 145.92 9.4
 9 0 -2 135.79 9.42
 -9 0 2 132.4 9.96
 9 0 -2 138.99 10.25
 -9 0 2 129.02 9.96
 9 0 -1 263.19 17.39
 9 0 -1 297.46 17.59
 -9 0 1 263.68 17.52
 -9 0 1 268.41 17.33
 9 0 -1 280.32 16.95
 -9 0 1 300.18 18.58
 -9 0 1 282.77 17.04
 9 0 -1 274.25 17.66
 -9 0 1 239.34 17.44
 9 0 -1 267.79 17.38
 9 0 0 406.35 24.79
 -9 0 0 379.61 24.47
 -9 0 0 453.09 25.91
 -9 0 0 396.23 24.69
 9 0 0 392.44 24.21
 -9 0 0 410.61 24.39
 9 0 0 410.59 24.76
 9 0 0 380.77 24.52
 9 0 1 616.37 37.35
 -9 0 -1 616.59 37.3
 -9 0 -1 665.99 38.19
 9 0 1 628.91 36.74
 -9 0 -1 631.14 37.03
 -9 0 -1 633.2 36.43
 9 0 1 612.63 37.04
 9 0 1 589.96 36.92
 9 0 2 694.07 42.05
 9 0 2 727.2 41.19
 -9 0 -2 755.36 42.57
 9 0 2 699.97 41.39
 -9 0 -2 692.66 41.76
 -9 0 -2 698.91 41.03
 9 0 2 663.77 41.32
 -9 0 -3 325.15 20.09
 -9 0 -3 289.81 20.05
 9 0 3 314 18.92
 9 0 3 301.65 18.71
 9 0 3 276.35 19.04
 -9 0 -3 295.47 19.78
 -9 0 -3 276.92 18.75
 9 0 3 325.75 19.36
 -9 0 -4 318.14 22.09
 9 0 4 368.22 21.85
 -9 0 -4 373.75 23.37
 -9 0 -4 362.33 23.03
 9 0 4 374.42 22.24
 9 0 4 363.12 22.11
 -9 0 -4 358.5 23.48
 -9 0 -4 312.84 22.02
 9 0 4 383.65 22.78
 9 0 4 369.66 22.27
 -9 0 -5 327.67 24.05
 -9 0 -5 437.97 26.32
 -9 0 -5 359.97 24.61
 9 0 5 386.34 25.51
 9 0 5 424.52 24.4
 -9 0 -5 388.05 24.67
 9 0 5 393.17 23.79
 9 0 5 396.55 23.9
 9 0 5 383.83 24.13
 9 0 5 394.12 24.69
 -9 0 -5 441.88 26
 -9 0 -6 10.26 4.22
 -9 0 -6 11.5 5.83
 9 0 6 13.35 3.49
 9 0 6 9.59 3.47
 9 0 6 9.12 2.62
 -9 0 -6 10.47 5.98
 9 0 6 12.38 4.07
 -9 0 -7 -0.71 5.19
 9 0 7 0.51 2.23
 -9 0 -7 1.19 6.33
 9 0 7 0.2 3.81
 9 0 7 -0.72 3.35
 -9 0 -8 32.11 5.83
 9 0 8 29.67 5.06
 9 0 8 29.14 4.77
 -9 0 -9 35.04 5.03
 9 0 9 31.89 4.64
 9 0 9 25.15 3.68
 -9 0 -10 28.65 3.78
 9 0 10 30.33 3.93
 -9 0 -10 29.31 4.87
 9 0 11 81.37 6.05
 -9 0 -11 91.99 6.75
 -9 1 17 20.41 3
 9 1 -17 14.43 3.12
 9 1 -17 20.25 3.58
 9 1 -16 29.16 3.56
 -9 1 16 27.9 4.19
 9 1 -16 22.38 4.53
 -9 1 16 26.09 3.66
 9 1 -16 30.87 5.03
 -9 1 16 28.14 4.94
 9 1 -15 17.97 3.9
 -9 1 15 12.8 3.9
 9 1 -15 12.48 4.73
 -9 1 15 12.23 3.35
 -9 1 15 14.95 2.89
 9 1 -15 14.28 5.1
 -9 1 15 16.75 5.07
 9 1 -14 49.07 5.57
 -9 1 14 64.86 6.88
 -9 1 14 57.69 6.04
 9 1 -14 55.74 7.02
 -9 1 14 59.54 5.76
 9 1 -14 59.7 6.94
 9 1 -13 -2.9 4.9
 9 1 -13 -2.49 4.08
 -9 1 13 1.22 4.36
 9 1 -13 0.91 4.46
 -9 1 13 5.17 3.01
 -9 1 13 3.62 2.18
 -9 1 13 2.65 2.95
 9 1 -12 658.46 40.38
 9 1 -12 672.23 41.58
 -9 1 12 612.32 40.67
 9 1 -12 756.04 40.41
 -9 1 12 657.36 39.97
 -9 1 12 700.55 40.81
 9 1 -12 697.63 41.5
 9 1 -12 688.02 41.49
 9 1 -11 14.77 3.5
 -9 1 11 9.05 3.26
 9 1 -11 12.18 5.47
 9 1 -11 11.85 4.69
 -9 1 11 14.55 3.99
 9 1 -11 10.14 4.66
 9 1 -11 16.04 4.12
 -9 1 11 9.64 2.9
 9 1 -11 9.79 4.91
 9 1 -10 66.17 7.33
 9 1 -10 70.16 7.29
 -9 1 10 59.51 6.82
 -9 1 10 60.51 6.23
 -9 1 10 67.29 5.98
 -9 1 10 67.47 6.65
 9 1 -10 72.9 7.8
 9 1 -10 76.52 8.15
 9 1 -9 152.21 11.51
 9 1 -9 144.62 11.5
 -9 1 9 145.97 11.4
 -9 1 9 140.44 10.79
 -9 1 9 167.56 11.12
 -9 1 9 155.23 11.22
 9 1 -9 164.82 11.89
 9 1 -9 171.25 12.44
 9 1 -8 110.51 8.77
 9 1 -8 87.37 8.15
 -9 1 8 101.46 8.35
 -9 1 8 116.36 8.22
 -9 1 8 99.42 8.23
 9 1 -8 97.81 8.59
 -9 1 7 374.06 24.71
 -9 1 7 434.6 24.64
 -9 1 7 402.5 25.15
 9 1 -7 398.44 24.71
 9 1 -7 389.1 25.07
 9 1 -6 27.13 5.02
 9 1 -6 23.71 4.64
 -9 1 6 27.12 3.88
 -9 1 6 24.09 3.77
 -9 1 6 26.63 3.79
 9 1 -6 32.54 4.74
 9 1 -6 28.7 4.29
 -9 1 6 37.85 4.13
 9 1 -5 38.01 5.34
 9 1 -5 51.55 5.56
 -9 1 5 50.94 4.85
 -9 1 5 46.16 4.88
 9 1 -5 64.46 5.93
 -9 1 5 47.64 4.94
 9 1 -5 44.31 4.92
 9 1 -5 59.67 5.54
 -9 1 4 403.93 26.25
 9 1 -4 424.54 26.34
 -9 1 4 397.58 26.31
 9 1 -4 430.85 26.12
 9 1 -4 457.7 26.98
 -9 1 3 255.7 17.7
 9 1 -3 257.16 17.65
 -9 1 3 245.11 17.66
 9 1 -3 289.42 18.19
 -9 1 3 358.16 18.29
 -9 1 3 284.19 18.22
 9 1 -3 284.64 18.15
 -9 1 3 321.58 18.41
 9 1 -3 302.56 18.19
 9 1 -2 104.77 8.74
 -9 1 2 131.48 8.82
 -9 1 2 105.96 8.69
 9 1 -2 119.96 8.77
 -9 1 2 114.56 8.96
 9 1 -2 120.14 8.84
 9 1 -1 72.58 6.7
 -9 1 1 86.92 6.95
 -9 1 1 78.02 6.75
 9 1 -1 69.89 6.41
 9 1 -1 81.29 6.89
 -9 1 0 152.73 11.32
 -9 1 0 164.92 10.89
 -9 1 0 143.38 11.2
 9 1 0 144.73 10.78
 -9 1 -1 223.41 15.53
 -9 1 -1 254.32 15.61
 9 1 1 218.63 15.04
 9 1 2 187.91 12.97
 -9 1 -2 171.81 12.83
 -9 1 -2 189.23 12.89
 9 1 2 161.59 11.98
 -9 1 -3 122.05 10.74
 9 1 3 148.32 11.65
 -9 1 -3 154.42 11.77
 9 1 3 144.67 10.78
 -9 1 -3 158.17 11.62
 -9 1 -3 159.28 11.05
 -9 1 -4 268.75 16.8
 9 1 4 244.69 17.17
 9 1 4 244.93 16.25
 9 1 4 252.87 16.23
 9 1 4 222.99 16.25
 -9 1 -4 227.83 17.2
 -9 1 -4 239.85 16.54
 9 1 4 257.11 16.68
 -9 1 -5 2.03 4.09
 9 1 5 3.01 4.39
 9 1 5 4.58 3.59
 9 1 5 5.12 2.63
 9 1 5 2.64 2.79
 -9 1 -5 3.1 3.81
 -9 1 -6 130.12 11.1
 -9 1 -6 134.02 11.68
 9 1 6 138.72 11.46
 9 1 6 137.36 10.54
 9 1 6 143.39 10.16
 9 1 6 142.59 10.51
 -9 1 -6 124.38 10.83
 -9 1 -7 55.8 7.1
 -9 1 -7 63.55 7.46
 -9 1 -7 61.86 6.95
 9 1 7 66.77 6.76
 9 1 7 70.01 6.14
 9 1 7 61.34 6.3
 -9 1 -7 69.72 9.08
 -9 1 -8 76 7.73
 -9 1 -8 90.28 7.82
 9 1 8 93.21 6.77
 9 1 8 85.13 6.91
 -9 1 -8 83.73 9.17
 9 1 8 81.93 7.55
 -9 1 -8 68.54 7.92
 -9 1 -9 7.72 3.01
 9 1 9 9.48 2.15
 9 1 9 8.49 3.03
 9 1 10 73.04 5.79
 -9 1 -10 72.05 6.66
 -9 1 -11 1.35 2.01
 -9 2 17 27.24 3.05
 9 2 -16 4.52 2.59
 -9 2 16 3.49 2.7
 -9 2 16 4.54 1.87
 -9 2 16 2.49 2.78
 -9 2 16 2.65 1.71
 9 2 -15 45.07 4.84
 -9 2 15 51.82 5
 9 2 -15 63.06 6.51
 -9 2 15 59.07 6.31
 9 2 -15 52.38 5.94
 9 2 -14 45.59 6.24
 9 2 -14 38.81 5.18
 -9 2 14 44.22 4.3
 9 2 -14 30.11 4.78
 -9 2 14 45.09 4.92
 9 2 -14 47.62 6.34
 9 2 -13 70.87 7.16
 9 2 -13 56.49 6.74
 -9 2 13 64.91 7.28
 -9 2 13 76.63 6.35
 -9 2 13 72.07 6.93
 9 2 -13 70.45 7.93
 9 2 -13 82.18 8.46
 9 2 -13 90.59 6.51
 9 2 -12 71.45 7.42
 -9 2 12 55.81 6.78
 -9 2 12 65.11 5.94
 -9 2 12 54.99 6.21
 9 2 -12 73.3 7.77
 -9 2 12 52.34 6.03
 9 2 -12 64.59 8.08
 9 2 -11 148.7 13.54
 9 2 -11 205.56 13.4
 -9 2 11 167.99 12.88
 -9 2 11 190.61 12.53
 -9 2 11 176.29 12.79
 9 2 -11 172.51 13.31
 -9 2 11 151.86 12.29
 9 2 -11 197.94 14.15
 9 2 -10 145.92 13.32
 9 2 -10 211.81 13.73
 -9 2 10 169.6 12.95
 -9 2 10 198.62 12.81
 9 2 -10 184.85 13.32
 -9 2 10 168.51 12.53
 9 2 -9 318.24 23.36
 9 2 -9 439.82 23.85
 -9 2 9 351.23 23.23
 9 2 -9 373.99 23.31
 -9 2 9 334.7 22.72
 9 2 -9 416.86 24.37
 9 2 -8 24.83 5.99
 -9 2 8 16.88 3.7
 -9 2 8 22.84 4.06
 9 2 -8 27.32 4.47
 9 2 -7 94.19 8.04
 -9 2 7 66.28 6.52
 -9 2 7 80.99 7.09
 -9 2 7 78.86 6.97
 9 2 -7 72.32 6.85
 9 2 -7 98.1 8.24
 9 2 -6 3.84 3.98
 9 2 -6 17.74 4.66
 -9 2 6 7.51 2.82
 -9 2 6 6.35 2.88
 9 2 -6 7.63 3.09
 9 2 -5 137.4 9.69
 -9 2 5 101.33 8.63
 -9 2 5 129.96 9.26
 -9 2 5 113.71 9.06
 -9 2 5 148.94 9.71
 9 2 -5 123.38 9.63
 9 2 -4 455.06 26.6
 -9 2 4 460.77 26.64
 -9 2 4 383.17 26.33
 -9 2 4 480.51 27.06
 9 2 -4 423.39 26.73
 9 2 -3 38.47 5.02
 9 2 -3 41.28 5.1
 -9 2 3 51.15 5.05
 9 2 -3 60.06 5.85
 -9 2 3 50.38 5.09
 9 2 -2 28.61 4.17
 9 2 -2 48.92 5.17
 -9 2 2 32.57 4.27
 -9 2 2 38.38 4.46
 9 2 -2 33.13 4.11
 -9 2 2 38.66 4.78
 9 2 -2 45.34 5.16
 9 2 -1 86.01 7.08
 -9 2 1 67.04 6.37
 -9 2 1 89.94 7.42
 -9 2 1 81.72 6.96
 -9 2 1 85.82 7.41
 9 2 -1 80.59 7.1
 9 2 0 67.07 6.5
 -9 2 0 78.89 7.15
 -9 2 0 79.8 7.24
 9 2 0 72.01 6.54
 9 2 1 1688.56 88.95
 -9 2 -1 1554.4 88.6
 -9 2 -1 1803.55 89
 -9 2 -1 1332.56 88.43
 9 2 1 1425.71 87.74
 9 2 2 380.32 23.01
 -9 2 -2 358.5 22.82
 9 2 2 374.39 22.36
 9 2 2 323.47 21.69
 9 2 3 115.83 9.83
 -9 2 -3 108.15 9.75
 9 2 3 125.67 9.32
 9 2 4 10.13 4.24
 -9 2 -4 7.89 4.11
 9 2 4 6.22 3.48
 -9 2 -4 9.03 4.98
 -9 2 -4 5.41 4.19
 -9 2 -5 315.68 18.46
 9 2 5 232.58 17.33
 9 2 5 249.76 17.06
 9 2 5 266.35 17.22
 9 2 5 227.25 16.75
 -9 2 -5 248.74 18.17
 -9 2 -5 267.84 17.82
 9 2 5 263.45 17.47
 -9 2 -6 42.57 6.54
 -9 2 -6 35.74 5.65
 -9 2 -6 47.88 6.19
 9 2 6 42.18 5.68
 9 2 6 39.54 5.28
 9 2 6 36.63 4.97
 9 2 6 46.52 5.52
 -9 2 -6 35.78 6.83
 -9 2 -6 41.84 5.99
 9 2 6 39.55 5.52
 -9 2 -7 105.31 9.18
 -9 2 -7 75.43 7.6
 9 2 7 92.04 7.72
 9 2 7 87.58 7.51
 -9 2 -7 86.61 8.83
 -9 2 -7 74.67 8.13
 9 2 7 88.76 7.83
 -9 2 -7 105.55 8.37
 -9 2 -8 94.59 9.16
 9 2 8 108.17 7.41
 -9 2 -8 110.42 9.39
 9 2 8 98.73 7.93
 9 2 8 110.01 7.96
 9 2 8 100.85 7.99
 -9 2 -8 103.07 9.27
 9 2 8 105.7 8.4
 -9 2 -8 97.78 8.31
 -9 2 -9 15.7 4.49
 9 2 9 12.76 2.39
 -9 2 -9 10.49 3.72
 9 2 9 9.16 2.53
 9 2 9 11.02 2.35
 9 2 9 11.18 2.79
 -9 2 -10 33.17 3.92
 9 2 10 46.88 3.54
 -9 2 -10 36.29 4
 -9 3 16 65.05 5.21
 -9 3 16 59.7 4.76
 9 3 -16 60.73 5.16
 9 3 -16 64.73 5.04
 9 3 -15 12.86 3.55
 9 3 -15 10.84 2.77
 -9 3 15 12.82 2.98
 -9 3 15 12.67 1.99
 -9 3 15 18.71 2.76
 9 3 -15 21.18 3.6
 9 3 -14 9.58 4.22
 9 3 -14 9.58 3.5
 -9 3 14 4.41 2.93
 9 3 -14 11.79 3.12
 -9 3 14 7.86 2.35
 -9 3 14 7.46 2.8
 9 3 -14 13.64 3.91
 9 3 -13 123.36 9.43
 -9 3 13 110.34 9.28
 -9 3 13 129.99 8.94
 -9 3 13 113.66 9.29
 9 3 -13 125.08 9.72
 9 3 -13 116.83 10.15
 9 3 -12 110.13 10.75
 9 3 -12 161.04 10.86
 -9 3 12 130.01 10.27
 -9 3 12 165.5 10.26
 9 3 -12 128.49 10.27
 -9 3 12 110.59 9.47
 9 3 -11 107.37 10.3
 9 3 -11 158.22 10.87
 -9 3 11 114.12 9.69
 -9 3 11 134.14 10.03
 9 3 -11 132.57 9.99
 -9 3 11 102.53 8.98
 9 3 -11 142.74 11.3
 9 3 -10 19.31 5.81
 9 3 -10 33.79 6.54
 -9 3 10 28.91 4.45
 -9 3 10 30.92 4.72
 9 3 -10 28.27 5
 -9 3 10 25.92 3.86
 9 3 -9 8.11 4.77
 9 3 -9 28.87 6.13
 -9 3 9 17.96 3.81
 -9 3 9 17.28 4.05
 9 3 -9 26.76 4.51
 9 3 -8 -2.94 4.33
 9 3 -8 7.65 5.17
 -9 3 8 1.57 2.65
 -9 3 8 1.38 3.1
 9 3 -8 9.96 3.34
 9 3 -7 23.47 4.64
 9 3 -7 41.52 5.87
 -9 3 7 29.75 4.08
 -9 3 7 36.79 4.6
 -9 3 6 98.63 7.85
 -9 3 6 79.22 7.33
 9 3 -6 86.44 8.12
 9 3 -5 290.28 18.2
 -9 3 5 295.19 18.23
 -9 3 5 244.68 17.75
 -9 3 5 313.66 18.58
 9 3 -5 267.12 18.12
 -9 3 4 407.78 23.11
 9 3 -4 401.15 22.84
 -9 3 4 316.27 22.45
 -9 3 4 388.43 23.26
 9 3 -4 343.81 22.69
 9 3 -3 45.02 5.1
 9 3 -3 49.25 5.72
 -9 3 3 40.35 4.97
 -9 3 3 44.38 4.91
 9 3 -2 32.97 4.73
 9 3 -2 22.23 4.17
 -9 3 2 22.8 3.56
 -9 3 2 20.52 3.47
 -9 3 2 25.43 4.4
 9 3 -1 371.25 24.43
 -9 3 1 484.93 25.64
 -9 3 1 360.95 24.52
 -9 3 1 340.84 24.09
 -9 3 1 456.99 25.66
 9 3 -1 459.38 24.93
 9 3 0 386.51 26.12
 -9 3 0 473.51 27.27
 -9 3 0 438.17 27.21
 9 3 0 458.54 26.52
 9 3 1 41.87 5.45
 -9 3 -1 46.8 5.66
 -9 3 -1 51.09 6.3
 -9 3 -1 42.57 5.33
 9 3 1 38.81 4.64
 9 3 2 486.66 29.4
 -9 3 -2 425.26 28.93
 9 3 2 472.61 28.74
 -9 3 -2 509.53 29.68
 9 3 3 136.92 10.34
 9 3 3 132.08 9.79
 -9 3 -3 130.8 10.71
 -9 3 -3 111.87 9.88
 9 3 4 26.25 4.63
 9 3 4 29.86 4.6
 9 3 4 26.45 4.27
 -9 3 -4 24.3 4.47
 -9 3 -4 26.54 5.41
 -9 3 -4 33.56 5.56
 9 3 4 30.06 4.61
 -9 3 -5 26.98 5.8
 9 3 5 19.55 4.07
 9 3 5 20.73 4.07
 9 3 5 30.07 4.58
 9 3 5 18.9 3.69
 -9 3 -5 22.66 5.43
 -9 3 -5 21.9 4.91
 9 3 5 28.81 4.41
 -9 3 -6 27.64 5.4
 9 3 6 19.01 3.61
 9 3 6 21.65 3.9
 9 3 6 24.28 4.09
 9 3 6 27.16 4.42
 -9 3 -6 23.29 5.16
 -9 3 -6 24.89 4.85
 9 3 6 25.91 4.05
 -9 3 -7 83.1 8
 9 3 7 88.1 6.78
 -9 3 -7 81.66 7.8
 9 3 7 84.4 6.99
 -9 3 -7 74.93 7.5
 9 3 7 79.62 6.82
 -9 3 -8 32.66 5.11
 -9 3 -8 26.27 4.37
 9 3 8 32.98 3.8
 9 3 8 31.21 3.79
 -9 3 -8 24.29 4.2
 -9 3 -8 25.51 5.01
 9 3 8 34.98 3.62
 -9 3 -8 28.73 4.49
 -9 3 -9 17.2 3.66
 9 3 9 17.16 1.97
 9 3 9 20.61 2.48
 -9 3 -9 12.6 3.41
 9 3 9 18.03 2.07
 -9 3 -9 15.42 2.85
 -9 4 15 49.28 3.43
 9 4 -15 33.27 3.43
 9 4 -14 151.76 9.95
 -9 4 14 133.68 9.86
 9 4 -14 173.68 9.98
 -9 4 14 161.13 9.79
 -9 4 14 148.45 10.04
 9 4 -14 127.7 9.64
 -9 4 14 197.47 10.44
 9 4 -13 13.38 4.01
 9 4 -13 14.45 3.61
 -9 4 13 12.25 2.71
 -9 4 13 14.5 2.81
 -9 4 13 15.84 2.87
 9 4 -13 13.77 2.9
 9 4 -12 10.29 4.13
 9 4 -12 12.61 4.23
 -9 4 12 7.77 2.74
 -9 4 12 9.96 3.05
 -9 4 12 5.19 2.79
 9 4 -12 6.84 2.79
 -9 4 11 68.82 6.49
 -9 4 11 97.18 7.25
 -9 4 11 82.09 7.05
 9 4 -11 73.95 6.57
 9 4 -11 99.14 8.15
 -9 4 10 52.51 5.66
 -9 4 10 63.24 6.11
 9 4 -10 71.27 7.27
 -9 4 9 219.06 13.42
 9 4 -9 222.83 14.01
 9 4 -8 22.66 4.87
 -9 4 8 14.11 3.41
 -9 4 7 200.67 12.57
 -9 4 7 143.49 11.59
 -9 4 7 178.21 12.3
 9 4 -7 165.45 12.23
 9 4 -6 299.14 17.7
 -9 4 6 299.24 17.83
 -9 4 6 273.5 17.56
 9 4 -6 256.76 17.35
 9 4 -5 286.2 16.56
 -9 4 5 302.37 16.91
 -9 4 5 205.71 15.75
 -9 4 5 254.83 16.52
 9 4 -5 232.99 16.1
 9 4 -4 202.62 13.29
 -9 4 4 195.44 13.46
 -9 4 4 197.36 13.46
 -9 4 3 206.29 13.93
 -9 4 3 182.67 13.66
 -9 4 2 54.86 5.47
 9 4 -2 66.72 6.14
 -9 4 2 72.8 6.83
 9 4 -2 71.34 6.42
 -9 4 1 113.04 8.71
 -9 4 1 95.06 8.35
 9 4 -1 95.49 7.8
 9 4 0 202.94 12.92
 -9 4 0 177.95 12.54
 9 4 1 -0.16 3.03
 -9 4 -1 0.65 2.95
 -9 4 -1 -2.68 4.03
 -9 4 -1 3.36 2.6
 9 4 2 14.92 3.57
 9 4 2 12.56 3.22
 -9 4 -2 14.81 4.25
 -9 4 -2 11.06 3.36
 9 4 3 47.89 5.32
 9 4 3 67.08 5.84
 -9 4 -3 50.31 5.4
 9 4 3 58.05 5.35
 -9 4 -3 60.38 6.42
 9 4 3 66.53 5.71
 9 4 4 99.27 7.58
 9 4 4 87.42 7.13
 -9 4 -4 100.5 8.39
 -9 4 -4 108.21 8.55
 9 4 4 100.78 7.55
 -9 4 -5 36.55 5.5
 9 4 5 31.42 3.68
 9 4 5 28.05 3.92
 -9 4 -5 25.8 4.45
 -9 4 -5 34.57 4.69
 9 4 5 28.61 3.42
 -9 4 -6 5.14 3.79
 9 4 6 5.34 2.01
 9 4 6 6.86 2.63
 9 4 6 5.81 2.46
 -9 4 -6 6.67 3.1
 -9 4 -6 4.65 3.04
 9 4 6 3.59 1.81
 -9 4 -7 114.44 8.16
 -9 4 -7 100.53 7.9
 9 4 7 110.99 7.23
 9 4 7 102.18 7.03
 -9 4 -7 70.73 6.81
 -9 4 -7 98.2 7.52
 -9 4 -7 132.89 8.26
 -9 4 -8 9.62 2.95
 9 4 8 12.43 1.69
 9 4 8 14.51 2
 -9 4 -8 7.61 2.76
 9 4 8 10.29 1.8
 -9 4 -8 8.18 2.42
 9 5 -12 24.29 3.1
 9 5 -12 33.27 3.45
 9 5 -12 39.87 3.53
 -9 5 12 26.45 2.65
 -9 5 12 27.75 2.58
 9 5 -12 34.95 3.33
 9 5 -11 211.85 12.18
 -9 5 11 220.46 12.21
 -9 5 11 156.69 11.55
 -9 5 11 184.23 11.72
 9 5 -11 185.15 12.09
 9 5 -10 -0.21 2.65
 9 5 -10 3.16 3.25
 -9 5 10 3.86 2.58
 -9 5 10 2.84 1.74
 -9 5 10 1.29 1.57
 9 5 -9 50.29 5
 -9 5 9 32.37 3.64
 -9 5 9 47.19 4.56
 -9 5 9 39.36 3.79
 9 5 -9 40.97 4.49
 9 5 -8 17.61 3.44
 -9 5 8 18.76 3.37
 -9 5 8 14.17 2.46
 9 5 -7 12.02 3.6
 -9 5 7 12.57 3.09
 9 5 -6 34.45 4.41
 -9 5 6 34.78 4.17
 9 5 -5 15.3 3.11
 -9 5 5 13.4 3.02
 9 5 -5 15.53 3.72
 9 5 -4 79.07 6.48
 -9 5 4 65.09 5.94
 9 5 -3 49.72 4.88
 -9 5 3 55.68 5.59
 9 5 -3 60.51 5.49
 -9 5 2 47.2 5.14
 -9 5 2 41.19 4.74
 9 5 -2 50.19 4.63
 9 5 -1 9.96 2.72
 -9 5 1 9.54 3.01
 -9 5 1 10.24 2.63
 9 5 0 5.31 2.36
 -9 5 0 6.29 3.3
 -9 5 0 5.09 2.6
 -9 5 -1 24.2 3.29
 9 5 1 25.57 3.1
 -9 5 -1 31.9 4.2
 9 5 2 28.68 3.13
 -9 5 -2 28.51 3.94
 9 5 3 27.79 2.89
 9 5 3 32.86 3.43
 -9 5 -3 29.67 3.84
 -9 5 -3 36.2 4.16
 -9 5 -4 118.12 7.97
 9 5 4 109.28 6.81
 -9 5 -4 99.75 7.22
 -9 5 -5 21.97 3.45
 9 5 5 18.51 2.31
 9 5 5 16.46 2.05
 -9 5 -5 21 2.79
 -9 5 -6 13.41 2.38
 -9 5 -6 8.9 2.55
 9 5 6 11.4 1.65
 -9 5 -6 8.44 2.42
 -9 5 -6 9.38 2.36
 9 6 -9 18.05 2.13
 -9 6 8 29.9 2.71
[truncated: 152,440 more chars]
