# Supplementary material for: Novel Antimicrobial Compounds as Ophiobolin-Type Sesterterpenes and Pimarane-Type Diterpene From Bipolaris Species TJ403-B1
Source: Front Microbiol. 2020 May 29;11:856. doi: 10.3389/fmicb.2020.00856 (PMC7273749; doi:10.3389/fmicb.2020.00856)
Supplement: DATA SHEET S4 — X-ray crystallographic data (CIFs) of 1, 4, and 8. [file Data_Sheet_4.ZIP › 8.cif]

 
data_cu_180518D_0m 
  
_audit_creation_method            'SHELXL-2014/7' 
_shelx_SHELXL_version_number      '2014/7' 
_chemical_name_systematic         ? 
_chemical_name_common             ? 
_chemical_melting_point           ? 
_chemical_formula_moiety          ? 
_chemical_formula_sum 
 'C25 H36 O4' 
_chemical_formula_weight          400.54 
  
loop_ 
 _atom_type_symbol 
 _atom_type_description 
 _atom_type_scat_dispersion_real 
 _atom_type_scat_dispersion_imag 
 _atom_type_scat_source 
 'C'  'C'   0.0181   0.0091 
 'International Tables Vol C Tables 4.2.6.8 and 6.1.1.4' 
 'H'  'H'   0.0000   0.0000 
 'International Tables Vol C Tables 4.2.6.8 and 6.1.1.4' 
 'O'  'O'   0.0492   0.0322 
 'International Tables Vol C Tables 4.2.6.8 and 6.1.1.4' 
  
_space_group_crystal_system       monoclinic 
_space_group_IT_number            4 
_space_group_name_H-M_alt         'P 21' 
_space_group_name_Hall            'P 2yb' 
  
_shelx_space_group_comment 
; 
The symmetry employed for this shelxl refinement is uniquely defined 
by the following loop, which should always be used as a source of 
symmetry information in preference to the above space-group names. 
They are only intended as comments. 
; 
  
loop_ 
 _space_group_symop_operation_xyz 
 'x, y, z' 
 '-x, y+1/2, -z' 
  
_cell_length_a                    11.94134(9) 
_cell_length_b                    6.14791(4) 
_cell_length_c                    15.49296(12) 
_cell_angle_alpha                 90 
_cell_angle_beta                  101.4154(7) 
_cell_angle_gamma                 90 
_cell_volume                      1114.904(15) 
_cell_formula_units_Z             2 
_cell_measurement_temperature     100(2) 
_cell_measurement_reflns_used     1289 
_cell_measurement_theta_min       2.88 
_cell_measurement_theta_max       51.76 
  
_exptl_crystal_description        block 
_exptl_crystal_colour             colorless
_exptl_crystal_density_meas       ?
_exptl_crystal_density_method     ? 
_exptl_crystal_density_diffrn     1.193 
_exptl_crystal_F_000              436 
_exptl_transmission_factor_min    ? 
_exptl_transmission_factor_max    ? 
_exptl_crystal_size_max           0.250 
_exptl_crystal_size_mid           0.100 
_exptl_crystal_size_min           0.050 
_exptl_absorpt_coefficient_mu     0.626 
_shelx_estimated_absorpt_T_min    0.859 
_shelx_estimated_absorpt_T_max    0.969 
_exptl_absorpt_correction_type    none 
_exptl_absorpt_correction_T_min   ? 
_exptl_absorpt_correction_T_max   ? 
_exptl_absorpt_process_details    ? 
_exptl_absorpt_special_details    ? 
_diffrn_ambient_temperature       100(2) 
_diffrn_radiation_wavelength      1.54184 
_diffrn_radiation_type            CuK\a 
_diffrn_source                    ? 
_diffrn_measurement_device_type   'Bruker APEX-II CCD' 
_diffrn_measurement_method        '\f and \w scans' 
_diffrn_detector_area_resol_mean  ? 
_diffrn_reflns_number             23169 
_diffrn_reflns_av_unetI/netI      0.0231 
_diffrn_reflns_av_R_equivalents   0.0341 
_diffrn_reflns_limit_h_min        -14 
_diffrn_reflns_limit_h_max        14 
_diffrn_reflns_limit_k_min        -7 
_diffrn_reflns_limit_k_max        7 
_diffrn_reflns_limit_l_min        -19 
_diffrn_reflns_limit_l_max        19 
_diffrn_reflns_theta_min          2.910 
_diffrn_reflns_theta_max          73.779 
_diffrn_reflns_theta_full         67.684 
_diffrn_measured_fraction_theta_max   0.995 
_diffrn_measured_fraction_theta_full  1.000 
_diffrn_reflns_Laue_measured_fraction_max    0.995 
_diffrn_reflns_Laue_measured_fraction_full   1.000 
_diffrn_reflns_point_group_measured_fraction_max   0.984 
_diffrn_reflns_point_group_measured_fraction_full  0.999 
_reflns_number_total              4453 
_reflns_number_gt                 4327 
_reflns_threshold_expression      'I > 2\s(I)' 
_reflns_Friedel_coverage          0.804 
_reflns_Friedel_fraction_max      0.971 
_reflns_Friedel_fraction_full     0.998 
  
_reflns_special_details 
; 
 Reflections were merged by SHELXL according to the crystal 
 class for the calculation of statistics and refinement. 
  
 _reflns_Friedel_fraction is defined as the number of unique 
 Friedel pairs measured divided by the number that would be 
 possible theoretically, ignoring centric projections and 
 systematic absences. 
; 
  
_computing_data_collection        'Bruker APEX2' 
_computing_cell_refinement        'Bruker SAINT' 
_computing_data_reduction         'Bruker SAINT' 
_computing_structure_solution     'SHELXS-97 (Sheldrick, 2008)' 
_computing_structure_refinement 'SHELXL-2014/7 (Sheldrick, 2014)' 
_computing_molecular_graphics     'Bruker SHELXTL' 
_computing_publication_material   'Bruker SHELXTL' 
_refine_special_details           ? 
_refine_ls_structure_factor_coef  Fsqd 
_refine_ls_matrix_type            full 
_refine_ls_weighting_scheme       calc 
_refine_ls_weighting_details 
'w=1/[\s^2^(Fo^2^)+(0.0439P)^2^+0.1979P] where P=(Fo^2^+2Fc^2^)/3' 
_atom_sites_solution_primary      ? 
_atom_sites_solution_secondary    ? 
_atom_sites_solution_hydrogens    geom 
_refine_ls_hydrogen_treatment     constr 
_refine_ls_extinction_method      none 
_refine_ls_extinction_coef        . 
_refine_ls_abs_structure_details 
; 
 Flack x determined using 1885 quotients [(I+)-(I-)]/[(I+)+(I-)] 
 (Parsons, Flack and Wagner, Acta Cryst. B69 (2013) 249-259). 
; 
_refine_ls_abs_structure_Flack    -0.16(6) 
_chemical_absolute_configuration  ad
_refine_ls_number_reflns          4453 
_refine_ls_number_parameters      268 
_refine_ls_number_restraints      1 
_refine_ls_R_factor_all           0.0301 
_refine_ls_R_factor_gt            0.0291 
_refine_ls_wR_factor_ref          0.0772 
_refine_ls_wR_factor_gt           0.0765 
_refine_ls_goodness_of_fit_ref    1.026 
_refine_ls_restrained_S_all       1.026 
_refine_ls_shift/su_max           0.000 
_refine_ls_shift/su_mean          0.000 
  
loop_ 
 _atom_site_label 
 _atom_site_type_symbol 
 _atom_site_fract_x 
 _atom_site_fract_y 
 _atom_site_fract_z 
 _atom_site_U_iso_or_equiv 
 _atom_site_adp_type 
 _atom_site_occupancy 
 _atom_site_site_symmetry_order 
 _atom_site_calc_flag 
 _atom_site_refinement_flags_posn 
 _atom_site_refinement_flags_adp 
 _atom_site_refinement_flags_occupancy 
 _atom_site_disorder_assembly 
 _atom_site_disorder_group 
C1 C 0.27236(13) 0.6438(3) 0.73929(11) 0.0200(3) Uani 1 1 d . . . . . 
H1A H 0.2795 0.4981 0.7671 0.024 Uiso 1 1 calc R U . . . 
H1B H 0.2139 0.7246 0.7636 0.024 Uiso 1 1 calc R U . . . 
C2 C 0.22691(13) 0.6129(3) 0.64027(11) 0.0188(3) Uani 1 1 d . . . . . 
H2 H 0.2155 0.7594 0.6119 0.023 Uiso 1 1 calc R U . . . 
C3 C 0.11410(14) 0.4911(3) 0.62081(11) 0.0221(4) Uani 1 1 d . . . . . 
C4 C 0.11545(15) 0.3241(3) 0.56551(12) 0.0252(4) Uani 1 1 d . . . . . 
H4 H 0.0529 0.2292 0.5457 0.030 Uiso 1 1 calc R U . . . 
C5 C 0.22635(14) 0.3081(3) 0.53993(11) 0.0214(3) Uani 1 1 d . . . . . 
C6 C 0.30501(14) 0.4772(3) 0.59256(10) 0.0186(3) Uani 1 1 d . . . . . 
H6 H 0.3589 0.3961 0.6392 0.022 Uiso 1 1 calc R U . . . 
C7 C 0.37750(14) 0.6093(3) 0.54237(11) 0.0189(3) Uani 1 1 d . . . . . 
C8 C 0.47755(14) 0.6981(3) 0.57930(11) 0.0205(3) Uani 1 1 d . . . . . 
H8 H 0.5118 0.7815 0.5399 0.025 Uiso 1 1 calc R U . . . 
C9 C 0.54616(14) 0.6906(3) 0.67210(10) 0.0209(3) Uani 1 1 d . . . . . 
H9A H 0.5799 0.8369 0.6853 0.025 Uiso 1 1 calc R U . . . 
H9B H 0.6106 0.5894 0.6718 0.025 Uiso 1 1 calc R U . . . 
C10 C 0.49196(13) 0.6260(3) 0.75025(10) 0.0182(3) Uani 1 1 d . . . . . 
H10 H 0.4629 0.4743 0.7380 0.022 Uiso 1 1 calc R U . . . 
C11 C 0.38799(14) 0.7631(3) 0.76857(10) 0.0187(3) Uani 1 1 d . . . . . 
C12 C 0.41136(14) 0.7786(3) 0.87114(11) 0.0239(4) Uani 1 1 d . . . . . 
H12A H 0.4420 0.9237 0.8910 0.029 Uiso 1 1 calc R U . . . 
H12B H 0.3402 0.7538 0.8933 0.029 Uiso 1 1 calc R U . . . 
C13 C 0.49849(15) 0.6023(3) 0.90411(11) 0.0239(4) Uani 1 1 d . . . . . 
H13A H 0.4618 0.4575 0.9021 0.029 Uiso 1 1 calc R U . . . 
H13B H 0.5392 0.6324 0.9651 0.029 Uiso 1 1 calc R U . . . 
C14 C 0.57950(14) 0.6157(3) 0.83933(10) 0.0199(3) Uani 1 1 d . . . . . 
C15 C 0.66924(14) 0.8023(3) 0.85695(11) 0.0213(3) Uani 1 1 d . . . . . 
H15 H 0.6437 0.9253 0.8155 0.026 Uiso 1 1 calc R U . . . 
C16 C 0.77559(14) 0.6945(3) 0.83327(11) 0.0234(4) Uani 1 1 d . . . . . 
H16A H 0.7750 0.7070 0.7695 0.028 Uiso 1 1 calc R U . . . 
H16B H 0.8467 0.7604 0.8668 0.028 Uiso 1 1 calc R U . . . 
C17 C 0.76429(14) 0.4581(3) 0.85993(11) 0.0227(4) Uani 1 1 d . . . . . 
H17 H 0.7940 0.4410 0.9246 0.027 Uiso 1 1 calc R U . . . 
C18 C 0.82204(14) 0.2988(3) 0.81025(12) 0.0239(4) Uani 1 1 d . . . . . 
H18 H 0.7770 0.2389 0.7582 0.029 Uiso 1 1 calc R U . . . 
C19 C 0.92993(15) 0.2326(3) 0.83149(12) 0.0262(4) Uani 1 1 d . . . . . 
C20 C 0.01596(15) 0.5642(3) 0.65954(13) 0.0284(4) Uani 1 1 d . . . . . 
H20A H -0.0504 0.4717 0.6377 0.043 Uiso 1 1 calc R U . . . 
H20B H -0.0026 0.7155 0.6426 0.043 Uiso 1 1 calc R U . . . 
H20C H 0.0363 0.5536 0.7239 0.043 Uiso 1 1 calc R U . . . 
C21 C 0.32841(15) 0.6514(3) 0.44655(11) 0.0227(4) Uani 1 1 d . . . . . 
H21A H 0.3811 0.7464 0.4218 0.027 Uiso 1 1 calc R U . . . 
H21B H 0.3215 0.5119 0.4140 0.027 Uiso 1 1 calc R U . . . 
C22 C 0.38115(15) 0.9918(3) 0.72906(12) 0.0235(4) Uani 1 1 d . . . . . 
H22A H 0.3685 0.9816 0.6647 0.035 Uiso 1 1 calc R U . . . 
H22B H 0.4529 1.0692 0.7511 0.035 Uiso 1 1 calc R U . . . 
H22C H 0.3177 1.0712 0.7461 0.035 Uiso 1 1 calc R U . . . 
C23 C 0.69619(16) 0.8885(4) 0.95137(12) 0.0283(4) Uani 1 1 d . . . . . 
H23A H 0.7209 0.7680 0.9921 0.042 Uiso 1 1 calc R U . . . 
H23B H 0.6276 0.9557 0.9655 0.042 Uiso 1 1 calc R U . . . 
H23C H 0.7573 0.9971 0.9570 0.042 Uiso 1 1 calc R U . . . 
C24 C 1.01353(18) 0.3051(5) 0.91210(14) 0.0406(5) Uani 1 1 d . . . . . 
H24A H 1.0648 0.4152 0.8955 0.061 Uiso 1 1 calc R U . . . 
H24B H 1.0585 0.1800 0.9386 0.061 Uiso 1 1 calc R U . . . 
H24C H 0.9719 0.3673 0.9547 0.061 Uiso 1 1 calc R U . . . 
C25 C 0.98081(16) 0.0814(4) 0.77303(13) 0.0312(4) Uani 1 1 d . . . . . 
H25A H 1.0450 0.1574 0.7541 0.037 Uiso 1 1 calc R U . . . 
H25B H 1.0130 -0.0462 0.8084 0.037 Uiso 1 1 calc R U . . . 
O1 O 0.21816(10) 0.7531(2) 0.43469(8) 0.0251(3) Uani 1 1 d . . . . . 
H1 H 0.2256 0.8815 0.4534 0.038 Uiso 1 1 calc R U . . . 
O2 O 0.25624(11) 0.1778(2) 0.48937(8) 0.0271(3) Uani 1 1 d . . . . . 
O3 O 0.64360(10) 0.4158(2) 0.84001(9) 0.0239(3) Uani 1 1 d . . . . . 
O4 O 0.90539(13) 0.0060(3) 0.69747(9) 0.0355(3) Uani 1 1 d . . . . . 
H4A H 0.8859 0.1101 0.6626 0.053 Uiso 1 1 calc R U . . . 
  
loop_ 
 _atom_site_aniso_label 
 _atom_site_aniso_U_11 
 _atom_site_aniso_U_22 
 _atom_site_aniso_U_33 
 _atom_site_aniso_U_23 
 _atom_site_aniso_U_13 
 _atom_site_aniso_U_12 
C1 0.0177(7) 0.0204(8) 0.0222(8) -0.0007(6) 0.0048(6) 0.0002(6) 
C2 0.0173(7) 0.0161(8) 0.0224(8) -0.0005(7) 0.0024(6) 0.0009(6) 
C3 0.0184(8) 0.0232(8) 0.0234(8) 0.0033(7) 0.0010(6) -0.0003(7) 
C4 0.0205(8) 0.0240(9) 0.0296(9) -0.0012(7) 0.0009(7) -0.0042(7) 
C5 0.0233(8) 0.0166(8) 0.0226(8) 0.0001(7) 0.0003(6) 0.0004(7) 
C6 0.0187(8) 0.0163(8) 0.0194(8) -0.0009(6) 0.0006(6) 0.0003(6) 
C7 0.0210(7) 0.0161(8) 0.0195(7) -0.0015(6) 0.0041(6) 0.0016(7) 
C8 0.0228(8) 0.0204(8) 0.0193(8) 0.0011(6) 0.0064(6) -0.0007(7) 
C9 0.0187(7) 0.0238(9) 0.0201(8) -0.0004(6) 0.0038(6) -0.0025(7) 
C10 0.0176(7) 0.0173(8) 0.0192(8) -0.0003(6) 0.0022(6) -0.0002(6) 
C11 0.0188(7) 0.0180(8) 0.0186(8) -0.0010(6) 0.0022(6) 0.0005(6) 
C12 0.0214(8) 0.0302(9) 0.0201(8) -0.0027(7) 0.0042(6) 0.0017(7) 
C13 0.0217(8) 0.0309(9) 0.0185(8) 0.0034(7) 0.0027(6) -0.0010(7) 
C14 0.0188(7) 0.0192(8) 0.0208(8) 0.0023(7) 0.0020(6) 0.0015(7) 
C15 0.0196(8) 0.0226(8) 0.0202(8) -0.0001(7) 0.0005(6) -0.0007(7) 
C16 0.0188(8) 0.0259(9) 0.0246(8) -0.0014(7) 0.0020(6) -0.0018(7) 
C17 0.0167(7) 0.0272(9) 0.0227(8) 0.0018(7) 0.0003(6) 0.0013(7) 
C18 0.0219(8) 0.0243(9) 0.0238(8) 0.0017(7) 0.0007(6) -0.0003(7) 
C19 0.0241(9) 0.0267(10) 0.0268(9) 0.0050(7) 0.0022(7) 0.0034(7) 
C20 0.0188(8) 0.0340(11) 0.0320(10) -0.0041(8) 0.0042(7) -0.0015(8) 
C21 0.0238(8) 0.0222(9) 0.0215(8) -0.0002(7) 0.0032(6) 0.0020(7) 
C22 0.0242(8) 0.0179(8) 0.0270(8) -0.0017(7) 0.0020(7) -0.0001(7) 
C23 0.0247(8) 0.0332(10) 0.0253(9) -0.0061(8) 0.0013(7) -0.0020(8) 
C24 0.0250(9) 0.0568(14) 0.0355(11) -0.0028(10) -0.0045(8) 0.0087(10) 
C25 0.0285(9) 0.0325(11) 0.0317(10) 0.0057(8) 0.0038(7) 0.0092(8) 
O1 0.0251(6) 0.0206(7) 0.0263(6) -0.0025(5) -0.0027(5) 0.0036(5) 
O2 0.0295(6) 0.0203(6) 0.0301(7) -0.0066(5) 0.0022(5) 0.0008(5) 
O3 0.0171(6) 0.0204(6) 0.0331(7) 0.0044(5) 0.0021(5) 0.0026(5) 
O4 0.0436(8) 0.0282(7) 0.0318(7) 0.0005(6) 0.0007(6) 0.0096(6) 
  
_geom_special_details 
; 
 All esds (except the esd in the dihedral angle between two l.s. planes) 
 are estimated using the full covariance matrix.  The cell esds are taken 
 into account individually in the estimation of esds in distances, angles 
 and torsion angles; correlations between esds in cell parameters are only 
 used when they are defined by crystal symmetry.  An approximate (isotropic) 
 treatment of cell esds is used for estimating esds involving l.s. planes. 
; 
  
loop_ 
 _geom_bond_atom_site_label_1 
 _geom_bond_atom_site_label_2 
 _geom_bond_distance 
 _geom_bond_site_symmetry_2 
 _geom_bond_publ_flag 
C1 C2 1.535(2) . ? 
C1 C11 1.550(2) . ? 
C1 H1A 0.9900 . ? 
C1 H1B 0.9900 . ? 
C2 C3 1.518(2) . ? 
C2 C6 1.544(2) . ? 
C2 H2 1.0000 . ? 
C3 C4 1.339(3) . ? 
C3 C20 1.488(2) . ? 
C4 C5 1.459(2) . ? 
C4 H4 0.9500 . ? 
C5 O2 1.222(2) . ? 
C5 C6 1.524(2) . ? 
C6 C7 1.510(2) . ? 
C6 H6 1.0000 . ? 
C7 C8 1.335(2) . ? 
C7 C21 1.507(2) . ? 
C8 C9 1.508(2) . ? 
C8 H8 0.9500 . ? 
C9 C10 1.534(2) . ? 
C9 H9A 0.9900 . ? 
C9 H9B 0.9900 . ? 
C10 C14 1.559(2) . ? 
C10 C11 1.572(2) . ? 
C10 H10 1.0000 . ? 
C11 C22 1.529(2) . ? 
C11 C12 1.561(2) . ? 
C12 C13 1.519(3) . ? 
C12 H12A 0.9900 . ? 
C12 H12B 0.9900 . ? 
C13 C14 1.528(2) . ? 
C13 H13A 0.9900 . ? 
C13 H13B 0.9900 . ? 
C14 O3 1.447(2) . ? 
C14 C15 1.557(2) . ? 
C15 C23 1.529(2) . ? 
C15 C16 1.540(2) . ? 
C15 H15 1.0000 . ? 
C16 C17 1.524(3) . ? 
C16 H16A 0.9900 . ? 
C16 H16B 0.9900 . ? 
C17 O3 1.437(2) . ? 
C17 C18 1.496(3) . ? 
C17 H17 1.0000 . ? 
C18 C19 1.329(2) . ? 
C18 H18 0.9500 . ? 
C19 C24 1.504(3) . ? 
C19 C25 1.507(3) . ? 
C20 H20A 0.9800 . ? 
C20 H20B 0.9800 . ? 
C20 H20C 0.9800 . ? 
C21 O1 1.436(2) . ? 
C21 H21A 0.9900 . ? 
C21 H21B 0.9900 . ? 
C22 H22A 0.9800 . ? 
C22 H22B 0.9800 . ? 
C22 H22C 0.9800 . ? 
C23 H23A 0.9800 . ? 
C23 H23B 0.9800 . ? 
C23 H23C 0.9800 . ? 
C24 H24A 0.9800 . ? 
C24 H24B 0.9800 . ? 
C24 H24C 0.9800 . ? 
C25 O4 1.407(2) . ? 
C25 H25A 0.9900 . ? 
C25 H25B 0.9900 . ? 
O1 H1 0.8400 . ? 
O4 H4A 0.8400 . ? 
  
loop_ 
 _geom_angle_atom_site_label_1 
 _geom_angle_atom_site_label_2 
 _geom_angle_atom_site_label_3 
 _geom_angle 
 _geom_angle_site_symmetry_1 
 _geom_angle_site_symmetry_3 
 _geom_angle_publ_flag 
C2 C1 C11 118.00(13) . . ? 
C2 C1 H1A 107.8 . . ? 
C11 C1 H1A 107.8 . . ? 
C2 C1 H1B 107.8 . . ? 
C11 C1 H1B 107.8 . . ? 
H1A C1 H1B 107.1 . . ? 
C3 C2 C1 112.58(13) . . ? 
C3 C2 C6 103.58(14) . . ? 
C1 C2 C6 114.70(13) . . ? 
C3 C2 H2 108.6 . . ? 
C1 C2 H2 108.6 . . ? 
C6 C2 H2 108.6 . . ? 
C4 C3 C20 126.85(16) . . ? 
C4 C3 C2 112.48(15) . . ? 
C20 C3 C2 120.64(16) . . ? 
C3 C4 C5 110.60(16) . . ? 
C3 C4 H4 124.7 . . ? 
C5 C4 H4 124.7 . . ? 
O2 C5 C4 127.89(16) . . ? 
O2 C5 C6 124.23(16) . . ? 
C4 C5 C6 107.77(14) . . ? 
C7 C6 C5 116.52(14) . . ? 
C7 C6 C2 114.71(14) . . ? 
C5 C6 C2 104.93(13) . . ? 
C7 C6 H6 106.7 . . ? 
C5 C6 H6 106.7 . . ? 
C2 C6 H6 106.7 . . ? 
C8 C7 C21 119.51(15) . . ? 
C8 C7 C6 123.71(15) . . ? 
C21 C7 C6 116.67(14) . . ? 
C7 C8 C9 131.85(16) . . ? 
C7 C8 H8 114.1 . . ? 
C9 C8 H8 114.1 . . ? 
C8 C9 C10 121.73(14) . . ? 
C8 C9 H9A 106.9 . . ? 
C10 C9 H9A 106.9 . . ? 
C8 C9 H9B 106.9 . . ? 
C10 C9 H9B 106.9 . . ? 
H9A C9 H9B 106.7 . . ? 
C9 C10 C14 113.29(13) . . ? 
C9 C10 C11 118.37(14) . . ? 
C14 C10 C11 106.08(12) . . ? 
C9 C10 H10 106.1 . . ? 
C14 C10 H10 106.1 . . ? 
C11 C10 H10 106.1 . . ? 
C22 C11 C1 110.12(13) . . ? 
C22 C11 C12 109.63(14) . . ? 
C1 C11 C12 107.22(13) . . ? 
C22 C11 C10 113.72(14) . . ? 
C1 C11 C10 112.53(13) . . ? 
C12 C11 C10 103.18(12) . . ? 
C13 C12 C11 105.74(14) . . ? 
C13 C12 H12A 110.6 . . ? 
C11 C12 H12A 110.6 . . ? 
C13 C12 H12B 110.6 . . ? 
C11 C12 H12B 110.6 . . ? 
H12A C12 H12B 108.7 . . ? 
C12 C13 C14 102.79(14) . . ? 
C12 C13 H13A 111.2 . . ? 
C14 C13 H13A 111.2 . . ? 
C12 C13 H13B 111.2 . . ? 
C14 C13 H13B 111.2 . . ? 
H13A C13 H13B 109.1 . . ? 
O3 C14 C13 110.63(14) . . ? 
O3 C14 C15 106.26(12) . . ? 
C13 C14 C15 115.33(14) . . ? 
O3 C14 C10 107.57(13) . . ? 
C13 C14 C10 100.54(12) . . ? 
C15 C14 C10 116.30(13) . . ? 
C23 C15 C16 110.47(14) . . ? 
C23 C15 C14 115.49(15) . . ? 
C16 C15 C14 102.26(14) . . ? 
C23 C15 H15 109.4 . . ? 
C16 C15 H15 109.4 . . ? 
C14 C15 H15 109.4 . . ? 
C17 C16 C15 102.98(14) . . ? 
C17 C16 H16A 111.2 . . ? 
C15 C16 H16A 111.2 . . ? 
C17 C16 H16B 111.2 . . ? 
C15 C16 H16B 111.2 . . ? 
H16A C16 H16B 109.1 . . ? 
O3 C17 C18 108.42(14) . . ? 
O3 C17 C16 104.67(14) . . ? 
C18 C17 C16 114.23(15) . . ? 
O3 C17 H17 109.8 . . ? 
C18 C17 H17 109.8 . . ? 
C16 C17 H17 109.8 . . ? 
C19 C18 C17 126.61(16) . . ? 
C19 C18 H18 116.7 . . ? 
C17 C18 H18 116.7 . . ? 
C18 C19 C24 124.50(18) . . ? 
C18 C19 C25 121.77(17) . . ? 
C24 C19 C25 113.68(16) . . ? 
C3 C20 H20A 109.5 . . ? 
C3 C20 H20B 109.5 . . ? 
H20A C20 H20B 109.5 . . ? 
C3 C20 H20C 109.5 . . ? 
H20A C20 H20C 109.5 . . ? 
H20B C20 H20C 109.5 . . ? 
O1 C21 C7 111.65(14) . . ? 
O1 C21 H21A 109.3 . . ? 
C7 C21 H21A 109.3 . . ? 
O1 C21 H21B 109.3 . . ? 
C7 C21 H21B 109.3 . . ? 
H21A C21 H21B 108.0 . . ? 
C11 C22 H22A 109.5 . . ? 
C11 C22 H22B 109.5 . . ? 
H22A C22 H22B 109.5 . . ? 
C11 C22 H22C 109.5 . . ? 
H22A C22 H22C 109.5 . . ? 
H22B C22 H22C 109.5 . . ? 
C15 C23 H23A 109.5 . . ? 
C15 C23 H23B 109.5 . . ? 
H23A C23 H23B 109.5 . . ? 
C15 C23 H23C 109.5 . . ? 
H23A C23 H23C 109.5 . . ? 
H23B C23 H23C 109.5 . . ? 
C19 C24 H24A 109.5 . . ? 
C19 C24 H24B 109.5 . . ? 
H24A C24 H24B 109.5 . . ? 
C19 C24 H24C 109.5 . . ? 
H24A C24 H24C 109.5 . . ? 
H24B C24 H24C 109.5 . . ? 
O4 C25 C19 115.81(16) . . ? 
O4 C25 H25A 108.3 . . ? 
C19 C25 H25A 108.3 . . ? 
O4 C25 H25B 108.3 . . ? 
C19 C25 H25B 108.3 . . ? 
H25A C25 H25B 107.4 . . ? 
C21 O1 H1 109.5 . . ? 
C17 O3 C14 110.76(13) . . ? 
C25 O4 H4A 109.5 . . ? 
  
loop_ 
 _geom_torsion_atom_site_label_1 
 _geom_torsion_atom_site_label_2 
 _geom_torsion_atom_site_label_3 
 _geom_torsion_atom_site_label_4 
 _geom_torsion 
 _geom_torsion_site_symmetry_1 
 _geom_torsion_site_symmetry_2 
 _geom_torsion_site_symmetry_3 
 _geom_torsion_site_symmetry_4 
 _geom_torsion_publ_flag 
C11 C1 C2 C3 179.18(14) . . . . ? 
C11 C1 C2 C6 61.1(2) . . . . ? 
C1 C2 C3 C4 -129.36(17) . . . . ? 
C6 C2 C3 C4 -4.89(19) . . . . ? 
C1 C2 C3 C20 52.3(2) . . . . ? 
C6 C2 C3 C20 176.81(15) . . . . ? 
C20 C3 C4 C5 178.18(17) . . . . ? 
C2 C3 C4 C5 0.0(2) . . . . ? 
C3 C4 C5 O2 -178.59(18) . . . . ? 
C3 C4 C5 C6 5.0(2) . . . . ? 
O2 C5 C6 C7 47.6(2) . . . . ? 
C4 C5 C6 C7 -135.82(15) . . . . ? 
O2 C5 C6 C2 175.70(16) . . . . ? 
C4 C5 C6 C2 -7.76(18) . . . . ? 
C3 C2 C6 C7 136.57(14) . . . . ? 
C1 C2 C6 C7 -100.34(16) . . . . ? 
C3 C2 C6 C5 7.42(16) . . . . ? 
C1 C2 C6 C5 130.50(14) . . . . ? 
C5 C6 C7 C8 -153.27(17) . . . . ? 
C2 C6 C7 C8 83.6(2) . . . . ? 
C5 C6 C7 C21 30.5(2) . . . . ? 
C2 C6 C7 C21 -92.61(17) . . . . ? 
C21 C7 C8 C9 178.49(17) . . . . ? 
C6 C7 C8 C9 2.4(3) . . . . ? 
C7 C8 C9 C10 -18.6(3) . . . . ? 
C8 C9 C10 C14 176.62(15) . . . . ? 
C8 C9 C10 C11 -58.3(2) . . . . ? 
C2 C1 C11 C22 58.92(19) . . . . ? 
C2 C1 C11 C12 178.14(14) . . . . ? 
C2 C1 C11 C10 -69.09(18) . . . . ? 
C9 C10 C11 C22 -21.8(2) . . . . ? 
C14 C10 C11 C22 106.74(15) . . . . ? 
C9 C10 C11 C1 104.26(16) . . . . ? 
C14 C10 C11 C1 -127.17(14) . . . . ? 
C9 C10 C11 C12 -140.50(15) . . . . ? 
C14 C10 C11 C12 -11.93(16) . . . . ? 
C22 C11 C12 C13 -138.42(15) . . . . ? 
C1 C11 C12 C13 102.05(15) . . . . ? 
C10 C11 C12 C13 -16.94(17) . . . . ? 
C11 C12 C13 C14 40.22(17) . . . . ? 
C12 C13 C14 O3 -159.82(14) . . . . ? 
C12 C13 C14 C15 79.57(16) . . . . ? 
C12 C13 C14 C10 -46.36(16) . . . . ? 
C9 C10 C14 O3 -76.88(17) . . . . ? 
C11 C10 C14 O3 151.63(13) . . . . ? 
C9 C10 C14 C13 167.34(15) . . . . ? 
C11 C10 C14 C13 35.86(16) . . . . ? 
C9 C10 C14 C15 42.1(2) . . . . ? 
C11 C10 C14 C15 -89.41(16) . . . . ? 
O3 C14 C15 C23 -100.37(17) . . . . ? 
C13 C14 C15 C23 22.6(2) . . . . ? 
C10 C14 C15 C23 139.96(15) . . . . ? 
O3 C14 C15 C16 19.65(16) . . . . ? 
C13 C14 C15 C16 142.61(15) . . . . ? 
C10 C14 C15 C16 -100.02(15) . . . . ? 
C23 C15 C16 C17 90.36(17) . . . . ? 
C14 C15 C16 C17 -33.09(16) . . . . ? 
C15 C16 C17 O3 35.51(16) . . . . ? 
C15 C16 C17 C18 153.94(14) . . . . ? 
O3 C17 C18 C19 -155.22(18) . . . . ? 
C16 C17 C18 C19 88.5(2) . . . . ? 
C17 C18 C19 C24 1.4(3) . . . . ? 
C17 C18 C19 C25 -176.09(18) . . . . ? 
C8 C7 C21 O1 -120.85(17) . . . . ? 
C6 C7 C21 O1 55.5(2) . . . . ? 
C18 C19 C25 O4 -3.4(3) . . . . ? 
C24 C19 C25 O4 178.94(19) . . . . ? 
C18 C17 O3 C14 -146.24(14) . . . . ? 
C16 C17 O3 C14 -23.94(17) . . . . ? 
C13 C14 O3 C17 -123.46(15) . . . . ? 
C15 C14 O3 C17 2.41(17) . . . . ? 
C10 C14 O3 C17 127.63(14) . . . . ? 
  
loop_ 
 _geom_hbond_atom_site_label_D 
 _geom_hbond_atom_site_label_H 
 _geom_hbond_atom_site_label_A 
 _geom_hbond_distance_DH 
 _geom_hbond_distance_HA 
 _geom_hbond_distance_DA 
 _geom_hbond_angle_DHA 
 _geom_hbond_site_symmetry_A 
O4 H4A O1  0.84 1.96 2.7352(19) 152.6 2_646 
O1 H1 O2  0.84 1.92 2.7549(18) 173.7 1_565 
C21 H21B O2  0.99 2.56 3.144(2) 117.7 . 
  
_refine_diff_density_max    0.211 
_refine_diff_density_min   -0.153 
_refine_diff_density_rms    0.030 
  
_shelx_res_file 
; 
  
    cu_180518D_0m.res created by SHELXL-2014/7 
  
TITL 20180612_lmt2_35_1_a.res in P2(1) 
CELL 1.54184 11.94134 6.147908 15.492959 90 101.4154 90 
ZERR 2 0.000088 0.000044 0.000118 0 0.0007 0 
LATT -1 
SYMM -X,0.5+Y,-Z 
SFAC C  H  O 
UNIT 50  72  8 
L.S. 10 
ACTA 
BOND $H 
FMAP 2 
PLAN 11 
HTAB O4 O1_$2 
EQIV $2 -x+1, y-1/2, -z+1 
HTAB O1 O2_$1 
EQIV $1 x, y+1, z 
HTAB C21 O2 
CONF 
SIZE 0.05 0.1 0.25 
TEMP -173 
WGHT    0.043900    0.197900 
FVAR       1.05722 
C1    1    0.272356    0.643782    0.739294    11.00000    0.01770    0.02042 = 
         0.02225   -0.00069    0.00482    0.00025 
AFIX  23 
H1A   2    0.279475    0.498130    0.767095    11.00000   -1.20000 
H1B   2    0.213884    0.724599    0.763589    11.00000   -1.20000 
AFIX   0 
C2    1    0.226911    0.612856    0.640270    11.00000    0.01731    0.01613 = 
         0.02245   -0.00045    0.00244    0.00088 
AFIX  13 
H2    2    0.215513    0.759396    0.611875    11.00000   -1.20000 
AFIX   0 
C3    1    0.114096    0.491111    0.620807    11.00000    0.01837    0.02318 = 
         0.02340    0.00328    0.00097   -0.00035 
C4    1    0.115447    0.324130    0.565505    11.00000    0.02047    0.02396 = 
         0.02962   -0.00125    0.00092   -0.00422 
AFIX  43 
H4    2    0.052854    0.229236    0.545678    11.00000   -1.20000 
AFIX   0 
C5    1    0.226348    0.308146    0.539930    11.00000    0.02329    0.01657 = 
         0.02261    0.00010    0.00031    0.00038 
C6    1    0.305014    0.477161    0.592558    11.00000    0.01867    0.01631 = 
         0.01945   -0.00089    0.00063    0.00029 
AFIX  13 
H6    2    0.358926    0.396115    0.639159    11.00000   -1.20000 
AFIX   0 
C7    1    0.377504    0.609262    0.542366    11.00000    0.02101    0.01611 = 
         0.01954   -0.00152    0.00409    0.00164 
C8    1    0.477553    0.698149    0.579299    11.00000    0.02279    0.02037 = 
         0.01929    0.00108    0.00640   -0.00067 
AFIX  43 
H8    2    0.511829    0.781482    0.539853    11.00000   -1.20000 
AFIX   0 
C9    1    0.546162    0.690620    0.672097    11.00000    0.01875    0.02381 = 
         0.02007   -0.00040    0.00380   -0.00250 
AFIX  23 
H9A   2    0.579871    0.836916    0.685267    11.00000   -1.20000 
H9B   2    0.610574    0.589435    0.671782    11.00000   -1.20000 
AFIX   0 
C10   1    0.491958    0.625951    0.750253    11.00000    0.01760    0.01731 = 
         0.01919   -0.00033    0.00222   -0.00020 
AFIX  13 
H10   2    0.462866    0.474282    0.738018    11.00000   -1.20000 
AFIX   0 
C11   1    0.387992    0.763062    0.768567    11.00000    0.01878    0.01798 = 
         0.01862   -0.00098    0.00219    0.00046 
C12   1    0.411355    0.778557    0.871142    11.00000    0.02139    0.03020 = 
         0.02008   -0.00268    0.00421    0.00173 
AFIX  23 
H12A  2    0.442034    0.923676    0.890983    11.00000   -1.20000 
H12B  2    0.340161    0.753792    0.893350    11.00000   -1.20000 
AFIX   0 
C13   1    0.498488    0.602326    0.904107    11.00000    0.02170    0.03094 = 
         0.01852    0.00338    0.00265   -0.00103 
AFIX  23 
H13A  2    0.461817    0.457504    0.902126    11.00000   -1.20000 
H13B  2    0.539152    0.632356    0.965058    11.00000   -1.20000 
AFIX   0 
C14   1    0.579499    0.615700    0.839329    11.00000    0.01885    0.01923 = 
         0.02084    0.00228    0.00196    0.00149 
C15   1    0.669240    0.802349    0.856951    11.00000    0.01958    0.02258 = 
         0.02022   -0.00006    0.00053   -0.00071 
AFIX  13 
H15   2    0.643730    0.925302    0.815454    11.00000   -1.20000 
AFIX   0 
C16   1    0.775594    0.694516    0.833266    11.00000    0.01884    0.02593 = 
         0.02459   -0.00140    0.00201   -0.00176 
AFIX  23 
H16A  2    0.775000    0.707039    0.769471    11.00000   -1.20000 
H16B  2    0.846702    0.760443    0.866755    11.00000   -1.20000 
AFIX   0 
C17   1    0.764295    0.458070    0.859925    11.00000    0.01673    0.02715 = 
         0.02267    0.00179    0.00029    0.00125 
AFIX  13 
H17   2    0.794034    0.441027    0.924591    11.00000   -1.20000 
AFIX   0 
C18   1    0.822041    0.298780    0.810253    11.00000    0.02193    0.02425 = 
         0.02379    0.00169    0.00070   -0.00033 
AFIX  43 
H18   2    0.777025    0.238855    0.758244    11.00000   -1.20000 
AFIX   0 
C19   1    0.929933    0.232562    0.831486    11.00000    0.02407    0.02672 = 
         0.02680    0.00503    0.00223    0.00336 
C20   1    0.015958    0.564224    0.659537    11.00000    0.01877    0.03396 = 
         0.03204   -0.00413    0.00422   -0.00154 
AFIX 137 
H20A  2   -0.050431    0.471693    0.637701    11.00000   -1.50000 
H20B  2   -0.002647    0.715506    0.642566    11.00000   -1.50000 
H20C  2    0.036314    0.553628    0.723855    11.00000   -1.50000 
AFIX   0 
C21   1    0.328409    0.651375    0.446552    11.00000    0.02383    0.02220 = 
         0.02154   -0.00024    0.00316    0.00203 
AFIX  23 
H21A  2    0.381094    0.746388    0.421766    11.00000   -1.20000 
H21B  2    0.321529    0.511924    0.413974    11.00000   -1.20000 
AFIX   0 
C22   1    0.381152    0.991776    0.729059    11.00000    0.02422    0.01794 = 
         0.02697   -0.00169    0.00204   -0.00014 
AFIX 137 
H22A  2    0.368488    0.981552    0.664732    11.00000   -1.50000 
H22B  2    0.452866    1.069163    0.751069    11.00000   -1.50000 
H22C  2    0.317719    1.071179    0.746057    11.00000   -1.50000 
AFIX   0 
C23   1    0.696193    0.888513    0.951370    11.00000    0.02473    0.03320 = 
         0.02534   -0.00606    0.00130   -0.00198 
AFIX 137 
H23A  2    0.720920    0.767980    0.992080    11.00000   -1.50000 
H23B  2    0.627626    0.955717    0.965536    11.00000   -1.50000 
H23C  2    0.757307    0.997070    0.957014    11.00000   -1.50000 
AFIX   0 
C24   1    1.013535    0.305063    0.912104    11.00000    0.02504    0.05684 = 
         0.03553   -0.00278   -0.00453    0.00872 
AFIX 137 
H24A  2    1.064764    0.415157    0.895536    11.00000   -1.50000 
H24B  2    1.058454    0.179958    0.938576    11.00000   -1.50000 
H24C  2    0.971865    0.367317    0.954735    11.00000   -1.50000 
AFIX   0 
C25   1    0.980813    0.081370    0.773025    11.00000    0.02849    0.03253 = 
         0.03167    0.00571    0.00383    0.00916 
AFIX  23 
H25A  2    1.044955    0.157392    0.754092    11.00000   -1.20000 
H25B  2    1.013035   -0.046186    0.808412    11.00000   -1.20000 
AFIX   0 
O1    3    0.218161    0.753076    0.434692    11.00000    0.02507    0.02055 = 
         0.02633   -0.00253   -0.00270    0.00362 
AFIX 147 
H1    2    0.225618    0.881532    0.453424    11.00000   -1.50000 
AFIX   0 
O2    3    0.256239    0.177779    0.489368    11.00000    0.02947    0.02029 = 
         0.03013   -0.00663    0.00219    0.00077 
O3    3    0.643601    0.415762    0.840011    11.00000    0.01707    0.02038 = 
         0.03306    0.00443    0.00215    0.00255 
O4    3    0.905385    0.005975    0.697467    11.00000    0.04360    0.02819 = 
         0.03183    0.00048    0.00073    0.00960 
AFIX 147 
H4A   2    0.885949    0.110143    0.662638    11.00000   -1.50000 
AFIX   0 
HKLF 4 
  
REM  20180612_lmt2_35_1_a.res in P2(1) 
REM R1 =  0.0291 for    4327 Fo > 4sig(Fo)  and  0.0301 for all    4453 data 
REM    268 parameters refined using      1 restraints 
  
END 
  
WGHT      0.0439      0.1979 
  
REM Highest difference peak  0.211,  deepest hole -0.153,  1-sigma level  0.030 
Q1    1   0.3977  0.7699  0.8207  11.00000  0.05    0.21 
Q2    1   0.5426  0.6142  0.8743  11.00000  0.05    0.19 
Q3    1   0.5065  0.6824  0.7058  11.00000  0.05    0.17 
Q4    1   0.5363  0.6292  0.7932  11.00000  0.05    0.16 
Q5    1   0.7733  0.5730  0.8477  11.00000  0.05    0.16 
Q6    1   0.3536  0.6238  0.5008  11.00000  0.05    0.15 
Q7    1   0.2657  0.4146  0.5591  11.00000  0.05    0.15 
Q8    1   0.2541  0.6362  0.6905  11.00000  0.05    0.15 
Q9    1   0.6775  0.8500  0.8998  11.00000  0.05    0.15 
Q10   1   0.5040  0.6721  0.6262  11.00000  0.05    0.13 
Q11   1   0.9856  0.2646  0.9788  11.00000  0.05    0.13 
; 
_shelx_res_checksum   22278 
  
_shelx_hkl_file 
; 
   0  -7   0   -0.34    2.60 
   0  -7   0   -0.39    2.32 
   0  -7  -1   32.58    3.51 
   0  -7   1   31.20    3.36 
   0  -7   1   27.59    2.84 
   0  -7  -1   26.64    3.09 
   0  -7   2   10.87    2.48 
   0  -7  -2    9.96    2.65 
   0  -7   2    9.30    2.41 
   0  -7   2    8.06    2.02 
   0  -7  -3   43.71    3.67 
   0  -7   3   45.06    3.34 
   0  -7  -3   47.23    3.07 
   0  -7   3   44.41    3.28 
   0  -7   4    0.87    1.83 
   0  -7  -4    2.19    1.92 
   0  -7  -4    1.86    2.35 
   0  -7   4    1.23    1.72 
   0  -7   5   31.40    2.70 
   0  -7   5   38.09    2.58 
   0  -7  -5   33.84    3.27 
   0  -7   5   36.92    2.83 
   0  -7  -5   34.03    2.64 
   0  -7   6   38.13    2.39 
   0  -7   6   43.26    2.76 
   0  -7  -6   39.42    2.68 
   0  -7   6   37.21    2.58 
   0  -7  -6   34.85    3.09 
   0  -7   7  170.02    6.99 
   0  -7  -7  150.44    7.29 
   0  -7   7  158.78    6.99 
   0  -6   0  407.66   17.67 
   0  -6   0  401.01   17.15 
   0  -6  -1  174.41    8.79 
   0  -6   1  184.48    8.59 
   0  -6   1  191.83    9.24 
   0  -6   2   18.56    3.29 
   0  -6  -2   13.30    3.01 
   0  -6  -2   19.31    2.88 
   0  -6   3  163.42    8.64 
   0  -6  -3  151.66    7.91 
   0  -6  -3  159.05    8.13 
   0  -6   3  167.77    8.25 
   0  -6   4   49.72    4.07 
   0  -6   4   45.70    4.54 
   0  -6  -4   53.85    4.28 
   0  -6  -5   51.41    4.48 
   0  -6   5   49.07    4.32 
   0  -6   5   52.18    4.56 
   0  -6  -6   58.95    4.02 
   0  -6  -6   67.20    4.90 
   0  -6   6   66.77    4.59 
   0  -6   6   64.16    4.78 
   0  -6   7   50.32    4.02 
   0  -6  -7   52.18    3.67 
   0  -6  -7   50.04    4.55 
   0  -6   7   53.02    4.45 
   0  -6  -8   87.36    5.76 
   0  -6   8   99.35    5.26 
   0  -6   8   97.08    5.53 
   0  -6  -8   87.78    5.09 
   0  -6   9   53.84    3.59 
   0  -6  -9   52.89    3.69 
   0  -6  -9   53.83    4.32 
   0  -6   9   59.61    3.83 
   0  -6 -10  102.84    5.45 
   0  -6  10  114.88    5.25 
   0  -6  10  103.33    5.10 
   0  -6  10  118.19    5.48 
   0  -6 -10  101.30    5.87 
   0  -6  11   40.35    2.44 
   0  -6  11   34.90    2.18 
   0  -6 -11   34.31    3.18 
   0  -6  11   33.30    2.00 
   0  -6  11   36.07    2.18 
   0  -6 -11   31.37    2.58 
   0  -5   0    7.54    2.97 
   0  -5   0    4.48    2.55 
   0  -5   1  225.89   10.31 
   0  -5  -1  227.76   10.39 
   0  -5  -2  113.56    6.48 
   0  -5   2  128.76    6.93 
   0  -5   2  111.54    6.11 
   0  -5  -3  107.86    5.65 
   0  -5   3  107.81    5.77 
   0  -5   3  100.25    6.29 
   0  -5  -4  117.98    6.11 
   0  -5   4  108.77    6.50 
   0  -5   4  108.75    7.07 
   0  -5  -5  127.56    6.42 
   0  -5   5  126.18    7.05 
   0  -5  -5  131.70    6.81 
   0  -5   5  131.38    7.50 
   0  -5   6  185.58    9.45 
   0  -5  -6  183.31    8.71 
   0  -5   7    5.53    3.26 
   0  -5   7    3.91    3.10 
   0  -5  -7    7.18    2.54 
   0  -5   8  164.71    9.09 
   0  -5  -8  174.64    8.52 
   0  -5   8  164.65    7.86 
   0  -5   8  182.10    8.91 
   0  -5  -9  136.67    6.89 
   0  -5   9  157.73    7.70 
   0  -5   9  146.79    8.05 
   0  -5  -9  139.95    7.56 
   0  -5 -10   45.58    4.25 
   0  -5 -10   43.67    3.50 
   0  -5  10   52.18    4.52 
   0  -5  10   53.91    4.17 
   0  -5  11   53.75    3.63 
   0  -5 -11   48.11    4.75 
   0  -5  11   52.05    4.18 
   0  -5 -11   48.65    4.24 
   0  -5 -11   43.68    3.52 
   0  -5  11   50.74    3.84 
   0  -5  11   51.45    3.28 
   0  -5 -12   15.46    2.43 
   0  -5 -12   11.61    3.58 
   0  -5  12   18.95    2.59 
   0  -5 -12   18.03    3.24 
   0  -5  12   16.78    2.34 
   0  -5  12   18.68    2.38 
   0  -5  12   15.71    2.10 
   0  -5 -13   46.07    3.65 
   0  -5 -13   38.71    2.85 
   0  -5 -13   40.59    3.71 
   0  -5  13   42.87    2.64 
   0  -5  13   43.81    2.98 
   0  -5  13   43.81    2.53 
   0  -5  13   43.42    2.78 
   0  -5 -14   47.83    3.08 
   0  -5 -14   45.83    3.24 
   0  -5 -14   41.95    3.12 
   0  -4  -1   56.02    3.37 
   0  -4   1   60.83    3.64 
   0  -4   2   69.17    4.08 
   0  -4  -3   35.76    2.68 
   0  -4   3   30.28    3.22 
   0  -4   3   34.85    3.05 
   0  -4   4   81.10    4.60 
   0  -4   4   83.09    5.15 
   0  -4  -4   89.87    4.71 
   0  -4   5   34.71    3.89 
   0  -4   5   37.76    3.71 
   0  -4  -5   38.31    2.83 
   0  -4  -6   96.18    5.00 
   0  -4   6   86.80    5.91 
   0  -4   6   93.37    5.57 
   0  -4  -7  212.90    9.40 
   0  -4   7  218.52   10.23 
   0  -4   8   10.53    3.52 
   0  -4   8   10.10    3.02 
   0  -4  -8   11.04    2.79 
   0  -4   8   15.37    3.30 
   0  -4   9  318.07   14.13 
   0  -4   9  351.15   15.02 
   0  -4   9  344.99   15.27 
   0  -4  -9  322.73   14.22 
   0  -4  -9  351.32   14.73 
   0  -4 -10  184.78    9.51 
   0  -4 -10  183.76    9.04 
   0  -4  10  208.55    9.86 
   0  -4  10  217.95   10.02 
   0  -4  11  167.82    8.64 
   0  -4 -11  157.05    9.15 
   0  -4 -11  158.58    8.06 
   0  -4  11  175.09    8.40 
   0  -4  11  162.90    7.97 
   0  -4 -11  171.64    8.66 
   0  -4  12  146.82    7.21 
   0  -4  12  139.61    6.89 
   0  -4  12  144.53    7.59 
   0  -4  12  148.55    7.27 
   0  -4 -12  157.33    8.58 
   0  -4 -12  138.66    7.83 
   0  -4  12  148.31    7.80 
   0  -4  13   12.83    2.84 
   0  -4  13   12.71    2.40 
   0  -4 -13   17.95    3.60 
   0  -4  13   13.14    2.35 
   0  -4  13   11.87    1.94 
   0  -4 -13    9.81    2.71 
   0  -4 -13   10.60    3.93 
   0  -4  13   14.67    2.79 
   0  -4  14   30.14    2.23 
   0  -4  14   33.32    2.46 
   0  -4  14   33.11    2.51 
   0  -4 -14   34.30    3.70 
   0  -4 -14   32.19    3.12 
   0  -4 -15    4.46    2.47 
   0  -4  15    6.83    1.25 
   0  -4 -15    5.25    1.89 
   0  -4 -15    2.85    2.70 
   0  -4 -16    5.65    1.67 
   0  -4 -16    7.92    1.72 
   0  -4 -16    4.35    1.79 
   0  -3   0   -1.58    2.21 
   0  -3   0    1.09    1.37 
   0  -3   1  854.84   34.60 
   0  -3  -1  819.76   33.99 
   0  -3  -1  936.05   35.97 
   0  -3  -2  394.87   16.63 
   0  -3   2  384.47   16.98 
   0  -3  -2  343.24   15.06 
   0  -3  -2  331.81   14.04 
   0  -3   2  399.32   15.62 
   0  -3   3  402.84   17.72 
   0  -3  -3  415.00   18.70 
   0  -3   3  425.81   19.25 
   0  -3  -3  389.98   17.58 
   0  -3  -4   63.10    4.53 
   0  -3   4   54.83    4.29 
   0  -3  -4   77.96    5.71 
   0  -3   4   66.41    3.82 
   0  -3   4   67.87    3.54 
   0  -3   4   66.84    4.66 
   0  -3   4   70.44    5.94 
   0  -3   5  618.37   27.96 
   0  -3  -5  617.79   26.68 
   0  -3   5  650.51   26.64 
   0  -3   5  605.17   25.19 
   0  -3   5  614.75   25.05 
   0  -3  -6  226.92   12.02 
   0  -3  -6  243.09    9.89 
   0  -3   6  223.61   10.46 
   0  -3   6  228.15   10.21 
   0  -3  -7  375.47   15.34 
   0  -3   7  359.29   15.82 
   0  -3   7  371.10   15.84 
   0  -3  -8  112.31    5.53 
   0  -3   8  105.99    6.38 
   0  -3  -8  119.20    5.79 
   0  -3   8  115.53    6.36 
   0  -3  -9   78.57    4.90 
   0  -3   9   87.72    5.61 
   0  -3   9   85.93    4.70 
   0  -3   9   92.30    5.64 
   0  -3  -9   87.17    4.73 
   0  -3 -10  315.18   13.67 
   0  -3  10  301.95   14.02 
   0  -3  10  311.27   13.38 
   0  -3 -10  322.90   13.97 
   0  -3  10  332.28   14.40 
   0  -3  11   62.04    4.89 
   0  -3  11   57.41    4.06 
   0  -3 -11   57.21    5.21 
   0  -3  11   56.61    4.90 
   0  -3 -11   62.14    4.63 
   0  -3  11   56.57    4.11 
   0  -3 -11   62.77    4.33 
   0  -3 -12  593.61   24.82 
   0  -3  12  594.25   25.06 
   0  -3  12  580.49   24.49 
   0  -3 -12  602.57   25.14 
   0  -3  12  606.31   24.63 
   0  -3  12  597.28   24.95 
   0  -3 -12  616.85   25.44 
   0  -3  12  588.94   24.61 
   0  -3 -13  180.54    9.51 
   0  -3  13  161.58    7.83 
   0  -3  13  175.01    8.54 
   0  -3  13  172.20    8.11 
   0  -3 -13  174.44    8.95 
   0  -3  13  164.25    8.69 
   0  -3  13  171.35    8.12 
   0  -3 -13  163.06    8.46 
   0  -3  14    0.69    1.67 
   0  -3  14    1.25    2.03 
   0  -3 -14    0.49    4.13 
   0  -3 -14   -2.00    4.20 
   0  -3  14   -0.67    2.01 
   0  -3 -14    0.14    3.28 
   0  -3  14    1.04    1.88 
   0  -3 -14    4.34    2.87 
   0  -3  15   54.04    3.17 
   0  -3 -15   54.97    4.95 
   0  -3 -15   46.98    3.91 
   0  -3  15   55.10    3.27 
   0  -3 -16   22.79    3.30 
   0  -3 -16   18.48    3.11 
   0  -3 -16   20.26    2.47 
   0  -3  16   19.27    1.68 
   0  -3 -17   12.35    2.04 
   0  -3 -17   13.36    2.05 
   0  -3 -17   16.49    2.51 
   0  -2   0 2332.36   94.26 
   0  -2   0 2571.40   95.22 
   0  -2  -1 1899.73   72.83 
   0  -2  -1 1802.51   71.31 
   0  -2   1 1925.64   72.20 
   0  -2  -1 1807.71   71.76 
   0  -2  -1 1888.31   71.97 
   0  -2   2 1335.72   50.92 
   0  -2  -2 1320.81   50.78 
   0  -2  -2 1259.18   50.06 
   0  -2  -2 1227.24   51.30 
   0  -2  -3 3350.06  129.08 
   0  -2   3 3369.10  129.29 
   0  -2  -3 3226.40  129.20 
   0  -2   3 3186.77  130.04 
   0  -2  -4  686.84   28.17 
   0  -2   4  637.69   28.89 
   0  -2   4  744.00   28.16 
   0  -2   4  668.57   27.63 
   0  -2  -4  672.19   27.03 
   0  -2  -5  211.83   10.35 
   0  -2  -5  210.92   10.11 
   0  -2  -5  208.99    9.17 
   0  -2   5  208.23    9.36 
   0  -2   5  217.21   10.04 
   0  -2   6    0.81    1.69 
   0  -2   6    1.82    1.24 
   0  -2  -6   -0.48    2.16 
   0  -2  -6   -1.50    2.07 
   0  -2  -6    0.80    1.95 
   0  -2   6    0.18    1.55 
   0  -2   6    0.54    1.76 
   0  -2  -7  239.85   13.34 
   0  -2  -7  265.98   13.14 
   0  -2  -7  270.22   10.64 
   0  -2  -7  259.18   10.45 
   0  -2   7  218.81   10.94 
   0  -2   7  253.87   11.56 
   0  -2  -7  254.14   12.64 
   0  -2   7  250.94   10.94 
   0  -2  -7  240.83   12.71 
   0  -2  -8  307.03   12.37 
   0  -2   8  269.78   13.27 
   0  -2   8  300.90   12.67 
   0  -2   8  271.10   12.64 
   0  -2  -8  296.63   12.16 
   0  -2   8  295.77   12.27 
   0  -2  -9  392.01   15.89 
   0  -2  -9  413.78   16.29 
   0  -2   9  375.80   15.86 
   0  -2   9  393.71   16.33 
   0  -2  -9  400.62   16.14 
   0  -2  10  123.76    5.85 
   0  -2 -10  119.30    6.00 
   0  -2  10  117.07    6.14 
   0  -2 -10  120.60    6.43 
   0  -2 -10  120.59    6.33 
   0  -2  10  123.23    6.20 
   0  -2  10  115.00    6.33 
   0  -2  11   58.95    4.16 
   0  -2 -11   61.00    4.60 
   0  -2 -11   60.30    4.81 
   0  -2  11   52.54    4.61 
   0  -2 -11   61.92    4.08 
   0  -2  11   54.91    3.52 
   0  -2  11   59.82    4.05 
   0  -2  11   52.45    3.94 
   0  -2  12  289.10   12.56 
   0  -2  12  272.50   12.52 
   0  -2  12  285.53   12.53 
   0  -2  12  286.91   12.17 
   0  -2 -12  299.81   13.20 
   0  -2 -12  282.63   13.23 
   0  -2  12  289.39   13.01 
   0  -2 -13   21.70    4.62 
   0  -2  13   16.09    2.53 
   0  -2  13   20.65    2.71 
   0  -2  13   15.22    3.32 
   0  -2 -13   18.20    4.25 
   0  -2 -13   19.87    3.93 
   0  -2  13   17.63    2.62 
   0  -2  13   19.39    2.87 
   0  -2  14   22.01    2.48 
   0  -2 -14   25.14    4.49 
   0  -2 -14   21.72    4.61 
   0  -2  14   22.98    2.77 
   0  -2 -14   22.69    4.10 
   0  -2  14   21.13    2.67 
   0  -2  14   20.67    2.63 
   0  -2  15   63.06    3.65 
   0  -2 -15   72.54    5.50 
   0  -2 -15   62.73    5.49 
   0  -2  15   65.91    3.97 
   0  -2  15   62.74    3.81 
   0  -2 -15   68.41    5.70 
   0  -2  16   54.09    3.14 
   0  -2 -16   57.61    4.71 
   0  -2 -16   55.56    4.75 
   0  -2  16   50.66    3.10 
   0  -2 -16   50.47    4.42 
   0  -2 -17   -0.99    2.52 
   0  -2  17    1.22    0.97 
   0  -2 -17   -0.90    2.26 
   0  -2 -17    0.82    2.63 
   0  -2 -18   10.23    1.76 
   0  -2 -18    9.07    1.82 
   0  -1   0    0.26    0.50 
   0  -1   0   -0.29    1.02 
   0  -1   0    0.37    0.84 
   0  -1  -1 3528.42  142.40 
   0  -1  -1 3773.62  142.59 
   0  -1   1 3863.76  142.71 
   0  -1  -1 3616.41  142.62 
   0  -1  -2  150.42    6.58 
   0  -1   2  147.42    6.32 
   0  -1   2  152.42    7.10 
   0  -1  -2  142.98    6.49 
   0  -1   3 3243.88  126.13 
   0  -1   3 3534.44  125.45 
   0  -1   3 3194.65  125.32 
   0  -1   4 2664.31  105.39 
   0  -1  -4 2693.50  105.95 
   0  -1   4 2818.90  105.65 
   0  -1   4 2644.36  105.33 
   0  -1  -5 1462.02   63.17 
   0  -1   5 1510.69   62.17 
   0  -1  -5 1602.67   62.95 
   0  -1   5 1639.15   62.22 
   0  -1   5 1657.58   62.53 
   0  -1  -6    6.45    3.07 
   0  -1   6    5.50    1.35 
   0  -1  -6    6.06    2.25 
   0  -1   6    5.11    1.58 
   0  -1   7  276.39   12.38 
   0  -1  -7  292.04   13.99 
   0  -1   7  307.99   12.97 
   0  -1  -7  259.17   13.69 
   0  -1   7  320.37   13.37 
   0  -1   7  320.21   13.47 
   0  -1  -7  305.19   12.16 
   0  -1  -7  296.98   14.34 
   0  -1   8   28.07    2.80 
   0  -1  -8   25.54    2.27 
   0  -1   8   26.68    2.11 
   0  -1  -8   20.87    3.29 
   0  -1  -8   28.63    2.00 
   0  -1  -8   26.67    3.54 
   0  -1  -8   26.23    3.78 
   0  -1  -8   26.82    1.91 
   0  -1   8   24.56    2.25 
   0  -1   8   25.14    1.97 
   0  -1   8   21.00    2.35 
   0  -1  -8   25.13    2.05 
   0  -1   8   22.20    2.65 
   0  -1  -9 1030.92   39.87 
   0  -1   9  994.62   39.60 
   0  -1   9 1014.94   39.76 
   0  -1  -9 1009.14   39.66 
   0  -1   9  996.84   39.73 
   0  -1  -9  912.22   42.48 
   0  -1  -9 1008.96   39.73 
   0  -1   9  987.63   39.77 
   0  -1  -9  986.40   39.63 
   0  -1  10  182.71    8.24 
   0  -1  10  178.64    7.89 
   0  -1 -10  193.17    8.58 
   0  -1  10  181.30    8.23 
   0  -1  10  188.46    8.08 
   0  -1 -10  176.28    8.25 
   0  -1 -10  183.70    8.18 
   0  -1  10  171.48    8.25 
   0  -1 -10  184.56    8.25 
   0  -1 -11  195.66    8.94 
   0  -1  11  193.09    8.84 
   0  -1 -11  194.89    9.37 
   0  -1 -11  202.58    9.39 
   0  -1  11  196.55    8.88 
   0  -1  11  184.09    8.83 
   0  -1 -11  200.86    8.90 
   0  -1  11  199.31    8.63 
   0  -1 -11  182.24    9.02 
   0  -1  12  236.15   10.34 
   0  -1  12  224.18   10.59 
   0  -1  12  239.03   10.73 
   0  -1 -12  258.39   10.90 
   0  -1  12  237.81   10.64 
   0  -1 -12  243.24   11.43 
   0  -1 -12  247.67   11.26 
   0  -1 -12  236.84   11.12 
   0  -1  12  230.58   10.50 
   0  -1  13  280.33   12.42 
   0  -1  13  277.39   12.42 
   0  -1 -13  283.92   13.41 
   0  -1  13  297.40   12.21 
   0  -1  13  283.74   12.52 
   0  -1 -13  285.06   12.84 
   0  -1 -13  297.84   13.52 
   0  -1 -14  143.98    8.35 
   0  -1  14  144.70    7.14 
   0  -1 -14  152.94    7.60 
   0  -1 -14  149.24    8.54 
   0  -1  14  137.34    6.94 
   0  -1 -14  151.39    8.12 
   0  -1  14  141.49    6.92 
   0  -1 -15   43.02    4.98 
   0  -1 -15   41.20    3.83 
   0  -1  15   38.07    2.89 
   0  -1  15   36.76    3.21 
   0  -1 -15   37.29    4.17 
   0  -1  15   37.63    3.02 
   0  -1 -15   36.15    4.80 
   0  -1 -16   26.78    3.05 
   0  -1  16   24.96    2.48 
   0  -1  16   25.81    2.25 
   0  -1 -16   25.15    3.18 
   0  -1  16   23.82    2.13 
   0  -1 -16   31.92    3.76 
   0  -1 -17    5.52    2.65 
   0  -1 -17   -2.81    3.39 
   0  -1  17    0.94    1.34 
   0  -1 -18   14.54    2.54 
   0  -1 -18    9.71    1.77 
   0   0  -1 1584.79   61.74 
   0   0  -2  898.97   35.84 
   0   0   2  921.19   35.76 
   0   0   3 4770.28  169.84 
   0   0  -3 4499.96  169.98 
   0   0  -3 4186.35  169.82 
   0   0  -3 4001.43  169.85 
   0   0   4  621.88   23.65 
   0   0   4  618.68   23.65 
   0   0  -4  562.51   23.87 
   0   0  -4  536.94   23.67 
   0   0  -5    1.33    2.06 
   0   0   5   -0.08    1.28 
   0   0  -5   -0.98    1.57 
   0   0   5   -0.41    1.38 
   0   0   6   23.92    2.34 
   0   0  -6   31.43    3.23 
   0   0  -7  997.87   36.32 
   0   0   7  900.86   35.15 
   0   0  -7  839.82   35.59 
   0   0   7  939.92   35.05 
   0   0  -7  807.19   33.96 
   0   0  -7  837.58   35.42 
   0   0   8   60.59    4.05 
   0   0  -8   59.26    4.66 
   0   0   8   66.29    3.28 
   0   0  -8   55.75    3.29 
   0   0   8   58.61    3.15 
   0   0  -8   57.03    3.22 
   0   0  -8   62.18    3.29 
   0   0   8   61.56    4.23 
   0   0  -8   57.29    4.81 
   0   0   8   54.78    3.82 
   0   0   8   58.73    3.33 
   0   0   8   57.81    3.26 
   0   0   8   61.71    3.37 
   0   0   8   64.41    3.25 
   0   0  -9    9.38    1.90 
   0   0   9   10.28    1.35 
   0   0   9   13.81    2.27 
   0   0  -9   12.28    1.91 
   0   0   9   13.40    1.71 
   0   0   9    6.84    1.82 
   0   0   9   11.80    1.99 
   0   0  -9    5.67    5.16 
   0   0  -9    7.35    3.56 
   0   0   9   10.21    1.67 
   0   0   9   10.42    1.87 
   0   0   9   11.54    1.89 
   0   0  -9   11.20    2.14 
   0   0  -9   10.60    2.08 
   0   0   9   13.51    1.78 
   0   0  -9    8.77    2.65 
   0   0  -9   12.47    2.96 
   0   0 -10 1190.40   48.37 
   0   0 -10 1210.10   48.29 
   0   0  10 1233.15   48.22 
   0   0 -10 1195.65   48.29 
   0   0  10 1247.41   48.21 
   0   0 -10 1127.68   48.26 
   0   0  10 1221.06   48.18 
   0   0 -10 1199.99   48.37 
   0   0  10 1259.35   48.08 
   0   0  10 1253.13   48.17 
   0   0  10 1216.79   47.91 
   0   0 -11    1.65    2.31 
   0   0 -11    5.06    2.65 
   0   0 -11    4.75    2.63 
   0   0 -11    1.50    2.96 
   0   0  11    3.20    1.99 
   0   0  11    2.21    2.31 
   0   0  11    1.45    1.85 
   0   0 -11    3.21    2.86 
   0   0  11    3.88    1.92 
   0   0  12  235.17   10.45 
   0   0 -12  236.85   11.09 
   0   0  12  224.39   10.35 
   0   0  12  248.97   10.25 
   0   0 -12  226.57   11.05 
   0   0 -12  225.07   10.96 
   0   0 -12  235.47   10.94 
   0   0 -12  227.46   10.76 
   0   0  12  232.93   10.30 
   0   0  13   34.80    2.73 
   0   0 -13   30.82    4.41 
   0   0  13   29.59    2.82 
   0   0  13   25.86    2.79 
   0   0  13   27.19    3.23 
   0   0 -13   26.78    4.30 
   0   0 -13   33.25    4.25 
   0   0 -14    3.22    3.62 
   0   0  14    0.41    1.58 
   0   0  14    0.18    2.03 
   0   0 -14   -0.78    3.65 
   0   0 -14    0.72    3.22 
   0   0  14   -0.93    2.07 
   0   0 -14    2.97    2.78 
   0   0  14    0.91    2.45 
   0   0  15  133.77    6.41 
   0   0 -15  131.33    7.49 
   0   0 -15  145.40    7.90 
   0   0 -15  127.98    7.69 
   0   0 -15  123.18    7.01 
   0   0  15  132.65    6.58 
   0   0  15  137.74    6.21 
   0   0  15  134.16    6.41 
   0   0 -16   -4.50    4.00 
   0   0  16   -0.08    1.92 
   0   0 -16    2.76    2.47 
   0   0 -16    1.17    3.26 
   0   0  16    0.07    1.47 
   0   0 -17   24.02    3.76 
   0   0  17   29.15    2.26 
   0   0 -17   29.02    3.35 
   0   0 -17   24.09    3.31 
   0   0  18    3.19    1.00 
   0   0 -18    2.28    1.80 
   0   0 -18    3.34    2.34 
   0   0 -18    6.15    2.01 
   0   1   0   -0.10    0.67 
   0   1   0   -0.57    1.53 
   0   1  -1 3768.63  143.70 
   0   1  -1 3620.86  143.78 
   0   1  -1 3832.30  144.23 
   0   1   1 3638.69  143.63 
   0   1  -1 3704.64  143.75 
   0   1  -2  157.45    6.54 
   0   1   2  157.13    6.65 
   0   1   2  152.85    6.37 
   0   1   2  161.09    6.37 
   0   1  -2  150.24    6.68 
   0   1  -3 3227.70  133.46 
   0   1   3 3554.48  133.44 
   0   1   3 3467.64  133.15 
   0   1  -3 3355.73  133.32 
   0   1  -3 3560.13  134.15 
   0   1   3 3397.64  133.16 
   0   1   4 2808.56  105.71 
   0   1   4 2756.38  105.45 
   0   1  -4 2653.41  105.63 
   0   1  -4 2569.70  106.48 
   0   1   4 2685.25  105.38 
   0   1  -4 2642.95  105.77 
   0   1   5 1569.20   61.55 
   0   1   5 1565.68   61.22 
   0   1  -5 1543.46   61.56 
   0   1  -5 1555.63   61.71 
   0   1  -5 1510.47   62.70 
   0   1  -6    6.31    1.92 
   0   1   6    7.85    1.69 
   0   1  -6   10.53    3.68 
   0   1  -7  306.06   12.09 
   0   1   7  289.19   12.13 
   0   1   7  298.98   12.12 
   0   1   7  294.73   12.02 
   0   1   7  289.98   12.06 
   0   1  -7  294.75   12.01 
   0   1  -7  297.53   12.06 
   0   1  -7  281.97   11.97 
   0   1  -7  248.24   12.87 
   0   1  -8   25.69    5.13 
   0   1  -8   24.22    2.03 
   0   1  -8   23.50    1.96 
   0   1   8   20.93    2.08 
   0   1  -8   24.57    2.08 
   0   1  -8   24.27    2.81 
   0   1  -8   21.98    1.96 
   0   1   8   20.85    1.94 
   0   1  -8   22.00    3.07 
   0   1   8   22.27    2.04 
   0   1  -8   24.20    2.22 
   0   1  -8   27.34    2.21 
   0   1   8   23.94    1.76 
   0   1   8   25.28    1.99 
   0   1   8   19.02    2.09 
   0   1   8   24.39    2.68 
   0   1   8   23.05    2.64 
   0   1   9  996.46   39.56 
   0   1  -9  962.33   39.53 
   0   1   9 1010.58   39.50 
   0   1  -9  973.87   39.51 
   0   1  -9 1019.33   39.49 
   0   1   9 1028.81   39.34 
   0   1  -9  839.78   41.04 
   0   1  -9  981.57   39.64 
   0   1  -9  985.98   39.64 
   0   1   9 1044.78   39.49 
   0   1  -9  910.54   41.59 
   0   1   9 1020.34   39.59 
   0   1  -9 1009.82   39.61 
   0   1   9  976.27   39.74 
   0   1 -10  183.83    8.30 
   0   1 -10  188.46    8.60 
   0   1  10  195.76    8.07 
   0   1  10  181.67    8.69 
   0   1 -10  176.56    8.65 
   0   1  10  186.60    8.30 
   0   1  10  192.25    8.32 
   0   1 -10  181.34    8.71 
   0   1  10  179.44    8.40 
   0   1 -10  181.09    8.48 
   0   1  10  196.57    8.47 
   0   1 -11  184.29    9.11 
   0   1 -11  194.59    9.53 
   0   1  11  194.75    9.01 
   0   1 -11  184.80    9.28 
   0   1  11  205.13    8.89 
   0   1  11  196.20    8.95 
   0   1 -11  211.05    9.57 
   0   1  11  208.23    8.90 
   0   1 -11  198.49    8.92 
   0   1  12  274.04   10.96 
   0   1 -12  227.96   10.91 
   0   1 -12  243.21   11.55 
   0   1 -12  243.00   11.61 
   0   1 -12  227.90   11.32 
   0   1  12  241.79   11.04 
   0   1  12  266.63   10.98 
   0   1  12  258.71   11.04 
   0   1 -13  267.25   12.47 
   0   1 -13  280.30   13.35 
   0   1  13  303.16   12.64 
   0   1 -13  270.73   13.07 
   0   1  13  300.00   12.43 
   0   1 -13  288.12   13.28 
   0   1  13  297.73   12.49 
   0   1  14  155.86    7.46 
   0   1 -14  145.45    8.29 
   0   1  14  157.31    7.20 
   0   1  14  147.51    7.21 
   0   1 -14  159.39    8.64 
   0   1 -15   38.03    4.76 
   0   1  15   41.13    3.35 
   0   1  15   43.49    3.01 
   0   1 -15   36.53    3.98 
   0   1 -15   36.54    4.43 
   0   1 -16   27.35    3.28 
   0   1 -16   28.66    4.34 
   0   1  16   28.68    2.24 
   0   1 -16   24.50    3.65 
   0   1  16   25.14    2.54 
   0   1  17    3.13    1.56 
   0   1  17    2.36    1.11 
   0   1 -17    1.47    2.66 
   0   1 -17    3.04    1.99 
   0   1 -17    5.56    3.18 
   0   1  17    2.79    1.20 
   0   1 -18   15.28    2.06 
   0   1 -18   18.65    2.47 
   0   2   0 2550.01   95.80 
   0   2   0 2473.49   94.63 
   0   2   0 2375.23   94.49 
   0   2   1 1913.11   73.68 
   0   2  -1 1926.29   73.76 
   0   2  -1 1887.08   72.54 
   0   2  -1 1782.55   72.65 
   0   2  -2 1219.34   51.10 
   0   2  -2 1307.10   51.05 
   0   2   2 1350.88   51.06 
   0   2  -2 1284.78   50.77 
   0   2  -2 1360.34   52.12 
   0   2   3 3383.61  126.63 
   0   2  -3 3233.06  126.71 
   0   2  -3 3121.41  126.28 
   0   2  -3 3322.37  126.75 
   0   2  -3 3159.38  127.59 
   0   2  -4  669.06   27.16 
   0   2  -4  610.72   25.24 
   0   2  -4  626.85   25.79 
   0   2   4  726.87   26.19 
   0   2  -4  663.24   26.30 
   0   2  -4  664.07   26.38 
   0   2  -5  197.39    9.52 
   0   2   5  193.61    8.56 
   0   2  -5  208.65    8.40 
   0   2  -5  192.30   10.19 
   0   2  -5  192.39    9.36 
   0   2   5  210.57    9.20 
   0   2   5  205.34    8.53 
   0   2  -5  182.24    8.39 
   0   2   5  210.37    9.36 
   0   2   5  210.24    8.64 
   0   2  -5  190.56    8.87 
   0   2  -5  199.11    8.36 
   0   2   6    0.67    0.56 
   0   2   6    0.72    1.43 
   0   2   6    1.48    1.49 
   0   2  -6   -0.33    1.39 
   0   2   6   -0.42    1.30 
   0   2  -6    0.94    1.81 
   0   2  -6    0.75    1.09 
   0   2   6    0.34    1.72 
   0   2   6    0.71    1.19 
   0   2  -6    1.54    1.23 
   0   2   6    0.46    0.43 
   0   2   6   -0.33    1.60 
   0   2  -6    2.42    1.15 
   0   2  -6    0.73    1.32 
   0   2  -6    1.20    1.27 
   0   2   6    1.51    1.50 
   0   2  -6   -0.34    1.65 
   0   2   7  243.89   10.63 
   0   2  -7  243.12   10.47 
   0   2   7  256.63   11.75 
   0   2   7  243.10   10.63 
   0   2  -7  247.46   10.54 
   0   2   7  241.66   10.60 
   0   2   7  260.32   10.58 
   0   2  -7  244.61   10.44 
   0   2  -7  242.01   12.30 
   0   2  -7  255.13   10.54 
   0   2   7  247.57   10.35 
   0   2  -7  251.40   10.43 
   0   2  -8  304.82   12.22 
   0   2   8  292.24   12.54 
   0   2   8  276.31   12.10 
   0   2  -8  281.27   13.78 
   0   2  -8  261.00   14.32 
   0   2   8  305.79   12.48 
   0   2  -8  289.50   12.28 
   0   2   8  309.85   12.53 
   0   2   8  312.39   12.38 
   0   2  -8  292.75   12.40 
   0   2  -8  289.69   12.40 
   0   2  -8  270.99   12.36 
   0   2  -8  301.22   12.50 
   0   2   9  392.74   16.32 
   0   2  -9  402.59   16.69 
   0   2  -9  389.22   16.50 
   0   2   9  417.40   16.92 
   0   2  -9  391.96   16.73 
   0   2  -9  392.64   16.51 
   0   2   9  440.11   16.65 
   0   2  -9  392.75   16.82 
   0   2  -9  381.75   16.67 
   0   2   9  413.47   16.71 
   0   2   9  393.09   16.62 
   0   2 -10  114.40    6.46 
   0   2 -10  118.40    5.98 
   0   2  10  122.60    6.63 
   0   2 -10  121.79    6.09 
   0   2  10  123.12    6.10 
   0   2  10  122.59    6.24 
   0   2  10  123.81    6.01 
   0   2 -10  121.47    6.63 
   0   2 -10  120.01    6.28 
   0   2  10  122.86    5.65 
   0   2 -11   56.02    4.84 
   0   2  11   56.08    3.22 
   0   2 -11   57.60    4.14 
   0   2  11   61.41    4.12 
   0   2 -11   50.72    3.92 
   0   2  11   60.36    3.50 
   0   2 -11   55.25    3.78 
   0   2 -11   62.05    4.74 
   0   2  11   56.31    3.86 
   0   2  12  294.31   12.44 
   0   2  12  300.37   12.89 
   0   2 -12  294.71   13.60 
   0   2 -12  288.73   13.01 
   0   2  12  312.35   12.83 
   0   2 -12  287.24   13.56 
   0   2 -12  273.78   13.04 
   0   2  13   25.66    3.08 
   0   2 -13   19.92    3.33 
   0   2 -13   21.58    4.27 
   0   2 -13   20.99    2.95 
   0   2  13   19.04    2.42 
   0   2 -14   23.89    3.29 
   0   2  14   23.70    3.01 
   0   2 -14   24.04    4.48 
   0   2  14   20.84    2.54 
   0   2 -14   25.04    3.14 
   0   2  15   67.89    3.77 
   0   2 -15   63.87    5.48 
   0   2  15   68.24    4.12 
   0   2 -15   58.01    4.07 
   0   2 -15   66.42    4.59 
   0   2  15   68.06    3.72 
   0   2  16   52.83    2.96 
   0   2  16   53.95    2.95 
   0   2 -16   55.36    4.69 
   0   2 -17   -0.09    2.18 
   0   2 -17    4.70    2.69 
   0   2  17    1.57    0.86 
   0   2 -18   12.24    2.05 
   0   3   0    2.28    0.45 
   0   3   0   -0.09    0.33 
   0   3   0    0.75    0.66 
   0   3   0    0.88    1.36 
   0   3   0    1.21    1.10 
   0   3   0   -0.20    1.93 
   0   3   1  863.63   34.32 
   0   3   1  860.16   34.21 
   0   3  -1  914.41   36.02 
   0   3  -1  848.74   34.10 
   0   3   1  839.10   34.06 
   0   3  -1  857.00   34.12 
   0   3   1  938.63   36.08 
   0   3   1  823.53   34.15 
   0   3  -1  885.41   34.06 
   0   3   1  854.93   34.02 
   0   3   1  873.24   34.18 
   0   3  -1  871.77   34.17 
   0   3   1  880.71   34.17 
   0   3  -1  867.67   34.15 
   0   3   2  377.18   15.38 
   0   3  -2  383.72   15.32 
   0   3   2  377.61   15.38 
   0   3   2  361.18   15.37 
   0   3  -2  387.67   15.28 
   0   3   2  380.70   15.78 
   0   3   2  374.31   15.44 
   0   3  -2  384.82   17.17 
   0   3   2  372.52   15.21 
   0   3  -2  377.51   15.30 
   0   3   3  391.65   13.08 
   0   3  -3  346.87   13.20 
   0   3   3  413.37   13.37 
   0   3  -3  399.49   15.59 
   0   3   3  401.80   13.39 
   0   3  -3  413.35   13.13 
   0   3  -3  420.78   13.28 
   0   3  -3  411.33   13.22 
   0   3   3  394.43   14.08 
   0   3   3  416.52   13.75 
   0   3   3  420.85   13.39 
   0   3  -3  414.21   13.28 
   0   3  -3  410.05   13.26 
   0   3  -3  406.64   13.24 
   0   3  -4   64.02    3.55 
   0   3   4   65.41    3.69 
   0   3   4   72.27    4.26 
   0   3   4   66.96    3.59 
   0   3  -4   70.05    3.55 
   0   3   4   72.42    3.93 
   0   3   4   68.80    3.65 
   0   3  -4   67.40    5.29 
   0   3   4   69.16    3.86 
   0   3   4   66.66    3.26 
   0   3  -4   71.35    3.63 
   0   3  -4   65.28    3.42 
   0   3  -4   66.04    3.50 
   0   3   5  628.07   25.43 
   0   3  -5  634.95   25.38 
   0   3   5  641.82   25.54 
   0   3   5  620.37   25.15 
   0   3  -5  619.28   25.32 
   0   3  -5  640.00   25.42 
   0   3   5  625.56   26.55 
   0   3   5  633.89   26.21 
   0   3  -5  683.61   25.53 
   0   3   5  635.59   25.65 
   0   3   5  604.72   25.39 
   0   3  -5  625.58   27.89 
   0   3  -5  658.98   25.48 
   0   3  -6  238.44    9.98 
   0   3   6  233.26   10.16 
   0   3  -6  226.33    9.80 
   0   3  -6  240.58   10.14 
   0   3  -6  238.04   10.01 
   0   3  -6  227.18    9.90 
   0   3   6  234.81   10.28 
   0   3  -6  237.92   10.12 
   0   3  -6  240.23   10.15 
   0   3   6  224.33   10.06 
   0   3  -6  238.24   10.13 
   0   3   6  225.86   11.21 
   0   3   6  236.14    9.99 
   0   3   7  375.04   15.23 
   0   3  -7  362.56   15.19 
   0   3  -7  354.16   14.98 
   0   3   7  362.49   14.95 
   0   3  -7  370.98   15.20 
   0   3   7  371.36   15.38 
   0   3  -7  376.45   15.00 
   0   3  -7  349.31   15.08 
   0   3   7  354.05   15.13 
   0   3  -7  355.13   14.75 
   0   3   7  344.17   15.06 
   0   3   8  118.79    5.68 
   0   3   8  126.65    5.94 
   0   3   8  113.95    5.83 
   0   3   8  131.54    6.34 
   0   3  -8  114.09    6.06 
   0   3  -8  118.46    6.00 
   0   3  -8  113.87    6.04 
   0   3   8  117.20    6.11 
   0   3   8  120.35    6.14 
   0   3  -9   76.40    5.15 
   0   3  -9   82.76    5.08 
   0   3   9   91.38    5.18 
   0   3   9   99.26    5.14 
   0   3   9   80.38    4.71 
   0   3  -9   89.41    5.19 
   0   3   9   99.63    4.99 
   0   3   9   83.81    4.48 
   0   3   9   88.19    5.18 
   0   3  -9   87.28    5.09 
   0   3 -10  317.25   14.16 
   0   3  10  333.56   13.75 
   0   3  10  325.91   13.40 
   0   3 -10  302.20   13.99 
   0   3  10  319.66   13.85 
   0   3  10  347.21   13.96 
   0   3  10  309.60   13.57 
   0   3 -10  302.32   13.87 
   0   3  11   62.89    3.96 
   0   3  11   59.90    3.85 
   0   3 -11   58.39    4.73 
   0   3  11   56.53    4.07 
   0   3 -11   51.42    4.10 
   0   3  11   70.89    4.48 
   0   3  11   62.30    3.40 
   0   3 -11   62.40    4.67 
   0   3  12  625.67   24.94 
   0   3 -12  575.43   25.24 
   0   3  12  624.31   25.02 
   0   3 -12  592.29   25.78 
   0   3 -12  632.91   25.69 
   0   3  12  627.64   25.17 
   0   3 -13  164.91    8.66 
   0   3 -13  173.59    8.99 
   0   3  13  178.54    8.05 
   0   3 -13  165.44    8.16 
   0   3  13  174.98    7.90 
   0   3  13  178.05    7.84 
   0   3 -14    3.59    2.87 
   0   3  14    3.12    1.69 
   0   3  14    0.96    1.65 
   0   3 -14    0.69    3.46 
   0   3  14    0.07    1.40 
   0   3 -15   50.31    3.84 
   0   3  15   61.68    3.24 
   0   3  15   55.00    3.06 
   0   3 -15   62.73    4.64 
   0   3  16   19.36    1.42 
   0   3  16   19.57    1.49 
   0   3 -16   21.96    2.07 
   0   3 -16   21.64    2.99 
   0   3 -17   13.06    1.97 
   0   4   0   93.73    4.39 
   0   4   0   82.43    4.69 
   0   4   0   95.38    4.61 
   0   4   0   95.57    4.87 
   0   4   1   56.26    3.54 
   0   4   1   56.95    2.92 
   0   4  -1   57.45    3.38 
   0   4  -1   46.84    3.29 
   0   4  -1   53.38    3.50 
   0   4  -1   58.95    3.39 
   0   4  -1   57.72    3.19 
   0   4   1   52.64    3.55 
   0   4   1   59.64    3.58 
   0   4   1   58.46    3.25 
   0   4   1   54.09    3.36 
   0   4   2   66.09    3.78 
   0   4   2   66.64    3.54 
   0   4   2   65.29    4.08 
   0   4  -2   66.06    3.44 
   0   4   2   61.00    3.93 
   0   4   2   60.16    4.13 
   0   4  -2   69.72    3.88 
   0   4  -2   69.26    3.78 
   0   4  -2   68.78    3.71 
   0   4   2   64.92    3.90 
   0   4  -2   61.60    3.78 
   0   4  -3   37.73    2.74 
   0   4   3   32.93    3.14 
   0   4   3   37.08    2.47 
   0   4  -3   38.59    2.67 
   0   4  -3   39.42    2.83 
   0   4   3   36.38    2.71 
   0   4   3   37.67    3.15 
   0   4   3   34.44    2.97 
   0   4   4   86.25    4.24 
   0   4   4   85.40    4.75 
   0   4  -4   90.33    4.60 
   0   4   4   84.35    4.81 
   0   4  -4   85.47    4.63 
   0   4   4   90.61    4.90 
   0   4  -4   75.77    4.66 
   0   4   4   92.20    4.49 
   0   4  -4   84.40    4.61 
   0   4   5   43.84    3.87 
   0   4  -5   38.51    2.88 
   0   4  -5   41.21    3.14 
   0   4   5   41.47    3.06 
   0   4  -5   45.81    3.46 
   0   4   5   42.34    2.55 
   0   4   5   45.68    3.44 
   0   4  -5   49.78    3.38 
   0   4   5   41.47    2.89 
   0   4   5   39.56    3.33 
   0   4  -5   42.22    3.25 
   0   4  -6   87.46    5.11 
   0   4  -6   87.61    4.61 
   0   4  -6   89.70    4.93 
   0   4   6   89.61    5.12 
   0   4   6   90.10    4.82 
   0   4   6   84.05    5.18 
   0   4  -6  102.35    5.18 
   0   4   6   89.35    4.57 
   0   4  -7  236.25    9.72 
   0   4  -7  208.18    9.32 
   0   4   7  233.58    9.60 
   0   4  -7  187.20    9.90 
   0   4   7  218.87    9.26 
   0   4   7  172.84    9.67 
   0   4  -7  209.38    9.90 
   0   4   7  223.64    9.75 
   0   4   7  233.25   10.01 
   0   4   8   13.90    2.73 
   0   4  -8    9.62    1.80 
   0   4   8   12.04    2.87 
   0   4   8   14.50    2.83 
   0   4  -8    9.64    3.26 
   0   4  -8   10.82    3.05 
   0   4   8    6.91    2.06 
   0   4   8    9.03    1.42 
   0   4  -9  337.80   15.31 
   0   4  -9  344.35   15.28 
   0   4   9  352.77   14.91 
   0   4   9  363.64   14.79 
   0   4   9  337.79   14.16 
   0   4   9  342.37   14.48 
   0   4   9  346.37   14.88 
   0   4  10  189.63    8.88 
   0   4  10  192.60    8.63 
   0   4  10  200.13    9.12 
   0   4 -10  197.61    9.18 
   0   4  10  200.16    9.18 
   0   4 -10  208.08    9.66 
   0   4  11  169.42    7.54 
   0   4  11  176.53    8.10 
   0   4 -11  172.93    8.68 
   0   4  11  177.00    7.88 
   0   4 -11  160.67    8.21 
   0   4  11  173.98    8.14 
   0   4  12  156.63    7.02 
   0   4 -12  136.53    7.53 
   0   4 -12  153.71    8.26 
   0   4 -12  154.71    7.80 
   0   4  12  159.43    7.32 
   0   4  12  157.58    7.25 
   0   4 -13   15.28    2.80 
   0   4  13   13.63    2.01 
   0   4 -13   14.19    2.69 
   0   4  13   16.72    1.86 
   0   4  13   13.71    2.10 
   0   4 -13   17.45    3.37 
   0   4  14   34.84    2.32 
   0   4 -14   28.44    2.90 
   0   4 -14   34.06    3.46 
   0   4  14   34.21    2.15 
   0   4  15    6.57    0.91 
   0   4 -15    3.18    1.96 
   0   4 -15    5.95    2.51 
   0   4  15    6.68    1.04 
   0   4 -16    6.54    1.66 
   0   5   0    0.93    1.52 
   0   5   0   -1.30    2.68 
   0   5   0   -0.54    2.01 
   0   5   1  219.17   10.01 
   0   5  -1  237.03    9.95 
   0   5  -1  210.27   10.03 
   0   5   1  228.20    9.77 
   0   5  -1  231.76   10.06 
   0   5  -1  218.09    9.70 
   0   5   1  230.59   10.06 
   0   5  -1  231.58   10.08 
   0   5  -2  131.54    6.34 
   0   5   2  132.92    6.18 
   0   5   2  124.43    6.38 
   0   5   2  130.83    6.58 
   0   5   2  123.65    6.74 
   0   5   2  136.14    6.71 
   0   5  -2  117.04    6.40 
   0   5   3  106.26    5.80 
   0   5   3  109.33    5.35 
   0   5   3  110.67    6.17 
   0   5  -3  104.07    5.70 
   0   5   3  118.44    5.74 
   0   5  -3  100.22    5.33 
   0   5   4  108.02    5.73 
   0   5   4  113.12    5.72 
   0   5  -4  106.87    5.74 
   0   5   4  110.77    6.28 
   0   5   4  110.72    5.34 
   0   5  -4  110.48    6.03 
   0   5  -4  114.51    5.72 
   0   5   5  135.47    6.88 
   0   5  -5  124.23    6.55 
   0   5  -5  120.44    6.70 
   0   5   5  139.84    6.56 
   0   5   5  137.55    6.29 
   0   5   5  128.26    5.92 
   0   5  -5  118.30    6.31 
   0   5  -5  137.75    6.96 
   0   5  -5  130.26    6.54 
   0   5   6  202.92    9.04 
   0   5  -6  181.67    8.70 
   0   5  -6  164.46    8.87 
   0   5   6  173.97    8.78 
   0   5  -6  181.01    8.65 
   0   5   6  185.60    8.24 
   0   5   6  182.96    8.34 
   0   5  -6  182.30    8.31 
   0   5   7    3.62    1.92 
   0   5   7    5.59    2.87 
   0   5  -7    4.34    1.87 
   0   5   7    2.82    1.52 
   0   5   7    5.23    2.37 
   0   5  -7    6.70    2.95 
   0   5   7    6.06    2.49 
   0   5  -7    6.24    2.99 
   0   5  -7    1.95    1.95 
   0   5   8  183.89    8.20 
   0   5   8  165.01    8.30 
   0   5  -8  183.07    8.33 
   0   5   8  180.10    7.87 
   0   5   8  171.81    7.63 
   0   5  -8  162.54    7.70 
   0   5  -8  168.05    8.64 
   0   5  -9  148.38    7.95 
   0   5  -9  148.49    7.73 
   0   5   9  152.23    6.87 
   0   5   9  142.58    6.58 
   0   5  -9  149.22    7.32 
   0   5   9  128.99    6.23 
   0   5   9  151.12    7.01 
   0   5   9  149.80    7.15 
   0   5  10   50.80    3.49 
   0   5 -10   47.20    3.99 
   0   5  10   56.02    3.33 
   0   5  10   56.87    3.03 
   0   5 -10   49.61    4.62 
   0   5  10   56.00    3.80 
   0   5 -10   52.38    4.49 
   0   5 -11   45.11    4.14 
   0   5 -11   46.64    3.96 
   0   5  11   44.10    3.24 
   0   5 -11   53.18    4.61 
   0   5  11   50.21    2.59 
   0   5  11   49.05    3.13 
   0   5  11   52.64    3.01 
   0   5 -12   14.95    3.51 
   0   5 -12   14.97    2.82 
   0   5 -12   18.14    2.89 
   0   5  12   17.84    1.83 
   0   5 -13   40.92    3.16 
   0   5  13   44.34    2.40 
   0   5 -14   49.84    2.99 
   0   6   0  424.69   17.55 
   0   6   0  405.12   17.23 
   0   6  -1  187.15    9.04 
   0   6  -1  192.20    8.87 
   0   6   1  200.00    9.06 
   0   6  -1  192.12    8.62 
   0   6   1  196.51    8.72 
   0   6   2   19.42    2.83 
   0   6  -2   15.17    2.74 
   0   6   2   19.36    2.14 
   0   6   2   15.41    2.89 
   0   6  -2   20.01    2.44 
   0   6  -2   16.91    3.04 
   0   6  -2   24.82    2.86 
   0   6  -3  163.76    7.97 
   0   6   3  177.75    8.08 
   0   6   3  165.89    7.46 
   0   6  -3  166.52    8.06 
   0   6  -3  157.03    7.87 
   0   6   3  171.74    7.95 
   0   6   4   45.14    2.80 
   0   6   4   46.04    3.60 
   0   6   4   54.18    3.53 
   0   6  -4   49.33    3.50 
   0   6  -4   51.45    3.72 
   0   6  -5   53.07    3.97 
   0   6   5   51.88    3.34 
   0   6  -5   46.07    3.38 
   0   6   5   44.39    3.37 
   0   6  -5   45.37    3.11 
   0   6   6   61.14    3.57 
   0   6  -6   63.72    4.52 
   0   6  -6   61.09    3.74 
   0   6  -6   55.65    3.54 
   0   6   6   64.10    3.75 
   0   6   7   62.33    3.82 
   0   6  -7   48.92    3.05 
   0   6  -7   60.25    4.29 
   0   6   7   48.96    3.19 
   0   6   7   56.50    3.17 
   0   6  -7   54.72    3.62 
   0   6   8   86.93    4.17 
   0   6   8   81.47    4.24 
   0   6  -8   86.49    4.90 
   0   6  -8   85.34    5.45 
   0   6   8   94.00    4.57 
   0   6   9   52.97    2.72 
   0   6   9   53.31    2.86 
   0   6  -9   57.25    3.75 
   0   6   9   56.39    3.18 
   0   6  10  112.22    4.88 
   0   6 -10  112.35    5.63 
   0   6 -11   38.06    2.64 
   0   7   0    0.38    1.76 
   0   7   1   32.27    2.55 
   0   7  -1   29.46    2.51 
   0   7  -1   34.19    2.65 
   0   7   2   11.38    1.74 
   0   7  -2    8.13    1.87 
   0   7   2    7.90    1.66 
   0   7  -3   49.47    3.01 
   0   7   3   45.09    2.77 
   0   7   3   51.65    2.92 
   0   7   4   -0.06    1.23 
   0   7   4    2.23    1.19 
   0   7  -4    3.06    1.40 
   0   7  -5   30.16    2.05 
   0   7   5   33.53    2.09 
   0   7   5   34.82    1.96 
   0   7   6   34.86    1.94 
   0   7   6   34.85    1.80 
  -1  -7   7    5.74    1.25 
  -1  -7   7    4.61    1.28 
  -1  -7   7    6.40    1.31 
   1  -7  -7    3.80    1.80 
  -1  -7   6    2.60    1.51 
  -1  -7   6    0.20    1.43 
   1  -7  -6   -0.36    1.96 
  -1  -7   6    1.41    1.44 
  -1  -7   5   26.69    2.43 
   1  -7  -5   22.53    2.69 
  -1  -7   5   24.57    2.41 
  -1  -7   5   24.81    2.31 
  -1  -7   4   39.19    2.96 
   1  -7  -4   35.40    3.23 
  -1  -7   4   38.30    3.01 
   1  -7  -3   17.42    2.83 
  -1  -7   3   22.09    2.71 
  -1  -7   3   17.54    2.60 
   1  -7  -2   32.93    3.14 
  -1  -7   2   30.13    2.89 
  -1  -7   2   31.05    3.14 
  -1  -7   1  246.76   11.15 
   1  -7  -1  246.75   10.91 
  -1  -7   1  220.73   10.83 
   1  -7   0  304.22   13.43 
  -1  -7   0  296.39   13.62 
   1  -7   0  340.71   13.85 
  -1  -7   0  337.58   13.96 
  -1  -7  -1  110.59    5.86 
   1  -7   1   99.95    5.59 
  -1  -7  -1  111.19    6.06 
  -1  -7  -1   97.85    5.20 
   1  -7   1  117.78    5.59 
  -1  -7  -2  126.57    6.17 
  -1  -7  -2  122.47    6.57 
   1  -7   2  123.62    6.25 
   1  -7   2  136.22    6.15 
  -1  -7  -3   56.19    4.21 
   1  -7   3   70.18    3.68 
  -1  -7  -3   65.04    3.86 
   1  -7   3   60.62    3.65 
  -1  -7  -4    9.34    2.53 
   1  -7   4    9.26    1.60 
   1  -7   4   12.24    2.17 
  -1  -7  -4    7.01    2.14 
   1  -7   4    8.80    2.47 
  -1  -7  -5   34.35    3.08 
   1  -7   5   29.83    2.75 
  -1  -7  -5   37.76    2.85 
   1  -7   5   36.01    2.59 
  -1  -7  -5   31.82    2.37 
   1  -7   6    5.91    1.48 
   1  -7   6    7.83    1.77 
  -1  -7  -6    5.82    2.18 
  -1  -7  -6    7.54    1.79 
   1  -7   7    2.58    1.06 
   1  -7   7    2.13    1.23 
   1  -6 -11   41.16    2.97 
  -1  -6  11   57.76    2.99 
  -1  -6  11   52.52    2.70 
  -1  -6  11   57.26    3.00 
   1  -6 -11   47.38    3.60 
  -1  -6  10  141.49    6.48 
   1  -6 -10  130.37    6.91 
  -1  -6  10  148.52    6.51 
   1  -6 -10  126.30    6.42 
  -1  -6  10  135.75    6.12 
  -1  -6  10  141.00    6.43 
  -1  -6   9   10.07    2.27 
   1  -6  -9   12.23    2.21 
  -1  -6   9   14.21    2.61 
  -1  -6   9   12.94    2.45 
   1  -6  -9    8.85    3.00 
  -1  -6   8   86.98    5.24 
  -1  -6   8   83.03    4.47 
  -1  -6   8  103.45    5.44 
  -1  -6   8   99.86    5.33 
   1  -6  -8   83.38    4.83 
   1  -6  -8   99.34    5.56 
  -1  -6   7   34.76    3.67 
   1  -6  -7   30.13    2.88 
   1  -6  -7   28.94    3.65 
  -1  -6   7   35.01    3.68 
  -1  -6   7   27.86    3.41 
  -1  -6   7   29.02    3.47 
  -1  -6   6    1.96    2.97 
   1  -6  -6    3.59    2.80 
  -1  -6   6    4.41    3.08 
   1  -6  -5   59.41    4.32 
  -1  -6   5   52.34    4.74 
  -1  -6   4   14.11    3.72 
   1  -6  -4   10.64    2.74 
  -1  -6   4   10.96    3.12 
  -1  -6   3   73.67    5.76 
   1  -6  -3   72.69    4.46 
   1  -6  -3   71.17    4.76 
  -1  -6   3   70.31    5.15 
  -1  -6   2  219.10   10.22 
  -1  -6   2  217.72   10.87 
   1  -6  -2  235.51   10.33 
  -1  -6   1   81.31    4.95 
   1  -6  -1   75.42    4.58 
  -1  -6   1   74.77    5.59 
  -1  -6   0   74.79    5.69 
   1  -6   0   78.58    5.32 
  -1  -6   0   78.37    4.75 
  -1  -6   0   82.90    5.22 
  -1  -6  -1   51.54    3.94 
  -1  -6  -1   54.41    4.37 
   1  -6   1   56.35    4.34 
   1  -6   2    9.40    3.48 
   1  -6   2   10.16    2.95 
  -1  -6  -2    8.66    3.13 
  -1  -6  -2   10.93    2.94 
   1  -6   3   67.75    5.17 
  -1  -6  -3   77.60    5.21 
   1  -6   3   72.65    4.68 
  -1  -6  -3   72.42    5.00 
  -1  -6  -4   67.81    4.12 
   1  -6   4   68.17    4.26 
  -1  -6  -4   67.79    4.94 
   1  -6   4   63.78    4.80 
   1  -6   4   64.62    4.77 
  -1  -6  -5  124.50    6.28 
  -1  -6  -5  117.47    6.89 
   1  -6   5  121.55    6.60 
   1  -6   5  125.73    6.69 
  -1  -6  -6   -2.61    3.31 
   1  -6   6    0.21    2.32 
   1  -6   6   -1.37    2.50 
   1  -6   6    1.95    3.04 
  -1  -6  -6    0.73    2.34 
  -1  -6  -7   18.22    2.84 
   1  -6   7   20.67    2.71 
  -1  -6  -7   15.08    3.42 
   1  -6   7   17.35    2.99 
  -1  -6  -8  153.15    7.94 
  -1  -6  -8  144.66    7.40 
   1  -6   8  156.02    7.25 
   1  -6   8  161.72    7.48 
  -1  -6  -9   28.96    2.96 
  -1  -6  -9   25.61    3.49 
   1  -6   9   30.67    2.48 
   1  -6   9   32.42    2.85 
  -1  -6 -10    4.90    2.13 
   1  -6  10    2.59    1.52 
   1  -6  10    2.74    1.48 
   1  -6  10    1.98    1.26 
   1  -6  10    4.98    1.64 
   1  -6  10    1.90    1.21 
  -1  -6 -10    0.42    2.53 
  -1  -6 -11   15.77    2.31 
  -1  -6 -11   13.18    1.94 
  -1  -6 -11   14.47    2.43 
   1  -6  11   17.54    1.48 
   1  -6  11   13.45    1.34 
   1  -5 -14   55.36    3.67 
   1  -5 -14   50.47    3.37 
  -1  -5  13  100.93    4.94 
  -1  -5  13  112.94    5.01 
  -1  -5  13   85.70    4.32 
   1  -5 -13   96.67    5.45 
  -1  -5  13   98.30    4.53 
   1  -5 -13  103.38    5.73 
  -1  -5  12   14.81    1.91 
   1  -5 -12   16.21    2.43 
  -1  -5  12   17.86    2.66 
   1  -5 -12   19.04    3.22 
  -1  -5  12   19.25    2.24 
  -1  -5  12   18.63    2.60 
   1  -5 -11  160.98    8.38 
  -1  -5  11  185.99    8.35 
  -1  -5  11  180.72    8.23 
   1  -5 -11  152.82    7.69 
  -1  -5  11  156.76    7.62 
  -1  -5  11  174.54    8.20 
  -1  -5  10   55.52    4.35 
   1  -5 -10   45.40    4.04 
  -1  -5  10   51.72    4.23 
  -1  -5  10   46.07    3.18 
  -1  -5  10   50.23    4.38 
  -1  -5   9  121.85    6.74 
   1  -5  -9  107.02    6.27 
  -1  -5   9  116.84    6.75 
  -1  -5   9  117.04    6.91 
  -1  -5   9  112.06    5.81 
  -1  -5   8   36.06    4.19 
  -1  -5   8   37.57    4.48 
   1  -5  -8   36.98    3.49 
  -1  -5   8   27.25    4.15 
  -1  -5   8   24.05    4.13 
   1  -5  -7   44.31    3.61 
  -1  -5   7   43.23    4.75 
  -1  -5   7   47.18    4.84 
  -1  -5   6   69.40    5.10 
  -1  -5   6   76.82    5.63 
   1  -5  -6   65.99    4.27 
  -1  -5   5   47.81    5.14 
  -1  -5   5   40.15    4.51 
  -1  -5   4  317.81   14.06 
  -1  -5   4  351.12   15.01 
  -1  -5   4  320.65   14.58 
   1  -5  -4  308.25   13.76 
  -1  -5   3   95.74    5.73 
  -1  -5   3  112.75    6.47 
  -1  -5   2  267.10   12.08 
  -1  -5   2  264.57   11.81 
  -1  -5   2  266.48   12.49 
   1  -5  -1  112.46    5.86 
  -1  -5   1  106.03    6.29 
  -1  -5   1  120.15    6.23 
  -1  -5   0  177.88    8.67 
  -1  -5   0  169.52    8.58 
   1  -5   0  183.91    8.38 
   1  -5   1  168.35    7.97 
  -1  -5  -1  166.83    7.77 
  -1  -5  -1  167.41    8.39 
   1  -5   2  221.27   10.50 
  -1  -5  -2  215.17    9.95 
  -1  -5  -2  226.10   10.54 
  -1  -5  -3  173.96    8.24 
   1  -5   3  168.82    8.68 
   1  -5   4   28.25    4.14 
  -1  -5  -4   40.33    3.14 
   1  -5   4   33.22    3.60 
  -1  -5  -4   33.84    3.71 
  -1  -5  -5    3.11    2.30 
   1  -5   5    2.81    2.97 
  -1  -5  -5    0.13    2.94 
   1  -5   5    2.03    2.51 
  -1  -5  -6   43.55    3.71 
  -1  -5  -6   37.51    4.17 
   1  -5   6   42.25    4.01 
   1  -5   6   38.27    4.18 
  -1  -5  -7  363.07   15.77 
   1  -5   7  355.13   15.47 
   1  -5   7  347.51   15.53 
   1  -5   7  353.68   15.87 
  -1  -5  -7  349.87   15.47 
  -1  -5  -8    2.94    2.03 
   1  -5   8    3.03    3.21 
   1  -5   8    6.28    2.82 
  -1  -5  -8    3.02    3.43 
  -1  -5  -8    7.79    3.00 
   1  -5   9   75.71    4.80 
  -1  -5  -9   69.06    5.16 
  -1  -5  -9   64.77    4.22 
  -1  -5  -9   76.97    5.63 
   1  -5   9   73.09    5.08 
  -1  -5 -10   67.13    5.62 
  -1  -5 -10   71.36    4.43 
   1  -5  10   83.36    4.97 
  -1  -5 -10   71.07    5.16 
   1  -5  10   74.67    4.67 
   1  -5  11   11.94    2.40 
   1  -5  11   10.68    2.34 
  -1  -5 -11   12.72    3.62 
  -1  -5 -11   10.92    3.06 
   1  -5  11   13.97    2.29 
   1  -5  11   13.49    2.65 
   1  -5  11   14.84    2.59 
  -1  -5 -11   12.97    2.53 
   1  -5  12    1.39    1.61 
   1  -5  12    0.90    2.00 
   1  -5  12   -0.06    1.51 
  -1  -5 -12    1.52    3.20 
  -1  -5 -12    0.45    2.71 
   1  -5  12   -2.31    1.77 
  -1  -5 -12    2.50    1.93 
  -1  -5 -13   95.60    5.29 
   1  -5  13   99.29    4.54 
   1  -5  13  103.82    4.62 
  -1  -5 -13   93.78    5.44 
  -1  -5 -13   89.70    4.73 
   1  -4 -16    4.50    1.84 
   1  -4 -16    5.74    1.99 
   1  -4 -15   40.70    2.89 
   1  -4 -15   44.90    3.52 
  -1  -4  15   39.97    2.31 
   1  -4 -14   52.61    4.83 
  -1  -4  14   46.54    2.83 
  -1  -4  14   52.60    3.65 
  -1  -4  14   53.47    3.21 
   1  -4 -14   53.33    4.33 
  -1  -4  14   45.79    2.91 
  -1  -4  13   32.14    2.81 
   1  -4 -13   25.82    3.99 
   1  -4 -13   30.36    4.60 
  -1  -4  13   30.99    2.65 
   1  -4 -13   32.97    3.35 
  -1  -4  13   38.61    3.48 
  -1  -4  13   29.71    3.53 
  -1  -4  12  249.47   10.93 
   1  -4 -12  231.03   11.12 
   1  -4 -12  221.30   10.57 
  -1  -4  12  232.57   10.40 
  -1  -4  12  232.85   10.29 
  -1  -4  12  247.72   10.90 
  -1  -4  12  218.24    9.98 
  -1  -4  12  229.23   10.75 
   1  -4 -11   36.87    4.17 
  -1  -4  11   36.30    2.99 
  -1  -4  11   45.62    4.28 
  -1  -4  11   30.17    3.83 
  -1  -4  11   38.33    4.22 
  -1  -4  11   35.04    2.88 
   1  -4 -11   38.03    3.51 
   1  -4 -10   12.68    3.08 
   1  -4 -10   15.04    2.52 
  -1  -4  10   16.65    3.87 
  -1  -4  10   16.79    3.70 
  -1  -4  10   12.02    3.46 
  -1  -4  10   15.09    2.47 
  -1  -4   9   68.31    5.08 
   1  -4  -9   68.10    4.74 
  -1  -4   9   77.37    5.34 
  -1  -4   9   63.89    4.42 
  -1  -4   9   65.40    5.25 
   1  -4  -9   69.73    4.16 
  -1  -4   8  130.24    7.19 
   1  -4  -8  122.20    6.35 
  -1  -4   8  116.81    7.10 
  -1  -4   8  115.03    7.10 
  -1  -4   8  126.30    7.27 
  -1  -4   7  297.34   13.46 
   1  -4  -7  293.39   12.71 
  -1  -4   6   64.87    4.86 
   1  -4  -6   66.87    3.89 
  -1  -4   6   64.86    5.25 
  -1  -4   5   20.90    2.88 
  -1  -4   5   17.47    3.23 
  -1  -4   5   23.03    4.14 
  -1  -4   4  124.67    6.25 
  -1  -4   4  118.75    6.64 
  -1  -4   3   45.88    3.32 
  -1  -4   3   39.23    3.43 
  -1  -4   3   37.87    3.76 
  -1  -4   2   72.61    4.19 
  -1  -4   2   65.60    4.22 
  -1  -4   1  348.93   14.73 
  -1  -4   0  707.96   28.64 
  -1  -4   0  723.50   28.94 
  -1  -4  -1   11.62    1.95 
  -1  -4  -2   50.49    3.51 
  -1  -4  -2   49.83    3.06 
   1  -4   3  361.02   15.44 
  -1  -4  -3  362.33   15.13 
  -1  -4  -4   93.71    5.14 
   1  -4   4   97.21    5.42 
   1  -4   5   21.81    2.86 
  -1  -4  -5   25.01    2.57 
   1  -4   5   20.22    3.53 
  -1  -4  -5   14.83    2.69 
  -1  -4  -6  412.68   17.01 
  -1  -4  -6  420.47   17.39 
   1  -4   6  397.52   17.51 
   1  -4   6  385.76   17.37 
  -1  -4  -7  171.76    8.01 
  -1  -4  -7  169.24    8.60 
   1  -4   7  168.95    8.32 
   1  -4   7  147.18    8.30 
  -1  -4  -8  240.74   10.90 
   1  -4   8  230.47   11.24 
  -1  -4  -8  222.30   11.28 
   1  -4   8  243.98   11.09 
  -1  -4  -9  314.49   14.03 
  -1  -4  -9  295.34   13.52 
   1  -4   9  297.17   13.66 
   1  -4   9  303.37   13.76 
  -1  -4 -10   26.24    4.67 
  -1  -4 -10   29.20    3.88 
   1  -4  10   29.83    3.76 
   1  -4  10   34.42    3.79 
   1  -4  11  189.63    9.09 
   1  -4  11  177.17    8.67 
   1  -4  11  173.41    8.77 
  -1  -4 -11  173.80    8.60 
   1  -4  11  182.75    8.90 
  -1  -4 -11  192.95    9.89 
  -1  -4 -11  185.56    9.24 
   1  -4  12   48.71    3.74 
   1  -4  12   46.23    3.70 
   1  -4  12   45.89    3.78 
   1  -4  12   41.59    3.50 
  -1  -4 -12   42.57    3.65 
  -1  -4 -12   54.72    4.72 
  -1  -4 -12   49.00    5.01 
   1  -4  13  165.56    7.71 
  -1  -4 -13  168.31    8.49 
   1  -4  13  166.94    7.75 
   1  -4  13  156.99    7.40 
  -1  -4 -13  151.87    7.74 
   1  -4  13  169.02    7.62 
  -1  -4 -14  128.65    6.77 
  -1  -4 -14  122.16    6.17 
  -1  -4 -14  135.28    7.07 
   1  -4  14  115.96    5.65 
   1  -4  14  130.72    5.92 
   1  -4  14  137.30    5.95 
  -1  -4 -15   41.01    3.28 
  -1  -4 -15   40.57    3.46 
  -1  -4 -15   39.81    3.16 
   1  -4  15   38.34    2.22 
   1  -3 -17    6.58    2.25 
   1  -3 -17    7.28    2.12 
  -1  -3  16   33.49    2.33 
   1  -3 -16   33.96    3.86 
   1  -3 -16   33.83    3.03 
  -1  -3  15   90.27    4.65 
   1  -3 -15  106.85    6.45 
  -1  -3  15  101.63    5.02 
   1  -3 -15   90.30    5.50 
   1  -3 -15  100.15    6.00 
   1  -3 -14   55.76    4.96 
   1  -3 -14   63.25    4.49 
  -1  -3  14   58.45    3.61 
   1  -3 -14   61.36    5.37 
  -1  -3  14   62.97    4.00 
  -1  -3  14   59.11    3.71 
  -1  -3  13  113.75    5.98 
   1  -3 -13  118.33    6.45 
  -1  -3  13  114.25    5.84 
  -1  -3  13  116.17    5.67 
  -1  -3  13  107.70    5.53 
  -1  -3  13  121.51    6.68 
   1  -3 -13  112.77    7.37 
   1  -3 -13  122.43    6.90 
  -1  -3  12  109.86    6.60 
  -1  -3  12  107.16    5.49 
  -1  -3  12  102.92    5.72 
  -1  -3  12  108.87    6.20 
  -1  -3  12  104.53    5.49 
  -1  -3  12  109.41    5.73 
   1  -3 -12  110.07    6.09 
   1  -3 -12  110.43    6.46 
   1  -3 -11  306.04   13.69 
   1  -3 -11  291.54   13.42 
  -1  -3  11  296.83   13.21 
  -1  -3  11  345.54   14.19 
  -1  -3  11  321.11   13.93 
  -1  -3  11  306.51   13.26 
   1  -3 -10  381.86   16.48 
  -1  -3  10  378.74   16.68 
  -1  -3  10  386.75   16.25 
   1  -3 -10  381.30   16.22 
  -1  -3  10  392.27   16.83 
   1  -3  -9   36.54    2.92 
  -1  -3   9   42.89    3.97 
  -1  -3   9   38.19    3.40 
  -1  -3   9   37.20    4.10 
  -1  -3   8  171.73    8.34 
  -1  -3   8  161.80    8.31 
  -1  -3   8  165.89    8.19 
   1  -3  -8  168.04    7.47 
  -1  -3   7  405.93   15.98 
  -1  -3   7  336.55   15.83 
   1  -3  -6  705.18   30.46 
  -1  -3   6  719.40   28.92 
  -1  -3   6  700.09   28.69 
  -1  -3   5  734.85   31.46 
  -1  -3   5  737.99   30.01 
  -1  -3   5  773.71   30.29 
   1  -3  -5  751.55   31.60 
   1  -3  -5  664.18   32.50 
  -1  -3   5  749.46   30.37 
   1  -3  -5  791.76   32.67 
  -1  -3   5  784.97   31.88 
  -1  -3   5  743.17   33.26 
  -1  -3   4  188.93    8.67 
   1  -3  -4  204.64    9.58 
  -1  -3   4  210.93    9.98 
  -1  -3   4  189.93   11.17 
   1  -3  -4  204.29   10.50 
  -1  -3   4  185.68    8.45 
  -1  -3   4  189.78    9.86 
   1  -3  -3   63.90    5.24 
   1  -3  -3   79.83    4.47 
  -1  -3   3   72.62    4.79 
  -1  -3   3   68.95    3.84 
  -1  -3   3   74.24    6.05 
  -1  -3   2  178.94    7.96 
   1  -3  -2  191.02    8.37 
   1  -3  -2  182.78    7.67 
   1  -3  -2  185.19    9.72 
  -1  -3   2  179.38    9.00 
   1  -3  -1  100.06    6.15 
   1  -3  -1   84.81    4.25 
  -1  -3   1   98.03    5.31 
   1  -3   0   20.35    2.02 
  -1  -3   0   21.20    2.41 
   1  -3   0   26.14    3.45 
  -1  -3   0   19.33    3.27 
   1  -3   1  206.58    9.43 
  -1  -3  -1  203.42    9.31 
   1  -3   2   50.32    4.93 
   1  -3   2   47.77    3.46 
  -1  -3  -2   46.08    2.99 
  -1  -3  -3  171.81    8.65 
   1  -3   3  168.04    9.72 
  -1  -3  -3  154.65    9.29 
   1  -3   3  175.84    8.52 
   1  -3   4   28.90    4.21 
   1  -3   4   33.04    3.17 
  -1  -3  -4   32.61    3.94 
  -1  -3  -4   24.96    3.22 
  -1  -3  -4   29.19    2.25 
   1  -3   4   35.96    2.57 
   1  -3   5   70.28    6.07 
   1  -3   5   60.26    3.70 
  -1  -3  -5   73.00    5.47 
  -1  -3  -5   70.32    3.46 
   1  -3   5   67.93    4.14 
  -1  -3  -5   70.11    3.82 
   1  -3   5   61.29    4.66 
  -1  -3  -6  444.70   17.40 
  -1  -3  -6  423.48   17.10 
   1  -3   6  386.14   17.41 
   1  -3   6  414.91   17.56 
   1  -3   7   83.39    4.91 
   1  -3   7   78.26    4.76 
  -1  -3  -7   81.79    4.45 
  -1  -3  -7   83.49    4.85 
  -1  -3  -8   25.42    3.44 
   1  -3   8   21.83    3.20 
  -1  -3  -8   21.41    2.81 
  -1  -3  -8   21.97    2.45 
   1  -3   8   17.90    3.72 
   1  -3   8   22.70    3.28 
   1  -3   9  395.16   16.22 
  -1  -3  -9  393.46   16.30 
  -1  -3  -9  357.19   15.87 
  -1  -3  -9  377.60   15.70 
   1  -3   9  388.02   16.22 
  -1  -3 -10  877.89   34.87 
  -1  -3 -10  877.13   34.66 
  -1  -3 -10  879.81   35.16 
   1  -3  10  882.47   34.91 
   1  -3  10  886.67   34.99 
   1  -3  11  193.14    9.34 
   1  -3  11  191.67    9.50 
  -1  -3 -11  202.46    9.58 
   1  -3  11  200.93    9.26 
   1  -3  11  192.64    9.33 
   1  -3  11  156.30    9.53 
  -1  -3 -11  197.09    9.26 
   1  -3  11  198.07    9.33 
  -1  -3 -11  198.00    9.92 
  -1  -3 -12   44.32    3.95 
  -1  -3 -12   43.43    4.50 
   1  -3  12   41.29    3.71 
   1  -3  12   41.19    4.38 
   1  -3  12   39.23    3.73 
   1  -3  12   43.26    3.93 
  -1  -3 -12   50.86    5.05 
   1  -3  12   45.19    4.06 
   1  -3  13  137.14    6.39 
  -1  -3 -13  134.69    8.17 
   1  -3  13  137.25    6.86 
  -1  -3 -13  133.59    8.05 
   1  -3  13  136.07    6.72 
  -1  -3 -13  142.71    7.17 
   1  -3  13  138.38    7.07 
   1  -3  13  118.96    7.29 
   1  -3  13  127.87    6.14 
   1  -3  13  129.49    6.83 
  -1  -3 -14   41.24    4.79 
   1  -3  14   34.33    2.97 
   1  -3  14   32.40    3.03 
   1  -3  14   33.64    2.87 
  -1  -3 -14   37.40    3.60 
   1  -3  14   32.44    2.44 
   1  -3  15   25.86    2.20 
  -1  -3 -15   29.47    3.07 
   1  -3  15   24.66    2.36 
  -1  -3 -15   34.00    3.81 
  -1  -3 -15   31.87    4.02 
  -1  -3 -16   16.45    2.85 
  -1  -3 -16   24.99    2.98 
  -1  -3 -16   17.42    2.53 
  -1  -3 -16   16.84    2.22 
   1  -3  16   19.64    1.66 
  -1  -3 -17   78.74    4.10 
   1  -2 -18   20.01    2.26 
   1  -2 -18   24.74    2.39 
   1  -2 -17   25.33    3.37 
   1  -2 -17   22.28    3.08 
  -1  -2  17   20.38    1.85 
  -1  -2  16   32.36    2.21 
  -1  -2  16   34.27    2.79 
   1  -2 -16   30.19    4.00 
   1  -2 -16   33.94    4.33 
   1  -2 -15    5.58    4.22 
  -1  -2  15    6.14    1.70 
   1  -2 -15    8.97    3.79 
   1  -2 -15    6.98    4.15 
  -1  -2  15    7.54    2.40 
  -1  -2  14  186.88    8.58 
  -1  -2  14  182.93    8.08 
  -1  -2  14  169.50    8.01 
   1  -2 -14  181.85    9.39 
   1  -2 -14  182.34    9.70 
  -1  -2  14  180.57    8.24 
  -1  -2  13   21.89    2.41 
  -1  -2  13   26.14    2.73 
  -1  -2  13   21.45    2.68 
   1  -2 -13   29.31    3.93 
  -1  -2  13   25.33    2.47 
   1  -2 -13   32.74    4.44 
   1  -2 -12  370.93   15.89 
  -1  -2  12  351.89   15.66 
  -1  -2  12  341.31   14.94 
   1  -2 -12  351.30   15.57 
  -1  -2  12  367.88   15.05 
   1  -2 -12  360.64   15.33 
  -1  -2  12  343.70   15.02 
  -1  -2  12  360.47   15.11 
  -1  -2  11  247.80   10.67 
  -1  -2  11  240.78   10.67 
  -1  -2  11  240.57   11.07 
   1  -2 -11  246.06   10.76 
  -1  -2  11  254.59   11.28 
   1  -2 -11  232.07   11.02 
  -1  -2  11  241.84   10.70 
  -1  -2  11  235.49   10.73 
   1  -2 -10   90.33    5.14 
   1  -2 -10   97.05    4.87 
  -1  -2  10   86.21    4.81 
  -1  -2  10   82.30    4.81 
  -1  -2  10   92.21    5.39 
  -1  -2  10   95.25    5.60 
  -1  -2   9  603.94   24.39 
  -1  -2   9  575.15   23.98 
   1  -2  -9  589.11   23.85 
   1  -2  -9  610.15   24.06 
  -1  -2   9  582.43   24.23 
   1  -2  -8    7.18    2.62 
   1  -2  -8    3.26    1.39 
  -1  -2   8    0.87    2.03 
  -1  -2   8    6.65    1.89 
  -1  -2   8    4.80    2.03 
  -1  -2   7   32.07    2.72 
   1  -2  -7   34.95    3.69 
  -1  -2   7   36.81    2.99 
  -1  -2   7   29.31    2.60 
   1  -2  -7   35.07    3.66 
   1  -2  -7   34.94    4.46 
  -1  -2   7   35.54    2.96 
  -1  -2   6   45.35    3.74 
  -1  -2   6   44.71    3.07 
   1  -2  -6   47.18    4.32 
   1  -2  -6   47.09    3.80 
  -1  -2   6   46.43    3.41 
   1  -2  -6   44.78    4.69 
   1  -2  -6   47.12    4.04 
   1  -2  -5  215.79   10.48 
   1  -2  -5  183.16   10.54 
   1  -2  -5  210.37    9.95 
  -1  -2   5  210.35   11.06 
  -1  -2   5  202.45    9.69 
  -1  -2   5  219.81   10.08 
   1  -2  -5  205.48    9.74 
  -1  -2   4  660.10   27.71 
   1  -2  -4  689.57   27.03 
   1  -2  -4  673.88   26.28 
  -1  -2   4  670.87   26.67 
   1  -2  -4  605.91   25.15 
  -1  -2   4  733.26   26.79 
   1  -2  -3  424.28   17.26 
   1  -2  -3  412.41   17.95 
  -1  -2   3  422.28   18.62 
  -1  -2   3  387.88   17.79 
  -1  -2   3  440.96   17.83 
   1  -2  -2 1201.84   46.92 
   1  -2  -2 1196.76   47.14 
   1  -2  -2 1135.00   47.83 
  -1  -2   2 1209.93   47.64 
   1  -2  -1 1002.09   40.82 
   1  -2  -1 1045.94   39.90 
   1  -2  -1  976.49   39.73 
  -1  -2   1 1041.09   40.50 
   1  -2   0  563.61   22.92 
   1  -2   0  624.73   23.10 
  -1  -2   0  632.54   23.49 
   1  -2   0  539.73   22.55 
   1  -2   0  612.47   23.94 
  -1  -2  -1  785.06   32.14 
   1  -2   1  820.64   32.17 
  -1  -2  -2  953.27   38.59 
   1  -2   2 1070.39   40.29 
  -1  -2  -2 1057.27   40.24 
  -1  -2  -2 1002.99   39.18 
  -1  -2  -2  978.08   39.60 
  -1  -2  -3 1002.91   40.79 
  -1  -2  -3 1038.89   41.22 
  -1  -2  -3 1001.52   39.84 
   1  -2   3 1002.13   41.28 
   1  -2   4  771.42   31.94 
   1  -2   4  727.78   30.29 
  -1  -2  -4  780.18   31.53 
  -1  -2  -4  801.56   31.78 
  -1  -2  -4  799.10   30.49 
  -1  -2  -4  722.08   30.48 
   1  -2   5   22.85    2.01 
  -1  -2  -5   29.66    3.35 
  -1  -2  -5   26.18    3.12 
  -1  -2  -5   24.67    2.29 
   1  -2   5   25.40    2.23 
  -1  -2  -6  953.70   38.87 
  -1  -2  -6 1003.18   37.96 
  -1  -2  -6  911.93   39.01 
  -1  -2  -6  919.53   40.01 
  -1  -2  -6  988.17   37.98 
   1  -2   6  920.08   38.06 
   1  -2   6  949.49   38.20 
  -1  -2  -6  998.26   40.25 
  -1  -2  -6  951.72   39.94 
   1  -2   6  946.10   38.64 
  -1  -2  -7   95.02    7.44 
  -1  -2  -7  101.18    4.62 
   1  -2   7   90.22    5.20 
   1  -2   7  102.65    5.51 
   1  -2   7   97.49    5.18 
   1  -2   7   98.24    5.11 
  -1  -2  -7  105.04    5.86 
   1  -2   7  100.28    6.06 
  -1  -2  -7  103.60    4.89 
  -1  -2  -7   94.35    6.81 
  -1  -2  -7  105.70    6.85 
  -1  -2  -7   93.99    6.76 
  -1  -2  -7   98.15    6.02 
  -1  -2  -7  101.47    4.98 
  -1  -2  -8  348.81   17.67 
  -1  -2  -8  398.79   16.24 
   1  -2   8  389.28   16.31 
   1  -2   8  386.08   16.52 
   1  -2   8  402.05   16.37 
  -1  -2  -8  386.47   16.14 
   1  -2   9   54.23    4.14 
   1  -2   9   53.44    4.03 
   1  -2   9   59.70    4.11 
  -1  -2  -9   54.35    4.02 
  -1  -2  -9   55.18    3.77 
   1  -2  10   42.59    3.53 
   1  -2  10   46.84    4.01 
   1  -2  10   47.65    4.00 
   1  -2  10   49.32    3.73 
  -1  -2 -10   49.82    4.19 
   1  -2  10   45.11    3.65 
   1  -2  10   50.16    4.03 
  -1  -2 -10   40.40    3.80 
   1  -2  11  650.61   26.05 
  -1  -2 -11  667.27   26.39 
  -1  -2 -11  598.82   26.42 
   1  -2  11  620.08   26.14 
   1  -2  11  634.62   26.35 
  -1  -2 -11  629.00   26.46 
   1  -2  11  616.11   25.96 
   1  -2  11  644.67   26.01 
   1  -2  12   23.39    3.55 
   1  -2  12   25.45    2.40 
   1  -2  12   22.96    2.85 
  -1  -2 -12   27.87    4.36 
   1  -2  12   27.85    3.05 
   1  -2  12   24.85    2.84 
   1  -2  12   20.63    3.79 
  -1  -2 -12   33.86    4.18 
   1  -2  12   24.21    3.22 
  -1  -2 -12   25.35    4.37 
   1  -2  13   95.12    5.63 
   1  -2  13  105.65    5.36 
  -1  -2 -13   98.31    7.02 
   1  -2  13  104.59    5.69 
   1  -2  13   97.79    4.96 
   1  -2  13   99.36    5.66 
  -1  -2 -13  112.15    6.79 
  -1  -2 -13  101.99    6.96 
   1  -2  14    2.66    2.11 
  -1  -2 -14    6.34    4.46 
  -1  -2 -14    5.30    3.94 
   1  -2  14    1.93    2.20 
  -1  -2 -14   -2.31    3.83 
   1  -2  14    4.14    2.31 
  -1  -2 -14    6.62    4.37 
   1  -2  14    2.25    1.89 
   1  -2  15    5.30    2.09 
   1  -2  15    3.89    1.99 
   1  -2  15    3.06    1.57 
  -1  -2 -15    9.33    3.92 
  -1  -2 -15    2.56    3.57 
  -1  -2 -15    6.24    3.65 
  -1  -2 -16   23.48    3.36 
  -1  -2 -16   25.69    3.56 
   1  -2  16   19.41    2.09 
  -1  -2 -16   22.72    3.65 
   1  -2  16   17.34    1.86 
   1  -2  17   72.92    3.49 
  -1  -2 -17   90.31    4.59 
  -1  -2 -17   86.65    4.64 
  -1  -2 -17   62.31    3.94 
   1  -1 -18   11.99    2.70 
   1  -1 -18    8.68    2.02 
  -1  -1  18    8.16    1.30 
  -1  -1  17   36.61    2.61 
   1  -1 -17   29.44    3.01 
   1  -1 -17   33.76    3.54 
   1  -1 -17   29.17    2.85 
   1  -1 -16  141.50    7.91 
   1  -1 -16  149.39    7.77 
  -1  -1  16  139.66    6.73 
   1  -1 -16  149.34    7.19 
  -1  -1  16  131.87    6.25 
   1  -1 -15    3.88    2.83 
   1  -1 -15    9.72    4.52 
  -1  -1  15    3.32    2.35 
   1  -1 -15    6.89    4.19 
  -1  -1  15    3.48    1.71 
  -1  -1  15    4.65    1.73 
   1  -1 -14  206.94    9.87 
   1  -1 -14  206.26   10.50 
  -1  -1  14  208.28    9.27 
   1  -1 -14  215.92   10.71 
  -1  -1  14  212.22    9.69 
  -1  -1  14  202.42    9.20 
  -1  -1  14  207.74    9.17 
  -1  -1  13  186.98    8.75 
   1  -1 -13  202.11    9.27 
  -1  -1  13  204.65    8.87 
   1  -1 -13  195.98    9.57 
  -1  -1  13  193.12    9.13 
   1  -1 -13  193.09    9.75 
  -1  -1  13  183.50    8.62 
   1  -1 -13  195.29    9.80 
  -1  -1  12    3.39    1.95 
  -1  -1  12    3.75    2.16 
  -1  -1  12    3.24    1.93 
   1  -1 -12    0.63    3.35 
  -1  -1  12    4.77    2.83 
   1  -1 -12    5.67    3.35 
  -1  -1  12    3.64    2.80 
   1  -1 -12    6.05    3.01 
   1  -1 -12    6.72    2.53 
  -1  -1  12    1.53    1.78 
   1  -1 -12    4.47    2.65 
   1  -1 -11  399.49   16.94 
  -1  -1  11  408.33   16.76 
   1  -1 -11  396.95   16.77 
  -1  -1  11  416.04   17.16 
   1  -1 -11  410.49   17.20 
  -1  -1  11  413.77   17.20 
  -1  -1  11  393.18   16.67 
   1  -1 -11  411.92   16.87 
  -1  -1  11  394.48   16.69 
  -1  -1  11  393.96   16.66 
   1  -1 -10  305.06   12.61 
  -1  -1  10  297.29   12.54 
  -1  -1  10  300.91   12.98 
  -1  -1  10  297.09   12.65 
   1  -1 -10  283.03   12.67 
  -1  -1  10  312.42   12.97 
  -1  -1  10  298.39   12.57 
   1  -1 -10  294.91   12.54 
  -1  -1  10  299.02   12.57 
  -1  -1   9  589.96   25.54 
  -1  -1   9  564.83   25.39 
  -1  -1   9  606.83   24.14 
   1  -1  -9  606.79   23.87 
  -1  -1   9  583.91   23.87 
  -1  -1   9  579.41   23.88 
   1  -1  -9  565.46   27.13 
  -1  -1   9  580.36   23.90 
  -1  -1   9  573.17   23.93 
  -1  -1   9  608.04   24.24 
   1  -1  -9  611.98   23.96 
  -1  -1   9  593.09   23.90 
  -1  -1   9  623.20   23.90 
  -1  -1   9  594.42   24.15 
   1  -1  -9  594.71   23.84 
  -1  -1   8  113.08    5.42 
   1  -1  -8  120.61    5.22 
   1  -1  -8  115.61    7.15 
   1  -1  -8  116.54    7.89 
  -1  -1   8  112.59    5.34 
  -1  -1   8  113.56    5.50 
  -1  -1   8  116.72    5.68 
  -1  -1   8  127.17    6.66 
   1  -1  -8  118.44    5.24 
  -1  -1   8  129.54    6.73 
  -1  -1   8  109.49    5.60 
  -1  -1   7  188.22    9.02 
  -1  -1   7  180.06    8.08 
  -1  -1   7  198.03    8.88 
  -1  -1   7  189.76    9.06 
   1  -1  -7  195.19   10.25 
  -1  -1   7  179.27    8.05 
  -1  -1   7  182.49    8.05 
  -1  -1   6  430.64   17.33 
  -1  -1   6  384.62   17.17 
  -1  -1   6  416.78   17.09 
   1  -1  -6  365.75   17.89 
  -1  -1   5   72.73    4.13 
  -1  -1   5   73.04    4.21 
  -1  -1   5   72.53    4.25 
   1  -1  -5   63.84    4.85 
   1  -1  -5   65.14    3.73 
  -1  -1   4  249.48   10.43 
   1  -1  -4  233.97    9.99 
   1  -1  -4  232.05   11.00 
  -1  -1   3 3518.74  143.64 
   1  -1  -3 3667.46  143.41 
   1  -1  -3 3752.41  143.11 
   1  -1  -2 3240.03  123.12 
   1  -1  -2 3227.50  122.76 
   1  -1  -2 3167.01  122.47 
  -1  -1   2 3093.70  123.19 
  -1  -1   2 2926.08  123.06 
   1  -1  -1 8996.92  364.83 
   1  -1  -1 9999.00  365.34 
  -1  -1   1 9707.46  365.32 
   1  -1  -1 9496.48  364.85 
   1  -1   0 1065.46   40.56 
  -1  -1   0 1054.28   41.23 
   1  -1   0 1025.19   40.97 
   1  -1   0  991.99   40.83 
   1  -1   0 1040.14   40.53 
  -1  -1   0 1020.60   40.99 
   1  -1   1 3993.83  157.43 
   1  -1   1 4155.37  157.27 
  -1  -1  -1 4105.73  157.61 
  -1  -1  -1 3986.82  157.68 
  -1  -1  -1 3736.73  157.33 
  -1  -1  -1 4195.17  157.50 
  -1  -1  -1 4029.42  157.16 
   1  -1   1 4074.83  157.00 
  -1  -1  -2 1338.63   60.83 
   1  -1   2 1595.29   60.28 
   1  -1   2 1627.63   60.53 
  -1  -1  -2 1485.85   60.81 
  -1  -1  -2 1569.00   60.63 
  -1  -1  -2 1532.17   60.44 
   1  -1   2 1431.49   60.86 
  -1  -1  -2 1615.64   60.54 
  -1  -1  -3 1097.78   46.12 
   1  -1   3 1154.22   45.57 
  -1  -1  -3 1227.08   46.20 
  -1  -1  -3 1128.12   46.11 
   1  -1   3 1178.75   45.77 
   1  -1   4  537.04   21.71 
   1  -1   4  538.58   22.10 
  -1  -1  -4  573.03   22.65 
  -1  -1  -4  530.98   22.56 
   1  -1   5 1787.47   69.90 
   1  -1   5 1723.96   70.27 
   1  -1   5 1850.22   70.17 
  -1  -1  -5 1723.74   70.85 
  -1  -1  -6 2639.15  101.74 
   1  -1   6 2787.78  100.88 
   1  -1   6 2634.43  100.50 
  -1  -1  -6 2379.87  101.58 
   1  -1   6 2641.17  100.95 
  -1  -1  -7   52.75    3.04 
  -1  -1  -7   52.23    2.87 
   1  -1   7   51.68    3.31 
   1  -1   7   53.05    3.15 
  -1  -1  -7   61.40    4.91 
  -1  -1  -7   55.19    3.08 
   1  -1   7   48.41    3.17 
  -1  -1  -7   47.75    4.41 
   1  -1   7   53.74    3.64 
   1  -1   7   52.69    3.06 
  -1  -1  -7   45.64    4.36 
  -1  -1  -8  129.27    5.72 
  -1  -1  -8  126.36    7.96 
  -1  -1  -8  128.23    5.90 
   1  -1   8  123.73    5.81 
   1  -1   8  116.06    5.85 
  -1  -1  -8  102.78    7.52 
   1  -1   8  125.23    5.98 
   1  -1   8  126.10    5.86 
   1  -1   8  117.78    5.98 
   1  -1   8  129.34    5.93 
  -1  -1  -8  122.40    7.72 
  -1  -1  -8  121.50    5.73 
   1  -1   8  121.62    6.33 
   1  -1   8  128.92    6.80 
   1  -1   9  131.89    6.44 
  -1  -1  -9  131.59    6.62 
  -1  -1  -9  140.93    6.52 
   1  -1   9  140.15    6.50 
   1  -1   9  133.35    6.62 
   1  -1   9  141.31    6.69 
   1  -1   9  138.68    6.60 
  -1  -1  -9  137.45    6.37 
   1  -1  10   27.85    2.94 
   1  -1  10   30.45    3.34 
   1  -1  10   27.28    2.42 
   1  -1  10   30.36    3.09 
  -1  -1 -10   29.30    2.80 
  -1  -1 -10   25.74    2.77 
   1  -1  10   30.11    2.73 
  -1  -1 -10   27.78    3.21 
   1  -1  10   39.08    3.27 
   1  -1  11    9.66    2.68 
   1  -1  11    7.90    2.55 
  -1  -1 -11    8.38    3.29 
  -1  -1 -11   11.00    2.61 
   1  -1  11    6.75    2.95 
   1  -1  11   10.15    2.28 
   1  -1  11    2.13    2.25 
   1  -1  11    8.86    1.90 
  -1  -1 -11    5.59    3.54 
  -1  -1 -12  436.97   17.83 
  -1  -1 -12  423.60   17.27 
  -1  -1 -12  402.03   17.83 
   1  -1  12  412.57   17.11 
   1  -1  12  400.12   17.09 
  -1  -1 -12  393.94   17.70 
   1  -1  12  398.47   16.67 
   1  -1  12  401.78   16.91 
   1  -1  12  378.21   17.04 
  -1  -1 -13   84.49    6.06 
   1  -1  13   85.75    4.47 
   1  -1  13   84.61    5.10 
   1  -1  13   91.08    5.18 
  -1  -1 -13   87.55    5.45 
  -1  -1 -13  102.98    6.72 
  -1  -1 -13  105.85    6.68 
   1  -1  13   88.78    4.93 
   1  -1  14   36.31    3.32 
  -1  -1 -14   43.05    4.67 
  -1  -1 -14   42.80    5.29 
   1  -1  14   45.24    3.32 
  -1  -1 -14   43.46    3.83 
   1  -1  14   39.22    3.28 
  -1  -1 -14   40.40    5.39 
   1  -1  15    6.93    2.13 
  -1  -1 -15    9.46    3.65 
   1  -1  15    7.02    2.11 
  -1  -1 -15    9.88    3.08 
  -1  -1 -15    9.85    2.86 
   1  -1  15    8.92    1.88 
  -1  -1 -16   36.65    3.24 
  -1  -1 -16   39.16    3.96 
   1  -1  16   38.60    2.47 
   1  -1  16   34.06    2.66 
  -1  -1 -16   34.76    4.55 
   1  -1  16   41.25    2.84 
   1  -1  17    6.78    1.23 
  -1  -1 -17    5.46    2.37 
  -1  -1 -18   17.82    2.29 
   1   0 -19    2.43    1.50 
   1   0 -18   59.38    3.90 
   1   0 -18   58.02    3.89 
  -1   0  18   66.58    3.29 
   1   0 -18   63.62    4.30 
   1   0 -17   14.28    3.16 
   1   0 -17   10.60    2.29 
   1   0 -17   10.52    3.56 
  -1   0  17   13.80    2.18 
  -1   0  16    4.98    1.65 
   1   0 -16    7.31    3.52 
   1   0 -16    7.59    3.52 
   1   0 -16    7.74    3.72 
  -1   0  16    3.87    2.18 
   1   0 -16    5.13    2.75 
   1   0 -15   10.10    4.10 
   1   0 -15   12.95    3.78 
  -1   0  15   10.77    2.73 
   1   0 -15    9.28    3.06 
  -1   0  15   11.55    1.79 
  -1   0  15    9.18    2.02 
   1   0 -15   10.81    3.63 
  -1   0  14  165.17    7.61 
   1   0 -14  181.54    8.75 
  -1   0  14  160.41    8.03 
   1   0 -14  170.82    8.57 
   1   0 -14  171.00    8.95 
  -1   0  14  173.99    7.81 
  -1   0  14  159.32    7.59 
   1   0 -14  168.86    8.79 
  -1   0  13    6.46    2.62 
  -1   0  13    4.01    1.86 
  -1   0  13    5.17    1.96 
   1   0 -13   10.62    3.10 
  -1   0  13    7.37    2.33 
   1   0 -13    9.26    3.42 
   1   0 -13    5.15    3.18 
   1   0 -13    5.75    3.24 
  -1   0  12  387.87   16.72 
   1   0 -12  414.40   17.37 
   1   0 -12  392.75   17.30 
   1   0 -12  408.62   17.17 
  -1   0  12  404.26   17.04 
  -1   0  12  398.38   16.72 
  -1   0  12  419.47   16.91 
   1   0 -12  407.73   17.22 
  -1   0  11    7.33    1.78 
  -1   0  11    7.98    2.22 
   1   0 -11    6.80    2.69 
  -1   0  11    4.58    2.32 
   1   0 -11    5.20    2.49 
  -1   0  11    6.95    2.32 
  -1   0  11    5.90    1.85 
   1   0 -11    5.14    2.35 
   1   0 -10  323.56   13.32 
   1   0 -10  318.39   13.56 
  -1   0  10  324.77   14.70 
  -1   0  10  313.97   13.59 
  -1   0  10  328.23   13.41 
  -1   0  10  326.71   13.37 
  -1   0  10  313.68   13.62 
   1   0 -10  315.53   13.53 
  -1   0  10  326.25   13.47 
  -1   0   9  169.23    7.63 
  -1   0   9  171.83    7.47 
   1   0  -9  167.11    7.33 
  -1   0   9  175.80    7.43 
  -1   0   9  163.95    8.81 
   1   0  -9  172.71   10.71 
  -1   0   9  170.22    7.69 
   1   0  -9  167.51    7.54 
  -1   0   9  162.19    8.44 
  -1   0   9  169.18    7.67 
   1   0  -9  173.99   12.64 
  -1   0   9  171.43    7.53 
   1   0  -9  163.79    7.51 
  -1   0   9  178.46    7.44 
   1   0  -8   96.78    6.23 
  -1   0   8  117.57    6.38 
  -1   0   8  114.25    6.15 
  -1   0   8  110.46    5.05 
  -1   0   8  107.07    5.25 
   1   0  -8  118.90    7.87 
   1   0  -8  108.94    5.12 
   1   0  -8  126.27    9.76 
  -1   0   8  110.06    5.16 
   1   0  -8  112.98    5.14 
  -1   0   8  117.63    6.01 
  -1   0   8  113.35    5.33 
  -1   0   8  117.69    5.10 
   1   0  -7  867.87   38.53 
  -1   0   7  981.43   38.13 
   1   0  -7  961.99   38.46 
  -1   0   7  890.19   38.25 
  -1   0   7 1002.50   38.29 
   1   0  -6    2.18    1.99 
  -1   0   6    3.72    1.60 
   1   0  -6    0.24    1.77 
  -1   0   6    1.08    1.30 
   1   0  -6    4.27    2.56 
   1   0  -5  535.83   21.94 
  -1   0   5  531.22   21.06 
  -1   0   5  530.11   21.22 
   1   0  -5  475.02   21.19 
  -1   0   4 1031.74   40.00 
  -1   0   4 1047.68   40.13 
   1   0  -4  939.66   40.05 
  -1   0   4 1000.61   40.30 
   1   0  -4 1037.38   40.59 
  -1   0   3 2250.30   84.12 
  -1   0   3 2185.57   84.36 
   1   0  -3 2102.44   84.20 
   1   0  -3 2200.75   84.53 
  -1   0   3 2035.38   84.13 
   1   0  -2 5834.17  220.34 
   1   0  -2 5548.44  220.04 
  -1   0   2 5657.89  220.04 
  -1   0   1   95.01    3.82 
   1   0  -1   78.67    3.73 
  -1   0   0 1509.55   58.95 
  -1   0  -1 1092.71   40.30 
  -1   0  -1 1123.65   40.32 
   1   0   1 1035.13   40.25 
   1   0   2 6386.28  240.88 
  -1   0  -2 6198.56  240.96 
   1   0   2 6022.34  240.87 
  -1   0  -2 6156.65  240.96 
  -1   0  -3   88.34    4.40 
   1   0   3   87.14    4.14 
   1   0   3   88.66    4.12 
  -1   0  -4  341.54   14.56 
   1   0   4  344.19   14.16 
   1   0   4  351.52   14.25 
  -1   0  -4  354.51   14.50 
  -1   0  -4  316.72   14.22 
   1   0   5 1671.19   64.77 
  -1   0  -5 1701.31   65.22 
  -1   0  -5 1673.16   65.30 
  -1   0  -5 1473.31   64.85 
   1   0   5 1697.67   64.83 
  -1   0  -6  767.50   31.34 
  -1   0  -6  775.72   31.07 
  -1   0  -6  697.80   31.15 
   1   0   6  789.00   30.74 
   1   0   6  741.25   30.72 
   1   0   7 6118.54  239.58 
   1   0   7 6202.81  239.51 
   1   0   7 6196.65  240.52 
  -1   0  -7 6178.69  239.50 
  -1   0  -7 6163.99  239.43 
   1   0   7 6158.10  240.34 
  -1   0  -7 6193.13  239.48 
   1   0   7 6149.07  239.47 
  -1   0  -7 6424.76  241.06 
  -1   0  -7 5617.15  241.07 
  -1   0  -7 5417.64  240.88 
   1   0   7 6105.01  239.46 
   1   0   7 6122.86  239.53 
  -1   0  -7 6203.33  239.43 
   1   0   7 6418.33  240.47 
  -1   0  -7 6261.36  239.46 
  -1   0  -8 1561.28   60.08 
   1   0   8 1530.74   60.04 
  -1   0  -8 1505.68   59.99 
   1   0   8 1534.48   59.99 
   1   0   8 1526.72   59.77 
   1   0   8 1548.26   60.00 
  -1   0  -8 1561.37   60.09 
  -1   0  -8 1508.75   62.19 
  -1   0  -8 1426.77   61.90 
   1   0   8 1519.79   61.04 
  -1   0  -8 1539.61   60.04 
   1   0   8 1527.85   59.85 
  -1   0  -8 1487.88   62.18 
   1   0   8 1480.68   59.89 
  -1   0  -8 1514.58   59.99 
   1   0   9   49.29    3.22 
   1   0   9   58.08    3.06 
  -1   0  -9   43.61    4.70 
  -1   0  -9   61.80    3.63 
  -1   0  -9   61.81    7.71 
  -1   0  -9   57.64    3.57 
   1   0   9   58.01    3.39 
  -1   0  -9   60.92    3.61 
   1   0   9   54.42    3.49 
   1   0   9   55.19    3.15 
  -1   0  -9   55.57    3.64 
  -1   0  -9   53.04    3.60 
   1   0   9   55.56    3.31 
   1   0  10  124.33    6.06 
  -1   0 -10  123.76    6.41 
   1   0  10  122.67    5.70 
  -1   0 -10  125.09    6.37 
  -1   0 -10  127.01    6.45 
   1   0  10  123.18    6.12 
   1   0  10  135.48    6.14 
   1   0  10  114.11    5.91 
  -1   0 -10  122.71    6.26 
   1   0  10  119.78    5.72 
  -1   0 -10  121.43    6.22 
   1   0  11  367.64   15.03 
  -1   0 -11  367.03   15.68 
  -1   0 -11  363.92   15.82 
   1   0  11  357.81   15.30 
   1   0  11  359.75   15.38 
  -1   0 -11  371.22   15.86 
   1   0  11  361.82   15.25 
   1   0  11  360.94   15.00 
   1   0  12    2.21    1.58 
  -1   0 -12    4.06    3.52 
   1   0  12    3.35    2.19 
  -1   0 -12    0.56    3.25 
   1   0  12    0.58    2.42 
   1   0  12   -0.46    2.28 
  -1   0 -12    0.39    3.30 
  -1   0 -12    1.36    2.67 
   1   0  12    1.98    1.51 
   1   0  13   15.69    1.77 
   1   0  13   11.40    2.56 
  -1   0 -13   16.58    4.26 
  -1   0 -13   15.37    3.23 
   1   0  13   11.42    2.41 
   1   0  13   14.40    2.54 
  -1   0 -13   19.62    3.86 
  -1   0 -13   20.35    3.98 
   1   0  14    2.05    2.21 
   1   0  14    1.20    2.35 
   1   0  14    0.28    2.03 
  -1   0 -14   -3.72    4.15 
  -1   0 -14    1.17    3.48 
  -1   0 -14    1.89    2.83 
  -1   0 -14    3.53    3.61 
  -1   0 -15   86.99    5.40 
   1   0  15   85.67    4.78 
   1   0  15   87.04    4.69 
   1   0  15   89.97    4.87 
  -1   0 -15   89.54    6.42 
  -1   0 -15   89.11    5.90 
   1   0  16   78.07    4.20 
  -1   0 -16   75.71    5.38 
  -1   0 -16   75.40    4.67 
  -1   0 -16   81.94    5.41 
   1   0  16   83.60    4.16 
  -1   0 -16   77.92    5.73 
  -1   0 -17    3.06    2.71 
  -1   0 -17   -0.90    2.94 
  -1   0 -17    4.62    2.50 
   1   0  17    3.14    1.25 
  -1   0 -18   65.65    3.79 
  -1   0 -18   81.83    4.29 
   1   1 -18    9.97    2.08 
  -1   1  18    8.91    1.42 
  -1   1  18    9.41    1.19 
   1   1 -18    9.46    2.56 
  -1   1  17   32.31    2.74 
   1   1 -17   39.55    3.75 
   1   1 -17   42.27    3.97 
   1   1 -16  134.93    7.19 
  -1   1  16  152.31    6.94 
   1   1 -16  147.42    7.74 
   1   1 -16  150.53    7.99 
  -1   1  16  137.45    6.30 
   1   1 -15    7.28    3.53 
   1   1 -15    3.61    2.93 
  -1   1  15    3.38    1.57 
  -1   1  15    3.63    2.55 
   1   1 -15    2.79    3.94 
  -1   1  15    5.40    1.96 
   1   1 -14  228.95   10.79 
   1   1 -14  206.17   10.34 
  -1   1  14  212.51    9.74 
   1   1 -14  217.64   10.51 
  -1   1  14  215.00    9.49 
  -1   1  14  222.73   10.00 
   1   1 -14  214.74   10.75 
   1   1 -13  188.07    8.97 
   1   1 -13  187.88    9.41 
   1   1 -13  196.27    9.63 
  -1   1  13  206.69    9.10 
  -1   1  13  214.48    9.35 
  -1   1  13  196.49    8.86 
   1   1 -13  188.18    9.81 
   1   1 -13  207.03    9.98 
  -1   1  12    4.88    3.15 
   1   1 -12    3.00    3.28 
   1   1 -12    4.35    3.06 
   1   1 -12    6.34    2.72 
  -1   1  12    1.58    2.15 
   1   1 -12    6.45    2.22 
  -1   1  12    2.32    2.48 
  -1   1  12    6.66    2.10 
   1   1 -12    2.16    2.82 
   1   1 -11  385.65   17.18 
   1   1 -11  383.90   17.13 
   1   1 -11  400.07   17.07 
   1   1 -11  392.53   17.26 
  -1   1  11  419.60   16.89 
  -1   1  11  409.97   17.16 
  -1   1  11  427.47   17.47 
  -1   1  11  430.81   17.07 
   1   1 -11  414.63   16.98 
  -1   1  11  429.07   16.99 
   1   1 -11  390.92   17.29 
   1   1 -10  301.16   12.83 
  -1   1  10  289.04   13.12 
   1   1 -10  302.45   12.94 
  -1   1  10  319.33   12.81 
   1   1 -10  281.31   12.94 
   1   1 -10  303.54   12.89 
  -1   1  10  320.72   12.75 
   1   1 -10  303.27   13.04 
  -1   1  10  302.51   12.86 
   1   1 -10  299.37   12.76 
  -1   1  10  307.22   12.95 
  -1   1   9  618.04   23.90 
  -1   1   9  593.41   23.58 
  -1   1   9  593.73   23.67 
   1   1  -9  583.25   23.64 
  -1   1   9  586.88   23.47 
   1   1  -9  535.44   23.59 
  -1   1   9  592.18   23.59 
   1   1  -9  580.69   23.54 
  -1   1   8  109.56    5.25 
   1   1  -8   95.87    6.45 
  -1   1   8  111.59    5.15 
  -1   1   8  106.30    5.36 
   1   1  -8  114.95    5.22 
  -1   1   8  116.71    5.26 
  -1   1   8  123.38    5.69 
   1   1  -8  114.95    5.26 
   1   1  -8  125.72    9.26 
   1   1  -8  109.35    5.28 
  -1   1   8  122.67    6.52 
  -1   1   8  112.93    5.54 
   1   1  -7  169.01    9.00 
   1   1  -7  183.00    7.78 
   1   1  -7  180.82    7.81 
   1   1  -7  182.63    7.79 
  -1   1   7  193.79    8.23 
   1   1  -7  203.98   11.26 
  -1   1   7  180.88    7.86 
  -1   1   7  198.78    9.00 
   1   1  -7  184.89    9.43 
   1   1  -6  400.63   18.28 
  -1   1   6  402.24   16.50 
  -1   1   6  382.63   16.45 
   1   1  -6  366.67   16.55 
   1   1  -6  357.18   16.56 
  -1   1   6  397.55   15.80 
   1   1  -5   62.47    3.95 
  -1   1   5   69.99    3.31 
  -1   1   5   69.98    3.99 
  -1   1   5   71.80    3.94 
   1   1  -5   66.42    4.11 
   1   1  -5   61.12    5.48 
   1   1  -4  240.59   11.40 
  -1   1   4  265.12   10.40 
  -1   1   4  248.85   10.46 
   1   1  -4  228.13   10.47 
  -1   1   4  248.46    9.74 
   1   1  -3 3773.04  143.37 
  -1   1   3 3588.33  142.87 
  -1   1   3 3797.19  143.54 
  -1   1   3 3707.98  143.44 
   1   1  -3 3815.88  143.62 
  -1   1   2 3508.75  132.93 
  -1   1   2 3430.99  133.05 
   1   1  -2 3354.36  133.28 
   1   1  -2 3302.98  133.13 
  -1   1   1 9183.73  357.62 
  -1   1   1 9088.51  357.76 
   1   1  -1 9454.94  358.06 
   1   1   0 1002.58   37.93 
   1   1   0  873.40   38.12 
  -1   1   0  890.25   37.86 
   1   1   0 1079.58   38.02 
  -1   1  -1 3977.70  155.96 
   1   1   1 4232.56  156.01 
   1   1   1 4124.40  156.12 
   1   1   1 3897.83  156.00 
  -1   1  -1 3685.51  155.88 
   1   1   1 4147.22  155.91 
  -1   1  -2 1415.56   59.77 
   1   1   2 1620.79   60.21 
   1   1   2 1523.21   60.30 
  -1   1  -2 1616.07   60.37 
  -1   1  -2 1609.31   59.94 
  -1   1  -3 1156.61   45.61 
   1   1   3 1189.74   45.94 
  -1   1  -3 1213.57   46.20 
  -1   1  -3 1106.58   45.71 
  -1   1  -4  501.26   21.59 
   1   1   4  520.95   21.26 
  -1   1  -4  516.04   21.04 
  -1   1  -4  500.00   21.90 
   1   1   4  529.32   20.99 
  -1   1  -4  539.77   21.24 
   1   1   4  506.63   21.25 
   1   1   5 1758.96   67.83 
  -1   1  -5 1631.49   67.67 
  -1   1  -5 1675.52   68.32 
   1   1   5 1666.08   67.84 
  -1   1  -5 1699.30   68.86 
  -1   1  -5 1760.26   67.95 
   1   1   5 1781.64   67.56 
   1   1   6 2722.51  104.77 
   1   1   6 2612.61  104.39 
  -1   1  -6 2620.36  105.41 
  -1   1  -6 2922.07  106.55 
  -1   1  -6 2587.21  104.96 
  -1   1  -6 2645.01  104.77 
   1   1   6 2631.07  104.62 
   1   1   7   57.11    3.03 
  -1   1  -7   55.56    2.96 
  -1   1  -7   55.58    3.16 
   1   1   7   53.99    2.94 
   1   1   7   55.84    3.58 
   1   1   7   53.13    3.76 
   1   1   7   52.18    3.19 
   1   1   7   53.39    3.02 
  -1   1  -7   50.43    4.50 
   1   1   7   58.55    2.91 
  -1   1  -7   49.54    3.90 
  -1   1  -7   45.58    3.90 
  -1   1  -7   57.51    3.17 
   1   1   7   56.56    3.89 
  -1   1  -7   51.92    5.78 
  -1   1  -7   55.40    3.03 
  -1   1  -8  126.93    7.86 
  -1   1  -8  123.68    7.36 
   1   1   8  128.25    5.54 
   1   1   8  121.71    5.71 
  -1   1  -8  118.91    5.53 
  -1   1  -8  125.82    5.67 
   1   1   8  120.63    6.76 
  -1   1  -8  112.00    5.72 
   1   1   8  124.40    5.81 
  -1   1  -8  123.60    5.79 
  -1   1  -8  125.09    5.87 
   1   1   8  120.05    6.58 
   1   1   8  116.44    6.67 
  -1   1  -8  106.39    6.92 
   1   1   8  121.51    5.67 
   1   1   8  125.35    5.58 
  -1   1  -8  144.31    9.58 
  -1   1  -9  135.69    6.54 
   1   1   9  145.45    6.43 
   1   1   9  137.66    6.48 
  -1   1  -9  137.33    6.37 
  -1   1  -9  133.85    6.69 
   1   1   9  139.27    6.21 
  -1   1  -9  138.49    6.59 
   1   1   9  131.96    6.17 
   1   1   9  135.51    6.40 
   1   1  10   27.68    2.68 
   1   1  10   27.74    2.83 
   1   1  10   28.63    2.39 
   1   1  10   34.11    2.77 
  -1   1 -10   30.43    3.05 
  -1   1 -10   27.38    3.21 
  -1   1 -10   28.07    3.16 
   1   1  10   26.92    2.25 
  -1   1 -10   31.42    2.68 
   1   1  11    2.22    2.26 
  -1   1 -11    6.06    2.94 
   1   1  11    6.91    2.25 
  -1   1 -11   11.77    3.03 
  -1   1 -11    7.65    2.24 
   1   1  11    5.23    2.20 
   1   1  11    5.28    1.60 
   1   1  11    9.15    1.88 
   1   1  12  429.41   17.03 
   1   1  12  404.71   16.86 
  -1   1 -12  415.24   17.77 
   1   1  12  414.36   17.28 
  -1   1 -12  389.38   17.81 
   1   1  12  430.31   17.24 
   1   1  12  428.94   17.37 
  -1   1 -12  375.23   17.84 
  -1   1 -12  390.91   17.24 
  -1   1 -13   93.17    6.39 
  -1   1 -13   93.99    6.17 
   1   1  13   87.29    5.09 
   1   1  13   97.58    5.12 
   1   1  13   92.99    4.56 
   1   1  14   40.95    3.30 
   1   1  14   45.99    3.43 
  -1   1 -14   41.11    4.62 
  -1   1 -14   37.66    4.25 
  -1   1 -14   46.72    5.10 
  -1   1 -15    6.88    3.62 
   1   1  15    6.68    2.11 
  -1   1 -15    8.87    3.28 
  -1   1 -15    4.92    3.75 
   1   1  15    8.23    2.11 
   1   1  16   41.33    2.71 
  -1   1 -16   41.12    4.09 
   1   1  16   35.16    2.27 
  -1   1 -16   35.30    4.33 
  -1   1 -16   40.22    3.56 
  -1   1 -16   36.14    3.34 
   1   1  16   37.36    2.67 
  -1   1 -17    8.20    2.58 
   1   1  17    8.04    1.30 
  -1   1 -17    7.53    2.78 
   1   2 -18   23.14    2.38 
   1   2 -18   14.62    1.80 
   1   2 -17   20.47    3.15 
  -1   2  17   18.37    1.63 
  -1   2  16   43.61    3.12 
  -1   2  16   35.48    2.28 
   1   2 -16   34.00    3.25 
   1   2 -16   40.67    4.24 
  -1   2  16   39.42    2.64 
   1   2 -15    5.86    2.30 
   1   2 -15    7.63    2.88 
   1   2 -15   14.25    4.16 
  -1   2  15    7.13    1.57 
  -1   2  15    6.87    1.89 
  -1   2  15    9.42    2.51 
  -1   2  14  192.85    8.75 
   1   2 -14  183.74    8.79 
   1   2 -14  184.51    9.75 
   1   2 -14  181.09    9.01 
  -1   2  14  181.63    8.27 
  -1   2  13   26.87    2.57 
  -1   2  13   24.13    3.24 
  -1   2  13   26.76    2.47 
   1   2 -13   22.50    3.34 
   1   2 -13   26.15    4.33 
   1   2 -13   27.03    3.21 
   1   2 -12  342.70   15.53 
  -1   2  12  389.58   15.47 
  -1   2  12  374.89   15.27 
   1   2 -12  332.93   15.97 
   1   2 -12  362.24   15.59 
   1   2 -12  354.01   15.95 
  -1   2  12  358.69   15.51 
   1   2 -11  240.85   10.66 
   1   2 -11  238.55   10.72 
   1   2 -11  228.90   10.77 
  -1   2  11  237.77   10.44 
   1   2 -11  225.25   10.35 
   1   2 -11  245.01   11.04 
   1   2 -11  227.02   11.02 
  -1   2  11  245.01   11.16 
  -1   2  11  237.10   10.58 
  -1   2  11  251.75   10.74 
  -1   2  10   92.32    5.09 
  -1   2  10   97.50    5.48 
   1   2 -10   87.53    4.69 
   1   2 -10   91.69    5.39 
  -1   2  10   95.22    4.85 
   1   2 -10   88.60    5.15 
   1   2 -10   89.77    5.20 
   1   2 -10   89.70    5.27 
  -1   2  10   97.22    5.08 
   1   2 -10   90.00    4.86 
   1   2 -10   85.91    5.01 
   1   2  -9  576.41   23.89 
  -1   2   9  596.61   24.19 
  -1   2   9  627.26   24.00 
   1   2  -9  600.17   23.99 
   1   2  -9  602.08   24.03 
  -1   2   9  578.97   23.86 
   1   2  -9  569.87   23.74 
   1   2  -9  593.11   24.06 
   1   2  -9  583.67   23.78 
   1   2  -9  575.03   23.97 
  -1   2   8    6.01    1.79 
   1   2  -8    4.40    1.87 
   1   2  -8    3.32    1.33 
   1   2  -8    3.61    1.55 
  -1   2   8    4.14    1.98 
  -1   2   8    3.83    1.16 
   1   2  -8    5.77    1.88 
   1   2  -8    5.16    1.49 
  -1   2   8    5.80    1.85 
  -1   2   8    4.98    1.82 
  -1   2   7   36.34    2.76 
   1   2  -7   37.97    2.30 
   1   2  -7   36.75    2.43 
   1   2  -7   35.21    2.41 
  -1   2   7   39.07    2.62 
  -1   2   7   33.66    2.52 
  -1   2   7   36.96    2.12 
  -1   2   7   38.84    3.16 
  -1   2   7   38.07    3.29 
   1   2  -7   31.46    3.33 
   1   2  -7   32.71    2.49 
   1   2  -7   35.18    2.17 
   1   2  -7   34.07    3.17 
   1   2  -6   32.59    3.33 
  -1   2   6   47.38    2.78 
   1   2  -6   46.31    2.61 
   1   2  -6   45.51    3.31 
   1   2  -6   43.64    2.53 
  -1   2   6   49.05    2.93 
  -1   2   6   44.45    3.05 
  -1   2   6   47.31    3.30 
  -1   2   6   46.24    3.46 
   1   2  -6   45.74    2.62 
  -1   2   5  200.48    9.29 
   1   2  -5  209.58    9.22 
  -1   2   5  198.11    9.08 
   1   2  -5  181.54    9.30 
  -1   2   5  203.40    8.66 
   1   2  -5  207.57   10.47 
  -1   2   4  661.04   26.77 
   1   2  -4  629.59   26.82 
  -1   2   4  678.61   26.60 
   1   2  -4  648.17   27.73 
  -1   2   3  395.82   16.53 
   1   2  -3  401.00   16.61 
  -1   2   3  415.60   16.31 
   1   2  -3  396.38   16.06 
   1   2  -3  415.30   16.52 
   1   2  -3  369.32   16.25 
   1   2  -3  410.65   17.64 
  -1   2   2 1165.59   44.53 
   1   2  -2 1152.97   44.60 
   1   2  -2 1196.26   45.57 
  -1   2   2 1205.14   44.27 
   1   2  -2 1172.06   44.36 
  -1   2   1  975.84   38.24 
  -1   2   1  950.68   37.90 
   1   2  -1 1015.46   38.37 
  -1   2   1  972.92   39.05 
   1   2   0  601.71   23.44 
   1   2   0  598.61   23.65 
   1   2   0  589.73   23.60 
  -1   2   0  602.23   24.08 
   1   2   0  547.59   23.26 
  -1   2  -1  794.23   32.60 
   1   2   1  772.28   32.03 
   1   2   1  834.88   32.01 
  -1   2  -2  964.13   40.97 
   1   2   2 1014.85   40.28 
   1   2   2 1060.15   40.61 
  -1   2  -3 1025.95   40.71 
  -1   2  -3  980.91   41.05 
   1   2   3 1033.09   40.17 
  -1   2  -3  984.30   39.90 
   1   2   3 1038.27   39.94 
  -1   2  -4  793.82   30.29 
   1   2   4  769.31   29.10 
   1   2   4  776.44   29.77 
  -1   2  -4  763.18   30.49 
   1   2   4  732.02   29.23 
  -1   2  -5   22.68    2.86 
  -1   2  -5   24.41    2.16 
   1   2   5   22.08    1.76 
  -1   2  -5   20.52    1.69 
   1   2   5   17.31    1.84 
  -1   2  -5   24.93    1.80 
  -1   2  -5   21.41    2.86 
   1   2   5   22.93    2.05 
   1   2   5   21.83    1.87 
   1   2   5   24.05    2.33 
  -1   2  -5   21.87    1.71 
   1   2   6  956.68   38.73 
   1   2   6  971.80   38.01 
  -1   2  -6  952.08   39.54 
  -1   2  -6 1007.70   37.68 
  -1   2  -6  938.01   39.69 
  -1   2  -6  989.02   37.65 
   1   2   6  921.05   37.69 
  -1   2  -6  824.73   37.74 
   1   2   6  970.97   37.63 
  -1   2  -6  982.16   37.69 
   1   2   6  994.15   37.74 
   1   2   6  929.53   37.79 
  -1   2  -6  894.75   38.49 
   1   2   6  893.14   37.98 
  -1   2  -6  970.53   37.61 
   1   2   7  107.85    5.97 
  -1   2  -7   99.68    4.60 
  -1   2  -7  104.27    5.01 
   1   2   7  104.61    4.87 
   1   2   7  101.88    5.03 
  -1   2  -7   97.03    4.82 
   1   2   7  100.05    5.06 
  -1   2  -7  101.87    5.03 
  -1   2  -7  100.49    6.79 
  -1   2  -7  102.96    4.97 
   1   2   7   93.71    5.06 
  -1   2  -7   89.65    5.78 
  -1   2  -8  383.46   15.82 
   1   2   8  360.65   15.98 
  -1   2  -8  395.85   16.00 
   1   2   8  377.59   16.04 
   1   2   8  373.51   15.77 
  -1   2  -8  376.55   15.84 
  -1   2  -8  382.08   16.02 
   1   2   8  397.61   15.95 
   1   2   8  403.84   15.77 
  -1   2  -8  382.14   16.05 
   1   2   9   55.51    3.24 
   1   2   9   52.27    3.71 
   1   2   9   54.54    3.22 
   1   2   9   54.37    3.68 
  -1   2  -9   48.66    3.48 
  -1   2  -9   58.45    3.95 
  -1   2  -9   55.28    3.50 
  -1   2  -9   53.00    3.95 
  -1   2  -9   53.03    3.77 
   1   2  10   45.41    3.54 
   1   2  10   47.76    3.02 
   1   2  10   49.19    3.08 
   1   2  10   47.39    3.59 
  -1   2 -10   45.88    4.13 
  -1   2 -10   54.12    3.94 
  -1   2 -10   45.41    3.47 
  -1   2 -10   42.66    3.51 
   1   2  11  654.25   25.94 
  -1   2 -11  620.05   26.26 
   1   2  11  644.20   26.33 
  -1   2 -11  666.43   26.84 
  -1   2 -11  611.78   26.41 
  -1   2 -11  623.24   26.44 
   1   2  11  659.57   25.92 
   1   2  11  656.25   26.22 
  -1   2 -12   26.73    3.36 
  -1   2 -12   20.11    3.36 
  -1   2 -12   25.47    4.27 
   1   2  12   27.29    2.22 
   1   2  12   31.44    3.04 
   1   2  12   28.30    2.91 
   1   2  13  117.99    5.73 
  -1   2 -13  100.43    6.16 
   1   2  13  101.49    5.20 
  -1   2 -13  106.12    6.00 
   1   2  13  108.82    5.69 
   1   2  13  101.25    4.98 
  -1   2 -13  106.98    6.92 
  -1   2 -14   -2.13    3.77 
  -1   2 -14    2.62    2.80 
   1   2  14    4.36    2.13 
   1   2  14    1.74    2.06 
   1   2  14    2.94    1.54 
  -1   2 -14    1.16    2.35 
  -1   2 -15    5.01    2.15 
   1   2  15    4.99    1.81 
   1   2  15    4.98    1.39 
  -1   2 -15    2.35    3.85 
  -1   2 -15    8.67    2.72 
   1   2  16   23.79    2.02 
  -1   2 -16   22.82    3.54 
  -1   2 -16   21.69    3.12 
  -1   2 -17   65.44    4.00 
   1   2  17   71.01    3.32 
   1   3 -17    6.83    1.90 
   1   3 -17   12.73    2.21 
  -1   3  16   38.26    2.29 
   1   3 -16   39.42    3.44 
   1   3 -16   32.20    2.72 
  -1   3  15   99.52    4.69 
  -1   3  15   95.94    4.53 
   1   3 -15  105.07    6.04 
  -1   3  14   62.96    3.51 
  -1   3  14   60.29    3.59 
   1   3 -14   63.11    5.15 
  -1   3  14   62.55    3.72 
   1   3 -14   58.74    4.57 
  -1   3  13  126.34    5.97 
  -1   3  13  127.38    5.96 
   1   3 -13  109.87    6.08 
   1   3 -13  111.64    7.01 
  -1   3  13  125.49    5.98 
   1   3 -13  108.68    6.63 
   1   3 -12  108.52    6.91 
   1   3 -12  101.52    6.50 
  -1   3  12  119.28    5.95 
   1   3 -12  114.21    6.64 
  -1   3  12  120.21    5.84 
   1   3 -12  110.67    6.04 
  -1   3  12  111.30    5.81 
  -1   3  12  126.32    6.37 
   1   3 -11  313.69   13.91 
  -1   3  11  313.63   13.26 
   1   3 -11  313.67   13.87 
   1   3 -11  313.99   14.01 
  -1   3  11  278.39   13.46 
  -1   3  11  310.74   13.78 
  -1   3  11  321.46   13.38 
   1   3 -11  294.42   13.47 
  -1   3  11  330.69   13.46 
   1   3 -10  376.85   16.21 
  -1   3  10  390.93   15.48 
   1   3 -10  367.38   16.32 
  -1   3  10  391.56   16.29 
  -1   3  10  346.94   15.82 
   1   3 -10  374.30   16.03 
   1   3 -10  382.95   16.35 
  -1   3  10  380.36   15.91 
  -1   3   9   41.50    3.27 
   1   3  -9   32.31    3.23 
  -1   3   9   34.76    3.13 
   1   3  -9   39.47    3.23 
   1   3  -9   32.78    3.49 
   1   3  -9   39.29    3.35 
  -1   3   9   37.81    2.49 
  -1   3   9   38.50    3.34 
   1   3  -9   33.64    3.59 
   1   3  -8  181.08    7.75 
   1   3  -8  177.12    8.06 
  -1   3   8  175.50    8.08 
   1   3  -8  169.90    7.90 
  -1   3   8  164.35    7.99 
  -1   3   8  163.00    7.54 
   1   3  -8  171.36    8.06 
  -1   3   8  178.24    8.25 
   1   3  -8  181.17    8.18 
  -1   3   7  439.37   17.78 
   1   3  -7  424.73   17.64 
   1   3  -7  430.28   17.52 
  -1   3   7  416.80   17.76 
  -1   3   7  430.82   17.27 
  -1   3   7  401.88   17.75 
   1   3  -7  438.02   17.55 
   1   3  -7  430.71   17.73 
   1   3  -7  432.11   17.74 
  -1   3   7  440.53   17.47 
  -1   3   7  421.36   18.01 
   1   3  -6  715.95   28.85 
   1   3  -6  716.44   28.93 
  -1   3   6  741.86   29.12 
  -1   3   6  721.64   29.05 
  -1   3   6  743.90   28.84 
   1   3  -6  744.25   28.87 
  -1   3   6  740.67   28.70 
   1   3  -6  616.80   30.13 
  -1   3   6  710.12   29.08 
  -1   3   6  723.19   30.30 
   1   3  -6  708.18   29.00 
   1   3  -6  706.08   28.69 
   1   3  -6  727.14   28.78 
  -1   3   6  745.89   29.32 
  -1   3   5  744.79   30.79 
  -1   3   5  761.28   30.67 
  -1   3   5  798.28   30.59 
   1   3  -5  769.49   33.42 
  -1   3   5  760.24   30.89 
  -1   3   5  763.83   30.89 
   1   3  -5  783.69   30.71 
   1   3  -5  779.14   30.74 
  -1   3   5  784.43   31.92 
  -1   3   5  745.16   31.42 
   1   3  -5  731.38   31.86 
   1   3  -5  794.40   30.63 
  -1   3   4  202.51    8.39 
   1   3  -4  190.85   10.62 
   1   3  -4  172.04    8.65 
   1   3  -4  198.29    8.58 
   1   3  -4  203.21    8.49 
  -1   3   4  204.79    8.71 
   1   3  -4  196.99    8.40 
   1   3  -4  200.31    8.41 
  -1   3   4  205.99    8.69 
   1   3  -4  208.34    9.35 
   1   3  -4  211.18    8.47 
  -1   3   4  199.98    9.32 
  -1   3   4  193.15    8.46 
  -1   3   4  191.33    8.85 
   1   3  -3   74.95    4.28 
  -1   3   3   75.05    3.86 
   1   3  -3   79.92    5.75 
   1   3  -3   76.37    3.66 
   1   3  -3   76.89    3.86 
   1   3  -3   77.68    3.90 
  -1   3   3   75.20    4.29 
  -1   3   3   81.50    3.65 
  -1   3   3   84.72    4.12 
  -1   3   3   79.04    3.76 
   1   3  -3   79.21    3.82 
  -1   3   3   79.78    3.89 
   1   3  -3   81.70    3.85 
  -1   3   2  180.31    7.14 
   1   3  -2  139.05    6.61 
  -1   3   2  192.24    7.35 
  -1   3   2  176.93    7.07 
   1   3  -2  170.38    7.09 
  -1   3   2  178.40    6.95 
   1   3  -2  176.12    7.45 
   1   3  -2  191.86    7.17 
   1   3  -2  184.02    9.19 
   1   3  -2  168.05    7.29 
   1   3  -2  181.48    7.13 
   1   3  -2  180.97    7.11 
  -1   3   1   89.61    4.06 
  -1   3   1   81.67    3.91 
   1   3  -1   84.38    4.10 
   1   3  -1   88.38    4.12 
   1   3  -1   80.58    4.26 
   1   3  -1   87.21    4.25 
   1   3  -1   90.23    5.74 
   1   3  -1   91.43    4.12 
   1   3  -1   76.50    4.07 
  -1   3   1   84.64    4.08 
  -1   3   1   89.91    5.54 
  -1   3   1   85.69    4.20 
   1   3  -1   92.06    4.26 
   1   3  -1   81.51    4.00 
   1   3   0   24.85    1.97 
   1   3   0   24.45    1.85 
   1   3   0   22.71    1.82 
   1   3   0   23.92    2.03 
   1   3   0   24.37    1.92 
  -1   3   0   21.33    3.00 
   1   3   0   23.38    3.10 
  -1   3   0   24.86    1.73 
   1   3   0   20.21    1.37 
  -1   3   0   22.04    1.80 
   1   3   1  201.92    8.78 
  -1   3  -1  199.16    8.68 
  -1   3  -1  207.63    8.62 
   1   3   1  216.37    8.73 
   1   3   1  215.05    8.82 
  -1   3  -1  202.61    8.62 
   1   3   1  199.24    8.66 
  -1   3  -1  211.39   10.23 
  -1   3  -2   53.19    2.78 
  -1   3  -2   50.04    2.77 
  -1   3  -2   49.44    4.01 
   1   3   2   48.23    2.85 
  -1   3  -2   47.67    2.79 
  -1   3  -2   51.83    2.68 
   1   3   2   50.81    2.94 
   1   3   2   50.20    2.73 
  -1   3  -2   42.80    2.67 
   1   3   2   50.58    3.04 
   1   3   2   52.72    3.06 
   1   3   3  179.03    8.03 
   1   3   3  167.90    7.55 
  -1   3  -3  171.93    9.06 
   1   3   3  165.37    7.34 
   1   3   3  177.95    7.63 
  -1   3  -3  174.11    7.48 
   1   3   3  173.38    7.48 
  -1   3  -3  177.03    7.50 
   1   3   3  165.66    7.70 
  -1   3  -3  172.53    7.42 
  -1   3  -4   34.30    2.41 
   1   3   4   31.33    2.62 
  -1   3  -4   34.63    2.52 
  -1   3  -4   35.89    2.40 
   1   3   4   31.37    2.54 
  -1   3  -4   29.62    2.30 
  -1   3  -4   31.60    3.61 
  -1   3  -4   32.71    2.22 
   1   3   4   35.15    2.43 
  -1   3  -5   63.92    3.49 
  -1   3  -5   67.88    3.70 
   1   3   5   74.49    3.76 
  -1   3  -5   62.50    5.24 
   1   3   5   63.18    3.64 
   1   3   5   57.51    3.61 
  -1   3  -5   64.66    3.72 
  -1   3  -5   71.75    3.64 
  -1   3  -5   70.49    3.50 
   1   3   5   74.27    4.36 
   1   3   6  447.05   17.56 
  -1   3  -6  423.19   17.44 
  -1   3  -6  428.96   17.35 
   1   3   6  412.02   17.45 
   1   3   6  420.50   17.54 
  -1   3  -6  446.26   17.56 
  -1   3  -6  409.99   17.59 
   1   3   6  414.34   18.55 
  -1   3  -6  427.87   17.63 
  -1   3  -7   72.12    4.08 
  -1   3  -7   83.67    4.45 
   1   3   7   78.94    4.35 
   1   3   7   90.04    4.51 
  -1   3  -7   84.06    4.63 
   1   3   7   73.95    4.61 
   1   3   7   80.58    4.32 
   1   3   8   22.15    2.41 
  -1   3  -8   26.27    3.02 
   1   3   8   22.13    2.94 
  -1   3  -8   24.68    2.98 
   1   3   8   25.05    2.57 
  -1   3  -8   23.00    2.17 
   1   3   8   24.82    2.50 
  -1   3  -9  378.20   16.00 
   1   3   9  402.07   15.74 
   1   3   9  359.14   15.79 
   1   3   9  347.09   15.45 
  -1   3  -9  370.42   15.96 
   1   3   9  377.38   15.54 
  -1   3  -9  377.12   16.12 
   1   3  10  887.30   35.30 
   1   3  10  867.28   35.66 
   1   3  10  926.12   35.53 
  -1   3 -10  857.44   35.75 
  -1   3 -10  872.56   35.91 
   1   3  10  895.44   35.33 
  -1   3 -10  859.74   35.95 
  -1   3 -11  191.66    9.74 
   1   3  11  203.37    9.30 
   1   3  11  195.30    8.83 
  -1   3 -11  190.02    9.51 
  -1   3 -11  195.73    9.88 
   1   3  11  209.25    8.91 
   1   3  11  211.53    9.15 
  -1   3 -12   43.53    4.39 
  -1   3 -12   50.80    4.44 
   1   3  12   42.77    3.51 
   1   3  12   40.29    2.85 
   1   3  12   42.86    2.82 
  -1   3 -12   39.88    3.70 
   1   3  12   44.29    3.09 
   1   3  13  146.39    6.68 
   1   3  13  133.66    6.14 
  -1   3 -13  146.22    7.67 
  -1   3 -13  132.49    7.26 
   1   3  13  130.69    5.98 
   1   3  13  127.48    6.16 
  -1   3 -14   36.37    3.61 
   1   3  14   32.80    2.27 
   1   3  14   37.01    2.89 
  -1   3 -14   44.12    4.30 
  -1   3 -15   24.65    2.80 
   1   3  15   30.46    2.24 
  -1   3 -15   30.59    3.58 
  -1   3 -15   26.62    3.63 
   1   3  16   21.57    1.56 
  -1   3 -16   14.98    2.68 
   1   4 -16    5.41    1.77 
  -1   4  15   39.88    2.17 
   1   4 -15   42.72    3.25 
  -1   4  15   46.22    2.38 
   1   4 -14   49.35    3.61 
  -1   4  14   49.53    2.78 
  -1   4  14   49.16    2.97 
  -1   4  14   51.42    2.91 
   1   4 -14   45.43    3.96 
  -1   4  13   32.72    2.77 
  -1   4  13   31.31    2.47 
   1   4 -13   33.87    3.75 
  -1   4  13   34.84    2.51 
   1   4 -13   22.69    3.05 
   1   4 -13   29.62    3.27 
  -1   4  12  237.05   10.52 
  -1   4  12  250.01   10.42 
   1   4 -12  225.49   10.82 
   1   4 -12  234.72   11.29 
  -1   4  12  241.09   10.33 
   1   4 -12  225.58   10.78 
  -1   4  11   36.76    3.34 
   1   4 -11   30.34    3.30 
  -1   4  11   35.29    3.01 
  -1   4  11   38.43    3.17 
   1   4 -11   39.23    3.90 
   1   4 -10   16.31    3.41 
   1   4 -10   21.24    2.71 
  -1   4  10   23.20    2.72 
  -1   4  10   18.19    1.81 
  -1   4  10   18.22    2.76 
  -1   4  10   20.08    2.66 
  -1   4   9   66.56    4.44 
  -1   4   9   73.80    3.85 
  -1   4   9   69.61    4.50 
   1   4  -9   69.54    4.84 
  -1   4   9   72.77    4.52 
   1   4  -9   64.34    5.00 
  -1   4   8  124.98    6.30 
  -1   4   8  121.17    5.91 
   1   4  -8  120.34    6.74 
  -1   4   8  142.24    6.64 
  -1   4   8  129.54    6.65 
  -1   4   8  125.77    5.69 
   1   4  -8  115.36    6.55 
   1   4  -7  267.83   11.90 
   1   4  -7  271.13   11.68 
  -1   4   7  293.45   12.30 
   1   4  -7  280.16   12.29 
  -1   4   7  283.03   11.82 
  -1   4   7  270.98   12.17 
  -1   4   7  286.51   11.64 
  -1   4   7  264.96   11.92 
   1   4  -6   61.94    4.12 
   1   4  -6   64.12    3.58 
  -1   4   6   63.56    4.42 
   1   4  -6   67.55    3.90 
  -1   4   6   62.88    3.54 
  -1   4   6   57.96    3.67 
  -1   4   6   58.97    4.17 
  -1   4   6   68.23    4.05 
  -1   4   5   20.60    2.05 
  -1   4   5   18.44    1.67 
   1   4  -5   19.46    2.47 
  -1   4   5   19.76    2.66 
  -1   4   5   17.75    2.76 
  -1   4   5   19.70    2.36 
   1   4  -5   16.75    2.39 
  -1   4   5   17.39    2.78 
   1   4  -5   20.75    2.65 
  -1   4   4  127.27    6.46 
   1   4  -4  130.89    6.30 
  -1   4   4  135.70    6.11 
   1   4  -4  136.26    6.39 
   1   4  -4  130.64    6.28 
  -1   4   4  123.84    6.49 
  -1   4   4  119.36    6.15 
   1   4  -4  137.24    6.18 
  -1   4   4  129.54    6.56 
   1   4  -4  128.37    6.15 
  -1   4   4  133.66    5.84 
  -1   4   3   38.52    2.78 
   1   4  -3   40.10    2.86 
  -1   4   3   40.55    3.30 
  -1   4   3   40.37    2.86 
  -1   4   3   34.56    3.38 
  -1   4   3   39.26    3.24 
   1   4  -3   38.83    3.06 
   1   4  -3   39.22    2.84 
  -1   4   3   40.87    2.50 
   1   4  -3   43.06    2.69 
   1   4  -3   44.36    2.92 
   1   4  -3   44.95    3.13 
   1   4  -2   74.80    3.94 
   1   4  -2   72.54    3.83 
  -1   4   2   71.16    4.27 
   1   4  -2   71.99    3.96 
   1   4  -2   70.49    3.57 
  -1   4   2   66.77    3.62 
  -1   4   2   67.28    3.91 
   1   4  -2   66.55    3.92 
  -1   4   2   63.71    4.08 
  -1   4   2   68.73    3.79 
  -1   4   1  323.66   13.85 
   1   4  -1  337.98   13.71 
   1   4  -1  347.31   13.93 
  -1   4   1  311.82   13.84 
  -1   4   1  336.59   13.58 
   1   4  -1  320.80   13.91 
  -1   4   1  312.17   13.90 
   1   4  -1  324.02   13.93 
   1   4  -1  363.46   13.99 
  -1   4   1  337.62   13.71 
   1   4  -1  328.06   13.83 
  -1   4   0  694.99   27.54 
   1   4   0  702.86   27.61 
  -1   4   0  689.93   27.41 
   1   4   0  663.07   27.51 
   1   4   0  682.55   27.50 
  -1   4   0  699.39   27.36 
   1   4   0  695.37   27.61 
   1   4   0  650.38   27.48 
  -1   4   0  646.26   27.47 
   1   4   0  720.36   27.31 
   1   4   0  671.03   27.60 
  -1   4  -1   12.30    2.08 
  -1   4  -1   11.73    1.76 
  -1   4  -1   12.64    1.85 
  -1   4  -1   12.66    1.92 
  -1   4  -1   12.28    1.55 
   1   4   1   14.15    2.31 
  -1   4  -1   10.58    2.06 
   1   4   1   15.76    2.02 
   1   4   1   12.20    2.21 
   1   4   1   13.20    1.38 
  -1   4  -2   41.23    2.93 
  -1   4  -2   48.40    3.01 
   1   4   2   40.07    2.88 
  -1   4  -2   44.56    2.71 
  -1   4  -2   42.41    2.98 
   1   4   2   42.34    3.35 
   1   4   2   43.70    3.29 
  -1   4  -3  334.20   14.92 
   1   4   3  356.03   15.20 
   1   4   3  379.38   15.16 
   1   4   3  370.17   15.33 
   1   4   3  364.83   14.90 
   1   4   3  382.37   15.25 
  -1   4  -3  364.80   15.07 
  -1   4  -3  340.30   15.06 
   1   4   4   95.78    4.79 
   1   4   4  105.17    5.24 
  -1   4  -4   95.61    5.12 
   1   4   4   99.77    5.62 
   1   4   4   90.23    5.31 
  -1   4  -4   95.57    4.99 
   1   4   4  103.97    5.37 
  -1   4  -4  100.71    5.30 
  -1   4  -4  100.61    5.23 
  -1   4  -5   22.88    2.77 
  -1   4  -5   26.83    2.70 
   1   4   5   18.18    1.83 
  -1   4  -5   19.42    2.41 
  -1   4  -5   17.77    2.62 
  -1   4  -5   21.02    2.67 
   1   4   5   18.23    2.75 
   1   4   5   21.83    2.67 
  -1   4  -6  388.51   16.47 
  -1   4  -6  396.58   16.86 
   1   4   6  393.24   16.63 
   1   4   6  409.86   16.75 
  -1   4  -6  440.52   16.88 
   1   4   6  410.16   16.25 
   1   4   7  165.32    7.84 
   1   4   7  160.64    7.86 
   1   4   7  185.38    8.15 
  -1   4  -7  174.66    8.38 
  -1   4  -7  165.22    8.32 
  -1   4  -7  161.86    7.66 
  -1   4  -8  223.03   10.35 
  -1   4  -8  247.61   11.20 
   1   4   8  240.66   10.28 
   1   4   8  246.07   10.96 
   1   4   8  248.17   10.60 
   1   4   8  255.32   10.83 
  -1   4  -8  226.28   11.09 
   1   4   8  242.45   10.60 
   1   4   9  304.59   12.92 
   1   4   9  302.64   13.31 
  -1   4  -9  295.55   13.65 
   1   4   9  325.49   13.29 
  -1   4  -9  297.09   13.71 
   1   4   9  297.39   12.56 
   1   4   9  314.03   12.92 
  -1   4  -9  283.44   13.00 
  -1   4 -10   21.50    2.91 
   1   4  10   25.33    2.99 
   1   4  10   32.64    2.61 
   1   4  10   29.85    2.52 
   1   4  10   32.02    3.06 
  -1   4 -10   24.05    3.73 
   1   4  11  191.72    8.39 
   1   4  11  193.89    8.35 
   1   4  11  207.32    8.82 
  -1   4 -11  184.86    9.36 
   1   4  11  192.02    8.76 
  -1   4 -11  170.94    9.51 
  -1   4 -11  175.33    8.87 
  -1   4 -12   43.87    4.66 
  -1   4 -12   46.01    3.80 
   1   4  12   45.52    2.65 
   1   4  12   46.19    3.20 
   1   4  12   46.99    3.20 
  -1   4 -12   44.72    3.97 
   1   4  12   43.25    2.78 
  -1   4 -13  161.34    8.31 
  -1   4 -13  163.74    8.62 
   1   4  13  170.89    7.47 
   1   4  13  162.44    7.07 
   1   4  14  140.21    6.21 
  -1   4 -14  139.73    6.98 
  -1   4 -14  135.26    7.30 
  -1   4 -15   34.74    2.66 
  -1   4 -15   39.13    3.23 
   1   4  15   38.63    2.11 
   1   5 -14   61.37    3.59 
   1   5 -13   99.67    5.52 
  -1   5  13  114.31    4.87 
  -1   5  12   19.19    1.78 
  -1   5  12   18.10    2.06 
   1   5 -12   14.54    2.84 
   1   5 -12   18.97    3.26 
   1   5 -12   16.22    2.83 
  -1   5  12   17.93    1.89 
   1   5 -11  162.88    8.56 
  -1   5  11  177.70    7.83 
  -1   5  11  168.15    8.00 
  -1   5  11  182.59    7.84 
   1   5 -11  178.42    8.93 
  -1   5  10   49.30    3.37 
   1   5 -10   43.81    4.39 
  -1   5  10   46.71    2.65 
  -1   5  10   46.80    3.67 
   1   5 -10   45.09    4.32 
  -1   5  10   56.12    3.34 
  -1   5   9  120.22    6.00 
   1   5  -9  112.89    6.64 
  -1   5   9  116.38    5.84 
  -1   5   9  107.00    5.26 
   1   5  -9  109.90    6.51 
  -1   5   8   34.35    3.34 
   1   5  -8   37.21    3.83 
  -1   5   8   34.09    3.32 
  -1   5   8   32.89    2.24 
  -1   5   8   33.46    2.52 
  -1   5   8   37.33    3.73 
   1   5  -7   41.70    4.08 
   1   5  -7   38.30    2.86 
  -1   5   7   47.48    3.12 
   1   5  -7   45.19    3.96 
   1   5  -7   40.18    3.45 
  -1   5   7   42.18    3.71 
  -1   5   7   46.06    3.97 
  -1   5   7   48.11    2.84 
  -1   5   7   47.90    3.98 
   1   5  -6   69.19    4.05 
   1   5  -6   80.26    4.94 
  -1   5   6   71.57    4.81 
  -1   5   6   73.66    5.04 
  -1   5   6   72.19    4.15 
  -1   5   6   72.47    4.00 
  -1   5   6   76.53    4.93 
   1   5  -6   68.43    4.52 
   1   5  -6   73.86    4.55 
   1   5  -5   42.45    3.57 
  -1   5   5   43.47    2.63 
   1   5  -5   42.86    3.32 
  -1   5   5   45.97    3.99 
  -1   5   5   47.88    3.16 
  -1   5   5   47.46    3.19 
   1   5  -5   46.94    3.94 
   1   5  -5   47.77    3.60 
  -1   5   5   53.42    4.15 
   1   5  -5   43.16    3.26 
   1   5  -4  315.44   13.75 
  -1   5   4  352.19   14.05 
   1   5  -4  318.08   13.64 
   1   5  -4  314.70   13.67 
  -1   5   4  302.31   13.51 
   1   5  -4  300.78   13.37 
  -1   5   4  317.94   13.46 
  -1   5   4  318.85   13.12 
  -1   5   4  307.93   13.90 
  -1   5   3  109.09    6.10 
   1   5  -3  104.22    5.28 
  -1   5   3  109.47    5.58 
  -1   5   3  106.75    5.25 
   1   5  -3  110.80    5.81 
  -1   5   3  111.21    5.60 
  -1   5   3  113.04    6.32 
   1   5  -3  106.67    5.75 
   1   5  -2  270.98   11.71 
  -1   5   2  258.16   11.30 
   1   5  -2  283.97   11.79 
   1   5  -2  269.77   11.72 
  -1   5   2  269.25   11.57 
  -1   5   2  262.99   11.58 
   1   5  -2  262.74   11.49 
  -1   5   2  241.63   11.77 
   1   5  -2  267.04   11.72 
  -1   5   1  118.33    6.06 
   1   5  -1  116.95    5.72 
  -1   5   1  116.80    5.78 
  -1   5   1  125.20    6.12 
   1   5  -1  123.41    6.30 
   1   5  -1  110.31    6.05 
  -1   5   1  110.32    6.17 
   1   5  -1  117.98    6.11 
   1   5  -1  122.07    6.23 
   1   5   0  171.45    7.95 
  -1   5   0  181.99    8.58 
  -1   5   0  182.01    8.22 
   1   5   0  187.32    8.44 
  -1   5   0  171.61    8.09 
   1   5   0  201.03    8.69 
   1   5   0  179.16    8.50 
   1   5   0  181.25    8.41 
  -1   5  -1  157.40    7.70 
   1   5   1  175.95    8.12 
  -1   5  -1  149.58    7.89 
   1   5   1  179.92    7.93 
   1   5   1  171.85    7.74 
  -1   5  -1  157.85    7.66 
   1   5   2  209.20    9.52 
   1   5   2  218.35    9.77 
  -1   5  -2  211.99    9.69 
   1   5   2  222.50    9.94 
  -1   5  -2  210.29    9.71 
   1   5   2  208.22    9.68 
  -1   5  -2  223.63    9.86 
  -1   5  -3  168.19    7.75 
  -1   5  -3  158.71    7.86 
  -1   5  -3  160.16    8.13 
   1   5   3  179.69    7.77 
   1   5   3  169.35    8.22 
  -1   5  -3  186.09    8.22 
   1   5   3  166.19    8.07 
  -1   5  -3  154.51    7.98 
   1   5   3  166.41    8.24 
   1   5   3  173.18    8.39 
   1   5   4   30.92    3.28 
   1   5   4   34.61    3.62 
   1   5   4   30.15    2.99 
  -1   5  -4   35.00    2.89 
   1   5   4   31.03    2.54 
   1   5   4   37.31    3.82 
  -1   5  -4   36.08    3.39 
  -1   5  -4   34.83    3.06 
  -1   5  -4   28.05    3.31 
  -1   5  -5   -1.43    2.34 
  -1   5  -5    1.65    2.13 
  -1   5  -5    3.21    2.99 
   1   5   5    1.31    1.96 
   1   5   5   -0.12    2.78 
   1   5   5    1.71    1.43 
  -1   5  -5   -1.32    2.55 
   1   5   5    3.53    2.45 
   1   5   5    0.92    2.71 
   1   5   6   42.56    3.97 
   1   5   6   45.88    3.40 
   1   5   6   40.78    2.94 
   1   5   6   42.63    2.58 
  -1   5  -6   41.97    4.15 
  -1   5  -6   43.84    3.25 
  -1   5  -6   37.35    3.06 
  -1   5  -6   39.00    3.73 
  -1   5  -7  332.24   14.47 
   1   5   7  366.16   14.70 
  -1   5  -7  346.24   14.78 
   1   5   7  341.80   14.40 
  -1   5  -7  364.21   15.18 
  -1   5  -7  310.39   15.22 
  -1   5  -8    2.33    3.00 
   1   5   8    6.15    1.54 
  -1   5  -8    2.67    2.36 
  -1   5  -8    5.97    1.75 
   1   5   8    6.87    1.89 
   1   5   8    4.74    2.61 
  -1   5  -9   75.40    5.49 
   1   5   9   74.31    3.70 
   1   5   9   74.92    4.54 
  -1   5  -9   70.77    5.15 
   1   5   9   75.48    4.02 
   1   5   9   68.69    4.59 
  -1   5  -9   77.01    4.76 
   1   5  10   66.89    4.14 
  -1   5 -10   74.13    5.28 
   1   5  10   76.21    3.81 
  -1   5 -10   73.05    4.81 
  -1   5 -10   77.15    5.21 
  -1   5 -11    8.56    3.25 
   1   5  11   10.08    1.32 
  -1   5 -11    9.82    2.75 
   1   5  11   11.62    2.03 
  -1   5 -12    0.10    2.43 
   1   5  12    0.23    1.37 
   1   5  13  113.60    4.74 
  -1   5 -13   91.13    5.26 
   1   6 -11   55.88    3.27 
  -1   6  11   53.55    2.57 
  -1   6  10  144.86    6.20 
   1   6 -10  141.59    6.85 
   1   6  -9   12.30    2.41 
  -1   6   9   11.10    1.59 
   1   6  -8   82.00    4.72 
  -1   6   8   89.00    4.33 
  -1   6   8   89.06    4.04 
   1   6  -8   90.19    5.31 
  -1   6   8   79.15    3.83 
   1   6  -7   27.71    2.72 
  -1   6   7   32.30    2.22 
  -1   6   7   28.06    2.04 
  -1   6   7   27.63    2.57 
   1   6  -7   30.18    3.64 
   1   6  -7   28.76    2.16 
  -1   6   6    5.03    1.54 
   1   6  -6    2.13    1.76 
   1   6  -6    4.54    2.82 
  -1   6   6    4.68    2.24 
   1   6  -6    4.05    1.71 
   1   6  -5   50.97    3.44 
  -1   6   5   57.62    3.87 
  -1   6   5   57.55    3.49 
   1   6  -5   55.92    4.05 
   1   6  -5   49.60    3.92 
   1   6  -4    7.82    2.06 
   1   6  -4    9.10    2.55 
   1   6  -4   12.02    2.62 
  -1   6   4   12.71    2.15 
  -1   6   4    9.09    2.71 
  -1   6   4   12.80    1.46 
  -1   6   3   82.02    4.93 
  -1   6   3   75.14    3.97 
   1   6  -3   78.81    4.80 
   1   6  -3   77.65    4.62 
   1   6  -3   76.93    4.52 
   1   6  -2  228.04   10.27 
   1   6  -2  237.08   10.63 
   1   6  -2  239.26   10.67 
  -1   6   2  236.81   10.17 
  -1   6   2  234.85   10.66 
   1   6  -1   78.88    4.51 
   1   6  -1   74.80    4.74 
  -1   6   1   81.93    4.34 
   1   6  -1   78.37    4.18 
  -1   6   0   81.96    4.64 
   1   6   0   83.63    5.06 
   1   6   0   89.08    4.98 
   1   6   0   83.57    4.79 
  -1   6  -1   56.37    3.78 
   1   6   1   57.27    3.67 
  -1   6  -1   58.57    3.57 
   1   6   1   61.61    3.97 
  -1   6  -1   51.92    4.00 
   1   6   2    7.24    2.22 
  -1   6  -2    9.86    2.19 
   1   6   2    7.95    1.91 
   1   6   2    9.63    2.33 
  -1   6  -2   10.27    2.85 
  -1   6  -2   10.37    2.54 
  -1   6  -2   10.14    2.47 
  -1   6  -3   71.95    4.37 
   1   6   3   70.41    3.97 
  -1   6  -3   72.69    4.57 
   1   6   3   71.89    4.34 
  -1   6  -3   79.79    4.69 
   1   6   3   75.75    4.46 
   1   6   3   73.89    4.66 
   1   6   4   73.32    4.40 
   1   6   4   72.21    4.27 
  -1   6  -4   77.63    4.73 
   1   6   4   71.16    3.75 
   1   6   4   66.93    4.11 
  -1   6  -4   70.11    4.23 
  -1   6  -4   74.75    4.64 
   1   6   5  120.56    6.30 
  -1   6  -5  124.34    6.54 
   1   6   5  125.47    6.00 
   1   6   5  115.96    5.79 
   1   6   5  116.17    5.35 
   1   6   5  123.49    5.83 
  -1   6  -5  122.21    6.04 
  -1   6  -5  110.12    5.69 
   1   6   6    1.64    2.47 
   1   6   6    0.14    1.51 
   1   6   6    1.67    1.83 
  -1   6  -6   -0.60    2.88 
   1   6   6    0.94    1.46 
  -1   6  -6    0.48    1.76 
  -1   6  -6    0.88    1.84 
  -1   6  -7   17.68    2.01 
   1   6   7   18.30    2.03 
   1   6   7   17.95    1.84 
   1   6   7   17.37    1.75 
  -1   6  -7   18.87    2.53 
  -1   6  -7   25.57    3.35 
  -1   6  -8  164.38    7.81 
   1   6   8  147.62    6.60 
   1   6   8  157.11    6.73 
  -1   6  -8  150.19    7.25 
   1   6   9   30.17    1.89 
   1   6   9   29.70    1.77 
   1   6   9   27.91    2.18 
  -1   6  -9   32.00    2.89 
  -1   6 -10    0.53    1.85 
   1   6  10    1.37    1.11 
   1   6  10    2.12    0.64 
  -1   7   7    4.61    0.82 
  -1   7   6    3.33    0.70 
  -1   7   6    4.26    1.07 
  -1   7   5   20.34    1.52 
   1   7  -5   21.49    1.60 
  -1   7   5   25.40    1.84 
   1   7  -4   34.98    2.35 
  -1   7   4   36.97    2.24 
  -1   7   4   40.06    2.52 
  -1   7   3   17.96    1.78 
   1   7  -3   15.67    1.93 
  -1   7   3   21.78    2.12 
   1   7  -2   34.73    2.55 
  -1   7   2   34.40    2.37 
  -1   7   2   35.26    2.70 
   1   7  -1  265.47   10.60 
  -1   7   1  251.93   10.47 
   1   7  -1  233.05   10.51 
  -1   7   1  237.42   10.61 
   1   7   0  286.38   12.79 
   1   7   0  310.50   12.72 
   1   7   0  321.46   12.83 
   1   7   1  102.59    4.72 
   1   7   1  109.71    4.92 
   1   7   2  122.34    5.70 
   1   7   2  121.76    5.46 
  -1   7  -2  120.19    5.82 
   1   7   2  131.30    5.67 
   1   7   3   60.81    3.15 
   1   7   3   57.30    3.23 
  -1   7  -3   60.84    3.39 
   1   7   4   11.55    1.42 
  -1   7  -4   12.75    1.73 
   1   7   4   10.38    1.34 
   1   7   5   34.46    1.90 
   1   7   5   36.58    2.00 
  -1   7  -5   32.12    2.12 
   1   7   6    5.41    0.79 
  -2  -7   7   13.75    1.54 
  -2  -7   7   15.11    1.50 
  -2  -7   6   38.13    2.47 
  -2  -7   6   32.83    2.24 
  -2  -7   6   33.46    2.32 
   2  -7  -6   31.91    2.63 
  -2  -7   5   25.18    2.28 
   2  -7  -5   24.15    2.69 
  -2  -7   5   28.16    2.51 
  -2  -7   5   27.13    2.22 
  -2  -7   4   71.41    4.20 
   2  -7  -4   71.01    4.21 
  -2  -7   4   70.53    3.97 
  -2  -7   4   72.39    4.21 
  -2  -7   3   13.09    2.31 
  -2  -7   3   14.96    2.54 
   2  -7  -3   15.00    2.24 
   2  -7  -2   94.26    5.26 
  -2  -7   2  111.10    5.81 
  -2  -7   2  102.09    5.49 
  -2  -7   1    4.24    2.57 
   2  -7  -1    7.05    2.29 
  -2  -7   1    8.99    2.49 
  -2  -7   0   -2.02    2.66 
   2  -7   0   -0.18    2.02 
  -2  -7   0    4.60    2.53 
  -2  -7  -1    6.39    1.98 
  -2  -7  -1    6.19    2.71 
  -2  -7  -2   95.14    5.49 
  -2  -7  -2   99.90    5.15 
  -2  -7  -3   54.22    3.57 
  -2  -7  -3   50.50    3.28 
   2  -7   3   58.30    3.54 
  -2  -7  -3   54.44    4.02 
  -2  -7  -4   60.61    3.67 
   2  -7   4   63.17    3.52 
  -2  -7  -4   52.41    3.36 
   2  -7   4   60.46    3.77 
   2  -7   5   14.40    1.98 
  -2  -7  -5   13.69    2.21 
   2  -7   5   11.86    1.70 
  -2  -7  -5   10.47    1.84 
   2  -7   6    8.05    1.23 
  -2  -7  -6    9.66    1.84 
   2  -7   6    8.37    1.54 
  -2  -7  -6    4.84    1.89 
  -2  -6  11   18.15    1.41 
   2  -6 -11   20.54    2.55 
  -2  -6  11   24.49    2.05 
  -2  -6  11   20.08    1.73 
  -2  -6  10   62.58    3.18 
   2  -6 -10   59.19    4.16 
  -2  -6  10   71.44    3.71 
  -2  -6  10   67.14    3.77 
  -2  -6  10   60.68    3.72 
  -2  -6   9   24.58    2.70 
  -2  -6   9   24.92    2.61 
  -2  -6   9   24.21    2.84 
  -2  -6   9   23.20    2.10 
  -2  -6   8   12.47    2.72 
  -2  -6   8   18.68    2.80 
  -2  -6   8   18.36    2.73 
  -2  -6   8   13.70    2.19 
  -2  -6   7   69.82    4.89 
   2  -6  -7   71.77    4.65 
  -2  -6   7   65.78    4.55 
  -2  -6   7   74.83    4.90 
  -2  -6   7   58.63    4.43 
  -2  -6   6    9.17    3.41 
  -2  -6   6   11.86    3.28 
   2  -6  -6    7.08    2.64 
   2  -6  -5    9.55    2.49 
  -2  -6   5   13.00    3.30 
  -2  -6   5    9.34    3.59 
  -2  -6   4   87.66    6.27 
  -2  -6   4   97.47    6.01 
  -2  -6   3   37.75    4.51 
   2  -6  -3   39.77    3.24 
  -2  -6   3   41.38    4.28 
  -2  -6   3   38.32    3.59 
  -2  -6   2   23.34    4.02 
  -2  -6   2   18.60    3.30 
  -2  -6   1  135.97    7.16 
  -2  -6   1  130.35    6.80 
  -2  -6   1  129.49    7.58 
   2  -6   0   89.89    5.49 
  -2  -6   0   87.36    5.41 
  -2  -6   0   91.45    6.39 
  -2  -6   0   95.38    5.78 
   2  -6   1   82.13    5.10 
  -2  -6  -1   89.31    5.52 
  -2  -6  -1   85.18    5.53 
  -2  -6  -2   13.94    3.28 
  -2  -6  -2   14.07    3.44 
   2  -6   2   15.10    3.28 
   2  -6   3  301.57   13.41 
   2  -6   3  312.72   13.56 
  -2  -6  -3  295.24   13.66 
  -2  -6  -3  298.80   13.72 
  -2  -6  -4  186.84    9.41 
  -2  -6  -4  180.73    9.38 
  -2  -6  -4  184.96    8.79 
   2  -6   4  194.39    8.98 
   2  -6   4  193.42    8.95 
  -2  -6  -5  133.61    7.30 
   2  -6   5  133.95    6.51 
  -2  -6  -5  123.22    6.67 
  -2  -6  -5  135.22    7.40 
   2  -6   5  135.45    6.70 
  -2  -6  -6   26.75    3.12 
   2  -6   6   24.95    2.62 
  -2  -6  -6   22.27    3.87 
   2  -6   6   20.49    3.49 
   2  -6   6   22.33    3.12 
   2  -6   7   19.10    2.83 
  -2  -6  -7   18.76    3.65 
   2  -6   7   21.01    2.32 
  -2  -6  -7   23.35    3.07 
   2  -6   7   22.82    3.37 
  -2  -6  -8  265.96   12.64 
   2  -6   8  324.03   12.93 
   2  -6   8  287.89   12.25 
  -2  -6  -8  286.53   13.14 
   2  -6   8  310.37   12.66 
  -2  -6  -9   49.25    3.49 
   2  -6   9   49.36    2.99 
   2  -6   9   42.23    2.97 
  -2  -6  -9   46.43    3.93 
   2  -6   9   50.36    3.34 
  -2  -6  -9   41.73    3.58 
  -2  -6 -10   17.34    2.28 
   2  -6  10   19.09    1.70 
   2  -6  10   20.32    1.98 
   2  -6  10   19.12    1.82 
  -2  -6 -10   19.40    2.54 
   2  -5 -14   54.45    3.59 
  -2  -5  14   51.45    2.63 
   2  -5 -14   53.63    3.34 
   2  -5 -13   43.91    3.54 
  -2  -5  13   43.24    2.79 
  -2  -5  13   36.48    2.19 
  -2  -5  12   68.31    3.61 
   2  -5 -12   68.98    4.75 
  -2  -5  12   76.51    4.28 
  -2  -5  12   74.40    3.81 
  -2  -5  11   15.20    2.01 
   2  -5 -11   15.14    3.18 
  -2  -5  11   14.76    2.79 
  -2  -5  11   12.63    1.99 
  -2  -5  11   18.25    2.98 
  -2  -5  10   62.61    4.05 
   2  -5 -10   60.66    4.56 
  -2  -5  10   61.04    4.43 
  -2  -5  10   70.35    4.75 
  -2  -5   9   48.16    4.12 
  -2  -5   9   41.36    4.13 
   2  -5  -9   39.22    3.71 
  -2  -5   9   40.77    3.59 
  -2  -5   8   25.94    4.29 
  -2  -5   8   33.80    3.88 
  -2  -5   8   27.84    3.79 
   2  -5  -8   33.93    3.23 
  -2  -5   7   63.66    5.59 
   2  -5  -7   73.51    4.36 
  -2  -5   6   53.39    5.13 
  -2  -5   6   46.71    4.62 
  -2  -5   5  242.52   12.03 
  -2  -5   5  251.62   11.75 
  -2  -5   4  207.09   10.76 
  -2  -5   4  208.10    9.62 
  -2  -5   4  201.63   10.36 
  -2  -5   4  209.21    9.92 
  -2  -5   3  152.20    8.75 
  -2  -5   3  168.06    8.44 
  -2  -5   3  165.24    8.12 
  -2  -5   2   43.99    4.66 
  -2  -5   2   42.44    4.19 
  -2  -5   2   44.65    3.96 
  -2  -5   1  261.81   11.82 
  -2  -5   1  247.85   11.66 
  -2  -5   0   72.09    5.01 
  -2  -5   0   63.90    5.04 
  -2  -5  -1  218.83   10.21 
  -2  -5  -1  238.06   10.92 
   2  -5   2  212.23   10.42 
  -2  -5  -2  225.65   10.39 
   2  -5   3  183.99    9.09 
   2  -5   3  194.41    9.59 
  -2  -5  -3  204.16    9.98 
  -2  -5  -3  202.29    9.38 
   2  -5   4   17.08    3.25 
  -2  -5  -4   20.91    2.77 
  -2  -5  -4   19.46    4.15 
  -2  -5  -4   22.59    3.43 
   2  -5   5   38.74    3.71 
   2  -5   5   38.12    3.66 
  -2  -5  -5   43.28    4.24 
  -2  -5  -5   42.08    3.60 
   2  -5   6  161.38    8.04 
  -2  -5  -6  164.86    8.64 
   2  -5   6  171.60    8.32 
  -2  -5  -6  164.38    8.27 
   2  -5   7   71.23    5.70 
  -2  -5  -7   90.97    5.88 
   2  -5   7   75.57    5.34 
  -2  -5  -7   72.58    4.37 
   2  -5   7   78.65    4.98 
  -2  -5  -7   75.30    5.11 
   2  -5   8  117.18    6.62 
  -2  -5  -8  115.84    6.66 
  -2  -5  -8  116.17    6.99 
   2  -5   8  119.02    6.90 
  -2  -5  -8  109.39    5.94 
   2  -5   8  118.90    6.26 
  -2  -5  -9   39.88    4.75 
   2  -5   9   45.59    3.81 
   2  -5   9   45.80    3.64 
  -2  -5  -9   49.25    4.43 
  -2  -5  -9   46.93    3.56 
   2  -5   9   50.61    4.55 
   2  -5  10   72.86    4.62 
  -2  -5 -10   73.78    5.47 
  -2  -5 -10   65.28    5.13 
  -2  -5 -10   60.84    4.18 
   2  -5  10   71.37    4.42 
   2  -5  10   70.47    4.15 
   2  -5  10   77.90    4.98 
  -2  -5 -11   81.42    5.37 
  -2  -5 -11   72.02    5.37 
   2  -5  11   87.82    4.76 
  -2  -5 -11   84.33    4.79 
   2  -5  11   91.51    4.81 
   2  -5  11   86.79    4.66 
  -2  -5 -11   84.67    5.73 
   2  -5  11   87.25    4.96 
   2  -5  11   84.34    4.43 
  -2  -5 -12  105.48    5.33 
  -2  -5 -12  108.26    5.93 
   2  -5  12  107.83    5.21 
  -2  -5 -12  102.04    6.04 
   2  -5  12  115.51    5.44 
   2  -5  12  115.83    5.15 
   2  -5  12   98.96    4.76 
   2  -5  12  115.25    5.27 
  -2  -5 -13   38.44    3.13 
   2  -5  13   42.36    2.38 
   2  -5  13   42.23    2.42 
   2  -4 -16   22.40    2.62 
   2  -4 -16   25.46    2.35 
  -2  -4  15   93.92    4.62 
   2  -4 -15   88.58    5.74 
   2  -4 -15  102.14    5.46 
   2  -4 -14   21.61    2.79 
   2  -4 -14   19.76    3.92 
  -2  -4  14   18.99    1.78 
   2  -4 -14   22.77    3.49 
   2  -4 -13   19.32    3.56 
  -2  -4  13   15.00    2.05 
   2  -4 -13   16.92    2.92 
  -2  -4  13   11.86    1.86 
  -2  -4  13   13.50    1.84 
  -2  -4  13   17.81    2.87 
   2  -4 -12   43.26    3.92 
  -2  -4  12   51.97    4.13 
  -2  -4  12   53.55    3.58 
   2  -4 -12   44.33    4.41 
  -2  -4  12   51.57    4.23 
  -2  -4  12   47.82    3.45 
  -2  -4  12   45.61    3.18 
  -2  -4  11   18.45    2.74 
   2  -4 -11   16.21    2.70 
  -2  -4  11   13.44    3.28 
   2  -4 -11   11.78    3.18 
  -2  -4  11   14.09    3.43 
  -2  -4  10    7.55    2.70 
   2  -4 -10    3.92    2.20 
  -2  -4  10    3.30    2.78 
  -2  -4  10    3.67    3.20 
   2  -4  -9  155.89    7.27 
  -2  -4   9  156.24    8.15 
  -2  -4   9  143.56    7.95 
  -2  -4   8  162.16    8.33 
  -2  -4   8  159.40    8.77 
  -2  -4   7    3.85    3.96 
  -2  -4   6   27.47    4.15 
  -2  -4   6   26.76    3.70 
  -2  -4   5  176.50    9.04 
  -2  -4   5  174.90    8.18 
  -2  -4   5  171.39    8.34 
  -2  -4   5  168.26    8.61 
  -2  -4   4    9.74    2.74 
  -2  -4   4   11.65    2.81 
  -2  -4   4    9.47    3.22 
  -2  -4   3  248.56   10.96 
  -2  -4   3  240.96   11.03 
  -2  -4   3  245.46   11.27 
  -2  -4   2   90.05    5.24 
  -2  -4   2  101.20    5.43 
  -2  -4   1  561.14   22.53 
  -2  -4   1  549.87   22.80 
  -2  -4   1  548.25   22.83 
  -2  -4   0  242.68   10.56 
  -2  -4   0  241.64   10.94 
  -2  -4  -1  686.86   27.72 
  -2  -4  -1  693.31   27.92 
  -2  -4  -2  129.54    6.12 
  -2  -4  -2  122.27    6.33 
   2  -4   3  166.03    7.90 
  -2  -4  -3  173.48    8.13 
  -2  -4  -3  166.26    7.89 
  -2  -4  -4   31.80    3.19 
  -2  -4  -4   34.35    2.82 
   2  -4   4   32.07    3.31 
  -2  -4  -5   98.48    5.63 
   2  -4   5   90.45    5.43 
   2  -4   5   98.17    5.62 
  -2  -4  -5   93.50    5.12 
  -2  -4  -6  281.52   12.42 
  -2  -4  -6  272.88   12.02 
   2  -4   6  257.03   12.03 
   2  -4   6  282.93   12.36 
  -2  -4  -7  226.28   11.10 
  -2  -4  -7  247.70   10.79 
   2  -4   7  223.08   10.73 
   2  -4   7  235.28   11.10 
   2  -4   8  250.85   11.44 
  -2  -4  -8  266.83   11.64 
   2  -4   8  237.83   11.71 
  -2  -4  -8  268.64   12.10 
   2  -4   8  227.95   11.81 
   2  -4   9   39.37    3.56 
   2  -4   9   42.02    3.93 
  -2  -4  -9   41.12    3.32 
   2  -4   9   37.87    4.54 
  -2  -4  -9   43.88    5.07 
  -2  -4  -9   44.54    4.13 
   2  -4  10   37.44    3.49 
   2  -4  10   34.87    4.29 
  -2  -4 -10   35.87    4.21 
  -2  -4 -10   26.60    4.54 
  -2  -4 -10   34.15    3.18 
   2  -4  10   35.11    3.87 
  -2  -4 -11  137.55    8.18 
  -2  -4 -11  128.38    7.48 
   2  -4  11  125.52    6.96 
   2  -4  11  137.21    7.04 
   2  -4  11  145.49    7.14 
   2  -4  11  129.83    6.99 
  -2  -4 -11  119.12    6.63 
   2  -4  11  135.93    6.81 
   2  -4  11  141.02    7.34 
  -2  -4 -12   78.18    5.92 
   2  -4  12   73.36    4.73 
   2  -4  12   72.71    4.67 
   2  -4  12   85.78    5.17 
   2  -4  12   69.27    4.36 
  -2  -4 -12   75.43    5.35 
   2  -4  12   74.13    4.65 
  -2  -4 -12   72.40    4.56 
   2  -4  13   13.42    2.41 
   2  -4  13    9.57    2.18 
  -2  -4 -13    7.18    3.58 
   2  -4  13   10.75    2.36 
  -2  -4 -13    8.52    3.10 
   2  -4  13    8.85    1.53 
   2  -4  13    9.26    2.42 
  -2  -4 -13    7.95    2.34 
   2  -4  14    5.21    1.67 
  -2  -4 -14    1.15    2.78 
  -2  -4 -14    0.34    3.06 
  -2  -4 -14    4.57    2.79 
   2  -4  14    2.93    1.54 
  -2  -4 -14    3.31    1.85 
   2  -4  14    4.16    1.52 
  -2  -4 -14    2.57    2.32 
   2  -4  15    7.52    1.15 
  -2  -4 -15    7.98    2.07 
  -2  -4 -15    5.38    1.92 
  -2  -4 -15    6.56    2.12 
   2  -3 -17   11.13    2.52 
  -2  -3  17   14.67    1.39 
   2  -3 -16    7.21    3.15 
  -2  -3  16   14.84    2.08 
   2  -3 -16   11.73    3.40 
   2  -3 -16   11.84    2.54 
   2  -3 -16   15.79    3.02 
  -2  -3  15   10.88    2.57 
   2  -3 -15    8.17    3.24 
   2  -3 -15    6.66    3.54 
   2  -3 -15    7.33    2.73 
   2  -3 -14   64.24    4.65 
   2  -3 -14   60.03    4.91 
   2  -3 -14   60.66    5.51 
  -2  -3  14   66.72    3.77 
  -2  -3  14   67.10    4.59 
  -2  -3  14   60.55    3.58 
  -2  -3  13  114.27    6.31 
   2  -3 -13  113.68    6.58 
  -2  -3  13  107.34    5.48 
  -2  -3  13  110.86    5.65 
   2  -3 -13  107.35    6.17 
  -2  -3  13  114.31    6.54 
  -2  -3  13   99.06    5.29 
   2  -3 -12   52.06    4.11 
   2  -3 -12   59.39    4.78 
  -2  -3  12   54.80    3.71 
  -2  -3  12   56.58    3.65 
  -2  -3  12   62.43    4.52 
  -2  -3  12   56.13    3.96 
  -2  -3  12   62.00    4.76 
  -2  -3  12   55.56    4.83 
  -2  -3  11  340.98   14.24 
  -2  -3  11  333.24   14.73 
   2  -3 -11  322.66   14.40 
  -2  -3  11  325.36   14.46 
  -2  -3  11  349.40   15.00 
  -2  -3  11  336.56   14.98 
   2  -3 -10  272.01   12.09 
  -2  -3  10  280.68   12.74 
  -2  -3  10  266.27   12.34 
  -2  -3  10  304.93   12.79 
  -2  -3  10  279.63   12.74 
  -2  -3   9   60.38    4.45 
  -2  -3   9   52.74    4.64 
  -2  -3   9   61.38    4.24 
   2  -3  -9   54.06    3.56 
  -2  -3   9   64.61    4.64 
  -2  -3   8  225.46   10.54 
  -2  -3   8  219.15   10.42 
   2  -3  -8  227.89    9.74 
  -2  -3   8  232.91   10.55 
  -2  -3   8  229.06   10.63 
  -2  -3   7  269.48   12.21 
  -2  -3   6  262.51   12.22 
  -2  -3   6  278.68   11.74 
   2  -3  -6  280.29   13.35 
  -2  -3   6  274.81   12.09 
  -2  -3   5  461.78   20.90 
  -2  -3   5  458.81   18.99 
   2  -3  -5  470.46   20.24 
  -2  -3   5  445.76   19.21 
  -2  -3   5  457.18   19.04 
  -2  -3   5  470.09   20.77 
   2  -3  -5  524.12   21.66 
  -2  -3   4   24.26    2.58 
  -2  -3   4   23.77    3.54 
   2  -3  -4   27.30    2.67 
   2  -3  -4   28.80    3.49 
  -2  -3   4   30.36    2.54 
  -2  -3   4   28.09    3.25 
  -2  -3   4   25.08    2.72 
   2  -3  -4   26.59    3.77 
  -2  -3   4   34.49    4.74 
   2  -3  -3  257.26   12.25 
  -2  -3   3  252.27   11.90 
   2  -3  -3  234.46   10.83 
  -2  -3   3  243.35   10.45 
  -2  -3   3  244.02   10.45 
  -2  -3   3  254.93   12.33 
   2  -3  -3  219.54   11.94 
   2  -3  -2  588.08   26.37 
   2  -3  -2  585.65   25.04 
  -2  -3   2  653.80   26.45 
   2  -3  -2  658.87   25.30 
  -2  -3   2  604.02   24.92 
  -2  -3   2  632.64   24.98 
   2  -3  -2  630.43   26.66 
  -2  -3   1  196.36    9.05 
   2  -3  -1  169.59    7.47 
  -2  -3   1  193.30    7.64 
   2  -3  -1  201.34    8.01 
   2  -3  -1  156.61    7.22 
  -2  -3   1  198.19    7.89 
   2  -3  -1  148.10    7.47 
   2  -3  -1  199.43    9.51 
   2  -3   0  273.75   12.78 
  -2  -3   0  267.50   10.96 
   2  -3   0  246.44   11.29 
  -2  -3   0  263.29   12.12 
  -2  -3   0  257.30   13.01 
  -2  -3  -1    3.70    1.57 
  -2  -3  -1    4.74    1.46 
   2  -3   1    3.60    1.48 
  -2  -3  -1    2.69    1.77 
  -2  -3  -1    3.79    2.57 
  -2  -3  -2  826.61   33.92 
  -2  -3  -2  836.12   35.44 
   2  -3   2  800.12   33.53 
   2  -3   2  857.76   35.24 
   2  -3   2  817.45   33.96 
  -2  -3  -2  847.87   33.05 
  -2  -3  -3  534.94   21.43 
  -2  -3  -3  545.00   21.61 
  -2  -3  -3  528.21   23.88 
   2  -3   3  504.21   22.57 
   2  -3   3  531.80   23.80 
   2  -3   4  244.70   11.05 
  -2  -3  -4  261.00   10.89 
   2  -3   4  248.50   13.07 
  -2  -3  -4  268.57   11.08 
  -2  -3  -4  261.28   13.36 
   2  -3   4  245.98   12.06 
  -2  -3  -5  294.64   11.93 
   2  -3   5  264.62   12.13 
   2  -3   5  279.94   12.33 
  -2  -3  -5  300.03   12.19 
   2  -3   6   11.96    2.28 
   2  -3   6   13.91    2.50 
  -2  -3  -6   14.36    2.19 
  -2  -3  -6   14.25    2.50 
  -2  -3  -7   96.21    4.97 
   2  -3   7   81.69    5.39 
  -2  -3  -7   85.33    5.26 
  -2  -3  -7   87.94    4.63 
   2  -3   7   91.64    5.24 
   2  -3   7   89.97    5.14 
  -2  -3  -8   54.92    3.86 
  -2  -3  -8   56.38    3.60 
  -2  -3  -8   52.61    4.51 
   2  -3   8   51.40    4.13 
   2  -3   8   46.32    4.21 
   2  -3   8   54.53    4.09 
   2  -3   9  308.41   14.18 
  -2  -3  -9  328.69   14.26 
  -2  -3  -9  328.20   14.53 
   2  -3   9  332.55   14.37 
   2  -3   9  337.50   14.63 
  -2  -3  -9  311.76   13.92 
   2  -3  10  349.06   15.58 
  -2  -3 -10  364.77   16.10 
  -2  -3 -10  367.22   15.77 
   2  -3  10  361.34   15.55 
   2  -3  10  357.83   15.91 
  -2  -3 -10  346.83   15.35 
   2  -3  11   67.92    5.05 
  -2  -3 -11   70.65    5.64 
   2  -3  11   67.76    4.69 
   2  -3  11   64.55    4.88 
   2  -3  11   74.40    4.91 
  -2  -3 -11   72.96    4.74 
  -2  -3 -11   62.27    6.11 
   2  -3  11   72.25    4.89 
  -2  -3 -12  176.15    9.58 
   2  -3  12  177.65    8.53 
  -2  -3 -12  180.32    8.70 
   2  -3  12  176.38    8.61 
  -2  -3 -12  163.55    9.46 
   2  -3  12  173.57    8.54 
   2  -3  12  174.30    8.97 
   2  -3  12  174.99    8.58 
  -2  -3 -13  203.40   10.28 
   2  -3  13  185.55    8.62 
   2  -3  13  192.63    9.15 
   2  -3  13  203.69    9.29 
  -2  -3 -13  199.67    9.89 
  -2  -3 -13  208.06    9.47 
   2  -3  13  198.35    9.18 
   2  -3  14    1.65    2.27 
  -2  -3 -14   -0.72    3.73 
  -2  -3 -14    5.89    3.46 
   2  -3  14    3.92    2.11 
  -2  -3 -14    5.95    3.41 
   2  -3  14    2.53    2.11 
  -2  -3 -14    3.37    2.61 
  -2  -3 -15   36.87    3.53 
  -2  -3 -15   44.99    4.09 
   2  -3  15   40.32    2.72 
  -2  -3 -15   44.11    3.88 
   2  -3  15   47.05    2.94 
  -2  -3 -15   40.95    3.29 
   2  -3  16   43.49    2.51 
  -2  -3 -16   52.51    3.50 
  -2  -3 -16   49.30    3.31 
  -2  -3 -16   39.02    3.17 
   2  -2 -18   12.14    2.30 
  -2  -2  18   12.54    1.30 
   2  -2 -18   10.57    1.87 
   2  -2 -18   10.01    2.13 
  -2  -2  17   13.49    1.92 
   2  -2 -17    9.39    2.98 
   2  -2 -17   13.21    3.13 
   2  -2 -16  144.34    7.56 
   2  -2 -16  139.61    7.68 
  -2  -2  16  134.92    6.54 
  -2  -2  16  132.25    6.08 
  -2  -2  15    6.68    2.68 
  -2  -2  15    2.88    1.83 
   2  -2 -15    3.00    3.34 
  -2  -2  14   24.66    2.69 
  -2  -2  14   23.90    3.30 
   2  -2 -14   21.11    3.90 
   2  -2 -14   21.75    3.42 
  -2  -2  14   23.06    2.24 
   2  -2 -14   26.66    4.53 
  -2  -2  13   17.68    3.18 
   2  -2 -13   18.63    3.87 
   2  -2 -13   15.13    3.03 
  -2  -2  13   16.71    2.04 
   2  -2 -13    8.68    3.36 
  -2  -2  13   14.40    2.13 
  -2  -2  13   17.81    2.62 
  -2  -2  12   12.97    3.17 
   2  -2 -12   16.99    2.94 
   2  -2 -12   15.66    3.20 
  -2  -2  12   18.03    2.75 
  -2  -2  12   19.90    2.48 
  -2  -2  12   20.82    3.20 
  -2  -2  12   20.53    2.32 
  -2  -2  11  305.80   12.97 
  -2  -2  11  328.32   13.67 
  -2  -2  11  291.47   12.98 
  -2  -2  11  306.64   13.43 
   2  -2 -11  304.98   13.43 
  -2  -2  11  318.00   13.65 
  -2  -2  11  295.27   13.19 
   2  -2 -11  309.12   13.17 
  -2  -2  10   89.44    4.97 
  -2  -2  10   75.25    4.74 
  -2  -2  10   89.96    5.30 
  -2  -2  10   94.97    5.38 
   2  -2 -10   84.44    4.52 
  -2  -2  10   85.37    4.55 
  -2  -2   9  160.47    7.25 
  -2  -2   9  163.23    7.60 
  -2  -2   9  163.20    7.80 
  -2  -2   9  153.84    7.48 
  -2  -2   9  162.46    7.75 
  -2  -2   8   14.10    2.27 
  -2  -2   8   16.51    2.17 
  -2  -2   8   15.60    2.31 
   2  -2  -8   12.34    2.80 
  -2  -2   8   14.11    2.27 
  -2  -2   7  131.13    6.33 
   2  -2  -7  124.97    8.52 
  -2  -2   7  123.23    6.22 
  -2  -2   7  140.17    7.38 
  -2  -2   7  126.75    6.29 
   2  -2  -7  154.09    8.56 
   2  -2  -7  141.26    7.59 
  -2  -2   7  133.63    6.40 
  -2  -2   6  472.95   20.30 
   2  -2  -6  433.06   19.90 
   2  -2  -6  506.46   21.09 
  -2  -2   5  571.18   23.60 
  -2  -2   5  594.99   24.83 
  -2  -2   5  568.16   24.84 
   2  -2  -5  645.05   25.33 
   2  -2  -5  581.17   24.28 
   2  -2  -4 2456.74   95.06 
   2  -2  -4 2595.09   94.72 
   2  -2  -4 2693.89   93.92 
  -2  -2   4 2574.26   94.87 
  -2  -2   4 2753.41   94.73 
   2  -2  -3  342.82   14.65 
   2  -2  -3  299.38   14.84 
  -2  -2   3  332.10   15.05 
  -2  -2   3  343.25   14.67 
  -2  -2   3  316.60   15.38 
   2  -2  -3  339.40   13.76 
   2  -2  -2 1084.09   42.20 
   2  -2  -2 1086.50   43.29 
  -2  -2   2 1097.16   43.33 
  -2  -2   2 1058.82   43.96 
   2  -2  -2 1015.25   43.33 
   2  -2  -1  925.40   39.06 
   2  -2  -1 1038.85   39.92 
  -2  -2   1 1072.13   40.00 
   2  -2  -1  993.38   39.85 
  -2  -2   0 1115.55   43.44 
   2  -2   0 1006.11   41.89 
   2  -2   0 1101.03   42.74 
  -2  -2   0 1150.34   43.05 
   2  -2   0 1099.12   42.94 
   2  -2   0 1097.82   42.62 
  -2  -2  -1  339.68   14.01 
   2  -2   1  313.74   13.60 
   2  -2   1  316.84   13.18 
   2  -2   1  321.78   13.51 
  -2  -2  -1  331.31   14.43 
  -2  -2  -2  981.98   39.51 
   2  -2   2  982.98   38.96 
  -2  -2  -2  990.86   40.04 
   2  -2   2  987.19   38.77 
   2  -2   2  950.41   39.77 
   2  -2   3   71.49    3.77 
   2  -2   3   66.25    3.16 
  -2  -2  -3   68.16    4.63 
  -2  -2  -3   65.87    3.61 
   2  -2   3   65.51    4.73 
  -2  -2  -3   69.26    4.72 
  -2  -2  -4    6.56    1.45 
   2  -2   4    6.58    1.43 
   2  -2   4    6.90    1.08 
  -2  -2  -4    7.16    2.37 
  -2  -2  -4    6.40    1.48 
  -2  -2  -4    5.08    2.31 
  -2  -2  -4    9.20    1.79 
  -2  -2  -5  370.86   17.72 
  -2  -2  -5  395.12   15.81 
   2  -2   5  380.55   16.64 
  -2  -2  -5  412.11   15.96 
  -2  -2  -5  378.10   17.61 
  -2  -2  -5  395.21   16.80 
   2  -2   5  388.68   16.17 
  -2  -2  -5  389.72   16.75 
   2  -2   5  365.80   15.91 
  -2  -2  -6  713.45   31.29 
  -2  -2  -6  749.79   29.03 
  -2  -2  -6  716.76   28.88 
   2  -2   6  683.81   28.97 
   2  -2   6  726.04   29.44 
  -2  -2  -6  725.69   31.05 
  -2  -2  -6  729.99   30.18 
  -2  -2  -6  724.40   30.05 
   2  -2   6  706.27   28.98 
  -2  -2  -6  744.19   28.84 
  -2  -2  -7   31.48    2.64 
  -2  -2  -7   33.79    3.30 
  -2  -2  -7   30.17    3.41 
   2  -2   7   30.45    2.69 
  -2  -2  -7   30.33    2.71 
   2  -2   7   27.47    2.72 
   2  -2   7   34.68    2.89 
  -2  -2  -7   34.30    2.95 
  -2  -2  -8  238.38   10.53 
   2  -2   8  237.98   10.58 
   2  -2   8  237.94   10.72 
   2  -2   8  239.61   10.61 
  -2  -2  -8  240.30   10.65 
   2  -2   9  119.77    6.42 
  -2  -2  -9  125.37    6.56 
  -2  -2  -9  124.77    6.69 
   2  -2   9  123.77    6.79 
   2  -2   9  128.01    6.47 
  -2  -2 -10   41.22    4.30 
   2  -2  10   36.43    3.70 
   2  -2  10   34.93    3.53 
   2  -2  10   40.58    3.93 
  -2  -2 -10   35.45    4.47 
  -2  -2 -10   40.72    4.02 
   2  -2  10   36.48    3.78 
   2  -2  10   43.31    4.03 
   2  -2  11   74.29    5.08 
   2  -2  11   81.53    4.35 
   2  -2  11   76.57    4.92 
  -2  -2 -11   79.01    5.90 
   2  -2  11   67.03    4.94 
  -2  -2 -11   74.11    5.75 
   2  -2  11   81.24    5.10 
  -2  -2 -11   67.46    5.46 
   2  -2  11   78.01    5.12 
   2  -2  12   20.82    3.18 
  -2  -2 -12   24.96    4.11 
  -2  -2 -12   22.20    4.29 
  -2  -2 -12   23.30    4.28 
   2  -2  12   27.01    2.38 
   2  -2  12   30.71    3.44 
   2  -2  12   23.85    3.73 
   2  -2  12   27.19    2.67 
   2  -2  12   31.16    3.49 
  -2  -2 -12   24.78    4.41 
   2  -2  13   26.79    3.18 
  -2  -2 -13   19.40    4.41 
  -2  -2 -13   26.26    4.41 
   2  -2  13   31.53    3.33 
  -2  -2 -13   27.97    4.25 
   2  -2  13   19.79    2.93 
   2  -2  13   26.78    2.53 
  -2  -2 -14   90.96    6.04 
  -2  -2 -14   76.92    6.19 
  -2  -2 -14   81.53    5.74 
   2  -2  14   79.62    4.67 
   2  -2  14   78.64    4.64 
  -2  -2 -14   75.07    5.96 
   2  -2  14   69.71    3.90 
   2  -2  15   88.89    4.64 
  -2  -2 -15   87.64    6.13 
   2  -2  15   84.70    4.70 
  -2  -2 -15   84.33    5.83 
  -2  -2 -15   91.91    6.03 
  -2  -2 -15   81.62    5.50 
  -2  -2 -15   77.07    4.99 
  -2  -2 -16   35.91    3.50 
  -2  -2 -16   29.61    2.94 
   2  -2  16   28.50    2.23 
   2  -2  16   29.47    2.29 
  -2  -2 -16   32.72    3.97 
  -2  -2 -16   34.32    3.61 
  -2  -2 -17   17.05    2.27 
  -2  -2 -17   16.30    2.25 
  -2  -1  18    1.23    1.42 
   2  -1 -18    2.48    2.07 
  -2  -1  17   54.28    3.40 
   2  -1 -17   57.96    4.70 
   2  -1 -17   47.48    4.20 
  -2  -1  17   50.72    2.87 
   2  -1 -17   53.22    3.62 
   2  -1 -16   23.90    4.09 
   2  -1 -16   22.09    3.09 
  -2  -1  16   19.32    2.83 
  -2  -1  16   20.75    2.17 
  -2  -1  15  159.73    8.06 
   2  -1 -15  173.39    8.32 
   2  -1 -15  164.48    8.59 
   2  -1 -15  165.83    9.02 
   2  -1 -15  165.74    8.93 
  -2  -1  15  168.88    7.77 
   2  -1 -14   19.83    2.79 
  -2  -1  14   17.73    3.15 
  -2  -1  14   15.83    1.88 
   2  -1 -14   16.61    4.02 
   2  -1 -14   11.58    3.95 
   2  -1 -14   18.21    3.62 
   2  -1 -14   16.80    3.13 
  -2  -1  14   15.11    2.65 
  -2  -1  13  176.53    8.24 
   2  -1 -13  185.69    9.03 
  -2  -1  13  165.28    8.43 
  -2  -1  13  173.57    7.80 
   2  -1 -13  168.64    8.60 
   2  -1 -13  172.81    8.93 
   2  -1 -13  178.48    8.46 
   2  -1 -13  171.88    8.25 
   2  -1 -12  358.52   14.76 
  -2  -1  12  340.70   14.73 
  -2  -1  12  340.91   14.43 
   2  -1 -12  349.42   14.80 
   2  -1 -12  344.34   14.97 
  -2  -1  12  356.42   15.08 
   2  -1 -12  359.86   15.21 
  -2  -1  12  332.16   14.37 
   2  -1 -11   90.71    4.88 
   2  -1 -11   90.93    4.97 
  -2  -1  11   92.73    4.68 
  -2  -1  11   87.11    5.29 
   2  -1 -11   90.22    5.13 
  -2  -1  11   88.98    4.69 
  -2  -1  11   97.67    5.40 
  -2  -1  11   99.34    5.11 
  -2  -1  11   95.89    4.90 
  -2  -1  10  686.20   27.34 
  -2  -1  10  713.56   27.57 
  -2  -1  10  690.78   27.30 
   2  -1 -10  696.38   27.35 
  -2  -1  10  671.76   27.53 
   2  -1 -10  675.00   27.20 
  -2  -1  10  655.42   27.12 
  -2  -1  10  677.92   27.13 
   2  -1 -10  660.26   27.24 
  -2  -1  10  662.98   27.39 
  -2  -1   9  954.95   37.06 
   2  -1  -9  906.55   40.63 
  -2  -1   9  945.10   37.22 
  -2  -1   9  949.94   36.97 
  -2  -1   9  919.75   36.86 
   2  -1  -9  934.35   36.89 
  -2  -1   9  930.53   38.63 
  -2  -1   9  949.13   37.14 
  -2  -1   9  923.58   37.20 
  -2  -1   9  920.81   37.07 
   2  -1  -9  908.48   36.84 
  -2  -1   9  917.63   36.84 
  -2  -1   8  147.16    6.65 
   2  -1  -8  142.65    6.21 
   2  -1  -8  140.91    9.11 
  -2  -1   8  145.32    6.50 
  -2  -1   8  150.35    7.80 
  -2  -1   8  139.23    6.59 
  -2  -1   8  147.32    7.69 
  -2  -1   8  143.97    6.53 
   2  -1  -8  139.37    6.23 
  -2  -1   8  150.44    7.77 
   2  -1  -8  135.24    7.36 
  -2  -1   8  137.45    6.49 
  -2  -1   7   86.08    4.34 
  -2  -1   7   89.63    5.45 
  -2  -1   7   88.50    5.31 
   2  -1  -7   85.21    4.94 
  -2  -1   7   90.35    4.30 
  -2  -1   7   89.56    4.37 
  -2  -1   7   87.43    5.23 
  -2  -1   7   87.46    4.32 
   2  -1  -7   77.01    6.28 
   2  -1  -6  480.54   20.74 
   2  -1  -6  478.21   22.05 
  -2  -1   6  514.98   21.38 
   2  -1  -6  506.54   21.30 
  -2  -1   6  533.67   21.31 
   2  -1  -5  324.33   14.22 
   2  -1  -5  313.42   13.77 
  -2  -1   5  357.17   14.49 
   2  -1  -5  323.16   14.98 
  -2  -1   5  339.68   14.55 
  -2  -1   4 1280.40   51.06 
   2  -1  -4 1257.29   50.25 
  -2  -1   4 1317.17   50.88 
   2  -1  -4 1262.21   50.58 
   2  -1  -3 2214.97   92.54 
   2  -1  -3 2297.73   91.94 
   2  -1  -3 2382.59   92.12 
  -2  -1   3 2524.10   92.69 
   2  -1  -3 2354.21   91.48 
  -2  -1   3 2319.27   92.87 
   2  -1  -2 4423.65  174.41 
   2  -1  -2 4519.17  174.97 
  -2  -1   2 4783.18  175.34 
   2  -1  -2 4486.80  174.35 
  -2  -1   2 4368.78  175.10 
   2  -1  -2 4397.38  174.23 
   2  -1  -2 4581.19  174.65 
   2  -1  -2 4459.94  174.59 
   2  -1  -1  808.68   32.26 
   2  -1  -1  786.16   32.20 
   2  -1  -1  867.80   32.66 
   2  -1  -1  815.21   32.10 
   2  -1  -1  796.40   32.24 
   2  -1  -1  831.18   32.13 
  -2  -1   1  810.83   32.69 
  -2  -1   0 1110.22   42.09 
  -2  -1   0  976.23   42.11 
   2  -1   0 1018.17   41.60 
   2  -1   0 1063.98   41.90 
   2  -1   0 1128.14   41.84 
  -2  -1  -1  232.09    9.96 
   2  -1   1  219.19    9.23 
   2  -1   1  240.86    9.21 
   2  -1   1  204.18    9.27 
   2  -1   1  230.35    9.85 
  -2  -1  -1  235.18    9.85 
  -2  -1  -1  241.41    9.79 
   2  -1   1  208.60    9.43 
  -2  -1  -2 2097.57   80.71 
  -2  -1  -2 2034.95   81.01 
  -2  -1  -2 2015.55   80.75 
  -2  -1  -2 2102.02   80.94 
  -2  -1  -2 2075.55   80.57 
   2  -1   2 2039.95   80.77 
   2  -1   2 2033.04   80.47 
   2  -1   2 2041.25   80.23 
  -2  -1  -3   14.46    2.09 
  -2  -1  -3   15.70    1.95 
  -2  -1  -3   17.24    2.29 
   2  -1   3   16.74    1.81 
   2  -1   3   15.90    1.54 
   2  -1   4 1406.26   53.96 
  -2  -1  -4 1319.67   54.48 
   2  -1   4 1380.37   54.20 
  -2  -1  -4 1330.93   54.38 
  -2  -1  -5  348.36   14.71 
   2  -1   5  347.92   14.22 
   2  -1   5  352.51   14.00 
  -2  -1  -5  344.15   14.70 
  -2  -1  -5  272.01   14.60 
  -2  -1  -5  284.84   14.73 
  -2  -1  -6 1989.24   78.26 
  -2  -1  -6 2013.27   78.30 
   2  -1   6 2126.05   79.08 
   2  -1   6 2099.48   79.28 
  -2  -1  -6 1991.23   79.82 
   2  -1   6 1943.68   78.27 
  -2  -1  -6 1978.49   79.82 
   2  -1   6 2033.02   78.40 
  -2  -1  -6 1928.34   80.13 
   2  -1   6 1941.17   78.28 
   2  -1   7  238.60   10.82 
   2  -1   7  232.11    9.81 
  -2  -1  -7  240.42   11.54 
  -2  -1  -7  202.29   11.64 
  -2  -1  -7  240.09    9.88 
  -2  -1  -7  224.19    9.85 
   2  -1   7  216.15   10.17 
  -2  -1  -7  224.91    9.63 
  -2  -1  -7  223.75   11.49 
   2  -1   7  232.27    9.94 
  -2  -1  -7  226.75   11.52 
   2  -1   7  228.04    9.83 
  -2  -1  -8  120.37    5.62 
   2  -1   8  110.84    5.57 
  -2  -1  -8   98.96    6.93 
   2  -1   8  106.61    5.54 
  -2  -1  -8   97.98    6.98 
   2  -1   8  100.29    5.70 
  -2  -1  -8  113.33    7.18 
   2  -1   8  109.02    5.41 
  -2  -1  -8  109.39    5.27 
   2  -1   8  106.62    5.35 
   2  -1   8  103.68    6.09 
   2  -1   8  115.58    5.42 
   2  -1   9   34.38    3.05 
   2  -1   9   35.86    2.70 
  -2  -1  -9   38.25    3.23 
  -2  -1  -9   37.52    3.36 
   2  -1   9   43.70    3.19 
   2  -1   9   37.15    3.23 
  -2  -1  -9   37.13    3.02 
   2  -1   9   44.10    3.08 
   2  -1   9   35.10    3.13 
  -2  -1 -10  162.44    8.10 
   2  -1  10  161.83    7.30 
   2  -1  10  165.59    7.74 
  -2  -1 -10  158.75    8.05 
   2  -1  10  160.46    7.93 
  -2  -1 -10  162.40    7.65 
   2  -1  10  152.50    7.62 
   2  -1  10  154.42    7.40 
   2  -1  10  166.49    7.74 
  -2  -1 -11   93.19    5.31 
   2  -1  11   91.49    4.74 
  -2  -1 -11   83.28    5.89 
   2  -1  11   82.91    5.30 
   2  -1  11   93.22    5.43 
   2  -1  11   96.76    5.30 
  -2  -1 -11   90.28    5.97 
   2  -1  11   89.84    4.91 
   2  -1  12   42.22    3.13 
   2  -1  12   40.72    3.86 
  -2  -1 -12   44.80    4.81 
   2  -1  12   38.79    3.77 
  -2  -1 -12   44.89    3.76 
   2  -1  12   40.23    3.75 
  -2  -1 -12   47.23    5.05 
   2  -1  12   49.09    3.16 
  -2  -1 -12   51.88    4.63 
  -2  -1 -13    1.30    3.96 
   2  -1  13    0.58    1.82 
  -2  -1 -13    2.45    3.10 
  -2  -1 -13    3.62    2.76 
  -2  -1 -13    3.67    3.74 
   2  -1  13    3.22    2.57 
   2  -1  13    3.85    2.53 
   2  -1  13    1.98    1.77 
   2  -1  14    5.74    2.40 
   2  -1  14    8.76    1.81 
  -2  -1 -14    9.04    2.90 
   2  -1  14    9.82    1.62 
  -2  -1 -14    9.75    3.64 
   2  -1  14    4.95    2.47 
  -2  -1 -14    8.78    4.63 
  -2  -1 -14    5.15    3.04 
  -2  -1 -15   62.07    4.40 
  -2  -1 -15   74.90    5.86 
   2  -1  15   70.12    4.17 
  -2  -1 -15   66.28    4.49 
   2  -1  15   70.41    4.26 
  -2  -1 -15   69.67    5.01 
  -2  -1 -16   51.39    4.70 
   2  -1  16   49.88    3.14 
  -2  -1 -16   47.97    3.93 
   2  -1  16   48.43    3.12 
   2  -1  17   10.87    1.34 
  -2  -1 -17    8.02    2.04 
   2   0 -19    4.75    1.69 
  -2   0  19    6.36    0.98 
   2   0 -18  171.61    8.29 
   2   0 -18  155.45    7.95 
  -2   0  18  185.95    7.64 
   2   0 -18  176.59    8.05 
   2   0 -17   36.36    3.79 
   2   0 -17   38.48    3.34 
  -2   0  17   42.41    3.14 
   2   0 -17   40.17    3.85 
   2   0 -17   48.76    4.42 
  -2   0  17   38.54    2.59 
  -2   0  16  107.46    5.66 
   2   0 -16   98.39    6.58 
   2   0 -16   96.40    5.95 
   2   0 -16   99.96    6.23 
  -2   0  16  111.20    5.37 
   2   0 -16  106.90    6.47 
   2   0 -15   41.40    4.53 
   2   0 -15   33.48    3.96 
  -2   0  15   35.69    3.06 
  -2   0  15   33.00    3.36 
   2   0 -15   37.81    4.20 
   2   0 -15   29.75    4.09 
  -2   0  14  253.83   11.43 
   2   0 -14  246.22   11.72 
   2   0 -14  237.53   11.61 
   2   0 -14  255.47   11.70 
  -2   0  14  264.26   11.18 
   2   0 -14  248.14   11.96 
  -2   0  13   54.30    4.18 
   2   0 -13   56.75    4.65 
   2   0 -13   47.88    4.08 
  -2   0  13   45.81    3.02 
  -2   0  13   54.94    4.00 
  -2   0  13   46.61    3.81 
   2   0 -13   54.50    4.43 
   2   0 -13   53.41    4.13 
  -2   0  12  204.34    9.48 
   2   0 -12  202.71    9.57 
  -2   0  12  201.27    8.84 
   2   0 -12  199.53    9.06 
  -2   0  12  204.29    9.29 
  -2   0  12  209.28    8.93 
  -2   0  12  203.59    9.42 
   2   0 -12  208.11    9.48 
   2   0 -11  121.55    5.98 
  -2   0  11  117.51    5.50 
  -2   0  11  117.53    6.03 
  -2   0  11  109.92    5.41 
  -2   0  11  112.22    5.97 
   2   0 -11  117.81    5.91 
  -2   0  11  119.40    5.94 
   2   0 -11  117.91    5.57 
   2   0 -10  339.27   14.09 
   2   0 -10  333.86   14.06 
  -2   0  10  341.39   14.22 
  -2   0  10  280.53   14.10 
  -2   0  10  346.68   13.86 
   2   0 -10  322.98   18.04 
  -2   0  10  336.53   13.80 
  -2   0  10  349.71   13.78 
   2   0 -10  336.70   13.86 
  -2   0  10  348.80   14.16 
   2   0  -9  156.67   10.68 
  -2   0   9  159.99    8.27 
   2   0  -9  156.50    8.85 
  -2   0   9  173.28    7.15 
  -2   0   9  162.76    7.53 
   2   0  -9  158.42    7.31 
   2   0  -9  165.12    7.35 
   2   0  -9  166.96    7.16 
  -2   0   9  164.98    7.12 
  -2   0   9  166.87    7.49 
  -2   0   9  164.84    7.43 
  -2   0   9  171.82    7.50 
   2   0  -8   80.95    4.04 
  -2   0   8   81.71    4.20 
   2   0  -8   69.42    5.04 
  -2   0   8   86.41    4.92 
  -2   0   8   84.71    4.17 
   2   0  -8   81.38    4.04 
   2   0  -8   87.88    7.16 
  -2   0   8   86.23    4.25 
  -2   0   8   84.87    4.19 
  -2   0   7 1130.19   46.73 
   2   0  -7 1249.39   49.38 
   2   0  -7 1217.95   48.02 
  -2   0   7 1284.32   47.75 
   2   0  -6  876.18   38.33 
   2   0  -6  950.59   39.51 
  -2   0   6  991.13   38.82 
  -2   0   6  994.10   38.27 
  -2   0   5   12.41    2.52 
   2   0  -5   10.62    3.05 
  -2   0   5   11.21    1.82 
   2   0  -5    9.83    2.10 
   2   0  -5   12.17    2.09 
  -2   0   4  127.90    6.40 
   2   0  -4  121.90    6.83 
  -2   0   4  111.48    6.00 
   2   0  -4  116.88    6.05 
  -2   0   4  127.36    5.87 
   2   0  -3   19.70    2.00 
  -2   0   3   15.51    1.97 
   2   0  -2 2138.10   81.82 
   2   0  -2 1951.01   81.87 
   2   0  -2 2041.19   82.03 
  -2   0   2 2218.27   81.91 
  -2   0   1 4254.49  165.33 
   2   0  -1 3937.98  165.24 
   2   0  -1 4353.45  165.08 
   2   0  -1 4338.92  165.50 
  -2   0   1 4326.96  165.43 
  -2   0   0  202.42    8.51 
  -2   0   0  196.55    9.07 
  -2   0   0  205.13    9.18 
  -2   0   0  191.70    8.97 
   2   0   1  137.53    5.93 
   2   0   1  117.21    5.88 
  -2   0  -1  125.49    5.21 
   2   0   1  129.24    5.81 
   2   0   2 2305.37   89.49 
  -2   0  -2 2222.66   89.34 
   2   0   2 2236.80   89.23 
  -2   0  -2 2155.99   89.38 
   2   0   2 2392.38   89.29 
   2   0   2 2342.74   89.31 
  -2   0  -3 7288.09  284.55 
   2   0   3 7307.28  284.61 
  -2   0  -3 6920.11  284.50 
   2   0   3 7633.09  284.34 
  -2   0  -3 6871.90  284.57 
   2   0   3 7654.04  284.37 
  -2   0  -4  317.52   13.86 
   2   0   4  309.67   13.26 
  -2   0  -4  307.58   13.67 
  -2   0  -4  317.49   13.74 
  -2   0  -5 1708.93   69.03 
   2   0   5 1784.33   68.55 
   2   0   5 1754.05   68.48 
  -2   0  -5 1692.89   69.09 
  -2   0  -5 1776.36   69.07 
  -2   0  -5 1672.85   68.31 
  -2   0  -6   14.41    2.16 
   2   0   6   19.94    2.19 
   2   0   6   18.95    2.14 
   2   0   6   14.09    1.85 
  -2   0  -6   13.45    2.82 
  -2   0  -6   19.17    2.91 
  -2   0  -6   14.41    1.73 
  -2   0  -6   18.12    2.96 
  -2   0  -7    1.42    1.59 
  -2   0  -7    3.33    1.94 
   2   0   7    2.54    1.43 
  -2   0  -7    5.46    2.63 
   2   0   7    1.23    1.56 
  -2   0  -7    4.77    1.78 
   2   0   7    2.97    1.54 
   2   0   7    4.84    1.60 
   2   0   7    0.47    1.69 
  -2   0  -7    2.20    2.38 
  -2   0  -7    3.36    1.59 
   2   0   7    4.81    1.59 
  -2   0  -7    0.47    2.14 
   2   0   7    7.77    1.45 
  -2   0  -8    3.73    1.88 
   2   0   8    3.77    1.63 
  -2   0  -8    7.14    2.93 
   2   0   8    4.28    1.70 
   2   0   8    4.53    1.40 
   2   0   8    7.48    1.94 
   2   0   8    4.54    1.57 
  -2   0  -8    4.47    2.15 
  -2   0  -8   12.74    4.89 
   2   0   8    3.40    1.59 
   2   0   8    2.83    1.90 
  -2   0  -8    3.43    1.87 
  -2   0  -8    0.28    2.42 
  -2   0  -8    1.15    2.41 
   2   0   8    3.87    1.61 
   2   0   9  840.86   33.15 
   2   0   9  829.06   33.00 
   2   0   9  808.47   33.14 
   2   0   9  815.21   32.88 
  -2   0  -9  839.92   33.24 
  -2   0  -9  832.50   33.39 
   2   0   9  803.29   33.17 
  -2   0  -9  834.01   33.22 
  -2   0  -9  846.39   33.36 
  -2   0 -10   85.64    5.26 
   2   0  10   85.40    4.41 
   2   0  10   83.24    4.91 
  -2   0 -10   80.95    5.24 
  -2   0 -10   85.23    4.97 
   2   0  10   85.87    4.73 
   2   0  10   75.57    4.34 
  -2   0 -10   80.08    4.79 
  -2   0 -11  132.58    7.36 
   2   0  11  131.87    6.37 
  -2   0 -11  136.80    7.48 
   2   0  11  125.48    6.69 
  -2   0 -11  139.29    7.24 
   2   0  11  147.66    7.01 
  -2   0 -11  126.49    7.03 
   2   0  11  135.66    6.36 
  -2   0 -12   74.87    5.90 
  -2   0 -12   75.47    5.40 
   2   0  12   77.76    4.67 
  -2   0 -12   69.91    5.03 
   2   0  12   77.98    4.84 
   2   0  12   74.73    4.19 
  -2   0 -12   62.33    5.65 
   2   0  12   69.67    4.11 
   2   0  13    1.02    1.63 
   2   0  13   -0.42    2.27 
  -2   0 -13    1.62    2.91 
  -2   0 -13   -1.00    3.30 
  -2   0 -13    2.09    4.04 
   2   0  13   -0.16    1.60 
   2   0  13   -0.11    2.54 
   2   0  14   -0.50    2.33 
  -2   0 -14    3.15    2.81 
  -2   0 -14   -5.68    4.01 
   2   0  14   -0.42    1.37 
   2   0  14    0.96    1.68 
   2   0  14    0.72    2.44 
  -2   0 -14    3.42    3.51 
  -2   0 -14    0.16    4.20 
   2   0  15    5.69    1.59 
  -2   0 -15    8.70    3.30 
   2   0  15    4.22    2.21 
  -2   0 -15    6.73    3.68 
   2   0  15    5.37    2.14 
  -2   0 -15    5.72    2.63 
  -2   0 -15    4.10    3.93 
  -2   0 -16    4.77    3.17 
  -2   0 -16    9.50    3.73 
   2   0  16    8.33    1.87 
  -2   0 -16    6.06    2.85 
  -2   0 -17    6.39    2.68 
  -2   0 -17    4.65    2.48 
   2   0  17    4.46    1.28 
  -2   0 -18   87.90    4.41 
   2   1 -19   18.16    1.84 
   2   1 -18    1.06    2.04 
  -2   1  18    1.15    1.45 
   2   1 -18   -0.36    2.43 
  -2   1  18    2.55    1.20 
   2   1 -17   59.05    4.47 
   2   1 -17   48.66    4.22 
  -2   1  17   55.26    3.54 
  -2   1  16   19.59    2.34 
   2   1 -16   17.52    3.59 
  -2   1  16   22.17    2.81 
   2   1 -16   19.08    3.91 
   2   1 -15  169.26    8.86 
   2   1 -15  168.04    9.00 
   2   1 -15  166.13    8.48 
  -2   1  15  184.83    8.40 
  -2   1  15  174.58    8.11 
   2   1 -15  169.74    8.97 
  -2   1  14   13.89    2.61 
   2   1 -14   18.06    4.20 
  -2   1  14   15.76    2.93 
  -2   1  14   13.87    1.77 
   2   1 -14   15.83    3.08 
   2   1 -14   10.42    3.40 
   2   1 -14    9.62    3.65 
   2   1 -14   16.37    4.09 
   2   1 -13  178.15    8.74 
   2   1 -13  172.29    8.50 
   2   1 -13  160.23    8.83 
  -2   1  13  177.64    8.82 
  -2   1  13  184.43    8.54 
   2   1 -13  167.04    8.87 
   2   1 -13  167.10    8.03 
  -2   1  13  181.16    8.39 
  -2   1  13  179.62    7.81 
   2   1 -12  342.65   14.79 
   2   1 -12  331.23   14.42 
   2   1 -12  327.68   14.65 
   2   1 -12  355.27   14.93 
   2   1 -12  320.53   14.84 
  -2   1  12  340.71   14.99 
  -2   1  12  341.68   14.21 
  -2   1  12  315.66   14.64 
   2   1 -12  352.40   14.66 
  -2   1  12  386.08   14.70 
  -2   1  11   90.72    5.43 
   2   1 -11   95.45    5.00 
  -2   1  11   94.93    4.68 
   2   1 -11   93.40    5.37 
   2   1 -11   90.66    5.29 
   2   1 -11   85.52    4.80 
  -2   1  11   94.00    5.03 
  -2   1  10  719.88   28.00 
   2   1 -10  669.63   27.71 
  -2   1  10  678.71   27.46 
   2   1 -10  675.56   27.75 
  -2   1  10  706.22   27.71 
   2   1 -10  657.16   27.58 
  -2   1  10  702.03   27.44 
  -2   1   9  938.66   36.94 
   2   1  -9  814.94   38.69 
  -2   1   9  940.26   37.19 
  -2   1   9  926.74   36.75 
   2   1  -9  910.64   36.82 
   2   1  -9  919.02   36.91 
  -2   1   9  933.48   36.71 
  -2   1   9  956.12   36.77 
   2   1  -9  929.93   36.90 
  -2   1   8  141.40    7.68 
  -2   1   8  139.12    6.30 
   2   1  -8  158.06   10.41 
  -2   1   8  157.42    6.37 
  -2   1   8  143.73    6.73 
  -2   1   8  132.97    6.69 
   2   1  -8  143.10    6.44 
   2   1  -8  142.48    6.29 
  -2   1   8  149.25    6.54 
  -2   1   8  138.10    6.53 
   2   1  -8  130.86    7.88 
   2   1  -8  146.21    6.38 
   2   1  -7   79.08    5.18 
  -2   1   7   85.10    4.31 
   2   1  -7   82.90    3.97 
  -2   1   7   90.20    5.19 
   2   1  -7   83.78    3.92 
  -2   1   7   79.73    4.19 
  -2   1   7   86.98    4.00 
   2   1  -7   95.99    6.20 
  -2   1   6  536.10   21.12 
  -2   1   6  485.71   20.23 
   2   1  -6  494.59   21.22 
   2   1  -5  341.24   14.27 
   2   1  -5  309.31   14.05 
  -2   1   5  321.79   13.32 
  -2   1   5  356.57   14.10 
   2   1  -5  307.24   13.89 
   2   1  -4 1315.26   51.90 
  -2   1   4 1277.16   51.08 
  -2   1   4 1392.28   51.69 
   2   1  -4 1267.82   51.63 
   2   1  -4 1273.20   52.54 
   2   1  -3 2399.35   95.40 
  -2   1   3 2621.43   95.14 
  -2   1   3 2343.61   94.65 
   2   1  -2 4301.94  162.73 
   2   1  -2 4032.61  162.60 
   2   1  -1  736.03   31.18 
   2   1  -1  819.37   31.28 
   2   1   0 1190.89   42.61 
  -2   1   0 1055.40   42.49 
   2   1   0 1055.39   43.02 
  -2   1   0  972.21   42.61 
   2   1   0 1092.01   42.90 
   2   1   0 1080.37   43.04 
   2   1   0 1168.29   43.05 
   2   1   1  209.17   10.37 
   2   1   1  248.68   10.46 
   2   1   1  255.88    9.89 
   2   1   1  246.27   10.30 
  -2   1  -1  218.12    9.78 
   2   1   1  256.78   10.49 
   2   1   2 2099.53   80.66 
   2   1   2 2281.62   80.70 
   2   1   2 2204.25   80.67 
  -2   1  -2 2056.92   80.65 
  -2   1  -3   11.79    1.62 
   2   1   3   15.43    2.34 
  -2   1  -3   15.69    2.36 
   2   1   3   16.53    2.16 
   2   1   3   14.38    2.13 
  -2   1  -4 1321.74   54.12 
  -2   1  -4 1310.57   54.52 
  -2   1  -4 1499.71   54.98 
   2   1   4 1398.11   54.53 
  -2   1  -4 1342.78   54.27 
   2   1   5  349.95   14.87 
   2   1   5  335.66   14.90 
  -2   1  -5  327.25   15.46 
  -2   1  -5  348.46   14.85 
  -2   1  -5  358.33   15.57 
   2   1   5  336.55   14.54 
  -2   1  -5  335.08   14.92 
   2   1   6 1963.96   76.90 
   2   1   6 1914.60   76.82 
  -2   1  -6 2028.53   79.01 
   2   1   6 1921.08   77.99 
  -2   1  -6 1991.38   76.81 
   2   1   6 2059.98   77.70 
  -2   1  -6 1926.46   78.05 
  -2   1  -6 2037.20   79.16 
  -2   1  -6 1978.71   76.89 
   2   1   6 1880.11   77.90 
  -2   1  -6 1914.15   78.21 
  -2   1  -7  232.40    9.60 
  -2   1  -7  211.84   11.75 
  -2   1  -7  221.09    9.56 
  -2   1  -7  231.69    9.78 
  -2   1  -7  215.63    9.77 
   2   1   7  240.59    9.57 
  -2   1  -7  217.70   11.02 
   2   1   7  231.57    9.65 
  -2   1  -7  220.21    9.76 
   2   1   7  234.49    9.46 
   2   1   7  209.09    9.76 
   2   1   7  235.35   10.55 
  -2   1  -7  215.41   11.22 
  -2   1  -7  223.84    9.63 
  -2   1  -7  253.05   12.69 
   2   1   7  229.71    9.74 
   2   1   7  235.97   10.91 
   2   1   7  229.11    9.43 
  -2   1  -8   93.40    6.72 
  -2   1  -8  107.50    5.39 
   2   1   8  113.74    5.11 
   2   1   8  101.02    5.33 
   2   1   8  103.36    6.24 
  -2   1  -8  105.33    5.43 
   2   1   8  103.49    5.95 
   2   1   8  115.75    4.88 
   2   1   8  110.82    4.91 
  -2   1  -8   99.35    6.63 
  -2   1  -8  100.09    5.05 
   2   1   8  109.40    5.28 
  -2   1  -8  111.51    5.24 
   2   1   8  102.87    5.10 
  -2   1  -8  112.45    8.33 
  -2   1  -8  108.27    5.12 
  -2   1  -9   43.76    3.35 
   2   1   9   40.82    3.18 
   2   1   9   46.36    2.88 
   2   1   9   44.95    3.06 
  -2   1  -9   35.64    2.98 
   2   1   9   42.23    2.58 
   2   1   9   43.31    2.84 
  -2   1  -9   41.14    3.46 
  -2   1 -10  152.92    7.96 
  -2   1 -10  155.55    7.61 
   2   1  10  171.44    7.64 
   2   1  10  147.23    7.58 
   2   1  10  166.17    7.38 
   2   1  10  167.97    7.39 
   2   1  11   91.83    4.82 
   2   1  11   85.57    5.26 
  -2   1 -11   90.84    5.66 
   2   1  11   89.53    4.74 
   2   1  11   91.03    5.18 
  -2   1 -11   87.45    5.07 
   2   1  12   43.92    3.16 
  -2   1 -12   35.95    4.22 
  -2   1 -12   38.01    3.37 
  -2   1 -12   47.67    4.85 
  -2   1 -12   39.26    4.26 
   2   1  12   36.88    3.61 
   2   1  12   49.03    3.74 
   2   1  12   47.58    3.10 
  -2   1 -13    5.41    3.73 
   2   1  13    1.84    1.89 
   2   1  13    1.17    2.63 
  -2   1 -13    1.61    3.43 
  -2   1 -13   -0.91    3.89 
   2   1  13    0.93    1.64 
  -2   1 -14    7.29    3.22 
  -2   1 -14    7.80    3.72 
   2   1  14    3.69    2.33 
   2   1  14    9.29    1.87 
  -2   1 -14    3.45    3.75 
   2   1  14    6.89    1.48 
   2   1  15   72.62    4.15 
  -2   1 -15   76.39    5.36 
  -2   1 -15   75.39    5.12 
   2   1  15   73.73    3.90 
  -2   1 -15   74.81    5.54 
  -2   1 -15   61.83    4.67 
  -2   1 -16   50.05    3.78 
  -2   1 -16   56.51    4.53 
   2   1  16   57.64    3.23 
  -2   1 -16   50.62    3.53 
  -2   1 -16   51.27    4.20 
  -2   1 -17   11.22    2.31 
   2   1  17   12.09    1.40 
  -2   2  18   13.02    1.17 
   2   2 -18   11.22    2.28 
  -2   2  17   13.30    1.97 
   2   2 -17   15.84    3.00 
  -2   2  17   11.12    1.65 
  -2   2  16  142.36    6.64 
   2   2 -16  131.49    6.96 
   2   2 -16  151.41    7.85 
  -2   2  16  152.17    6.92 
   2   2 -15    7.41    3.62 
   2   2 -15    7.23    2.71 
   2   2 -15    6.46    2.44 
  -2   2  15    7.23    2.67 
   2   2 -14   28.06    3.37 
  -2   2  14   32.92    3.41 
  -2   2  14   30.72    2.51 
   2   2 -14   28.13    3.20 
  -2   2  14   27.42    2.18 
   2   2 -14   21.35    4.29 
   2   2 -13   15.79    3.77 
   2   2 -13   14.55    3.96 
   2   2 -13   16.97    2.86 
  -2   2  13   16.19    1.97 
   2   2 -13   17.54    2.87 
  -2   2  13   20.00    2.86 
   2   2 -12   20.62    2.96 
   2   2 -12   18.56    3.01 
  -2   2  12   23.45    2.18 
   2   2 -12   23.58    3.34 
  -2   2  12   21.35    3.11 
   2   2 -12   12.26    3.73 
   2   2 -12   18.08    3.64 
   2   2 -12   19.80    3.40 
  -2   2  11  315.83   13.79 
   2   2 -11  319.51   13.58 
  -2   2  11  320.45   13.45 
  -2   2  11  326.42   13.16 
   2   2 -11  305.08   13.34 
   2   2 -11  289.66   13.46 
   2   2 -11  305.47   13.42 
   2   2 -11  300.10   13.13 
   2   2 -11  321.64   13.84 
   2   2 -11  297.01   13.58 
   2   2 -10   82.89    4.68 
  -2   2  10  100.10    5.07 
  -2   2  10   88.36    4.57 
   2   2 -10   81.60    5.13 
  -2   2  10   82.18    5.33 
   2   2 -10   86.59    4.98 
   2   2 -10   86.63    4.60 
   2   2 -10   87.14    4.84 
   2   2 -10   94.36    5.17 
   2   2  -9  156.74    7.44 
  -2   2   9  167.44    7.54 
   2   2  -9  161.74    7.44 
   2   2  -9  157.77    7.43 
   2   2  -9  160.16    7.28 
  -2   2   9  156.60    7.15 
  -2   2   9  156.10    7.48 
   2   2  -9  152.52    7.19 
  -2   2   9  171.02    7.80 
  -2   2   8   13.46    2.28 
   2   2  -8   15.67    2.07 
   2   2  -8   16.70    2.58 
  -2   2   8   15.84    2.44 
  -2   2   8   15.17    2.37 
   2   2  -8   13.95    1.81 
   2   2  -8   17.05    2.07 
  -2   2   8   18.62    1.84 
   2   2  -7  141.47    6.22 
   2   2  -7  129.63    7.62 
  -2   2   7  134.53    6.43 
  -2   2   7  136.61    6.09 
  -2   2   7  132.58    6.45 
   2   2  -7  134.30    6.20 
   2   2  -7  130.03    7.33 
  -2   2   7  136.97    7.25 
   2   2  -7  138.13    6.13 
   2   2  -7  137.44    6.01 
   2   2  -7  138.06    5.89 
   2   2  -6  417.75   18.29 
  -2   2   6  421.79   17.31 
  -2   2   6  424.22   18.34 
   2   2  -6  431.51   18.57 
   2   2  -6  433.50   17.13 
  -2   2   6  399.24   17.06 
  -2   2   6  419.32   17.34 
   2   2  -6  437.33   17.11 
   2   2  -6  440.26   17.06 
  -2   2   6  387.94   17.31 
  -2   2   6  461.40   18.28 
   2   2  -5  574.55   22.36 
   2   2  -5  565.91   23.61 
   2   2  -5  577.83   22.38 
   2   2  -5  554.92   23.43 
   2   2  -5  514.11   22.32 
  -2   2   5  549.65   22.57 
   2   2  -5  571.82   22.97 
  -2   2   5  621.00   23.34 
  -2   2   5  562.87   22.57 
   2   2  -4 2774.73  105.92 
  -2   2   4 2673.46  105.49 
   2   2  -4 2644.66  105.42 
   2   2  -3  336.90   12.82 
  -2   2   3  265.48   12.00 
   2   2  -2 1025.24   43.07 
   2   2  -2 1044.04   42.28 
   2   2  -2 1115.06   42.82 
   2   2  -1 1104.76   42.57 
   2   2  -1 1034.99   43.12 
   2   2  -1 1044.36   42.81 
   2   2   0 1141.47   42.97 
   2   2   0 1058.48   42.51 
   2   2   0 1191.52   42.85 
   2   2   0 1182.99   43.41 
  -2   2   0  973.35   42.00 
  -2   2   0 1071.72   42.74 
   2   2   1  339.77   14.26 
  -2   2  -1  313.63   14.15 
   2   2   1  340.07   14.35 
   2   2   1  347.12   14.33 
   2   2   1  327.83   14.67 
   2   2   2 1035.57   39.70 
  -2   2  -2  916.52   39.54 
   2   2   2  985.53   39.56 
   2   2   2 1012.25   39.74 
  -2   2  -3   60.60    4.30 
   2   2   3   70.19    4.10 
  -2   2  -4    7.45    1.34 
  -2   2  -4    7.42    1.39 
  -2   2  -4    7.07    2.20 
   2   2   4    8.31    1.57 
  -2   2  -4    8.91    2.25 
   2   2   4    4.20    1.57 
   2   2   4    6.15    1.28 
   2   2   4    7.94    1.68 
   2   2   5  399.26   17.04 
   2   2   5  386.60   16.22 
  -2   2  -5  406.51   16.17 
   2   2   5  403.40   16.18 
  -2   2  -5  399.22   17.63 
   2   2   5  424.26   16.09 
   2   2   5  402.97   17.25 
  -2   2  -5  354.82   17.65 
   2   2   5  385.42   16.36 
  -2   2  -5  330.80   16.60 
   2   2   5  397.94   16.59 
  -2   2  -5  405.05   16.17 
  -2   2  -5  411.42   16.07 
  -2   2  -5  394.17   16.04 
   2   2   6  727.67   29.16 
   2   2   6  723.97   30.37 
  -2   2  -6  744.88   29.14 
   2   2   6  716.77   29.10 
   2   2   6  703.10   29.99 
   2   2   6  692.48   28.88 
  -2   2  -6  750.57   29.20 
  -2   2  -6  689.70   30.08 
  -2   2  -6  729.75   29.17 
  -2   2  -6  718.06   30.94 
  -2   2  -6  734.39   29.00 
  -2   2  -6  712.94   31.27 
   2   2   6  774.97   29.02 
   2   2   6  748.25   29.69 
  -2   2  -7   30.23    2.30 
  -2   2  -7   34.18    2.48 
   2   2   7   35.36    2.58 
  -2   2  -7   29.08    3.69 
   2   2   7   33.41    2.33 
  -2   2  -7   34.66    2.82 
   2   2   7   33.16    2.51 
  -2   2  -7   29.83    2.70 
  -2   2  -7   33.16    2.56 
  -2   2  -7   34.03    4.04 
   2   2   8  255.43   10.19 
  -2   2  -8  242.96   10.20 
  -2   2  -8  247.13   10.69 
  -2   2  -8  244.02   10.47 
   2   2   8  212.33   10.46 
  -2   2  -8  222.86   10.32 
  -2   2  -8  233.50   10.52 
   2   2   8  245.41   10.36 
   2   2   8  245.05   10.32 
   2   2   9  122.69    5.88 
  -2   2  -9  123.51    6.19 
  -2   2  -9  115.93    6.14 
   2   2   9  127.16    5.73 
   2   2   9  118.55    6.24 
  -2   2  -9  111.59    6.49 
  -2   2  -9  117.45    6.32 
   2   2   9  127.31    6.02 
   2   2  10   38.71    3.17 
  -2   2 -10   38.74    4.11 
  -2   2 -10   40.45    3.38 
   2   2  10   38.74    2.66 
   2   2  10   39.29    2.97 
  -2   2 -10   38.47    3.79 
   2   2  10   40.86    3.51 
  -2   2 -10   38.63    3.41 
   2   2  11   81.04    4.58 
  -2   2 -11   72.51    4.85 
   2   2  11   79.70    4.88 
  -2   2 -11   75.03    5.77 
  -2   2 -11   73.84    5.07 
   2   2  11   80.34    4.09 
   2   2  11   80.45    4.31 
  -2   2 -12   28.58    3.41 
   2   2  12   30.03    2.28 
   2   2  12   33.15    2.55 
  -2   2 -12   29.92    3.53 
   2   2  12   29.24    3.16 
   2   2  12   30.31    2.84 
  -2   2 -12   23.34    3.99 
  -2   2 -13   21.62    3.30 
  -2   2 -13   24.33    3.29 
   2   2  13   28.80    2.65 
   2   2  13   22.25    1.99 
   2   2  13   30.22    3.08 
   2   2  13   25.66    2.20 
  -2   2 -13   25.93    4.64 
   2   2  14   72.98    3.78 
   2   2  14   84.18    4.53 
  -2   2 -14   75.95    4.69 
  -2   2 -14   82.56    6.01 
  -2   2 -14   69.93    4.91 
  -2   2 -15   79.57    4.90 
   2   2  15   79.68    4.33 
  -2   2 -15   85.51    5.71 
  -2   2 -15   88.96    5.49 
   2   2  16   35.66    2.35 
  -2   2 -16   30.74    3.13 
  -2   2 -16   31.41    3.72 
   2   2  17   14.17    1.18 
   2   3 -17   11.03    2.05 
  -2   3  17   15.66    1.29 
   2   3 -16   13.33    2.17 
   2   3 -16   10.47    2.79 
  -2   3  16   10.17    1.60 
   2   3 -15    7.83    2.56 
   2   3 -15   10.98    3.27 
  -2   3  15    7.39    1.57 
  -2   3  15    7.72    1.79 
  -2   3  14   61.41    3.67 
   2   3 -14   59.18    4.98 
  -2   3  14   64.05    3.79 
   2   3 -14   58.74    4.47 
  -2   3  14   59.22    3.30 
  -2   3  13  118.97    5.81 
  -2   3  13  112.84    5.73 
   2   3 -13  104.72    5.76 
   2   3 -13  111.48    6.43 
   2   3 -13  124.54    6.89 
  -2   3  13  112.92    5.45 
   2   3 -13  110.03    6.97 
  -2   3  12   58.59    3.60 
   2   3 -12   49.96    3.89 
   2   3 -12   57.86    4.65 
  -2   3  12   59.56    3.92 
  -2   3  12   64.81    4.99 
   2   3 -12   68.32    4.68 
   2   3 -12   60.96    5.04 
  -2   3  11  362.23   14.91 
   2   3 -11  325.00   15.12 
   2   3 -11  332.39   14.68 
   2   3 -11  351.84   15.11 
  -2   3  11  357.24   14.49 
  -2   3  11  314.14   14.51 
  -2   3  11  354.03   15.08 
   2   3 -11  343.49   15.01 
  -2   3  10  289.13   12.55 
   2   3 -10  258.14   12.23 
  -2   3  10  283.02   12.55 
   2   3 -10  266.66   12.56 
  -2   3  10  276.16   12.03 
   2   3 -10  262.21   12.42 
  -2   3  10  308.71   12.26 
   2   3 -10  278.37   12.36 
   2   3 -10  292.71   12.61 
  -2   3   9   73.23    4.57 
  -2   3   9   60.33    4.24 
   2   3  -9   56.53    3.90 
   2   3  -9   59.29    4.28 
  -2   3   9   59.32    3.81 
   2   3  -9   55.72    4.01 
  -2   3   9   59.23    4.03 
   2   3  -9   50.75    3.78 
   2   3  -8  217.98    9.80 
   2   3  -8  223.34    9.72 
   2   3  -8  224.44    9.52 
   2   3  -8  227.07    9.94 
  -2   3   8  216.62   10.12 
   2   3  -8  222.82    9.92 
  -2   3   8  232.14    9.75 
  -2   3   8  219.54    9.32 
  -2   3   8  206.78    9.92 
  -2   3   8  220.54    9.98 
   2   3  -7  277.19   11.57 
   2   3  -7  279.70   11.71 
   2   3  -7  263.73   11.40 
   2   3  -7  272.08   11.41 
  -2   3   7  278.79   11.64 
  -2   3   7  266.56   11.26 
  -2   3   7  269.51   11.83 
  -2   3   7  276.45   12.01 
   2   3  -6  291.95   12.03 
  -2   3   6  283.05   12.29 
   2   3  -6  288.24   12.15 
   2   3  -6  269.68   13.55 
  -2   3   6  283.39   12.51 
  -2   3   6  294.42   11.82 
   2   3  -6  285.13   12.03 
  -2   3   6  292.41   11.93 
  -2   3   6  294.43   12.24 
   2   3  -5  479.61   18.92 
  -2   3   5  434.95   18.90 
   2   3  -5  460.93   18.66 
  -2   3   5  480.72   18.64 
   2   3  -5  470.10   18.79 
  -2   3   5  461.06   18.93 
   2   3  -5  460.18   18.77 
   2   3  -5  421.76   20.00 
  -2   3   5  471.37   18.70 
   2   3  -5  468.34   18.67 
  -2   3   4   25.10    2.09 
  -2   3   4   25.11    1.88 
   2   3  -4   30.18    1.98 
   2   3  -4   33.42    2.23 
   2   3  -4   26.64    3.70 
   2   3  -4   29.62    1.95 
   2   3  -4   27.03    2.03 
  -2   3   4   29.05    1.87 
   2   3  -4   30.15    2.20 
  -2   3   4   25.30    2.41 
   2   3  -4   25.25    2.48 
   2   3  -4   26.22    2.68 
   2   3  -4   27.40    1.95 
  -2   3   4   27.15    2.30 
   2   3  -3  246.12   11.13 
   2   3  -3  252.57   11.15 
   2   3  -3  248.79   10.17 
   2   3  -3  236.92   10.30 
   2   3  -3  254.02   10.43 
   2   3  -3  251.61   10.38 
  -2   3   3  234.03   10.46 
   2   3  -3  257.24   10.26 
   2   3  -3  249.14   10.60 
   2   3  -3  256.13   10.34 
  -2   3   3  251.38   10.29 
  -2   3   3  241.38   10.22 
  -2   3   3  241.13   10.43 
  -2   3   2  605.79   24.65 
  -2   3   2  592.35   24.76 
  -2   3   2  613.27   24.78 
   2   3  -2  648.33   25.61 
   2   3  -2  608.97   25.31 
  -2   3   2  616.97   24.53 
   2   3  -2  602.23   24.76 
   2   3  -2  641.56   24.69 
   2   3  -2  619.11   24.72 
   2   3  -2  611.01   24.55 
  -2   3   2  626.84   24.65 
   2   3  -2  694.84   25.21 
   2   3  -2  610.55   24.69 
  -2   3   1  193.83    8.05 
   2   3  -1  187.32    8.09 
   2   3  -1  209.85    8.65 
   2   3  -1  202.16    8.89 
  -2   3   1  186.91    7.92 
  -2   3   1  185.64    8.16 
  -2   3   1  187.82    8.17 
  -2   3   1  191.27    8.05 
   2   3  -1  186.63    8.13 
   2   3  -1  189.82    8.62 
   2   3  -1  184.05    8.01 
   2   3   0  256.83   11.20 
   2   3   0  248.68   10.93 
  -2   3   0  259.70   12.25 
   2   3   0  263.85   10.97 
  -2   3   0  265.92   10.87 
  -2   3   0  266.22   10.76 
   2   3   0  286.43   11.75 
   2   3   0  278.65   12.92 
   2   3   0  262.65   11.02 
  -2   3   0  257.24   10.78 
   2   3   0  261.42   10.91 
  -2   3   0  259.26   10.85 
  -2   3  -1    2.34    1.25 
   2   3   1    0.85    1.19 
  -2   3  -1    3.51    1.96 
  -2   3  -1    3.94    1.23 
  -2   3  -1    2.48    1.16 
   2   3   1    3.52    2.27 
   2   3   1    3.86    1.60 
   2   3   1    3.61    1.48 
  -2   3  -1    2.29    0.78 
   2   3   1    2.77    1.59 
  -2   3  -1    3.00    1.30 
   2   3   1    3.30    1.36 
   2   3   2  829.73   31.98 
  -2   3  -2  808.51   31.89 
  -2   3  -2  798.13   31.82 
   2   3   2  780.84   31.97 
  -2   3  -2  814.91   31.84 
   2   3   2  686.41   31.91 
   2   3   2  835.94   31.83 
   2   3   2  852.22   32.55 
   2   3   2  873.26   32.91 
  -2   3  -2  804.41   31.85 
  -2   3  -2  798.32   33.33 
  -2   3  -3  512.93   21.07 
  -2   3  -3  511.29   21.16 
   2   3   3  514.87   21.32 
  -2   3  -3  535.46   21.11 
  -2   3  -3  524.80   21.13 
   2   3   3  549.23   21.08 
  -2   3  -3  505.45   22.61 
   2   3   3  523.47   21.04 
   2   3   4  236.55   11.40 
   2   3   4  259.65   10.38 
  -2   3  -4  248.99   10.49 
  -2   3  -4  249.12   10.60 
   2   3   4  242.21   10.39 
   2   3   4  239.38   10.77 
   2   3   4  257.46   10.67 
  -2   3  -4  257.47   10.53 
   2   3   4  241.88   10.69 
  -2   3  -4  238.86   12.11 
  -2   3  -5  294.87   12.16 
  -2   3  -5  274.93   12.33 
   2   3   5  280.36   12.47 
   2   3   5  286.29   13.26 
  -2   3  -5  267.79   13.91 
   2   3   5  289.79   12.33 
  -2   3  -5  294.74   12.36 
  -2   3  -5  274.83   12.07 
   2   3   5  282.82   12.02 
   2   3   5  310.14   12.27 
  -2   3  -5  300.99   12.21 
   2   3   5  300.61   11.95 
   2   3   6   12.48    2.10 
   2   3   6   11.47    1.83 
  -2   3  -6   13.56    2.30 
   2   3   6    9.92    2.63 
  -2   3  -6   11.84    1.95 
  -2   3  -6   15.17    2.19 
  -2   3  -6   12.61    2.36 
   2   3   6   14.59    2.21 
   2   3   7   87.17    4.44 
  -2   3  -7   82.56    4.55 
   2   3   7   93.70    4.77 
  -2   3  -7   93.66    5.13 
   2   3   7   85.63    4.60 
  -2   3  -7   85.11    4.85 
   2   3   8   55.57    3.54 
  -2   3  -8   51.17    4.05 
  -2   3  -8   46.23    3.27 
   2   3   8   55.81    3.57 
   2   3   8   51.61    3.17 
  -2   3  -8   49.96    3.86 
  -2   3  -9  338.12   13.51 
  -2   3  -9  325.16   13.98 
   2   3   9  320.22   13.29 
  -2   3  -9  336.79   14.29 
   2   3   9  303.71   13.59 
   2   3   9  284.74   13.76 
   2   3   9  332.25   13.60 
  -2   3  -9  303.48   14.05 
  -2   3 -10  321.36   15.12 
   2   3  10  337.06   14.78 
   2   3  10  325.45   14.16 
   2   3  10  364.29   14.55 
  -2   3 -10  354.00   15.13 
  -2   3 -10  342.17   15.06 
   2   3  10  353.57   14.48 
  -2   3 -11   69.60    5.33 
  -2   3 -11   68.02    5.19 
   2   3  11   73.34    4.13 
  -2   3 -11   72.15    4.93 
   2   3  11   76.37    4.70 
   2   3  11   69.86    4.03 
   2   3  11   70.46    3.76 
   2   3  12  179.77    8.02 
  -2   3 -12  173.58    9.10 
   2   3  12  176.91    8.03 
   2   3  12  195.97    8.51 
  -2   3 -12  166.64    9.11 
   2   3  12  184.37    7.86 
   2   3  13  215.05    9.27 
  -2   3 -13  205.53    9.85 
  -2   3 -13  199.57   10.04 
   2   3  13  199.12    8.74 
   2   3  14    3.05    1.69 
  -2   3 -14    7.13    3.14 
  -2   3 -14    0.54    3.21 
  -2   3 -14    7.62    2.61 
   2   3  15   45.22    2.75 
  -2   3 -15   44.81    3.91 
   2   3  16   47.72    2.41 
  -2   3 -16   40.82    3.16 
  -2   4  16   23.46    1.37 
   2   4 -16   21.01    1.87 
   2   4 -15   91.46    5.04 
  -2   4  15  102.56    4.41 
  -2   4  15   87.56    4.28 
  -2   4  14   18.77    2.10 
   2   4 -14   19.56    2.37 
   2   4 -14   28.39    2.85 
  -2   4  14   24.75    1.74 
   2   4 -14   21.05    3.30 
  -2   4  14   24.08    2.14 
   2   4 -13   15.17    2.62 
  -2   4  13   15.44    2.17 
  -2   4  13   16.95    2.44 
  -2   4  13   16.36    1.81 
   2   4 -13   20.03    3.49 
   2   4 -13   15.83    2.80 
   2   4 -12   43.64    4.64 
  -2   4  12   46.84    3.08 
  -2   4  12   45.52    3.58 
   2   4 -12   49.14    3.88 
   2   4 -12   47.06    3.78 
  -2   4  12   51.47    3.35 
  -2   4  11   14.50    2.43 
   2   4 -11   16.28    3.12 
  -2   4  11   12.65    2.21 
  -2   4  11   14.38    2.85 
   2   4 -11   10.57    2.62 
  -2   4  10    8.50    2.63 
   2   4 -10    5.90    2.65 
  -2   4  10   13.04    2.58 
   2   4 -10    2.91    2.76 
  -2   4  10    5.16    2.89 
  -2   4  10    6.33    2.09 
   2   4 -10    7.50    3.60 
  -2   4   9  143.97    7.39 
   2   4  -9  153.01    7.82 
  -2   4   9  151.80    7.32 
   2   4  -9  156.63    8.02 
   2   4  -9  147.58    7.42 
  -2   4   9  147.87    7.58 
  -2   4   9  157.89    6.76 
   2   4  -8  173.10    7.72 
   2   4  -8  154.74    8.12 
  -2   4   8  166.35    7.86 
   2   4  -8  154.71    8.17 
   2   4  -8  167.75    8.35 
  -2   4   8  163.67    7.87 
   2   4  -8  167.67    7.81 
  -2   4   8  181.19    8.16 
  -2   4   8  164.33    7.36 
  -2   4   7   -0.09    1.91 
  -2   4   7   -0.10    2.28 
  -2   4   7    0.94    1.28 
   2   4  -7    0.09    1.94 
   2   4  -7    0.86    2.64 
   2   4  -7    1.10    2.33 
  -2   4   7    2.62    1.56 
   2   4  -6   20.96    3.04 
  -2   4   6   29.52    2.16 
   2   4  -6   27.82    2.70 
  -2   4   6   30.47    2.91 
   2   4  -6   34.01    3.04 
   2   4  -6   27.17    2.68 
   2   4  -6   30.13    3.11 
  -2   4   6   28.94    2.54 
  -2   4   6   25.62    2.34 
   2   4  -5  174.62    8.25 
   2   4  -5  194.73    8.29 
   2   4  -5  172.96    7.88 
  -2   4   5  175.88    7.77 
   2   4  -5  176.72    8.08 
  -2   4   5  181.94    7.87 
   2   4  -5  172.88    7.88 
  -2   4   5  167.07    8.28 
  -2   4   5  175.80    8.17 
  -2   4   4    9.28    2.60 
  -2   4   4   12.93    1.80 
  -2   4   4   14.34    1.97 
   2   4  -4    7.34    1.93 
   2   4  -4   10.68    2.28 
   2   4  -4   12.65    1.68 
  -2   4   4   11.66    2.51 
   2   4  -4   14.20    2.36 
   2   4  -4   10.11    2.01 
  -2   4   4   12.63    1.43 
  -2   4   3  257.97   10.97 
   2   4  -3  264.79   11.04 
   2   4  -3  264.71   11.07 
   2   4  -3  261.19   11.09 
   2   4  -3  266.17   11.17 
  -2   4   3  266.10   11.28 
  -2   4   3  248.58   11.25 
  -2   4   3  261.54   10.92 
  -2   4   3  230.40   11.15 
  -2   4   3  251.12   10.69 
  -2   4   2   98.14    5.07 
  -2   4   2   93.42    4.74 
   2   4  -2   93.37    4.83 
  -2   4   2   97.23    4.75 
  -2   4   2   95.98    4.52 
   2   4  -2   93.38    4.89 
  -2   4   2   84.06    4.93 
   2   4  -2   94.86    4.86 
  -2   4   2  101.54    5.14 
  -2   4   1  541.04   22.34 
  -2   4   1  539.23   22.48 
  -2   4   1  557.58   22.36 
   2   4  -1  558.29   22.64 
   2   4  -1  565.81   22.55 
  -2   4   1  578.28   22.55 
   2   4  -1  573.47   22.50 
   2   4  -1  571.77   22.62 
  -2   4   1  519.90   22.54 
  -2   4   0  240.16   10.07 
  -2   4   0  233.69   10.02 
   2   4   0  245.57   10.32 
   2   4   0  236.47   10.23 
   2   4   0  252.63   10.35 
  -2   4   0  211.59   10.03 
  -2   4   0  234.85   10.18 
   2   4   0  237.57   10.11 
  -2   4  -1  643.22   26.37 
   2   4   1  662.10   26.69 
  -2   4  -1  641.81   26.56 
  -2   4  -1  677.63   26.53 
   2   4   1  633.08   26.59 
  -2   4  -1  656.24   26.61 
   2   4   1  686.49   26.80 
   2   4   1  676.36   26.26 
   2   4   2  116.60    5.76 
  -2   4  -2  113.51    5.85 
   2   4   2  118.48    6.00 
   2   4   2  122.49    6.06 
  -2   4  -2  116.28    5.69 
  -2   4  -2  122.83    5.83 
  -2   4  -2  118.28    5.64 
  -2   4  -3  160.48    7.43 
   2   4   3  157.67    7.41 
  -2   4  -3  168.80    7.70 
  -2   4  -3  162.37    7.48 
   2   4   3  173.82    7.73 
  -2   4  -3  164.37    7.52 
  -2   4  -3  152.89    7.49 
  -2   4  -3  166.29    7.42 
   2   4   3  160.96    7.76 
  -2   4  -4   34.35    3.24 
   2   4   4   33.33    2.59 
   2   4   4   29.91    3.11 
   2   4   4   33.24    2.72 
  -2   4  -4   29.83    2.83 
  -2   4  -4   33.75    3.06 
  -2   4  -4   34.84    2.84 
   2   4   4   30.08    3.24 
  -2   4  -4   28.89    2.84 
   2   4   5   96.95    4.70 
  -2   4  -5   97.96    5.46 
  -2   4  -5   87.21    4.92 
   2   4   5   95.16    5.34 
   2   4   5  104.05    5.62 
  -2   4  -5   88.82    5.25 
   2   4   5   85.23    5.17 
   2   4   5   96.23    4.90 
  -2   4  -5   88.20    4.95 
   2   4   6  267.87   12.06 
  -2   4  -6  284.37   11.95 
  -2   4  -6  251.09   12.24 
   2   4   6  278.90   11.68 
  -2   4  -6  303.84   12.20 
   2   4   6  266.08   12.43 
   2   4   6  277.52   12.24 
   2   4   6  278.28   11.84 
  -2   4  -7  246.74   10.95 
   2   4   7  246.63   10.08 
   2   4   7  230.79    9.81 
  -2   4  -7  234.87   10.20 
   2   4   7  226.78   10.42 
   2   4   7  232.17   10.39 
  -2   4  -7  230.47   10.78 
  -2   4  -8  219.06   10.68 
  -2   4  -8  232.10   11.48 
   2   4   8  257.72   10.62 
  -2   4  -8  241.14   11.44 
   2   4   8  256.79   10.95 
  -2   4  -8  247.70   10.75 
   2   4   8  263.20   11.06 
  -2   4  -9   43.27    3.06 
  -2   4  -9   44.80    4.39 
   2   4   9   40.24    3.12 
  -2   4  -9   41.81    3.35 
  -2   4  -9   40.37    4.54 
   2   4   9   44.08    2.82 
   2   4   9   39.83    3.53 
  -2   4 -10   31.35    4.01 
   2   4  10   33.52    3.40 
   2   4  10   29.97    2.09 
   2   4  10   32.70    2.75 
   2   4  10   32.65    3.02 
  -2   4 -10   34.22    3.21 
   2   4  10   36.83    2.41 
   2   4  11  140.86    6.21 
   2   4  11  140.71    6.85 
   2   4  11  137.53    6.45 
  -2   4 -11  139.68    7.83 
  -2   4 -11  132.98    7.82 
  -2   4 -12   84.08    5.58 
   2   4  12   81.21    4.45 
   2   4  12   77.06    4.00 
  -2   4 -12   85.36    5.85 
  -2   4 -13    6.49    2.99 
   2   4  13   12.15    1.94 
  -2   4 -13    7.83    3.33 
   2   4  13    9.09    1.17 
   2   4  14    3.09    1.36 
  -2   4 -14   -0.31    2.66 
  -2   4 -14    3.69    2.32 
   2   4  15    4.18    0.91 
  -2   4 -15    6.12    2.08 
  -2   5  13   40.34    2.66 
   2   5 -13   43.39    3.12 
  -2   5  13   42.58    2.25 
  -2   5  13   49.38    2.60 
   2   5 -13   43.52    3.24 
  -2   5  12   77.42    3.78 
  -2   5  12   81.78    4.01 
  -2   5  12   77.51    4.25 
   2   5 -12   72.33    4.69 
   2   5 -12   73.45    5.04 
   2   5 -11   16.16    3.35 
   2   5 -11   19.33    3.36 
  -2   5  11   16.54    2.11 
  -2   5  11   14.69    1.92 
  -2   5  11   14.42    2.45 
   2   5 -10   62.68    5.00 
  -2   5  10   68.66    3.89 
  -2   5  10   72.36    4.25 
   2   5 -10   64.96    4.94 
   2   5  -9   43.02    4.05 
  -2   5   9   39.68    3.58 
  -2   5   9   37.88    2.35 
  -2   5   9   40.23    3.10 
  -2   5   9   42.71    3.56 
   2   5  -9   39.02    4.16 
  -2   5   8   29.81    3.30 
   2   5  -8   30.54    3.58 
  -2   5   8   32.04    2.31 
  -2   5   8   31.86    3.63 
  -2   5   8   35.48    2.98 
   2   5  -7   65.94    3.74 
   2   5  -7   76.81    5.14 
   2   5  -7   69.40    4.36 
  -2   5   7   69.98    3.83 
  -2   5   7   76.29    4.84 
  -2   5   7   70.87    4.64 
  -2   5   7   72.61    4.52 
   2   5  -7   73.09    4.72 
   2   5  -6   53.24    3.35 
  -2   5   6   61.13    4.31 
   2   5  -6   63.35    4.49 
   2   5  -6   53.47    3.88 
  -2   5   6   55.91    4.08 
   2   5  -6   55.69    3.92 
  -2   5   6   52.45    3.39 
  -2   5   5  274.17   11.15 
   2   5  -5  230.01   11.05 
   2   5  -5  239.87   10.95 
  -2   5   5  230.81   11.13 
  -2   5   5  236.66   10.60 
   2   5  -5  254.20   11.07 
   2   5  -5  248.26   10.82 
   2   5  -4  210.90    9.74 
   2   5  -4  228.46   10.21 
  -2   5   4  224.42    9.44 
  -2   5   4  210.32   10.17 
  -2   5   4  213.67   10.30 
   2   5  -4  244.82   10.13 
  -2   5   4  218.42    9.86 
   2   5  -4  228.69   10.20 
  -2   5   3  167.42    7.72 
   2   5  -3  178.54    7.90 
   2   5  -3  171.21    7.82 
   2   5  -3  159.43    7.74 
  -2   5   3  165.70    7.35 
   2   5  -3  148.08    7.92 
   2   5  -3  161.12    7.35 
  -2   5   3  151.00    8.08 
   2   5  -3  177.28    7.95 
   2   5  -2   42.76    3.09 
  -2   5   2   40.96    2.86 
   2   5  -2   41.42    3.50 
   2   5  -2   45.25    3.53 
   2   5  -2   39.66    3.36 
  -2   5   2   42.83    3.42 
  -2   5   2   42.49    3.70 
  -2   5   1  229.79   10.49 
   2   5  -1  251.56   10.61 
  -2   5   1  254.86   10.65 
   2   5  -1  235.39   11.03 
   2   5  -1  268.83   11.07 
   2   5  -1  255.91   11.04 
  -2   5   1  241.62   10.97 
  -2   5   1  228.31   10.83 
   2   5  -1  251.54   10.86 
   2   5   0   57.95    4.20 
  -2   5   0   61.63    3.68 
  -2   5   0   58.57    3.69 
   2   5   0   61.29    3.45 
   2   5   0   71.89    4.31 
   2   5   0   65.79    4.09 
   2   5   0   60.96    3.90 
  -2   5   0   57.36    4.22 
   2   5   1  237.61   10.54 
  -2   5  -1  236.86   10.36 
   2   5   1  224.07   10.59 
   2   5   1  247.44   10.43 
   2   5   1  241.58   10.75 
  -2   5  -1  224.03   10.57 
  -2   5  -1  234.73   10.44 
   2   5   2  205.85    9.49 
  -2   5  -2  216.03    9.83 
   2   5   2  215.09    9.53 
  -2   5  -2  208.59    9.62 
  -2   5  -2  218.36    9.81 
  -2   5  -2  203.23    9.28 
   2   5   2  227.78    9.95 
  -2   5  -2  213.49    9.73 
   2   5   3  197.11    9.16 
  -2   5  -3  188.48    9.34 
  -2   5  -3  218.08    9.46 
   2   5   3  203.46    9.68 
  -2   5  -3  207.39    9.63 
  -2   5  -3  214.21    9.37 
   2   5   3  208.46    9.48 
   2   5   3  200.84    9.18 
  -2   5  -3  203.88    9.18 
  -2   5  -4   15.41    2.53 
  -2   5  -4   18.50    2.62 
  -2   5  -4   17.46    3.19 
   2   5   4   15.40    2.11 
   2   5   4   19.59    2.68 
  -2   5  -4   18.50    2.65 
   2   5   4   24.66    3.31 
   2   5   4   18.24    2.87 
  -2   5  -5   31.32    3.17 
  -2   5  -5   37.27    3.48 
  -2   5  -5   35.50    3.97 
  -2   5  -5   41.14    3.04 
  -2   5  -5   43.06    3.54 
   2   5   5   36.17    3.03 
   2   5   5   42.44    2.83 
   2   5   5   44.10    3.55 
   2   5   5   42.37    3.92 
  -2   5  -6  155.18    7.64 
   2   5   6  168.62    7.95 
   2   5   6  156.30    8.16 
   2   5   6  169.64    7.59 
   2   5   6  159.28    7.23 
  -2   5  -6  165.18    8.10 
  -2   5  -6  166.13    7.77 
  -2   5  -6  159.27    8.44 
   2   5   7   83.61    4.66 
   2   5   7   78.99    4.26 
   2   5   7   73.08    3.83 
   2   5   7   76.77    4.97 
  -2   5  -7   83.95    4.79 
  -2   5  -7   84.63    4.53 
  -2   5  -7   73.63    5.14 
  -2   5  -8  124.21    6.01 
   2   5   8  124.56    5.78 
   2   5   8  121.94    6.08 
  -2   5  -8  115.97    6.89 
  -2   5  -8  122.32    6.50 
  -2   5  -9   39.62    2.80 
   2   5   9   39.53    2.48 
  -2   5  -9   44.22    4.70 
  -2   5  -9   35.21    4.07 
   2   5   9   44.96    2.92 
  -2   5  -9   40.94    3.69 
  -2   5 -10   73.77    4.77 
  -2   5 -10   65.84    5.08 
   2   5  10   73.44    3.79 
  -2   5 -11   89.01    5.08 
   2   5  11   83.24    4.22 
  -2   5 -11   79.35    5.22 
   2   5  11   81.17    3.92 
   2   5  12  122.54    5.05 
  -2   5 -12  113.64    5.71 
  -2   5 -13   34.30    2.75 
   2   5  13   43.83    2.21 
  -2   6  11   22.71    1.51 
   2   6 -11   27.93    2.48 
   2   6 -11   22.51    2.25 
   2   6 -10   68.17    4.08 
  -2   6  10   68.39    3.40 
   2   6  -9   24.28    3.24 
  -2   6   9   24.36    2.35 
   2   6  -9   24.85    2.72 
   2   6  -8   16.35    3.05 
  -2   6   8   13.24    2.32 
   2   6  -8   12.84    2.28 
  -2   6   7   73.46    3.61 
  -2   6   7   75.26    4.38 
   2   6  -7   71.95    4.21 
   2   6  -7   77.07    4.79 
  -2   6   7   72.05    4.15 
   2   6  -6    8.29    1.65 
   2   6  -6   10.17    2.79 
   2   6  -6    6.45    2.25 
  -2   6   6   10.89    2.40 
   2   6  -6    9.71    1.94 
  -2   6   6    6.67    2.36 
  -2   6   6    6.46    1.48 
  -2   6   5   15.15    2.67 
   2   6  -5   15.60    2.89 
   2   6  -5   13.86    2.63 
   2   6  -5   15.03    2.12 
  -2   6   5   12.73    1.83 
   2   6  -4   90.06    5.28 
  -2   6   4   93.37    4.70 
   2   6  -4   85.22    4.79 
   2   6  -4   90.31    5.04 
   2   6  -3   37.07    2.96 
   2   6  -3   36.06    3.23 
  -2   6   3   42.15    2.90 
  -2   6   2   26.98    3.34 
  -2   6   2   21.15    2.60 
   2   6  -2   16.74    2.18 
   2   6  -2   22.54    3.01 
   2   6  -2   24.12    2.76 
   2   6  -1  129.43    6.64 
   2   6  -1  128.63    6.63 
  -2   6   1  130.80    6.72 
   2   6  -1  117.05    5.87 
  -2   6   1  124.72    6.36 
   2   6  -1  142.83    6.46 
   2   6   0   94.93    5.43 
   2   6   0  105.49    5.32 
   2   6   0  105.70    5.32 
  -2   6   0   92.38    5.42 
   2   6   0  101.88    5.44 
   2   6   1   93.27    4.89 
   2   6   1   86.15    5.28 
  -2   6  -1   82.01    5.09 
   2   6   1   87.78    4.74 
  -2   6  -2   17.29    2.74 
   2   6   2   17.97    2.30 
   2   6   2   14.59    2.25 
  -2   6  -2   16.28    2.77 
  -2   6  -3  273.80   12.74 
   2   6   3  296.45   12.82 
   2   6   3  309.00   12.55 
  -2   6  -3  294.78   12.82 
   2   6   3  301.31   12.57 
  -2   6  -4  178.27    8.53 
   2   6   4  181.63    8.47 
   2   6   4  182.19    8.14 
   2   6   4  194.26    8.85 
   2   6   4  185.29    8.23 
  -2   6  -4  200.28    8.93 
   2   6   4  191.29    8.62 
  -2   6  -4  183.76    8.65 
   2   6   5  141.61    6.32 
   2   6   5  136.31    6.18 
   2   6   5  155.08    6.99 
  -2   6  -5  128.93    6.47 
   2   6   5  137.65    6.77 
  -2   6  -5  141.38    6.73 
   2   6   5  141.51    6.53 
   2   6   6   28.78    2.76 
   2   6   6   21.29    2.10 
  -2   6  -6   19.60    2.36 
  -2   6  -6   23.58    2.50 
   2   6   6   22.45    1.84 
   2   6   6   22.57    2.32 
  -2   6  -7   20.02    2.11 
   2   6   7   19.91    1.83 
  -2   6  -7   16.36    2.30 
   2   6   7   18.66    1.53 
   2   6   7   21.74    2.22 
   2   6   7   17.02    1.94 
  -2   6  -8  261.08   11.53 
  -2   6  -8  268.17   11.93 
   2   6   8  272.36   11.42 
   2   6   8  291.59   11.60 
   2   6   9   42.42    2.67 
  -2   6  -9   46.61    3.21 
   2   6   9   49.13    2.47 
   2   6  10   17.57    1.14 
  -2   7   7   16.03    1.24 
   2   7  -6   34.61    2.29 
  -2   7   6   37.49    2.17 
   2   7  -5   26.42    1.96 
  -2   7   5   27.14    2.01 
  -2   7   5   26.72    1.62 
   2   7  -4   66.04    3.46 
  -2   7   4   75.47    3.46 
   2   7  -3   13.68    1.67 
  -2   7   3   13.10    1.55 
   2   7  -2  100.63    4.86 
   2   7  -2   99.95    4.94 
  -2   7   2  102.57    4.79 
  -2   7   1    5.61    1.80 
   2   7  -1    6.14    1.50 
   2   7  -1    3.08    1.64 
  -2   7   1    4.22    1.54 
   2   7   0   -0.94    1.52 
  -2   7   0   -0.30    1.76 
   2   7   0    0.36    1.28 
   2   7   0    1.91    1.40 
   2   7   1    4.05    1.68 
   2   7   1    4.80    1.32 
  -2   7  -1    5.74    1.69 
   2   7   1    6.35    1.29 
   2   7   2   85.93    4.11 
  -2   7  -2   92.47    4.48 
   2   7   2   89.85    4.13 
   2   7   3   48.33    2.49 
  -2   7  -3   52.37    3.04 
   2   7   3   52.58    2.57 
  -2   7  -4   61.59    3.07 
   2   7   4   49.95    2.48 
  -2   7  -5   13.15    1.44 
   2   7   5   11.33    1.15 
  -3  -7   7    9.28    1.31 
  -3  -7   6   13.02    1.71 
  -3  -7   6   15.16    1.53 
  -3  -7   6   12.41    1.38 
  -3  -7   5   45.93    2.81 
  -3  -7   5   46.05    2.97 
  -3  -7   4   29.50    2.75 
  -3  -7   4   34.82    2.73 
  -3  -7   4   28.90    2.39 
  -3  -7   4   27.74    2.04 
  -3  -7   3   25.32    2.14 
  -3  -7   2  112.05    5.74 
  -3  -7   1   10.59    2.51 
  -3  -7   0    7.86    2.68 
  -3  -7   0    9.55    2.50 
  -3  -7  -1  114.60    6.01 
  -3  -7  -1  104.93    5.91 
  -3  -7  -1  111.81    5.54 
  -3  -7  -2    4.76    2.46 
  -3  -7  -2    5.59    2.07 
   3  -7   2    6.53    1.75 
  -3  -7  -2    5.57    1.74 
  -3  -7  -3   10.42    2.45 
  -3  -7  -3   14.92    2.05 
   3  -7   3   14.83    1.74 
  -3  -7  -3   15.10    2.27 
   3  -7   3   10.13    2.26 
   3  -7   4    3.51    1.78 
  -3  -7  -4    4.48    2.08 
   3  -7   4    3.65    1.24 
  -3  -7  -4    9.09    1.96 
  -3  -7  -4    3.75    1.62 
   3  -7   5   36.49    2.36 
  -3  -7  -5   33.81    2.56 
   3  -6 -11   48.86    3.13 
  -3  -6  10  167.52    7.25 
  -3  -6  10  177.08    7.50 
  -3  -6  10  166.30    7.34 
   3  -6 -10  168.72    7.90 
  -3  -6   9   10.28    1.93 
  -3  -6   9   15.18    2.10 
  -3  -6   9   17.76    2.18 
  -3  -6   8    5.57    2.19 
  -3  -6   8    5.87    2.13 
  -3  -6   8    4.93    2.09 
  -3  -6   7  111.94    6.13 
  -3  -6   7  114.10    6.01 
   3  -6  -7  125.39    6.17 
  -3  -6   7  118.30    6.56 
  -3  -6   6  146.25    7.56 
  -3  -6   6  167.34    8.29 
  -3  -6   5    5.62    3.46 
  -3  -6   4   34.64    4.33 
  -3  -6   3   -1.32    2.77 
  -3  -6   3    1.23    2.14 
  -3  -6   3    1.79    3.56 
  -3  -6   2    0.81    2.39 
  -3  -6   2    5.59    2.89 
  -3  -6   2    2.92    3.89 
  -3  -6   1   26.12    3.73 
  -3  -6   1   24.99    4.05 
  -3  -6   1   26.73    3.42 
   3  -6  -1   26.22    3.07 
  -3  -6   0   23.52    3.60 
  -3  -6   0   22.89    3.50 
   3  -6   1   12.43    2.70 
  -3  -6  -1   15.09    3.58 
  -3  -6  -1   14.28    3.30 
  -3  -6  -2  144.31    7.83 
  -3  -6  -2  144.21    7.92 
  -3  -6  -3   28.07    4.15 
  -3  -6  -3   25.74    3.98 
  -3  -6  -4   19.18    3.71 
  -3  -6  -4   23.44    3.72 
  -3  -6  -5  132.27    6.79 
   3  -6   5  127.61    6.76 
  -3  -6  -5  133.67    7.40 
   3  -6   6   46.21    3.37 
  -3  -6  -6   44.35    3.66 
   3  -6   6   43.79    3.84 
   3  -6   7   42.76    3.02 
   3  -6   7   40.62    3.55 
  -3  -6  -7   34.11    3.78 
  -3  -6  -7   39.95    4.14 
   3  -6   8   45.64    2.92 
  -3  -6  -8   37.58    3.63 
  -3  -6  -8   37.33    3.40 
   3  -6   8   49.52    3.34 
  -3  -6  -9    8.08    2.21 
   3  -6   9   10.40    1.87 
   3  -6   9    6.67    1.67 
   3  -6   9    9.52    1.81 
  -3  -6  -9    6.53    2.13 
  -3  -6 -10   56.96    3.70 
   3  -6  10   70.66    3.36 
   3  -6  10   71.15    3.44 
   3  -6  10   81.99    3.50 
  -3  -6 -10   64.74    4.02 
   3  -6  10   69.29    3.45 
  -3  -5  14   29.59    1.96 
   3  -5 -14   31.23    2.66 
   3  -5 -14   26.78    2.33 
  -3  -5  13   11.75    2.02 
   3  -5 -13    8.32    2.39 
  -3  -5  12   89.29    4.89 
   3  -5 -12   81.10    5.02 
  -3  -5  12   84.82    4.52 
  -3  -5  12   82.89    4.29 
  -3  -5  11   38.22    3.61 
  -3  -5  11   40.74    3.24 
  -3  -5  11   35.49    3.16 
   3  -5 -11   34.32    3.47 
  -3  -5  11   34.28    2.95 
  -3  -5  10   11.86    3.25 
   3  -5 -10   10.99    2.64 
  -3  -5  10   13.12    2.82 
  -3  -5  10    7.40    2.55 
  -3  -5  10   13.78    2.71 
  -3  -5   9  260.81   12.15 
   3  -5  -9  277.12   12.04 
  -3  -5   9  270.38   12.12 
  -3  -5   9  267.93   12.13 
  -3  -5   9  267.23   12.46 
   3  -5  -8  110.93    5.98 
  -3  -5   8  115.74    6.61 
  -3  -5   8  126.12    7.05 
  -3  -5   8  113.43    6.43 
  -3  -5   8  116.86    7.28 
  -3  -5   7  127.22    6.96 
  -3  -5   7  126.19    7.66 
  -3  -5   6  308.36   14.16 
  -3  -5   5  171.57    9.25 
  -3  -5   5  168.65    8.25 
  -3  -5   4   43.91    4.21 
  -3  -5   4   39.45    4.90 
  -3  -5   4   46.13    3.93 
  -3  -5   3   35.28    3.80 
  -3  -5   3   33.81    4.40 
  -3  -5   2  335.19   15.72 
  -3  -5   2  351.55   15.44 
  -3  -5   2  358.79   15.49 
  -3  -5   1  162.50    8.48 
  -3  -5   1  160.86    8.41 
  -3  -5   0  166.12    8.57 
  -3  -5   0  161.15    8.63 
  -3  -5  -1   87.67    5.93 
  -3  -5  -1   91.29    5.38 
  -3  -5  -1   84.95    5.93 
  -3  -5  -2   96.67    5.90 
  -3  -5  -2  104.97    6.61 
  -3  -5  -3   11.45    3.79 
  -3  -5  -3   12.24    3.18 
   3  -5   3   15.30    2.81 
  -3  -5  -4  471.44   20.25 
  -3  -5  -4  477.00   20.72 
   3  -5   4  470.53   19.89 
  -3  -5  -5   13.45    3.73 
  -3  -5  -5   24.56    3.22 
  -3  -5  -5   24.30    4.29 
   3  -5   5   21.73    2.77 
  -3  -5  -6    6.75    3.39 
  -3  -5  -6   11.03    2.98 
   3  -5   6    4.69    2.91 
   3  -5   6    7.36    2.26 
   3  -5   7  124.55    6.19 
   3  -5   7  125.21    6.62 
  -3  -5  -7  114.00    6.79 
  -3  -5  -7  120.87    6.18 
  -3  -5  -7  126.69    7.29 
   3  -5   7  114.41    6.97 
  -3  -5  -8   53.53    4.98 
  -3  -5  -8   61.03    4.12 
  -3  -5  -8   61.47    5.63 
   3  -5   8   66.66    4.41 
   3  -5   8   70.26    5.02 
   3  -5   8   66.09    3.98 
  -3  -5  -8   69.94    5.05 
   3  -5   9   91.83    4.83 
  -3  -5  -9   92.81    5.94 
  -3  -5  -9   84.96    5.11 
  -3  -5  -9   87.41    6.33 
   3  -5   9  110.33    5.95 
   3  -5   9   94.58    5.27 
  -3  -5  -9  104.24    6.32 
  -3  -5 -10   25.85    2.83 
  -3  -5 -10   29.92    4.16 
   3  -5  10   33.74    3.23 
  -3  -5 -10   33.26    3.93 
   3  -5  10   33.10    3.07 
   3  -5  10   28.57    2.23 
   3  -5  11   40.88    3.00 
   3  -5  11   40.23    2.91 
  -3  -5 -11   34.84    3.00 
   3  -5  11   35.50    3.02 
  -3  -5 -11   36.03    3.97 
  -3  -5 -12   42.37    2.85 
  -3  -5 -12   48.39    3.61 
   3  -5  12   46.01    2.67 
  -3  -5 -12   39.17    2.97 
  -3  -5 -12   39.91    3.45 
   3  -5  12   43.98    2.67 
   3  -5  12   41.84    2.31 
   3  -5  13   12.93    1.22 
  -3  -5 -13   13.00    1.97 
   3  -5  13   14.37    1.24 
  -3  -4  16   72.61    3.29 
   3  -4 -16   64.23    3.67 
   3  -4 -16   62.63    3.92 
  -3  -4  15   32.52    2.46 
   3  -4 -15   23.93    3.48 
   3  -4 -15   31.09    3.15 
   3  -4 -14   32.38    3.09 
   3  -4 -14   30.19    3.56 
  -3  -4  14   29.64    2.87 
  -3  -4  14   27.67    2.28 
   3  -4 -13    6.71    3.23 
  -3  -4  13    7.24    2.38 
   3  -4 -13    9.52    2.64 
  -3  -4  13   12.12    2.98 
  -3  -4  13    6.58    2.17 
   3  -4 -12   13.36    2.64 
  -3  -4  12   15.06    2.82 
  -3  -4  12   12.21    3.02 
   3  -4 -12   17.73    3.25 
  -3  -4  12   15.65    2.53 
  -3  -4  12   13.75    2.04 
  -3  -4  12   15.35    2.79 
  -3  -4  11   57.38    4.15 
  -3  -4  11   60.05    4.35 
   3  -4 -11   52.92    3.97 
  -3  -4  11   52.04    4.16 
  -3  -4  11   57.96    4.66 
  -3  -4  10  103.00    5.99 
  -3  -4  10   99.12    5.92 
  -3  -4  10  105.88    5.94 
   3  -4 -10   93.71    5.38 
  -3  -4  10  107.91    6.52 
  -3  -4   9  284.99   12.91 
  -3  -4   9  282.71   12.88 
  -3  -4   9  282.87   13.09 
  -3  -4   8   80.11    6.21 
  -3  -4   8   92.45    5.54 
  -3  -4   8   82.18    5.56 
  -3  -4   8   88.33    6.16 
  -3  -4   7   55.90    3.88 
  -3  -4   6   91.88    5.14 
  -3  -4   6   74.43    5.65 
  -3  -4   5    8.21    2.72 
  -3  -4   5    9.60    3.71 
  -3  -4   5    5.98    2.72 
  -3  -4   4   76.41    5.31 
  -3  -4   4   75.85    4.92 
  -3  -4   4   68.82    5.03 
  -3  -4   3  151.86    7.58 
  -3  -4   3  131.02    7.55 
  -3  -4   3  153.28    7.57 
  -3  -4   2  155.45    7.61 
  -3  -4   2  145.86    7.57 
  -3  -4   1   62.61    4.54 
  -3  -4   1   70.44    4.24 
  -3  -4   1   66.08    4.49 
  -3  -4   0   17.38    2.86 
  -3  -4   0   22.05    3.26 
  -3  -4  -1  413.28   18.01 
  -3  -4  -1  430.06   17.78 
  -3  -4  -2   95.14    5.43 
  -3  -4  -2   83.95    5.57 
  -3  -4  -2   96.64    5.07 
   3  -4   3   51.68    3.79 
  -3  -4  -3   53.09    3.86 
  -3  -4  -3   50.78    3.41 
  -3  -4  -3   55.09    4.22 
  -3  -4  -4   61.14    4.47 
  -3  -4  -4   54.86    3.68 
  -3  -4  -4   60.91    4.69 
   3  -4   4   52.89    3.87 
  -3  -4  -5  121.42    6.96 
  -3  -4  -5  124.30    6.87 
  -3  -4  -5  119.78    6.33 
   3  -4   5  118.01    6.28 
   3  -4   6   13.04    2.63 
  -3  -4  -6   11.80    3.60 
  -3  -4  -6    5.29    3.49 
  -3  -4  -6   12.47    2.84 
   3  -4   6   12.13    2.96 
   3  -4   7  212.46   10.25 
  -3  -4  -7  234.00   10.64 
  -3  -4  -7  206.98   10.05 
   3  -4   7  195.78   10.44 
   3  -4   7  213.69    9.83 
  -3  -4  -8  199.01   10.16 
   3  -4   8  204.93    9.65 
   3  -4   8  209.51    9.99 
   3  -4   8  198.64    9.30 
  -3  -4  -8  186.23    9.63 
  -3  -4  -9   92.94    6.84 
  -3  -4  -9   83.40    5.02 
  -3  -4  -9   93.81    6.02 
   3  -4   9   95.58    5.85 
   3  -4   9   97.99    5.63 
   3  -4   9   95.94    5.37 
  -3  -4  -9  101.98    6.78 
  -3  -4 -10   59.69    5.69 
  -3  -4 -10   48.69    5.14 
   3  -4  10   64.01    4.67 
   3  -4  10   58.31    4.11 
   3  -4  10   55.32    4.56 
  -3  -4 -10   48.16    3.69 
   3  -4  10   55.37    3.79 
  -3  -4 -10   49.03    4.75 
  -3  -4 -11  247.76   11.80 
   3  -4  11  233.16   10.70 
   3  -4  11  243.50   11.15 
  -3  -4 -11  242.61   11.61 
  -3  -4 -11  229.20   10.81 
   3  -4  11  267.55   11.37 
   3  -4  11  262.38   11.18 
  -3  -4 -12  232.16   10.73 
  -3  -4 -12  233.96   10.96 
   3  -4  12  240.45   10.23 
   3  -4  12  218.18   10.02 
  -3  -4 -12  212.55   10.69 
   3  -4  12  229.07   10.13 
   3  -4  12  224.82    9.74 
  -3  -4 -12  208.25    9.89 
  -3  -4 -13   38.03    3.92 
  -3  -4 -13   44.51    2.97 
  -3  -4 -13   46.61    4.34 
   3  -4  13   44.64    3.08 
   3  -4  13   44.73    2.99 
   3  -4  13   40.21    2.55 
   3  -4  13   42.73    3.05 
  -3  -4 -13   35.18    3.55 
  -3  -4 -13   41.03    3.88 
  -3  -4 -14    9.99    2.27 
  -3  -4 -14    8.52    2.47 
   3  -4  14    4.81    1.37 
   3  -4  14    5.70    1.48 
  -3  -3  17   36.24    2.28 
   3  -3 -17   33.46    3.04 
   3  -3 -17   34.95    3.16 
   3  -3 -16   15.40    2.46 
   3  -3 -16   14.32    3.24 
  -3  -3  16   18.09    2.25 
   3  -3 -16   20.18    3.17 
  -3  -3  16   12.75    1.49 
   3  -3 -15    9.18    2.64 
   3  -3 -15    0.95    3.65 
   3  -3 -15    9.05    3.27 
  -3  -3  15    7.91    2.43 
  -3  -3  15    3.02    1.67 
  -3  -3  14  137.39    6.49 
   3  -3 -14  128.97    7.20 
  -3  -3  14  131.98    6.86 
   3  -3 -14  123.25    6.81 
   3  -3 -13  119.73    6.45 
   3  -3 -13  117.72    6.79 
  -3  -3  13  123.77    6.68 
   3  -3 -13  112.11    5.93 
  -3  -3  13  119.67    6.54 
  -3  -3  13  122.57    6.29 
   3  -3 -12  125.50    6.22 
  -3  -3  12  138.57    6.84 
  -3  -3  12  124.87    6.07 
   3  -3 -12  118.66    6.58 
  -3  -3  12  119.35    6.58 
  -3  -3  12  137.39    7.15 
   3  -3 -11  108.11    5.66 
  -3  -3  11  112.81    6.12 
  -3  -3  11  102.04    5.97 
   3  -3 -11   97.18    5.21 
  -3  -3  11  102.28    5.96 
  -3  -3  11  107.18    6.27 
  -3  -3  10   16.57    3.39 
  -3  -3  10   12.90    2.98 
  -3  -3  10   20.14    3.26 
  -3  -3  10   19.85    3.21 
   3  -3 -10   11.18    2.32 
   3  -3 -10   14.15    2.02 
  -3  -3   9   23.95    3.52 
  -3  -3   9   25.18    3.11 
  -3  -3   9   27.37    3.50 
  -3  -3   8  233.35   10.76 
  -3  -3   8  242.23   10.72 
  -3  -3   8  224.82   10.53 
  -3  -3   7  226.01   10.11 
  -3  -3   6   85.60    5.62 
   3  -3  -6   94.71    6.19 
  -3  -3   6   94.12    6.86 
  -3  -3   6  102.64    5.26 
  -3  -3   6  105.07    5.61 
  -3  -3   5   18.46    2.76 
  -3  -3   5   19.42    2.62 
  -3  -3   5   14.51    2.43 
   3  -3  -5   18.58    3.22 
  -3  -3   5   14.68    3.44 
   3  -3  -5   19.74    2.55 
  -3  -3   5   16.01    2.64 
   3  -3  -4 1259.87   55.09 
   3  -3  -4 1282.29   53.75 
  -3  -3   4 1342.75   53.14 
  -3  -3   4 1262.49   56.18 
  -3  -3   4 1363.75   55.54 
  -3  -3   4 1360.92   53.12 
   3  -3  -4 1411.30   55.17 
  -3  -3   4 1424.59   55.19 
   3  -3  -3  959.66   44.34 
   3  -3  -3 1044.34   43.16 
   3  -3  -3 1089.40   44.55 
  -3  -3   3 1112.09   42.86 
  -3  -3   3 1012.88   44.98 
  -3  -3   3 1104.18   45.85 
  -3  -3   3 1096.65   42.88 
  -3  -3   3 1154.80   44.85 
   3  -3  -2  463.78   20.66 
  -3  -3   2  494.37   19.31 
   3  -3  -2  492.02   20.91 
   3  -3  -2  440.57   19.15 
  -3  -3   2  485.85   22.06 
   3  -3  -2  473.14   19.96 
  -3  -3   2  453.98   19.31 
  -3  -3   2  504.87   21.10 
   3  -3  -1 1520.31   60.43 
  -3  -3   1 1661.10   61.02 
   3  -3  -1 1285.42   59.09 
   3  -3  -1 1581.87   60.76 
  -3  -3   1 1613.69   59.10 
   3  -3  -1 1320.94   58.99 
  -3  -3   1 1675.77   59.34 
   3  -3  -1 1651.03   60.00 
  -3  -3   0  184.65    8.06 
  -3  -3   0  173.23    7.69 
   3  -3   0  173.38    8.60 
   3  -3   0  147.93    8.06 
   3  -3   0  177.01    8.11 
  -3  -3   0  185.63    7.85 
  -3  -3   0  181.25    9.24 
   3  -3   0  185.84    8.45 
   3  -3   1   70.61    4.15 
  -3  -3  -1   71.43    5.55 
   3  -3   1   70.85    5.06 
  -3  -3  -1   65.47    3.80 
  -3  -3  -1   70.20    3.71 
   3  -3   1   54.44    4.01 
  -3  -3  -1   63.41    3.42 
  -3  -3  -1   73.09    4.84 
   3  -3   1   63.98    3.99 
  -3  -3  -2  652.21   25.00 
  -3  -3  -2  602.36   25.17 
  -3  -3  -2  625.83   25.13 
  -3  -3  -2  603.61   26.40 
   3  -3   2  607.76   26.80 
  -3  -3  -2  604.41   27.35 
   3  -3   3  106.58    6.98 
  -3  -3  -3  110.81    5.56 
  -3  -3  -3  113.08    7.48 
  -3  -3  -3  114.16    5.38 
  -3  -3  -4  108.40    5.27 
  -3  -3  -4  101.75    5.50 
   3  -3   4  102.14    5.25 
   3  -3   5   80.05    4.41 
  -3  -3  -5   77.42    4.47 
  -3  -3  -5   77.14    4.15 
  -3  -3  -5   74.62    4.70 
  -3  -3  -6  177.27    8.16 
  -3  -3  -6  180.08    8.51 
   3  -3   6  188.57    8.34 
  -3  -3  -6  194.60    8.90 
   3  -3   6  169.58    8.49 
  -3  -3  -6  171.46    7.95 
  -3  -3  -7  111.58    5.49 
   3  -3   7  103.75    5.99 
  -3  -3  -7  116.06    6.23 
   3  -3   7  111.70    5.84 
   3  -3   7   98.22    6.19 
  -3  -3  -8  171.78    8.17 
   3  -3   8  181.86    8.42 
   3  -3   8  174.77    8.48 
  -3  -3  -8  176.90    8.88 
   3  -3   8  167.17    8.75 
  -3  -3  -9  149.02    7.39 
   3  -3   9  149.33    7.74 
   3  -3   9  154.15    7.63 
  -3  -3  -9  154.73    7.79 
   3  -3   9  148.66    8.03 
  -3  -3  -9  155.64    8.31 
  -3  -3 -10  317.50   14.20 
  -3  -3 -10  339.06   14.61 
  -3  -3 -10  333.25   15.15 
   3  -3  10  298.81   14.35 
   3  -3  10  323.23   14.58 
  -3  -3 -10  343.04   15.01 
   3  -3  10  321.94   14.34 
   3  -3  10  324.23   14.19 
   3  -3  10  339.52   14.57 
   3  -3  11   33.22    3.24 
   3  -3  11   29.85    3.76 
   3  -3  11   35.36    3.96 
  -3  -3 -11   28.13    4.55 
  -3  -3 -11   37.09    3.58 
  -3  -3 -11   27.80    4.04 
   3  -3  11   29.94    3.79 
  -3  -3 -11   30.05    4.61 
  -3  -3 -12  109.95    7.09 
   3  -3  12  104.96    6.27 
   3  -3  12  112.71    6.13 
  -3  -3 -12  104.60    6.11 
   3  -3  12  112.04    5.78 
  -3  -3 -12  104.95    6.72 
   3  -3  12  113.99    6.19 
   3  -3  12  110.07    6.13 
  -3  -3 -13   74.79    4.88 
   3  -3  13   76.94    4.79 
  -3  -3 -13   75.35    5.52 
   3  -3  13   78.08    4.24 
  -3  -3 -13   72.86    5.88 
  -3  -3 -13   85.89    5.54 
   3  -3  13   78.33    4.74 
   3  -3  13   76.12    4.77 
   3  -3  14   52.01    3.55 
  -3  -3 -14   56.92    4.79 
   3  -3  14   50.88    3.48 
  -3  -3 -14   61.68    4.45 
   3  -3  14   55.53    2.99 
  -3  -3 -14   49.62    3.76 
  -3  -3 -14   50.02    4.17 
  -3  -3 -15   34.86    2.78 
   3  -3  15   41.93    2.57 
  -3  -3 -15   33.56    2.90 
   3  -3  15   41.12    2.58 
  -3  -3 -15   40.37    3.45 
  -3  -3 -15   39.00    3.65 
  -3  -3 -15   41.15    3.49 
  -3  -3 -16   15.89    2.18 
   3  -3  16   18.96    1.39 
   3  -2 -18   22.21    2.27 
   3  -2 -18   19.53    2.37 
  -3  -2  18   21.69    1.71 
   3  -2 -18   15.05    2.43 
   3  -2 -17  113.41    6.23 
  -3  -2  17  109.55    5.18 
   3  -2 -17  113.82    6.35 
   3  -2 -16  214.33   10.75 
  -3  -2  16  233.71   10.26 
  -3  -2  16  235.67    9.94 
   3  -2 -15  100.17    6.25 
  -3  -2  15  102.90    5.66 
   3  -2 -15   98.05    5.77 
  -3  -2  15   95.37    5.22 
  -3  -2  14    9.29    2.93 
  -3  -2  14    8.57    3.06 
   3  -2 -14    8.75    4.13 
   3  -2 -14   10.48    3.49 
   3  -2 -14    9.42    2.95 
  -3  -2  14    7.15    2.34 
  -3  -2  13  190.09    9.54 
   3  -2 -13  203.88    9.35 
  -3  -2  13  198.76    9.27 
   3  -2 -13  194.43    9.66 
   3  -2 -12   80.30    4.33 
  -3  -2  12   73.84    5.00 
  -3  -2  12   70.75    4.27 
   3  -2 -12   79.00    4.68 
  -3  -2  12   70.14    4.89 
  -3  -2  12   75.17    5.18 
  -3  -2  11    4.19    2.50 
  -3  -2  11    1.13    2.07 
  -3  -2  11    3.08    1.62 
  -3  -2  11    7.53    2.60 
   3  -2 -11    2.98    1.74 
   3  -2 -11    1.51    2.07 
  -3  -2  11    4.36    2.73 
  -3  -2  10  165.49    7.84 
  -3  -2  10  165.97    8.14 
  -3  -2  10  179.80    8.05 
  -3  -2  10  158.55    7.65 
  -3  -2  10  156.57    7.98 
  -3  -2   9  356.35   15.20 
  -3  -2   9  349.74   15.08 
  -3  -2   9  357.50   15.18 
  -3  -2   9  365.72   15.29 
  -3  -2   8  306.61   14.93 
  -3  -2   8  315.89   13.39 
  -3  -2   8  320.18   13.32 
  -3  -2   8  313.35   13.45 
   3  -2  -8  304.86   15.07 
  -3  -2   7  209.74   10.83 
  -3  -2   7  214.75    9.52 
  -3  -2   7  213.32    9.25 
  -3  -2   7  196.07    9.13 
  -3  -2   7  226.83   10.89 
  -3  -2   7  199.27    9.31 
   3  -2  -6   93.74    6.73 
   3  -2  -6   93.57    4.52 
  -3  -2   6   87.71    4.93 
  -3  -2   6   88.88    4.68 
   3  -2  -5 1320.27   47.84 
  -3  -2   5 1118.19   46.08 
  -3  -2   5 1100.36   48.33 
   3  -2  -5 1121.61   45.75 
  -3  -2   5 1222.73   47.60 
  -3  -2   5 1215.08   47.89 
   3  -2  -5 1226.09   46.04 
   3  -2  -5 1181.72   48.10 
  -3  -2   5 1121.56   45.96 
   3  -2  -4 1468.75   55.96 
  -3  -2   4 1421.06   56.55 
   3  -2  -4 1362.54   54.36 
  -3  -2   4 1529.20   56.27 
  -3  -2   4 1395.55   54.69 
  -3  -2   4 1348.93   56.97 
   3  -2  -4 1380.56   56.42 
  -3  -2   4 1356.57   54.76 
   3  -2  -4 1378.93   54.47 
   3  -2  -3   42.51    3.70 
   3  -2  -3   38.70    3.21 
   3  -2  -3   38.91    2.31 
  -3  -2   3   36.72    3.41 
  -3  -2   3   37.10    4.22 
  -3  -2   3   38.18    4.40 
  -3  -2   2  190.28    8.69 
   3  -2  -2  165.53    7.00 
   3  -2  -2  154.62    7.17 
  -3  -2   2  172.30    9.24 
   3  -2  -2  174.73    8.11 
   3  -2  -2  181.40    8.45 
   3  -2  -1  382.92   16.03 
  -3  -2   1  398.85   16.49 
   3  -2  -1  376.38   15.83 
   3  -2  -1  352.71   15.45 
   3  -2  -1  387.62   16.02 
   3  -2  -1  356.78   15.15 
   3  -2   0  877.28   36.72 
  -3  -2   0  865.39   37.44 
   3  -2   0  931.54   36.22 
   3  -2   0  879.88   36.81 
  -3  -2   0  945.61   37.45 
   3  -2   0  985.31   37.22 
   3  -2   0  917.33   36.06 
   3  -2   0  908.34   36.82 
   3  -2   1 4127.66  156.59 
  -3  -2  -1 4243.98  157.70 
  -3  -2  -1 4015.53  157.77 
   3  -2   1 3868.97  157.20 
   3  -2   1 3932.60  156.12 
   3  -2   1 4029.18  157.10 
   3  -2   1 4071.90  157.31 
   3  -2   1 3795.69  156.65 
   3  -2   1 4087.64  156.07 
   3  -2   2    3.42    1.03 
   3  -2   2    4.30    2.05 
   3  -2   2    2.71    0.55 
   3  -2   2    3.22    1.13 
  -3  -2  -2    1.91    2.05 
  -3  -2  -2    3.56    2.14 
   3  -2   2    3.06    1.76 
   3  -2   2    2.64    0.58 
  -3  -2  -3   28.45    2.29 
  -3  -2  -3   24.35    2.93 
   3  -2   3   31.86    2.44 
  -3  -2  -3   30.80    2.16 
   3  -2   3   27.30    1.69 
  -3  -2  -4  322.26   12.31 
   3  -2   4  309.55   13.00 
  -3  -2  -4  305.95   13.33 
   3  -2   4  301.74   12.25 
   3  -2   4  268.49   11.77 
  -3  -2  -4  315.99   13.96 
  -3  -2  -5  230.04    9.51 
   3  -2   5  222.64    9.54 
  -3  -2  -5  238.57    9.76 
  -3  -2  -5  239.01    9.64 
   3  -2   5  208.34   10.33 
  -3  -2  -5  207.98   11.54 
   3  -2   5  215.09    9.76 
   3  -2   5  216.43    9.67 
  -3  -2  -5  206.97   11.21 
  -3  -2  -5  223.96   10.55 
  -3  -2  -5  214.50   10.72 
  -3  -2  -6   75.97    4.15 
  -3  -2  -6   77.42    4.38 
   3  -2   6   80.29    4.80 
  -3  -2  -6   73.33    4.22 
  -3  -2  -6   73.78    3.98 
  -3  -2  -6   73.75    5.55 
  -3  -2  -6   64.93    4.84 
   3  -2   6   66.91    3.98 
  -3  -2  -6   61.86    4.81 
   3  -2   6   68.86    4.19 
   3  -2   6   72.74    4.00 
   3  -2   7   96.04    5.26 
  -3  -2  -7  101.64    5.40 
  -3  -2  -7   93.00    5.62 
   3  -2   7  104.02    5.20 
   3  -2   7   97.81    5.44 
  -3  -2  -7  104.68    5.29 
  -3  -2  -8  398.84   16.59 
   3  -2   8  381.64   16.48 
   3  -2   8  380.13   16.59 
  -3  -2  -8  387.23   16.67 
  -3  -2  -8  394.51   16.89 
   3  -2   8  401.98   16.47 
  -3  -2  -9  275.00   12.11 
  -3  -2  -9  262.13   12.23 
   3  -2   9  258.87   11.67 
   3  -2   9  255.14   11.87 
  -3  -2  -9  261.44   11.88 
   3  -2   9  266.78   11.82 
   3  -2   9  260.90   11.59 
  -3  -2 -10  280.27   12.61 
  -3  -2 -10  271.04   12.87 
  -3  -2 -10  281.51   12.93 
   3  -2  10  278.51   12.56 
   3  -2  10  263.99   12.46 
   3  -2  10  268.94   12.41 
   3  -2  10  284.48   12.29 
   3  -2  11  148.38    7.75 
  -3  -2 -11  166.44    8.27 
   3  -2  11  153.77    7.72 
  -3  -2 -11  149.97    8.45 
  -3  -2 -11  139.14    8.30 
   3  -2  11  151.52    7.37 
   3  -2  11  140.08    7.71 
   3  -2  11  150.78    7.75 
  -3  -2 -12  303.05   13.97 
  -3  -2 -12  290.69   14.06 
  -3  -2 -12  322.62   14.28 
   3  -2  12  302.53   13.47 
  -3  -2 -12  311.91   14.36 
   3  -2  12  312.16   13.60 
   3  -2  12  286.62   13.09 
   3  -2  12  320.89   13.54 
  -3  -2 -13   87.21    6.26 
  -3  -2 -13   86.48    5.98 
  -3  -2 -13   82.35    6.15 
   3  -2  13   82.75    5.10 
   3  -2  13   78.00    5.14 
   3  -2  13   80.63    4.54 
   3  -2  13   86.07    5.17 
  -3  -2 -13   87.95    6.01 
  -3  -2 -14   30.33    3.36 
   3  -2  14   26.30    2.95 
  -3  -2 -14   30.77    3.96 
  -3  -2 -14   38.97    4.70 
  -3  -2 -14   33.16    4.03 
  -3  -2 -14   31.30    4.41 
   3  -2  14   29.37    3.11 
   3  -2  14   26.30    2.36 
   3  -2  15   29.18    2.60 
  -3  -2 -15   31.05    4.25 
  -3  -2 -15   29.56    3.93 
   3  -2  15   29.08    2.67 
  -3  -2 -15   35.88    3.76 
  -3  -2 -15   26.93    3.30 
  -3  -2 -16  112.24    5.93 
  -3  -2 -16  115.85    6.18 
   3  -2  16  110.24    5.16 
   3  -2  16  116.51    5.22 
  -3  -2 -16  109.12    5.89 
   3  -1 -18   34.02    3.22 
   3  -1 -18   27.47    2.90 
  -3  -1  18   33.74    2.35 
  -3  -1  17  215.62    9.37 
   3  -1 -17  213.29   10.07 
   3  -1 -17  209.89    9.44 
  -3  -1  17  206.26    9.04 
   3  -1 -17  210.10    9.90 
  -3  -1  16   57.57    3.91 
   3  -1 -16   51.06    4.77 
   3  -1 -16   49.49    3.92 
  -3  -1  16   48.57    3.47 
   3  -1 -15   19.47    2.72 
   3  -1 -15   18.90    3.98 
  -3  -1  15   20.49    3.14 
   3  -1 -15   17.83    3.78 
   3  -1 -15   24.18    3.83 
   3  -1 -15   17.57    3.12 
  -3  -1  15   20.23    2.73 
   3  -1 -14  149.36    8.09 
  -3  -1  14  144.26    7.55 
  -3  -1  14  144.94    7.33 
   3  -1 -14  159.58    7.55 
   3  -1 -14  145.60    7.36 
   3  -1 -14  150.45    7.78 
  -3  -1  13  195.55    9.15 
   3  -1 -13  188.97    9.00 
   3  -1 -13  215.40    9.53 
   3  -1 -13  196.15    9.14 
  -3  -1  13  176.99    9.26 
  -3  -1  12  134.93    6.46 
   3  -1 -12  133.95    6.91 
   3  -1 -12  132.09    6.66 
   3  -1 -12  125.44    6.48 
  -3  -1  12  129.29    6.76 
  -3  -1  12  133.08    6.93 
  -3  -1  11   32.11    3.11 
   3  -1 -11   37.29    2.90 
  -3  -1  11   34.09    2.86 
  -3  -1  11   36.58    3.26 
   3  -1 -11   35.19    3.04 
  -3  -1  11   34.56    3.40 
  -3  -1  10  140.34    6.92 
  -3  -1  10  148.73    6.93 
  -3  -1  10  146.40    6.72 
   3  -1 -10  143.20    6.64 
  -3  -1  10  142.19    6.99 
  -3  -1  10  145.11    6.88 
   3  -1 -10  141.49    6.61 
  -3  -1   9   12.62    2.78 
   3  -1  -9   11.26    1.63 
  -3  -1   9    9.68    2.17 
  -3  -1   9    9.39    1.68 
   3  -1  -9   13.13    2.34 
  -3  -1   9    4.62    2.06 
  -3  -1   9   10.65    1.57 
  -3  -1   9    7.80    1.89 
  -3  -1   9   10.97    2.05 
  -3  -1   8  187.18    9.42 
   3  -1  -8  170.11    9.32 
   3  -1  -8  175.14    7.47 
  -3  -1   8  168.13    7.79 
  -3  -1   8  176.06    7.61 
   3  -1  -8  176.47    8.76 
  -3  -1   8  166.34    7.75 
  -3  -1   8  178.54    7.47 
  -3  -1   8  174.26    7.70 
  -3  -1   8  170.08    7.81 
  -3  -1   8  179.27    9.06 
  -3  -1   8  178.06    7.79 
  -3  -1   8  171.11    7.67 
   3  -1  -7  165.72    9.39 
   3  -1  -7  141.12    7.91 
   3  -1  -7  151.19    7.49 
  -3  -1   7  155.41    7.88 
  -3  -1   7  157.64    8.23 
  -3  -1   7  152.17    6.65 
  -3  -1   7  143.65    6.76 
  -3  -1   7  148.80    6.73 
  -3  -1   6  323.50   13.84 
   3  -1  -6  310.33   13.39 
  -3  -1   6  275.94   12.11 
   3  -1  -6  306.41   14.44 
   3  -1  -6  278.36   12.76 
  -3  -1   6  324.14   13.49 
   3  -1  -5 1270.23   50.58 
  -3  -1   5 1353.99   51.25 
  -3  -1   5 1311.89   50.83 
   3  -1  -4   19.72    3.17 
   3  -1  -4   18.43    1.68 
  -3  -1   4   20.97    2.63 
  -3  -1   4   18.36    3.02 
   3  -1  -4   18.60    2.45 
   3  -1  -3 2152.22   83.70 
  -3  -1   3 2090.05   83.77 
  -3  -1   3 2201.45   83.90 
   3  -1  -3 2119.05   82.97 
   3  -1  -3 2136.20   83.17 
   3  -1  -3 2041.81   82.65 
   3  -1  -2   67.23    4.40 
   3  -1  -2   69.55    3.64 
  -3  -1   2   72.13    4.75 
   3  -1  -2   72.13    3.76 
   3  -1  -2   65.21    3.80 
   3  -1  -2   68.03    3.70 
  -3  -1   1 1292.30   52.42 
   3  -1  -1 1333.72   52.22 
   3  -1  -1 1238.07   51.91 
  -3  -1   1 1444.58   52.46 
  -3  -1   1 1308.49   52.63 
   3  -1  -1 1305.47   51.51 
  -3  -1   0  274.78   12.26 
   3  -1   0  269.94   11.93 
   3  -1   0  294.60   12.20 
   3  -1   0  279.15   11.80 
  -3  -1   0  259.19   11.88 
  -3  -1  -1  357.13   15.12 
   3  -1   1  351.55   14.86 
  -3  -1  -1  359.67   14.62 
   3  -1   1  326.86   14.09 
   3  -1   1  318.21   14.39 
   3  -1   1  363.03   14.93 
   3  -1   1  361.72   14.27 
  -3  -1  -2  460.14   19.93 
  -3  -1  -2  468.90   20.53 
   3  -1   2  488.28   20.38 
   3  -1   2  494.35   19.72 
   3  -1   2  487.87   20.26 
   3  -1   2  506.47   19.68 
  -3  -1  -2  461.68   20.16 
   3  -1   3  961.59   38.33 
   3  -1   3  992.52   38.10 
  -3  -1  -3  927.48   38.51 
  -3  -1  -3  916.61   38.39 
  -3  -1  -3  966.65   38.69 
   3  -1   4  421.78   16.94 
   3  -1   4  409.26   17.20 
  -3  -1  -4  362.39   17.88 
  -3  -1  -4  402.52   17.54 
  -3  -1  -4  406.38   17.36 
  -3  -1  -4  415.77   17.65 
  -3  -1  -5  122.00    6.77 
   3  -1   5  114.13    5.89 
   3  -1   5  119.15    6.18 
  -3  -1  -5  125.40    5.56 
  -3  -1  -5  107.99    7.01 
  -3  -1  -5  123.79    5.53 
  -3  -1  -5  111.23    6.37 
  -3  -1  -5  117.51    6.67 
  -3  -1  -5  117.65    5.44 
  -3  -1  -6  435.06   19.47 
  -3  -1  -6  449.62   17.88 
   3  -1   6  439.40   18.82 
  -3  -1  -6  453.94   17.95 
  -3  -1  -6  456.96   19.69 
  -3  -1  -6  413.46   19.86 
   3  -1   6  428.77   17.74 
  -3  -1  -6  429.81   17.64 
  -3  -1  -6  413.98   19.10 
   3  -1   6  423.23   17.85 
  -3  -1  -6  441.61   17.92 
   3  -1   6  433.36   17.71 
   3  -1   6  456.01   18.60 
  -3  -1  -7  305.15   15.27 
  -3  -1  -7  314.13   15.50 
  -3  -1  -7  325.70   13.57 
   3  -1   7  334.31   14.36 
  -3  -1  -7  325.91   13.62 
  -3  -1  -7  279.20   15.63 
   3  -1   7  307.88   13.44 
   3  -1   7  320.79   13.50 
  -3  -1  -7  334.83   13.62 
   3  -1   7  324.51   13.37 
  -3  -1  -7  322.25   13.32 
   3  -1   7  321.06   13.48 
  -3  -1  -7  302.89   14.93 
  -3  -1  -8  117.43    6.12 
   3  -1   8  110.44    6.09 
  -3  -1  -8  120.97    5.80 
  -3  -1  -8  125.37    6.17 
   3  -1   8  117.69    5.96 
   3  -1   8  114.69    5.71 
  -3  -1  -8  113.62    7.37 
  -3  -1  -9  311.69   13.71 
   3  -1   9  320.03   13.50 
  -3  -1  -9  317.89   13.67 
  -3  -1  -9  315.91   13.65 
  -3  -1  -9  319.71   13.31 
   3  -1   9  282.34   13.42 
  -3  -1 -10  137.50    7.29 
   3  -1  10  126.34    6.33 
  -3  -1 -10  125.68    6.94 
   3  -1  10  116.16    6.58 
  -3  -1 -10  127.76    6.54 
  -3  -1 -10  125.12    7.05 
   3  -1  10  138.41    6.66 
  -3  -1 -11  147.83    7.95 
  -3  -1 -11  130.92    7.47 
   3  -1  11  136.40    7.16 
   3  -1  11  138.47    6.83 
   3  -1  11  147.60    7.43 
  -3  -1 -11  139.39    7.09 
  -3  -1 -11  140.20    7.77 
   3  -1  11  137.79    7.27 
   3  -1  12    8.82    2.73 
  -3  -1 -12    8.76    4.00 
  -3  -1 -12    8.04    3.08 
  -3  -1 -12   11.05    2.87 
   3  -1  12    9.90    2.78 
   3  -1  12   13.93    3.03 
  -3  -1 -12    6.75    3.63 
   3  -1  12   10.41    2.35 
  -3  -1 -13  270.69   12.57 
  -3  -1 -13  243.52   11.49 
   3  -1  13  278.04   11.58 
  -3  -1 -13  238.92   11.66 
  -3  -1 -13  258.40   12.63 
   3  -1  13  260.20   11.48 
  -3  -1 -13  262.69   12.13 
   3  -1  13  238.55   10.96 
  -3  -1 -14   36.58    4.81 
  -3  -1 -14   28.92    3.44 
   3  -1  14   33.27    3.11 
  -3  -1 -14   28.34    3.94 
  -3  -1 -14   33.64    5.01 
   3  -1  14   28.71    2.46 
   3  -1  14   28.85    3.25 
   3  -1  15   93.99    4.92 
  -3  -1 -15   98.97    6.25 
  -3  -1 -15   88.16    5.46 
   3  -1  15   85.08    4.19 
   3  -1  15   82.13    4.68 
  -3  -1 -16   78.15    5.19 
   3  -1  16   75.05    3.96 
   3  -1  16   80.68    4.02 
  -3  -1 -16   69.22    4.50 
  -3  -1 -17   56.24    3.60 
   3  -1  17   51.25    2.61 
   3   0 -19  103.20    5.09 
  -3   0  19  105.50    4.63 
   3   0 -18  100.01    5.68 
  -3   0  18  100.13    4.88 
   3   0 -18  106.42    5.44 
   3   0 -17   31.63    3.54 
  -3   0  17   34.91    3.10 
   3   0 -17   34.47    3.51 
   3   0 -17   28.34    3.09 
   3   0 -17   34.31    3.87 
  -3   0  17   34.93    2.66 
   3   0 -16  176.14    9.17 
  -3   0  16  179.73    8.42 
   3   0 -16  174.38    8.90 
   3   0 -16  185.53    9.03 
   3   0 -16  177.03    8.68 
  -3   0  16  176.82    8.17 
   3   0 -15   40.35    4.40 
  -3   0  15   35.30    3.77 
   3   0 -15   41.71    4.19 
   3   0 -15   42.49    3.90 
  -3   0  15   36.37    3.20 
   3   0 -15   35.42    3.98 
   3   0 -14  101.27    6.27 
  -3   0  14  101.73    5.79 
   3   0 -14  104.86    6.12 
  -3   0  14  105.38    5.57 
   3   0 -14  109.26    6.01 
   3   0 -14   92.90    6.19 
  -3   0  13  358.98   15.86 
  -3   0  13  387.94   15.90 
   3   0 -13  368.10   15.53 
   3   0 -13  359.90   16.03 
   3   0 -13  379.36   15.99 
  -3   0  12   33.53    2.46 
  -3   0  12   32.54    3.17 
  -3   0  12   27.91    3.13 
   3   0 -12   27.90    2.56 
   3   0 -12   31.18    3.14 
   3   0 -12   32.34    3.31 
  -3   0  11   81.84    4.57 
  -3   0  11   76.66    3.98 
  -3   0  11   71.31    4.48 
   3   0 -11   70.40    4.02 
   3   0 -11   72.82    4.41 
   3   0 -11   75.95    4.48 
  -3   0  10  600.37   23.26 
   3   0 -10  571.55   23.40 
  -3   0  10  558.39   23.53 
  -3   0  10  592.24   23.64 
   3   0 -10  576.09   23.23 
   3   0 -10  558.83   23.40 
  -3   0  10  593.73   23.65 
  -3   0  10  568.12   23.50 
   3   0  -9  341.87   14.07 
  -3   0   9  357.03   14.22 
  -3   0   9  338.32   14.53 
  -3   0   9  351.45   15.58 
   3   0  -9  324.53   16.00 
   3   0  -9  349.69   14.17 
   3   0  -9  375.72   18.64 
  -3   0   9  352.68   14.57 
   3   0  -9  336.27   14.32 
  -3   0   9  348.82   14.46 
  -3   0   9  349.96   14.42 
   3   0  -8  201.02   11.36 
   3   0  -8  170.28    9.08 
  -3   0   8  181.60    7.77 
  -3   0   8  185.40    8.00 
  -3   0   8  179.72    7.91 
  -3   0   8  178.44    7.63 
   3   0  -8  178.55    7.55 
  -3   0   8  181.79    8.78 
   3   0  -8  203.94   12.20 
  -3   0   8  162.34    7.78 
  -3   0   7  292.14   12.41 
   3   0  -7  298.69   13.56 
  -3   0   7  299.17   12.44 
  -3   0   7  334.91   14.23 
  -3   0   7  292.89   13.63 
   3   0  -7  316.55   15.21 
  -3   0   7  311.29   13.32 
   3   0  -7  324.67   15.92 
  -3   0   7  284.18   12.26 
  -3   0   6  472.07   19.60 
   3   0  -6  402.52   19.08 
   3   0  -6  435.42   19.13 
   3   0  -6  453.22   20.61 
   3   0  -6  476.14   20.39 
  -3   0   6  455.93   18.83 
   3   0  -5 1683.10   67.08 
  -3   0   5 1674.89   65.99 
  -3   0   5 1766.98   66.69 
   3   0  -5 1617.25   66.27 
   3   0  -5 1656.46   66.25 
   3   0  -5 1644.50   67.12 
   3   0  -5 1634.14   65.97 
   3   0  -4 1137.12   45.17 
   3   0  -4 1140.05   44.89 
   3   0  -4 1179.75   45.67 
  -3   0   4 1168.03   44.95 
  -3   0   3 2257.17   88.22 
   3   0  -3 2252.89   88.32 
   3   0  -3 2229.46   88.12 
   3   0  -3 2224.07   88.41 
  -3   0   2  434.69   17.94 
   3   0  -2  399.78   17.73 
   3   0  -2  421.30   17.70 
   3   0  -2  433.88   18.26 
  -3   0   2  467.12   18.22 
  -3   0   1  272.09   11.72 
   3   0  -1  270.49   11.76 
  -3   0   1  262.68   11.86 
   3   0  -1  259.26   11.59 
   3   0  -1  267.02   11.56 
   3   0   0  797.86   36.59 
  -3   0   0  866.37   36.77 
  -3   0   0  821.29   36.48 
  -3   0   0  865.57   36.58 
  -3   0  -1  456.33   19.10 
   3   0   1  579.63   20.31 
  -3   0  -1  497.08   20.05 
   3   0   1  551.29   20.27 
   3   0   2  131.12    6.26 
  -3   0  -2  122.77    5.31 
  -3   0  -2  112.29    5.98 
   3   0   2  123.63    6.17 
   3   0   2  133.43    6.30 
   3   0   3  913.58   35.73 
  -3   0  -3  842.25   34.70 
   3   0   3  912.82   35.39 
  -3   0  -3  839.46   35.57 
   3   0   3  905.58   35.38 
   3   0   4  393.64   16.64 
  -3   0  -4  366.79   16.49 
  -3   0  -4  370.10   16.58 
  -3   0  -5  781.17   31.87 
   3   0   5  797.01   32.74 
   3   0   5  852.97   33.38 
  -3   0  -5  777.83   33.35 
  -3   0  -5  873.10   33.83 
   3   0   6    5.98    1.56 
  -3   0  -6    6.14    1.75 
  -3   0  -6    3.17    1.51 
  -3   0  -6    3.21    1.51 
  -3   0  -6    6.74    1.85 
   3   0   6    2.37    1.68 
   3   0   6    7.07    2.32 
  -3   0  -6    6.56    2.51 
   3   0   6    5.27    1.82 
   3   0   6    6.06    1.77 
   3   0   6    6.50    1.52 
  -3   0  -6    4.78    1.61 
  -3   0  -6    5.04    2.55 
  -3   0  -6    5.46    1.50 
   3   0   6    7.12    1.52 
  -3   0  -7  240.25   11.16 
  -3   0  -7  283.09   11.46 
   3   0   7  277.18   12.38 
  -3   0  -7  279.23   11.50 
   3   0   7  278.24   13.00 
  -3   0  -7  275.33   11.22 
  -3   0  -7  242.60   13.21 
  -3   0  -7  270.53   11.33 
  -3   0  -7  275.69   11.05 
  -3   0  -7  271.73   11.31 
  -3   0  -7  275.24   13.65 
  -3   0  -7  275.94   14.63 
   3   0   7  277.02   12.42 
   3   0   7  243.78   11.17 
   3   0   7  271.77   11.23 
   3   0   7  240.27   11.15 
  -3   0  -8    0.38    2.32 
  -3   0  -8    1.45    2.08 
  -3   0  -8    1.66    2.31 
  -3   0  -8    1.02    1.74 
   3   0   8    2.12    1.71 
  -3   0  -8    1.18    2.21 
  -3   0  -9    5.84    2.94 
  -3   0  -9    6.37    2.16 
   3   0   9    2.74    1.93 
  -3   0  -9    3.36    2.58 
   3   0   9    7.21    2.59 
  -3   0  -9    3.24    2.37 
  -3   0 -10   13.22    3.56 
   3   0  10   14.63    2.96 
   3   0  10   18.36    2.69 
  -3   0 -10   18.53    3.31 
  -3   0 -10   15.89    3.05 
   3   0  10   13.73    2.19 
  -3   0 -11   59.25    5.14 
  -3   0 -11   55.24    4.57 
  -3   0 -11   61.27    4.55 
   3   0  11   58.24    4.45 
   3   0  11   62.78    4.31 
   3   0  11   60.04    4.00 
  -3   0 -12    1.25    3.65 
  -3   0 -12    4.11    2.99 
   3   0  12    3.57    2.31 
  -3   0 -12    4.18    3.89 
   3   0  12    5.12    2.66 
  -3   0 -12    6.71    3.38 
   3   0  12    2.55    1.87 
  -3   0 -12    4.13    2.32 
   3   0  13   14.85    2.19 
  -3   0 -13   10.83    4.42 
  -3   0 -13   12.02    4.12 
  -3   0 -13   10.28    3.41 
  -3   0 -13   13.46    2.97 
   3   0  13   15.53    2.66 
   3   0  13   14.63    3.08 
  -3   0 -14   -5.41    3.81 
  -3   0 -14    6.28    4.03 
  -3   0 -14    7.14    2.87 
   3   0  14    3.36    2.49 
   3   0  14    2.29    2.50 
  -3   0 -14    3.92    3.18 
   3   0  14    0.89    1.65 
  -3   0 -15   17.90    4.05 
  -3   0 -15   25.19    4.00 
   3   0  15   22.42    2.73 
  -3   0 -15   21.44    3.51 
   3   0  15   16.61    1.66 
  -3   0 -16  117.63    6.21 
   3   0  16  111.66    5.38 
  -3   0 -16  111.35    6.44 
   3   0  17   44.05    2.48 
  -3   0 -17   49.33    3.45 
  -3   1  19   53.33    2.50 
   3   1 -19   53.48    3.03 
   3   1 -18   29.07    2.80 
  -3   1  18   31.13    2.39 
  -3   1  18   31.28    2.14 
   3   1 -18   34.08    3.25 
   3   1 -17  202.62    9.74 
  -3   1  17  214.24    9.32 
   3   1 -17  214.15    9.98 
   3   1 -16   50.78    4.39 
  -3   1  16   52.15    3.87 
   3   1 -16   43.63    3.72 
   3   1 -16   55.33    4.67 
   3   1 -16   56.49    4.74 
  -3   1  16   50.64    3.53 
   3   1 -15   22.13    3.85 
  -3   1  15   23.62    2.99 
   3   1 -15   19.55    3.15 
   3   1 -15   20.86    4.08 
   3   1 -15   21.38    3.50 
   3   1 -15   24.83    4.27 
  -3   1  14  165.04    7.77 
  -3   1  14  153.69    7.37 
   3   1 -14  136.20    7.43 
   3   1 -14  153.09    8.00 
   3   1 -14  134.44    6.89 
   3   1 -14  148.91    7.74 
   3   1 -14  150.11    8.00 
   3   1 -13  194.43    9.46 
   3   1 -13  191.71    9.15 
  -3   1  13  201.94    9.36 
   3   1 -13  185.49    8.97 
   3   1 -13  194.87    8.98 
   3   1 -13  182.07    8.64 
  -3   1  13  191.50    8.94 
   3   1 -13  186.34    9.35 
   3   1 -12  132.85    7.10 
   3   1 -12  143.32    7.09 
  -3   1  12  125.05    6.82 
  -3   1  12  134.69    7.08 
   3   1 -12  131.97    6.65 
  -3   1  12  128.14    6.75 
  -3   1  11   36.41    3.19 
   3   1 -11   34.29    3.44 
  -3   1  11   37.69    3.38 
  -3   1  11   35.87    3.63 
   3   1 -11   34.44    3.03 
   3   1 -11   36.83    3.42 
   3   1 -10  122.11    6.51 
  -3   1  10  142.84    6.36 
   3   1 -10  135.73    6.41 
   3   1 -10  125.64    6.56 
   3   1 -10  140.46    6.51 
   3   1 -10  135.16    6.25 
  -3   1  10  133.56    6.62 
  -3   1  10  139.36    6.93 
  -3   1  10  142.13    6.63 
  -3   1   9   12.90    2.22 
  -3   1   9   15.24    2.45 
   3   1  -9    7.43    1.67 
   3   1  -9    9.24    1.63 
  -3   1   9   11.44    1.91 
   3   1  -9    6.67    1.92 
   3   1  -8  153.07    8.94 
  -3   1   8  170.14    7.84 
   3   1  -8  144.04    8.80 
  -3   1   8  181.49    9.00 
   3   1  -8  180.14    7.45 
  -3   1   8  179.63    7.48 
   3   1  -8  165.52    7.35 
  -3   1   8  166.86    7.36 
   3   1  -8  185.18   11.21 
  -3   1   8  168.40    7.58 
  -3   1   8  171.60    7.91 
  -3   1   7  163.78    7.99 
  -3   1   7  151.60    6.75 
   3   1  -7  155.32    8.22 
  -3   1   7  133.06    6.87 
   3   1  -7  166.60    9.76 
   3   1  -7  150.68    6.57 
   3   1  -7  149.35    6.53 
   3   1  -7  158.27    7.89 
  -3   1   7  156.40    6.63 
  -3   1   7  147.77    6.70 
  -3   1   7  155.19    7.06 
  -3   1   6  289.06   12.50 
  -3   1   6  285.23   12.22 
   3   1  -6  289.75   13.18 
   3   1  -6  303.10   13.57 
   3   1  -6  311.91   14.60 
  -3   1   6  315.79   13.33 
   3   1  -5 1322.62   51.35 
  -3   1   5 1254.19   50.38 
  -3   1   5 1290.52   50.96 
   3   1  -5 1340.72   52.11 
   3   1  -5 1274.90   51.04 
   3   1  -5 1194.88   51.18 
  -3   1   4   19.51    1.98 
   3   1  -4   19.22    2.54 
   3   1  -4   17.86    2.60 
   3   1  -3 2229.67   84.75 
  -3   1   3 2093.26   84.05 
   3   1  -2   72.25    4.45 
  -3   1   2   69.63    3.99 
  -3   1   2   72.73    4.47 
   3   1  -1 1381.71   53.69 
   3   1  -1 1348.16   53.79 
   3   1  -1 1316.01   53.90 
  -3   1   1 1361.01   53.82 
  -3   1   0  252.94   11.95 
   3   1   0  300.83   12.01 
   3   1   0  294.11   12.13 
   3   1   0  302.54   12.54 
   3   1   0  266.53   12.22 
   3   1   0  289.61   12.49 
   3   1   1  361.30   15.16 
   3   1   1  380.12   15.30 
   3   1   1  354.05   15.70 
  -3   1  -1  335.68   15.28 
   3   1   2  486.70   18.94 
   3   1   2  440.44   18.67 
  -3   1  -2  416.33   17.54 
  -3   1  -2  434.22   18.44 
   3   1   2  493.74   18.84 
   3   1   3  969.95   36.14 
  -3   1  -3  869.57   34.96 
  -3   1  -3  944.78   36.18 
  -3   1  -4  400.76   18.28 
   3   1   4  428.48   18.11 
   3   1   5  120.46    6.22 
   3   1   5  121.65    6.74 
  -3   1  -5  122.09    5.46 
  -3   1  -5  120.99    5.54 
  -3   1  -5  121.37    7.23 
   3   1   5  122.30    5.53 
   3   1   5  122.46    5.62 
   3   1   5  116.86    5.50 
  -3   1  -6  452.27   18.01 
  -3   1  -6  447.13   17.97 
  -3   1  -6  424.72   17.91 
  -3   1  -6  425.84   20.14 
   3   1   6  438.69   19.38 
  -3   1  -6  468.32   17.97 
   3   1   6  440.35   17.82 
  -3   1  -6  453.32   18.01 
   3   1   6  437.28   18.88 
  -3   1  -6  422.78   17.99 
   3   1   6  430.86   18.02 
  -3   1  -6  422.99   19.50 
   3   1   6  441.04   17.93 
   3   1   6  443.72   18.01 
  -3   1  -7  317.55   13.49 
  -3   1  -7  327.86   13.64 
  -3   1  -7  336.96   15.77 
   3   1   7  327.58   13.24 
   3   1   7  297.73   14.80 
   3   1   7  327.60   13.31 
   3   1   7  321.51   13.48 
  -3   1  -7  330.02   13.52 
  -3   1  -7  325.17   13.62 
   3   1   7  315.45   14.48 
   3   1   7  320.45   13.58 
  -3   1  -8  116.49    6.16 
   3   1   8  122.48    5.57 
   3   1   8  111.74    7.03 
  -3   1  -8  117.53    6.10 
  -3   1  -8  119.81    5.93 
   3   1   8  114.19    5.82 
  -3   1  -8  116.27    5.85 
  -3   1  -9  287.40   12.97 
  -3   1  -9  323.17   13.49 
   3   1   9  324.07   12.82 
   3   1   9  308.02   12.72 
   3   1   9  289.53   13.12 
  -3   1  -9  321.41   13.22 
   3   1   9  311.52   13.05 
  -3   1  -9  286.47   13.34 
  -3   1 -10  128.84    7.09 
   3   1  10  136.40    6.06 
  -3   1 -10  123.87    6.80 
   3   1  10  121.70    6.57 
  -3   1 -10  125.98    6.52 
   3   1  10  124.02    6.50 
   3   1  10  131.57    6.34 
  -3   1 -11  143.59    7.19 
   3   1  11  148.87    6.72 
   3   1  11  154.12    7.30 
  -3   1 -11  135.02    7.60 
  -3   1 -11  146.99    8.06 
   3   1  11  137.47    7.36 
   3   1  11  145.28    6.93 
  -3   1 -11  145.31    7.93 
  -3   1 -12   12.13    3.55 
  -3   1 -12   13.25    2.52 
   3   1  12    9.14    2.96 
  -3   1 -12    6.18    3.08 
   3   1  12    9.24    1.81 
   3   1  12    5.96    2.43 
  -3   1 -12    5.72    3.95 
   3   1  12    7.14    2.04 
  -3   1 -13  260.67   12.55 
   3   1  13  288.33   11.27 
  -3   1 -13  245.32   12.31 
   3   1  13  255.05   11.32 
  -3   1 -13  259.73   12.57 
  -3   1 -13  258.03   12.15 
   3   1  13  261.21   11.83 
  -3   1 -14   33.14    4.51 
  -3   1 -14   35.01    3.84 
  -3   1 -14   32.95    4.23 
   3   1  14   35.33    3.27 
   3   1  14   29.04    2.35 
  -3   1 -14   34.13    3.60 
  -3   1 -15   90.28    5.50 
   3   1  15   87.24    4.28 
  -3   1 -15   99.12    5.87 
   3   1  15   97.19    4.94 
  -3   1 -15   89.92    5.13 
  -3   1 -15   97.14    5.97 
   3   1  16   76.44    3.88 
  -3   1 -16   66.99    4.55 
  -3   1 -17   49.11    3.03 
   3   1  17   52.11    2.61 
  -3   2  18   23.69    1.61 
   3   2 -18   21.95    2.53 
  -3   2  17  118.58    5.55 
   3   2 -17  128.57    6.59 
   3   2 -16  209.90   10.03 
   3   2 -16  231.75   10.76 
  -3   2  16  234.79    9.78 
   3   2 -15   97.56    5.47 
  -3   2  15   93.76    4.69 
   3   2 -15   93.26    6.11 
   3   2 -15   90.66    5.09 
   3   2 -14    9.72    2.66 
   3   2 -14    8.84    2.43 
   3   2 -14    9.77    3.59 
  -3   2  14    8.09    2.68 
   3   2 -13  189.52    9.81 
   3   2 -13  178.65    9.18 
  -3   2  13  220.12    9.49 
   3   2 -13  183.75    9.44 
   3   2 -13  196.43    9.30 
   3   2 -13  196.10    9.76 
   3   2 -13  219.36    9.75 
  -3   2  13  206.97    9.38 
   3   2 -12   66.64    5.05 
   3   2 -12   71.43    4.97 
   3   2 -12   65.22    4.51 
  -3   2  12   88.69    4.99 
   3   2 -12   73.02    4.14 
   3   2 -12   70.81    4.99 
  -3   2  12   87.41    4.92 
   3   2 -12   83.54    5.31 
   3   2 -12   77.85    4.78 
   3   2 -11    4.03    2.66 
   3   2 -11    3.47    2.95 
   3   2 -11    3.32    2.79 
  -3   2  11    8.39    2.60 
  -3   2  11    2.58    3.39 
   3   2 -11    2.61    1.85 
   3   2 -11    4.62    2.69 
  -3   2  11    4.45    1.53 
  -3   2  10  163.03    7.77 
  -3   2  10  163.57    8.19 
   3   2 -10  163.65    7.81 
  -3   2  10  164.55    7.25 
   3   2 -10  167.29    7.75 
   3   2 -10  162.03    7.89 
   3   2 -10  153.97    7.59 
   3   2  -9  339.31   15.01 
  -3   2   9  380.07   15.15 
   3   2  -9  346.16   14.86 
  -3   2   9  367.43   15.38 
   3   2  -9  352.24   15.01 
   3   2  -9  366.16   14.99 
  -3   2   9  353.38   14.65 
   3   2  -9  366.89   15.00 
  -3   2   9  351.45   15.03 
   3   2  -8  309.37   12.99 
   3   2  -8  281.15   14.48 
  -3   2   8  311.39   13.12 
  -3   2   8  322.56   13.34 
  -3   2   8  320.23   13.13 
  -3   2   8  303.99   12.70 
   3   2  -8  304.96   12.92 
   3   2  -8  311.82   12.92 
   3   2  -8  311.82   12.81 
  -3   2   8  279.76   14.17 
  -3   2   7  212.73    9.22 
   3   2  -7  201.52   10.61 
   3   2  -7  229.51    9.28 
  -3   2   7  216.46    9.59 
   3   2  -7  192.78   10.67 
  -3   2   7  214.31   10.40 
   3   2  -7  211.91    9.23 
  -3   2   7  222.32    9.07 
   3   2  -7  209.89    9.23 
  -3   2   7  212.78    9.46 
  -3   2   7  218.01    9.43 
   3   2  -6   95.26    4.51 
  -3   2   6   89.95    4.76 
   3   2  -6   88.03    5.72 
   3   2  -6   96.13    4.53 
   3   2  -6   96.59    5.78 
  -3   2   6   94.69    4.88 
   3   2  -6   93.49    5.31 
  -3   2   6  106.46    5.53 
   3   2  -6   86.92    6.52 
  -3   2   6   94.70    4.78 
   3   2  -5 1230.08   46.30 
   3   2  -5 1198.62   47.10 
  -3   2   5 1154.58   44.92 
   3   2  -5 1123.10   44.69 
  -3   2   5 1094.94   44.84 
   3   2  -5 1133.99   44.67 
  -3   2   5 1136.95   44.73 
   3   2  -5 1208.90   45.75 
  -3   2   5 1090.47   44.85 
   3   2  -5 1132.31   44.71 
   3   2  -4 1455.39   54.83 
   3   2  -4 1319.21   53.39 
   3   2  -4 1405.96   55.06 
   3   2  -4 1479.95   55.57 
   3   2  -4 1337.21   53.32 
   3   2  -3   37.94    3.87 
   3   2  -3   36.79    3.35 
   3   2  -3   35.91    3.30 
   3   2  -2  177.21    8.33 
   3   2  -2  165.59    8.63 
   3   2  -2  168.45    8.55 
   3   2  -1  382.20   15.58 
   3   2  -1  412.31   16.80 
   3   2  -1  374.02   16.54 
   3   2  -1  381.94   17.01 
   3   2  -1  409.66   17.04 
   3   2   0  971.23   35.42 
   3   2   0  922.42   35.49 
   3   2   0  891.96   35.51 
   3   2   0  888.28   35.06 
  -3   2  -1 3979.22  159.70 
   3   2   1 4307.67  160.63 
   3   2   1 3926.91  160.32 
   3   2   1 4460.20  160.65 
   3   2   1 4157.82  160.48 
  -3   2  -1 3939.72  159.80 
  -3   2  -2    2.24    1.58 
   3   2   2    1.81    1.72 
  -3   2  -2    3.36    1.46 
   3   2   2    3.81    1.75 
   3   2   2    3.99    1.80 
  -3   2  -3   32.02    2.04 
   3   2   3   27.05    2.23 
   3   2   3   25.86    2.87 
   3   2   3   30.40    1.97 
  -3   2  -3   31.26    2.08 
  -3   2  -3   32.98    2.54 
   3   2   3   26.31    2.23 
   3   2   3   27.92    2.92 
  -3   2  -4  312.52   12.71 
  -3   2  -4  295.25   12.57 
   3   2   4  292.32   12.82 
   3   2   4  315.54   12.55 
  -3   2  -4  300.51   12.61 
  -3   2  -4  311.04   13.51 
   3   2   4  306.46   12.55 
   3   2   4  305.70   12.66 
   3   2   4  332.80   14.12 
   3   2   4  312.57   14.01 
  -3   2  -5  228.62    9.72 
   3   2   5  242.18   11.00 
  -3   2  -5  229.55    9.56 
   3   2   5  220.34   10.22 
   3   2   5  232.56    9.59 
  -3   2  -5  222.70   10.65 
   3   2   5  224.82    9.42 
   3   2   5  233.52    9.48 
   3   2   5  216.90    9.71 
  -3   2  -5  224.17    9.66 
   3   2   5  205.72    9.79 
  -3   2  -6   73.92    4.08 
  -3   2  -6   72.77    3.78 
  -3   2  -6   70.57    3.78 
  -3   2  -6   72.15    4.08 
   3   2   6   69.38    3.48 
   3   2   6   81.20    4.44 
   3   2   6   65.05    3.58 
   3   2   6   69.02    3.60 
  -3   2  -6   65.75    3.98 
   3   2   6   70.21    4.16 
  -3   2  -6   76.26    5.90 
   3   2   6   76.09    4.04 
  -3   2  -7  111.75    5.13 
   3   2   7  106.86    5.01 
  -3   2  -7  104.48    5.38 
   3   2   7  109.99    4.87 
  -3   2  -7  102.75    5.46 
   3   2   7  104.78    5.44 
  -3   2  -7   97.14    5.08 
   3   2   7   99.14    4.87 
  -3   2  -7   96.90    5.46 
   3   2   7   90.16    5.12 
  -3   2  -8  373.52   15.98 
  -3   2  -8  376.50   15.86 
  -3   2  -8  391.11   16.18 
   3   2   8  412.41   15.83 
  -3   2  -8  381.61   16.14 
   3   2   8  331.03   15.97 
   3   2   8  402.79   15.64 
  -3   2  -8  379.59   16.28 
   3   2   8  369.10   15.88 
  -3   2  -9  271.43   11.87 
  -3   2  -9  255.06   11.59 
   3   2   9  279.27   11.54 
  -3   2  -9  285.83   12.31 
  -3   2  -9  268.59   12.04 
   3   2   9  267.38   11.62 
   3   2   9  265.35   11.30 
  -3   2 -10  251.89   11.77 
  -3   2 -10  266.52   12.22 
   3   2  10  289.63   11.81 
   3   2  10  279.35   11.93 
  -3   2 -10  282.69   12.44 
  -3   2 -10  285.30   12.71 
  -3   2 -11  153.80    7.69 
  -3   2 -11  153.03    7.89 
   3   2  11  151.61    7.25 
  -3   2 -11  159.79    8.47 
   3   2  11  145.68    7.55 
   3   2  12  304.16   13.09 
  -3   2 -12  278.29   13.24 
  -3   2 -12  318.58   13.96 
   3   2  12  304.91   12.73 
  -3   2 -12  285.11   13.28 
  -3   2 -13   84.87    5.28 
  -3   2 -13   84.94    5.28 
  -3   2 -13   79.99    6.22 
   3   2  13   87.37    5.01 
   3   2  13   86.63    4.47 
  -3   2 -13   83.19    5.88 
   3   2  14   27.83    2.18 
   3   2  14   28.24    2.88 
  -3   2 -14   28.93    4.08 
  -3   2 -14   33.74    3.36 
  -3   2 -14   31.87    3.90 
   3   2  15   25.86    2.33 
  -3   2 -15   30.79    3.26 
   3   2  16  109.89    4.88 
  -3   2 -16  100.66    5.25 
  -3   3  17   39.44    2.16 
   3   3 -17   33.15    2.75 
  -3   3  16   15.83    1.49 
   3   3 -16   18.13    2.33 
   3   3 -16   17.91    2.84 
  -3   3  16   17.83    1.83 
   3   3 -15    4.51    3.11 
  -3   3  15    6.03    1.65 
  -3   3  15    5.21    1.75 
   3   3 -15    8.39    2.44 
  -3   3  14  140.81    6.62 
  -3   3  14  129.57    6.32 
  -3   3  14  128.55    6.36 
   3   3 -14  122.85    6.80 
   3   3 -14  129.53    7.13 
   3   3 -14  123.77    7.27 
  -3   3  13  138.44    6.77 
  -3   3  13  134.43    7.09 
   3   3 -13  117.02    6.22 
   3   3 -13  132.88    7.03 
   3   3 -13  119.35    7.07 
  -3   3  13  127.58    5.76 
  -3   3  13  118.93    6.21 
   3   3 -13  118.57    6.81 
   3   3 -12  141.31    7.33 
  -3   3  12  134.75    6.98 
  -3   3  12  141.19    7.20 
   3   3 -12  132.56    7.45 
   3   3 -12  129.83    6.63 
  -3   3  12  142.03    6.24 
   3   3 -12  133.78    7.19 
  -3   3  12  112.79    6.58 
  -3   3  11  112.39    6.10 
  -3   3  11  101.21    6.25 
   3   3 -11  106.52    5.76 
   3   3 -11  105.86    6.26 
  -3   3  11  108.11    5.29 
   3   3 -11  102.24    6.05 
   3   3 -11  109.87    6.25 
  -3   3  10   18.91    2.96 
  -3   3  10   17.04    3.35 
   3   3 -10   13.54    2.74 
   3   3 -10   14.47    3.24 
  -3   3  10   18.69    2.24 
   3   3 -10   17.06    2.87 
   3   3 -10   17.06    3.17 
  -3   3   9   27.18    3.36 
  -3   3   9   26.80    3.03 
   3   3  -9   24.91    3.11 
   3   3  -9   29.90    2.91 
   3   3  -9   22.63    2.91 
  -3   3   9   27.27    2.35 
   3   3  -8  242.32   10.50 
  -3   3   8  229.42   10.65 
  -3   3   8  232.18   10.77 
  -3   3   8  239.68   10.77 
   3   3  -8  236.04   10.11 
   3   3  -8  241.09   10.61 
  -3   3   8  246.63   10.27 
   3   3  -8  236.38   10.34 
   3   3  -7  241.81   10.46 
  -3   3   7  230.41   10.73 
   3   3  -7  246.38   10.28 
  -3   3   7  251.71   10.42 
   3   3  -7  241.03   10.59 
   3   3  -7  237.14   10.61 
   3   3  -7  242.61   10.32 
  -3   3   7  243.65   10.78 
  -3   3   7  246.90   10.91 
   3   3  -6  106.10    5.18 
  -3   3   6  105.97    5.59 
  -3   3   6   99.68    5.32 
  -3   3   6  103.03    5.45 
   3   3  -6  105.81    4.95 
  -3   3   6  105.41    5.06 
   3   3  -6  107.74    5.14 
   3   3  -6   97.28    4.92 
   3   3  -5   17.24    2.52 
   3   3  -5   18.03    1.69 
  -3   3   5   18.33    1.95 
  -3   3   5   16.57    2.15 
  -3   3   5   18.69    1.53 
   3   3  -5   16.71    2.55 
   3   3  -5   17.65    1.62 
   3   3  -5   17.08    1.86 
   3   3  -5   18.12    1.95 
   3   3  -5   16.67    1.83 
   3   3  -5   18.74    1.62 
  -3   3   5   19.80    2.41 
   3   3  -5   17.90    1.93 
  -3   3   5   18.59    1.52 
   3   3  -4 1397.06   55.06 
  -3   3   4 1299.05   53.69 
   3   3  -4 1314.52   54.98 
  -3   3   4 1387.27   53.46 
   3   3  -4 1330.58   53.51 
   3   3  -4 1386.34   53.66 
  -3   3   4 1405.42   53.66 
   3   3  -4 1351.69   53.53 
   3   3  -4 1355.54   53.59 
   3   3  -4 1337.75   53.61 
   3   3  -4 1408.28   53.53 
  -3   3   4 1314.88   53.72 
  -3   3   4 1385.77   53.46 
  -3   3   3 1041.47   42.65 
   3   3  -3 1043.64   42.46 
   3   3  -3 1099.86   42.65 
  -3   3   3 1084.78   42.59 
   3   3  -3 1161.82   43.59 
   3   3  -3 1073.56   42.43 
   3   3  -3 1121.52   45.15 
  -3   3   3 1081.14   42.43 
   3   3  -3 1090.30   42.55 
   3   3  -3 1105.04   43.96 
   3   3  -3 1108.69   42.52 
  -3   3   3 1027.00   42.59 
  -3   3   2  457.54   18.84 
   3   3  -2  469.35   20.21 
   3   3  -2  469.04   19.18 
   3   3  -2  479.48   18.98 
   3   3  -2  518.52   20.15 
  -3   3   2  464.04   19.13 
   3   3  -2  475.20   18.93 
   3   3  -2  482.61   20.36 
   3   3  -2  501.15   21.48 
  -3   3   2  461.12   18.96 
   3   3  -2  469.65   19.07 
   3   3  -2  479.68   19.02 
  -3   3   2  477.80   19.11 
  -3   3   1 1518.90   63.09 
  -3   3   1 1606.79   63.01 
   3   3  -1 1554.24   63.25 
   3   3  -1 1567.44   63.11 
   3   3  -1 1808.18   64.37 
  -3   3   1 1580.20   63.20 
  -3   3   1 1646.31   63.12 
   3   3  -1 1612.14   63.08 
   3   3  -1 1632.09   64.83 
   3   3  -1 1616.90   63.11 
   3   3  -1 1732.75   65.59 
   3   3  -1 1620.92   63.22 
   3   3  -1 1799.97   64.70 
   3   3  -1 1616.92   64.13 
   3   3   0  175.44    8.36 
   3   3   0  182.33    8.65 
   3   3   0  188.16    9.08 
   3   3   0  183.27    7.86 
  -3   3   0  178.29    7.67 
  -3   3   0  180.42    7.55 
   3   3   0  173.16    7.66 
   3   3   0  170.75    7.50 
   3   3   0  197.21    8.99 
  -3   3   0  175.13    7.55 
   3   3   0  173.37    7.77 
  -3   3   0  182.69    7.66 
   3   3   0  174.95    7.49 
   3   3   0  178.53    9.55 
  -3   3  -1   60.69    3.42 
   3   3   1   70.80    5.11 
  -3   3  -1   67.96    4.37 
  -3   3  -1   68.14    3.58 
  -3   3  -1   71.31    3.44 
   3   3   1   69.59    4.52 
   3   3   1   61.39    3.51 
  -3   3  -1   65.94    3.46 
   3   3   1   70.50    3.23 
   3   3   1   69.10    3.67 
   3   3   1   68.30    4.49 
  -3   3  -1   65.14    3.45 
   3   3   1   72.13    3.79 
   3   3   1   63.61    3.33 
  -3   3  -1   69.86    3.49 
  -3   3  -2  558.19   25.18 
   3   3   2  615.90   24.01 
  -3   3  -2  606.72   24.26 
   3   3   2  568.83   24.30 
  -3   3  -2  617.62   24.13 
   3   3   2  603.93   25.36 
   3   3   2  564.33   24.23 
   3   3   2  622.69   24.26 
  -3   3  -2  623.76   24.20 
  -3   3  -2  580.14   24.08 
  -3   3  -2  621.85   24.23 
   3   3   2  635.93   25.57 
  -3   3  -3  122.27    5.51 
  -3   3  -3  124.86    5.75 
   3   3   3  121.77    5.52 
   3   3   3  114.61    5.75 
   3   3   3  116.35    5.28 
   3   3   3  115.18    5.63 
  -3   3  -3  117.94    5.60 
  -3   3  -3  118.61    5.44 
   3   3   3  110.47    5.70 
  -3   3  -3  118.33    5.66 
  -3   3  -4   98.92    5.06 
  -3   3  -4   96.98    4.85 
  -3   3  -4  105.54    5.26 
   3   3   4  105.33    4.91 
   3   3   4  103.13    5.41 
   3   3   4  109.08    5.15 
  -3   3  -4  110.60    5.00 
   3   3   4  100.78    4.73 
   3   3   5   80.21    3.91 
  -3   3  -5   75.23    4.17 
  -3   3  -5   78.89    4.59 
  -3   3  -5   72.70    4.44 
   3   3   5   71.68    4.52 
   3   3   5   79.38    4.23 
  -3   3  -5   75.01    4.12 
   3   3   5   77.87    3.74 
  -3   3  -5   80.13    4.05 
   3   3   5   67.64    4.37 
  -3   3  -6  180.26    8.55 
   3   3   6  168.89    8.45 
   3   3   6  184.73    8.17 
   3   3   6  192.66    7.84 
  -3   3  -6  172.38    8.20 
   3   3   6  175.58    7.74 
   3   3   6  176.72    8.38 
  -3   3  -6  181.52    8.16 
  -3   3  -6  183.78    8.56 
  -3   3  -7  109.54    5.79 
  -3   3  -7  111.12    5.56 
  -3   3  -7  105.85    5.99 
   3   3   7  115.55    6.02 
   3   3   7  109.68    5.53 
   3   3   7  104.21    5.70 
   3   3   7  109.26    5.06 
  -3   3  -8  181.98    8.22 
  -3   3  -8  186.03    8.85 
   3   3   8  182.77    8.55 
   3   3   8  190.91    8.17 
  -3   3  -8  169.47    8.56 
   3   3   8  160.66    8.25 
  -3   3  -8  169.65    8.83 
  -3   3  -9  142.52    7.16 
   3   3   9  144.65    7.16 
   3   3   9  163.19    7.14 
  -3   3  -9  153.89    8.12 
  -3   3  -9  150.61    7.80 
  -3   3  -9  148.08    7.86 
  -3   3 -10  317.76   14.25 
  -3   3 -10  313.02   13.58 
  -3   3 -10  313.33   14.39 
   3   3  10  329.69   13.65 
  -3   3 -11   37.50    4.48 
  -3   3 -11   32.55    4.18 
   3   3  11   41.16    3.03 
   3   3  12  117.90    5.84 
  -3   3 -12  103.96    6.42 
   3   3  12  112.41    5.46 
  -3   3 -12  101.46    6.41 
  -3   3 -12  113.16    7.17 
  -3   3 -13   82.71    5.64 
   3   3  13   82.61    4.52 
  -3   3 -13   73.48    4.99 
   3   3  13   79.33    4.04 
   3   3  14   55.58    3.20 
  -3   3 -14   55.23    4.48 
   3   3  14   50.82    2.75 
   3   3  15   41.58    2.52 
  -3   3 -15   43.16    3.47 
   3   3  16   17.37    1.23 
  -3   3 -16   15.15    1.79 
  -3   4  16   80.65    3.43 
   3   4 -16   65.94    3.69 
   3   4 -15   28.24    2.79 
  -3   4  15   28.09    2.03 
  -3   4  15   29.98    2.08 
   3   4 -14   25.00    2.52 
   3   4 -14   33.11    3.35 
  -3   4  14   25.26    2.32 
   3   4 -14   26.93    2.78 
  -3   4  14   29.73    2.30 
   3   4 -13    9.33    2.45 
  -3   4  13    6.45    2.27 
   3   4 -13    8.26    2.41 
   3   4 -13   13.70    3.33 
  -3   4  13    7.56    2.04 
  -3   4  13   11.09    1.40 
  -3   4  12   20.59    2.83 
   3   4 -12   21.29    2.97 
  -3   4  12   14.36    1.69 
   3   4 -12   16.71    2.70 
  -3   4  12   16.98    2.73 
  -3   4  11   64.35    4.35 
   3   4 -11   53.05    4.35 
   3   4 -11   54.34    4.30 
   3   4 -11   48.84    3.86 
  -3   4  11   55.39    4.11 
  -3   4  11   58.72    3.44 
   3   4 -10  113.72    6.57 
  -3   4  10  113.83    5.49 
   3   4 -10  111.53    6.43 
  -3   4  10  104.83    5.90 
   3   4 -10  108.37    6.32 
   3   4 -10  102.69    5.98 
  -3   4   9  265.84   12.42 
   3   4  -9  279.01   12.11 
  -3   4   9  290.91   12.24 
   3   4  -9  295.06   12.86 
   3   4  -9  283.98   12.86 
   3   4  -9  296.56   12.88 
   3   4  -9  286.22   12.50 
  -3   4   8   90.94    5.16 
   3   4  -8  102.82    5.78 
   3   4  -8   87.94    4.83 
  -3   4   8  104.81    5.13 
   3   4  -8   97.84    5.53 
   3   4  -8   86.89    5.01 
  -3   4   7   51.97    3.77 
   3   4  -7   56.92    3.64 
  -3   4   7   51.58    3.57 
   3   4  -7   52.99    3.84 
  -3   4   7   61.96    4.39 
  -3   4   7   60.13    3.13 
   3   4  -6   87.43    4.82 
  -3   4   6   85.88    4.77 
  -3   4   6   89.36    4.89 
   3   4  -6   89.58    4.85 
  -3   4   6   86.32    5.24 
  -3   4   6   92.25    4.42 
   3   4  -5   10.58    1.86 
   3   4  -5   11.64    2.21 
   3   4  -5   10.96    1.94 
  -3   4   5    9.69    2.35 
  -3   4   5   12.27    2.89 
   3   4  -5    9.37    2.32 
  -3   4   5   10.64    1.65 
   3   4  -4   73.18    3.99 
   3   4  -4   68.70    3.85 
   3   4  -4   69.72    3.99 
  -3   4   4   63.99    4.00 
   3   4  -4   67.31    3.63 
  -3   4   4   66.08    3.62 
  -3   4   4   59.16    4.32 
   3   4  -4   68.59    3.83 
  -3   4   3  147.62    6.70 
   3   4  -3  161.34    7.15 
   3   4  -3  154.31    7.38 
  -3   4   3  152.63    7.26 
  -3   4   3  145.70    7.37 
   3   4  -3  161.03    7.11 
  -3   4   3  159.10    6.96 
   3   4  -3  155.42    7.08 
   3   4  -2  146.31    6.80 
  -3   4   2  148.83    6.58 
   3   4  -2  146.21    7.00 
   3   4  -2  160.12    7.18 
  -3   4   2  129.86    7.01 
   3   4  -2  155.84    6.93 
  -3   4   2  154.43    6.81 
  -3   4   1   57.66    3.46 
  -3   4   1   59.66    3.34 
   3   4  -1   60.22    3.61 
  -3   4   1   55.98    3.60 
   3   4  -1   65.97    3.52 
   3   4  -1   66.20    3.74 
  -3   4   0   18.14    2.26 
  -3   4   0   19.94    2.16 
  -3   4   0   16.95    1.98 
   3   4   0   20.22    2.65 
   3   4   0   18.89    2.26 
  -3   4   0   20.11    2.23 
   3   4   0   14.39    2.37 
   3   4   0   16.47    1.89 
  -3   4  -1  438.68   17.39 
  -3   4  -1  432.30   17.21 
   3   4   1  406.83   17.42 
   3   4   1  424.59   17.36 
  -3   4  -1  395.29   17.11 
  -3   4  -1  418.37   17.27 
   3   4   1  413.13   17.07 
   3   4   1  422.89   17.51 
   3   4   2   94.91    4.84 
  -3   4  -2   80.68    4.87 
   3   4   2   91.32    4.92 
   3   4   2   87.93    4.89 
  -3   4  -2   85.74    4.62 
  -3   4  -2   91.01    4.62 
   3   4   2   83.53    4.36 
  -3   4  -2   85.47    4.58 
  -3   4  -3   54.20    3.59 
  -3   4  -3   50.40    3.98 
   3   4   3   54.68    3.68 
   3   4   3   57.99    3.92 
  -3   4  -3   55.81    3.76 
   3   4   3   59.34    4.16 
  -3   4  -3   57.53    3.52 
  -3   4  -3   52.39    3.54 
  -3   4  -4   55.48    3.78 
  -3   4  -4   59.35    4.32 
  -3   4  -4   52.39    3.95 
   3   4   4   52.70    3.48 
   3   4   4   60.04    4.27 
  -3   4  -4   58.01    3.83 
  -3   4  -4   57.12    3.63 
  -3   4  -5  113.92    6.12 
  -3   4  -5  125.85    6.83 
   3   4   5  122.63    5.94 
   3   4   5  117.98    6.60 
  -3   4  -5  127.08    6.61 
   3   4   5  113.25    6.33 
  -3   4  -5  132.85    6.20 
  -3   4  -5  125.79    6.52 
   3   4   5  124.65    6.47 
  -3   4  -6   10.48    2.50 
   3   4   6   10.19    2.70 
   3   4   6    8.81    1.84 
  -3   4  -6   14.17    3.18 
   3   4   6    6.84    2.94 
   3   4   6   10.44    1.79 
   3   4   6   10.01    2.63 
  -3   4  -6    8.12    3.00 
  -3   4  -7  207.17    9.63 
  -3   4  -7  224.05   10.52 
   3   4   7  207.10    9.27 
   3   4   7  218.15   10.07 
   3   4   7  233.42    9.85 
   3   4   7  214.03    9.21 
  -3   4  -7  202.81   10.21 
   3   4   7  207.17    9.84 
  -3   4  -7  233.17   10.34 
  -3   4  -8  209.11    9.36 
   3   4   8  197.01    8.80 
   3   4   8  213.91    9.68 
  -3   4  -8  212.50   10.08 
  -3   4  -8  219.22   10.20 
   3   4   8  206.66    8.83 
   3   4   8  204.85    9.40 
  -3   4  -8  194.15   10.08 
  -3   4  -9   92.73    5.08 
   3   4   9   92.92    5.48 
   3   4   9  100.63    5.17 
  -3   4  -9   92.13    6.13 
  -3   4 -10   52.96    3.45 
   3   4  10   55.71    3.61 
  -3   4 -10   59.20    4.91 
  -3   4 -11  240.55   11.56 
   3   4  11  252.84   10.63 
  -3   4 -11  245.44   11.64 
   3   4  12  239.16    9.73 
  -3   4 -12  221.38   10.70 
  -3   4 -12  214.32   10.81 
  -3   4 -13   44.46    3.96 
   3   4  13   42.10    2.73 
  -3   4 -13   45.48    3.59 
   3   4  13   38.81    2.25 
   3   4  14    6.75    1.24 
  -3   4 -14    7.76    2.33 
  -3   5  14   33.43    2.00 
   3   5 -13   10.16    2.03 
   3   5 -13    9.24    2.54 
  -3   5  13    8.93    1.56 
  -3   5  13    9.11    1.60 
  -3   5  12   90.49    4.39 
   3   5 -12   81.94    4.91 
  -3   5  12   83.91    4.52 
   3   5 -12   86.97    5.18 
   3   5 -11   32.51    3.72 
  -3   5  11   39.19    2.43 
   3   5 -11   34.62    3.96 
  -3   5  11   39.50    3.01 
   3   5 -10    9.22    3.11 
   3   5 -10   13.02    3.28 
  -3   5  10   11.39    2.47 
  -3   5  10   11.19    1.81 
  -3   5   9  271.17   11.52 
  -3   5   9  269.56   11.81 
   3   5  -9  258.49   12.19 
   3   5  -8  119.76    6.69 
  -3   5   8  126.53    6.46 
   3   5  -8  116.14    6.05 
  -3   5   8  133.33    6.18 
   3   5  -7  125.45    6.93 
  -3   5   7  132.53    6.02 
  -3   5   7  140.08    6.13 
   3   5  -7  132.77    7.21 
   3   5  -7  132.96    6.61 
  -3   5   7  143.62    6.66 
  -3   5   7  140.89    7.09 
  -3   5   7  116.47    6.92 
  -3   5   6  297.33   12.34 
   3   5  -6  266.95   12.30 
   3   5  -6  297.91   13.12 
   3   5  -6  284.04   12.78 
   3   5  -6  302.71   12.77 
  -3   5   6  288.79   13.02 
  -3   5   6  315.07   13.24 
  -3   5   6  299.64   12.37 
  -3   5   6  304.59   12.78 
   3   5  -5  192.01    8.94 
   3   5  -5  183.19    8.68 
  -3   5   5  161.84    8.74 
   3   5  -5  187.21    8.48 
  -3   5   5  195.12    8.27 
   3   5  -4   44.38    3.54 
  -3   5   4   41.38    3.85 
   3   5  -4   46.37    3.33 
   3   5  -4   45.27    3.67 
   3   5  -4   43.75    3.43 
   3   5  -4   46.07    3.00 
   3   5  -3   41.38    3.19 
  -3   5   3   34.57    2.44 
   3   5  -3   40.63    3.20 
   3   5  -3   30.95    3.54 
  -3   5   3   34.73    3.44 
  -3   5   3   38.50    3.05 
   3   5  -3   34.80    3.06 
   3   5  -3   37.94    3.13 
  -3   5   2  352.25   14.71 
   3   5  -2  357.93   14.72 
   3   5  -2  350.93   14.85 
  -3   5   2  356.75   14.53 
   3   5  -2  332.28   14.87 
  -3   5   2  315.19   14.83 
   3   5  -2  369.70   14.78 
   3   5  -1  147.48    7.05 
  -3   5   1  143.50    7.12 
   3   5  -1  149.69    6.90 
  -3   5   1  148.25    6.96 
   3   5  -1  157.53    7.53 
  -3   5   1  156.81    7.46 
   3   5  -1  154.45    7.40 
   3   5   0  168.66    7.59 
   3   5   0  174.10    7.87 
   3   5   0  167.21    8.37 
   3   5   0  176.84    8.29 
   3   5   0  174.21    8.06 
  -3   5   0  166.89    8.01 
  -3   5   0  172.82    8.27 
   3   5   0  174.29    8.24 
  -3   5  -1   92.31    5.06 
   3   5   1   94.23    5.40 
   3   5   1   84.16    5.07 
   3   5   1   85.87    5.01 
  -3   5  -1   90.73    5.09 
   3   5   1   86.82    4.66 
   3   5   1   86.48    5.29 
  -3   5  -2   85.44    5.41 
  -3   5  -2  109.50    5.73 
   3   5   2  107.29    5.54 
   3   5   2  105.24    5.56 
  -3   5  -2   97.44    5.10 
  -3   5  -2   95.14    5.46 
   3   5   2  106.46    5.05 
   3   5   2  105.40    5.98 
  -3   5  -3   15.33    2.62 
   3   5   3   13.99    2.82 
   3   5   3   11.70    2.42 
   3   5   3   16.41    2.74 
  -3   5  -3   16.73    2.32 
  -3   5  -3   12.73    2.55 
   3   5   3   14.45    1.92 
  -3   5  -3   17.40    3.07 
   3   5   3   17.09    3.02 
  -3   5  -4  475.39   19.70 
   3   5   4  455.43   19.25 
  -3   5  -4  457.00   19.52 
   3   5   4  467.26   19.52 
   3   5   4  496.44   19.76 
   3   5   4  504.08   20.01 
  -3   5  -4  482.81   19.73 
  -3   5  -4  463.43   20.16 
  -3   5  -4  469.77   19.73 
  -3   5  -5   14.82    2.77 
  -3   5  -5   19.79    2.87 
   3   5   5   15.57    2.76 
  -3   5  -5   21.19    3.69 
   3   5   5   16.31    2.51 
   3   5   5   19.52    2.19 
   3   5   5   17.07    1.86 
   3   5   5   24.65    3.24 
  -3   5  -5   18.37    2.53 
  -3   5  -5   19.89    2.51 
  -3   5  -6    2.92    2.18 
  -3   5  -6    3.54    2.21 
  -3   5  -6    9.44    3.73 
   3   5   6    3.36    1.50 
   3   5   6    5.92    2.70 
  -3   5  -6    6.23    2.92 
   3   5   6    2.62    1.83 
   3   5   6    8.47    1.43 
   3   5   6    5.98    2.61 
   3   5   7  115.10    5.50 
   3   5   7  122.16    5.87 
   3   5   7  129.95    6.41 
  -3   5  -7  114.75    6.06 
  -3   5  -7  124.19    6.71 
   3   5   7  122.96    5.48 
   3   5   7  123.89    6.22 
  -3   5  -7  120.18    6.43 
  -3   5  -8   72.46    4.10 
   3   5   8   68.57    3.77 
   3   5   8   68.89    4.40 
  -3   5  -8   64.53    4.86 
  -3   5  -8   63.12    4.56 
   3   5   8   69.23    4.05 
  -3   5  -9   94.40    5.70 
  -3   5  -9   93.52    4.90 
   3   5   9  109.96    5.24 
   3   5   9   98.68    4.62 
  -3   5  -9   91.14    5.77 
   3   5   9   98.89    4.94 
   3   5  10   27.83    2.41 
   3   5  10   27.77    1.78 
   3   5  10   31.27    2.25 
  -3   5 -10   28.06    3.25 
  -3   5 -10   34.29    3.29 
   3   5  11   35.57    2.17 
  -3   5 -11   39.21    3.39 
  -3   5 -11   39.03    3.45 
   3   5  12   45.06    2.17 
  -3   5 -12   42.17    3.15 
   3   5  13   15.65    1.12 
   3   6 -11   58.66    3.44 
  -3   6  11   61.38    2.98 
  -3   6  10  188.02    7.84 
   3   6 -10  179.99    8.09 
  -3   6  10  175.05    7.68 
  -3   6   9   13.36    1.97 
   3   6  -9   14.21    2.77 
   3   6  -9   12.19    2.21 
   3   6  -8    8.28    2.06 
   3   6  -8    7.34    2.80 
  -3   6   8    7.58    2.02 
   3   6  -7  117.32    6.31 
   3   6  -7  109.34    5.57 
  -3   6   7  118.66    5.77 
  -3   6   7  116.57    5.09 
  -3   6   6  149.00    6.43 
   3   6  -6  129.22    6.37 
   3   6  -6  160.16    7.40 
   3   6  -6  158.32    7.01 
  -3   6   6  143.46    7.02 
  -3   6   6  146.09    7.03 
  -3   6   5   10.14    1.68 
   3   6  -5   11.21    1.85 
   3   6  -5   13.02    2.43 
   3   6  -5    7.44    2.24 
  -3   6   5    9.93    2.33 
  -3   6   5   11.11    2.69 
  -3   6   4   34.10    2.58 
   3   6  -4   34.31    2.99 
   3   6  -4   38.49    3.17 
  -3   6   4   28.42    2.96 
  -3   6   4   26.18    3.20 
  -3   6   3    0.49    1.84 
   3   6  -3    1.76    1.72 
   3   6  -3   -0.45    1.89 
  -3   6   3    0.21    2.58 
  -3   6   2    1.81    2.00 
   3   6  -2    2.27    1.55 
   3   6  -2    2.94    2.21 
  -3   6   2    2.21    2.48 
   3   6  -2   -0.53    1.83 
  -3   6   1   21.89    2.61 
   3   6  -1   23.88    3.08 
   3   6  -1   27.15    2.79 
   3   6  -1   19.92    2.27 
  -3   6   1   19.94    2.77 
   3   6  -1   24.35    2.82 
  -3   6   0   23.62    2.80 
   3   6   0   27.72    3.16 
   3   6   0   24.66    2.96 
   3   6   0   22.66    2.88 
   3   6   0   23.75    2.34 
  -3   6   0   29.41    3.08 
   3   6   1   13.47    2.82 
   3   6   1   11.61    2.31 
   3   6   1   11.20    1.80 
  -3   6  -1   11.12    2.51 
   3   6   1   12.39    2.62 
  -3   6  -2  124.37    6.82 
   3   6   2  138.68    6.62 
  -3   6  -2  140.39    6.79 
   3   6   2  136.06    6.30 
   3   6   2  143.21    6.84 
  -3   6  -3   22.04    2.74 
   3   6   3   24.98    2.76 
   3   6   3   23.41    2.37 
  -3   6  -3   28.59    2.85 
   3   6   3   25.01    2.05 
   3   6   3   21.90    2.93 
  -3   6  -4   19.04    2.64 
   3   6   4   20.72    2.28 
   3   6   4   18.76    1.98 
   3   6   4   20.38    2.49 
   3   6   4   18.30    1.77 
   3   6   5  138.06    6.23 
   3   6   5  132.62    5.92 
   3   6   5  134.76    6.46 
  -3   6  -5  133.42    6.45 
   3   6   5  132.54    5.79 
   3   6   5  120.34    6.36 
  -3   6  -6   37.76    2.94 
   3   6   6   40.86    2.63 
   3   6   6   38.50    2.20 
   3   6   6   40.00    2.93 
   3   6   6   39.79    2.80 
  -3   6  -7   36.37    2.71 
   3   6   7   38.83    2.39 
   3   6   7   44.87    2.77 
   3   6   7   39.27    2.51 
  -3   6  -8   37.66    2.45 
   3   6   8   40.14    2.22 
   3   6   8   41.48    2.56 
   3   6   8   44.32    2.43 
   3   6   9    7.10    1.23 
   3   6   9    8.29    1.08 
  -3   7   6   13.79    1.39 
   3   7  -5   43.66    2.35 
  -3   7   5   40.07    2.10 
   3   7  -4   29.04    1.88 
  -3   7   4   31.74    1.88 
  -3   7   4   34.44    2.26 
   3   7  -3   27.79    1.95 
  -3   7   3   24.54    1.84 
  -3   7   3   29.85    2.22 
  -3   7   2  109.72    5.06 
   3   7  -2  112.12    5.17 
   3   7  -2  115.05    5.29 
  -3   7   2  108.50    5.29 
  -3   7   1    9.65    1.64 
   3   7  -1    9.61    1.63 
   3   7  -1   10.35    1.66 
  -3   7   1    9.30    1.74 
  -3   7   0    7.35    1.54 
   3   7   0    8.41    1.60 
   3   7   0    8.13    1.55 
  -3   7   0    9.30    1.75 
   3   7   1  104.54    4.86 
  -3   7  -1  109.71    5.12 
  -3   7  -2    6.53    1.65 
   3   7   2    4.96    1.10 
  -3   7  -3   15.31    1.77 
   3   7   3   13.42    1.13 
  -3   7  -4    3.49    1.34 
  -3   7  -5   36.51    2.11 
  -4  -7   6   50.62    2.65 
  -4  -7   6   50.32    2.81 
  -4  -7   5   29.51    1.91 
  -4  -7   5   29.51    2.27 
  -4  -7   4   37.94    2.41 
  -4  -7   4   41.78    2.82 
  -4  -7   3  125.90    6.05 
  -4  -7   3  124.03    6.01 
  -4  -7   2   39.23    3.06 
  -4  -7   1   25.74    2.69 
  -4  -7   0   -1.45    2.17 
  -4  -7  -1   79.08    4.04 
  -4  -7  -1   86.14    4.63 
  -4  -7  -1   80.79    4.56 
  -4  -7  -2   79.34    4.28 
  -4  -7  -2   75.25    4.18 
   4  -7   2   80.35    4.18 
  -4  -7  -2   73.10    3.93 
  -4  -7  -2   70.14    4.23 
  -4  -7  -3  184.26    8.20 
  -4  -7  -3  178.39    8.12 
  -4  -7  -3  172.38    7.98 
  -4  -7  -3  177.86    8.21 
  -4  -7  -4  121.49    5.83 
  -4  -7  -4  138.14    5.93 
  -4  -7  -4  123.22    5.90 
  -4  -6  11   25.27    1.91 
  -4  -6  10    7.39    1.29 
  -4  -6  10    7.25    1.65 
  -4  -6  10    5.07    1.40 
  -4  -6   9   68.28    3.72 
  -4  -6   9   66.90    3.80 
  -4  -6   9   70.95    4.13 
  -4  -6   8    8.93    2.00 
  -4  -6   8    7.12    2.41 
  -4  -6   8    5.40    1.55 
  -4  -6   8    7.94    2.17 
  -4  -6   7    7.95    2.91 
  -4  -6   7    6.01    2.01 
  -4  -6   7    8.64    1.81 
  -4  -6   6  112.61    5.98 
  -4  -6   6  112.32    5.72 
  -4  -6   6  122.76    6.62 
  -4  -6   5   57.90    4.90 
  -4  -6   5   60.52    3.89 
  -4  -6   4   28.33    3.94 
  -4  -6   4   28.85    4.22 
  -4  -6   4   27.22    2.80 
  -4  -6   3  106.19    6.71 
  -4  -6   3   96.77    5.63 
  -4  -6   3  111.83    6.61 
  -4  -6   2   46.02    4.64 
  -4  -6   2   39.04    4.10 
  -4  -6   2   37.74    3.79 
  -4  -6   1    6.51    3.93 
  -4  -6   1   13.86    3.42 
  -4  -6   1   12.06    3.22 
  -4  -6   0   12.63    3.78 
  -4  -6   0    9.46    3.67 
  -4  -6   0   10.45    3.30 
  -4  -6  -1   98.51    6.15 
  -4  -6  -1   93.48    6.28 
  -4  -6  -1  106.06    6.40 
  -4  -6  -2   50.59    4.79 
  -4  -6  -2   50.41    4.71 
  -4  -6  -2   54.42    4.82 
  -4  -6  -3  194.44    9.70 
  -4  -6  -3  191.00    9.70 
   4  -6   4   25.09    2.85 
  -4  -6  -4   26.83    4.03 
  -4  -6  -4   25.15    3.60 
   4  -6   5   34.59    2.88 
  -4  -6  -5   30.35    3.94 
  -4  -6  -5   32.88    3.76 
  -4  -6  -5   36.70    4.08 
   4  -6   5   34.31    3.57 
  -4  -6  -6  174.32    8.60 
   4  -6   6  198.26    8.64 
  -4  -6  -6  201.98    9.40 
  -4  -6  -6  203.45    9.64 
  -4  -6  -6  180.82    9.18 
   4  -6   6  229.32    9.21 
  -4  -6  -7   24.23    2.84 
   4  -6   7   30.90    2.25 
  -4  -6  -7   26.81    3.12 
  -4  -6  -7   27.13    2.52 
   4  -6   7   34.07    2.80 
   4  -6   8  186.79    7.42 
  -4  -6  -8  156.39    7.70 
   4  -6   8  184.58    7.55 
  -4  -6  -8  143.86    7.46 
   4  -6   8  194.86    7.52 
   4  -6   8  191.03    7.50 
   4  -6   9   62.44    3.11 
   4  -6   9   65.36    3.19 
   4  -6   9   63.75    3.22 
  -4  -6  -9   59.71    3.78 
  -4  -5  14    1.13    1.13 
  -4  -5  13   10.49    1.82 
   4  -5 -13   10.71    2.18 
  -4  -5  13   13.20    1.49 
   4  -5 -12   52.88    3.73 
  -4  -5  12   52.81    3.10 
  -4  -5  12   58.72    3.43 
  -4  -5  12   58.84    3.65 
  -4  -5  11   34.04    3.20 
   4  -5 -11   26.42    3.06 
  -4  -5  11   30.32    2.72 
  -4  -5  11   28.42    2.56 
  -4  -5  11   30.36    2.97 
  -4  -5  10   31.37    3.46 
  -4  -5  10   22.25    2.76 
  -4  -5  10   27.64    2.75 
  -4  -5  10   26.91    3.33 
  -4  -5   9   93.45    5.19 
  -4  -5   9   86.74    4.99 
  -4  -5   9   84.84    5.38 
  -4  -5   9   81.86    5.52 
  -4  -5   8   34.17    3.35 
  -4  -5   8   26.67    3.78 
  -4  -5   8   24.59    2.98 
  -4  -5   7  229.44   11.89 
  -4  -5   7  257.21   11.84 
  -4  -5   7  248.54   11.19 
  -4  -5   6  157.71    8.73 
  -4  -5   6  150.64    7.64 
  -4  -5   5  206.96    9.95 
  -4  -5   5  207.63   10.75 
  -4  -5   5  221.69   10.76 
  -4  -5   4  375.50   16.87 
  -4  -5   4  365.58   16.43 
  -4  -5   4  372.80   16.34 
  -4  -5   3   29.12    4.10 
  -4  -5   3   21.22    3.82 
  -4  -5   2   31.55    4.29 
  -4  -5   2   33.38    4.25 
  -4  -5   1  198.57   10.19 
  -4  -5   1  200.70    9.96 
  -4  -5   1  196.83    9.98 
  -4  -5   0  203.02   10.31 
  -4  -5   0  209.97   10.38 
  -4  -5  -1  426.09   17.95 
  -4  -5  -1  424.12   18.77 
  -4  -5  -2  279.78   12.56 
  -4  -5  -2  268.16   13.19 
  -4  -5  -3    2.95    3.92 
  -4  -5  -3    4.90    3.35 
  -4  -5  -3   -5.06    3.75 
  -4  -5  -4   18.39    3.76 
  -4  -5  -4   16.58    4.42 
  -4  -5  -5  105.12    6.52 
   4  -5   5   94.89    5.59 
   4  -5   6  373.99   16.63 
   4  -5   6  425.00   16.42 
  -4  -5  -6  365.83   15.91 
  -4  -5  -6  386.94   16.72 
  -4  -5  -6  331.74   16.87 
  -4  -5  -7  235.23   11.08 
   4  -5   7  236.47   10.30 
  -4  -5  -7  214.74   10.06 
  -4  -5  -7  213.96   11.24 
   4  -5   7  224.00   10.68 
   4  -5   8   26.46    2.83 
  -4  -5  -8   24.66    2.91 
  -4  -5  -8   24.72    4.12 
  -4  -5  -8   27.86    4.34 
   4  -5   8   28.99    3.43 
   4  -5   9    6.53    2.49 
   4  -5   9    6.90    2.47 
  -4  -5  -9    6.34    2.30 
  -4  -5  -9    6.50    3.39 
   4  -5   9    3.85    2.52 
   4  -5   9    7.70    2.49 
   4  -5  10   66.53    3.82 
   4  -5  10   64.23    3.88 
  -4  -5 -10   50.75    4.04 
  -4  -5 -10   55.73    3.83 
  -4  -5 -10   59.66    4.61 
   4  -5  10   74.53    4.24 
   4  -5  10   63.93    3.83 
  -4  -5 -11   18.98    2.87 
  -4  -5 -11   12.29    2.16 
  -4  -5 -11   12.14    2.01 
   4  -5  11   18.98    2.13 
   4  -5  11   18.54    2.02 
  -4  -5 -11   19.71    2.88 
   4  -5  11   18.18    1.83 
   4  -5  11   15.88    1.89 
  -4  -5 -12   98.52    5.23 
   4  -5  12  106.07    4.77 
   4  -5  12  111.26    4.79 
  -4  -4  16   19.22    1.56 
   4  -4 -16   14.29    2.19 
  -4  -4  15   22.18    2.20 
   4  -4 -15   22.51    2.37 
   4  -4 -15   25.30    2.76 
  -4  -4  15   19.70    1.65 
   4  -4 -14   41.93    3.37 
   4  -4 -14   44.27    3.77 
  -4  -4  14   40.73    2.89 
  -4  -4  14   39.54    3.19 
   4  -4 -13   69.44    4.45 
  -4  -4  13   68.52    4.22 
  -4  -4  13   78.21    4.65 
   4  -4 -13   69.68    5.01 
   4  -4 -12  140.20    6.99 
  -4  -4  12  132.67    6.73 
  -4  -4  12  137.51    6.97 
  -4  -4  12  137.63    7.12 
  -4  -4  11  152.79    7.26 
   4  -4 -11  137.08    7.11 
  -4  -4  11  141.54    7.18 
  -4  -4  11  143.78    7.44 
  -4  -4  11  144.77    7.64 
  -4  -4  10   68.08    5.15 
  -4  -4  10   71.95    4.63 
  -4  -4  10   75.22    4.63 
  -4  -4  10   67.54    5.04 
  -4  -4   9  173.28    8.43 
  -4  -4   9  177.51    8.44 
  -4  -4   9  165.24    8.78 
  -4  -4   8  149.00    8.50 
  -4  -4   8  152.86    7.76 
  -4  -4   8  155.68    7.83 
  -4  -4   8  164.07    8.37 
  -4  -4   7  262.52   12.21 
  -4  -4   7  250.64   11.36 
  -4  -4   7  241.03   11.29 
  -4  -4   6   43.14    4.63 
  -4  -4   6   45.02    4.14 
  -4  -4   6   40.21    4.58 
  -4  -4   5   18.97    3.62 
  -4  -4   5   15.97    3.82 
  -4  -4   5   10.78    3.39 
  -4  -4   4    7.71    3.62 
  -4  -4   4    6.12    3.27 
  -4  -4   4    8.13    3.46 
  -4  -4   3  780.14   32.10 
  -4  -4   3  797.37   32.06 
  -4  -4   3  769.13   32.17 
  -4  -4   2  912.11   36.84 
  -4  -4   2  892.02   36.29 
  -4  -4   2  905.64   36.71 
  -4  -4   2  920.48   36.88 
  -4  -4   1  127.68    7.11 
  -4  -4   1  126.60    6.38 
  -4  -4   0  216.65   10.08 
  -4  -4   0  223.06   10.48 
  -4  -4  -1   82.40    5.27 
  -4  -4  -1   80.13    5.52 
  -4  -4  -2   93.21    5.70 
  -4  -4  -2  103.63    5.24 
  -4  -4  -3  101.32    6.14 
  -4  -4  -3  101.59    5.82 
  -4  -4  -3  104.25    5.46 
  -4  -4  -4  210.84    9.96 
  -4  -4  -4  208.98    9.72 
  -4  -4  -4  202.15    9.29 
  -4  -4  -4  179.16    9.93 
  -4  -4  -5  267.37   12.87 
  -4  -4  -5  282.56   12.75 
  -4  -4  -5  275.65   12.31 
  -4  -4  -6  198.65    9.87 
   4  -4   6  200.90    9.41 
   4  -4   6  198.30    8.93 
  -4  -4  -6  205.85    9.39 
   4  -4   6  175.36    9.62 
   4  -4   7  137.98    6.92 
  -4  -4  -7  139.87    7.76 
  -4  -4  -7  132.21    7.15 
   4  -4   7  125.55    7.15 
   4  -4   7  124.15    6.35 
  -4  -4  -8  402.91   17.94 
  -4  -4  -8  392.13   18.01 
   4  -4   8  404.55   17.23 
  -4  -4  -8  399.15   17.57 
   4  -4   8  415.51   17.54 
   4  -4   8  402.14   16.87 
   4  -4   9   21.17    2.33 
  -4  -4  -9   14.98    4.40 
   4  -4   9   21.01    3.36 
  -4  -4  -9   18.70    4.55 
   4  -4   9   18.64    3.54 
  -4  -4  -9   19.90    3.88 
   4  -4   9   24.40    2.90 
   4  -4   9   23.89    3.57 
  -4  -4  -9   20.89    4.32 
  -4  -4 -10   29.24    4.38 
  -4  -4 -10   29.89    4.40 
   4  -4  10   36.26    3.57 
   4  -4  10   25.43    3.68 
  -4  -4 -10   27.66    4.22 
  -4  -4 -10   32.15    2.97 
   4  -4  10   30.42    3.38 
   4  -4  11   65.93    4.15 
  -4  -4 -11   64.06    5.28 
  -4  -4 -11   52.94    4.79 
   4  -4  11   69.05    4.51 
   4  -4  11   55.11    4.01 
  -4  -4 -11   53.67    3.69 
  -4  -4 -11   54.57    4.79 
  -4  -4 -12   42.63    4.17 
  -4  -4 -12   45.04    4.41 
   4  -4  12   48.82    3.53 
  -4  -4 -12   49.03    4.24 
   4  -4  12   44.69    3.36 
  -4  -4 -12   43.73    3.85 
   4  -4  12   48.18    3.06 
   4  -4  13   31.92    2.37 
  -4  -4 -13   31.02    3.16 
   4  -4  13   27.83    1.97 
  -4  -4 -13   29.87    3.14 
   4  -4  13   28.29    2.34 
   4  -4  14    8.54    1.17 
  -4  -4 -14   11.83    1.97 
  -4  -3  17   14.58    1.61 
   4  -3 -17   12.72    2.13 
   4  -3 -17   10.77    2.32 
   4  -3 -16    2.06    2.04 
  -4  -3  16    0.21    1.86 
   4  -3 -16    4.92    2.59 
   4  -3 -16   -2.26    2.94 
  -4  -3  16    0.11    1.45 
   4  -3 -15    3.80    2.30 
  -4  -3  15    4.37    2.47 
   4  -3 -15    6.90    2.86 
  -4  -3  15    5.54    1.96 
   4  -3 -14   89.44    5.09 
   4  -3 -14   76.88    5.47 
   4  -3 -14   77.32    4.51 
  -4  -3  14   84.71    4.84 
  -4  -3  14   84.27    4.98 
   4  -3 -13   47.31    3.86 
   4  -3 -13   53.65    3.54 
  -4  -3  13   45.40    4.01 
  -4  -3  13   54.46    4.24 
   4  -3 -12   39.87    3.11 
  -4  -3  12   41.47    4.01 
  -4  -3  12   46.31    3.58 
  -4  -3  12   41.10    3.78 
   4  -3 -12   42.82    3.57 
  -4  -3  11   77.38    4.75 
  -4  -3  11   75.93    4.47 
   4  -3 -11   72.43    4.16 
  -4  -3  11   72.35    4.91 
  -4  -3  11   75.53    4.77 
  -4  -3  11   73.78    4.87 
  -4  -3  10  278.47   12.52 
  -4  -3  10  275.34   12.18 
  -4  -3  10  275.38   12.31 
  -4  -3  10  286.46   12.37 
  -4  -3  10  266.99   12.54 
  -4  -3   9  242.46   10.78 
  -4  -3   9  244.32   10.81 
  -4  -3   9  235.93   11.11 
  -4  -3   9  223.07   10.97 
  -4  -3   8  176.45    8.80 
  -4  -3   8  189.64    9.33 
  -4  -3   8  191.77    8.75 
  -4  -3   8  200.31    9.22 
  -4  -3   7   36.25    3.83 
  -4  -3   7   31.14    2.87 
  -4  -3   7   30.49    3.46 
  -4  -3   6  262.78   11.75 
  -4  -3   6  253.72   11.55 
  -4  -3   5   14.12    3.06 
   4  -3  -5   12.12    2.86 
  -4  -3   5   11.53    2.87 
  -4  -3   5   12.98    2.72 
   4  -3  -4  174.81    9.55 
  -4  -3   4  173.65    8.22 
  -4  -3   4  179.75    7.85 
  -4  -3   4  173.16    8.36 
  -4  -3   4  165.49    8.31 
  -4  -3   3   77.93    5.89 
   4  -3  -3   65.15    5.31 
  -4  -3   3   75.23    4.64 
   4  -3  -3   81.71    5.45 
  -4  -3   3   68.48    3.97 
   4  -3  -3   82.48    5.13 
  -4  -3   3   73.39    4.55 
   4  -3  -2   23.41    3.21 
  -4  -3   2   22.59    2.33 
  -4  -3   2   23.03    3.42 
   4  -3  -2   14.80    2.64 
  -4  -3   2   13.97    3.58 
  -4  -3   2   17.55    3.72 
   4  -3  -2   23.01    2.72 
  -4  -3   2   25.17    2.74 
  -4  -3   2   20.78    2.87 
  -4  -3   1  801.10   32.85 
  -4  -3   1  772.56   30.71 
   4  -3  -1  726.64   31.92 
   4  -3  -1  787.56   31.92 
  -4  -3   1  761.42   30.89 
  -4  -3   1  758.41   30.76 
  -4  -3   1  759.55   30.44 
  -4  -3   0  250.68   12.33 
  -4  -3   0  237.14   10.25 
  -4  -3   0  244.94   10.57 
   4  -3   0  243.84   11.48 
  -4  -3  -1  374.74   15.20 
  -4  -3  -1  365.68   16.99 
  -4  -3  -1  356.99   15.11 
  -4  -3  -1  356.46   14.92 
   4  -3   1  352.33   16.03 
  -4  -3  -2  116.44    5.75 
  -4  -3  -2  111.05    5.62 
   4  -3   2   93.41    6.24 
  -4  -3  -2  117.96    7.19 
  -4  -3  -2  104.77    5.85 
  -4  -3  -2  117.95    5.48 
  -4  -3  -3  730.01   28.10 
  -4  -3  -3  723.42   27.93 
  -4  -3  -4   53.66    3.98 
  -4  -3  -4   49.32    3.08 
  -4  -3  -4   54.46    3.68 
  -4  -3  -5   35.01    3.75 
   4  -3   5   32.32    3.10 
  -4  -3  -5   40.52    3.96 
  -4  -3  -5   33.12    3.39 
  -4  -3  -5   36.18    2.89 
   4  -3   6   21.66    2.42 
  -4  -3  -6   21.09    2.40 
  -4  -3  -6   23.07    3.92 
  -4  -3  -6   23.82    3.28 
  -4  -3  -6   24.14    2.73 
   4  -3   6   24.96    2.98 
   4  -3   6   17.47    3.11 
   4  -3   7  337.73   14.35 
  -4  -3  -7  323.54   14.24 
  -4  -3  -7  322.02   14.08 
  -4  -3  -7  347.82   14.81 
   4  -3   7  324.81   14.57 
   4  -3   7  331.92   14.07 
  -4  -3  -8   42.62    4.81 
  -4  -3  -8   34.81    3.70 
   4  -3   8   32.70    3.36 
  -4  -3  -8   36.39    4.39 
  -4  -3  -8   32.86    3.24 
   4  -3   8   34.25    3.77 
   4  -3   8   39.75    3.09 
   4  -3   9   55.51    4.58 
   4  -3   9   52.71    4.58 
  -4  -3  -9   51.45    4.89 
  -4  -3  -9   51.25    5.38 
  -4  -3  -9   54.77    5.22 
  -4  -3  -9   55.28    4.44 
  -4  -3  -9   46.29    3.81 
   4  -3   9   39.62    4.66 
   4  -3   9   49.70    3.94 
   4  -3   9   59.66    4.38 
   4  -3   9   62.43    3.79 
  -4  -3 -10   13.21    3.84 
  -4  -3 -10    8.96    4.39 
  -4  -3 -10   18.28    2.99 
  -4  -3 -10   20.46    3.39 
   4  -3  10   16.47    3.10 
   4  -3  10   13.34    3.20 
  -4  -3 -10   17.69    4.40 
   4  -3  10   14.50    3.18 
  -4  -3 -11   41.19    4.76 
  -4  -3 -11   41.79    5.18 
   4  -3  11   47.13    3.91 
   4  -3  11   48.85    4.06 
  -4  -3 -11   40.51    4.37 
  -4  -3 -11   48.26    3.93 
   4  -3  11   43.01    4.29 
  -4  -3 -12   34.21    4.70 
  -4  -3 -12   27.84    4.13 
  -4  -3 -12   39.08    4.03 
   4  -3  12   26.24    3.59 
  -4  -3 -12   31.50    3.32 
  -4  -3 -12   29.45    3.42 
   4  -3  12   34.36    2.99 
  -4  -3 -13   71.19    5.00 
  -4  -3 -13   72.86    5.53 
   4  -3  13   77.20    4.57 
  -4  -3 -13   82.49    5.22 
   4  -3  13   83.78    4.69 
  -4  -3 -13   77.48    4.68 
   4  -3  13   71.47    4.11 
  -4  -3 -14   21.26    3.44 
  -4  -3 -14   21.82    2.69 
  -4  -3 -14   24.83    3.05 
  -4  -3 -14   18.51    2.48 
   4  -3  14   23.89    2.26 
   4  -3  14   18.19    1.74 
   4  -3  15    2.26    1.26 
   4  -3  15    2.10    1.25 
  -4  -3 -15   -1.35    2.20 
   4  -2 -18   37.53    3.06 
   4  -2 -18   37.48    2.92 
   4  -2 -17   69.59    4.31 
  -4  -2  17   63.21    3.38 
  -4  -2  17   63.96    3.70 
   4  -2 -17   63.67    4.55 
  -4  -2  16    2.95    2.45 
  -4  -2  16    1.62    1.90 
   4  -2 -15   77.83    5.14 
   4  -2 -15   74.16    4.71 
  -4  -2  15   69.56    4.48 
   4  -2 -14   78.90    5.39 
   4  -2 -14   85.29    5.08 
  -4  -2  14   75.85    4.79 
  -4  -2  13  174.85    8.15 
   4  -2 -13  171.72    7.98 
   4  -2 -13  179.72    8.45 
  -4  -2  13  169.98    8.45 
  -4  -2  13  175.62    8.48 
  -4  -2  12  649.44   26.22 
   4  -2 -12  623.25   25.88 
   4  -2 -12  650.81   26.22 
  -4  -2  12  625.05   26.33 
  -4  -2  12  655.23   26.45 
  -4  -2  11  164.74    8.00 
  -4  -2  11  169.75    8.03 
   4  -2 -11  167.46    7.62 
  -4  -2  11  168.66    8.31 
  -4  -2  11  167.93    8.32 
  -4  -2  10   48.75    3.52 
  -4  -2  10   53.96    3.81 
  -4  -2  10   44.42    3.95 
  -4  -2  10   46.36    3.03 
   4  -2 -10   50.45    3.06 
  -4  -2  10   49.00    3.68 
  -4  -2  10   43.89    3.65 
  -4  -2   9  243.44   10.62 
  -4  -2   9  249.18   10.79 
  -4  -2   9  252.91   10.96 
  -4  -2   9  259.97   11.03 
  -4  -2   9  249.82   11.23 
  -4  -2   9  249.72   11.15 
  -4  -2   8   23.43    2.67 
  -4  -2   8   22.92    2.28 
  -4  -2   8   21.59    2.30 
  -4  -2   8   24.42    2.37 
  -4  -2   7  265.06   11.78 
   4  -2  -7  309.58   14.39 
  -4  -2   7  272.46   11.43 
  -4  -2   7  298.09   13.96 
  -4  -2   7  272.80   11.44 
  -4  -2   7  259.97   11.42 
  -4  -2   7  261.75   11.69 
  -4  -2   7  262.10   11.62 
   4  -2  -6   20.16    3.90 
  -4  -2   6   20.39    2.59 
  -4  -2   6   18.80    2.09 
   4  -2  -6   25.93    2.63 
   4  -2  -6   28.65    3.61 
  -4  -2   6   22.51    2.65 
  -4  -2   6   21.65    2.03 
   4  -2  -5  402.49   18.30 
  -4  -2   5  376.54   16.08 
   4  -2  -5  376.61   16.57 
   4  -2  -5  375.49   15.96 
  -4  -2   5  388.63   15.88 
  -4  -2   5  382.11   16.12 
  -4  -2   5  372.93   16.14 
  -4  -2   5  401.48   18.29 
   4  -2  -5  410.46   16.27 
   4  -2  -5  419.36   17.59 
   4  -2  -4  105.17    6.61 
  -4  -2   4  100.87    5.09 
   4  -2  -4   98.51    5.12 
  -4  -2   4  110.17    7.27 
   4  -2  -4  112.01    5.00 
  -4  -2   4   99.37    6.88 
   4  -2  -4  113.78    5.92 
  -4  -2   4   97.62    5.19 
   4  -2  -4   93.71    4.30 
  -4  -2   4  103.10    5.16 
  -4  -2   4  106.52    6.49 
  -4  -2   3  450.90   19.52 
   4  -2  -3  424.12   17.86 
  -4  -2   3  440.27   17.86 
  -4  -2   3  441.47   17.83 
  -4  -2   3  453.72   20.09 
  -4  -2   3  427.81   19.89 
  -4  -2   3  459.24   17.97 
   4  -2  -3  431.01   18.40 
   4  -2  -3  415.50   19.21 
   4  -2  -3  445.20   18.59 
   4  -2  -3  413.70   17.67 
   4  -2  -2 2129.71   90.55 
  -4  -2   2 2434.75   92.04 
   4  -2  -2 2357.62   91.69 
   4  -2  -2 2359.66   90.23 
  -4  -2   2 2417.42   92.41 
   4  -2  -2 2336.55   90.91 
  -4  -2   2 2328.45   90.28 
  -4  -2   2 2159.10   92.22 
   4  -2  -2 2277.19   90.77 
   4  -2  -1 1029.99   43.39 
   4  -2  -1 1058.47   43.14 
  -4  -2   1 1129.36   42.77 
   4  -2  -1 1073.00   43.82 
   4  -2  -1 1113.87   44.14 
  -4  -2   1 1123.69   44.43 
   4  -2  -1 1052.86   43.08 
  -4  -2   1 1087.51   42.75 
  -4  -2   1 1066.03   42.84 
   4  -2   0 2173.30   93.60 
  -4  -2   0 2382.09   94.40 
   4  -2   0 2535.03   94.23 
  -4  -2   0 2428.56   92.85 
   4  -2   0 2300.51   92.95 
   4  -2   0 2409.10   92.41 
   4  -2   0 2347.22   92.44 
   4  -2   1  502.34   19.57 
  -4  -2  -1  477.91   21.29 
   4  -2   1  514.10   20.37 
  -4  -2  -1  507.55   21.65 
  -4  -2  -1  498.11   19.97 
   4  -2   1  469.70   21.07 
   4  -2   1  456.70   19.68 
   4  -2   1  522.39   20.11 
  -4  -2  -1  517.94   19.90 
   4  -2   1  519.15   21.35 
  -4  -2  -1  512.28   20.08 
   4  -2   1  520.41   20.31 
   4  -2   2   33.12    3.21 
   4  -2   2   30.16    2.02 
   4  -2   2   33.68    1.84 
  -4  -2  -2   34.17    2.60 
   4  -2   2   32.98    2.57 
  -4  -2  -2   35.85    2.59 
  -4  -2  -2   33.21    3.20 
   4  -2   2   30.18    3.22 
  -4  -2  -2   32.14    3.46 
  -4  -2  -2   31.61    2.41 
   4  -2   3   46.65    2.56 
  -4  -2  -3   47.49    2.76 
  -4  -2  -3   51.47    3.22 
  -4  -2  -3   47.52    3.04 
   4  -2   3   46.84    3.26 
  -4  -2  -3   40.89    3.78 
   4  -2   3   48.07    3.98 
  -4  -2  -3   47.65    2.81 
  -4  -2  -4  484.47   18.90 
   4  -2   4  448.54   18.91 
   4  -2   4  459.47   19.84 
   4  -2   4  437.00   20.57 
  -4  -2  -4  427.66   20.46 
  -4  -2  -4  476.17   18.94 
  -4  -2  -4  482.25   19.11 
  -4  -2  -5   47.41    3.06 
  -4  -2  -5   47.92    3.50 
   4  -2   5   45.08    3.52 
  -4  -2  -5   43.96    3.06 
  -4  -2  -5   43.33    4.15 
   4  -2   5   42.78    3.17 
   4  -2   5   46.98    2.93 
  -4  -2  -5   40.99    4.00 
  -4  -2  -5   45.36    3.30 
   4  -2   6    8.17    1.69 
  -4  -2  -6    3.62    2.01 
  -4  -2  -6    3.89    2.67 
   4  -2   6    3.99    1.86 
  -4  -2  -6    5.53    2.17 
   4  -2   6    5.96    2.17 
  -4  -2  -7  235.56   10.36 
  -4  -2  -7  237.93   10.79 
  -4  -2  -7  234.63   10.50 
   4  -2   7  228.35   10.19 
   4  -2   7  232.17   10.43 
   4  -2   7  225.69   10.04 
  -4  -2  -8  743.82   29.69 
  -4  -2  -8  719.59   29.90 
   4  -2   8  717.49   29.61 
  -4  -2  -8  726.37   29.73 
   4  -2   8  678.16   29.54 
   4  -2   8  744.38   29.37 
   4  -2   8  750.63   29.67 
  -4  -2  -9  529.80   22.46 
  -4  -2  -9  506.68   22.65 
  -4  -2  -9  547.77   22.62 
  -4  -2  -9  532.08   22.66 
   4  -2   9  560.33   22.38 
   4  -2   9  515.05   22.26 
   4  -2   9  546.55   22.42 
   4  -2  10   19.75    3.48 
  -4  -2 -10   24.21    4.05 
  -4  -2 -10   16.30    4.05 
  -4  -2 -10   25.00    4.53 
   4  -2  10   18.81    3.51 
   4  -2  10   24.60    3.22 
   4  -2  11  181.86    8.42 
  -4  -2 -11  167.75    8.82 
  -4  -2 -11  162.03    9.15 
  -4  -2 -11  166.49    9.25 
  -4  -2 -11  180.73    9.37 
  -4  -2 -11  181.20    9.10 
   4  -2  11  178.50    8.85 
  -4  -2 -12  142.59    7.73 
  -4  -2 -12  118.07    7.08 
  -4  -2 -12  130.69    7.66 
  -4  -2 -12  139.25    8.16 
  -4  -2 -12  133.11    8.00 
   4  -2  12  148.12    6.84 
   4  -2  12  138.55    7.30 
  -4  -2 -13   20.06    3.15 
  -4  -2 -13   20.14    3.77 
  -4  -2 -13   26.85    4.57 
   4  -2  13   27.74    3.29 
  -4  -2 -13   20.04    3.94 
  -4  -2 -13   27.23    4.28 
   4  -2  13   27.47    2.73 
  -4  -2 -14   -0.88    3.07 
  -4  -2 -14    6.61    2.89 
  -4  -2 -14   -1.07    3.84 
   4  -2  14    2.57    2.40 
  -4  -2 -14    1.58    3.34 
   4  -2  14    0.69    2.29 
   4  -2  14    1.33    1.54 
  -4  -2 -15  120.15    6.14 
   4  -2  15  111.20    5.06 
  -4  -2 -15  101.21    5.73 
  -4  -2 -15  101.18    5.65 
   4  -2  15   89.83    4.49 
   4  -2  15  106.85    4.98 
  -4  -2 -16   13.16    2.12 
   4  -2  16   10.51    1.31 
  -4  -2 -16   10.76    2.00 
   4  -2  16   13.67    1.43 
  -4  -1  19   64.42    3.04 
  -4  -1  18    2.24    1.58 
   4  -1 -18    1.34    2.44 
   4  -1 -18    2.17    2.18 
  -4  -1  18    1.67    1.11 
  -4  -1  17   29.75    2.82 
   4  -1 -17   29.83    3.65 
   4  -1 -17   30.40    2.84 
  -4  -1  17   31.65    2.52 
   4  -1 -16  206.98   10.23 
   4  -1 -16  220.01   10.17 
   4  -1 -16  214.67   10.12 
   4  -1 -16  212.61    9.67 
  -4  -1  16  199.63    9.35 
   4  -1 -15   44.98    4.16 
   4  -1 -15   44.24    4.58 
   4  -1 -15   39.55    3.25 
   4  -1 -15   40.02    4.57 
   4  -1 -15   34.73    3.49 
  -4  -1  15   38.78    3.49 
   4  -1 -14  407.75   17.71 
   4  -1 -14  420.74   18.12 
   4  -1 -14  434.73   17.91 
  -4  -1  14  422.98   17.84 
   4  -1 -13  526.63   21.50 
   4  -1 -13  546.33   21.81 
  -4  -1  13  507.44   21.30 
  -4  -1  13  476.78   21.67 
   4  -1 -13  516.32   21.56 
  -4  -1  13  543.19   21.66 
  -4  -1  12  328.25   14.24 
  -4  -1  12  322.91   13.90 
   4  -1 -12  331.31   14.05 
   4  -1 -12  324.26   13.93 
  -4  -1  12  323.24   14.19 
  -4  -1  12  331.71   14.28 
  -4  -1  11  128.77    6.55 
   4  -1 -11  125.55    6.19 
  -4  -1  11  129.89    5.97 
  -4  -1  11  129.64    6.63 
  -4  -1  11  127.08    6.22 
   4  -1 -11  127.48    6.22 
  -4  -1  11  120.67    6.32 
  -4  -1  10  218.16    9.61 
   4  -1 -10  232.02    9.75 
  -4  -1  10  220.07   10.14 
  -4  -1  10  228.19    9.84 
  -4  -1  10  213.95   10.09 
  -4  -1  10  228.81   10.00 
  -4  -1   9   41.91    3.50 
  -4  -1   9   51.42    3.07 
   4  -1  -9   38.12    3.68 
  -4  -1   9   45.91    3.33 
  -4  -1   9   55.59    3.25 
  -4  -1   9   45.55    2.87 
  -4  -1   9   47.24    3.12 
  -4  -1   8  151.52    8.69 
  -4  -1   8  151.78    6.66 
   4  -1  -8  148.76    8.46 
  -4  -1   8  150.66    6.70 
  -4  -1   8  152.30    6.71 
   4  -1  -8  143.42    7.78 
  -4  -1   8  144.10    6.88 
  -4  -1   8  147.86    6.61 
  -4  -1   8  149.21    8.24 
  -4  -1   8  142.75    6.76 
  -4  -1   7   35.54    2.36 
  -4  -1   7   32.92    3.85 
   4  -1  -7   39.32    3.65 
   4  -1  -7   32.43    3.02 
  -4  -1   7   36.30    2.60 
  -4  -1   7   36.69    3.51 
  -4  -1   7   32.66    2.68 
  -4  -1   7   35.01    2.45 
  -4  -1   6 1505.99   59.86 
   4  -1  -6 1356.35   59.22 
   4  -1  -6 1422.30   59.16 
  -4  -1   6 1413.22   57.87 
  -4  -1   6 1537.50   57.88 
  -4  -1   6 1606.95   59.58 
  -4  -1   5  361.50   15.02 
   4  -1  -5  314.41   14.16 
   4  -1  -5  325.05   13.39 
  -4  -1   5  354.22   14.48 
  -4  -1   4  754.00   29.17 
  -4  -1   4  710.84   29.39 
   4  -1  -4  700.69   28.55 
   4  -1  -4  699.80   28.12 
   4  -1  -4  623.50   28.54 
   4  -1  -3   26.51    2.55 
  -4  -1   3   29.62    3.18 
   4  -1  -3   23.32    3.37 
   4  -1  -3   23.34    2.46 
  -4  -1   3   21.24    3.26 
   4  -1  -3   23.03    2.62 
   4  -1  -3   27.54    2.32 
   4  -1  -2 1444.06   57.59 
   4  -1  -2 1431.07   57.55 
   4  -1  -2 1449.06   58.09 
  -4  -1   2 1568.99   58.73 
  -4  -1   2 1559.85   58.20 
   4  -1  -2 1348.21   56.98 
   4  -1  -2 1525.69   57.64 
   4  -1  -1 1208.78   48.28 
   4  -1  -1 1171.03   47.15 
  -4  -1   1 1276.71   48.40 
   4  -1  -1 1232.63   48.46 
  -4  -1   1 1269.30   49.11 
   4  -1   0 2204.23   90.83 
  -4  -1   0 2346.61   91.35 
  -4  -1   0 2375.81   91.41 
   4  -1   0 2502.71   91.27 
   4  -1   0 2176.63   90.52 
  -4  -1  -1  978.30   42.65 
   4  -1   1 1066.97   43.29 
  -4  -1  -1 1003.01   43.58 
   4  -1   1 1090.55   42.93 
   4  -1   1 1167.56   43.53 
   4  -1   1 1128.20   42.74 
   4  -1   2    6.91    2.07 
  -4  -1  -2    9.09    2.14 
  -4  -1  -2    4.03    1.62 
   4  -1   2    3.92    2.22 
  -4  -1  -2    2.66    2.51 
   4  -1   2    4.73    1.68 
   4  -1   2    6.64    1.56 
   4  -1   3  110.75    5.49 
  -4  -1  -3   98.82    5.41 
  -4  -1  -3  109.12    4.90 
  -4  -1  -3  105.09    6.05 
  -4  -1  -4 1040.09   40.68 
   4  -1   4 1009.69   41.65 
  -4  -1  -4 1053.24   40.78 
   4  -1   4 1049.56   42.44 
  -4  -1  -4 1031.34   40.70 
  -4  -1  -4 1034.30   40.75 
  -4  -1  -4  955.65   41.45 
  -4  -1  -4 1017.84   42.21 
   4  -1   5   17.23    1.93 
  -4  -1  -5   17.35    2.90 
  -4  -1  -5   21.73    2.19 
   4  -1   5   15.40    2.21 
  -4  -1  -5   16.39    2.19 
  -4  -1  -5   17.40    2.41 
  -4  -1  -5   14.14    2.14 
   4  -1   5   18.82    1.97 
   4  -1   5   16.21    2.03 
  -4  -1  -5   17.50    2.74 
  -4  -1  -5   16.95    2.18 
   4  -1   5   16.61    1.78 
  -4  -1  -6  330.24   13.62 
  -4  -1  -6  284.22   14.45 
  -4  -1  -6  327.52   13.57 
   4  -1   6  310.21   14.19 
  -4  -1  -6  331.85   13.62 
  -4  -1  -6  329.23   13.63 
   4  -1   6  319.61   13.54 
  -4  -1  -6  301.95   13.26 
   4  -1   6  329.26   13.46 
  -4  -1  -6  308.26   15.31 
   4  -1   6  329.37   13.42 
  -4  -1  -6  315.57   15.36 
   4  -1   6  326.85   13.49 
  -4  -1  -7  276.65   11.27 
   4  -1   7  244.61   11.13 
   4  -1   7  233.41   11.72 
  -4  -1  -7  268.08   11.27 
  -4  -1  -7  243.99   11.19 
  -4  -1  -7  245.58   11.19 
   4  -1   7  247.45   10.95 
   4  -1   7  260.50   10.96 
  -4  -1  -7  245.75   10.84 
   4  -1   7  264.52   11.02 
  -4  -1  -8  224.73   10.00 
  -4  -1  -8  220.56    9.86 
   4  -1   8  212.22    9.61 
   4  -1   8  204.50    9.81 
  -4  -1  -8  215.81    9.92 
  -4  -1  -8  209.45    9.53 
   4  -1   8  205.41    9.62 
   4  -1   8  218.42    9.59 
   4  -1   9   30.35    3.43 
  -4  -1  -9   30.23    3.86 
  -4  -1  -9   21.78    3.30 
  -4  -1  -9   26.52    3.05 
   4  -1   9   25.37    3.30 
  -4  -1  -9   34.67    3.97 
   4  -1   9   28.13    2.84 
  -4  -1 -10   18.53    3.25 
  -4  -1 -10   19.09    2.97 
   4  -1  10   12.61    2.90 
  -4  -1 -10   17.47    3.91 
  -4  -1 -10   18.76    3.60 
   4  -1  10   18.73    2.98 
  -4  -1 -11  222.86   10.51 
  -4  -1 -11  187.64    9.76 
   4  -1  11  210.75    9.89 
  -4  -1 -11  198.67    9.59 
  -4  -1 -11  204.28   10.26 
   4  -1  11  214.11    9.47 
   4  -1  12   26.88    2.88 
  -4  -1 -12   26.56    4.50 
  -4  -1 -12   23.58    3.61 
   4  -1  12   35.18    3.57 
  -4  -1 -12   26.26    4.19 
  -4  -1 -12   28.84    4.61 
  -4  -1 -13   20.31    4.59 
  -4  -1 -13   15.88    3.12 
  -4  -1 -13   15.43    4.72 
  -4  -1 -13   11.96    3.66 
   4  -1  13   12.70    3.01 
   4  -1  13   11.27    2.28 
  -4  -1 -14   52.78    5.39 
  -4  -1 -14   45.53    4.24 
   4  -1  14   53.22    3.91 
   4  -1  14   50.37    3.71 
  -4  -1 -14   57.40    5.18 
   4  -1  14   51.81    3.21 
  -4  -1 -15   13.78    3.54 
  -4  -1 -15   10.30    2.72 
   4  -1  15    9.61    2.16 
   4  -1  15   14.08    2.11 
   4  -1  15   10.89    1.50 
  -4  -1 -16    2.92    2.53 
   4  -1  16    3.02    1.36 
   4   0 -19   -2.43    1.56 
  -4   0  19   -0.24    1.04 
   4   0 -18   10.54    2.49 
   4   0 -18   14.56    2.33 
   4   0 -18   11.53    1.89 
   4   0 -18   13.17    2.40 
  -4   0  18   12.92    1.61 
   4   0 -17    1.65    3.13 
   4   0 -17   -0.11    2.60 
   4   0 -17    2.16    2.68 
  -4   0  17   -0.67    1.91 
   4   0 -16  103.82    6.26 
   4   0 -16   97.50    5.97 
   4   0 -16  103.84    6.10 
  -4   0  16  102.46    5.45 
   4   0 -16  103.55    5.85 
   4   0 -15    0.25    2.75 
   4   0 -15    1.76    3.33 
   4   0 -15   -1.92    3.10 
   4   0 -15    0.38    3.06 
  -4   0  15    1.45    2.46 
   4   0 -14   42.63    3.95 
   4   0 -14   45.58    4.07 
  -4   0  14   41.05    3.53 
  -4   0  14   45.66    4.06 
  -4   0  14   43.31    3.86 
   4   0 -13  686.42   27.64 
  -4   0  13  689.35   27.61 
  -4   0  13  666.54   27.56 
   4   0 -13  663.18   27.18 
   4   0 -13  680.78   27.65 
  -4   0  13  655.93   27.01 
  -4   0  13  674.23   27.51 
   4   0 -12  131.90    6.90 
  -4   0  12  131.40    6.98 
  -4   0  12  146.95    7.11 
   4   0 -12  137.19    6.57 
   4   0 -12  129.47    6.93 
  -4   0  12  145.68    6.58 
  -4   0  12  146.58    7.14 
   4   0 -11   21.39    2.72 
  -4   0  11   19.42    3.18 
  -4   0  11   14.93    2.85 
  -4   0  11   18.64    2.78 
   4   0 -11   22.01    2.24 
   4   0 -11   25.40    2.89 
  -4   0  11   24.44    2.45 
  -4   0  11   21.74    2.99 
   4   0 -10    2.50    2.09 
  -4   0  10    0.36    2.15 
   4   0 -10    1.29    1.22 
  -4   0  10    0.68    2.25 
   4   0 -10    0.34    1.53 
  -4   0  10   -0.39    2.63 
  -4   0  10    1.29    1.75 
  -4   0   9  632.80   26.74 
  -4   0   9  674.05   27.02 
  -4   0   9  698.26   26.70 
   4   0  -9  663.65   26.56 
  -4   0   9  658.98   26.96 
   4   0  -9  657.72   26.48 
  -4   0   9  663.30   26.74 
  -4   0   9  695.85   28.30 
   4   0  -8  191.53   10.60 
  -4   0   8  209.27    9.16 
  -4   0   8  214.77    9.10 
  -4   0   8  220.04    8.89 
  -4   0   8  207.38    9.16 
   4   0  -8  198.74    8.68 
  -4   0   8  200.60    8.93 
   4   0  -8  201.90   10.38 
   4   0  -8  214.68   12.59 
   4   0  -8  204.96    8.65 
   4   0  -8  210.78   12.36 
  -4   0   8  197.33    9.00 
  -4   0   8  204.67    8.84 
  -4   0   8  220.08   10.20 
  -4   0   8  215.01   11.03 
  -4   0   7  651.60   27.32 
   4   0  -7  670.14   28.90 
  -4   0   7  684.80   27.30 
  -4   0   7  699.32   27.21 
  -4   0   7  678.16   27.34 
   4   0  -7  660.14   26.95 
   4   0  -7  703.91   30.31 
   4   0  -7  707.54   30.37 
  -4   0   7  672.13   27.10 
  -4   0   7  734.45   29.40 
   4   0  -7  671.60   28.85 
  -4   0   7  691.00   27.24 
  -4   0   7  725.46   28.52 
  -4   0   6  739.53   30.01 
   4   0  -6  654.63   29.12 
  -4   0   6  716.46   28.02 
  -4   0   6  691.04   28.18 
   4   0  -6  692.66   29.56 
   4   0  -6  776.69   30.89 
   4   0  -6  720.06   30.58 
  -4   0   6  704.97   28.10 
   4   0  -6  695.59   29.54 
  -4   0   6  687.47   28.07 
  -4   0   6  764.38   29.35 
  -4   0   5   73.81    4.69 
   4   0  -5   79.54    4.94 
   4   0  -5   73.71    5.53 
   4   0  -5   74.24    4.69 
  -4   0   4  289.38   14.05 
  -4   0   4  316.54   13.84 
   4   0  -4  320.89   13.93 
   4   0  -4  309.41   13.98 
   4   0  -4  311.29   13.63 
   4   0  -3    5.95    2.88 
   4   0  -3   14.70    2.29 
  -4   0   3   11.32    2.40 
  -4   0   3   15.40    2.84 
   4   0  -3    9.02    2.27 
   4   0  -3   14.19    2.38 
  -4   0   2 1261.76   48.91 
   4   0  -2 1201.30   48.99 
   4   0  -2 1231.35   48.71 
  -4   0   2 1268.18   49.05 
   4   0  -2 1131.78   48.56 
   4   0  -1   31.47    2.88 
   4   0  -1   29.71    1.89 
   4   0  -1   32.02    3.10 
  -4   0   1   30.47    3.38 
  -4   0   0 1364.72   57.10 
  -4   0   0 1417.59   56.88 
   4   0   0 1464.81   56.92 
   4   0   0 1442.79   56.88 
   4   0   0 1426.47   56.99 
   4   0   1   42.68    3.50 
  -4   0  -1   39.73    3.38 
   4   0   1   46.58    3.48 
  -4   0  -1   39.11    3.42 
  -4   0  -2   22.71    1.35 
  -4   0  -2   20.30    2.71 
   4   0   2   29.11    2.94 
   4   0   2   25.67    2.68 
   4   0   2   26.89    2.65 
   4   0   3   -1.74    2.24 
  -4   0  -3    0.05    0.93 
   4   0   3    3.67    1.82 
  -4   0  -3    0.58    1.85 
   4   0   3    0.84    1.72 
  -4   0  -4   68.88    3.57 
  -4   0  -4   64.59    3.41 
  -4   0  -4   66.27    3.51 
   4   0   4   68.10    4.83 
  -4   0  -4   68.70    3.58 
   4   0   4   70.37    4.36 
  -4   0  -4   64.70    4.12 
  -4   0  -4   66.83    3.54 
   4   0   4   74.17    4.50 
  -4   0  -5  215.91    9.49 
  -4   0  -5  229.58    9.50 
   4   0   5  226.72   10.46 
   4   0   5  231.55   11.06 
  -4   0  -5  224.31   10.89 
  -4   0  -5  230.12    9.55 
   4   0   5  229.52    9.35 
   4   0   5  217.01    9.42 
  -4   0  -5  223.10    9.42 
  -4   0  -5  215.99    9.34 
  -4   0  -5  193.92    9.73 
  -4   0  -5  232.14    9.29 
  -4   0  -5  212.28   11.18 
  -4   0  -5  199.34    9.66 
   4   0   5  218.83    9.33 
  -4   0  -5  193.99   10.86 
  -4   0  -6   32.07    2.67 
  -4   0  -6   33.99    2.76 
  -4   0  -6   29.80    3.75 
   4   0   6   35.77    3.12 
   4   0   6   34.36    3.06 
  -4   0  -6   39.62    2.70 
  -4   0  -6   36.16    2.98 
   4   0   6   34.64    3.63 
  -4   0  -6   33.59    2.63 
  -4   0  -6   35.18    4.20 
  -4   0  -6   31.01    3.88 
  -4   0  -6   32.53    2.40 
   4   0   6   33.24    2.53 
  -4   0  -6   34.21    2.70 
   4   0   6   33.17    2.70 
   4   0   6   33.14    2.48 
   4   0   6   33.71    2.51 
  -4   0  -7  700.88   26.73 
  -4   0  -7  616.16   26.80 
  -4   0  -7  692.03   27.01 
   4   0   7  651.37   26.84 
  -4   0  -7  697.81   27.04 
  -4   0  -7  666.01   26.85 
  -4   0  -7  656.48   26.79 
   4   0   7  664.02   26.73 
   4   0   7  669.00   26.71 
  -4   0  -7  631.74   26.70 
   4   0   7  661.69   26.75 
  -4   0  -8   66.24    4.56 
   4   0   8   75.48    4.36 
  -4   0  -8   66.44    4.02 
   4   0   8   67.65    4.14 
  -4   0  -8   65.91    4.63 
  -4   0  -8   70.97    4.34 
   4   0   8   63.00    4.11 
  -4   0  -8   67.58    4.26 
   4   0   8   69.24    4.10 
  -4   0  -8   74.19    4.01 
  -4   0  -9   26.52    3.64 
  -4   0  -9   36.07    4.13 
  -4   0  -9   34.68    3.30 
   4   0   9   39.03    3.31 
  -4   0  -9   32.05    3.61 
  -4   0  -9   35.33    2.98 
   4   0   9   32.88    3.10 
  -4   0 -10   -2.75    3.60 
  -4   0 -10    0.97    3.73 
  -4   0 -10   -1.81    2.55 
  -4   0 -10    0.85    2.73 
   4   0  10   -0.77    1.94 
  -4   0 -10    2.76    2.30 
  -4   0 -11   36.55    4.51 
   4   0  11   30.84    2.47 
  -4   0 -11   30.61    3.74 
  -4   0 -11   33.51    3.98 
   4   0  11   35.82    3.20 
  -4   0 -11   31.25    4.58 
  -4   0 -11   27.05    2.98 
  -4   0 -12  557.29   22.53 
  -4   0 -12  554.50   22.58 
   4   0  12  516.42   21.79 
  -4   0 -12  490.60   21.89 
  -4   0 -12  524.56   22.08 
   4   0  12  508.08   21.45 
  -4   0 -13    4.56    4.17 
  -4   0 -13    3.54    2.83 
  -4   0 -13    3.31    4.05 
  -4   0 -13   -0.13    3.16 
   4   0  13    1.09    2.75 
   4   0  13    0.21    2.77 
   4   0  13   -1.05    1.94 
  -4   0 -14   22.99    4.20 
  -4   0 -14   22.65    4.19 
   4   0  14   19.89    2.94 
   4   0  14   17.92    2.84 
   4   0  14   20.75    2.13 
  -4   0 -15    1.71    3.15 
   4   0  15    2.04    1.88 
  -4   0 -15    4.30    3.53 
   4   0  15    2.01    1.20 
  -4   0 -16    9.71    2.83 
   4   0  16    8.61    1.61 
  -4   0 -17    2.44    1.56 
   4   0  17   -0.27    0.79 
  -4   1  19   62.92    2.83 
   4   1 -19   57.74    3.25 
   4   1 -18    4.03    2.09 
   4   1 -18    4.48    2.36 
  -4   1  18    3.60    1.31 
   4   1 -17   31.15    3.25 
   4   1 -17   32.82    3.61 
  -4   1  17   30.58    2.59 
   4   1 -16  196.70    9.67 
  -4   1  16  212.65    9.38 
   4   1 -16  187.36    9.22 
   4   1 -16  214.29    9.96 
  -4   1  16  216.43    9.29 
   4   1 -16  201.41    9.86 
   4   1 -15   39.03    4.36 
   4   1 -15   40.23    3.88 
  -4   1  15   44.60    3.86 
  -4   1  15   40.98    3.63 
   4   1 -15   41.75    3.62 
   4   1 -15   41.52    4.29 
  -4   1  15   37.46    3.52 
   4   1 -14  420.38   18.09 
   4   1 -14  441.99   17.96 
  -4   1  14  406.00   17.95 
  -4   1  14  458.11   17.80 
   4   1 -14  396.46   17.62 
   4   1 -14  404.28   17.59 
   4   1 -14  392.93   17.30 
   4   1 -14  414.77   17.93 
  -4   1  14  435.84   17.76 
   4   1 -13  531.39   21.92 
  -4   1  13  507.80   21.65 
  -4   1  13  509.35   21.88 
   4   1 -13  515.98   21.58 
   4   1 -13  515.17   21.40 
   4   1 -13  539.61   21.86 
  -4   1  13  523.35   21.69 
   4   1 -12  322.53   14.48 
  -4   1  12  343.26   14.38 
  -4   1  12  356.38   14.72 
   4   1 -12  315.61   14.23 
   4   1 -12  328.22   14.39 
   4   1 -11  127.75    6.58 
  -4   1  11  127.11    6.39 
  -4   1  11  119.08    6.80 
   4   1 -11  129.87    6.18 
  -4   1  11  133.08    6.28 
   4   1 -11  127.14    6.38 
  -4   1  10  223.95   10.18 
  -4   1  10  223.79   10.46 
   4   1 -10  228.89   10.00 
   4   1 -10  233.91   10.19 
  -4   1  10  230.00   10.24 
   4   1 -10  221.90    9.89 
  -4   1  10  242.60   10.06 
  -4   1   9   46.19    3.30 
  -4   1   9   51.79    3.64 
   4   1  -9   44.06    2.97 
  -4   1   9   48.39    3.07 
   4   1  -9   46.94    2.92 
  -4   1   9   43.74    2.94 
  -4   1   9   48.87    3.29 
   4   1  -8  147.91    9.92 
  -4   1   8  153.40    6.77 
  -4   1   8  140.15    6.69 
   4   1  -8  144.77    8.45 
   4   1  -8  134.90    8.03 
  -4   1   8  156.57    7.07 
   4   1  -8  148.83    6.43 
   4   1  -8  145.16    6.56 
   4   1  -8  140.76    6.50 
  -4   1   8  134.65    6.50 
  -4   1   8  158.99    6.69 
   4   1  -7   32.25    3.33 
  -4   1   7   35.96    2.67 
  -4   1   7   33.52    2.76 
  -4   1   7   32.88    2.44 
  -4   1   7   34.37    2.76 
   4   1  -7   30.78    4.30 
   4   1  -7   34.53    2.33 
   4   1  -7   33.44    2.27 
  -4   1   7   34.86    2.46 
   4   1  -7   32.66    2.11 
   4   1  -7   29.91    3.46 
  -4   1   7   30.03    2.30 
  -4   1   7   31.64    2.29 
  -4   1   6 1490.90   57.29 
  -4   1   6 1451.34   56.64 
  -4   1   6 1473.98   56.67 
   4   1  -6 1469.99   56.44 
   4   1  -6 1563.70   58.18 
   4   1  -6 1412.77   56.40 
  -4   1   6 1350.12   56.46 
   4   1  -6 1396.42   58.19 
  -4   1   6 1437.23   56.56 
  -4   1   5  333.72   14.26 
   4   1  -5  350.62   15.20 
  -4   1   5  322.06   13.45 
   4   1  -5  337.94   15.02 
  -4   1   4  699.66   28.95 
   4   1  -4  712.81   29.65 
   4   1  -4  711.76   29.59 
  -4   1   4  718.26   29.74 
  -4   1   3   26.98    3.03 
   4   1  -3   22.34    2.61 
  -4   1   3   26.04    2.67 
  -4   1   2 1444.39   58.85 
   4   1  -2 1539.49   58.63 
  -4   1   2 1389.87   58.58 
   4   1  -2 1515.99   58.94 
  -4   1   1 1287.25   50.93 
   4   1  -1 1276.82   50.59 
   4   1  -1 1318.84   51.07 
   4   1  -1 1198.43   51.03 
  -4   1   0 2234.23   90.93 
   4   1   0 2380.57   90.74 
   4   1   0 2346.74   90.92 
   4   1   0 2467.32   91.57 
  -4   1   0 2057.57   90.85 
   4   1   0 2324.26   91.44 
   4   1   0 2435.51   91.38 
   4   1   1 1144.84   44.13 
   4   1   1 1023.65   43.82 
   4   1   1 1193.16   43.51 
  -4   1  -1 1038.22   43.51 
  -4   1  -1 1035.80   43.09 
  -4   1  -2    4.29    1.98 
   4   1   2    3.20    2.19 
   4   1   3  108.64    6.35 
   4   1   3  106.77    4.92 
  -4   1  -3  105.48    4.81 
  -4   1  -3   99.39    6.04 
  -4   1  -4 1052.21   40.48 
  -4   1  -4 1080.91   40.50 
   4   1   4  986.98   42.07 
  -4   1  -4  939.72   40.40 
   4   1   4 1129.91   40.57 
  -4   1  -4 1025.53   40.49 
   4   1   4 1078.24   40.57 
   4   1   4 1070.49   41.99 
  -4   1  -4  937.31   41.92 
  -4   1  -4 1028.70   40.47 
   4   1   4  990.22   40.50 
  -4   1  -4 1049.39   40.52 
  -4   1  -4  964.09   40.43 
   4   1   4  981.37   40.51 
  -4   1  -5   16.02    2.05 
  -4   1  -5   24.02    2.05 
  -4   1  -5   15.40    1.82 
   4   1   5   18.45    1.74 
   4   1   5   15.31    2.67 
  -4   1  -5   18.78    2.04 
  -4   1  -5   19.16    2.00 
   4   1   5   17.30    2.10 
  -4   1  -5   15.73    2.08 
   4   1   5   18.85    2.06 
  -4   1  -6  335.32   13.48 
  -4   1  -6  330.20   13.43 
   4   1   6  317.29   15.01 
   4   1   6  317.12   14.44 
   4   1   6  317.32   13.36 
   4   1   6  334.36   13.27 
  -4   1  -6  338.50   13.51 
   4   1   6  302.97   13.37 
  -4   1  -6  325.68   13.39 
   4   1   6  275.86   13.26 
  -4   1  -7  258.21   11.25 
   4   1   7  265.70   11.16 
  -4   1  -7  266.09   11.35 
   4   1   7  256.66   10.94 
  -4   1  -7  261.31   11.37 
  -4   1  -7  268.84   11.22 
   4   1   7  248.26   11.23 
   4   1   7  248.23   11.14 
  -4   1  -8  208.66    9.67 
  -4   1  -8  218.62    9.93 
   4   1   8  212.83    9.27 
  -4   1  -8  214.00    9.86 
   4   1   8  212.16    9.63 
  -4   1  -8  211.10    9.66 
   4   1   8  222.07    9.60 
   4   1   8  216.24    9.54 
  -4   1  -9   29.06    3.70 
  -4   1  -9   28.39    2.95 
   4   1   9   28.86    2.39 
  -4   1  -9   28.38    3.22 
  -4   1  -9   24.02    2.91 
   4   1   9   29.72    3.30 
   4   1   9   26.74    2.01 
   4   1   9   21.38    3.02 
   4   1   9   26.41    2.79 
  -4   1 -10   13.28    3.48 
  -4   1 -10   17.05    2.41 
   4   1  10   16.03    1.94 
  -4   1 -10   15.73    3.61 
  -4   1 -10   21.68    2.89 
  -4   1 -10   17.77    3.87 
   4   1  10   21.91    2.73 
  -4   1 -10   12.05    2.95 
  -4   1 -11  222.20   10.27 
   4   1  11  192.30    8.79 
  -4   1 -11  208.62   10.05 
  -4   1 -11  197.28    9.40 
  -4   1 -11  203.65   10.28 
  -4   1 -11  209.10    9.88 
   4   1  11  216.77    9.37 
  -4   1 -12   39.41    4.36 
  -4   1 -12   32.71    4.03 
  -4   1 -12   27.24    4.30 
   4   1  12   33.99    2.99 
  -4   1 -12   30.62    3.73 
  -4   1 -13   11.53    3.78 
  -4   1 -13   18.40    4.26 
   4   1  13   14.97    2.14 
  -4   1 -13   10.61    3.38 
   4   1  13   15.51    2.55 
  -4   1 -13   18.37    3.07 
  -4   1 -14   56.31    3.89 
  -4   1 -14   52.30    4.62 
   4   1  14   54.13    3.72 
  -4   1 -14   51.85    4.46 
   4   1  14   48.29    3.12 
  -4   1 -15   12.58    3.16 
   4   1  15   14.97    2.17 
   4   1  15   15.87    1.51 
  -4   1 -16    4.14    2.14 
   4   1  16    4.71    1.35 
  -4   2  18   47.48    2.47 
   4   2 -18   47.51    3.23 
  -4   2  17   70.84    3.67 
   4   2 -17   66.83    4.45 
  -4   2  17   63.95    3.52 
   4   2 -16    4.33    2.11 
  -4   2  16    3.56    1.43 
  -4   2  16    5.02    2.04 
   4   2 -16    5.08    3.26 
   4   2 -16   10.12    1.91 
   4   2 -15   65.88    4.38 
  -4   2  15   83.95    5.25 
  -4   2  15   70.28    4.51 
   4   2 -15   68.87    4.24 
   4   2 -15   72.38    5.22 
  -4   2  15   67.25    4.35 
   4   2 -14   72.83    4.60 
  -4   2  14   85.59    4.80 
  -4   2  14   66.41    5.36 
   4   2 -14   78.49    5.13 
   4   2 -14   75.32    4.69 
   4   2 -14   73.58    5.10 
   4   2 -14   76.50    5.47 
  -4   2  14   79.95    4.92 
   4   2 -13  167.47    8.93 
   4   2 -13  156.04    8.24 
  -4   2  13  192.64    8.50 
   4   2 -13  175.90    8.67 
   4   2 -13  183.85    8.49 
   4   2 -13  183.42    8.85 
   4   2 -13  171.43    8.59 
  -4   2  12  654.83   26.30 
   4   2 -12  614.82   25.88 
   4   2 -12  645.20   26.40 
   4   2 -12  620.62   26.30 
   4   2 -12  644.60   26.47 
   4   2 -12  674.65   26.59 
  -4   2  11  169.00    8.26 
   4   2 -11  178.71    8.41 
   4   2 -11  173.69    8.34 
   4   2 -11  167.67    8.30 
   4   2 -11  160.59    8.04 
  -4   2  11  176.65    8.28 
   4   2 -10   46.28    3.37 
   4   2 -10   48.82    3.88 
   4   2 -10   43.39    3.55 
  -4   2  10   44.09    3.68 
  -4   2  10   53.32    4.22 
   4   2 -10   45.85    3.68 
   4   2 -10   46.39    3.59 
  -4   2  10   48.30    3.57 
   4   2  -9  250.45   11.11 
  -4   2   9  257.70   11.21 
  -4   2   9  257.57   11.51 
  -4   2   9  244.94   11.00 
   4   2  -9  260.22   11.05 
   4   2  -9  261.61   11.04 
  -4   2   9  242.19   11.08 
   4   2  -8   27.24    2.48 
  -4   2   8   22.59    2.55 
  -4   2   8   23.65    2.69 
  -4   2   8   21.06    2.84 
   4   2  -8   23.65    2.37 
  -4   2   8   23.56    2.65 
  -4   2   7  260.04   11.48 
  -4   2   7  290.01   11.73 
   4   2  -7  270.70   11.35 
   4   2  -7  255.53   11.32 
   4   2  -7  288.41   11.37 
   4   2  -7  267.60   13.17 
  -4   2   7  249.01   11.09 
   4   2  -7  271.95   12.68 
  -4   2   7  275.43   11.54 
   4   2  -6   23.30    3.05 
   4   2  -6   19.24    2.04 
  -4   2   6   19.53    2.02 
  -4   2   6   19.43    2.29 
  -4   2   6   19.89    2.32 
   4   2  -6   22.41    3.52 
   4   2  -6   22.79    2.09 
   4   2  -6   26.45    2.79 
  -4   2   6   19.73    1.86 
  -4   2   6   20.50    2.30 
   4   2  -5  380.20   15.77 
  -4   2   5  363.93   15.79 
   4   2  -5  391.20   17.97 
  -4   2   5  387.08   15.96 
   4   2  -5  421.21   17.66 
   4   2  -5  389.47   15.70 
   4   2  -5  392.87   15.74 
   4   2  -5  393.23   17.73 
  -4   2   5  389.76   15.75 
   4   2  -5  392.84   15.77 
  -4   2   5  373.12   15.84 
   4   2  -4  105.94    6.15 
   4   2  -4   88.40    4.61 
  -4   2   4  105.32    4.87 
   4   2  -4  120.34    6.67 
  -4   2   4   92.66    4.58 
   4   2  -4  104.22    6.30 
  -4   2   4   91.64    4.55 
   4   2  -4   98.22    4.55 
   4   2  -4   99.19    4.60 
   4   2  -3  392.96   16.94 
   4   2  -3  436.98   18.80 
   4   2  -3  452.11   18.83 
   4   2  -3  418.68   16.90 
   4   2  -3  436.94   17.01 
   4   2  -3  415.78   16.96 
   4   2  -2 2261.16   90.80 
   4   2  -2 2452.23   92.36 
   4   2  -2 2320.09   92.23 
   4   2  -2 2467.06   92.52 
   4   2  -2 2252.50   90.76 
   4   2  -2 2321.83   90.85 
   4   2  -2 2383.26   92.56 
   4   2  -2 2372.58   90.88 
   4   2  -1 1098.44   43.92 
   4   2  -1 1140.68   45.30 
   4   2  -1 1155.96   44.17 
   4   2  -1 1124.16   45.26 
   4   2  -1 1085.34   43.87 
   4   2  -1 1121.14   45.44 
   4   2  -1 1102.38   45.11 
   4   2   0 2575.48   93.87 
   4   2   0 2416.18   92.48 
   4   2   0 2286.94   92.26 
   4   2   0 2380.70   93.80 
   4   2   0 2455.55   93.51 
   4   2   0 2479.85   93.70 
  -4   2   0 2279.68   92.09 
  -4   2  -1  491.20   20.05 
   4   2   1  514.46   21.49 
   4   2   1  497.00   20.17 
   4   2   1  557.09   21.83 
  -4   2  -1  499.15   20.10 
   4   2   1  517.93   20.28 
   4   2   1  535.75   21.79 
  -4   2  -1  519.91   20.22 
  -4   2  -1  461.16   20.90 
   4   2   1  475.37   20.18 
   4   2   1  512.89   21.72 
   4   2   2   40.33    3.52 
  -4   2  -2   37.83    2.45 
   4   2   2   29.53    2.39 
   4   2   2   32.79    3.55 
  -4   2  -2   33.05    2.32 
   4   2   2   29.80    2.29 
   4   2   2   31.85    2.44 
  -4   2  -2   32.68    2.37 
   4   2   2   31.19    3.23 
  -4   2  -2   31.73    2.93 
   4   2   2   35.01    2.23 
   4   2   3   52.56    4.02 
   4   2   3   46.51    2.94 
   4   2   3   46.86    2.99 
  -4   2  -3   45.83    2.85 
   4   2   3   49.42    2.86 
  -4   2  -3   49.06    2.76 
   4   2   3   46.16    3.07 
  -4   2  -3   46.43    3.02 
  -4   2  -3   42.48    2.61 
   4   2   3   50.31    3.98 
   4   2   3   41.88    3.91 
  -4   2  -3   51.50    3.82 
  -4   2  -4  437.06   20.30 
  -4   2  -4  463.74   18.77 
  -4   2  -4  491.31   18.97 
   4   2   4  470.51   18.86 
   4   2   4  476.45   18.76 
  -4   2  -4  466.20   18.66 
  -4   2  -4  445.40   18.73 
   4   2   4  434.22   18.91 
   4   2   4  478.74   20.51 
   4   2   4  434.77   18.90 
  -4   2  -4  485.70   18.97 
   4   2   4  442.92   20.42 
  -4   2  -5   45.21    2.84 
  -4   2  -5   45.70    2.96 
  -4   2  -5   47.43    3.27 
   4   2   5   44.72    2.89 
   4   2   5   48.66    3.34 
  -4   2  -5   42.92    3.15 
   4   2   5   48.09    2.71 
   4   2   5   43.44    4.01 
  -4   2  -5   43.31    3.07 
  -4   2  -6    7.62    2.00 
  -4   2  -6    5.93    2.27 
   4   2   6    3.65    1.57 
   4   2   6    6.09    2.28 
  -4   2  -6    3.27    2.24 
  -4   2  -6    7.63    1.92 
   4   2   6    5.37    1.35 
  -4   2  -7  248.20   10.20 
  -4   2  -7  234.28   10.32 
  -4   2  -7  232.63   10.15 
   4   2   7  236.54    9.70 
   4   2   7  224.80    9.84 
  -4   2  -7  212.49   10.03 
  -4   2  -7  228.52   10.37 
   4   2   7  234.22   10.26 
   4   2   7  208.29   10.08 
  -4   2  -8  707.20   29.10 
  -4   2  -8  720.89   29.09 
   4   2   8  732.41   28.76 
   4   2   8  727.46   28.58 
   4   2   8  710.11   29.12 
  -4   2  -8  683.62   29.00 
  -4   2  -8  736.83   29.32 
  -4   2  -8  702.69   29.33 
   4   2   8  716.70   28.98 
  -4   2  -9  575.05   23.15 
  -4   2  -9  540.49   22.78 
  -4   2  -9  550.97   22.66 
  -4   2  -9  536.07   22.67 
   4   2   9  563.71   22.72 
  -4   2  -9  503.63   22.84 
   4   2   9  574.75   22.59 
  -4   2 -10   24.68    3.42 
  -4   2 -10   22.35    2.78 
   4   2  10   22.76    3.02 
  -4   2 -10   26.65    4.12 
   4   2  10   19.37    2.70 
  -4   2 -10   19.14    3.43 
  -4   2 -10   25.71    3.15 
  -4   2 -11  159.46    8.49 
  -4   2 -11  170.59    8.66 
  -4   2 -11  178.08    9.16 
   4   2  11  176.25    8.13 
  -4   2 -11  187.77    9.13 
  -4   2 -12  144.71    7.41 
  -4   2 -12  135.17    7.94 
  -4   2 -12  134.20    7.29 
   4   2  12  146.39    6.77 
  -4   2 -12  148.39    7.93 
  -4   2 -13   19.69    3.09 
   4   2  13   25.28    2.36 
  -4   2 -13   23.93    3.58 
  -4   2 -14    2.12    2.45 
   4   2  14    1.02    2.00 
   4   2  14   -0.41    1.34 
  -4   2 -14   -2.54    2.90 
   4   2  15  104.82    4.64 
   4   2  15   88.14    4.17 
  -4   2 -15   97.79    5.10 
   4   2  16   13.97    1.35 
   4   3 -17   10.73    1.88 
  -4   3  17   12.46    1.34 
  -4   3  16    1.27    1.16 
   4   3 -16   -0.45    1.83 
   4   3 -16    1.08    2.30 
  -4   3  16   -0.23    1.46 
   4   3 -15    5.17    2.93 
  -4   3  15    5.04    1.77 
   4   3 -15    7.37    2.28 
   4   3 -15   -1.76    2.76 
   4   3 -14   81.52    5.54 
  -4   3  14   96.41    5.75 
   4   3 -14   87.73    5.28 
   4   3 -14   87.54    5.38 
  -4   3  13   57.79    4.04 
  -4   3  13   55.10    4.59 
   4   3 -13   53.24    3.63 
   4   3 -13   50.85    4.61 
   4   3 -13   47.52    4.30 
   4   3 -13   53.42    4.33 
   4   3 -13   55.53    4.81 
   4   3 -12   40.67    4.02 
  -4   3  12   46.87    3.68 
  -4   3  12   41.78    3.92 
   4   3 -12   41.57    3.46 
   4   3 -12   43.91    4.02 
   4   3 -12   43.25    3.91 
  -4   3  12   41.33    3.66 
   4   3 -11   76.95    4.99 
  -4   3  11   67.94    4.71 
  -4   3  11   71.98    5.24 
   4   3 -11   72.13    4.52 
  -4   3  11   68.20    4.53 
   4   3 -11   79.30    4.71 
  -4   3  10  284.48   12.66 
  -4   3  10  277.49   12.86 
  -4   3  10  277.89   11.91 
   4   3 -10  292.60   12.78 
  -4   3  10  286.12   12.53 
   4   3 -10  287.45   12.65 
   4   3 -10  287.65   12.51 
   4   3  -9  227.01   10.24 
  -4   3   9  232.69   10.43 
  -4   3   9  229.42   10.56 
  -4   3   9  236.82    9.71 
   4   3  -9  221.89   10.35 
   4   3  -9  222.77   10.09 
  -4   3   9  206.17   10.19 
   4   3  -8  191.37    8.80 
   4   3  -8  185.66    8.87 
  -4   3   8  197.52    9.07 
  -4   3   8  198.44    9.17 
   4   3  -8  187.45    8.35 
  -4   3   8  199.73    8.42 
   4   3  -8  204.81    8.98 
   4   3  -8  192.75    8.64 
  -4   3   8  180.57    8.93 
   4   3  -7   34.52    2.80 
  -4   3   7   33.02    3.26 
  -4   3   7   30.27    3.17 
   4   3  -7   30.90    2.39 
  -4   3   7   37.46    2.51 
   4   3  -7   36.27    2.96 
   4   3  -7   29.52    2.99 
   4   3  -7   37.64    2.57 
  -4   3   7   25.51    3.13 
   4   3  -6  251.19   10.76 
   4   3  -6  250.74   10.98 
  -4   3   6  239.06   11.11 
   4   3  -6  260.97   10.75 
  -4   3   6  261.12   10.71 
   4   3  -6  255.22   10.92 
   4   3  -6  257.71   10.65 
  -4   3   6  247.01   11.09 
   4   3  -5   13.93    1.66 
  -4   3   5   14.04    1.33 
  -4   3   5   12.78    2.25 
   4   3  -5   13.13    1.83 
   4   3  -5   14.15    1.95 
   4   3  -5   13.26    1.99 
  -4   3   5   14.98    1.76 
  -4   3   5   11.22    2.25 
   4   3  -4  171.27    7.69 
  -4   3   4  167.64    7.87 
   4   3  -4  180.05    7.76 
  -4   3   4  177.16    7.60 
   4   3  -4  173.11    7.62 
   4   3  -4  182.21    9.39 
   4   3  -4  185.37    7.87 
  -4   3   4  175.99    7.42 
  -4   3   4  167.48    7.81 
   4   3  -4  168.56    7.55 
  -4   3   4  181.60    7.40 
   4   3  -4  172.09    7.48 
  -4   3   3   77.07    3.58 
  -4   3   3   69.29    3.91 
   4   3  -3   75.41    3.92 
   4   3  -3   77.38    5.24 
  -4   3   3   75.87    3.77 
   4   3  -3   72.45    3.60 
   4   3  -3   73.63    3.72 
   4   3  -3   76.17    3.91 
   4   3  -3   71.39    5.42 
   4   3  -3   72.36    3.61 
   4   3  -3   65.61    4.97 
   4   3  -3   69.96    3.64 
  -4   3   3   71.76    3.91 
   4   3  -2   18.65    2.56 
  -4   3   2   23.33    1.78 
   4   3  -2   27.30    1.84 
  -4   3   2   21.23    2.06 
   4   3  -2   23.05    3.18 
   4   3  -2   23.99    2.20 
   4   3  -2   22.48    1.66 
   4   3  -2   24.38    3.41 
  -4   3   2   22.71    2.13 
   4   3  -2   23.70    2.06 
   4   3  -2   22.49    1.66 
   4   3  -2   24.04    2.64 
   4   3  -2   21.88    1.87 
  -4   3   2   22.76    2.06 
  -4   3   1  753.83   29.73 
   4   3  -1  751.25   29.85 
   4   3  -1  755.11   29.61 
   4   3  -1  727.81   29.66 
   4   3  -1  786.07   31.36 
   4   3  -1  796.15   32.22 
  -4   3   1  750.57   29.85 
   4   3  -1  750.35   29.77 
  -4   3   1  758.03   29.81 
   4   3  -1  746.17   29.92 
   4   3  -1  779.58   31.96 
   4   3  -1  731.23   29.58 
   4   3  -1  704.05   29.80 
   4   3  -1  817.82   31.75 
   4   3  -1  771.13   31.19 
   4   3   0  252.93   12.32 
  -4   3   0  234.03   10.09 
   4   3   0  225.83   10.22 
   4   3   0  255.31   10.07 
   4   3   0  233.53   10.08 
   4   3   0  251.31   11.60 
   4   3   0  254.37   10.46 
   4   3   0  226.22   10.20 
   4   3   0  231.67    9.88 
  -4   3   0  245.44   10.12 
   4   3   0  254.36   12.09 
  -4   3   0  242.16   10.22 
   4   3   0  249.44   10.14 
   4   3   0  248.10   11.81 
  -4   3  -1  367.33   14.72 
   4   3   1  360.82   14.61 
  -4   3  -1  378.28   14.92 
   4   3   1  345.84   16.73 
   4   3   1  345.09   14.70 
   4   3   1  381.39   16.34 
  -4   3  -1  349.87   14.73 
   4   3   1  357.83   14.52 
   4   3   1  369.67   15.01 
   4   3   1  360.33   14.74 
   4   3   1  389.44   16.73 
   4   3   1  349.77   14.88 
  -4   3  -1  342.45   14.82 
   4   3   1  377.91   16.49 
  -4   3  -1  346.63   14.61 
   4   3   2  114.85    5.12 
  -4   3  -2  115.96    5.65 
   4   3   2  113.38    5.56 
   4   3   2  115.21    5.56 
  -4   3  -2  117.05    5.60 
  -4   3  -2  111.56    5.48 
   4   3   2  114.37    5.29 
  -4   3  -2  112.80    5.26 
   4   3   2  111.09    5.70 
   4   3   2  127.78    7.02 
  -4   3  -3  728.14   28.92 
  -4   3  -3  747.17   29.18 
   4   3   3  681.83   29.00 
  -4   3  -3  745.78   29.08 
  -4   3  -3  723.18   29.01 
   4   3   3  748.65   28.99 
   4   3   3  677.03   29.08 
   4   3   3  716.14   28.68 
  -4   3  -3  721.32   28.74 
  -4   3  -4   54.03    3.42 
   4   3   4   54.78    3.80 
  -4   3  -4   58.85    3.85 
   4   3   4   58.53    3.38 
  -4   3  -4   50.92    3.12 
   4   3   4   56.82    3.79 
  -4   3  -4   56.41    3.84 
  -4   3  -5   36.80    3.12 
  -4   3  -5   37.74    3.43 
   4   3   5   38.81    3.38 
  -4   3  -5   38.75    3.56 
   4   3   5   37.21    2.60 
  -4   3  -5   37.77    3.30 
  -4   3  -6   23.19    2.76 
  -4   3  -6   24.17    3.39 
   4   3   6   19.77    2.71 
  -4   3  -6   20.94    3.38 
   4   3   6   20.65    1.93 
  -4   3  -6   21.03    3.23 
  -4   3  -7  353.02   14.55 
   4   3   7  317.45   14.59 
  -4   3  -7  328.17   14.59 
   4   3   7  344.92   13.99 
   4   3   7  343.83   14.50 
  -4   3  -7  337.03   15.01 
  -4   3  -8   32.77    3.15 
   4   3   8   37.82    3.46 
  -4   3  -8   32.36    3.98 
  -4   3  -8   27.32    3.42 
   4   3   8   35.65    3.14 
  -4   3  -8   38.44    4.28 
  -4   3  -9   47.71    3.71 
   4   3   9   52.99    4.01 
  -4   3  -9   58.69    4.87 
  -4   3  -9   49.85    4.44 
   4   3   9   55.22    3.81 
  -4   3 -10   17.27    2.49 
  -4   3 -10   13.53    3.73 
   4   3  10   14.91    2.45 
   4   3  10   14.47    2.43 
   4   3  11   49.11    3.61 
  -4   3 -11   50.63    4.56 
   4   3  11   46.99    3.34 
  -4   3 -11   39.83    4.84 
  -4   3 -12   28.39    3.62 
   4   3  12   32.04    2.57 
  -4   3 -12   30.47    4.40 
   4   3  13   70.36    3.64 
  -4   3 -13   68.74    4.88 
   4   3  14   19.62    1.53 
  -4   3 -14   16.79    3.03 
   4   3  15    2.56    1.09 
  -4   3 -15    1.68    1.87 
   4   4 -16   13.79    1.56 
  -4   4  16   19.44    1.33 
   4   4 -15   21.77    2.42 
  -4   4  15   23.75    1.91 
  -4   4  15   22.37    1.90 
   4   4 -14   37.48    2.77 
  -4   4  14   41.03    2.86 
   4   4 -14   40.34    3.47 
   4   4 -13   72.42    4.87 
   4   4 -13   72.71    4.30 
  -4   4  13   77.00    4.41 
  -4   4  12  142.50    7.06 
   4   4 -12  140.04    7.25 
  -4   4  12  145.57    7.02 
   4   4 -12  131.35    6.96 
  -4   4  11  146.96    7.38 
   4   4 -11  148.01    7.57 
  -4   4  11  148.85    6.63 
   4   4 -11  148.75    7.90 
  -4   4  11  150.68    7.28 
   4   4 -11  146.28    7.55 
  -4   4  10   71.15    4.53 
   4   4 -10   72.73    4.93 
  -4   4  10   66.78    3.77 
   4   4 -10   67.52    4.92 
   4   4 -10   69.85    5.07 
  -4   4  10   73.96    4.60 
   4   4 -10   74.98    4.66 
   4   4  -9  159.65    7.95 
  -4   4   9  161.57    8.05 
   4   4  -9  193.22    8.64 
   4   4  -9  160.06    7.51 
  -4   4   9  173.97    7.58 
   4   4  -9  170.15    8.38 
  -4   4   9  163.61    8.15 
   4   4  -8  148.41    7.28 
  -4   4   8  146.25    7.46 
   4   4  -8  149.03    7.06 
  -4   4   8  166.89    7.20 
   4   4  -8  151.72    7.61 
  -4   4   8  167.13    7.88 
  -4   4   7  236.23   11.38 
   4   4  -7  270.80   11.27 
  -4   4   7  274.19   11.20 
   4   4  -7  252.38   11.46 
  -4   4   7  262.63   11.76 
  -4   4   6   49.09    2.80 
  -4   4   6   43.64    3.40 
   4   4  -6   46.14    3.30 
  -4   4   6   51.11    3.30 
   4   4  -6   46.26    3.42 
  -4   4   6   51.93    4.20 
  -4   4   6   48.32    2.75 
  -4   4   5   15.19    1.79 
  -4   4   5   12.91    2.23 
   4   4  -5   12.83    1.91 
   4   4  -5   18.12    2.35 
   4   4  -5   14.71    2.02 
  -4   4   5   17.16    2.25 
  -4   4   5   15.64    2.90 
  -4   4   4    9.29    1.69 
  -4   4   4    9.31    2.82 
   4   4  -4    7.02    1.86 
   4   4  -4    7.77    2.22 
   4   4  -4    8.85    1.72 
   4   4  -4    9.80    1.85 
   4   4  -4    5.43    1.90 
   4   4  -4    6.53    1.78 
  -4   4   3  788.12   31.40 
   4   4  -3  771.35   31.58 
   4   4  -3  778.95   31.75 
   4   4  -3  789.00   31.40 
  -4   4   3  794.46   31.72 
   4   4  -3  796.11   31.47 
   4   4  -3  783.38   31.47 
  -4   4   2  914.81   36.01 
   4   4  -2  906.97   35.82 
   4   4  -2  948.23   36.35 
  -4   4   2  810.39   36.11 
   4   4  -2  934.85   35.97 
   4   4  -2  907.43   36.08 
  -4   4   1  107.12    5.49 
   4   4  -1  108.17    5.55 
   4   4  -1  100.13    5.73 
   4   4  -1  115.73    5.41 
   4   4  -1  120.69    5.32 
  -4   4   0  206.79    9.30 
  -4   4   0  212.24    9.25 
   4   4   0  209.57    9.01 
   4   4   0  209.55    9.24 
  -4   4   0  208.48    9.29 
   4   4   0  219.10    9.55 
  -4   4  -1   75.86    4.33 
   4   4   1   80.05    4.58 
   4   4   1   74.79    4.36 
   4   4   1   83.11    3.91 
  -4   4  -1   71.52    4.31 
   4   4   1   80.18    4.75 
  -4   4  -1   70.11    4.19 
  -4   4  -1   83.59    4.26 
  -4   4  -2  109.47    5.57 
   4   4   2   84.99    5.17 
  -4   4  -2   91.20    5.11 
   4   4   2   97.16    5.38 
   4   4   2   97.45    4.59 
  -4   4  -2  100.46    5.13 
  -4   4  -2   98.21    5.02 
  -4   4  -3  109.52    5.44 
  -4   4  -3  103.97    5.82 
   4   4   3   96.66    5.38 
   4   4   3  101.24    5.56 
  -4   4  -3  105.14    5.42 
  -4   4  -3   99.83    5.20 
   4   4   3   92.77    4.64 
   4   4   3  104.62    5.73 
  -4   4  -3  101.39    5.41 
  -4   4  -4  195.14    9.04 
  -4   4  -4  196.51    9.58 
   4   4   4  188.29    9.21 
  -4   4  -4  200.40    9.32 
  -4   4  -4  214.55    8.91 
   4   4   4  170.41    9.17 
  -4   4  -4  208.83    9.32 
  -4   4  -5  269.44   11.90 
  -4   4  -5  249.73   12.43 
   4   4   5  254.70   12.09 
  -4   4  -5  289.48   12.40 
  -4   4  -5  281.04   11.79 
  -4   4  -5  288.33   12.35 
  -4   4  -6  204.04    9.18 
  -4   4  -6  208.74    9.72 
   4   4   6  186.34    8.74 
   4   4   6  189.91    9.36 
  -4   4  -6  210.25    9.73 
  -4   4  -7  128.15    6.55 
   4   4   7  124.43    6.03 
   4   4   7  121.63    6.73 
  -4   4  -7  135.54    7.34 
   4   4   7  132.05    6.70 
  -4   4  -7  144.09    7.37 
  -4   4  -8  419.90   17.61 
   4   4   8  431.53   17.59 
   4   4   8  399.13   17.05 
   4   4   8  436.93   17.74 
  -4   4  -8  416.31   18.19 
  -4   4  -8  416.55   18.22 
  -4   4  -9   22.49    2.63 
   4   4   9   21.66    1.75 
   4   4   9   20.43    2.86 
   4   4   9   20.36    2.66 
  -4   4  -9   19.09    3.80 
  -4   4 -10   28.96    2.66 
   4   4  10   27.81    2.76 
   4   4  10   28.72    2.68 
  -4   4 -10   28.58    3.85 
   4   4  11   58.39    3.46 
   4   4  11   63.49    3.73 
  -4   4 -11   57.81    4.74 
  -4   4 -11   59.10    4.87 
   4   4  12   49.37    2.81 
   4   4  12   52.87    3.15 
  -4   4 -12   50.23    4.16 
   4   4  13   30.04    1.76 
  -4   4 -13   25.73    3.18 
  -4   5  14   -0.24    1.01 
  -4   5  13   10.31    1.64 
   4   5 -13   10.87    1.92 
   4   5 -13   12.66    2.28 
   4   5 -12   52.20    3.65 
   4   5 -12   61.68    4.09 
   4   5 -11   32.60    3.28 
   4   5 -11   26.51    3.19 
  -4   5  11   30.85    2.76 
  -4   5  11   24.03    2.46 
   4   5 -10   26.34    3.48 
  -4   5  10   22.78    2.71 
   4   5 -10   27.52    3.54 
  -4   5  10   29.21    2.71 
  -4   5   9   78.35    4.91 
  -4   5   9   93.60    5.13 
   4   5  -9   88.11    5.57 
   4   5  -8   30.66    2.71 
  -4   5   8   31.20    3.33 
   4   5  -8   35.80    3.54 
  -4   5   8   32.30    3.60 
  -4   5   7  241.65   10.53 
   4   5  -7  264.89   11.77 
   4   5  -7  254.36   11.07 
  -4   5   7  260.52   11.45 
  -4   5   7  266.46   11.62 
   4   5  -7  252.73   11.43 
  -4   5   6  155.34    7.08 
   4   5  -6  175.71    8.26 
   4   5  -6  164.36    7.64 
   4   5  -6  159.22    7.75 
  -4   5   6  154.26    7.91 
  -4   5   6  161.83    8.08 
  -4   5   5  219.15    9.49 
   4   5  -5  227.67   10.28 
   4   5  -5  205.35    9.56 
   4   5  -5  231.05   10.01 
   4   5  -5  231.06    9.81 
  -4   5   5  207.76   10.15 
  -4   5   4  382.73   15.45 
   4   5  -4  389.48   15.92 
   4   5  -4  351.02   15.53 
   4   5  -4  371.81   15.87 
   4   5  -4  371.22   15.45 
  -4   5   4  359.07   15.91 
  -4   5   3   24.78    2.53 
   4   5  -3   18.30    2.53 
   4   5  -3   21.51    2.45 
   4   5  -3   23.32    3.01 
   4   5  -3   19.88    2.32 
  -4   5   3   24.41    2.80 
   4   5  -3   22.86    2.46 
  -4   5   2   33.67    2.81 
   4   5  -2   27.56    2.60 
   4   5  -2   33.22    3.29 
   4   5  -2   28.87    3.46 
   4   5  -2   28.29    2.47 
  -4   5   2   32.47    3.01 
   4   5  -2   29.89    2.88 
  -4   5   1  204.52    8.75 
   4   5  -1  183.61    8.40 
   4   5  -1  197.58    8.47 
   4   5  -1  188.28    9.07 
  -4   5   1  176.77    8.77 
   4   5  -1  188.55    8.78 
  -4   5   0  185.73    8.74 
   4   5   0  177.87    8.23 
   4   5   0  201.42    9.15 
   4   5   0  194.68    9.09 
   4   5   0  197.94    8.87 
  -4   5   0  182.89    8.77 
   4   5   0  196.51    8.38 
  -4   5  -1  411.26   17.46 
   4   5   1  408.55   17.67 
   4   5   1  406.02   17.66 
   4   5   1  433.25   17.44 
  -4   5  -1  425.16   17.44 
   4   5   1  405.02   17.00 
   4   5   1  420.18   17.69 
   4   5   2  284.52   12.39 
   4   5   2  276.85   12.31 
  -4   5  -2  287.93   12.23 
   4   5   2  274.83   11.74 
   4   5   2  283.03   12.56 
   4   5   3    4.13    2.44 
  -4   5  -3    2.33    2.50 
  -4   5  -3    3.52    2.20 
   4   5   3    3.58    2.19 
  -4   5  -3    0.29    1.95 
   4   5   3    1.46    1.21 
   4   5   3    0.12    2.62 
  -4   5  -3    1.13    1.83 
   4   5   4   22.20    3.06 
  -4   5  -4   21.08    2.96 
   4   5   4   21.14    2.39 
   4   5   4   21.68    2.99 
  -4   5  -4   22.09    2.81 
  -4   5  -4   22.94    2.49 
  -4   5  -4   21.22    2.60 
   4   5   5  108.08    5.32 
   4   5   5  101.21    5.74 
  -4   5  -5  103.01    5.71 
  -4   5  -5  106.08    5.91 
  -4   5  -5  108.06    5.75 
  -4   5  -6  371.40   16.17 
   4   5   6  379.16   15.79 
   4   5   6  397.14   16.28 
  -4   5  -6  378.19   16.44 
  -4   5  -6  387.80   16.37 
  -4   5  -7  243.44   10.34 
   4   5   7  231.01    9.79 
   4   5   7  228.78   10.02 
   4   5   7  228.64   10.35 
  -4   5  -7  219.68   10.52 
  -4   5  -7  234.15   10.70 
   4   5   7  231.67   10.29 
  -4   5  -8   28.02    2.71 
   4   5   8   26.23    1.81 
   4   5   8   27.49    2.10 
  -4   5  -8   27.91    3.50 
   4   5   8   25.96    2.65 
   4   5   8   26.68    2.59 
  -4   5  -8   21.48    3.20 
  -4   5  -9    5.78    1.85 
   4   5   9    4.98    1.28 
   4   5   9    1.33    1.79 
   4   5   9    4.32    1.62 
  -4   5  -9    6.36    2.88 
  -4   5  -9    7.50    2.61 
   4   5  10   56.43    2.86 
   4   5  10   65.46    3.42 
  -4   5 -10   68.25    4.20 
   4   5  10   61.11    3.22 
   4   5  11   20.96    1.66 
   4   5  11   17.15    1.43 
  -4   5 -11   16.62    2.50 
   4   5  12  113.38    4.50 
  -4   5 -12   84.30    4.85 
   4   6 -11   25.98    2.17 
   4   6 -11   23.55    1.96 
  -4   6  10    8.87    1.29 
   4   6 -10    6.16    1.77 
  -4   6  10    6.85    1.47 
  -4   6   9   67.77    3.68 
   4   6  -9   66.80    4.26 
   4   6  -9   68.29    3.88 
  -4   6   9   74.71    3.66 
   4   6  -8   10.19    2.74 
   4   6  -8    6.31    1.79 
  -4   6   8    7.47    1.82 
  -4   6   8    5.34    1.75 
   4   6  -7    6.47    2.54 
   4   6  -7    6.72    1.78 
  -4   6   7    7.80    1.95 
   4   6  -7    7.57    1.65 
  -4   6   7    5.70    1.95 
  -4   6   6  112.94    5.31 
   4   6  -6  130.26    6.34 
   4   6  -6  122.84    5.83 
  -4   6   6  120.32    5.94 
  -4   6   6  119.61    5.93 
  -4   6   5   59.26    3.22 
   4   6  -5   52.97    3.16 
   4   6  -5   62.41    3.89 
   4   6  -5   56.04    3.57 
  -4   6   5   56.06    3.64 
  -4   6   5   60.58    3.96 
  -4   6   4   31.73    2.36 
   4   6  -4   31.37    3.02 
   4   6  -4   36.09    2.81 
  -4   6   4   29.61    3.08 
  -4   6   3  102.55    5.17 
   4   6  -3  107.96    5.23 
   4   6  -3  111.93    5.75 
  -4   6   3   98.48    5.52 
  -4   6   2   38.32    2.84 
   4   6  -2   33.05    2.42 
   4   6  -2   35.62    3.11 
  -4   6   2   34.84    3.11 
  -4   6   1    8.01    1.94 
   4   6  -1    8.36    2.41 
   4   6  -1    9.10    1.62 
  -4   6   1   12.32    2.56 
   4   6  -1   10.95    2.18 
  -4   6   0   10.74    2.29 
   4   6   0   15.84    2.64 
   4   6   0    8.52    2.29 
   4   6   0    9.19    1.52 
  -4   6   0    9.66    2.38 
   4   6   0   10.20    2.24 
  -4   6   0    8.86    1.98 
  -4   6  -1   82.95    5.13 
   4   6   1   97.43    5.36 
   4   6   1  102.59    5.21 
   4   6   1   93.27    4.46 
  -4   6  -1   96.43    5.06 
   4   6   1   91.59    5.14 
   4   6   2   42.39    3.56 
   4   6   2   49.03    3.31 
  -4   6  -2   50.23    3.39 
   4   6   2   49.24    2.66 
   4   6   2   49.80    3.55 
   4   6   3  190.22    8.46 
  -4   6  -3  187.80    8.54 
   4   6   3  189.32    8.74 
  -4   6  -3  195.32    8.74 
  -4   6  -4   19.65    2.65 
   4   6   4   27.79    2.19 
   4   6   4   25.31    2.41 
   4   6   4   28.07    2.71 
  -4   6  -5   37.24    3.01 
   4   6   5   34.20    2.57 
   4   6   5   32.73    2.17 
   4   6   5   33.30    2.55 
  -4   6  -6  209.21    8.76 
   4   6   6  205.75    8.48 
   4   6   6  187.04    8.18 
  -4   6  -7   29.24    2.38 
   4   6   7   30.14    1.97 
   4   6   7   31.74    2.15 
   4   6   7   30.35    2.15 
   4   6   8  181.66    7.06 
   4   6   8  161.09    6.87 
   4   6   8  180.24    7.07 
  -4   6  -9   56.52    3.58 
   4   6   9   58.19    2.69 
  -4   7   6   47.83    2.39 
  -4   7   5   27.99    1.82 
  -4   7   4   35.83    1.93 
  -4   7   4   41.22    2.30 
  -4   7   3  101.67    4.72 
   4   7  -3  118.90    5.09 
   4   7  -3  103.90    4.70 
  -4   7   3  112.18    4.96 
  -4   7   2   38.58    2.27 
   4   7  -2   36.01    2.26 
  -4   7   2   40.88    2.40 
   4   7  -1   21.61    1.82 
  -4   7   1   18.59    1.71 
   4   7  -1   22.36    1.87 
  -4   7   1   22.26    1.83 
  -4   7   0    0.80    1.31 
   4   7   0    0.21    1.16 
  -4   7   0   -1.43    1.21 
  -4   7  -1   81.47    4.09 
   4   7   1   87.33    3.96 
   4   7   2   76.26    3.50 
  -4   7  -3  200.03    7.49 
   4   7   3  160.86    7.04 
  -4   7  -4  129.45    5.66 
  -5  -7   5   71.65    3.51 
  -5  -7   5   73.21    3.55 
  -5  -7   4    5.22    1.36 
  -5  -7   3   24.63    2.11 
  -5  -7   3   25.25    2.17 
  -5  -7   2   33.40    2.49 
  -5  -7   1   35.16    2.59 
  -5  -7   0   14.39    1.87 
  -5  -7  -1   49.95    2.98 
  -5  -7  -1   51.87    3.11 
  -5  -7  -2   12.54    1.68 
  -5  -6  10    3.49    1.39 
  -5  -6  10    5.47    1.41 
  -5  -6   9   36.35    2.69 
  -5  -6   9   37.99    2.71 
  -5  -6   8    8.06    1.52 
  -5  -6   8    8.13    2.19 
  -5  -6   8    8.07    2.28 
  -5  -6   7   24.36    2.89 
  -5  -6   7   17.41    2.06 
  -5  -6   6   60.54    4.33 
  -5  -6   6   50.81    3.49 
  -5  -6   6   63.74    4.28 
  -5  -6   5  216.16    9.53 
  -5  -6   5  184.12    8.69 
  -5  -6   4   53.09    4.47 
  -5  -6   4   50.48    3.67 
  -5  -6   3    0.82    3.08 
  -5  -6   3    2.59    3.50 
  -5  -6   3    2.69    2.67 
  -5  -6   2    8.08    3.34 
  -5  -6   2    8.74    3.15 
  -5  -6   2    6.62    3.01 
  -5  -6   2   11.65    3.59 
  -5  -6   1  196.68    9.42 
  -5  -6   1  185.92    9.47 
  -5  -6   1  188.69    9.31 
  -5  -6   1  194.19    9.57 
  -5  -6   0  263.12   12.19 
  -5  -6   0  268.84   12.23 
  -5  -6   0  268.47   12.26 
  -5  -6   0  252.63   12.19 
  -5  -6  -1  172.08    8.81 
  -5  -6  -1  175.08    8.90 
   5  -6   2   16.93    2.09 
  -5  -6  -2   20.29    3.71 
  -5  -6  -2   22.78    3.84 
  -5  -6  -3   49.79    4.61 
  -5  -6  -3   42.94    4.23 
  -5  -6  -3   46.34    4.19 
  -5  -6  -4   19.59    3.22 
  -5  -6  -4   19.07    3.42 
  -5  -6  -4   23.58    3.83 
   5  -6   4   22.96    2.87 
  -5  -6  -5    9.01    2.81 
  -5  -6  -5    4.49    2.51 
   5  -6   5   11.33    2.28 
  -5  -6  -6   24.80    2.73 
  -5  -6  -6   24.22    2.93 
  -5  -6  -6   18.34    2.17 
   5  -6   6   22.70    2.12 
   5  -6   6   26.25    2.33 
   5  -6   7   25.90    2.11 
  -5  -6  -7   25.27    2.62 
  -5  -6  -7   20.38    2.16 
   5  -6   7   29.57    2.03 
  -5  -6  -7   21.75    2.87 
   5  -6   7   28.56    2.01 
  -5  -6  -7   16.85    1.91 
  -5  -6  -8   50.89    3.13 
   5  -6   8   53.45    2.71 
  -5  -6  -8   49.88    3.41 
   5  -6   8   58.60    2.88 
  -5  -5  14   21.47    1.58 
  -5  -5  13  107.36    4.91 
  -5  -5  13  102.60    4.77 
   5  -5 -12   36.69    2.95 
  -5  -5  12   45.96    2.95 
  -5  -5  12   45.41    3.02 
  -5  -5  11  101.08    5.32 
  -5  -5  11   95.97    5.22 
  -5  -5  10    1.40    2.42 
  -5  -5  10    3.23    1.76 
  -5  -5  10   -0.41    2.66 
  -5  -5   9   65.65    3.93 
  -5  -5   9   58.24    4.52 
  -5  -5   9   57.94    4.46 
  -5  -5   8  167.63    8.10 
  -5  -5   8  175.15    8.71 
  -5  -5   7   49.13    4.53 
  -5  -5   7   51.66    4.68 
  -5  -5   7   41.34    3.47 
  -5  -5   6  309.11   13.41 
  -5  -5   6  267.78   12.72 
  -5  -5   5    8.95    3.09 
  -5  -5   5    5.08    3.70 
  -5  -5   4  136.63    7.66 
  -5  -5   4  120.40    7.38 
  -5  -5   4  143.62    7.40 
  -5  -5   4  113.15    7.63 
  -5  -5   3  302.33   14.03 
  -5  -5   3  301.13   13.91 
  -5  -5   3  306.45   14.02 
  -5  -5   3  302.23   14.12 
  -5  -5   2  297.23   13.66 
  -5  -5   2  302.04   13.65 
  -5  -5   2  278.46   13.78 
  -5  -5   1   22.78    4.20 
  -5  -5   1   17.40    4.06 
  -5  -5   0  141.38    7.89 
  -5  -5   0  131.77    6.90 
  -5  -5   0  148.97    7.95 
  -5  -5  -1  140.03    7.05 
  -5  -5  -1  129.98    7.91 
  -5  -5  -1  142.55    7.85 
  -5  -5  -1  136.00    7.97 
  -5  -5  -2  128.41    6.75 
  -5  -5  -2  120.13    7.11 
  -5  -5  -2  124.09    7.59 
  -5  -5  -3  101.57    6.40 
  -5  -5  -3   94.28    6.41 
  -5  -5  -4  112.09    7.02 
   5  -5   4  123.31    6.17 
  -5  -5  -4  109.81    7.02 
  -5  -5  -5    5.44    3.98 
   5  -5   5    7.49    2.15 
  -5  -5  -5    2.86    3.50 
  -5  -5  -5    3.97    2.11 
  -5  -5  -5    5.63    4.23 
   5  -5   5    4.63    2.92 
  -5  -5  -6   16.94    4.04 
  -5  -5  -6   16.88    2.60 
   5  -5   6   17.57    2.29 
  -5  -5  -6   15.41    3.59 
  -5  -5  -6   11.60    4.10 
   5  -5   6   17.70    3.01 
  -5  -5  -7   67.83    4.48 
  -5  -5  -7   75.78    5.80 
   5  -5   7   84.75    4.23 
  -5  -5  -7   69.63    5.29 
  -5  -5  -7   74.14    5.72 
   5  -5   7   84.16    4.89 
   5  -5   8   17.27    2.67 
  -5  -5  -8   19.49    3.27 
  -5  -5  -8   13.44    2.47 
   5  -5   8   19.93    2.59 
  -5  -5  -8   20.64    3.75 
   5  -5   8   20.04    2.54 
   5  -5   9   49.19    3.35 
  -5  -5  -9   37.98    3.52 
  -5  -5  -9   44.14    3.35 
   5  -5   9   52.23    3.31 
  -5  -5  -9   49.38    4.20 
   5  -5   9   51.11    3.21 
  -5  -5 -10   28.54    3.13 
  -5  -5 -10   20.24    2.42 
   5  -5  10   31.50    2.68 
   5  -5  10   32.06    2.43 
  -5  -5 -10   21.25    2.38 
   5  -5  10   28.20    2.26 
  -5  -5 -10   27.50    3.16 
   5  -5  10   26.70    2.07 
   5  -5  11   35.98    2.30 
   5  -5  11   34.74    2.09 
   5  -5  11   30.31    2.01 
   5  -5  11   34.18    2.17 
  -5  -4  16   44.04    2.26 
   5  -4 -16   34.73    2.55 
   5  -4 -15   10.02    1.81 
   5  -4 -15   10.07    2.12 
  -5  -4  15    7.42    1.33 
  -5  -4  14   18.72    2.11 
   5  -4 -14   18.12    2.48 
   5  -4 -14   14.94    2.77 
  -5  -4  14   16.51    2.14 
   5  -4 -13  116.93    6.14 
  -5  -4  13  125.68    6.26 
  -5  -4  13  125.37    6.16 
   5  -4 -12   70.58    4.34 
  -5  -4  12   66.78    4.48 
  -5  -4  12   64.80    4.43 
  -5  -4  11   60.95    4.31 
  -5  -4  11   56.15    3.72 
  -5  -4  11   54.97    3.51 
  -5  -4  11   55.17    4.28 
  -5  -4  10  120.07    6.04 
  -5  -4  10  121.02    6.21 
  -5  -4  10  123.43    6.87 
  -5  -4  10  118.05    6.65 
  -5  -4   9  122.91    6.83 
  -5  -4   9  129.78    6.56 
  -5  -4   9  127.63    6.32 
  -5  -4   9  125.37    7.18 
  -5  -4   8   70.50    5.33 
  -5  -4   8   58.42    4.22 
  -5  -4   8   68.71    4.16 
  -5  -4   8   75.74    5.10 
  -5  -4   7  192.07    9.22 
  -5  -4   7  164.16    8.74 
  -5  -4   7  174.37    8.22 
  -5  -4   6  285.35   12.90 
  -5  -4   6  267.13   12.71 
  -5  -4   5  239.64   11.81 
  -5  -4   5  246.18   11.69 
  -5  -4   5  251.46   11.81 
  -5  -4   4  163.26    8.68 
  -5  -4   4  159.25    8.62 
  -5  -4   4  165.05    8.65 
  -5  -4   4  167.05    8.73 
  -5  -4   3   43.02    3.46 
  -5  -4   3   44.30    4.55 
  -5  -4   3   35.68    4.14 
  -5  -4   2   17.71    3.83 
  -5  -4   2   18.32    3.79 
  -5  -4   2   15.44    2.81 
  -5  -4   1  612.08   25.25 
  -5  -4   1  602.00   25.57 
  -5  -4   1  647.50   25.83 
  -5  -4   1  597.09   25.63 
  -5  -4   0  233.22   11.08 
  -5  -4   0  229.28   10.31 
  -5  -4   0  255.53   11.61 
  -5  -4  -1   30.62    3.81 
  -5  -4  -1   32.87    3.95 
  -5  -4  -1   30.50    2.95 
  -5  -4  -2   21.31    3.67 
  -5  -4  -2   18.45    3.64 
  -5  -4  -2   24.10    2.86 
  -5  -4  -3   17.23    3.91 
  -5  -4  -3   20.51    2.88 
  -5  -4  -3   19.55    4.10 
  -5  -4  -4  183.08    9.68 
  -5  -4  -4  192.96    9.08 
   5  -4   4  196.35    8.94 
  -5  -4  -4  181.96    9.88 
  -5  -4  -5  100.78    5.88 
   5  -4   5  108.42    5.60 
  -5  -4  -5   99.25    6.85 
   5  -4   5   96.57    5.92 
  -5  -4  -6  283.28   13.20 
   5  -4   6  278.69   12.24 
  -5  -4  -6  270.99   12.63 
  -5  -4  -6  278.60   13.40 
   5  -4   6  282.62   12.68 
  -5  -4  -7    9.08    4.30 
  -5  -4  -7    6.59    4.00 
   5  -4   7   12.28    2.28 
  -5  -4  -7   13.35    3.50 
  -5  -4  -7   13.39    4.31 
   5  -4   7    9.39    2.89 
   5  -4   8   40.23    3.84 
  -5  -4  -8   38.89    5.01 
  -5  -4  -8   31.60    4.90 
  -5  -4  -8   46.07    4.51 
   5  -4   8   43.07    3.26 
   5  -4   8   49.15    3.96 
  -5  -4  -8   35.55    4.63 
   5  -4   8   45.07    3.78 
  -5  -4  -9   98.35    6.50 
  -5  -4  -9   91.58    6.00 
   5  -4   9   96.77    5.44 
  -5  -4  -9   77.77    6.09 
   5  -4   9   92.42    5.37 
   5  -4   9   94.66    5.46 
  -5  -4 -10   33.90    4.30 
  -5  -4 -10   31.46    4.10 
  -5  -4 -10   27.28    3.99 
   5  -4  10   33.13    3.03 
   5  -4  10   34.39    3.05 
   5  -4  10   32.40    3.40 
   5  -4  11   57.25    3.68 
  -5  -4 -11   47.52    4.57 
  -5  -4 -11   57.39    4.53 
   5  -4  11   55.86    3.53 
   5  -4  11   54.58    3.80 
   5  -4  11   53.77    3.49 
  -5  -4 -11   42.82    3.89 
  -5  -4 -12   14.13    2.80 
   5  -4  12   15.91    2.19 
  -5  -4 -12   19.48    2.99 
   5  -4  12   16.07    2.00 
   5  -4  12   17.55    2.13 
   5  -4  12   16.96    1.86 
   5  -4  13   69.15    3.32 
   5  -4  13   66.91    3.21 
   5  -4  13   57.72    2.98 
  -5  -4 -13   62.02    3.79 
   5  -3 -17   24.05    2.47 
   5  -3 -17   28.81    2.34 
   5  -3 -16   57.07    3.41 
   5  -3 -16   55.43    3.88 
   5  -3 -16   56.72    4.04 
  -5  -3  16   60.66    3.26 
   5  -3 -15   59.64    3.85 
   5  -3 -15   58.12    4.35 
  -5  -3  15   62.83    3.73 
  -5  -3  14   17.73    2.59 
   5  -3 -14   11.77    2.56 
   5  -3 -14    8.23    3.02 
   5  -3 -14   13.70    2.18 
  -5  -3  14   13.75    2.52 
  -5  -3  13   35.97    3.36 
   5  -3 -13   32.15    3.26 
  -5  -3  13   36.90    2.87 
   5  -3 -13   28.67    2.77 
  -5  -3  13   34.45    3.60 
  -5  -3  12   32.98    3.44 
  -5  -3  12   37.86    3.17 
   5  -3 -12   33.23    2.88 
  -5  -3  12   34.62    3.55 
  -5  -3  11   71.97    4.69 
  -5  -3  11   73.59    4.34 
  -5  -3  11   78.90    5.05 
  -5  -3  11   69.25    4.70 
  -5  -3  10  136.67    6.74 
  -5  -3  10  137.02    6.32 
  -5  -3  10  136.16    6.64 
  -5  -3  10  130.41    7.31 
  -5  -3  10  131.92    7.05 
  -5  -3   9   13.79    3.06 
  -5  -3   9   15.36    2.22 
  -5  -3   9   18.61    2.58 
  -5  -3   9   17.56    2.43 
  -5  -3   8   65.07    3.93 
  -5  -3   8   58.62    3.82 
  -5  -3   8   61.95    4.50 
  -5  -3   7   58.38    4.62 
  -5  -3   7   52.04    4.38 
  -5  -3   7   47.36    3.52 
  -5  -3   6   82.23    5.10 
  -5  -3   6   81.15    4.56 
  -5  -3   6   70.88    5.12 
  -5  -3   5  105.42    5.99 
  -5  -3   5  108.19    5.64 
  -5  -3   5  106.14    6.24 
  -5  -3   5  113.81    6.32 
  -5  -3   4  317.47   14.33 
  -5  -3   4  323.84   14.04 
  -5  -3   4  339.19   14.46 
  -5  -3   4  348.33   14.62 
  -5  -3   3 1383.87   52.35 
  -5  -3   3 1310.77   52.03 
  -5  -3   3 1294.82   52.43 
  -5  -3   3 1433.02   52.72 
  -5  -3   3 1289.72   52.51 
  -5  -3   2 1030.13   41.97 
  -5  -3   2 1045.10   42.34 
   5  -3  -2 1077.38   43.98 
  -5  -3   2 1015.46   42.47 
  -5  -3   2 1109.55   42.46 
  -5  -3   2 1091.94   42.30 
  -5  -3   1  135.76    6.47 
  -5  -3   1  141.04    6.94 
   5  -3  -1  139.83    8.01 
  -5  -3   1  140.02    6.91 
  -5  -3   0  127.04    6.54 
  -5  -3   0  127.04    6.50 
  -5  -3   0  128.47    6.92 
   5  -3   0  140.98    7.71 
  -5  -3   0  132.75    6.31 
  -5  -3  -1    9.10    2.72 
  -5  -3  -1    7.07    2.07 
  -5  -3  -1    7.35    2.80 
  -5  -3  -2  418.85   17.62 
  -5  -3  -2  428.58   18.01 
  -5  -3  -3   50.95    4.30 
  -5  -3  -3   59.30    4.23 
  -5  -3  -3   48.61    3.61 
  -5  -3  -4  232.19   10.29 
  -5  -3  -4  249.71   11.14 
  -5  -3  -4  240.64   11.10 
  -5  -3  -4  229.32   10.27 
   5  -3   4  244.78   10.47 
  -5  -3  -4  235.74   10.73 
  -5  -3  -4  240.73   11.13 
  -5  -3  -5  190.83    8.62 
  -5  -3  -5  188.50    9.45 
  -5  -3  -5  182.95    8.64 
  -5  -3  -5  200.07    9.20 
   5  -3   5  203.42    8.78 
  -5  -3  -5  198.53    9.50 
   5  -3   5  173.86    8.91 
  -5  -3  -6  343.52   15.23 
  -5  -3  -6  354.53   16.02 
  -5  -3  -6  371.02   15.40 
   5  -3   6  390.55   15.43 
  -5  -3  -6  345.72   15.94 
  -5  -3  -6  349.32   15.82 
   5  -3   6  366.36   15.65 
  -5  -3  -7  763.31   32.06 
  -5  -3  -7  790.01   32.75 
  -5  -3  -7  777.58   32.21 
   5  -3   7  805.19   32.11 
  -5  -3  -7  809.50   32.62 
  -5  -3  -7  768.24   32.67 
   5  -3   7  845.12   32.47 
  -5  -3  -8   58.85    4.99 
  -5  -3  -8   50.30    5.33 
  -5  -3  -8   57.64    4.33 
  -5  -3  -8   64.01    5.30 
   5  -3   8   57.69    4.47 
  -5  -3  -8   50.56    4.76 
   5  -3   8   57.31    4.27 
  -5  -3  -8   53.13    4.05 
   5  -3   8   57.77    4.58 
  -5  -3  -9  121.80    7.28 
  -5  -3  -9  121.51    6.57 
  -5  -3  -9  134.44    7.88 
  -5  -3  -9  128.89    7.75 
  -5  -3  -9  119.30    6.76 
   5  -3   9  129.01    6.76 
  -5  -3  -9  117.88    7.03 
   5  -3   9  134.13    6.78 
   5  -3   9  120.65    6.93 
  -5  -3 -10  265.26   12.11 
  -5  -3 -10  266.79   12.68 
  -5  -3 -10  292.83   13.16 
  -5  -3 -10  276.69   12.45 
  -5  -3 -10  234.38   12.21 
   5  -3  10  267.84   12.19 
   5  -3  10  282.34   12.08 
   5  -3  10  286.47   12.38 
   5  -3  11   13.67    3.05 
  -5  -3 -11    8.90    2.67 
  -5  -3 -11   14.37    3.67 
  -5  -3 -11   21.06    4.00 
  -5  -3 -11   14.24    3.37 
   5  -3  11   14.22    2.88 
  -5  -3 -11   10.22    2.76 
   5  -3  11   14.12    2.65 
  -5  -3 -12  112.75    6.24 
   5  -3  12  120.64    6.45 
  -5  -3 -12  110.03    6.58 
   5  -3  12  132.49    6.18 
  -5  -3 -12  116.66    6.61 
   5  -3  12  125.04    6.05 
   5  -3  12  133.97    6.31 
  -5  -3 -13    0.94    2.06 
  -5  -3 -13    4.62    2.36 
  -5  -3 -13   -0.12    3.25 
   5  -3  13   -0.24    2.09 
   5  -3  13    2.21    1.86 
   5  -3  13    0.64    1.54 
  -5  -3 -14   17.64    2.74 
   5  -3  14   14.29    1.77 
   5  -3  14   15.47    1.73 
   5  -3  14   15.41    1.38 
   5  -2 -18   46.87    3.06 
   5  -2 -18   54.11    3.29 
   5  -2 -17    3.48    2.31 
  -5  -2  17    3.52    1.53 
   5  -2 -16   44.32    3.82 
   5  -2 -16   45.65    3.55 
  -5  -2  16   47.50    3.28 
   5  -2 -15   17.62    3.12 
  -5  -2  15   16.09    2.87 
   5  -2 -15   15.75    2.95 
  -5  -2  15   25.61    3.00 
   5  -2 -14   87.14    5.72 
  -5  -2  14   88.50    5.63 
   5  -2 -14   95.82    5.46 
  -5  -2  14  104.40    5.58 
  -5  -2  13  411.24   17.11 
   5  -2 -13  407.37   17.17 
   5  -2 -13  397.01   16.79 
  -5  -2  13  393.29   17.30 
  -5  -2  13  407.85   17.15 
  -5  -2  12  343.17   14.26 
   5  -2 -12  321.68   13.72 
  -5  -2  12  325.88   14.27 
  -5  -2  12  312.28   14.07 
  -5  -2  11  126.17    6.91 
   5  -2 -11  131.82    6.17 
  -5  -2  11  129.83    6.14 
  -5  -2  11  128.55    7.01 
  -5  -2  11  126.60    6.68 
  -5  -2  10  343.76   15.46 
  -5  -2  10  351.94   15.12 
  -5  -2  10  370.75   14.96 
  -5  -2  10  363.84   15.06 
  -5  -2  10  350.68   15.29 
  -5  -2   9    5.15    2.39 
  -5  -2   9    7.58    1.95 
  -5  -2   9   11.48    2.19 
  -5  -2   9   10.59    2.42 
  -5  -2   9   10.02    2.01 
  -5  -2   8   62.53    4.01 
  -5  -2   8   62.50    3.63 
  -5  -2   8   65.29    4.26 
  -5  -2   8   65.57    4.01 
  -5  -2   7  344.82   14.38 
  -5  -2   7  316.90   14.57 
  -5  -2   7  343.51   14.39 
  -5  -2   6  177.56    8.22 
   5  -2  -6  161.95    8.83 
  -5  -2   6  169.19    8.01 
  -5  -2   6  170.73    8.34 
  -5  -2   6  185.55    7.99 
  -5  -2   5    1.23    1.89 
   5  -2  -5    0.78    1.34 
  -5  -2   5    0.39    2.42 
   5  -2  -5    2.44    1.48 
  -5  -2   5    0.08    1.97 
  -5  -2   5    5.01    3.16 
  -5  -2   5    1.48    1.68 
  -5  -2   4  541.72   22.93 
  -5  -2   4  474.65   20.90 
  -5  -2   4  492.03   20.75 
   5  -2  -4  513.64   21.72 
   5  -2  -4  486.37   21.19 
  -5  -2   4  523.53   20.77 
  -5  -2   4  530.18   23.50 
  -5  -2   4  504.61   20.56 
  -5  -2   4  485.62   23.15 
  -5  -2   4  511.68   20.82 
  -5  -2   4  541.33   20.58 
   5  -2  -4  481.20   21.77 
  -5  -2   4  509.58   20.86 
  -5  -2   3   88.67    6.09 
  -5  -2   3   76.96    4.29 
   5  -2  -3   80.87    4.36 
  -5  -2   3   78.53    4.46 
  -5  -2   3   80.86    4.22 
   5  -2  -3   82.18    4.64 
  -5  -2   3   82.77    4.46 
  -5  -2   3   75.81    6.21 
  -5  -2   3   89.41    4.08 
  -5  -2   3   78.55    4.42 
   5  -2  -3   75.78    4.85 
   5  -2  -3   73.24    4.33 
   5  -2  -2  975.14   39.60 
  -5  -2   2 1038.89   41.14 
  -5  -2   2  993.21   38.99 
  -5  -2   2 1017.12   41.11 
   5  -2  -2  924.61   39.07 
  -5  -2   2  976.73   38.78 
   5  -2  -2  911.71   40.31 
   5  -2  -2  977.38   39.08 
  -5  -2   2 1004.26   38.94 
  -5  -2   2  819.25   40.98 
  -5  -2   2  996.49   39.11 
   5  -2  -2  954.97   39.64 
  -5  -2   2 1032.56   38.98 
   5  -2  -1   36.00    3.58 
   5  -2  -1   38.02    3.35 
  -5  -2   1   42.75    2.75 
  -5  -2   1   38.81    4.03 
  -5  -2   1   41.38    2.87 
  -5  -2   1   35.72    4.15 
  -5  -2   1   40.20    4.56 
  -5  -2   1   41.56    3.15 
   5  -2  -1   37.52    3.78 
  -5  -2   1   38.09    2.69 
   5  -2  -1   37.27    2.92 
   5  -2  -1   37.48    2.49 
   5  -2  -1   40.24    2.53 
  -5  -2   0  492.04   20.12 
   5  -2   0  478.94   21.51 
   5  -2   0  558.64   22.40 
  -5  -2   0  525.12   22.59 
  -5  -2   0  471.06   20.39 
   5  -2   0  509.07   21.04 
  -5  -2   0  520.58   20.36 
  -5  -2   0  524.17   20.36 
   5  -2   0  462.09   21.11 
   5  -2   0  484.26   20.39 
  -5  -2   0  482.47   22.67 
  -5  -2   0  513.83   20.53 
   5  -2   0  505.30   20.25 
  -5  -2  -1  205.15    8.27 
   5  -2   1  182.07    9.63 
  -5  -2  -1  194.86    8.55 
  -5  -2  -1  202.17   10.57 
   5  -2   1  204.07    8.86 
  -5  -2  -1  197.50    8.46 
   5  -2   1  208.11   10.13 
  -5  -2  -1  186.31    8.61 
  -5  -2  -2  397.90   16.05 
  -5  -2  -2  341.14   17.36 
   5  -2   2  353.62   17.60 
  -5  -2  -2  408.18   16.35 
   5  -2   2  379.60   16.87 
  -5  -2  -2  409.14   18.65 
  -5  -2  -2  389.24   16.03 
  -5  -2  -2  418.56   16.31 
  -5  -2  -2  392.87   16.38 
   5  -2   2  402.59   17.91 
  -5  -2  -3   41.77    2.88 
  -5  -2  -3   44.80    3.95 
  -5  -2  -3   40.87    3.22 
   5  -2   3   43.99    3.37 
  -5  -2  -3   44.94    2.91 
   5  -2   3   42.21    4.07 
  -5  -2  -3   47.02    3.28 
  -5  -2  -3   45.73    3.32 
  -5  -2  -4   26.07    2.99 
  -5  -2  -4   35.18    3.25 
  -5  -2  -4   30.52    2.60 
  -5  -2  -4   27.58    2.52 
  -5  -2  -4   30.75    2.95 
   5  -2   4   28.93    2.44 
  -5  -2  -4   27.64    2.95 
  -5  -2  -5  510.66   21.07 
  -5  -2  -5  516.44   21.34 
  -5  -2  -5  517.81   21.43 
  -5  -2  -5  510.02   21.15 
   5  -2   5  517.90   21.10 
  -5  -2  -6  484.32   20.44 
  -5  -2  -6  478.45   20.66 
  -5  -2  -6  491.30   20.83 
   5  -2   6  502.10   20.22 
  -5  -2  -6  503.98   20.58 
   5  -2   6  508.45   20.45 
   5  -2   6  486.24   20.40 
  -5  -2  -7  446.67   19.47 
  -5  -2  -7  432.24   19.57 
  -5  -2  -7  462.66   19.89 
  -5  -2  -7  474.35   19.67 
   5  -2   7  475.26   19.40 
   5  -2   7  482.57   19.44 
   5  -2   7  475.54   19.50 
  -5  -2  -8   40.99    3.89 
  -5  -2  -8   42.06    4.05 
  -5  -2  -8   43.90    4.61 
  -5  -2  -8   32.95    3.97 
   5  -2   8   43.20    4.26 
  -5  -2  -8   37.84    4.51 
   5  -2   8   35.94    3.76 
   5  -2   8   39.73    3.43 
   5  -2   8   48.04    3.95 
   5  -2   9   41.66    3.97 
  -5  -2  -9   33.84    3.84 
  -5  -2  -9   32.55    4.30 
  -5  -2  -9   40.94    4.59 
  -5  -2  -9   37.53    4.65 
   5  -2   9   42.65    4.30 
   5  -2   9   39.79    3.62 
  -5  -2  -9   35.58    3.57 
   5  -2   9   42.91    3.62 
  -5  -2 -10  101.06    6.40 
  -5  -2 -10   96.09    6.12 
  -5  -2 -10  100.96    6.63 
  -5  -2 -10   95.55    6.61 
  -5  -2 -10   98.82    6.86 
   5  -2  10  118.90    6.13 
   5  -2  10  103.72    5.94 
   5  -2  10  109.26    6.09 
  -5  -2 -11   92.73    6.11 
  -5  -2 -11   82.06    5.56 
  -5  -2 -11   96.43    6.32 
  -5  -2 -11   98.02    6.53 
   5  -2  11  102.61    5.60 
  -5  -2 -11   92.52    6.56 
   5  -2  11   94.62    5.32 
   5  -2  11   94.60    5.69 
  -5  -2 -12   50.12    4.71 
   5  -2  12   49.08    3.94 
  -5  -2 -12   49.16    3.86 
  -5  -2 -12   49.67    4.68 
  -5  -2 -12   59.41    5.38 
  -5  -2 -12   49.01    4.77 
   5  -2  12   52.54    3.58 
  -5  -2 -13   21.20    3.87 
   5  -2  13   25.70    2.00 
  -5  -2 -13   32.55    4.32 
   5  -2  13   31.74    2.97 
  -5  -2 -13   20.61    4.02 
   5  -2  13   24.60    2.99 
   5  -2  13   22.65    2.61 
  -5  -2 -14   57.27    4.19 
  -5  -2 -14   56.08    4.39 
  -5  -2 -14   61.24    4.66 
   5  -2  14   60.32    3.61 
   5  -2  14   53.73    3.16 
  -5  -2 -15   32.31    2.87 
   5  -2  15   32.90    2.21 
  -5  -2 -15   31.87    2.85 
   5  -2  15   27.61    1.71 
   5  -1 -18    9.83    2.28 
   5  -1 -18    3.74    1.95 
  -5  -1  18    8.11    1.41 
  -5  -1  17   21.25    2.53 
   5  -1 -17   23.18    3.23 
   5  -1 -17   19.91    2.44 
   5  -1 -17   23.85    3.11 
  -5  -1  17   20.93    2.29 
   5  -1 -16   26.90    3.83 
  -5  -1  16   27.25    2.99 
   5  -1 -16   26.72    3.69 
   5  -1 -16   18.98    2.75 
   5  -1 -16   29.03    3.67 
  -5  -1  16   25.99    2.83 
   5  -1 -15    4.21    2.91 
   5  -1 -15    4.65    2.05 
   5  -1 -15    5.60    3.37 
  -5  -1  15    7.39    2.69 
   5  -1 -15    9.05    2.58 
  -5  -1  15    9.57    2.86 
   5  -1 -14  237.92   11.03 
  -5  -1  14  260.85   11.39 
   5  -1 -14  244.19   11.21 
   5  -1 -14  267.38   11.60 
  -5  -1  14  240.56   11.25 
   5  -1 -13  286.75   12.51 
  -5  -1  13  294.73   12.76 
  -5  -1  13  265.18   12.27 
  -5  -1  13  272.18   12.74 
  -5  -1  13  291.04   12.11 
   5  -1 -13  297.41   12.63 
   5  -1 -13  309.14   12.97 
  -5  -1  13  283.67   12.79 
   5  -1 -12   46.03    3.35 
  -5  -1  12   45.19    3.11 
  -5  -1  12   40.42    3.25 
  -5  -1  12   42.39    3.98 
   5  -1 -12   46.87    3.51 
  -5  -1  12   46.84    3.50 
   5  -1 -11   27.47    2.68 
  -5  -1  11   27.02    3.44 
  -5  -1  11   28.82    2.70 
  -5  -1  11   26.55    2.59 
  -5  -1  11   26.58    2.69 
   5  -1 -10   35.53    2.80 
  -5  -1  10   34.60    3.63 
  -5  -1  10   30.45    2.81 
  -5  -1  10   30.71    3.18 
  -5  -1  10   27.84    2.71 
  -5  -1  10   33.30    2.81 
  -5  -1   9  103.78    5.67 
  -5  -1   9  100.05    5.11 
  -5  -1   9   98.72    5.44 
  -5  -1   9   96.95    5.07 
  -5  -1   9  103.88    5.52 
  -5  -1   9  104.40    5.14 
  -5  -1   8   82.14    4.24 
   5  -1  -8   75.16    5.10 
  -5  -1   8   77.65    4.51 
   5  -1  -8   77.68    7.11 
  -5  -1   8   78.99    4.21 
  -5  -1   8   80.78    4.47 
  -5  -1   8   73.35    4.02 
  -5  -1   7 1634.04   66.96 
   5  -1  -7 1614.95   66.28 
  -5  -1   7 1659.41   64.42 
  -5  -1   7 1789.45   66.72 
  -5  -1   7 1620.62   64.57 
  -5  -1   7 1652.89   64.40 
   5  -1  -7 1584.83   67.33 
  -5  -1   7 1658.26   64.49 
   5  -1  -7 1520.27   66.32 
  -5  -1   7 1618.18   64.53 
  -5  -1   7 1626.35   64.32 
  -5  -1   6  674.14   26.92 
  -5  -1   6  640.76   27.26 
  -5  -1   6  627.19   24.80 
  -5  -1   6  605.51   24.96 
  -5  -1   6  638.69   24.87 
   5  -1  -6  643.55   27.83 
   5  -1  -6  602.16   25.54 
   5  -1  -6  563.58   26.38 
  -5  -1   6  596.40   24.87 
  -5  -1   5  581.17   23.88 
  -5  -1   5  568.51   24.30 
  -5  -1   5  521.24   22.04 
  -5  -1   5  559.53   21.93 
   5  -1  -5  538.50   24.34 
   5  -1  -5  533.46   22.69 
   5  -1  -5  539.24   23.26 
   5  -1  -5  567.78   23.31 
   5  -1  -5  508.24   23.32 
  -5  -1   4  857.34   33.10 
   5  -1  -4  774.12   32.26 
   5  -1  -4  763.18   31.92 
  -5  -1   4  780.99   31.22 
  -5  -1   4  789.19   31.11 
   5  -1  -4  744.95   32.19 
  -5  -1   4  761.14   31.26 
  -5  -1   4  791.63   31.05 
   5  -1  -4  780.23   33.18 
   5  -1  -4  801.70   32.39 
   5  -1  -4  768.89   32.48 
  -5  -1   3  452.16   18.67 
   5  -1  -3  422.00   16.99 
  -5  -1   3  435.22   18.91 
  -5  -1   3  420.07   16.84 
   5  -1  -3  397.95   17.63 
   5  -1  -3  372.95   17.19 
   5  -1  -3  406.34   18.47 
  -5  -1   3  403.66   16.83 
   5  -1  -3  425.36   17.87 
   5  -1  -3  395.17   17.56 
   5  -1  -2  563.10   22.71 
   5  -1  -2  572.65   22.73 
  -5  -1   2  602.79   23.04 
  -5  -1   2  651.21   24.04 
   5  -1  -2  558.09   23.22 
   5  -1  -2  472.05   21.46 
   5  -1  -2  531.36   22.45 
   5  -1  -2  534.54   21.35 
   5  -1  -1  101.58    6.21 
   5  -1  -1  106.14    6.16 
  -5  -1   1  115.45    7.02 
  -5  -1   1  119.36    6.15 
   5  -1   0  110.10    6.52 
  -5  -1   0  111.67    7.12 
  -5  -1   0  128.29    7.38 
  -5  -1   0  118.24    6.19 
   5  -1   0  115.61    6.80 
   5  -1   1   69.52    4.75 
  -5  -1  -1   67.57    5.25 
   5  -1   1   60.73    4.32 
   5  -1   1   68.19    4.85 
  -5  -1  -1   61.36    3.34 
  -5  -1  -1   60.34    4.96 
   5  -1   1   63.13    3.96 
  -5  -1  -2  806.80   32.07 
   5  -1   2  766.26   33.64 
  -5  -1  -2  815.49   32.12 
  -5  -1  -2  799.82   32.08 
   5  -1   2  840.05   33.20 
  -5  -1  -2  773.38   33.89 
  -5  -1  -2  814.78   32.16 
   5  -1   2  775.01   33.72 
   5  -1   2  833.13   33.00 
   5  -1   3  463.69   19.02 
  -5  -1  -3  480.47   19.18 
   5  -1   3  474.01   20.94 
  -5  -1  -3  423.15   19.65 
  -5  -1  -3  475.68   19.20 
  -5  -1  -3  469.75   19.28 
  -5  -1  -3  480.50   19.21 
   5  -1   3  520.60   20.28 
  -5  -1  -3  487.28   19.30 
   5  -1   3  462.59   19.00 
  -5  -1  -3  467.95   20.91 
   5  -1   3  468.69   20.77 
   5  -1   3  488.37   20.05 
  -5  -1  -4   73.96    4.03 
   5  -1   4   76.10    4.76 
   5  -1   4   73.03    5.37 
  -5  -1  -4   74.24    4.01 
  -5  -1  -4   73.90    4.12 
  -5  -1  -4   63.47    4.26 
  -5  -1  -4   76.93    4.10 
   5  -1   4   69.87    4.45 
  -5  -1  -4   70.50    4.06 
   5  -1   4   73.04    3.72 
  -5  -1  -4   64.65    5.20 
   5  -1   4   72.78    3.77 
  -5  -1  -5 1209.35   47.67 
   5  -1   5 1158.49   48.45 
  -5  -1  -5 1201.84   47.63 
  -5  -1  -5 1206.45   47.75 
  -5  -1  -5 1233.63   47.74 
   5  -1   5 1189.59   47.49 
  -5  -1  -5 1251.08   47.78 
   5  -1   5 1146.38   47.62 
   5  -1   5 1208.35   47.53 
  -5  -1  -6  330.87   14.00 
  -5  -1  -6  317.49   13.83 
  -5  -1  -6  322.80   14.03 
  -5  -1  -6  335.71   14.10 
  -5  -1  -6  331.43   14.10 
   5  -1   6  318.34   13.96 
   5  -1   6  330.52   13.75 
   5  -1   6  320.39   13.59 
   5  -1   6  337.22   13.83 
   5  -1   7 1127.21   45.96 
  -5  -1  -7 1208.36   46.44 
  -5  -1  -7 1127.32   46.17 
  -5  -1  -7 1123.34   46.36 
  -5  -1  -7 1176.30   46.49 
  -5  -1  -7 1193.83   46.44 
   5  -1   7 1168.97   46.30 
   5  -1   7 1135.93   46.10 
   5  -1   7 1194.91   46.18 
   5  -1   8   22.65    2.74 
  -5  -1  -8   27.46    3.68 
  -5  -1  -8   22.26    2.97 
  -5  -1  -8   19.95    3.42 
   5  -1   8   29.23    3.38 
  -5  -1  -8   30.30    3.95 
   5  -1   8   25.96    2.97 
   5  -1   8   22.53    2.83 
   5  -1   9   38.43    3.61 
  -5  -1  -9   41.16    4.32 
  -5  -1  -9   39.25    3.44 
  -5  -1  -9   36.89    3.96 
  -5  -1  -9   33.65    4.06 
   5  -1   9   39.40    4.07 
   5  -1   9   36.76    3.52 
   5  -1   9   38.12    3.67 
   5  -1  10   43.65    3.76 
   5  -1  10   43.44    3.77 
  -5  -1 -10   37.43    4.55 
  -5  -1 -10   38.05    4.08 
  -5  -1 -10   37.68    4.33 
   5  -1  10   38.25    4.08 
   5  -1  10   39.26    3.75 
  -5  -1 -11   88.91    6.33 
  -5  -1 -11   77.87    5.54 
  -5  -1 -11   91.72    6.05 
   5  -1  11   93.99    5.48 
   5  -1  11   93.77    5.17 
  -5  -1 -12   62.57    5.59 
  -5  -1 -12   67.41    5.22 
  -5  -1 -12   58.36    4.45 
   5  -1  12   65.97    3.61 
   5  -1  12   67.00    4.38 
   5  -1  12   53.51    4.07 
  -5  -1 -13   26.13    4.46 
  -5  -1 -13   25.20    4.60 
  -5  -1 -13   19.08    3.58 
   5  -1  13   20.75    2.88 
   5  -1  13   24.75    2.63 
  -5  -1 -14   35.63    4.37 
   5  -1  14   37.22    3.03 
  -5  -1 -14   33.38    3.51 
  -5  -1 -14   29.88    4.20 
   5  -1  14   34.85    2.59 
   5  -1  15    0.71    1.65 
  -5  -1 -15    2.47    2.00 
   5  -1  15    1.00    1.08 
   5  -1  16   34.21    2.05 
   5   0 -19   13.16    1.68 
  -5   0  19   15.61    1.32 
  -5   0  19   12.52    1.16 
   5   0 -18    4.56    2.17 
  -5   0  18    5.98    1.59 
   5   0 -18    8.07    1.82 
   5   0 -18    3.18    1.68 
   5   0 -18    7.37    2.08 
  -5   0  18    9.00    1.57 
   5   0 -17    2.97    2.18 
   5   0 -17    3.27    2.93 
  -5   0  17    0.93    1.82 
   5   0 -17    0.87    2.34 
   5   0 -17    1.01    2.49 
  -5   0  17   -0.08    1.86 
   5   0 -16  112.53    6.52 
  -5   0  16  110.33    5.86 
   5   0 -16  106.75    6.14 
   5   0 -16  115.30    6.33 
  -5   0  16  117.89    5.89 
   5   0 -16  114.75    6.16 
   5   0 -15   21.20    3.53 
   5   0 -15   18.05    3.20 
  -5   0  15   18.81    3.19 
  -5   0  15   23.57    2.92 
  -5   0  15   19.63    2.81 
   5   0 -14   98.10    5.53 
  -5   0  14   88.58    5.29 
  -5   0  14   88.76    5.46 
   5   0 -14   94.03    5.58 
   5   0 -14   88.52    4.80 
   5   0 -14   86.82    5.77 
  -5   0  14   96.96    5.57 
   5   0 -13   75.11    4.97 
   5   0 -13   69.27    4.73 
  -5   0  13   68.92    4.14 
  -5   0  13   83.64    4.83 
  -5   0  13   72.62    4.54 
   5   0 -13   77.82    4.28 
   5   0 -13   67.97    4.98 
   5   0 -12  195.33    9.26 
  -5   0  12  205.03    8.95 
  -5   0  12  202.94    9.29 
  -5   0  12  190.14    9.34 
   5   0 -12  190.02    8.82 
   5   0 -12  203.77    9.31 
   5   0 -11  164.64    7.65 
  -5   0  11  151.31    7.84 
   5   0 -11  153.08    7.07 
  -5   0  11  170.58    7.76 
  -5   0  11  157.13    7.76 
   5   0 -11  155.83    7.26 
  -5   0  11  160.63    7.41 
  -5   0  11  158.03    7.77 
  -5   0  10  154.18    7.16 
  -5   0  10  158.65    7.71 
  -5   0  10  158.77    7.42 
  -5   0  10  151.02    7.38 
   5   0 -10  158.35    7.01 
   5   0 -10  149.04    6.84 
  -5   0  10  150.19    7.43 
  -5   0   9  155.77    7.57 
  -5   0   9  166.31    7.55 
  -5   0   9  149.17    7.47 
   5   0  -9  156.10    6.95 
   5   0  -9  154.86    6.86 
  -5   0   9  157.23    7.14 
  -5   0   9  152.29    7.27 
  -5   0   9  152.32    7.29 
  -5   0   8    0.35    1.99 
   5   0  -8    1.18    2.10 
  -5   0   8    0.21    1.76 
  -5   0   8    1.52    1.79 
  -5   0   8    3.30    2.19 
   5   0  -8    5.31    3.60 
   5   0  -8    2.66    1.25 
  -5   0   8    2.90    1.96 
   5   0  -8    2.81    1.45 
  -5   0   8   -1.62    2.00 
  -5   0   7   -0.54    2.49 
  -5   0   7   -0.26    1.56 
  -5   0   7    1.16    2.03 
  -5   0   7    4.15    1.83 
  -5   0   7   -0.40    1.77 
  -5   0   7   -1.06    2.06 
   5   0  -7    0.48    1.94 
   5   0  -7    2.35    1.13 
   5   0  -7   -0.92    2.90 
   5   0  -7    1.73    3.34 
   5   0  -7    0.71    1.98 
  -5   0   7   -0.07    1.72 
  -5   0   7    0.14    1.67 
  -5   0   6  534.57   21.95 
  -5   0   6  508.25   20.54 
  -5   0   6  443.63   20.46 
  -5   0   6  543.36   20.40 
   5   0  -6  530.89   22.69 
   5   0  -6  526.87   21.89 
  -5   0   6  526.11   20.48 
   5   0  -6  426.58   21.78 
   5   0  -6  499.67   22.13 
  -5   0   6  504.03   20.38 
  -5   0   5   34.57    3.89 
  -5   0   5   34.22    2.53 
   5   0  -5   30.03    3.03 
  -5   0   5   32.28    3.23 
   5   0  -5   29.26    3.70 
   5   0  -5   28.87    4.05 
   5   0  -5   32.53    3.50 
   5   0  -4   28.84    3.07 
   5   0  -4   23.74    2.80 
  -5   0   4   29.34    3.13 
   5   0  -4   30.42    3.13 
  -5   0   4   23.43    2.23 
  -5   0   4   29.62    3.42 
   5   0  -4   20.65    3.52 
  -5   0   3 1126.20   43.51 
   5   0  -3 1022.46   42.93 
  -5   0   3 1106.97   43.27 
   5   0  -3  982.27   43.32 
   5   0  -3 1079.68   43.08 
   5   0  -3 1029.88   42.89 
  -5   0   2  941.68   36.67 
   5   0  -2  867.59   35.00 
  -5   0   2  878.93   36.43 
   5   0  -2  905.03   36.18 
   5   0  -2  839.29   36.05 
   5   0  -1   70.61    4.82 
  -5   0   1   66.65    5.19 
   5   0  -1   73.23    3.19 
   5   0  -1   72.54    4.73 
   5   0   0  171.73    8.49 
   5   0   0  168.04    8.33 
   5   0   1  141.28    7.78 
  -5   0  -1  137.58    7.55 
   5   0   1  143.02    7.62 
  -5   0  -1  143.40    7.61 
   5   0   1  145.32    7.65 
   5   0   1  147.53    7.65 
  -5   0  -2   18.63    2.75 
  -5   0  -2   16.61    1.71 
   5   0   2   18.70    2.67 
  -5   0  -2   20.04    1.94 
  -5   0  -2   20.59    2.77 
   5   0   2   19.13    2.57 
   5   0   2   19.25    2.65 
  -5   0  -3  414.56   17.01 
   5   0   3  397.09   18.60 
  -5   0  -3  432.09   17.05 
   5   0   3  462.76   18.55 
  -5   0  -3  419.74   18.03 
  -5   0  -3  405.89   16.97 
  -5   0  -3  388.63   16.84 
   5   0   3  429.96   16.95
[truncated: 325,948 more chars]
